# Supplementary material for: Systematic analysis of naturally occurring insertions and deletions that alter transcription factor spacing identifies tolerant and sensitive transcription factor pairs
Source: eLife. 2022 Jan 20;11:e70878. doi: 10.7554/eLife.70878 (PMC8809895; doi:10.7554/eLife.70878)
Supplement: Figure 1—source data 1. — A number represents chromatin immunoprecipitation sequencing (ChIP-seq) peaks of the TF on row that overlap with at least one ChIP-seq peak of the TF on column. Therefore, the number for (TF1, TF2) may not equal but should be close to the number for (TF2, TF1). [file elife-70878-fig1-data1.csv]

	ATF1	ATF3	BACH1	BHLHE40	CEBPB	CEBPG	CREB1	CREM	CTCF	CUX1	E2F1	E2F3	E2F5	E2F7	E2F8	EGR1	ELF1	ELF4	ELK1	ETS1	ETV1	ETV6	FOSL1	FOXA3	FOXJ2	GABPA	GATA1	GATA2	IKZF1	IRF1	IRF2	IRF9	JUN	JUNB	JUND	KLF1	KLF13	KLF16	MAFK	MEF2A	MEIS2	MYC	NFATC3	NFE2	NFIC	NFIX	NR2C1	NR2C2	NR2F1
ATF1		1116	178	1055	828	335	1682	1874	1254	142	764	1035	1122	495	1147	1525	943	956	812	915	1231	743	629	216	401	1522	295	508	924	106	555	123	1220	330	617	679	687	1007	698	210	496	1187	563	502	1705	152	467	822	438
ATF3	1116		324	986	2066	955	2313	3608	1046	388	379	449	514	240	637	1002	649	619	353	506	1227	624	2272	488	671	1395	808	1106	1325	165	599	246	3968	742	2493	387	332	697	1405	467	1110	983	711	1444	1682	187	434	1053	887
BACH1	177	325		543	768	277	467	402	714	333	166	184	222	156	389	598	392	380	148	349	841	442	2186	411	722	769	613	832	1189	168	566	195	619	1062	2462	266	216	535	3550	395	801	591	688	3523	1446	166	325	592	500
BHLHE40	1055	987	542		1983	660	1363	1944	3443	528	875	1542	1756	597	1498	2795	1345	1302	794	1482	2355	1303	2902	783	1225	2763	1236	2055	2808	304	1193	268	1525	1012	2921	1033	966	2078	1929	660	1559	4353	1091	2025	4059	344	950	2106	1373
CEBPB	826	2069	770	1986		10893	1456	1847	3894	1059	681	831	1069	495	1228	2031	1218	1256	561	1047	2543	1412	3484	1323	1702	2782	2178	3049	3549	431	1676	1008	2572	1269	3632	699	643	1785	2909	1096	2207	2193	1749	2777	4120	471	836	1904	1637
CEBPG	335	954	276	657	10879		506	619	1094	382	243	280	359	141	404	655	463	429	204	351	1088	532	1283	554	754	1193	672	928	1100	205	664	620	1294	518	1318	281	229	618	1065	394	844	758	658	973	1281	171	274	686	570
CREB1	1682	2312	467	1361	1455	506		5023	1984	449	542	737	912	380	1028	1633	1017	1046	555	993	1768	1056	1868	671	935	2060	1208	1817	1879	199	919	245	2930	972	2025	632	557	1439	1826	629	1703	1474	1045	1553	2826	270	728	1411	1098
CREM	1874	3607	403	1944	1843	621	5023		2716	565	567	792	1053	397	1041	1923	1027	1037	543	939	1942	1084	2583	710	995	2459	1328	1951	2224	215	922	270	4067	973	2868	622	543	1441	1961	691	1705	1850	1056	1911	3001	267	771	1862	1325
CTCF	1257	1050	716	3447	3886	1097	1983	2717		1303	1144	2202	3330	877	2632	3815	2016	1817	1214	2401	3587	2054	2642	1162	1866	3971	1446	2905	5142	405	2818	412	1960	1173	3331	1364	1485	6680	3905	1175	2102	5331	2551	2433	6941	561	1234	2693	1847
CUX1	142	387	333	527	1056	383	449	564	1301		167	194	262	132	357	523	375	403	145	278	785	471	1281	474	631	728	913	1234	1250	145	587	205	689	563	1420	178	150	574	1120	363	907	591	711	1072	1272	154	265	577	480
E2F1	760	379	167	874	680	243	539	564	1131	168		1704	1658	1165	1846	1487	1056	1082	762	854	1247	826	470	237	385	1395	255	485	971	102	568	133	438	242	431	719	720	1082	554	222	424	1012	593	346	1792	144	524	731	448
E2F3	1038	451	184	1543	829	282	740	794	2191	194	1703		2552	1060	2011	2378	1292	1230	1046	1429	1697	1101	636	296	472	2187	295	603	1249	134	741	150	617	299	566	1090	1063	1693	696	253	537	1931	612	471	2761	211	657	1221	561
E2F5	1126	515	222	1753	1070	360	912	1054	3324	262	1659	2545		937	2237	2641	1438	1476	1123	1681	2078	1312	965	356	653	2656	545	928	1712	178	972	157	776	480	969	1077	1048	2160	977	341	697	2264	749	774	3226	223	774	1525	732
E2F7	491	240	156	593	495	141	379	394	875	133	1166	1057	935		1442	1010	700	697	532	628	915	614	407	189	301	961	314	467	875	82	401	128	308	227	374	537	453	796	491	209	349	738	505	320	1326	127	348	479	359
E2F8	1144	636	389	1495	1223	404	1028	1039	2628	356	1846	2011	2238	1442		2532	1788	1719	1293	1662	2481	1503	1159	489	779	2756	782	1226	2253	215	1138	250	948	644	1140	1118	1053	2136	1269	473	920	1936	1260	937	3399	258	847	1339	896
EGR1	1526	1004	598	2788	2024	657	1635	1921	3787	522	1490	2370	2649	1013	2527		2160	1985	1357	2263	3214	2002	2667	789	1150	3780	1278	2174	3455	268	1413	359	1543	1256	2966	1720	1789	4224	2011	837	1546	3232	1427	2130	5589	401	1357	2393	1550
ELF1	944	649	390	1340	1208	463	1018	1024	2008	375	1054	1286	1439	700	1787	2156		3364	1736	2183	3957	2438	1326	602	834	4293	829	1229	2650	256	1229	324	974	812	1363	1086	912	1695	1424	501	1029	1710	1230	1081	3081	273	971	1446	898
ELF4	954	618	379	1300	1248	429	1044	1036	1812	402	1079	1223	1473	696	1718	1981	3363		1799	2206	3787	2364	1303	582	824	3965	922	1348	2534	231	1263	297	922	701	1324	1017	851	1583	1393	498	1020	1676	1238	1070	3046	249	964	1459	873
ELK1	810	353	148	795	561	205	553	543	1211	144	762	1040	1121	531	1293	1358	1736	1799		1723	2302	1324	426	208	379	2389	237	390	892	113	666	166	507	238	368	931	722	1023	575	212	412	948	598	312	1703	147	597	822	457
ETS1	917	507	349	1480	1043	351	993	939	2398	280	854	1430	1682	630	1666	2257	2182	2205	1725		3490	2100	1197	416	673	3725	730	1288	2189	199	989	231	827	725	1229	1015	903	1947	1237	420	893	1876	1016	985	3206	283	859	1431	820
ETV1	1230	1230	843	2362	2543	1089	1766	1941	3581	786	1246	1692	2083	914	2485	3217	3958	3786	2305	3492		4013	3154	1289	1641	8221	2153	3162	5159	614	2026	646	2142	1688	3316	1547	1235	2957	2896	1005	2347	2918	2147	2466	5232	555	1452	2684	1817
ETV6	741	626	442	1303	1411	533	1056	1084	2047	473	829	1099	1314	616	1503	2006	2439	2364	1324	2100	4015		1825	719	941	4191	1428	2104	3502	276	1296	330	1117	1094	1892	899	731	1982	1725	627	1273	1674	1386	1461	3273	308	863	1503	1077
FOSL1	628	2273	2185	2898	3473	1289	1865	2582	2631	1282	468	636	964	407	1162	2673	1332	1304	426	1196	3152	1823		1768	2255	3472	2890	4027	4795	528	1591	510	4251	5387	18261	742	578	2112	5865	1485	3328	2398	2079	10486	5169	443	1028	2705	2485
FOXA3	217	489	409	779	1317	556	671	710	1162	477	236	295	355	190	489	785	602	584	208	415	1291	721	1766		2387	1401	1533	1869	1764	230	869	280	895	719	1755	349	264	821	1364	614	1315	855	947	1333	1888	265	395	901	834
FOXJ2	400	671	722	1226	1694	756	935	995	1865	632	384	469	653	300	777	1145	836	826	379	671	1643	940	2255	2386		1823	1893	2303	2200	312	1212	398	1310	949	2234	473	394	1132	2041	813	1578	1327	1305	1748	2798	352	512	1162	915
GABPA	1519	1398	768	2759	2776	1195	2060	2456	3956	729	1394	2174	2653	963	2755	3772	4295	3965	2389	3723	8217	4188	3475	1399	1822		2069	3106	5127	548	2246	564	2251	1674	3462	1625	1367	3198	2937	1055	2392	3351	2080	2578	5640	521	1592	3251	1910
GATA1	294	809	613	1234	2171	672	1209	1328	1446	915	255	294	546	313	784	1278	828	923	237	730	2152	1428	2891	1534	1893	2071		6863	3600	316	1270	398	1558	1314	2945	541	349	1984	2361	1132	2444	1496	1670	2185	4011	325	693	1444	1568
GATA2	511	1110	832	2054	3049	929	1817	1949	2907	1237	485	600	928	468	1228	2175	1235	1351	392	1286	3163	2104	4034	1869	2303	3112	6863		5508	452	1760	545	2023	1851	4174	814	529	2865	3339	1557	3319	2417	2232	3061	6214	487	1045	2190	2271
IKZF1	927	1332	1189	2817	3536	1105	1883	2228	5141	1255	974	1261	1715	880	2256	3476	2658	2537	894	2193	5162	3504	4799	1764	2200	5138	3602	5514		618	2550	736	2275	2075	5132	1119	942	3428	3984	1514	2935	3273	3203	3894	7090	642	1470	2915	2342
IRF1	107	164	168	300	428	205	198	214	402	146	102	133	178	82	215	268	255	231	113	197	610	273	526	229	313	547	315	449	612		1996	345	280	253	494	179	151	257	460	186	312	346	364	391	584	129	178	335	240
IRF2	555	601	571	1192	1673	668	919	923	2818	590	570	744	972	403	1135	1412	1233	1263	667	988	2023	1296	1592	869	1215	2248	1269	1758	2539	1997		552	1095	809	1715	597	540	1412	1827	771	1236	1596	1548	1401	2759	291	631	1239	846
IRF9	123	246	196	267	1006	620	245	270	409	205	133	149	157	128	250	358	325	297	166	231	645	330	510	280	397	566	399	546	736	345	552		464	248	504	199	159	304	517	215	367	362	494	387	785	145	216	345	312
JUN	1220	3967	620	1525	2570	1297	2929	4067	1959	691	438	614	776	308	949	1543	980	923	507	825	2140	1117	4252	897	1312	2252	1558	2026	2271	281	1092	464		1459	4521	590	522	1302	2527	866	1846	1638	1320	2614	2869	342	691	1779	1496
JUNB	330	743	1063	1010	1266	519	974	973	1171	563	242	300	480	227	643	1257	814	702	239	725	1687	1095	5389	720	950	1675	1314	1848	2073	251	810	249	1458		5790	458	352	1168	2425	702	1412	1104	1031	4218	2513	230	597	1211	1127
JUND	617	2494	2462	2918	3627	1321	2024	2868	3329	1423	430	564	969	377	1142	2969	1367	1329	368	1228	3316	1891	18265	1755	2237	3466	2949	4177	5126	494	1718	506	4521	5789		717	548	2317	6420	1606	3480	2583	2170	11478	5527	457	1093	2831	2537
KLF1	679	387	266	1031	697	281	631	622	1355	180	719	1086	1075	535	1118	1717	1087	1018	931	1011	1546	895	744	348	474	1627	541	813	1111	179	595	198	589	457	717		1116	1563	800	267	587	1192	622	601	2080	257	615	918	622
KLF13	686	333	216	963	642	229	555	539	1480	150	718	1060	1046	453	1052	1788	912	853	722	902	1232	729	574	264	394	1367	348	529	936	151	539	158	522	352	545	1118		1439	661	247	515	1262	538	439	1837	200	551	859	495
KLF16	1009	697	536	2076	1777	618	1437	1441	6680	574	1086	1692	2160	798	2137	4230	1703	1588	1025	1950	2958	1977	2113	821	1134	3211	1982	2866	3426	257	1413	305	1302	1167	2318	1570	1442		2073	801	1610	2897	1402	1813	4896	401	1014	1890	1375
MAFK	699	1405	3551	1928	2911	1067	1826	1963	3905	1122	554	695	979	491	1269	2014	1430	1394	576	1236	2895	1726	5866	1366	2044	2941	2362	3338	3986	460	1825	520	2529	2424	6419	801	661	2071		1222	2638	2230	2088	8481	4746	545	968	2110	1660
MEF2A	210	467	395	658	1091	394	628	689	1173	363	223	253	341	209	471	836	502	499	211	420	1005	625	1485	614	813	1055	1134	1556	1506	187	770	214	866	702	1605	268	247	799	1222		933	711	818	1229	1791	205	336	661	626
MEIS2	496	1111	802	1555	2203	845	1705	1706	2097	905	422	529	695	349	918	1543	1033	1020	412	890	2345	1272	3328	1316	1578	2395	2444	3317	2928	311	1230	366	1844	1414	3480	585	515	1608	2634	932		1606	1424	2592	3508	382	670	1595	1364
MYC	1186	984	591	4350	2187	760	1475	1850	5331	590	1014	1928	2267	741	1939	3234	1715	1680	949	1875	2921	1677	2400	857	1330	3362	1497	2421	3272	349	1599	364	1638	1105	2583	1194	1263	2898	2231	713	1608		1390	1982	5024	422	1088	2332	1427
NFATC3	565	710	690	1094	1741	658	1047	1057	2553	711	597	615	752	505	1263	1430	1231	1238	601	1015	2146	1387	2076	947	1303	2084	1667	2229	3201	364	1549	493	1317	1029	2166	622	539	1403	2088	820	1426	1393		1723	2998	325	689	1162	994
NFE2	504	1444	3523	2024	2772	976	1554	1913	2431	1074	348	471	774	321	938	2133	1088	1072	312	985	2464	1461	10489	1334	1746	2582	2188	3058	3898	391	1394	387	2615	4217	11475	601	440	1813	8480	1229	2591	1980	1725		4415	385	886	2160	1856
NFIC	1732	1702	1457	4106	4132	1292	2856	3029	6964	1282	1813	2803	3275	1340	3432	5675	3132	3105	1733	3256	5289	3318	5214	1906	2822	5717	4044	6258	7142	594	2780	800	2897	2531	5557	2109	1864	4941	4782	1804	3531	5074	3031	4438		4426	2142	3896	2980
NFIX	153	187	168	344	471	172	270	267	558	155	144	211	222	126	258	404	274	250	148	281	556	305	444	265	352	521	328	489	640	131	290	145	341	230	457	256	200	399	547	205	384	419	325	385	4417		178	313	268
NR2C1	467	434	325	947	835	275	728	770	1234	264	525	650	775	348	847	1353	970	964	597	859	1451	863	1026	397	511	1589	692	1045	1460	177	629	216	692	595	1090	615	551	1013	966	336	670	1082	687	885	2116	178		3353	2426
NR2C2	821	1053	592	2103	1894	686	1410	1859	2681	576	731	1212	1523	479	1336	2389	1444	1458	821	1429	2676	1501	2705	903	1160	3250	1443	2190	2905	334	1236	345	1777	1209	2825	916	858	1883	2106	661	1595	2326	1162	2157	3831	313	3352		4588
NR2F1	436	890	501	1380	1630	572	1104	1329	1848	482	452	558	739	361	898	1555	902	876	460	822	1825	1084	2489	833	918	1919	1568	2281	2344	240	849	315	1499	1128	2536	626	498	1377	1662	627	1367	1427	1000	1857	2955	268	2435	4602
NR2F2	607	1253	785	2262	2683	760	1818	2362	4215	932	568	805	1145	441	1246	2441	1306	1358	562	1376	2738	1650	3887	1286	1475	2832	2515	3981	4247	373	1632	418	2104	1629	4233	750	635	2329	2891	1131	2344	2423	1740	3061	4939	374	2523	5024	5211
NR2F6	477	513	378	1160	1225	428	897	998	2146	392	481	794	824	356	880	1548	909	857	501	965	1595	1038	1438	603	717	1647	1072	1723	1932	227	882	285	949	826	1517	681	567	1370	1398	525	942	1380	904	1207	2790	361	1947	3137	3270
NRF1	1956	911	429	3400	1931	664	1642	1805	4646	426	1956	3337	3690	1193	2868	4994	2354	2316	1827	2650	3216	1901	1642	581	1080	4170	822	1503	2840	267	1503	269	1293	773	1632	1866	1828	3273	1653	579	1229	3749	1228	1280	5355	393	1303	2499	1221
PBX2	458	465	335	876	956	378	794	784	1206	376	411	512	571	317	686	1044	703	693	360	597	1208	726	1211	477	712	1333	852	1270	1348	138	667	182	739	703	1310	495	404	944	1095	388	2311	957	640	1077	1898	248	433	806	597
PKNOX1	844	1042	685	1748	2042	724	1450	1658	2439	782	761	906	1091	569	1269	2105	1326	1342	660	1109	2388	1298	2873	936	1223	2665	1810	2653	2806	295	1275	334	1575	1350	3087	788	666	1766	2250	717	4552	1822	1293	2381	3752	327	836	1642	1279
RREB1	530	348	286	949	717	304	562	596	1398	200	476	816	848	348	838	1432	767	696	475	789	1330	802	798	376	509	1428	550	856	1228	186	616	240	587	465	826	734	616	1218	890	307	599	1142	551	673	1912	277	458	833	543
RUNX1	581	664	613	1711	1693	541	1348	1277	3583	575	511	829	1073	428	1214	2252	1160	1123	561	1411	2239	1501	2132	889	1114	2344	1805	2883	2995	292	1174	357	1263	1226	2335	892	700	2494	2153	792	1481	2292	1303	1855	4190	439	773	1548	1311
SOX6	275	986	723	1644	2708	869	1386	1601	1721	1073	281	323	632	312	843	1471	878	1016	211	826	2582	1662	3689	1953	2322	2475	6622	8397	4524	376	1476	469	1844	1516	3827	527	331	2194	2805	1317	2992	1798	1956	2830	4844	352	795	1771	2003
SP1	1299	564	224	1650	934	362	950	977	2053	213	1328	1866	2067	828	1912	3013	1652	1562	1286	1540	1972	1156	698	322	559	2483	364	601	1461	129	851	169	771	364	641	1512	1563	1983	860	278	711	1997	763	529	2978	218	846	1427	766
SPI1	1253	1259	950	2893	3254	1041	1955	2352	4987	1113	1280	1788	2233	940	2387	3618	3709	3410	1586	2882	5599	4585	3940	1506	1784	6946	2455	4030	6926	531	2487	581	2149	1910	4139	1463	1191	3570	3580	1257	2582	3397	2271	3274	6014	638	1519	2884	2039
SREBF2	237	211	158	784	497	166	342	391	731	158	212	310	312	149	375	566	367	337	182	311	489	347	446	195	278	524	295	490	691	72	335	95	319	260	465	257	221	443	489	203	322	740	339	402	986	148	258	432	311
SRF	254	486	288	825	1212	448	641	767	1651	396	252	314	455	174	493	866	566	603	447	455	1272	693	1465	585	747	1415	1167	1703	1695	242	753	282	866	591	1428	407	314	957	1207	611	932	998	780	1053	1854	215	383	1015	793
STAT1	306	334	376	565	760	276	604	456	1115	285	392	413	475	388	752	800	1002	973	489	790	1569	1150	987	485	589	1562	1105	1474	1690	320	976	276	605	631	1010	471	392	930	1127	480	804	829	990	808	1793	217	448	718	638
STAT2	306	312	361	532	743	285	530	445	961	290	339	398	438	276	711	799	733	741	402	640	1235	805	924	430	597	1262	1072	1419	1466	324	1053	254	574	571	966	352	324	855	1001	422	758	767	922	780	1667	156	429	656	589
STAT5A	373	580	503	1024	1594	505	936	942	1910	552	365	449	617	299	841	1192	998	1120	500	822	1933	1287	1985	911	1110	1896	1886	2587	2801	267	1090	356	1115	964	2168	512	426	1429	1819	863	1526	1255	1392	1628	3044	317	562	1120	1039
TAL1	925	1162	1111	2551	3175	873	2012	2013	3132	1154	963	1272	1559	776	1807	3007	1749	1802	908	1889	3409	2283	4014	1806	2199	3466	5417	7633	5264	397	1740	525	1954	1807	4111	1297	1017	3511	3561	1501	3311	2889	2222	3160	7035	560	1359	2472	2359
TCF12	171	359	364	797	921	290	672	580	757	361	206	224	305	218	473	948	535	477	161	586	1120	744	1358	575	670	1005	2074	2969	1754	128	520	192	619	715	1447	338	237	1290	1110	485	1081	881	678	1118	2387	166	460	743	841
TCF3	1041	1029	781	3262	2515	778	1716	1890	5103	875	958	1734	2090	705	1933	3392	1676	1583	913	1927	3000	1973	3290	1170	1523	3309	2691	4346	4318	346	1519	421	1810	1442	3482	1248	1115	3504	2830	1031	2262	3922	1624	2596	5966	510	1172	2346	1861
TEAD1	371	569	598	941	1342	551	819	857	1635	532	399	465	636	294	777	1081	800	778	399	627	1694	928	1927	886	1104	1700	1760	2182	2325	370	989	463	1138	975	1947	526	432	1245	1766	640	1284	1182	1303	1540	2446	313	523	1111	945
TEAD2	237	327	378	541	771	337	525	488	1113	311	235	273	348	191	472	648	527	465	259	380	1006	540	939	466	633	924	734	1045	1383	287	604	339	630	545	942	374	299	691	1025	333	676	699	819	793	1443	266	360	668	534
TEAD4	589	1057	875	1994	3207	1005	1502	1887	5748	1063	604	752	1140	450	1266	2246	1175	1273	512	1059	2492	1440	3812	1352	1736	2533	2787	3887	5027	409	1789	435	1957	1529	4084	680	588	2476	3062	1171	2302	2481	2230	2980	4795	461	876	1872	1636
TFDP1	1161	608	329	1961	1164	407	1024	1110	2657	293	2003	2783	3030	1291	2620	2924	1574	1560	1248	1799	2291	1378	1102	422	737	2847	642	1064	1932	196	1031	219	926	517	1074	1210	1185	2097	1083	417	813	2513	934	885	3434	253	784	1559	788
USF2	1012	1116	616	7384	2273	712	1510	2032	3724	596	807	1346	1601	571	1417	2606	1507	1429	772	1456	2559	1354	2968	864	1324	2946	1435	2328	3084	354	1298	325	1656	1232	3043	1075	984	2145	2205	684	1737	5310	1185	2209	4403	486	1104	2344	1535
ZEB2	715	848	553	2269	1702	584	1143	1341	3372	550	682	1028	1212	519	1326	2158	1162	1101	627	1125	2069	1301	2347	837	1072	2074	1549	2308	2753	252	1104	304	1407	1047	2603	867	778	2020	1855	628	1432	2779	1263	1886	3738	320	838	1517	1228
[truncated: 24 more columns]
