# Supplementary material for: Systematic analysis of naturally occurring insertions and deletions that alter transcription factor spacing identifies tolerant and sensitive transcription factor pairs
Source: eLife. 2022 Jan 20;11:e70878. doi: 10.7554/eLife.70878 (PMC8809895; doi:10.7554/eLife.70878)
Supplement: Figure 3—source data 1. [file elife-70878-fig3-data1.csv]

strain	group	Log2 PU1 fold change	Change of PWM score or spacing
BALB	mutated PU.1 motif	1.4502887580113475	3.3483290000000014
BALB	mutated PU.1 motif	-0.4473576808846955	-3.639792
BALB	mutated PU.1 motif	-4.22549012432383	-4.719585999999998
BALB	mutated PU.1 motif	-2.2318072070877726	-5.4834369999999995
BALB	mutated PU.1 motif	-5.01575718567557	-6.5480979999999995
BALB	mutated PU.1 motif	-1.164209269759339	-3.0432159999999975
BALB	mutated PU.1 motif	-3.211088850673469	-6.658211400000002
BALB	mutated PU.1 motif	7.211066143005678	6.658213
BALB	mutated PU.1 motif	3.3103062985952723	3.7944226
BALB	mutated PU.1 motif	-0.4370295838459679	-2.4774650000000005
BALB	mutated PU.1 motif	1.848843142890562	3.4529404999999986
BALB	mutated PU.1 motif	4.633551771786287	3.6397924999999995
BALB	mutated PU.1 motif	1.4231732828593193	2.3197829999999993
BALB	mutated PU.1 motif	4.09962637990585	2.1461360000000003
BALB	mutated PU.1 motif	3.999883698958067	2.057546500000001
BALB	mutated PU.1 motif	-2.6364413116091705	-6.020700999999997
BALB	mutated PU.1 motif	-1.8221604491350414	-3.6212190000000017
BALB	mutated PU.1 motif	-1.3190389833307385	-3.1658299999999997
BALB	mutated PU.1 motif	-1.53394748008719	-3.7140379999999986
BALB	mutated PU.1 motif	-1.7817867663981684	-3.5432360000000003
BALB	mutated PU.1 motif	3.31529881250074	3.8131717000000016
BALB	mutated PU.1 motif	0.8861907760413184	3.6805290000000017
BALB	mutated PU.1 motif	-5.10212457728211	-8.3822802
BALB	mutated PU.1 motif	-1.6621035011663334	-3.452940999999999
BALB	mutated PU.1 motif	3.0920605529887677	2.3176184000000006
BALB	mutated PU.1 motif	-0.4894651125254663	-2.1069770000000005
BALB	mutated PU.1 motif	5.702380501615525	6.658211999999997
BALB	mutated PU.1 motif	0.7284887554948503	2.1178880000000007
BALB	mutated PU.1 motif	3.74918405199251	6.548099
BALB	mutated PU.1 motif	-3.5887090675776907	-4.411154299999999
BALB	mutated PU.1 motif	-5.537411934818037	-2.4774645
BALB	mutated PU.1 motif	4.49481047265	2.2419469999999997
BALB	mutated PU.1 motif	-4.835166157220454	-6.947585699999999
BALB	mutated PU.1 motif	0.5210144563261734	3.6397924999999987
BALB	mutated PU.1 motif	-2.8333720372366793	-6.546352999999998
BALB	mutated PU.1 motif	-0.07280777853094289	2.144004
BALB	mutated PU.1 motif	-0.05120638210505479	2.8743039999999986
BALB	mutated PU.1 motif	3.8949083694891415	3.639792
BALB	mutated PU.1 motif	5.522926080762407	5.276900000000001
BALB	mutated PU.1 motif	-0.6739837636425463	-3.348328000000002
BALB	mutated PU.1 motif	-3.02156125710046	-3.3483300000000007
BALB	mutated PU.1 motif	0.7107787173827669	3.639791599999999
BALB	mutated PU.1 motif	2.779688619024112	2.756804700000001
BALB	mutated PU.1 motif	-2.8557353844284963	-3.4529414999999988
BALB	mutated PU.1 motif	-2.39363853184903	-2.4059363000000005
BALB	mutated PU.1 motif	-4.486872654958753	-5.137747999999998
BALB	mutated PU.1 motif	5.7955851451180616	6.548099000000001
BALB	mutated PU.1 motif	-1.2730184944064167	-3.461973999999998
BALB	mutated PU.1 motif	3.876958896069571	3.680529
BALB	mutated PU.1 motif	-1.3513394255968638	-4.374306600000001
BALB	mutated PU.1 motif	1.443871972580765	3.348329999999999
BALB	mutated PU.1 motif	-2.393630048234007	-4.723737000000002
BALB	mutated PU.1 motif	5.009866436230182	6.6582116
BALB	mutated PU.1 motif	4.435078928996495	4.478171000000001
BALB	mutated PU.1 motif	3.063069365024762	4.671308999999999
BALB	mutated PU.1 motif	4.055748577857092	4.802497000000001
BALB	mutated PU.1 motif	-2.1494545170975714	-2.6221460000000008
BALB	mutated PU.1 motif	-0.6492773142028696	-3.639792
BALB	mutated PU.1 motif	-2.9277539886002617	-3.5799319999999986
BALB	mutated PU.1 motif	-4.451955358743644	-3.639792
BALB	mutated PU.1 motif	-1.1394059030054215	-3.680529
BALB	mutated PU.1 motif	3.7274334987768127	6.447458
BALB	mutated PU.1 motif	-3.9949689023456108	-2.019154000000002
BALB	mutated PU.1 motif	-4.60298552224653	-6.658210000000002
BALB	mutated PU.1 motif	-1.1586360623098213	-4.4018926
BALB	mutated PU.1 motif	1.235114969946535	-3.1723800000000004
BALB	mutated PU.1 motif	-2.6865580092718604	-2.8100933999999986
BALB	mutated PU.1 motif	2.321037267417941	2.9468330000000007
BALB	mutated PU.1 motif	2.9116847444712866	3.452942
BALB	mutated PU.1 motif	1.4868281823468537	3.9654370000000005
BALB	mutated PU.1 motif	-2.522386551682673	-3.6805290000000017
BALB	mutated PU.1 motif	-0.9542855189061221	-3.452941000000001
BALB	mutated C/EBPβ motif	0.24066006549061392	4.9726624
BALB	mutated C/EBPβ motif	2.7560018105844244	3.5333395999999997
BALB	mutated C/EBPβ motif	-4.22549012432383	-2.6088319999999996
BALB	mutated C/EBPβ motif	1.8542558970266318	3.3673162000000003
BALB	mutated C/EBPβ motif	-3.517298112887138	-9.2291512
BALB	mutated C/EBPβ motif	-0.20366318989916188	-2.6877150000000003
BALB	mutated C/EBPβ motif	-1.3433594754188736	-2.6088316999999996
BALB	mutated C/EBPβ motif	0.21858750913301783	-6.3597413
BALB	mutated C/EBPβ motif	-2.270082073823678	-6.173249
BALB	mutated C/EBPβ motif	-0.07438247050748359	-3.4783269999999993
BALB	mutated C/EBPβ motif	0.0677424926374286	6.207037639999999
BALB	mutated C/EBPβ motif	-2.4218106326680875	-6.3597409
BALB	mutated C/EBPβ motif	-0.08408809864975897	-6.546658549999999
BALB	mutated C/EBPβ motif	-1.5401638912036368	2.608831500000001
BALB	mutated C/EBPβ motif	-1.9476128078295538	-3.2785914000000003
BALB	mutated C/EBPβ motif	-0.005662206435937733	-5.980286800000001
BALB	mutated C/EBPβ motif	-1.6427853691659342	-6.190177500000001
BALB	mutated C/EBPβ motif	-0.17028768941801342	6.546658559999999
BALB	mutated C/EBPβ motif	2.9801696491348357	2.3638303999999994
BALB	mutated C/EBPβ motif	0.3966495371629346	7.5850017
BALB	mutated C/EBPβ motif	-0.7532156823497225	-4.1944405
BALB	mutated C/EBPβ motif	-0.39153842037128683	-5.171652300000001
BALB	mutated C/EBPβ motif	2.051973022556331	2.2161077999999996
BALB	mutated C/EBPβ motif	-1.4528068120831819	-2.2338369999999994
BALB	mutated C/EBPβ motif	-0.25809173551272924	-3.2218736000000003
BALB	mutated C/EBPβ motif	-0.7642378811875554	-4.760397
BALB	mutated C/EBPβ motif	0.1609405242468389	3.2218730000000004
BALB	mutated C/EBPβ motif	0.7616465200750877	2.6088317000000014
BALB	mutated C/EBPβ motif	4.205780215910162	3.6435873999999995
BALB	mutated C/EBPβ motif	0.7284887554948503	-6.4947766
BALB	mutated C/EBPβ motif	-0.2712300292506544	2.2493109999999987
BALB	mutated C/EBPβ motif	0.1833091686287096	3.270728
BALB	mutated C/EBPβ motif	0.11143420769807388	3.4783275000000002
BALB	mutated C/EBPβ motif	-0.048230065305060243	-2.6088322999999995
BALB	mutated C/EBPβ motif	0.774021107815531	6.494776700000001
BALB	mutated C/EBPβ motif	-0.2829452831371091	-3.270726
BALB	mutated C/EBPβ motif	4.49481047265	5.3170098
BALB	mutated C/EBPβ motif	-0.062440871536397324	-2.4920790000000004
BALB	mutated C/EBPβ motif	0.8814864520698675	2.6088310000000003
BALB	mutated C/EBPβ motif	-0.07280777853094289	-3.270726500000001
BALB	mutated C/EBPβ motif	-2.1413023236078406	-3.2218739999999997
BALB	mutated C/EBPβ motif	1.2574934478761555	5.8454045
BALB	mutated C/EBPβ motif	-0.10912560780464631	2.1253249999999992
BALB	mutated C/EBPβ motif	0.49096130341837263	3.2218735999999986
BALB	mutated C/EBPβ motif	-4.443986785064416	-5.4344149999999996
BALB	mutated C/EBPβ motif	-0.3184466945638942	6.3597415
BALB	mutated C/EBPβ motif	-3.7567917361187115	-6.4734184
BALB	mutated C/EBPβ motif	1.812018182815542	6.5004499
BALB	mutated C/EBPβ motif	-2.287607390478898	-3.9316824000000006
BALB	mutated C/EBPβ motif	-1.6703650139779058	-3.221873
BALB	mutated C/EBPβ motif	-4.045982990709456	-8.0729638
BALB	mutated C/EBPβ motif	-0.1638191689858175	-3.2218740000000006
BALB	mutated C/EBPβ motif	-1.8373051181346582	-3.0764839999999993
BALB	mutated C/EBPβ motif	-5.293202298725326	-6.494776999999999
BALB	mutated C/EBPβ motif	2.6731932924146706	2.2449390000000005
BALB	mutated C/EBPβ motif	-0.3911345274683704	-4.029643
BALB	mutated C/EBPβ motif	3.876958896069571	2.1053504
BALB	mutated C/EBPβ motif	0.5035281545489019	3.221873000000002
BALB	mutated C/EBPβ motif	-2.5849625007211565	-6.494777
BALB	mutated C/EBPβ motif	3.0058868430769143	3.0508294000000014
BALB	mutated C/EBPβ motif	-0.33837675043039095	2.608831999999998
BALB	mutated C/EBPβ motif	-0.5591878635655378	-4.791602999999999
BALB	mutated C/EBPβ motif	-0.8761031477977026	-3.2218729999999987
BALB	mutated C/EBPβ motif	-0.45372641653436574	2.608831000000002
BALB	mutated C/EBPβ motif	4.169230295866752	5.0012175
BALB	mutated C/EBPβ motif	0.4317239568783693	-4.703658000000003
BALB	mutated C/EBPβ motif	-3.788965496624861	-5.1392338
BALB	mutated C/EBPβ motif	1.1325736359719918	2.435802
BALB	mutated C/EBPβ motif	0.3310896693520391	-2.5206802999999987
BALB	mutated C/EBPβ motif	-0.06568900357946639	2.4678414
BALB	mutated C/EBPβ motif	-0.4335979938313832	-6.494776
BALB	mutated C/EBPβ motif	2.3294259463324023	3.221873499999999
BALB	mutated C/EBPβ motif	2.317493969602978	6.4667393
BALB	mutated C/EBPβ motif	0.6826184251155487	3.2218740000000015
BALB	mutated C/EBPβ motif	0.02972405778171261	3.2218737000000006
BALB	mutated C/EBPβ motif	3.1492623925988124	2.6088322999999987
BALB	mutated C/EBPβ motif	-0.6401281156709642	-9.098437
BALB	mutated C/EBPβ motif	-0.4949711286356404	-3.0084496
BALB	mutated C/EBPβ motif	-0.8185998910603631	-3.941857500000001
BALB	mutated C/EBPβ motif	-0.414103688575155	-3.799822999999999
BALB	mutated C/EBPβ motif	-0.6513104839621784	-2.6088320000000014
BALB	mutated C/EBPβ motif	-0.56881836098324	2.2239649999999997
BALB	mutated MAGGIE motif	-1.7687713041778204	-8.467648
BALB	mutated MAGGIE motif	-0.47620876330941275	2.8869023000000005
BALB	mutated MAGGIE motif	-0.15798827886785283	-3.7560998000000003
BALB	mutated MAGGIE motif	-4.162532318241457	-4.3792084
BALB	mutated MAGGIE motif	-0.6997954318509993	-4.5539952
BALB	mutated MAGGIE motif	-4.192998636341638	-6.6384478
BALB	mutated MAGGIE motif	1.016257941414064	2.0455380000000005
BALB	mutated MAGGIE motif	1.4502887580113475	5.861530999999999
BALB	mutated MAGGIE motif	-1.2884027953807022	-3.0260949999999998
BALB	mutated MAGGIE motif	-1.164607284249918	-5.02135343
BALB	mutated MAGGIE motif	-0.4473576808846955	-3.909256000000001
BALB	mutated MAGGIE motif	-0.3330139882905483	6.658211000000001
BALB	mutated MAGGIE motif	0.5538756422146767	5.507973
BALB	mutated MAGGIE motif	-0.4339287093143609	-2.220936
BALB	mutated MAGGIE motif	0.24066006549061392	5.574779
BALB	mutated MAGGIE motif	0.8189060075812291	-4.0346937
BALB	mutated MAGGIE motif	2.7560018105844244	-5.7984683
BALB	mutated MAGGIE motif	0.12326016224888026	3.8255775000000005
BALB	mutated MAGGIE motif	-0.2615051465326417	2.576338
BALB	mutated MAGGIE motif	-5.809712909573899	6.6582110000000005
BALB	mutated MAGGIE motif	-4.22549012432383	-5.96705
BALB	mutated MAGGIE motif	-0.28117475295867855	3.424434999999999
BALB	mutated MAGGIE motif	-2.845644921326241	6.538054
BALB	mutated MAGGIE motif	0.7792888123046353	-5.537061900000001
BALB	mutated MAGGIE motif	-0.4444679093159909	-7.85442617
BALB	mutated MAGGIE motif	2.3440761356492805	-2.8804182999999988
BALB	mutated MAGGIE motif	1.8542558970266318	-5.3786932
BALB	mutated MAGGIE motif	-3.517298112887138	-9.0104149
BALB	mutated MAGGIE motif	-0.20366318989916188	3.0856600999999992
BALB	mutated MAGGIE motif	0.15932105768450366	-3.7095026999999994
BALB	mutated MAGGIE motif	-0.5775169044381103	-3.9341123
BALB	mutated MAGGIE motif	-1.3433594754188736	-5.123425
BALB	mutated MAGGIE motif	-0.4096576482681904	5.452551
BALB	mutated MAGGIE motif	0.21858750913301783	-6.557754000000001
BALB	mutated MAGGIE motif	-0.7489899117691081	-7.198354300000001
BALB	mutated MAGGIE motif	-0.37855341122952435	-6.65821
BALB	mutated MAGGIE motif	-0.36885595646412117	2.7513232000000003
BALB	mutated MAGGIE motif	3.477259963119036	-5.348989999999999
BALB	mutated MAGGIE motif	-2.270082073823678	-6.658211499999999
BALB	mutated MAGGIE motif	0.7357687431265787	-4.738828499999999
BALB	mutated MAGGIE motif	0.299851228882547	6.4393019
BALB	mutated MAGGIE motif	-1.1797736173563047	6.558534999999999
BALB	mutated MAGGIE motif	-0.07438247050748359	-3.5480164999999992
BALB	mutated MAGGIE motif	-0.09314301221495302	5.512724469999999
BALB	mutated MAGGIE motif	2.86058576220902	5.7100286
BALB	mutated MAGGIE motif	-0.9767645518097856	-6.273413
BALB	mutated MAGGIE motif	0.0459399377109273	-2.2473335000000008
BALB	mutated MAGGIE motif	0.0677424926374286	6.1317076
BALB	mutated MAGGIE motif	-1.8055145424364731	-10.308457
BALB	mutated MAGGIE motif	-5.01575718567557	-6.658211000000002
BALB	mutated MAGGIE motif	-2.4218106326680875	-6.5577548000000006
BALB	mutated MAGGIE motif	-1.2398189443284924	4.4198307
BALB	mutated MAGGIE motif	-1.164209269759339	-6.379494000000001
BALB	mutated MAGGIE motif	-0.5205227392754912	-5.838636800000001
BALB	mutated MAGGIE motif	-3.211088850673469	-4.7878714
BALB	mutated MAGGIE motif	-0.2767539924736786	-3.180698399999999
BALB	mutated MAGGIE motif	-0.5291798005621118	-6.658212
BALB	mutated MAGGIE motif	-0.4965673847754424	6.438197400000001
BALB	mutated MAGGIE motif	0.20106655535222195	-4.789187000000002
BALB	mutated MAGGIE motif	-0.2917564344788266	-6.589430000000001
BALB	mutated MAGGIE motif	-0.5934593286540633	-3.2626264
BALB	mutated MAGGIE motif	-1.421794865454153	-3.5367295999999993
BALB	mutated MAGGIE motif	-0.5016492062020665	-3.363454
BALB	mutated MAGGIE motif	-0.08408809864975897	-6.55775453
BALB	mutated MAGGIE motif	0.12554215062985374	5.24869215
BALB	mutated MAGGIE motif	-0.45039835416897844	-6.077688800000001
BALB	mutated MAGGIE motif	-0.633973509223269	-2.0203275000000005
BALB	mutated MAGGIE motif	-0.4845797998786381	3.3211330999999995
BALB	mutated MAGGIE motif	0.4794631260216704	-2.4222445000000006
BALB	mutated MAGGIE motif	7.211066143005678	6.8539669000000005
BALB	mutated MAGGIE motif	-1.5401638912036368	3.025498699999999
BALB	mutated MAGGIE motif	4.445858107764681	4.832247999999999
BALB	mutated MAGGIE motif	-0.4370295838459679	4.534568999999999
BALB	mutated MAGGIE motif	-1.907670028620271	3.6913783
BALB	mutated MAGGIE motif	-0.009558030164765974	2.5484514000000007
BALB	mutated MAGGIE motif	-1.1892824523893206	-6.044394100000001
BALB	mutated MAGGIE motif	-0.4396037978134446	-5.348990000000001
BALB	mutated MAGGIE motif	0.2466734339270129	3.5347197899999996
BALB	mutated MAGGIE motif	1.848843142890562	2.6955790000000004
BALB	mutated MAGGIE motif	3.15506091940115	6.1582558
BALB	mutated MAGGIE motif	-1.119648466588921	3.9253607
BALB	mutated MAGGIE motif	-0.4211122209644689	-5.8593115000000004
BALB	mutated MAGGIE motif	-0.34860357507735085	3.5516474700000003
BALB	mutated MAGGIE motif	-0.11537240467399368	-4.196992400000001
BALB	mutated MAGGIE motif	-1.5002978195052465	-4.983704
BALB	mutated MAGGIE motif	-0.2919423683068967	-6.4591
BALB	mutated MAGGIE motif	-0.9706906094793712	-5.3031415
BALB	mutated MAGGIE motif	-0.03891195954539217	4.3347885
BALB	mutated MAGGIE motif	4.633551771786287	3.9747462000000002
BALB	mutated MAGGIE motif	0.3784072446445439	6.538055699999999
BALB	mutated MAGGIE motif	-0.8537455410794275	-3.4954494999999994
BALB	mutated MAGGIE motif	-0.9370257854766031	6.403317000000001
BALB	mutated MAGGIE motif	0.22357775676429625	-6.6582114
BALB	mutated MAGGIE motif	-0.19150741542819372	-3.46681565
BALB	mutated MAGGIE motif	0.4814950103367108	-2.132179599999998
BALB	mutated MAGGIE motif	1.4231732828593193	3.989890000000001
BALB	mutated MAGGIE motif	0.5950270252499665	4.162468400000001
BALB	mutated MAGGIE motif	0.8898696764247553	-2.735699200000001
BALB	mutated MAGGIE motif	-0.28602418145070896	-5.0787059999999995
BALB	mutated MAGGIE motif	-4.5383296419660955	5.600517700000001
BALB	mutated MAGGIE motif	4.09962637990585	-5.070519400000001
BALB	mutated MAGGIE motif	-1.6232801662259844	-5.9302902999999985
BALB	mutated MAGGIE motif	-1.9476128078295538	-3.4379142000000007
BALB	mutated MAGGIE motif	-0.09016643098031629	-3.233024
BALB	mutated MAGGIE motif	0.09876585238261626	-2.6863180499999997
BALB	mutated MAGGIE motif	0.9794898422526321	5.2039875
BALB	mutated MAGGIE motif	0.06392000510652629	4.430996000000001
BALB	mutated MAGGIE motif	-1.6648677942802177	-4.676914299999998
BALB	mutated MAGGIE motif	-0.24065281241218628	-2.6933277
BALB	mutated MAGGIE motif	-1.028022621059975	-2.3169905999999996
BALB	mutated MAGGIE motif	-2.6364413116091705	4.5027206
BALB	mutated MAGGIE motif	0.030068617631505923	5.7378727
BALB	mutated MAGGIE motif	-1.8221604491350414	-6.724964
BALB	mutated MAGGIE motif	-0.005662206435937733	-6.486668900000001
BALB	mutated MAGGIE motif	-1.371184303913069	-3.2620397
BALB	mutated MAGGIE motif	-1.381731412661665	6.398030400000001
BALB	mutated MAGGIE motif	-3.492485124708292	3.659609
BALB	mutated MAGGIE motif	-1.6427853691659342	-6.658211
BALB	mutated MAGGIE motif	3.5632941388269073	6.658212000000001
BALB	mutated MAGGIE motif	0.2814615033804322	6.6582114
BALB	mutated MAGGIE motif	-0.17028768941801342	6.557754480000001
BALB	mutated MAGGIE motif	-0.0942753304113726	-6.658211400000001
BALB	mutated MAGGIE motif	0.09334690460452766	-5.6648753
BALB	mutated MAGGIE motif	2.9801696491348357	4.0986898
BALB	mutated MAGGIE motif	0.3966495371629346	7.703714
BALB	mutated MAGGIE motif	0.6963757857611927	-6.0443940000000005
BALB	mutated MAGGIE motif	-1.53394748008719	-4.9494566
BALB	mutated MAGGIE motif	-0.3960081966773572	5.508784100000001
BALB	mutated MAGGIE motif	1.1983188057160774	2.1723532
BALB	mutated MAGGIE motif	-0.7532156823497225	4.7874087
BALB	mutated MAGGIE motif	1.1175323974604834	2.788496
BALB	mutated MAGGIE motif	-0.39153842037128683	-5.741555
BALB	mutated MAGGIE motif	-0.5438283970252975	2.605727999999999
BALB	mutated MAGGIE motif	2.2650335876416214	5.8174167
BALB	mutated MAGGIE motif	-0.25223633346858243	-2.558449200000001
BALB	mutated MAGGIE motif	1.0731664125619718	-3.271318
BALB	mutated MAGGIE motif	-2.566007225061301	-6.398030400000001
BALB	mutated MAGGIE motif	-3.8921340714381465	-8.427052619999998
BALB	mutated MAGGIE motif	-0.5515814101665537	-5.163279999999999
BALB	mutated MAGGIE motif	1.1298451929792832	6.6384485
BALB	mutated MAGGIE motif	1.4128107085050035	-2.7218001
BALB	mutated MAGGIE motif	2.051973022556331	-5.772791999999999
BALB	mutated MAGGIE motif	-0.7953389815712884	-6.8857023
BALB	mutated MAGGIE motif	-0.18444758350273016	-2.061840299999999
BALB	mutated MAGGIE motif	-1.4528068120831819	-3.3915823975
BALB	mutated MAGGIE motif	0.8861907760413184	-4.062269199999999
BALB	mutated MAGGIE motif	0.3779614812316714	-5.654173400000001
BALB	mutated MAGGIE motif	-1.6403995264839004	-3.5730300000000006
BALB	mutated MAGGIE motif	-5.10212457728211	-5.5896604
BALB	mutated MAGGIE motif	-3.026420400122597	-4.015895
BALB	mutated MAGGIE motif	0.18297530753858293	-6.0024764
BALB	mutated MAGGIE motif	-0.25809173551272924	5.212556599999999
BALB	mutated MAGGIE motif	-0.7642378811875554	-4.567303
BALB	mutated MAGGIE motif	-0.21092459321930423	-3.8102410000000004
BALB	mutated MAGGIE motif	-0.12967222556987767	-2.073614400000002
BALB	mutated MAGGIE motif	0.251323695144241	-4.0514701
BALB	mutated MAGGIE motif	-1.6621035011663334	-2.096528
BALB	mutated MAGGIE motif	0.1609405242468389	3.3735660000000003
BALB	mutated MAGGIE motif	3.0920605529887677	-5.0429425
BALB	mutated MAGGIE motif	-0.6218727427138173	6.6384485
BALB	mutated MAGGIE motif	-0.3630783803732731	6.06866152
BALB	mutated MAGGIE motif	0.06134634081605661	3.7773529999999997
BALB	mutated MAGGIE motif	-0.25147230096548157	3.6022776400000005
BALB	mutated MAGGIE motif	-2.4460258707415847	-4.511947299999999
BALB	mutated MAGGIE motif	-0.8634994589550766	-3.6447567000000007
BALB	mutated MAGGIE motif	-0.8742803946454307	3.24950197
BALB	mutated MAGGIE motif	0.7616465200750877	3.0041597000000015
BALB	mutated MAGGIE motif	5.702380501615525	-6.007631999999999
BALB	mutated MAGGIE motif	3.631693551066147	6.658211999999999
BALB	mutated MAGGIE motif	4.205780215910162	-3.2817639
BALB	mutated MAGGIE motif	-0.597649628582114	-4.657859
BALB	mutated MAGGIE motif	2.6102383612083235	4.994738600000001
BALB	mutated MAGGIE motif	0.1855647239657312	-3.88587651
BALB	mutated MAGGIE motif	0.7284887554948503	-6.5577542
BALB	mutated MAGGIE motif	-0.6413846499349916	-4.242896399999999
BALB	mutated MAGGIE motif	-0.46303805758113903	2.6022885000000002
BALB	mutated MAGGIE motif	0.8857073055389204	6.364803200000001
BALB	mutated MAGGIE motif	0.06729458911177488	-4.430359799999999
BALB	mutated MAGGIE motif	-0.6501806226387457	4.755120400000001
BALB	mutated MAGGIE motif	3.74918405199251	6.658212000000001
BALB	mutated MAGGIE motif	-0.13892941815247806	3.1963954
BALB	mutated MAGGIE motif	-0.28612104683223105	4.306351999999999
BALB	mutated MAGGIE motif	-1.2769384973422504	-6.688438
BALB	mutated MAGGIE motif	-1.5710064543724371	-2.8197915999999985
BALB	mutated MAGGIE motif	-3.4419864841778884	3.2194227999999994
BALB	mutated MAGGIE motif	-0.2712300292506544	2.162127999999999
BALB	mutated MAGGIE motif	0.1833091686287096	-6.638448499999998
BALB	mutated MAGGIE motif	-0.06993291669276314	-3.429291
BALB	mutated MAGGIE motif	1.4569360375948683	-4.8354723
BALB	mutated MAGGIE motif	-0.21804359646672733	6.274853499999998
BALB	mutated MAGGIE motif	-0.36192495347810816	-4.434980400000001
BALB	mutated MAGGIE motif	0.11143420769807388	3.5480156000000003
BALB	mutated MAGGIE motif	0.8460873165463183	4.434980599999999
BALB	mutated MAGGIE motif	0.3470918624623538	-3.8638713
BALB	mutated MAGGIE motif	1.5997029296244403	-3.0726940000000003
BALB	mutated MAGGIE motif	0.886900307270027	5.7415447
BALB	mutated MAGGIE motif	-1.2470408832563704	-2.2758127000000004
BALB	mutated MAGGIE motif	-1.1010176225113026	-5.648285699999999
BALB	mutated MAGGIE motif	0.30908419897006656	-3.6022137
BALB	mutated MAGGIE motif	2.2309369487506037	6.4194749
BALB	mutated MAGGIE motif	-0.21331387265298662	-5.102094600000001
BALB	mutated MAGGIE motif	-0.26624793404477654	3.2772564500000003
BALB	mutated MAGGIE motif	-0.672978659439555	-2.3071289999999998
BALB	mutated MAGGIE motif	0.3661077902887797	4.371864700000001
BALB	mutated MAGGIE motif	-0.1662898758778537	-3.4954020000000003
BALB	mutated MAGGIE motif	0.023020863307473327	5.32094956
BALB	mutated MAGGIE motif	0.03020970070123319	-6.1483656
BALB	mutated MAGGIE motif	1.5673200302871626	6.3794937
BALB	mutated MAGGIE motif	-0.0892759051443397	-4.363149
BALB	mutated MAGGIE motif	-0.048230065305060243	-6.71440104
BALB	mutated MAGGIE motif	-0.15537916853819933	-3.7286417000000007
BALB	mutated MAGGIE motif	-3.5887090675776907	-3.9047178
BALB	mutated MAGGIE motif	-5.537411934818037	-6.07398953
BALB	mutated MAGGIE motif	0.3793783670712614	3.2278330000000004
BALB	mutated MAGGIE motif	-1.3087377233424258	2.7799924000000003
BALB	mutated MAGGIE motif	0.9679225394497575	-3.9341125000000003
BALB	mutated MAGGIE motif	-0.1266004101260565	-6.611762000000001
BALB	mutated MAGGIE motif	0.2610709827084996	-3.6428632000000007
BALB	mutated MAGGIE motif	-0.023878233938715354	5.622728
BALB	mutated MAGGIE motif	0.774021107815531	6.658211700000001
BALB	mutated MAGGIE motif	-0.2829452831371091	-4.522102299999999
BALB	mutated MAGGIE motif	4.49481047265	4.9593908
BALB	mutated MAGGIE motif	0.3358246609485418	-4.9579
BALB	mutated MAGGIE motif	-6.337755798213607e-05	-4.810726599999999
BALB	mutated MAGGIE motif	-1.5244865720148875	-3.8427046999999996
BALB	mutated MAGGIE motif	-0.11320895095419115	5.523687300000001
BALB	mutated MAGGIE motif	0.08066779801540669	-4.179852700000001
BALB	mutated MAGGIE motif	-0.11725485479200692	4.9999553
BALB	mutated MAGGIE motif	0.13988888345985018	-6.100443100000001
BALB	mutated MAGGIE motif	-0.062440871536397324	-4.429559499999999
BALB	mutated MAGGIE motif	-1.4132426729282495	-5.64324723
BALB	mutated MAGGIE motif	-4.835166157220454	-2.3532925000000002
BALB	mutated MAGGIE motif	0.5210144563261734	-4.610434950000001
BALB	mutated MAGGIE motif	0.8814864520698675	3.5995918000000002
BALB	mutated MAGGIE motif	-1.5580502220232297	-2.605029
BALB	mutated MAGGIE motif	-0.1634879172928123	-2.880418500000001
BALB	mutated MAGGIE motif	-2.8333720372366793	-6.183650500000001
BALB	mutated MAGGIE motif	1.2568381398698882	-2.6669079999999994
BALB	mutated MAGGIE motif	-0.0611634893322881	2.1417525
BALB	mutated MAGGIE motif	-0.07280777853094289	6.63844892
BALB	mutated MAGGIE motif	-0.02111847394317312	2.732358800000001
BALB	mutated MAGGIE motif	-0.20934445379361222	-2.948816700000001
BALB	mutated MAGGIE motif	0.9133618543996151	-4.2194305
BALB	mutated MAGGIE motif	-0.31512858649996556	-4.19671335
BALB	mutated MAGGIE motif	-0.25182895112591286	-4.7492908
BALB	mutated MAGGIE motif	-1.132822460359749	2.1286120000000004
BALB	mutated MAGGIE motif	-2.1413023236078406	-4.9751916
BALB	mutated MAGGIE motif	-3.5957627835376416	-6.6582116000000005
BALB	mutated MAGGIE motif	0.2562047000563039	2.8814966
BALB	mutated MAGGIE motif	1.2574934478761555	5.8952186
BALB	mutated MAGGIE motif	-0.025581184297279513	-3.7940774000000013
BALB	mutated MAGGIE motif	0.6577007964626933	-2.9670569999999996
BALB	mutated MAGGIE motif	-0.10912560780464631	2.3681405999999994
BALB	mutated MAGGIE motif	-0.05120638210505479	5.0842929
BALB	mutated MAGGIE motif	0.25212115351315045	5.853796
BALB	mutated MAGGIE motif	0.49096130341837263	3.3735657000000003
BALB	mutated MAGGIE motif	0.9321469078175575	3.2426974
BALB	mutated MAGGIE motif	0.60114480950417	2.0767760000000006
BALB	mutated MAGGIE motif	-0.04463807392732466	-4.9660096000000005
BALB	mutated MAGGIE motif	-0.08335994797327029	6.05525086
BALB	mutated MAGGIE motif	3.80260313171682	4.0262587
BALB	mutated MAGGIE motif	-4.443986785064416	-6.426442999999999
BALB	mutated MAGGIE motif	5.522926080762407	6.658211999999999
BALB	mutated MAGGIE motif	-0.6739837636425463	-5.861530599999998
BALB	mutated MAGGIE motif	-0.46644351599267075	4.5461879000000005
BALB	mutated MAGGIE motif	-0.06614148689892829	5.0903152999999985
BALB	mutated MAGGIE motif	2.898595816876797	-3.7441807000000003
BALB	mutated MAGGIE motif	-2.3269847286786716	5.472406999999999
BALB	mutated MAGGIE motif	0.24183262756992807	2.5890109999999997
BALB	mutated MAGGIE motif	1.7341644641957448	5.384015499999999
BALB	mutated MAGGIE motif	0.7107787173827669	-4.423942000000001
BALB	mutated MAGGIE motif	3.3800014398809877	5.287428900000001
BALB	mutated MAGGIE motif	-3.0949385865641794	-6.853966700000001
BALB	mutated MAGGIE motif	-2.1134536315958554	-5.363309000000001
BALB	mutated MAGGIE motif	-1.0305007953945315	-2.8371032699999996
BALB	mutated MAGGIE motif	-0.3184466945638942	6.5577544
BALB	mutated MAGGIE motif	-0.929459691517089	-2.2468015
BALB	mutated MAGGIE motif	-0.7555346518920469	-2.0758446
BALB	mutated MAGGIE motif	2.779688619024112	2.0722975999999997
BALB	mutated MAGGIE motif	-3.7567917361187115	-6.8337117
BALB	mutated MAGGIE motif	-0.5611998090872987	-4.3356725
BALB	mutated MAGGIE motif	-0.06343139111425167	-3.8435813999999997
BALB	mutated MAGGIE motif	1.812018182815542	6.5201712
BALB	mutated MAGGIE motif	0.15474510378995898	5.2874289999999995
BALB	mutated MAGGIE motif	-0.7723292592629001	2.9600622
BALB	mutated MAGGIE motif	2.7539932341395286	-2.3984707999999992
BALB	mutated MAGGIE motif	0.7186415893749931	-3.6960271500000004
BALB	mutated MAGGIE motif	-2.8557353844284963	-6.043804
BALB	mutated MAGGIE motif	0.6142033687577548	4.096094000000001
BALB	mutated MAGGIE motif	0.37664873705270274	-3.18225
BALB	mutated MAGGIE motif	0.6715828517837981	4.1114180000000005
BALB	mutated MAGGIE motif	0.10992563820611423	-4.1429584
BALB	mutated MAGGIE motif	0.30468520142363165	2.2009550000000004
BALB	mutated MAGGIE motif	-3.9924086667945753	-6.1553595
BALB	mutated MAGGIE motif	-0.13700149317620536	-4.25197204
BALB	mutated MAGGIE motif	0.352625782017042	3.4599664999999993
BALB	mutated MAGGIE motif	0.16684014209143605	2.7127184
BALB	mutated MAGGIE motif	-0.38346345736405496	-6.0443937000000005
BALB	mutated MAGGIE motif	0.4318205303767888	-4.417173200000001
BALB	mutated MAGGIE motif	0.9246415168278639	6.658211199999998
BALB	mutated MAGGIE motif	-0.03954917073770137	2.30028999
BALB	mutated MAGGIE motif	-2.287607390478898	4.412454650000001
BALB	mutated MAGGIE motif	-1.6703650139779058	-3.3735662
BALB	mutated MAGGIE motif	-0.2691822994088433	-3.9024422000000003
BALB	mutated MAGGIE motif	-4.045982990709456	-8.6015389
BALB	mutated MAGGIE motif	0.14107897797376268	-3.1420132
BALB	mutated MAGGIE motif	-0.2774330842361037	-4.3138893
BALB	mutated MAGGIE motif	-0.060794786401157985	-2.8371034999999996
BALB	mutated MAGGIE motif	-2.39363853184903	-6.658211999999999
BALB	mutated MAGGIE motif	4.283175407629658	3.9014680000000004
BALB	mutated MAGGIE motif	-0.28607920499881345	-2.9728923000000007
BALB	mutated MAGGIE motif	-0.3507635850178845	-5.197539
BALB	mutated MAGGIE motif	0.8399508173335688	-5.2093549
BALB	mutated MAGGIE motif	-0.6204862225261154	-5.074528899999999
BALB	mutated MAGGIE motif	-4.486872654958753	3.2742540999999994
BALB	mutated MAGGIE motif	5.7955851451180616	3.99427224
BALB	mutated MAGGIE motif	-0.1638191689858175	-4.5740916
BALB	mutated MAGGIE motif	-0.12486911703924708	3.3447807
BALB	mutated MAGGIE motif	-0.4959930332413931	-5.915853
BALB	mutated MAGGIE motif	-0.7857815101092527	-6.6384487000000005
BALB	mutated MAGGIE motif	0.8050073737016881	6.4900704000000005
BALB	mutated MAGGIE motif	-1.8373051181346582	-6.648149
BALB	mutated MAGGIE motif	-5.293202298725326	-6.5577545
BALB	mutated MAGGIE motif	-1.2730184944064167	-7.419883799999999
BALB	mutated MAGGIE motif	-0.7090011334790383	-5.479445000000002
BALB	mutated MAGGIE motif	-0.7712533559992223	5.5010047
BALB	mutated MAGGIE motif	1.7430499929163932	-4.1893329999999995
BALB	mutated MAGGIE motif	2.6731932924146706	5.084196599999999
BALB	mutated MAGGIE motif	-1.2882950525786212	-9.7338531
BALB	mutated MAGGIE motif	-0.620229130846067	3.9828447000000002
BALB	mutated MAGGIE motif	-0.3761154141580825	-2.6777290999999996
BALB	mutated MAGGIE motif	-0.3911345274683704	-6.3263359999999995
BALB	mutated MAGGIE motif	0.15956044462313113	-4.024714999999999
BALB	mutated MAGGIE motif	0.11569424563258934	2.5226412
BALB	mutated MAGGIE motif	-0.7343504706270885	-2.4822017
BALB	mutated MAGGIE motif	3.876958896069571	6.714401299999999
BALB	mutated MAGGIE motif	0.5064706446797036	6.0997412
BALB	mutated MAGGIE motif	-1.3513394255968638	6.039497499999999
BALB	mutated MAGGIE motif	-0.4599567573520815	2.5849624500000004
BALB	mutated MAGGIE motif	0.5695003203147193	5.0286282
BALB	mutated MAGGIE motif	-1.7375828379262206	-3.945078799999999
BALB	mutated MAGGIE motif	1.443871972580765	5.861529999999999
BALB	mutated MAGGIE motif	0.39746816220819614	5.1554325
BALB	mutated MAGGIE motif	0.10622984075722908	3.5544589999999996
BALB	mutated MAGGIE motif	-2.393630048234007	-6.6582114
BALB	mutated MAGGIE motif	-0.5147499522928811	-3.519727200000001
BALB	mutated MAGGIE motif	0.33232822725360034	-2.9400696
BALB	mutated MAGGIE motif	0.5945253029596738	2.863648999999999
BALB	mutated MAGGIE motif	5.009866436230182	6.658212000000001
BALB	mutated MAGGIE motif	0.45338425180324116	4.3422947
BALB	mutated MAGGIE motif	1.4502571579826773	-3.934112399999999
BALB	mutated MAGGIE motif	-0.12149254483295469	-4.759621000000001
BALB	mutated MAGGIE motif	0.5035281545489019	3.3735669999999995
BALB	mutated MAGGIE motif	1.1714598874545832	5.316067200000001
BALB	mutated MAGGIE motif	-0.10093107181348238	-4.931908099999999
BALB	mutated MAGGIE motif	-0.3273135410239947	4.4295215
BALB	mutated MAGGIE motif	-2.5849625007211565	-6.557754500000001
BALB	mutated MAGGIE motif	0.6784070648402194	3.6276639000000004
BALB	mutated MAGGIE motif	-0.047263711865743296	-3.3571850999999997
BALB	mutated MAGGIE motif	-1.740570753461836	-3.0959694000000004
BALB	mutated MAGGIE motif	3.063069365024762	-6.271826599999999
BALB	mutated MAGGIE motif	3.0058868430769143	2.9752660000000004
BALB	mutated MAGGIE motif	0.13963258526287792	2.4128415999999993
BALB	mutated MAGGIE motif	-2.1494545170975714	-3.5253048999999996
BALB	mutated MAGGIE motif	0.4635318322456188	-2.9613991
BALB	mutated MAGGIE motif	-0.6492773142028696	5.9862719
BALB	mutated MAGGIE motif	-0.33837675043039095	3.4768383000000007
BALB	mutated MAGGIE motif	-0.25915544621405484	-5.3732681
BALB	mutated MAGGIE motif	-0.08556651164271933	-4.186986900000001
BALB	mutated MAGGIE motif	-0.5591878635655378	-4.348095
BALB	mutated MAGGIE motif	0.09879599587731924	5.084196599999999
BALB	mutated MAGGIE motif	2.1500675830971256	-4.4349815
BALB	mutated MAGGIE motif	-0.12278458236316947	-6.127065
BALB	mutated MAGGIE motif	-0.0802028414496263	-6.658211
BALB	mutated MAGGIE motif	-0.6132437343142216	6.568710300000001
BALB	mutated MAGGIE motif	0.07055713624653137	6.5878250000000005
BALB	mutated MAGGIE motif	-0.8761031477977026	-3.373566499999999
BALB	mutated MAGGIE motif	-1.0163003562916604	-6.587824099999999
BALB	mutated MAGGIE motif	-0.3835113921933422	-2.7127184
BALB	mutated MAGGIE motif	-1.0663023703681551	3.2265593
BALB	mutated MAGGIE motif	-1.1703731705685074	-6.546208999999999
BALB	mutated MAGGIE motif	-2.9277539886002617	-4.91803
BALB	mutated MAGGIE motif	-4.451955358743644	-2.7789306
BALB	mutated MAGGIE motif	-0.45372641653436574	3.004159999999999
BALB	mutated MAGGIE motif	-0.016577673784711422	-4.800011100000001
BALB	mutated MAGGIE motif	-1.9629282562704913	2.2168399999999995
BALB	mutated MAGGIE motif	-4.639226542552947	-6.6582113000000005
BALB	mutated MAGGIE motif	-0.2051373912383525	4.852935800000001
BALB	mutated MAGGIE motif	0.7137041650052218	-2.990126
BALB	mutated MAGGIE motif	-1.1394059030054215	-2.6809829999999994
BALB	mutated MAGGIE motif	-0.013691158892375377	9.8960687
BALB	mutated MAGGIE motif	0.9346459254104529	-4.546209559999999
BALB	mutated MAGGIE motif	0.6400415451087635	-5.175444000000001
BALB	mutated MAGGIE motif	4.169230295866752	11.901682000000001
BALB	mutated MAGGIE motif	0.6840750345004816	5.129523900000001
BALB	mutated MAGGIE motif	3.7575084529036245	5.979672000000001
BALB	mutated MAGGIE motif	0.5736790962055576	5.8786793
BALB	mutated MAGGIE motif	-1.288440439578042	-2.1153085999999997
BALB	mutated MAGGIE motif	-0.23656962268823634	5.61988285
BALB	mutated MAGGIE motif	1.017100497022069	-4.5306805
BALB	mutated MAGGIE motif	0.4317239568783693	-5.054759000000001
BALB	mutated MAGGIE motif	-3.788965496624861	-5.6254714
BALB	mutated MAGGIE motif	-0.5247775678650513	-6.6730775
BALB	mutated MAGGIE motif	-2.287902795171516	2.247333000000001
BALB	mutated MAGGIE motif	-0.231490161039952	6.839040700000001
BALB	mutated MAGGIE motif	1.1325736359719918	2.589563400000001
BALB	mutated MAGGIE motif	2.125597560846189	6.4376547
BALB	mutated MAGGIE motif	0.3298963602298661	2.1539728000000005
BALB	mutated MAGGIE motif	-0.53973708061437	-4.5548237
BALB	mutated MAGGIE motif	0.3310896693520391	-5.0742970000000005
BALB	mutated MAGGIE motif	-0.06568900357946639	3.5447138000000002
BALB	mutated MAGGIE motif	-0.029406974158676213	2.09711646
BALB	mutated MAGGIE motif	3.7274334987768127	-5.8763549
BALB	mutated MAGGIE motif	-3.9949689023456108	-5.0783999999999985
BALB	mutated MAGGIE motif	-0.970933201869407	3.850641500000001
BALB	mutated MAGGIE motif	-1.1753456368842476	-8.25193971
BALB	mutated MAGGIE motif	-0.33841999678334655	4.550337799999999
BALB	mutated MAGGIE motif	-0.4335979938313832	6.638448400000001
BALB	mutated MAGGIE motif	-0.14683851113631174	-4.077264999999999
BALB	mutated MAGGIE motif	-1.9604573792995756	-5.377833000000001
BALB	mutated MAGGIE motif	1.2876313998333941	-8.7697004
BALB	mutated MAGGIE motif	-1.077227376416979	-3.040845899999999
BALB	mutated MAGGIE motif	-0.12443180543645749	-6.6384486
BALB	mutated MAGGIE motif	-4.60298552224653	-6.853967000000001
BALB	mutated MAGGIE motif	1.207233717055189	-4.074078100000001
BALB	mutated MAGGIE motif	-1.1586360623098213	9.908984
BALB	mutated MAGGIE motif	0.07597005949209112	6.09487556
BALB	mutated MAGGIE motif	-0.43906756864191987	-2.2927591000000005
BALB	mutated MAGGIE motif	-1.925932458168154	-5.3315569
BALB	mutated MAGGIE motif	1.7507432249481454	-2.165039
BALB	mutated MAGGIE motif	0.21394930006384172	-2.8020298500000007
BALB	mutated MAGGIE motif	-0.21775584909212853	-4.8884988400000005
BALB	mutated MAGGIE motif	-0.20340750776088257	-2.9328850000000006
BALB	mutated MAGGIE motif	2.3294259463324023	3.3735663000000002
BALB	mutated MAGGIE motif	2.317493969602978	6.5388405999999994
BALB	mutated MAGGIE motif	-0.3917524606888616	-3.1954320000000003
BALB	mutated MAGGIE motif	-0.26963785175982924	-2.7646409999999992
BALB	mutated MAGGIE motif	-0.7335584180595607	-4.431505000000001
BALB	mutated MAGGIE motif	0.6826184251155487	6.584962599999999
BALB	mutated MAGGIE motif	-2.6865580092718604	-3.671552000000001
BALB	mutated MAGGIE motif	-2.8542740522411107	-4.84952292
BALB	mutated MAGGIE motif	-0.6656442550721184	-4.822779000000001
BALB	mutated MAGGIE motif	0.02972405778171261	3.3735661
BALB	mutated MAGGIE motif	5.4075038265934365	4.406492999999999
BALB	mutated MAGGIE motif	-1.068295919950315	3.480026500000001
BALB	mutated MAGGIE motif	0.19260308318074237	-2.950050700000001
BALB	mutated MAGGIE motif	0.7410796066439111	5.069416
BALB	mutated MAGGIE motif	-0.1793691948468199	3.3460433999999997
BALB	mutated MAGGIE motif	-0.05387160904489363	5.3132757999999995
BALB	mutated MAGGIE motif	-0.7301392852144515	-3.906388999999999
BALB	mutated MAGGIE motif	0.608676615616651	-5.3977553
BALB	mutated MAGGIE motif	3.1492623925988124	6.7134888
BALB	mutated MAGGIE motif	0.1450347762588473	9.3594412
BALB	mutated MAGGIE motif	0.5296571992904635	-6.269568700000001
BALB	mutated MAGGIE motif	-0.45889706935522145	5.2551814
BALB	mutated MAGGIE motif	-0.6401281156709642	-9.4012531
BALB	mutated MAGGIE motif	0.9428757092248814	2.7879463
BALB	mutated MAGGIE motif	-0.16644629771584807	-3.6921799999999996
BALB	mutated MAGGIE motif	-0.15245763897761488	-4.041312999999999
BALB	mutated MAGGIE motif	1.15441406048941	-3.1721509999999995
BALB	mutated MAGGIE motif	-0.6017178802887235	3.0794213000000004
BALB	mutated MAGGIE motif	-0.26565589966391645	5.939850999999999
BALB	mutated MAGGIE motif	-0.4949711286356404	-3.5741587
BALB	mutated MAGGIE motif	-0.8185998910603631	-4.381531800000001
BALB	mutated MAGGIE motif	-0.414103688575155	4.1806178
BALB	mutated MAGGIE motif	0.08965324732911029	4.9287275500000005
BALB	mutated MAGGIE motif	-0.20313768656174158	-4.0933098999999995
BALB	mutated MAGGIE motif	0.5244129218236333	6.274852700000001
BALB	mutated MAGGIE motif	-2.706034351029877	-3.8989771
BALB	mutated MAGGIE motif	-0.4858320479434086	-4.0000002
BALB	mutated MAGGIE motif	-1.8212987189905938	-6.379493499999999
BALB	mutated MAGGIE motif	-0.001413632534505993	2.1068525499999997
BALB	mutated MAGGIE motif	-1.1022270659926887	2.36866197
BALB	mutated MAGGIE motif	2.9116847444712866	6.7249631
BALB	mutated MAGGIE motif	1.4868281823468537	-6.587824599999999
BALB	mutated MAGGIE motif	2.999603600755608	6.281822000000001
BALB	mutated MAGGIE motif	-0.7136958148433594	-2.7356991699999997
BALB	mutated MAGGIE motif	-2.011421310072852	-3.0715821
BALB	mutated MAGGIE motif	-0.6513104839621784	-4.742756099999999
BALB	mutated MAGGIE motif	0.24455015324126528	7.1679402
BALB	mutated MAGGIE motif	0.012854258296149723	-8.682572400000002
BALB	mutated MAGGIE motif	-1.899911105035243	-5.4543947500000005
BALB	mutated MAGGIE motif	0.4541990372215583	-5.804855659999999
BALB	mutated MAGGIE motif	0.6053919102832541	3.77132656
BALB	mutated MAGGIE motif	0.10148082007863835	-3.3676554000000003
BALB	mutated MAGGIE motif	1.35395694908	2.048973
BALB	mutated MAGGIE motif	0.8965392664318736	6.658211499999999
BALB	mutated MAGGIE motif	0.181994743778632	3.2167064000000005
BALB	mutated MAGGIE motif	0.19417935816176524	2.837103599999998
BALB	mutated MAGGIE motif	-2.522386551682673	4.0622692
BALB	mutated MAGGIE motif	0.11594298823612714	6.560602
BALB	mutated MAGGIE motif	-0.56881836098324	-5.0582289
BALB	mutated MAGGIE motif	-0.9542855189061221	-6.724963499999999
BALB	mutated MAGGIE motif	-0.0033271649257828884	4.0
BALB	mutated MAGGIE motif	-0.3103167627226311	3.5737830999999995
BALB	altered spacing	0.23832899930791296	na
BALB	altered spacing	0.34686825754443706	na
BALB	altered spacing	0.13085023806687301	na
BALB	altered spacing	1.3747323908619675	na
BALB	altered spacing	-0.4483468375417212	na
BALB	altered spacing	1.4313439763649027	na
BALB	altered spacing	-0.3738061019541279	na
BALB	altered spacing	4.990410344428691	na
BALB	altered spacing	0.0	na
BALB	altered spacing	-2.901158996000872	na
BALB	altered spacing	0.06209469999820705	na
BALB	altered spacing	0.10100331868347578	na
BALB	altered spacing	0.6761954317838552	na
BALB	altered spacing	-0.7789324636391832	na
BALB	altered spacing	-1.2705430551572015	na
BALB	altered spacing	-0.2666010208539866	na
BALB	altered spacing	-1.0585347222279156	na
BALB	altered spacing	2.2433644256936605	na
BALB	altered spacing	-0.39695140365826553	na
BALB	altered spacing	-0.4460049290494341	na
BALB	altered spacing	0.2749385630291403	na
BALB	altered spacing	-0.8048532038537113	na
BALB	altered spacing	0.09292162360911504	na
BALB	altered spacing	-0.20880011905184404	na
BALB	altered spacing	-0.2419853252788453	na
BALB	altered spacing	0.2112792520814466	na
BALB	altered spacing	-1.5925796170534277	na
BALB	altered spacing	0.2758584461913771	na
BALB	altered spacing	0.4150374992788435	na
BALB	altered spacing	-0.34858209255003914	na
BALB	altered spacing	0.18807234815257257	na
BALB	altered spacing	-0.07179483813410314	na
BALB	altered spacing	0.8880443435637169	na
BALB	altered spacing	-0.679960255886801	na
BALB	altered spacing	-0.30136635316131155	na
BALB	altered spacing	-0.02167000363846272	na
BALB	altered spacing	-0.43048343779050846	na
BALB	altered spacing	-0.07524961898193294	na
BALB	altered spacing	-0.27660632757013115	na
BALB	altered spacing	0.8663449481310668	na
BALB	altered spacing	0.5066375365347815	na
BALB	altered spacing	-3.761384049189047	na
BALB	altered spacing	-0.7945885622664051	na
BALB	altered spacing	-1.2469756792460394	na
BALB	altered spacing	0.324372650751922	na
BALB	altered spacing	0.25988463869671197	na
BALB	altered spacing	-0.5775667574753278	na
BALB	altered spacing	-0.03393896922525563	na
BALB	altered spacing	-0.23357042688283425	na
BALB	altered spacing	-0.2272216603880972	na
BALB	altered spacing	-0.7873974099312822	na
BALB	altered spacing	0.3845471320571221	na
BALB	altered spacing	0.2311938814659822	na
BALB	altered spacing	0.2401851913870514	na
BALB	no motif/spacing effect	0.15637696411930602	na
BALB	no motif/spacing effect	-0.6907161143648608	na
BALB	no motif/spacing effect	-0.25633975325978553	na
BALB	no motif/spacing effect	-0.10794593861311697	na
BALB	no motif/spacing effect	1.4191939916624245	na
BALB	no motif/spacing effect	-0.1567568571943534	na
BALB	no motif/spacing effect	-0.2618586242295029	na
BALB	no motif/spacing effect	0.01636922249192274	na
BALB	no motif/spacing effect	-0.19039127281761026	na
BALB	no motif/spacing effect	-0.6248144116776824	na
BALB	no motif/spacing effect	-0.7593732387036018	na
BALB	no motif/spacing effect	-0.21611930425614645	na
BALB	no motif/spacing effect	0.3181039719971652	na
BALB	no motif/spacing effect	-0.20564384661283386	na
BALB	no motif/spacing effect	0.6355436335203977	na
BALB	no motif/spacing effect	-0.05373958058920891	na
BALB	no motif/spacing effect	0.05477994860055624	na
BALB	no motif/spacing effect	-0.07536142580574623	na
BALB	no motif/spacing effect	0.2580741093583283	na
BALB	no motif/spacing effect	-0.08029306569088313	na
BALB	no motif/spacing effect	-0.17000585413608071	na
BALB	no motif/spacing effect	-0.4423765541820046	na
BALB	no motif/spacing effect	-0.046012397756836076	na
BALB	no motif/spacing effect	-0.2963318444241292	na
BALB	no motif/spacing effect	0.011085682876072589	na
BALB	no motif/spacing effect	-0.3011108783277363	na
BALB	no motif/spacing effect	0.43941925845491436	na
BALB	no motif/spacing effect	-0.01029739941123875	na
BALB	no motif/spacing effect	-0.6343178061097232	na
BALB	no motif/spacing effect	-0.030991456170322174	na
BALB	no motif/spacing effect	-0.2334074817288787	na
BALB	no motif/spacing effect	0.010421246364413328	na
BALB	no motif/spacing effect	0.8841659889487442	na
BALB	no motif/spacing effect	-0.6410753608488928	na
BALB	no motif/spacing effect	-0.3803825909682308	na
BALB	no motif/spacing effect	-0.1283670912862256	na
BALB	no motif/spacing effect	0.3514597313024601	na
BALB	no motif/spacing effect	-0.8079501876012651	na
BALB	no motif/spacing effect	-1.7485057269836188	na
BALB	no motif/spacing effect	-0.5057488957909744	na
BALB	no motif/spacing effect	-1.1819978337428871	na
BALB	no motif/spacing effect	0.37676633945898175	na
BALB	no motif/spacing effect	0.5059926417509306	na
BALB	no motif/spacing effect	-0.6980261199979179	na
BALB	no motif/spacing effect	-0.20961470181246877	na
BALB	no motif/spacing effect	-0.20416108677988465	na
BALB	no motif/spacing effect	-0.1934073537416463	na
BALB	no motif/spacing effect	-0.15075346578711235	na
BALB	no motif/spacing effect	-0.3208974652497121	na
BALB	no motif/spacing effect	0.14390867914308636	na
BALB	no motif/spacing effect	-0.7980331469542286	na
BALB	no motif/spacing effect	-0.20508805353608928	na
BALB	no motif/spacing effect	-0.16204281127321973	na
BALB	no motif/spacing effect	-0.016023044839025502	na
BALB	no motif/spacing effect	1.3824198552437297	na
BALB	no motif/spacing effect	0.5516755247327012	na
BALB	no motif/spacing effect	-0.07669888966344285	na
BALB	no motif/spacing effect	-0.12165288897523219	na
BALB	no motif/spacing effect	-0.14063985230526033	na
BALB	no motif/spacing effect	0.23081701323047898	na
BALB	no motif/spacing effect	0.4412414617442435	na
BALB	no motif/spacing effect	-0.5679393528788417	na
BALB	no motif/spacing effect	-0.7476847555682364	na
BALB	no motif/spacing effect	0.27161404481189155	na
BALB	no motif/spacing effect	-0.03178494120611042	na
BALB	no motif/spacing effect	-0.28183474340512005	na
BALB	no motif/spacing effect	-0.05455230517673648	na
BALB	no motif/spacing effect	0.007896728875374848	na
BALB	no motif/spacing effect	-0.3525498119996042	na
BALB	no motif/spacing effect	-0.36544921574856915	na
BALB	no motif/spacing effect	0.7997250228100912	na
BALB	no motif/spacing effect	-0.15501850189451893	na
BALB	no motif/spacing effect	-0.08851376140526757	na
BALB	no motif/spacing effect	-0.294332818601001	na
BALB	no motif/spacing effect	0.13682891857131807	na
BALB	no motif/spacing effect	-0.19047429504199354	na
BALB	no motif/spacing effect	-0.26358490231619314	na
BALB	no motif/spacing effect	0.04392449084906591	na
BALB	no motif/spacing effect	-0.42519889165365043	na
BALB	no motif/spacing effect	0.02200439602419335	na
BALB	no motif/spacing effect	-0.4039074658032198	na
BALB	no motif/spacing effect	-0.5477583230449099	na
BALB	no motif/spacing effect	-0.28903394646555114	na
BALB	no motif/spacing effect	-0.1653398888514852	na
BALB	no motif/spacing effect	-0.02569273127237004	na
BALB	no motif/spacing effect	0.19214968023311485	na
BALB	no motif/spacing effect	-0.2298411765631947	na
BALB	no motif/spacing effect	-0.04941546492959237	na
BALB	no motif/spacing effect	-0.3094092249375011	na
BALB	no motif/spacing effect	0.04086774070481525	na
BALB	no motif/spacing effect	-0.09929706037272723	na
BALB	no motif/spacing effect	-0.8314029795754649	na
BALB	no motif/spacing effect	0.11124009144412472	na
BALB	no motif/spacing effect	0.7324785803771228	na
BALB	no motif/spacing effect	-0.3809782557388086	na
BALB	no motif/spacing effect	-0.3210843313146876	na
BALB	no motif/spacing effect	-0.26490412103120065	na
BALB	no motif/spacing effect	-0.41721266622281394	na
BALB	no motif/spacing effect	-0.39554331607853666	na
BALB	no motif/spacing effect	-0.3880388333375562	na
BALB	no motif/spacing effect	-0.07759337519741472	na
BALB	no motif/spacing effect	-0.04867384673568953	na
BALB	no motif/spacing effect	-0.2577188260639658	na
BALB	no motif/spacing effect	0.6048180420179983	na
BALB	no motif/spacing effect	-0.035690286144503425	na
BALB	no motif/spacing effect	-0.14951913236127812	na
BALB	no motif/spacing effect	-0.2175253140037645	na
BALB	no motif/spacing effect	-0.2962185304172946	na
BALB	no motif/spacing effect	0.6685970663372158	na
BALB	no motif/spacing effect	0.016705104501330226	na
BALB	no motif/spacing effect	-0.22506116257381414	na
BALB	no motif/spacing effect	1.0706495308032564	na
BALB	no motif/spacing effect	-0.9411063109464313	na
BALB	no motif/spacing effect	0.06984039733784897	na
BALB	no motif/spacing effect	-0.07717719180140659	na
BALB	no motif/spacing effect	-0.30369926155613225	na
BALB	no motif/spacing effect	0.3041341622255498	na
BALB	no motif/spacing effect	-0.4031701871764799	na
BALB	no motif/spacing effect	-0.07698973902820416	na
BALB	no motif/spacing effect	-0.4848456030809105	na
BALB	no motif/spacing effect	-0.13446715211484594	na
BALB	no motif/spacing effect	0.2801361599859331	na
BALB	no motif/spacing effect	-0.190178273449658	na
BALB	no motif/spacing effect	-0.3087301651094858	na
BALB	no motif/spacing effect	-0.5169624006033482	na
BALB	no motif/spacing effect	-0.024910329040719326	na
BALB	no motif/spacing effect	0.2982739932875429	na
BALB	no motif/spacing effect	-0.03280621710995568	na
BALB	no motif/spacing effect	-0.44292020254527564	na
BALB	no motif/spacing effect	0.2809352604269817	na
BALB	no motif/spacing effect	0.35369149781959486	na
BALB	no motif/spacing effect	-0.2056755118255138	na
BALB	no motif/spacing effect	-0.48471871252769816	na
BALB	no motif/spacing effect	-0.17209810485202492	na
BALB	no motif/spacing effect	-0.15997026741223141	na
BALB	no motif/spacing effect	-0.12165425877112401	na
BALB	no motif/spacing effect	-0.32903498138162246	na
BALB	no motif/spacing effect	-0.3297277943710686	na
BALB	no motif/spacing effect	-0.400341357039788	na
BALB	no motif/spacing effect	0.1588698129333166	na
BALB	no motif/spacing effect	0.7927506985657811	na
BALB	no motif/spacing effect	-0.10917516864272692	na
BALB	no motif/spacing effect	-0.5775673946165165	na
BALB	no motif/spacing effect	-0.18195227491786348	na
BALB	no motif/spacing effect	-0.08199487101015013	na
BALB	no motif/spacing effect	-0.19123229270159836	na
BALB	no motif/spacing effect	-0.15506797004996997	na
BALB	no motif/spacing effect	-0.33253594917148277	na
BALB	no motif/spacing effect	-0.30107032817911694	na
BALB	no motif/spacing effect	-0.3192842289294009	na
BALB	no motif/spacing effect	-0.10751682821250785	na
BALB	no motif/spacing effect	-0.2992325863580456	na
BALB	no motif/spacing effect	-0.4251245763155085	na
BALB	no motif/spacing effect	-0.353549442484427	na
BALB	no motif/spacing effect	0.027722775351850082	na
BALB	no motif/spacing effect	-0.09204113700399041	na
BALB	no motif/spacing effect	-0.02346566707625275	na
BALB	no motif/spacing effect	-0.08723974818563818	na
BALB	no motif/spacing effect	0.18869890561210045	na
BALB	no motif/spacing effect	0.024259004801234774	na
BALB	no motif/spacing effect	-0.06906794174321274	na
BALB	no motif/spacing effect	-0.23981956067541432	na
BALB	no motif/spacing effect	0.3141518191886359	na
BALB	no motif/spacing effect	0.0949143193040074	na
BALB	no motif/spacing effect	-0.10836724051463431	na
BALB	no motif/spacing effect	1.725625512075962	na
BALB	no motif/spacing effect	-0.06804198975322429	na
BALB	no motif/spacing effect	0.5896185684920066	na
BALB	no motif/spacing effect	-0.4882328162542864	na
BALB	no motif/spacing effect	0.21869465994073156	na
BALB	no motif/spacing effect	-0.3631817796444082	na
BALB	no motif/spacing effect	-0.3761171778358925	na
BALB	no motif/spacing effect	0.1404750902812255	na
BALB	no motif/spacing effect	-0.24127250013871038	na
BALB	no motif/spacing effect	-0.26211341513509545	na
BALB	no motif/spacing effect	-0.00522375485945048	na
BALB	no motif/spacing effect	-0.2623484509342866	na
BALB	no motif/spacing effect	0.31981011793605285	na
BALB	no motif/spacing effect	0.08768152651569672	na
BALB	no motif/spacing effect	-0.5708930691290153	na
BALB	no motif/spacing effect	-0.12334253175268106	na
BALB	no motif/spacing effect	0.04831581636446547	na
BALB	no motif/spacing effect	2.605443948160356	na
BALB	no motif/spacing effect	0.30603786968047597	na
BALB	no motif/spacing effect	-0.5510151687978184	na
BALB	no motif/spacing effect	0.08320451718885202	na
BALB	no motif/spacing effect	-0.0900715055041248	na
BALB	no motif/spacing effect	0.13453583143713388	na
BALB	no motif/spacing effect	-0.3387704452343758	na
BALB	no motif/spacing effect	-0.14851360394458535	na
BALB	no motif/spacing effect	1.6777672498394354	na
BALB	no motif/spacing effect	-0.16340428725381972	na
BALB	no motif/spacing effect	-0.13246554013462752	na
BALB	no motif/spacing effect	-0.05882555544752588	na
BALB	no motif/spacing effect	-0.3128196937716039	na
BALB	no motif/spacing effect	-0.32832009504531356	na
BALB	no motif/spacing effect	-0.2479383902566088	na
BALB	no motif/spacing effect	-0.3345560716509395	na
BALB	no motif/spacing effect	-0.6897753642821192	na
BALB	no motif/spacing effect	0.05110898354841442	na
BALB	no motif/spacing effect	-0.3607935714966297	na
BALB	no motif/spacing effect	-0.26920607999752466	na
BALB	no motif/spacing effect	-0.2176258939375515	na
BALB	no motif/spacing effect	-0.3897434791149339	na
BALB	no motif/spacing effect	0.0726775044866681	na
BALB	no motif/spacing effect	-0.2951810358574205	na
BALB	no motif/spacing effect	-0.31075534439999064	na
BALB	no motif/spacing effect	-0.08146779359258494	na
BALB	no motif/spacing effect	-0.10411808229624242	na
BALB	no motif/spacing effect	-0.16168359628457818	na
BALB	no motif/spacing effect	0.10931324577588786	na
BALB	no motif/spacing effect	-0.5913803618073601	na
BALB	no motif/spacing effect	-0.1359540968975841	na
BALB	no motif/spacing effect	-0.39485961734121355	na
BALB	no motif/spacing effect	0.11861692495050313	na
BALB	no motif/spacing effect	0.11031449468556342	na
BALB	no motif/spacing effect	-0.267051423709165	na
BALB	no motif/spacing effect	0.33134845318855	na
BALB	no motif/spacing effect	-0.09890184885554199	na
BALB	no motif/spacing effect	-0.02486069079669395	na
BALB	no motif/spacing effect	0.2510947925222684	na
BALB	no motif/spacing effect	-0.6234273226252833	na
BALB	no motif/spacing effect	0.9985149818134111	na
BALB	no motif/spacing effect	-0.3842513738591933	na
BALB	no motif/spacing effect	-0.080434242558864	na
BALB	no motif/spacing effect	0.3675873261686009	na
BALB	no motif/spacing effect	-0.6403923344711533	na
BALB	no motif/spacing effect	0.2287948811838847	na
BALB	no motif/spacing effect	0.446683125895309	na
BALB	no motif/spacing effect	-0.045377274199918105	na
BALB	no motif/spacing effect	-0.5952397567051397	na
BALB	no motif/spacing effect	-0.41979625578997926	na
BALB	no motif/spacing effect	-0.3039456855068958	na
BALB	no motif/spacing effect	-0.15210165165255418	na
BALB	no motif/spacing effect	0.02952727611768413	na
BALB	no motif/spacing effect	0.4932258776860534	na
BALB	no motif/spacing effect	-0.26303440583379434	na
BALB	no motif/spacing effect	0.3079121561722795	na
BALB	no motif/spacing effect	0.5468627107862631	na
BALB	no motif/spacing effect	-0.06238892790654127	na
BALB	no motif/spacing effect	-0.12432434143621673	na
BALB	no motif/spacing effect	-0.15212317293580835	na
BALB	no motif/spacing effect	-0.24268743766054612	na
BALB	no motif/spacing effect	0.37357666376056287	na
BALB	no motif/spacing effect	-0.46987006261296216	na
BALB	no motif/spacing effect	0.15659681487044352	na
BALB	no motif/spacing effect	0.4432894652650212	na
BALB	no motif/spacing effect	-0.16444884929037507	na
BALB	no motif/spacing effect	1.3117142820253629	na
BALB	no motif/spacing effect	0.014058725954532392	na
BALB	no motif/spacing effect	-0.38193117991807757	na
BALB	no motif/spacing effect	-2.115558219920779	na
BALB	no motif/spacing effect	-0.315435218418501	na
BALB	no motif/spacing effect	-0.9424812507656899	na
BALB	no motif/spacing effect	0.05871723901766579	na
BALB	no motif/spacing effect	-0.6022404921529922	na
BALB	no motif/spacing effect	0.05502221964250342	na
BALB	no motif/spacing effect	1.461842365227005	na
BALB	no motif/spacing effect	1.9343530015026271	na
BALB	no motif/spacing effect	0.30565860606420925	na
BALB	no motif/spacing effect	0.2533119764005516	na
BALB	no motif/spacing effect	-0.22330224767875784	na
BALB	no motif/spacing effect	0.5151766846732748	na
BALB	no motif/spacing effect	0.3342570799493991	na
BALB	no motif/spacing effect	-0.3787344505058359	na
BALB	no motif/spacing effect	-3.162539426590109	na
BALB	no motif/spacing effect	0.284496605280133	na
BALB	no motif/spacing effect	-0.6782776555569852	na
BALB	no motif/spacing effect	-0.16371314252416713	na
BALB	no motif/spacing effect	0.19960473049322847	na
BALB	no motif/spacing effect	-0.668418731813679	na
BALB	no motif/spacing effect	-0.3624610939235886	na
BALB	no motif/spacing effect	0.3522682703397497	na
BALB	no motif/spacing effect	-0.6493244024142375	na
BALB	no motif/spacing effect	-0.3656454701870091	na
BALB	no motif/spacing effect	-1.0076688289059947	na
BALB	no motif/spacing effect	-0.14954425155184836	na
BALB	no motif/spacing effect	-0.531609824570467	na
BALB	no motif/spacing effect	0.25384785083576844	na
BALB	no motif/spacing effect	-0.16194340552271314	na
BALB	no motif/spacing effect	-0.20385510108632943	na
BALB	no motif/spacing effect	-0.11012483366954307	na
BALB	no motif/spacing effect	-0.24113016030968648	na
BALB	no motif/spacing effect	-0.15032068388548936	na
BALB	no motif/spacing effect	0.09036700755303695	na
BALB	no motif/spacing effect	0.6314609628210478	na
BALB	no motif/spacing effect	-0.0407794677077673	na
BALB	no motif/spacing effect	0.4049811901101359	na
BALB	no motif/spacing effect	-0.20263866946459075	na
BALB	no motif/spacing effect	-0.3266481281730931	na
BALB	no motif/spacing effect	-0.07635344150464896	na
BALB	no motif/spacing effect	-0.011607602645643755	na
BALB	no motif/spacing effect	-0.1550294593835444	na
BALB	no motif/spacing effect	-0.30055737571357355	na
BALB	no motif/spacing effect	0.21022053262828688	na
BALB	no motif/spacing effect	0.2777591779619639	na
BALB	no motif/spacing effect	-0.5095417338979598	na
BALB	no motif/spacing effect	-0.5623561732970321	na
BALB	no motif/spacing effect	0.354556395752754	na
BALB	no motif/spacing effect	-0.0649695618365902	na
BALB	no motif/spacing effect	0.17965379121707503	na
BALB	no motif/spacing effect	0.13008545038291164	na
BALB	no motif/spacing effect	-0.3611887888753458	na
BALB	no motif/spacing effect	-0.6168098215111173	na
BALB	no motif/spacing effect	-0.03158442425505559	na
BALB	no motif/spacing effect	0.21208495876608335	na
BALB	no motif/spacing effect	0.2150897957412985	na
BALB	no motif/spacing effect	1.1332665308634642	na
BALB	no motif/spacing effect	0.45416468638022867	na
BALB	no motif/spacing effect	-0.30046098114890185	na
BALB	no motif/spacing effect	-0.06803837679967817	na
BALB	no motif/spacing effect	-0.04540957718594374	na
BALB	no motif/spacing effect	0.4586499155561494	na
BALB	no motif/spacing effect	-0.01739849468241328	na
BALB	no motif/spacing effect	-0.16272950003810838	na
BALB	no motif/spacing effect	-0.22110895920834484	na
BALB	no motif/spacing effect	-0.2887813012297826	na
BALB	no motif/spacing effect	-0.2407680105829435	na
BALB	no motif/spacing effect	-0.23149586805613476	na
BALB	no motif/spacing effect	-0.30875270613962913	na
BALB	no motif/spacing effect	-0.624477819764218	na
BALB	no motif/spacing effect	-0.21043696070042905	na
BALB	no motif/spacing effect	-0.20604442724896455	na
BALB	no motif/spacing effect	-0.10406133984193566	na
BALB	no motif/spacing effect	-0.289277239185866	na
BALB	no motif/spacing effect	-0.3021856575842312	na
BALB	no motif/spacing effect	-0.030278703217704095	na
BALB	no motif/spacing effect	-0.2113552279384443	na
BALB	no motif/spacing effect	-0.3274539203527258	na
BALB	no motif/spacing effect	-0.30889186018645276	na
BALB	no motif/spacing effect	-0.2586056041188005	na
BALB	no motif/spacing effect	3.3461393879656196	na
BALB	no motif/spacing effect	-0.5772567415161287	na
BALB	no motif/spacing effect	-0.0204353811708744	na
BALB	no motif/spacing effect	-0.20895083144205273	na
BALB	no motif/spacing effect	0.10499836482153935	na
BALB	no motif/spacing effect	-0.33356603995081535	na
BALB	no motif/spacing effect	-0.44388787899529625	na
BALB	no motif/spacing effect	0.4711134236849328	na
BALB	no motif/spacing effect	-0.3768069423811107	na
BALB	no motif/spacing effect	0.5486423238253542	na
BALB	no motif/spacing effect	1.0661559364704916	na
BALB	no motif/spacing effect	-0.23353648763908819	na
BALB	no motif/spacing effect	-0.26874874630058887	na
BALB	no motif/spacing effect	-0.2122206162791569	na
BALB	no motif/spacing effect	-0.1378110321208208	na
BALB	no motif/spacing effect	-0.026882460434635824	na
BALB	no motif/spacing effect	0.6706365740942353	na
BALB	no motif/spacing effect	-0.24188910956298226	na
BALB	no motif/spacing effect	-0.48768568659332523	na
BALB	no motif/spacing effect	-1.0386322385365148	na
BALB	no motif/spacing effect	0.09766491064201421	na
BALB	no motif/spacing effect	2.607516082311488	na
BALB	no motif/spacing effect	-0.3318414144364592	na
BALB	no motif/spacing effect	0.16210702054571602	na
BALB	no motif/spacing effect	2.162065914646342	na
BALB	no motif/spacing effect	0.35751675775955416	na
BALB	no motif/spacing effect	-1.7496051316566357	na
BALB	no motif/spacing effect	-0.07653927215837619	na
BALB	no motif/spacing effect	1.1461186196742892	na
BALB	no motif/spacing effect	-0.12946668201631972	na
BALB	no motif/spacing effect	-0.24054542016627245	na
BALB	no motif/spacing effect	-0.14668262582230174	na
BALB	no motif/spacing effect	0.8844780887328545	na
BALB	no motif/spacing effect	0.28408046426600286	na
BALB	no motif/spacing effect	-0.49461058236088373	na
BALB	no motif/spacing effect	-0.37735634727019285	na
BALB	no motif/spacing effect	0.539527851176314	na
BALB	no motif/spacing effect	0.5197924406890673	na
BALB	no motif/spacing effect	-0.11238013469031038	na
BALB	no motif/spacing effect	0.6529969118457393	na
BALB	no motif/spacing effect	0.1619264928444213	na
BALB	no motif/spacing effect	-0.2231894904400873	na
BALB	no motif/spacing effect	-0.420279039941553	na
BALB	no motif/spacing effect	0.25075296753071363	na
BALB	no motif/spacing effect	-0.18069270110159596	na
BALB	no motif/spacing effect	-0.3372496580674751	na
BALB	no motif/spacing effect	0.6617221955640833	na
BALB	no motif/spacing effect	-0.03683186979317199	na
BALB	no motif/spacing effect	-0.3028510665213364	na
BALB	no motif/spacing effect	-0.16339825789140416	na
BALB	no motif/spacing effect	0.3331242542581858	na
BALB	no motif/spacing effect	-0.047001147208546534	na
BALB	no motif/spacing effect	0.14741677089265526	na
BALB	no motif/spacing effect	0.23295472551059238	na
BALB	no motif/spacing effect	-0.13278452089990278	na
BALB	no motif/spacing effect	-0.22476397536235426	na
BALB	no motif/spacing effect	0.057952355724819604	na
BALB	no motif/spacing effect	-0.09823904409578166	na
BALB	no motif/spacing effect	-0.1577531016790239	na
BALB	no motif/spacing effect	-0.0010751671402271512	na
BALB	no motif/spacing effect	-0.1275068208160146	na
BALB	no motif/spacing effect	0.376175740872255	na
BALB	no motif/spacing effect	-0.2597305318213827	na
BALB	no motif/spacing effect	-0.31776127241978624	na
BALB	no motif/spacing effect	0.38592476367980444	na
BALB	no motif/spacing effect	0.055999275352790256	na
BALB	no motif/spacing effect	0.18800096915443731	na
BALB	no motif/spacing effect	-0.27806117117572526	na
BALB	no motif/spacing effect	-0.06156897322419219	na
BALB	no motif/spacing effect	-0.2834006682624679	na
BALB	no motif/spacing effect	-0.29007815942415416	na
BALB	no motif/spacing effect	-0.22026612022806047	na
BALB	no motif/spacing effect	-0.23934778914213695	na
BALB	no motif/spacing effect	-0.36178289066633695	na
BALB	no motif/spacing effect	-0.29858591110584687	na
BALB	no motif/spacing effect	-0.3840934001032732	na
BALB	no motif/spacing effect	-0.7068245457123021	na
BALB	no motif/spacing effect	-0.46692725514316535	na
BALB	no motif/spacing effect	-0.33663817952283903	na
BALB	no motif/spacing effect	-0.33629476628306243	na
BALB	no motif/spacing effect	-0.14756824655642387	na
BALB	no motif/spacing effect	-0.4771796750912203	na
BALB	no motif/spacing effect	-0.3247640736263806	na
BALB	no motif/spacing effect	-0.052795504702419116	na
BALB	no motif/spacing effect	-0.3441347176216363	na
BALB	no motif/spacing effect	-0.7978458896834235	na
BALB	no motif/spacing effect	-0.4334946002718585	na
BALB	no motif/spacing effect	-1.1613338528847976	na
BALB	no motif/spacing effect	0.05772182175775775	na
BALB	no motif/spacing effect	0.48828376621296954	na
BALB	no motif/spacing effect	-0.5121032233731206	na
BALB	no motif/spacing effect	-0.4880034524258554	na
BALB	no motif/spacing effect	-0.10857448452086338	na
BALB	no motif/spacing effect	0.6466619743098443	na
BALB	no motif/spacing effect	-0.10460007261925064	na
BALB	no motif/spacing effect	-0.3075343926442269	na
BALB	no motif/spacing effect	-0.06389813870558125	na
BALB	no motif/spacing effect	-0.0654833779242514	na
BALB	no motif/spacing effect	-0.10910628174331993	na
BALB	no motif/spacing effect	-0.33489129272664453	na
BALB	no motif/spacing effect	0.29168921222683375	na
BALB	no motif/spacing effect	-0.6437099385666425	na
BALB	no motif/spacing effect	-0.048923141128283554	na
BALB	no motif/spacing effect	-0.45675956133767226	na
BALB	no motif/spacing effect	-0.45929529312372264	na
BALB	no motif/spacing effect	-0.32383310031988355	na
BALB	no motif/spacing effect	-0.46053301949191017	na
BALB	no motif/spacing effect	-0.2894261276256218	na
BALB	no motif/spacing effect	0.44348699277474424	na
BALB	no motif/spacing effect	-0.126117633118076	na
BALB	no motif/spacing effect	-0.1555261030338695	na
BALB	no motif/spacing effect	-0.851054687319218	na
BALB	no motif/spacing effect	-0.24736721384610405	na
BALB	no motif/spacing effect	-0.2698962699681564	na
BALB	no motif/spacing effect	-0.27083291007585775	na
BALB	no motif/spacing effect	0.11045426099783562	na
BALB	no motif/spacing effect	-0.46237395253403335	na
BALB	no motif/spacing effect	0.08957391745129861	na
BALB	no motif/spacing effect	-0.1832381194979913	na
BALB	no motif/spacing effect	-0.33799234643635057	na
BALB	no motif/spacing effect	-0.1418607715201814	na
BALB	no motif/spacing effect	-0.19332871659002526	na
BALB	no motif/spacing effect	-0.6220582490514257	na
BALB	no motif/spacing effect	-0.258486719359615	na
BALB	no motif/spacing effect	0.5038160048204592	na
BALB	no motif/spacing effect	-0.3010782727028234	na
BALB	no motif/spacing effect	-0.5831730320260222	na
BALB	no motif/spacing effect	1.1964168318316042	na
BALB	no motif/spacing effect	2.624375157722353	na
BALB	no motif/spacing effect	0.9993422862704007	na
BALB	no motif/spacing effect	-0.4156629903100546	na
BALB	no motif/spacing effect	0.5985479734542798	na
BALB	no motif/spacing effect	2.0683136430850007	na
BALB	no motif/spacing effect	0.31278744103089284	na
BALB	no motif/spacing effect	-0.03281756170724659	na
BALB	no motif/spacing effect	-0.0017350513707476978	na
BALB	no motif/spacing effect	-0.3382497796084367	na
BALB	no motif/spacing effect	0.18905805629691397	na
BALB	no motif/spacing effect	0.49222563134055086	na
BALB	no motif/spacing effect	0.35897631739133384	na
BALB	no motif/spacing effect	-0.38011125092939047	na
BALB	no motif/spacing effect	-0.17350082111008547	na
BALB	no motif/spacing effect	-0.24518075618229496	na
BALB	no motif/spacing effect	-0.2726240055524993	na
BALB	no motif/spacing effect	-0.9060478712641773	na
BALB	no motif/spacing effect	0.025483542429934225	na
BALB	no motif/spacing effect	1.3951486303316605	na
BALB	no motif/spacing effect	-0.26878684158142985	na
BALB	no motif/spacing effect	-0.7406063796352971	na
BALB	no motif/spacing effect	-0.16535940524924353	na
BALB	no motif/spacing effect	-0.4643806709664826	na
BALB	no motif/spacing effect	-0.08029746709029961	na
BALB	no motif/spacing effect	-0.24147499866186628	na
BALB	no motif/spacing effect	-0.2806378347325369	na
BALB	no motif/spacing effect	0.5705520577969896	na
BALB	no motif/spacing effect	0.03548741603848704	na
BALB	no motif/spacing effect	0.3141469309157512	na
BALB	no motif/spacing effect	0.8981719546984825	na
BALB	no motif/spacing effect	-0.4442006790879969	na
BALB	no motif/spacing effect	-0.4386161532571755	na
BALB	no motif/spacing effect	-0.16957154203917524	na
BALB	no motif/spacing effect	-0.7911231571592925	na
BALB	no motif/spacing effect	0.21732766261223002	na
BALB	no motif/spacing effect	0.2745704903368722	na
BALB	no motif/spacing effect	0.6800184244646674	na
BALB	no motif/spacing effect	0.15531644104658948	na
BALB	no motif/spacing effect	0.8109127414707933	na
BALB	no motif/spacing effect	-0.8449090690235215	na
BALB	no motif/spacing effect	-0.16692302854732866	na
BALB	no motif/spacing effect	0.1486859301853274	na
BALB	no motif/spacing effect	0.2341676139397446	na
BALB	no motif/spacing effect	-0.23635236318128872	na
BALB	no motif/spacing effect	0.05762210704104298	na
BALB	no motif/spacing effect	0.49830566139178245	na
BALB	no motif/spacing effect	0.7429344894400929	na
BALB	no motif/spacing effect	1.0274111166831195	na
BALB	no motif/spacing effect	0.344005807360257	na
BALB	no motif/spacing effect	-0.04260440992408121	na
BALB	no motif/spacing effect	-0.12599559300457575	na
BALB	no motif/spacing effect	-0.4561896059451451	na
BALB	no motif/spacing effect	-0.05025752151836915	na
BALB	no motif/spacing effect	0.05518291526930863	na
BALB	no motif/spacing effect	-0.0028435502057142514	na
BALB	no motif/spacing effect	0.3436725239086611	na
BALB	no motif/spacing effect	-1.3881333820853436	na
BALB	no motif/spacing effect	-0.3463834500471785	na
BALB	no motif/spacing effect	-0.18297983421305908	na
BALB	no motif/spacing effect	-0.6341336129698716	na
BALB	no motif/spacing effect	1.0531113364595623	na
BALB	no motif/spacing effect	-0.31071807174342947	na
BALB	no motif/spacing effect	-0.10921155305038077	na
BALB	no motif/spacing effect	1.0995356735509145	na
BALB	no motif/spacing effect	-0.199666595409572	na
BALB	no motif/spacing effect	-0.035490592055034575	na
BALB	no motif/spacing effect	-0.037171232797624576	na
BALB	no motif/spacing effect	-0.19833570013498303	na
BALB	no motif/spacing effect	-0.11908562614660223	na
BALB	no motif/spacing effect	-0.05714171487755415	na
BALB	no motif/spacing effect	-0.15256438646058967	na
BALB	no motif/spacing effect	-0.5412004384393345	na
BALB	no motif/spacing effect	0.14417526988068552	na
BALB	no motif/spacing effect	-0.21009053446872006	na
BALB	no motif/spacing effect	0.35595826652482154	na
BALB	no motif/spacing effect	-0.31967505688512254	na
BALB	no motif/spacing effect	-0.2820700283532034	na
BALB	no motif/spacing effect	-0.14052920878513664	na
BALB	no motif/spacing effect	-0.3657975439428407	na
BALB	no motif/spacing effect	0.2703339264918654	na
BALB	no motif/spacing effect	1.1477725487298271	na
BALB	no motif/spacing effect	0.0388289551597758	na
BALB	no motif/spacing effect	0.24102166957223226	na
BALB	no motif/spacing effect	-0.41959060880572796	na
BALB	no motif/spacing effect	-0.43051507075789885	na
BALB	no motif/spacing effect	-0.027404386581798335	na
BALB	no motif/spacing effect	-0.1573993803100313	na
BALB	no motif/spacing effect	-0.41000134234138663	na
BALB	no motif/spacing effect	-0.04793338985248319	na
BALB	no motif/spacing effect	-0.6076713426347533	na
BALB	no motif/spacing effect	0.19240460872925613	na
BALB	no motif/spacing effect	-0.2011029206437378	na
BALB	no motif/spacing effect	0.31220492253539645	na
BALB	no motif/spacing effect	-0.09892594510908914	na
BALB	no motif/spacing effect	-0.48465869758677904	na
BALB	no motif/spacing effect	-0.47142218607079567	na
BALB	no motif/spacing effect	-0.40878196287083224	na
BALB	no motif/spacing effect	-0.25041763840599884	na
BALB	no motif/spacing effect	-0.12523379779267785	na
BALB	no motif/spacing effect	-0.40317641541601557	na
BALB	no motif/spacing effect	-0.6438839469880451	na
BALB	no motif/spacing effect	-0.2620973601551002	na
BALB	no motif/spacing effect	-0.49891813915334815	na
BALB	no motif/spacing effect	-0.01738525195452567	na
BALB	no motif/spacing effect	-0.6510086977716982	na
BALB	no motif/spacing effect	-0.21503870524132118	na
BALB	no motif/spacing effect	0.20957726021034784	na
BALB	no motif/spacing effect	-0.26277794951085554	na
BALB	no motif/spacing effect	-0.49453050701716084	na
BALB	no motif/spacing effect	0.2073469415739293	na
BALB	no motif/spacing effect	0.24273030937870477	na
BALB	no motif/spacing effect	1.3285544170073407	na
BALB	no motif/spacing effect	0.29908483506777905	na
BALB	no motif/spacing effect	0.26863111624184466	na
BALB	no motif/spacing effect	-0.03755698628286375	na
BALB	no motif/spacing effect	-0.2405270949847127	na
BALB	no motif/spacing effect	-0.2340508491355262	na
BALB	no motif/spacing effect	-0.04837844932778257	na
BALB	no motif/spacing effect	-0.1242239128572491	na
BALB	no motif/spacing effect	-0.7488219518559935	na
BALB	no motif/spacing effect	0.26344315921261163	na
BALB	no motif/spacing effect	-0.25572960521056043	na
BALB	no motif/spacing effect	-0.3892613558003015	na
BALB	no motif/spacing effect	-0.20949560960186364	na
BALB	no motif/spacing effect	-0.2572965320208427	na
BALB	no motif/spacing effect	-0.04683521506898192	na
BALB	no motif/spacing effect	-0.44833594194922366	na
BALB	no motif/spacing effect	-0.39781857840645873	na
BALB	no motif/spacing effect	-0.12919474902356543	na
BALB	no motif/spacing effect	-0.15102382411005433	na
BALB	no motif/spacing effect	-0.3464906369263172	na
BALB	no motif/spacing effect	-0.18571950574506868	na
BALB	no motif/spacing effect	-0.13910512812286946	na
BALB	no motif/spacing effect	-0.9353177572495044	na
BALB	no motif/spacing effect	-0.3469898549346748	na
BALB	no motif/spacing effect	-0.22094028730253568	na
BALB	no motif/spacing effect	0.41133930991018985	na
BALB	no motif/spacing effect	-0.056170405171384274	na
BALB	no motif/spacing effect	-0.012335844494959503	na
BALB	no motif/spacing effect	-0.4565996847513949	na
BALB	no motif/spacing effect	0.02729504465542565	na
BALB	no motif/spacing effect	-0.1512746435225356	na
BALB	no motif/spacing effect	-0.21521846287975333	na
BALB	no motif/spacing effect	-0.20407782175507805	na
BALB	no motif/spacing effect	-0.20586254515552582	na
BALB	no motif/spacing effect	0.9368061735128057	na
BALB	no motif/spacing effect	-0.12775224682230402	na
BALB	no motif/spacing effect	0.15922463181116342	na
BALB	no motif/spacing effect	-0.20930096456545666	na
BALB	no motif/spacing effect	-0.33937995246569397	na
BALB	no motif/spacing effect	-0.2194892196277829	na
BALB	no motif/spacing effect	-0.20185971508773015	na
BALB	no motif/spacing effect	-0.31856607211793797	na
BALB	no motif/spacing effect	-0.4906477074755138	na
BALB	no motif/spacing effect	0.523352155279956	na
BALB	no motif/spacing effect	-0.17327505195439574	na
BALB	no motif/spacing effect	0.23132554610645517	na
BALB	no motif/spacing effect	-0.5119889961333879	na
BALB	no motif/spacing effect	4.417177411906387	na
BALB	no motif/spacing effect	0.15451954753764507	na
BALB	no motif/spacing effect	0.40511400650356744	na
BALB	no motif/spacing effect	2.2580913561609686	na
BALB	no motif/spacing effect	-0.24478999978201088	na
BALB	no motif/spacing effect	-0.4461697192283749	na
BALB	no motif/spacing effect	-0.21735207661158107	na
BALB	no motif/spacing effect	-0.09366574307636188	na
BALB	no motif/spacing effect	-0.36108036306322777	na
BALB	no motif/spacing effect	-0.04186894789677442	na
BALB	no motif/spacing effect	-0.9145894263850622	na
BALB	no motif/spacing effect	0.7334033823789112	na
BALB	no motif/spacing effect	0.5018948022030258	na
BALB	no motif/spacing effect	0.49166994513498175	na
BALB	no motif/spacing effect	0.1867685116057265	na
BALB	no motif/spacing effect	-0.048442633316847505	na
BALB	no motif/spacing effect	0.41650793932657937	na
BALB	no motif/spacing effect	0.09028888532910306	na
BALB	no motif/spacing effect	-0.49316427977073074	na
BALB	no motif/spacing effect	-0.2756344426134273	na
BALB	no motif/spacing effect	-0.15303744236898265	na
BALB	no motif/spacing effect	0.19877489917397062	na
BALB	no motif/spacing effect	-0.08067367558770044	na
BALB	no motif/spacing effect	0.24689764630529876	na
BALB	no motif/spacing effect	-0.013099191944068167	na
BALB	no motif/spacing effect	-0.9799343769458941	na
BALB	no motif/spacing effect	-0.09089352567034847	na
BALB	no motif/spacing effect	-0.42768638802079995	na
BALB	no motif/spacing effect	-0.17158070850441653	na
BALB	no motif/spacing effect	-0.01803017605289181	na
BALB	no motif/spacing effect	0.27548853026886366	na
BALB	no motif/spacing effect	-0.0643770742712153	na
BALB	no motif/spacing effect	-0.10314265033299908	na
BALB	no motif/spacing effect	0.11613895355609527	na
BALB	no motif/spacing effect	0.3498545760199345	na
BALB	no motif/spacing effect	0.15912250534522032	na
BALB	no motif/spacing effect	0.19723880503534463	na
BALB	no motif/spacing effect	-0.2591239038127542	na
BALB	no motif/spacing effect	-0.08148967794457196	na
BALB	no motif/spacing effect	-0.04227367263543247	na
BALB	no motif/spacing effect	-0.4914446480417265	na
BALB	no motif/spacing effect	-0.2537337827779167	na
BALB	no motif/spacing effect	-0.037394062263936156	na
BALB	no motif/spacing effect	0.10438932925748423	na
BALB	no motif/spacing effect	-0.3185218764453617	na
BALB	no motif/spacing effect	-0.29686324236746753	na
BALB	no motif/spacing effect	-0.03173065451453194	na
BALB	no motif/spacing effect	-0.20614717070298383	na
BALB	no motif/spacing effect	-0.489763391563927	na
BALB	no motif/spacing effect	-0.07477732243423763	na
BALB	no motif/spacing effect	-0.47717816862993345	na
BALB	no motif/spacing effect	-0.3914249420568927	na
BALB	no motif/spacing effect	-0.8396058212367832	na
BALB	no motif/spacing effect	-0.18395066941846316	na
BALB	no motif/spacing effect	0.16318670701618743	na
BALB	no motif/spacing effect	0.11464534659777215	na
BALB	no motif/spacing effect	-0.4438404773544633	na
BALB	no motif/spacing effect	-0.14711637653083365	na
BALB	no motif/spacing effect	-0.3696414562820882	na
BALB	no motif/spacing effect	-0.1797980889127775	na
BALB	no motif/spacing effect	-0.2527191598245073	na
BALB	no motif/spacing effect	0.03757030986798782	na
BALB	no motif/spacing effect	-0.44502724020895634	na
BALB	no motif/spacing effect	-0.6987965781186203	na
BALB	no motif/spacing effect	-0.33300236352133084	na
BALB	no motif/spacing effect	-0.29391192321439163	na
BALB	no motif/spacing effect	1.6355564364145394	na
BALB	no motif/spacing effect	-0.02265435456576803	na
BALB	no motif/spacing effect	0.6003925412907618	na
BALB	no motif/spacing effect	0.6355954346360515	na
BALB	no motif/spacing effect	0.1564953445451165	na
BALB	no motif/spacing effect	0.20833138275725283	na
BALB	no motif/spacing effect	-0.00010886210462768275	na
BALB	no motif/spacing effect	0.5520928186941356	na
BALB	no motif/spacing effect	0.9826790897372728	na
BALB	no motif/spacing effect	-0.008658216476619351	na
BALB	no motif/spacing effect	0.264618744786266	na
BALB	no motif/spacing effect	0.14342624579834684	na
BALB	no motif/spacing effect	-0.18186461475383764	na
BALB	no motif/spacing effect	-0.06729238335223497	na
BALB	no motif/spacing effect	1.035795786294134	na
BALB	no motif/spacing effect	0.2933663363682033	na
BALB	no motif/spacing effect	0.1518483725439541	na
BALB	no motif/spacing effect	0.45884111653168436	na
BALB	no motif/spacing effect	0.42186169839277543	na
BALB	no motif/spacing effect	0.8199640928491814	na
BALB	no motif/spacing effect	0.35347799528104407	na
BALB	no motif/spacing effect	-0.5482697241412042	na
BALB	no motif/spacing effect	-0.5151862728383829	na
BALB	no motif/spacing effect	-0.2035560828300227	na
BALB	no motif/spacing effect	-0.2620859832383511	na
BALB	no motif/spacing effect	-0.3639402651854562	na
BALB	no motif/spacing effect	0.1815703052048976	na
BALB	no motif/spacing effect	-0.046619500957621796	na
BALB	no motif/spacing effect	-0.19683928268313533	na
BALB	no motif/spacing effect	-0.6752576739607576	na
BALB	no motif/spacing effect	-0.18564093797425762	na
BALB	no motif/spacing effect	-0.5475444170980963	na
BALB	no motif/spacing effect	-0.21260809880684395	na
BALB	no motif/spacing effect	-0.0032350733053769787	na
BALB	no motif/spacing effect	0.5709508972462527	na
BALB	no motif/spacing effect	-0.15326404028546392	na
BALB	no motif/spacing effect	0.20291220051286274	na
BALB	no motif/spacing effect	2.469797927151374	na
BALB	no motif/spacing effect	0.09073196997623967	na
BALB	no motif/spacing effect	0.6887886653076061	na
BALB	no motif/spacing effect	0.8388655516094037	na
BALB	no motif/spacing effect	-1.001996810063947	na
BALB	no motif/spacing effect	-0.07773837889162127	na
BALB	no motif/spacing effect	-0.442011854457661	na
BALB	no motif/spacing effect	-0.5466774373038197	na
BALB	no motif/spacing effect	-0.22184879021783654	na
BALB	no motif/spacing effect	0.015400461654786035	na
BALB	no motif/spacing effect	0.3031191343872832	na
BALB	no motif/spacing effect	-0.11460503874575778	na
BALB	no motif/spacing effect	-0.12223644851764082	na
BALB	no motif/spacing effect	-0.07184419865330227	na
BALB	no motif/spacing effect	-0.016530104922485744	na
BALB	no motif/spacing effect	0.04686136425790011	na
BALB	no motif/spacing effect	0.11084296573039687	na
BALB	no motif/spacing effect	-0.36815820491015216	na
BALB	no motif/spacing effect	-0.2025061365895917	na
BALB	no motif/spacing effect	-0.11467149927546672	na
BALB	no motif/spacing effect	-0.16617538321190573	na
BALB	no motif/spacing effect	0.04017880815533825	na
BALB	no motif/spacing effect	0.4668236370398695	na
BALB	no motif/spacing effect	0.11876097551520903	na
BALB	no motif/spacing effect	0.19624988627379825	na
BALB	no motif/spacing effect	0.08430279029843657	na
BALB	no motif/spacing effect	-0.18079314762044874	na
BALB	no motif/spacing effect	-0.44293310781699624	na
BALB	no motif/spacing effect	-0.13435097167527754	na
BALB	no motif/spacing effect	0.3867363905154606	na
BALB	no motif/spacing effect	1.0652552920568517	na
BALB	no motif/spacing effect	-0.2849824252491784	na
BALB	no motif/spacing effect	0.20101287760305375	na
BALB	no motif/spacing effect	-0.173743599931794	na
BALB	no motif/spacing effect	-0.15843822025981424	na
BALB	no motif/spacing effect	-0.5833298329717387	na
BALB	no motif/spacing effect	-0.5253913428626493	na
BALB	no motif/spacing effect	-0.052842438102873146	na
BALB	no motif/spacing effect	-0.6752963469427566	na
BALB	no motif/spacing effect	-0.31410963034730344	na
BALB	no motif/spacing effect	-0.22262596360042775	na
BALB	no motif/spacing effect	-0.14174345920863196	na
BALB	no motif/spacing effect	-0.1561842225944936	na
BALB	no motif/spacing effect	-0.037966402037895364	na
BALB	no motif/spacing effect	-0.29178689420698145	na
BALB	no motif/spacing effect	-0.44080147004993364	na
BALB	no motif/spacing effect	-0.3028510943880951	na
BALB	no motif/spacing effect	-0.017725304647195905	na
BALB	no motif/spacing effect	-0.007869833950405969	na
BALB	no motif/spacing effect	-0.43446541259466387	na
BALB	no motif/spacing effect	-0.34761748571044127	na
BALB	no motif/spacing effect	0.5621269641750857	na
BALB	no motif/spacing effect	-0.10292799591752466	na
BALB	no motif/spacing effect	-0.050551587799779085	na
BALB	no motif/spacing effect	0.18613870029755653	na
BALB	no motif/spacing effect	-0.01317324043991519	na
BALB	no motif/spacing effect	-0.24402243730799	na
BALB	no motif/spacing effect	0.08152300747948349	na
BALB	no motif/spacing effect	-0.37043081528639377	na
BALB	no motif/spacing effect	0.0073106452680171685	na
BALB	no motif/spacing effect	-0.5024411178103927	na
BALB	no motif/spacing effect	-0.20087103495709258	na
BALB	no motif/spacing effect	0.0004900958164091307	na
BALB	no motif/spacing effect	-0.42807134543420755	na
BALB	no motif/spacing effect	-0.5576029655660704	na
BALB	no motif/spacing effect	-0.11918633118556432	na
BALB	no motif/spacing effect	-0.16605893835468954	na
BALB	no motif/spacing effect	0.3155687581569415	na
BALB	no motif/spacing effect	-0.10629814164936491	na
BALB	no motif/spacing effect	-0.5029293948195992	na
BALB	no motif/spacing effect	-0.24794265058317322	na
BALB	no motif/spacing effect	-0.5170236720645809	na
BALB	no motif/spacing effect	-0.25744170639111896	na
BALB	no motif/spacing effect	0.2007638109092995	na
BALB	no motif/spacing effect	-0.43429178442634164	na
BALB	no motif/spacing effect	0.1930467824754638	na
BALB	no motif/spacing effect	-0.07618992144670234	na
BALB	no motif/spacing effect	-0.20265167900856262	na
BALB	no motif/spacing effect	0.7612099897323494	na
BALB	no motif/spacing effect	0.0556105475881159	na
BALB	no motif/spacing effect	-0.40949112677220123	na
BALB	no motif/spacing effect	-0.11969979817535537	na
BALB	no motif/spacing effect	0.008539840197844484	na
BALB	no motif/spacing effect	-0.11410620921189807	na
BALB	no motif/spacing effect	-0.22502774168675188	na
BALB	no motif/spacing effect	0.2904534685249902	na
BALB	no motif/spacing effect	-0.10482282495527206	na
BALB	no motif/spacing effect	-0.011956488741009963	na
BALB	no motif/spacing effect	0.07363694442096591	na
BALB	no motif/spacing effect	-0.12553088208385893	na
BALB	no motif/spacing effect	-0.34002158275720173	na
BALB	no motif/spacing effect	-0.00028036179020496377	na
BALB	no motif/spacing effect	0.14936253737309624	na
BALB	no motif/spacing effect	-0.05272502100916565	na
BALB	no motif/spacing effect	-0.5465148815911958	na
BALB	no motif/spacing effect	0.09928343208845014	na
BALB	no motif/spacing effect	0.02621709609644629	na
BALB	no motif/spacing effect	0.8105780842033807	na
BALB	no motif/spacing effect	0.11477377255696286	na
BALB	no motif/spacing effect	0.6415460290875237	na
BALB	no motif/spacing effect	-0.07042537769314361	na
BALB	no motif/spacing effect	-0.2909199849699302	na
BALB	no motif/spacing effect	-0.3262867528083433	na
BALB	no motif/spacing effect	-0.09609604489674695	na
BALB	no motif/spacing effect	-0.18961589595155726	na
BALB	no motif/spacing effect	-0.12159514719032138	na
BALB	no motif/spacing effect	-0.9922133212063864	na
BALB	no motif/spacing effect	4.704370596975285	na
BALB	no motif/spacing effect	-0.6210555032997396	na
BALB	no motif/spacing effect	-0.22463624314476593	na
BALB	no motif/spacing effect	-0.1720368366504923	na
BALB	no motif/spacing effect	-0.6570062955838836	na
BALB	no motif/spacing effect	-0.20789992150436376	na
BALB	no motif/spacing effect	-0.19018085500170923	na
BALB	no motif/spacing effect	0.32318754065996114	na
BALB	no motif/spacing effect	-0.3857589500625753	na
BALB	no motif/spacing effect	-0.09660257593389865	na
BALB	no motif/spacing effect	0.5410631489986422	na
BALB	no motif/spacing effect	0.21952346161854397	na
BALB	no motif/spacing effect	0.5129751767386441	na
BALB	no motif/spacing effect	0.31396471657694525	na
BALB	no motif/spacing effect	0.2980105440767682	na
BALB	no motif/spacing effect	0.009380168170603831	na
BALB	no motif/spacing effect	0.08692022698468271	na
BALB	no motif/spacing effect	-0.5136896818415249	na
BALB	no motif/spacing effect	-0.262271860797628	na
BALB	no motif/spacing effect	-0.18184310947014737	na
BALB	no motif/spacing effect	0.03655638955692808	na
BALB	no motif/spacing effect	-0.3314644791438468	na
BALB	no motif/spacing effect	-0.042142015977881364	na
BALB	no motif/spacing effect	0.03127372323153743	na
BALB	no motif/spacing effect	-0.20120290269732077	na
BALB	no motif/spacing effect	-0.455369593314062	na
BALB	no motif/spacing effect	0.01420546176658899	na
BALB	no motif/spacing effect	-0.04949231019739919	na
BALB	no motif/spacing effect	-0.17451915346911662	na
BALB	no motif/spacing effect	-0.38655809075772485	na
BALB	no motif/spacing effect	0.09571878185218274	na
BALB	no motif/spacing effect	-0.0980444283013	na
BALB	no motif/spacing effect	-0.00859261051605209	na
BALB	no motif/spacing effect	-0.17272768080115597	na
BALB	no motif/spacing effect	-0.40687809699621535	na
BALB	no motif/spacing effect	-0.10768288075093446	na
BALB	no motif/spacing effect	-0.47131457353652007	na
BALB	no motif/spacing effect	0.045853106545891364	na
BALB	no motif/spacing effect	-0.5636601149923521	na
BALB	no motif/spacing effect	0.6088946904241856	na
BALB	no motif/spacing effect	-0.5671638862931356	na
BALB	no motif/spacing effect	0.14661364208181915	na
BALB	no motif/spacing effect	-1.0306657252492575	na
BALB	no motif/spacing effect	-0.32296369542058834	na
BALB	no motif/spacing effect	-0.006944393869797061	na
BALB	no motif/spacing effect	0.1134822481586637	na
BALB	no motif/spacing effect	-0.38966281177498807	na
BALB	no motif/spacing effect	0.3566584938831667	na
BALB	no motif/spacing effect	-0.8299317532573776	na
BALB	no motif/spacing effect	-0.9860259659647341	na
BALB	no motif/spacing effect	-0.17594032885533117	na
BALB	no motif/spacing effect	-0.2131845888326298	na
BALB	no motif/spacing effect	-0.5376628925755513	na
BALB	no motif/spacing effect	0.3193495507855859	na
BALB	no motif/spacing effect	-0.20559798373439087	na
BALB	no motif/spacing effect	-0.15572955028053403	na
BALB	no motif/spacing effect	-0.3017728473172996	na
BALB	no motif/spacing effect	-2.583113737944367	na
BALB	no motif/spacing effect	-0.5557291368095685	na
BALB	no motif/spacing effect	-0.23847022789668149	na
BALB	no motif/spacing effect	-0.109270512934323	na
BALB	no motif/spacing effect	1.9879001663604718	na
BALB	no motif/spacing effect	-2.170461020412212	na
BALB	no motif/spacing effect	-0.4574485751723385	na
BALB	no motif/spacing effect	-0.2319328103703704	na
BALB	no motif/spacing effect	-0.1803506505195216	na
BALB	no motif/spacing effect	0.4795905656744086	na
BALB	no motif/spacing effect	-0.17151640616738906	na
BALB	no motif/spacing effect	-0.5369789642452361	na
BALB	no motif/spacing effect	-0.05519850455429154	na
BALB	no motif/spacing effect	-0.37781474125513803	na
BALB	no motif/spacing effect	0.2102177073903455	na
BALB	no motif/spacing effect	-0.6451970681363424	na
BALB	no motif/spacing effect	0.05416157962342094	na
BALB	no motif/spacing effect	-0.30296667347341444	na
BALB	no motif/spacing effect	-0.25133042053869037	na
BALB	no motif/spacing effect	0.06664665652150781	na
BALB	no motif/spacing effect	-0.22408839037070827	na
BALB	no motif/spacing effect	0.1738240290602051	na
BALB	no motif/spacing effect	-0.3681433054691592	na
BALB	no motif/spacing effect	-0.2561096229535611	na
BALB	no motif/spacing effect	-0.1355011708387872	na
BALB	no motif/spacing effect	-0.26659158336893896	na
BALB	no motif/spacing effect	0.01345890283205975	na
BALB	no motif/spacing effect	-0.03729019396670452	na
BALB	no motif/spacing effect	0.06061559844134834	na
BALB	no motif/spacing effect	-0.015397510713750506	na
BALB	no motif/spacing effect	1.488267256269793	na
BALB	no motif/spacing effect	1.0648828515848543	na
BALB	no motif/spacing effect	2.0314026701885814	na
BALB	no motif/spacing effect	-0.32133008657169615	na
BALB	no motif/spacing effect	0.1720274345725361	na
BALB	no motif/spacing effect	-0.29273523543547686	na
BALB	no motif/spacing effect	-0.6531049895960619	na
BALB	no motif/spacing effect	0.11969803254038025	na
BALB	no motif/spacing effect	-0.3207101167306906	na
BALB	no motif/spacing effect	0.8909597205485671	na
BALB	no motif/spacing effect	-1.6417172790183898	na
BALB	no motif/spacing effect	-0.4690671956520518	na
BALB	no motif/spacing effect	0.014611575831648516	na
BALB	no motif/spacing effect	0.4404609644024724	na
BALB	no motif/spacing effect	0.08876214854771147	na
BALB	no motif/spacing effect	-0.13837042700186952	na
BALB	no motif/spacing effect	-0.3697796131493458	na
BALB	no motif/spacing effect	-0.665241770632961	na
BALB	no motif/spacing effect	-0.25656215509507074	na
BALB	no motif/spacing effect	-0.3883554566263383	na
BALB	no motif/spacing effect	-0.48909839279975476	na
BALB	no motif/spacing effect	-0.30736139789669714	na
BALB	no motif/spacing effect	-0.2830394307813062	na
BALB	no motif/spacing effect	0.03047585789981966	na
BALB	no motif/spacing effect	-0.5851947776196127	na
BALB	no motif/spacing effect	-1.0229639816986613	na
BALB	no motif/spacing effect	-0.14051892899647278	na
BALB	no motif/spacing effect	-0.18050661041782057	na
BALB	no motif/spacing effect	0.2516894322397847	na
BALB	no motif/spacing effect	0.7695161663100043	na
BALB	no motif/spacing effect	-0.5657410927620097	na
BALB	no motif/spacing effect	-0.5042620267988899	na
BALB	no motif/spacing effect	1.7708201940836936	na
BALB	no motif/spacing effect	0.6722472824321954	na
BALB	no motif/spacing effect	-0.863901171963978	na
BALB	no motif/spacing effect	0.10100331868347578	na
BALB	no motif/spacing effect	0.4185372956157236	na
BALB	no motif/spacing effect	0.48469238682263693	na
BALB	no motif/spacing effect	-0.32837350415254485	na
BALB	no motif/spacing effect	0.3398469026115123	na
BALB	no motif/spacing effect	-0.297119979075827	na
BALB	no motif/spacing effect	-0.12026172801826451	na
BALB	no motif/spacing effect	-0.0038740850341829614	na
BALB	no motif/spacing effect	-0.14862261571350865	na
BALB	no motif/spacing effect	-0.26026447907295935	na
BALB	no motif/spacing effect	-0.3129949701173551	na
BALB	no motif/spacing effect	-0.39446300916312627	na
BALB	no motif/spacing effect	-0.12407289633266583	na
BALB	no motif/spacing effect	-0.4747524179210534	na
BALB	no motif/spacing effect	0.020474760610282416	na
BALB	no motif/spacing effect	-0.6304914060697424	na
BALB	no motif/spacing effect	-0.41312466847054363	na
BALB	no motif/spacing effect	-0.35760550745354536	na
BALB	no motif/spacing effect	-0.08809029700082505	na
BALB	no motif/spacing effect	0.7938657113073546	na
BALB	no motif/spacing effect	-0.3267540012485055	na
BALB	no motif/spacing effect	0.17927651347287732	na
BALB	no motif/spacing effect	-0.8692941084080541	na
BALB	no motif/spacing effect	0.10052687595396448	na
BALB	no motif/spacing effect	-0.4166910181313572	na
BALB	no motif/spacing effect	-0.37712560629535385	na
BALB	no motif/spacing effect	-0.013967905364107303	na
BALB	no motif/spacing effect	0.019563536859482866	na
BALB	no motif/spacing effect	-0.16310562141385798	na
BALB	no motif/spacing effect	-0.18797428871340838	na
BALB	no motif/spacing effect	-0.8479969065549495	na
BALB	no motif/spacing effect	1.6300089804980908	na
BALB	no motif/spacing effect	-0.024889276507893854	na
BALB	no motif/spacing effect	-0.6144869633140297	na
BALB	no motif/spacing effect	0.03985598881411345	na
BALB	no motif/spacing effect	0.7468599441058599	na
BALB	no motif/spacing effect	-0.5611955911459248	na
BALB	no motif/spacing effect	0.38181903330198086	na
BALB	no motif/spacing effect	-0.2756344426134274	na
BALB	no motif/spacing effect	-0.23184930543001148	na
BALB	no motif/spacing effect	-0.3340579579913836	na
BALB	no motif/spacing effect	0.047785033834903956	na
BALB	no motif/spacing effect	-0.2471910217980131	na
BALB	no motif/spacing effect	1.4528310675656164	na
BALB	no motif/spacing effect	-0.15021564388588882	na
BALB	no motif/spacing effect	-0.6306751406875968	na
BALB	no motif/spacing effect	-0.4321371864025476	na
BALB	no motif/spacing effect	-0.631578401411196	na
BALB	no motif/spacing effect	-0.014452460516483079	na
BALB	no motif/spacing effect	-0.5066491468030563	na
BALB	no motif/spacing effect	-0.18345787610467745	na
BALB	no motif/spacing effect	-0.24981240290428097	na
BALB	no motif/spacing effect	-0.19104703123931	na
BALB	no motif/spacing effect	-0.2595778122883381	na
BALB	no motif/spacing effect	-0.2439511793774205	na
BALB	no motif/spacing effect	-0.4945208703983912	na
BALB	no motif/spacing effect	-0.33072665555900027	na
BALB	no motif/spacing effect	-0.13118141469956957	na
BALB	no motif/spacing effect	-0.02651192439359029	na
BALB	no motif/spacing effect	-0.34158420765527175	na
BALB	no motif/spacing effect	-0.19772535307334227	na
BALB	no motif/spacing effect	-0.262246858215593	na
BALB	no motif/spacing effect	0.056053710130193224	na
BALB	no motif/spacing effect	-0.4474722503947577	na
BALB	no motif/spacing effect	0.1615779315861685	na
BALB	no motif/spacing effect	-0.04050461232503633	na
BALB	no motif/spacing effect	0.09132939794619599	na
BALB	no motif/spacing effect	-0.6827083152333566	na
BALB	no motif/spacing effect	-0.6133857229390269	na
BALB	no motif/spacing effect	0.04981172417169155	na
BALB	no motif/spacing effect	0.11142128266842288	na
BALB	no motif/spacing effect	0.2696139242910709	na
BALB	no motif/spacing effect	-0.30172654133459353	na
BALB	no motif/spacing effect	-0.10073654892345463	na
BALB	no motif/spacing effect	-0.713404698438497	na
BALB	no motif/spacing effect	-0.18807418926298602	na
BALB	no motif/spacing effect	-0.22451607404754803	na
BALB	no motif/spacing effect	0.17182079020510788	na
BALB	no motif/spacing effect	-0.6761273846899787	na
BALB	no motif/spacing effect	-0.06610448715276451	na
BALB	no motif/spacing effect	-0.13183469947701187	na
BALB	no motif/spacing effect	0.02784182769599841	na
BALB	no motif/spacing effect	0.83117908915666	na
BALB	no motif/spacing effect	-0.027887808229306366	na
BALB	no motif/spacing effect	-0.20997769601483718	na
BALB	no motif/spacing effect	0.23513166396858498	na
BALB	no motif/spacing effect	0.28840406074782665	na
BALB	no motif/spacing effect	-0.5086145065139771	na
BALB	no motif/spacing effect	-0.6919259141927636	na
BALB	no motif/spacing effect	-0.10616555721692783	na
BALB	no motif/spacing effect	0.27313996080309355	na
BALB	no motif/spacing effect	-0.3234223415676927	na
BALB	no motif/spacing effect	-0.5681542130346022	na
BALB	no motif/spacing effect	-1.701880252500307	na
BALB	no motif/spacing effect	-0.20133611729401668	na
BALB	no motif/spacing effect	-0.22510074636698274	na
BALB	no motif/spacing effect	-0.12908932142644414	na
BALB	no motif/spacing effect	-0.23068674171471493	na
BALB	no motif/spacing effect	0.00010600257469128849	na
BALB	no motif/spacing effect	0.09448760646317389	na
BALB	no motif/spacing effect	-0.26055238158688443	na
BALB	no motif/spacing effect	-0.25037820346720885	na
BALB	no motif/spacing effect	-0.015046168308544772	na
BALB	no motif/spacing effect	-0.3274597779431092	na
BALB	no motif/spacing effect	0.72931593313568	na
BALB	no motif/spacing effect	-0.15615493695743243	na
BALB	no motif/spacing effect	0.27913882192993134	na
BALB	no motif/spacing effect	-0.16406486176142465	na
BALB	no motif/spacing effect	0.7933405049281479	na
BALB	no motif/spacing effect	-0.19261827375758944	na
BALB	no motif/spacing effect	-0.5789563003699092	na
BALB	no motif/spacing effect	-0.20284880304926922	na
BALB	no motif/spacing effect	-0.4873368385360157	na
BALB	no motif/spacing effect	-0.2531408715924659	na
BALB	no motif/spacing effect	-0.6585655907611541	na
BALB	no motif/spacing effect	-0.45402756695929103	na
BALB	no motif/spacing effect	0.3464723489786836	na
BALB	no motif/spacing effect	-0.3359463291465028	na
BALB	no motif/spacing effect	-0.21539104072966708	na
BALB	no motif/spacing effect	0.12661777502513694	na
BALB	no motif/spacing effect	-0.15675523295298177	na
BALB	no motif/spacing effect	-0.21660392744991164	na
BALB	no motif/spacing effect	-1.2760920640154882	na
BALB	no motif/spacing effect	-0.08957058081035907	na
BALB	no motif/spacing effect	0.2848677223914644	na
BALB	no motif/spacing effect	-0.4462594031621041	na
BALB	no motif/spacing effect	0.10430473648584382	na
BALB	no motif/spacing effect	0.933724566008939	na
BALB	no motif/spacing effect	0.8442159739205861	na
BALB	no motif/spacing effect	1.1361056636641154	na
BALB	no motif/spacing effect	1.5754959638624353	na
BALB	no motif/spacing effect	-1.4816517834788603	na
BALB	no motif/spacing effect	0.12045075344611433	na
BALB	no motif/spacing effect	-0.27713126596521676	na
BALB	no motif/spacing effect	-0.08316837254510645	na
BALB	no motif/spacing effect	-0.06703540856206036	na
BALB	no motif/spacing effect	0.1400856523697822	na
BALB	no motif/spacing effect	0.4593300239722158	na
BALB	no motif/spacing effect	2.58760722197672	na
BALB	no motif/spacing effect	0.2998739862331221	na
BALB	no motif/spacing effect	-0.31798972652774715	na
BALB	no motif/spacing effect	0.6891582032840757	na
BALB	no motif/spacing effect	-0.32362617734191534	na
BALB	no motif/spacing effect	-0.28877501763898916	na
BALB	no motif/spacing effect	1.3340914038140306	na
BALB	no motif/spacing effect	-0.214383309834008	na
BALB	no motif/spacing effect	-0.6254034267496538	na
BALB	no motif/spacing effect	-0.17621346562268236	na
BALB	no motif/spacing effect	-0.1969011826299205	na
BALB	no motif/spacing effect	0.02479599673180033	na
BALB	no motif/spacing effect	0.4123965021980789	na
BALB	no motif/spacing effect	-1.3180873251541145	na
BALB	no motif/spacing effect	-0.4210715007852812	na
BALB	no motif/spacing effect	-0.21297400104876107	na
BALB	no motif/spacing effect	-0.3276671005859111	na
BALB	no motif/spacing effect	-0.15644095376069167	na
BALB	no motif/spacing effect	-0.11086714590689972	na
BALB	no motif/spacing effect	-0.0385475804892188	na
BALB	no motif/spacing effect	-0.12365227856989769	na
BALB	no motif/spacing effect	-0.47937629019142847	na
BALB	no motif/spacing effect	-0.0299769326995456	na
BALB	no motif/spacing effect	0.1486824820944852	na
BALB	no motif/spacing effect	0.18664452932254516	na
BALB	no motif/spacing effect	0.11226623225091215	na
BALB	no motif/spacing effect	-0.004969995367134494	na
BALB	no motif/spacing effect	-0.8857693753425684	na
BALB	no motif/spacing effect	-0.04350821509918301	na
BALB	no motif/spacing effect	-0.3175389118299101	na
BALB	no motif/spacing effect	-0.26178290577898977	na
BALB	no motif/spacing effect	0.6626244733508757	na
BALB	no motif/spacing effect	-0.9443158674223215	na
BALB	no motif/spacing effect	-0.9042204897498989	na
BALB	no motif/spacing effect	-0.3356585683014375	na
BALB	no motif/spacing effect	0.042809214027696996	na
BALB	no motif/spacing effect	-0.020094854368111648	na
BALB	no motif/spacing effect	1.925464591843559	na
BALB	no motif/spacing effect	0.13911945643049695	na
BALB	no motif/spacing effect	0.28717937886724343	na
BALB	no motif/spacing effect	1.6109509713250807	na
BALB	no motif/spacing effect	1.54869524744577	na
BALB	no motif/spacing effect	1.6548371318390291	na
BALB	no motif/spacing effect	0.2396330328913301	na
BALB	no motif/spacing effect	0.6334173833535264	na
BALB	no motif/spacing effect	-0.24663159634472187	na
BALB	no motif/spacing effect	0.04851016698417876	na
BALB	no motif/spacing effect	0.4403169077272011	na
BALB	no motif/spacing effect	0.07908984796506413	na
BALB	no motif/spacing effect	-0.40333013084895386	na
BALB	no motif/spacing effect	-0.2179919294155468	na
BALB	no motif/spacing effect	0.8335506348585753	na
BALB	no motif/spacing effect	-0.12086971833568505	na
BALB	no motif/spacing effect	0.05103368557401122	na
BALB	no motif/spacing effect	-0.5470173476107085	na
BALB	no motif/spacing effect	-0.014701707524972463	na
BALB	no motif/spacing effect	-0.23085532567747702	na
BALB	no motif/spacing effect	-0.01726582782463648	na
BALB	no motif/spacing effect	-0.1353782385323976	na
BALB	no motif/spacing effect	-0.6641593138107371	na
BALB	no motif/spacing effect	-0.7146418436348894	na
BALB	no motif/spacing effect	-0.2313255461064554	na
BALB	no motif/spacing effect	-0.5566081091906936	na
BALB	no motif/spacing effect	-0.06891035661586464	na
BALB	no motif/spacing effect	1.0172700363654559	na
BALB	no motif/spacing effect	0.07669329898378852	na
BALB	no motif/spacing effect	-0.12520461726541487	na
BALB	no motif/spacing effect	0.20696399327242698	na
BALB	no motif/spacing effect	-0.8297008071301226	na
BALB	no motif/spacing effect	-0.38526339220317674	na
BALB	no motif/spacing effect	-1.4955255881450595	na
BALB	no motif/spacing effect	-0.6780132005067867	na
BALB	no motif/spacing effect	-0.7343841664304809	na
BALB	no motif/spacing effect	-0.10196649980567685	na
BALB	no motif/spacing effect	-0.27412088501020726	na
BALB	no motif/spacing effect	-0.07415139937001669	na
BALB	no motif/spacing effect	0.14336417517117717	na
BALB	no motif/spacing effect	-0.3382358998312407	na
BALB	no motif/spacing effect	-0.34502949807557304	na
BALB	no motif/spacing effect	-0.06960827986106377	na
BALB	no motif/spacing effect	0.42097501297232975	na
BALB	no motif/spacing effect	-1.0668122114370329	na
BALB	no motif/spacing effect	-0.182006093985688	na
BALB	no motif/spacing effect	-0.5902139748181012	na
BALB	no motif/spacing effect	-0.3409773158833991	na
BALB	no motif/spacing effect	-0.41375534782186296	na
BALB	no motif/spacing effect	0.5078826597991588	na
BALB	no motif/spacing effect	-0.6292752061781246	na
BALB	no motif/spacing effect	-0.11170641536825521	na
BALB	no motif/spacing effect	-0.1238585262980827	na
BALB	no motif/spacing effect	-0.04382383846629789	na
BALB	no motif/spacing effect	-0.20872436357155433	na
BALB	no motif/spacing effect	1.1338892545338164	na
BALB	no motif/spacing effect	0.25657865243322675	na
BALB	no motif/spacing effect	0.06434152018242756	na
BALB	no motif/spacing effect	-0.008238084676790436	na
BALB	no motif/spacing effect	0.28771667274591106	na
BALB	no motif/spacing effect	0.09208439899071763	na
BALB	no motif/spacing effect	-1.0696543838913528	na
BALB	no motif/spacing effect	0.16375482028571042	na
BALB	no motif/spacing effect	-0.5439491183479293	na
BALB	no motif/spacing effect	0.4859558682619376	na
BALB	no motif/spacing effect	-0.06433785689801752	na
BALB	no motif/spacing effect	-0.06883326867175121	na
BALB	no motif/spacing effect	-0.035942635623519514	na
BALB	no motif/spacing effect	-0.20559458332001146	na
BALB	no motif/spacing effect	-0.04423468995778457	na
BALB	no motif/spacing effect	-0.23180541575068325	na
BALB	no motif/spacing effect	-0.1198167045995806	na
BALB	no motif/spacing effect	0.17778300819413229	na
BALB	no motif/spacing effect	0.018233355377010874	na
BALB	no motif/spacing effect	0.2981528070842625	na
BALB	no motif/spacing effect	-0.11873502611414999	na
BALB	no motif/spacing effect	-0.14110302509543082	na
BALB	no motif/spacing effect	-0.12786680495248515	na
BALB	no motif/spacing effect	-0.24474163875205424	na
BALB	no motif/spacing effect	-0.32097759850453045	na
BALB	no motif/spacing effect	-0.031842547090351836	na
BALB	no motif/spacing effect	0.3283059482994233	na
BALB	no motif/spacing effect	-0.4181754684929144	na
BALB	no motif/spacing effect	-0.538222558796261	na
BALB	no motif/spacing effect	-0.4488863221213535	na
BALB	no motif/spacing effect	-0.06455331929701558	na
BALB	no motif/spacing effect	0.10515113521165542	na
BALB	no motif/spacing effect	-0.397105659239835	na
BALB	no motif/spacing effect	-0.44491917154829075	na
BALB	no motif/spacing effect	-0.18806138856687493	na
BALB	no motif/spacing effect	-0.5208321633014412	na
BALB	no motif/spacing effect	0.4725477087187686	na
BALB	no motif/spacing effect	-0.2488761377522657	na
BALB	no motif/spacing effect	-0.08489924325019249	na
BALB	no motif/spacing effect	0.1048088716290545	na
BALB	no motif/spacing effect	-0.04103364525899433	na
BALB	no motif/spacing effect	0.07524763508468091	na
BALB	no motif/spacing effect	-0.18989733980539203	na
BALB	no motif/spacing effect	-0.40893772256118943	na
BALB	no motif/spacing effect	-0.1311957451224144	na
BALB	no motif/spacing effect	0.21331175588745221	na
BALB	no motif/spacing effect	-0.018567760039271852	na
BALB	no motif/spacing effect	-0.2617912389831618	na
BALB	no motif/spacing effect	-0.05536470832154183	na
BALB	no motif/spacing effect	-0.13365809028365483	na
BALB	no motif/spacing effect	-0.6617592499770324	na
BALB	no motif/spacing effect	-0.30789082271042467	na
BALB	no motif/spacing effect	-0.1769447334089964	na
BALB	no motif/spacing effect	-0.5800846233494941	na
BALB	no motif/spacing effect	-0.34990563801405505	na
BALB	no motif/spacing effect	-0.14819693150078006	na
BALB	no motif/spacing effect	0.09590929114496483	na
BALB	no motif/spacing effect	0.34496841331455386	na
BALB	no motif/spacing effect	-0.29442482498134037	na
BALB	no motif/spacing effect	-0.11420588657488384	na
BALB	no motif/spacing effect	-0.3487088711178483	na
BALB	no motif/spacing effect	-0.4135390198041735	na
BALB	no motif/spacing effect	-0.12225017835496299	na
BALB	no motif/spacing effect	0.11378830255421679	na
BALB	no motif/spacing effect	-0.747289236017882	na
BALB	no motif/spacing effect	0.12150100504770656	na
BALB	no motif/spacing effect	0.2783518162462477	na
BALB	no motif/spacing effect	-0.09946180194122967	na
BALB	no motif/spacing effect	-0.1671237211271297	na
BALB	no motif/spacing effect	-0.02760140561744162	na
BALB	no motif/spacing effect	-0.249581825193804	na
BALB	no motif/spacing effect	-0.33168118788135903	na
BALB	no motif/spacing effect	-0.7034076886554064	na
BALB	no motif/spacing effect	-0.4650894744925189	na
BALB	no motif/spacing effect	-0.19747313972451241	na
BALB	no motif/spacing effect	0.2152520625015617	na
BALB	no motif/spacing effect	-0.4337800870355366	na
BALB	no motif/spacing effect	-0.4551419812931261	na
BALB	no motif/spacing effect	-0.09843890820214085	na
BALB	no motif/spacing effect	0.04778620180375093	na
BALB	no motif/spacing effect	1.2137680277642264	na
BALB	no motif/spacing effect	0.16048479430492257	na
BALB	no motif/spacing effect	1.3677603185347813	na
BALB	no motif/spacing effect	-0.02551173562218345	na
BALB	no motif/spacing effect	-0.5016206484038239	na
BALB	no motif/spacing effect	-1.0065710783088027	na
BALB	no motif/spacing effect	0.5203710173678711	na
BALB	no motif/spacing effect	1.8244994499148934	na
BALB	no motif/spacing effect	1.0313951962755343	na
BALB	no motif/spacing effect	0.34529208795287225	na
BALB	no motif/spacing effect	0.012154200284628658	na
BALB	no motif/spacing effect	0.07195222985853444	na
BALB	no motif/spacing effect	-0.16447661871886776	na
BALB	no motif/spacing effect	0.11543753988412142	na
BALB	no motif/spacing effect	-0.3025053436082077	na
BALB	no motif/spacing effect	-0.26189382268049144	na
BALB	no motif/spacing effect	0.4536037938083508	na
BALB	no motif/spacing effect	0.22979499997371367	na
BALB	no motif/spacing effect	-0.5193741590935801	na
BALB	no motif/spacing effect	-0.04965516013431426	na
BALB	no motif/spacing effect	0.1318163505829597	na
BALB	no motif/spacing effect	-0.24978833778393827	na
BALB	no motif/spacing effect	-0.31427085718832615	na
BALB	no motif/spacing effect	-0.04631699827400926	na
BALB	no motif/spacing effect	-0.11329232575471515	na
BALB	no motif/spacing effect	-0.1598481582114868	na
BALB	no motif/spacing effect	0.4230522421936458	na
BALB	no motif/spacing effect	-0.3273405739563344	na
BALB	no motif/spacing effect	0.7732412372899331	na
BALB	no motif/spacing effect	0.2824819507723211	na
BALB	no motif/spacing effect	0.6354205397493753	na
BALB	no motif/spacing effect	-0.5677987088952476	na
BALB	no motif/spacing effect	-0.1232577137801405	na
BALB	no motif/spacing effect	0.6973769657701617	na
BALB	no motif/spacing effect	0.0967762942445054	na
BALB	no motif/spacing effect	-0.24103357891181432	na
BALB	no motif/spacing effect	-0.5013530680704017	na
[truncated: 74,553 more rows]
