# Supplementary material for: Systematic analysis of naturally occurring insertions and deletions that alter transcription factor spacing identifies tolerant and sensitive transcription factor pairs
Source: eLife. 2022 Jan 20;11:e70878. doi: 10.7554/eLife.70878 (PMC8809895; doi:10.7554/eLife.70878)
Supplement: Figure 3—source data 2. [file elife-70878-fig3-data2.csv]

strain	group	Log2 CEBPB fold change	Change of PWM score or spacing
BALB	mutated PU.1 motif	-0.4142696706892517	3.3483290000000014
BALB	mutated PU.1 motif	0.1616613192341383	-3.639792
BALB	mutated PU.1 motif	-5.577482397092098	-4.719585999999998
BALB	mutated PU.1 motif	-1.1417972621600683	-5.4834369999999995
BALB	mutated PU.1 motif	-5.3232191861194735	-6.5480979999999995
BALB	mutated PU.1 motif	-1.5299694858938366	-3.0432159999999975
BALB	mutated PU.1 motif	-2.493686116920828	-6.658211400000002
BALB	mutated PU.1 motif	6.392960720926295	6.658213
BALB	mutated PU.1 motif	-1.0240023305272756	3.7944226
BALB	mutated PU.1 motif	-0.21769727822155982	-2.4774650000000005
BALB	mutated PU.1 motif	-0.6783908888403456	3.4529404999999986
BALB	mutated PU.1 motif	2.806259527786564	3.6397924999999995
BALB	mutated PU.1 motif	0.35283489023288883	2.3197829999999993
BALB	mutated PU.1 motif	3.2505929068730257	2.1461360000000003
BALB	mutated PU.1 motif	1.576376282603006	2.057546500000001
BALB	mutated PU.1 motif	-0.7867684727920743	-6.020700999999997
BALB	mutated PU.1 motif	-2.499789356253438	-3.6212190000000017
BALB	mutated PU.1 motif	-1.5741388304316128	-3.1658299999999997
BALB	mutated PU.1 motif	-0.29904557196908055	-3.7140379999999986
BALB	mutated PU.1 motif	-0.8689189310213736	-3.5432360000000003
BALB	mutated PU.1 motif	0.8006693017499509	3.8131717000000016
BALB	mutated PU.1 motif	-0.031266240200425344	3.6805290000000017
BALB	mutated PU.1 motif	-3.9832936672676	-8.3822802
BALB	mutated PU.1 motif	-2.067077573811085	-3.452940999999999
BALB	mutated PU.1 motif	1.864875852887623	2.3176184000000006
BALB	mutated PU.1 motif	-0.4836737394541224	-2.1069770000000005
BALB	mutated PU.1 motif	4.699646810706519	6.658211999999997
BALB	mutated PU.1 motif	-4.681004539428367	2.1178880000000007
BALB	mutated PU.1 motif	3.175782819980952	6.548099
BALB	mutated PU.1 motif	-3.5070685083913578	-4.411154299999999
BALB	mutated PU.1 motif	-5.404846480871694	-2.4774645
BALB	mutated PU.1 motif	2.3028673609728743	2.2419469999999997
BALB	mutated PU.1 motif	-4.077497561157545	-6.947585699999999
BALB	mutated PU.1 motif	-1.7244854385902535	3.6397924999999987
BALB	mutated PU.1 motif	-1.538051439144592	-6.546352999999998
BALB	mutated PU.1 motif	-0.9725722672297161	2.144004
BALB	mutated PU.1 motif	1.042052381560393	2.8743039999999986
BALB	mutated PU.1 motif	2.7886690459155807	3.639792
BALB	mutated PU.1 motif	3.0092629213289674	5.276900000000001
BALB	mutated PU.1 motif	-0.9360513642270467	-3.348328000000002
BALB	mutated PU.1 motif	-0.8341677531915712	-3.3483300000000007
BALB	mutated PU.1 motif	0.6102547864085857	3.639791599999999
BALB	mutated PU.1 motif	1.5656126058302244	2.756804700000001
BALB	mutated PU.1 motif	-2.382674695090989	-3.4529414999999988
BALB	mutated PU.1 motif	-1.4589996524558506	-2.4059363000000005
BALB	mutated PU.1 motif	-4.24764729686683	-5.137747999999998
BALB	mutated PU.1 motif	3.3345818956977675	6.548099000000001
BALB	mutated PU.1 motif	-0.4499871579149497	-3.461973999999998
BALB	mutated PU.1 motif	3.7872089387445045	3.680529
BALB	mutated PU.1 motif	-0.6249691715133077	-4.374306600000001
BALB	mutated PU.1 motif	-1.0964081850304668	3.348329999999999
BALB	mutated PU.1 motif	-4.5579051362224	-4.723737000000002
BALB	mutated PU.1 motif	2.034785864374081	6.6582116
BALB	mutated PU.1 motif	2.891955082877531	4.478171000000001
BALB	mutated PU.1 motif	0.3490868500210862	4.671308999999999
BALB	mutated PU.1 motif	2.714476953130117	4.802497000000001
BALB	mutated PU.1 motif	-1.2318090514096731	-2.6221460000000008
BALB	mutated PU.1 motif	-0.785958076003022	-3.639792
BALB	mutated PU.1 motif	-3.6861238872280073	-3.5799319999999986
BALB	mutated PU.1 motif	-4.41416181182198	-3.639792
BALB	mutated PU.1 motif	-1.5066302547616424	-3.680529
BALB	mutated PU.1 motif	1.0	6.447458
BALB	mutated PU.1 motif	-4.620785760326575	-2.019154000000002
BALB	mutated PU.1 motif	-2.7862516730728033	-6.658210000000002
BALB	mutated PU.1 motif	-1.189334132757153	-4.4018926
BALB	mutated PU.1 motif	1.5030911340524753	-3.1723800000000004
BALB	mutated PU.1 motif	-1.771255882538517	-2.8100933999999986
BALB	mutated PU.1 motif	0.2239817608107897	2.9468330000000007
BALB	mutated PU.1 motif	1.8339813915684111	3.452942
BALB	mutated PU.1 motif	2.059632785780301	3.9654370000000005
BALB	mutated PU.1 motif	-3.3067221873368213	-3.6805290000000017
BALB	mutated PU.1 motif	-1.3857325796297308	-3.452941000000001
BALB	mutated C/EBPβ motif	2.148379880271838	4.9726624
BALB	mutated C/EBPβ motif	2.941133315317852	3.5333395999999997
BALB	mutated C/EBPβ motif	-5.577482397092098	-2.6088319999999996
BALB	mutated C/EBPβ motif	2.1413558492455413	3.3673162000000003
BALB	mutated C/EBPβ motif	-3.747812976403199	-9.2291512
BALB	mutated C/EBPβ motif	-1.4406750937424349	-2.6877150000000003
BALB	mutated C/EBPβ motif	-2.650023487460733	-2.6088316999999996
BALB	mutated C/EBPβ motif	-0.8937461455994473	-6.3597413
BALB	mutated C/EBPβ motif	-3.621821920980305	-6.173249
BALB	mutated C/EBPβ motif	-1.4776862596301203	-3.4783269999999993
BALB	mutated C/EBPβ motif	2.560851936533155	6.207037639999999
BALB	mutated C/EBPβ motif	-1.7672997384234885	-6.3597409
BALB	mutated C/EBPβ motif	-1.4966433266258772	-6.546658549999999
BALB	mutated C/EBPβ motif	0.2786717297564927	2.608831500000001
BALB	mutated C/EBPβ motif	-2.7543833277599843	-3.2785914000000003
BALB	mutated C/EBPβ motif	-0.7241206976991004	-5.980286800000001
BALB	mutated C/EBPβ motif	-5.25953784376958	-6.190177500000001
BALB	mutated C/EBPβ motif	0.5420353916764613	6.546658559999999
BALB	mutated C/EBPβ motif	3.4802035618129015	2.3638303999999994
BALB	mutated C/EBPβ motif	1.8215844674126194	7.5850017
BALB	mutated C/EBPβ motif	-2.262100061045969	-4.1944405
BALB	mutated C/EBPβ motif	-2.8838744942010326	-5.171652300000001
BALB	mutated C/EBPβ motif	2.416877942640314	2.2161077999999996
BALB	mutated C/EBPβ motif	-2.9976970779878114	-2.2338369999999994
BALB	mutated C/EBPβ motif	-1.5710300405250774	-3.2218736000000003
BALB	mutated C/EBPβ motif	-2.4601417012193414	-4.760397
BALB	mutated C/EBPβ motif	1.1966712876707746	3.2218730000000004
BALB	mutated C/EBPβ motif	2.599906359616374	2.6088317000000014
BALB	mutated C/EBPβ motif	4.256132436265308	3.6435873999999995
BALB	mutated C/EBPβ motif	-4.681004539428367	-6.4947766
BALB	mutated C/EBPβ motif	0.15646768173534387	2.2493109999999987
BALB	mutated C/EBPβ motif	1.5768039773339915	3.270728
BALB	mutated C/EBPβ motif	-0.214942768426452	3.4783275000000002
BALB	mutated C/EBPβ motif	-3.0910776917005576	-2.6088322999999995
BALB	mutated C/EBPβ motif	0.6127644659597316	6.494776700000001
BALB	mutated C/EBPβ motif	-1.5555444546835417	-3.270726
BALB	mutated C/EBPβ motif	2.3028673609728743	5.3170098
BALB	mutated C/EBPβ motif	-2.2053383612695003	-2.4920790000000004
BALB	mutated C/EBPβ motif	2.432728825097825	2.6088310000000003
BALB	mutated C/EBPβ motif	-0.9725722672297161	-3.270726500000001
BALB	mutated C/EBPβ motif	-3.3284195919232453	-3.2218739999999997
BALB	mutated C/EBPβ motif	3.389992369832516	5.8454045
BALB	mutated C/EBPβ motif	-0.015793022953601188	2.1253249999999992
BALB	mutated C/EBPβ motif	1.8621165792471537	3.2218735999999986
BALB	mutated C/EBPβ motif	-6.189313986550502	-5.4344149999999996
BALB	mutated C/EBPβ motif	0.024828136843933812	6.3597415
BALB	mutated C/EBPβ motif	-2.396507216483978	-6.4734184
BALB	mutated C/EBPβ motif	0.8504492477090682	6.5004499
BALB	mutated C/EBPβ motif	-2.7499583787128934	-3.9316824000000006
BALB	mutated C/EBPβ motif	-3.096716429928164	-3.221873
BALB	mutated C/EBPβ motif	-3.9185148799536687	-8.0729638
BALB	mutated C/EBPβ motif	-1.4939527444206395	-3.2218740000000006
BALB	mutated C/EBPβ motif	-4.424598137586939	-3.0764839999999993
BALB	mutated C/EBPβ motif	-6.029103489300522	-6.494776999999999
BALB	mutated C/EBPβ motif	2.3142103411372505	2.2449390000000005
BALB	mutated C/EBPβ motif	-1.4235917977530113	-4.029643
BALB	mutated C/EBPβ motif	3.7872089387445045	2.1053504
BALB	mutated C/EBPβ motif	0.740426825168778	3.221873000000002
BALB	mutated C/EBPβ motif	-4.295661753593002	-6.494777
BALB	mutated C/EBPβ motif	2.3801934128837248	3.0508294000000014
BALB	mutated C/EBPβ motif	-0.20428492265123221	2.608831999999998
BALB	mutated C/EBPβ motif	-3.3830493622593627	-4.791602999999999
BALB	mutated C/EBPβ motif	-2.1795247186928757	-3.2218729999999987
BALB	mutated C/EBPβ motif	-0.28147785251480606	2.608831000000002
BALB	mutated C/EBPβ motif	4.993216467741336	5.0012175
BALB	mutated C/EBPβ motif	-0.10558296090651353	-4.703658000000003
BALB	mutated C/EBPβ motif	-7.122362116711442	-5.1392338
BALB	mutated C/EBPβ motif	0.6500917549593854	2.435802
BALB	mutated C/EBPβ motif	0.7861870949923064	-2.5206802999999987
BALB	mutated C/EBPβ motif	-0.2774962229731788	2.4678414
BALB	mutated C/EBPβ motif	-3.9843081917125076	-6.494776
BALB	mutated C/EBPβ motif	2.6306707102158544	3.221873499999999
BALB	mutated C/EBPβ motif	3.4331451113353944	6.4667393
BALB	mutated C/EBPβ motif	1.5568217052489972	3.2218740000000015
BALB	mutated C/EBPβ motif	-1.2412712365049705	3.2218737000000006
BALB	mutated C/EBPβ motif	4.241713090665774	2.6088322999999987
BALB	mutated C/EBPβ motif	-2.917968122563726	-9.098437
BALB	mutated C/EBPβ motif	-3.5376439619298847	-3.0084496
BALB	mutated C/EBPβ motif	-0.9141709887096283	-3.941857500000001
BALB	mutated C/EBPβ motif	-3.3594870305162834	-3.799822999999999
BALB	mutated C/EBPβ motif	-3.2726911671126944	-2.6088320000000014
BALB	mutated C/EBPβ motif	-0.39139519695991876	2.2239649999999997
BALB	mutated MAGGIE motif	-1.876195382136637	-8.467648
BALB	mutated MAGGIE motif	-0.6107675265931976	2.8869023000000005
BALB	mutated MAGGIE motif	-0.9834142096234952	-3.7560998000000003
BALB	mutated MAGGIE motif	-3.945321435937821	-4.3792084
BALB	mutated MAGGIE motif	-0.5237986380427606	-4.5539952
BALB	mutated MAGGIE motif	-2.445813629854025	-6.6384478
BALB	mutated MAGGIE motif	1.446683125895309	2.0455380000000005
BALB	mutated MAGGIE motif	-0.4142696706892517	5.861530999999999
BALB	mutated MAGGIE motif	-0.9461347423365885	-3.0260949999999998
BALB	mutated MAGGIE motif	-2.2921880956766176	-5.02135343
BALB	mutated MAGGIE motif	0.1616613192341383	-3.909256000000001
BALB	mutated MAGGIE motif	-0.5169261949567261	6.658211000000001
BALB	mutated MAGGIE motif	2.5890707950234013	5.507973
BALB	mutated MAGGIE motif	-1.3146205017637795	-2.220936
BALB	mutated MAGGIE motif	2.148379880271838	5.574779
BALB	mutated MAGGIE motif	1.8593847903770861	-4.0346937
BALB	mutated MAGGIE motif	2.941133315317852	-5.7984683
BALB	mutated MAGGIE motif	-0.09937013785473692	3.8255775000000005
BALB	mutated MAGGIE motif	-0.8532367248120627	2.576338
BALB	mutated MAGGIE motif	-5.07052635548716	6.6582110000000005
BALB	mutated MAGGIE motif	-5.577482397092098	-5.96705
BALB	mutated MAGGIE motif	0.6591225908471845	3.424434999999999
BALB	mutated MAGGIE motif	-3.1752827542069393	6.538054
BALB	mutated MAGGIE motif	0.32354001227276363	-5.537061900000001
BALB	mutated MAGGIE motif	0.4824728732553374	-7.85442617
BALB	mutated MAGGIE motif	1.0624489485825874	-2.8804182999999988
BALB	mutated MAGGIE motif	2.1413558492455413	-5.3786932
BALB	mutated MAGGIE motif	-3.747812976403199	-9.0104149
BALB	mutated MAGGIE motif	-1.4406750937424349	3.0856600999999992
BALB	mutated MAGGIE motif	-0.07718911648092419	-3.7095026999999994
BALB	mutated MAGGIE motif	-0.958001253852073	-3.9341123
BALB	mutated MAGGIE motif	-2.650023487460733	-5.123425
BALB	mutated MAGGIE motif	-0.2344527497256621	5.452551
BALB	mutated MAGGIE motif	-0.8937461455994473	-6.557754000000001
BALB	mutated MAGGIE motif	-1.2853204357471855	-7.198354300000001
BALB	mutated MAGGIE motif	-0.9848529613489898	-6.65821
BALB	mutated MAGGIE motif	0.2511867811912669	2.7513232000000003
BALB	mutated MAGGIE motif	1.908085770095635	-5.348989999999999
BALB	mutated MAGGIE motif	-3.621821920980305	-6.658211499999999
BALB	mutated MAGGIE motif	1.4749233645552597	-4.738828499999999
BALB	mutated MAGGIE motif	0.3227606422772267	6.4393019
BALB	mutated MAGGIE motif	-0.6561200777605283	6.558534999999999
BALB	mutated MAGGIE motif	-1.4776862596301203	-3.5480164999999992
BALB	mutated MAGGIE motif	-0.9556767586091102	5.512724469999999
BALB	mutated MAGGIE motif	2.5754965285272	5.7100286
BALB	mutated MAGGIE motif	-1.7975200699083107	-6.273413
BALB	mutated MAGGIE motif	-0.3786915688707433	-2.2473335000000008
BALB	mutated MAGGIE motif	2.560851936533155	6.1317076
BALB	mutated MAGGIE motif	-1.2239220504327957	-10.308457
BALB	mutated MAGGIE motif	-5.3232191861194735	-6.658211000000002
BALB	mutated MAGGIE motif	-1.7672997384234885	-6.5577548000000006
BALB	mutated MAGGIE motif	-1.6852505576220507	4.4198307
BALB	mutated MAGGIE motif	-1.5299694858938366	-6.379494000000001
BALB	mutated MAGGIE motif	-0.7637218258875471	-5.838636800000001
BALB	mutated MAGGIE motif	-2.493686116920828	-4.7878714
BALB	mutated MAGGIE motif	-1.3370293598285343	-3.180698399999999
BALB	mutated MAGGIE motif	-1.0095554503564559	-6.658212
BALB	mutated MAGGIE motif	-0.5669224448669752	6.438197400000001
BALB	mutated MAGGIE motif	-0.10078713276779805	-4.789187000000002
BALB	mutated MAGGIE motif	1.6348930025227477	-6.589430000000001
BALB	mutated MAGGIE motif	-1.9291468440361035	-3.2626264
BALB	mutated MAGGIE motif	-1.1621993195237712	-3.5367295999999993
BALB	mutated MAGGIE motif	-1.3531387401154262	-3.363454
BALB	mutated MAGGIE motif	-1.4966433266258772	-6.55775453
BALB	mutated MAGGIE motif	-0.4685595956528772	5.24869215
BALB	mutated MAGGIE motif	-0.09401878948376385	-6.077688800000001
BALB	mutated MAGGIE motif	-1.189229528403886	-2.0203275000000005
BALB	mutated MAGGIE motif	-0.7313430627364808	3.3211330999999995
BALB	mutated MAGGIE motif	1.9000463988808365	-2.4222445000000006
BALB	mutated MAGGIE motif	6.392960720926295	6.8539669000000005
BALB	mutated MAGGIE motif	0.2786717297564927	3.025498699999999
BALB	mutated MAGGIE motif	1.2739799123955162	4.832247999999999
BALB	mutated MAGGIE motif	-0.21769727822155982	4.534568999999999
BALB	mutated MAGGIE motif	-2.30138254294819	3.6913783
BALB	mutated MAGGIE motif	-1.2594100714555836	2.5484514000000007
BALB	mutated MAGGIE motif	-1.2335519164972544	-6.044394100000001
BALB	mutated MAGGIE motif	-1.4865694167411618	-5.348990000000001
BALB	mutated MAGGIE motif	0.0628288258424039	3.5347197899999996
BALB	mutated MAGGIE motif	-0.6783908888403456	2.6955790000000004
BALB	mutated MAGGIE motif	2.4169082949257636	6.1582558
BALB	mutated MAGGIE motif	-1.1038236552483482	3.9253607
BALB	mutated MAGGIE motif	-0.7099551390676195	-5.8593115000000004
BALB	mutated MAGGIE motif	-0.757328508870927	3.5516474700000003
BALB	mutated MAGGIE motif	0.4514158008963278	-4.196992400000001
BALB	mutated MAGGIE motif	-1.613452313484112	-4.983704
BALB	mutated MAGGIE motif	1.11749848950687	-6.4591
BALB	mutated MAGGIE motif	-1.4568869086193503	-5.3031415
BALB	mutated MAGGIE motif	-0.09656469605493978	4.3347885
BALB	mutated MAGGIE motif	2.806259527786564	3.9747462000000002
BALB	mutated MAGGIE motif	-0.529647264837922	6.538055699999999
BALB	mutated MAGGIE motif	-0.4331164011323887	-3.4954494999999994
BALB	mutated MAGGIE motif	-2.124450939641868	6.403317000000001
BALB	mutated MAGGIE motif	-0.7386123274604781	-6.6582114
BALB	mutated MAGGIE motif	-0.404854750693068	-3.46681565
BALB	mutated MAGGIE motif	-0.5806834116355919	-2.132179599999998
BALB	mutated MAGGIE motif	0.35283489023288883	3.989890000000001
BALB	mutated MAGGIE motif	1.4842073978064363	4.162468400000001
BALB	mutated MAGGIE motif	0.4079942222747235	-2.735699200000001
BALB	mutated MAGGIE motif	-1.8143618902735184	-5.0787059999999995
BALB	mutated MAGGIE motif	-2.489124264198514	5.600517700000001
BALB	mutated MAGGIE motif	3.2505929068730257	-5.070519400000001
BALB	mutated MAGGIE motif	-1.1275194351773132	-5.9302902999999985
BALB	mutated MAGGIE motif	-2.7543833277599843	-3.4379142000000007
BALB	mutated MAGGIE motif	-0.562288740275398	-3.233024
BALB	mutated MAGGIE motif	-0.8135361520114079	-2.6863180499999997
BALB	mutated MAGGIE motif	0.8825305681678994	5.2039875
BALB	mutated MAGGIE motif	-0.9893986686925915	4.430996000000001
BALB	mutated MAGGIE motif	-2.3387936251257115	-4.676914299999998
BALB	mutated MAGGIE motif	-0.22370039517117934	-2.6933277
BALB	mutated MAGGIE motif	-0.573062626100791	-2.3169905999999996
BALB	mutated MAGGIE motif	-0.7867684727920743	4.5027206
BALB	mutated MAGGIE motif	-1.405689323316719	5.7378727
BALB	mutated MAGGIE motif	-2.499789356253438	-6.724964
BALB	mutated MAGGIE motif	-0.7241206976991004	-6.486668900000001
BALB	mutated MAGGIE motif	-1.28447518587235	-3.2620397
BALB	mutated MAGGIE motif	-1.7522806593150904	6.398030400000001
BALB	mutated MAGGIE motif	-1.9400220312063299	3.659609
BALB	mutated MAGGIE motif	-5.25953784376958	-6.658211
BALB	mutated MAGGIE motif	2.1616930851281406	6.658212000000001
BALB	mutated MAGGIE motif	-0.46125817390893253	6.6582114
BALB	mutated MAGGIE motif	0.5420353916764613	6.557754480000001
BALB	mutated MAGGIE motif	-1.2882573463018856	-6.658211400000001
BALB	mutated MAGGIE motif	1.4130375955301129	-5.6648753
BALB	mutated MAGGIE motif	3.4802035618129015	4.0986898
BALB	mutated MAGGIE motif	1.8215844674126194	7.703714
BALB	mutated MAGGIE motif	0.7260838775099505	-6.0443940000000005
BALB	mutated MAGGIE motif	-0.29904557196908055	-4.9494566
BALB	mutated MAGGIE motif	-1.0872483665005737	5.508784100000001
BALB	mutated MAGGIE motif	0.4382839442489104	2.1723532
BALB	mutated MAGGIE motif	-2.262100061045969	4.7874087
BALB	mutated MAGGIE motif	0.5432156718345924	2.788496
BALB	mutated MAGGIE motif	-2.8838744942010326	-5.741555
BALB	mutated MAGGIE motif	-1.0513665495828306	2.605727999999999
BALB	mutated MAGGIE motif	2.7015167581619166	5.8174167
BALB	mutated MAGGIE motif	-0.24052654168568832	-2.558449200000001
BALB	mutated MAGGIE motif	0.1857100113730379	-3.271318
BALB	mutated MAGGIE motif	-2.3348446252029103	-6.398030400000001
BALB	mutated MAGGIE motif	-3.3889548520331303	-8.427052619999998
BALB	mutated MAGGIE motif	-1.2581277659746624	-5.163279999999999
BALB	mutated MAGGIE motif	1.4928760999876793	6.6384485
BALB	mutated MAGGIE motif	1.9215398923590215	-2.7218001
BALB	mutated MAGGIE motif	2.416877942640314	-5.772791999999999
BALB	mutated MAGGIE motif	0.9722015476564279	-6.8857023
BALB	mutated MAGGIE motif	0.23017212366457418	-2.061840299999999
BALB	mutated MAGGIE motif	-2.9976970779878114	-3.3915823975
BALB	mutated MAGGIE motif	-0.031266240200425344	-4.062269199999999
BALB	mutated MAGGIE motif	0.32099014482921895	-5.654173400000001
BALB	mutated MAGGIE motif	-2.5298767794604884	-3.5730300000000006
BALB	mutated MAGGIE motif	-3.9832936672676	-5.5896604
BALB	mutated MAGGIE motif	-3.3256368245413217	-4.015895
BALB	mutated MAGGIE motif	-0.24480148037852079	-6.0024764
BALB	mutated MAGGIE motif	-1.5710300405250774	5.212556599999999
BALB	mutated MAGGIE motif	-2.4601417012193414	-4.567303
BALB	mutated MAGGIE motif	-1.4685695424186913	-3.8102410000000004
BALB	mutated MAGGIE motif	0.12195012980614361	-2.073614400000002
BALB	mutated MAGGIE motif	-1.097367159363535	-4.0514701
BALB	mutated MAGGIE motif	-2.067077573811085	-2.096528
BALB	mutated MAGGIE motif	1.1966712876707746	3.3735660000000003
BALB	mutated MAGGIE motif	1.864875852887623	-5.0429425
BALB	mutated MAGGIE motif	-2.909833449790871	6.6384485
BALB	mutated MAGGIE motif	-1.3788911966058572	6.06866152
BALB	mutated MAGGIE motif	-0.4131312049083302	3.7773529999999997
BALB	mutated MAGGIE motif	-0.7971451495385367	3.6022776400000005
BALB	mutated MAGGIE motif	-3.292553492753849	-4.511947299999999
BALB	mutated MAGGIE motif	-2.0911668100137577	-3.6447567000000007
BALB	mutated MAGGIE motif	-1.4490360985799642	3.24950197
BALB	mutated MAGGIE motif	2.599906359616374	3.0041597000000015
BALB	mutated MAGGIE motif	4.699646810706519	-6.007631999999999
BALB	mutated MAGGIE motif	5.058099988493412	6.658211999999999
BALB	mutated MAGGIE motif	4.256132436265308	-3.2817639
BALB	mutated MAGGIE motif	-1.64918171371903	-4.657859
BALB	mutated MAGGIE motif	3.605662603664708	4.994738600000001
BALB	mutated MAGGIE motif	-0.5649747185446445	-3.88587651
BALB	mutated MAGGIE motif	-4.681004539428367	-6.5577542
BALB	mutated MAGGIE motif	-1.274139309206391	-4.242896399999999
BALB	mutated MAGGIE motif	-0.9086720910356538	2.6022885000000002
BALB	mutated MAGGIE motif	0.6597716723809759	6.364803200000001
BALB	mutated MAGGIE motif	-0.34257447942806785	-4.430359799999999
BALB	mutated MAGGIE motif	-0.41947764302447066	4.755120400000001
BALB	mutated MAGGIE motif	3.175782819980952	6.658212000000001
BALB	mutated MAGGIE motif	-1.2045711442492042	3.1963954
BALB	mutated MAGGIE motif	-0.6586915616864157	4.306351999999999
BALB	mutated MAGGIE motif	-2.1298434325986006	-6.688438
BALB	mutated MAGGIE motif	-1.5669132755071233	-2.8197915999999985
BALB	mutated MAGGIE motif	-3.4230283776772605	3.2194227999999994
BALB	mutated MAGGIE motif	0.15646768173534387	2.162127999999999
BALB	mutated MAGGIE motif	1.5768039773339915	-6.638448499999998
BALB	mutated MAGGIE motif	-0.42544810182751647	-3.429291
BALB	mutated MAGGIE motif	0.7976676008153505	-4.8354723
BALB	mutated MAGGIE motif	-0.7179716671751546	6.274853499999998
BALB	mutated MAGGIE motif	-2.088236473429512	-4.434980400000001
BALB	mutated MAGGIE motif	-0.214942768426452	3.5480156000000003
BALB	mutated MAGGIE motif	0.9958815414769191	4.434980599999999
BALB	mutated MAGGIE motif	-0.6805343497930774	-3.8638713
BALB	mutated MAGGIE motif	0.6504181419496895	-3.0726940000000003
BALB	mutated MAGGIE motif	2.1917660499818945	5.7415447
BALB	mutated MAGGIE motif	-0.6898370674879915	-2.2758127000000004
BALB	mutated MAGGIE motif	-1.9078692588508819	-5.648285699999999
BALB	mutated MAGGIE motif	-0.12915980387066917	-3.6022137
BALB	mutated MAGGIE motif	1.281100249631475	6.4194749
BALB	mutated MAGGIE motif	0.3969980313857464	-5.102094600000001
BALB	mutated MAGGIE motif	-0.45797746334565836	3.2772564500000003
BALB	mutated MAGGIE motif	-0.5265279921144321	-2.3071289999999998
BALB	mutated MAGGIE motif	-0.2251282910552499	4.371864700000001
BALB	mutated MAGGIE motif	-0.06012971446786697	-3.4954020000000003
BALB	mutated MAGGIE motif	0.3762462667710045	5.32094956
BALB	mutated MAGGIE motif	0.01157157215403437	-6.1483656
BALB	mutated MAGGIE motif	2.368660432530549	6.3794937
BALB	mutated MAGGIE motif	-0.3895517777444413	-4.363149
BALB	mutated MAGGIE motif	-3.0910776917005576	-6.71440104
BALB	mutated MAGGIE motif	-0.5863756212827802	-3.7286417000000007
BALB	mutated MAGGIE motif	-3.5070685083913578	-3.9047178
BALB	mutated MAGGIE motif	-5.404846480871694	-6.07398953
BALB	mutated MAGGIE motif	-1.0091238980435486	3.2278330000000004
BALB	mutated MAGGIE motif	-1.6377384195025764	2.7799924000000003
BALB	mutated MAGGIE motif	-0.05932005558999709	-3.9341125000000003
BALB	mutated MAGGIE motif	0.07005044426447515	-6.611762000000001
BALB	mutated MAGGIE motif	-0.6048229230819993	-3.6428632000000007
BALB	mutated MAGGIE motif	0.46148563647700147	5.622728
BALB	mutated MAGGIE motif	0.6127644659597316	6.658211700000001
BALB	mutated MAGGIE motif	-1.5555444546835417	-4.522102299999999
BALB	mutated MAGGIE motif	2.3028673609728743	4.9593908
BALB	mutated MAGGIE motif	-0.7192267085395372	-4.9579
BALB	mutated MAGGIE motif	-0.6363709160875723	-4.810726599999999
BALB	mutated MAGGIE motif	-1.731469040484252	-3.8427046999999996
BALB	mutated MAGGIE motif	-0.5692378386883403	5.523687300000001
BALB	mutated MAGGIE motif	-0.8174724975935019	-4.179852700000001
BALB	mutated MAGGIE motif	-0.9181748502411535	4.9999553
BALB	mutated MAGGIE motif	-0.4371586766898261	-6.100443100000001
BALB	mutated MAGGIE motif	-2.2053383612695003	-4.429559499999999
BALB	mutated MAGGIE motif	-1.8930741334247916	-5.64324723
BALB	mutated MAGGIE motif	-4.077497561157545	-2.3532925000000002
BALB	mutated MAGGIE motif	-1.7244854385902535	-4.610434950000001
BALB	mutated MAGGIE motif	2.432728825097825	3.5995918000000002
BALB	mutated MAGGIE motif	-2.1857933003994616	-2.605029
BALB	mutated MAGGIE motif	-0.2607763205629068	-2.880418500000001
BALB	mutated MAGGIE motif	-1.538051439144592	-6.183650500000001
BALB	mutated MAGGIE motif	0.08783183953358087	-2.6669079999999994
BALB	mutated MAGGIE motif	-0.6252089553898732	2.1417525
BALB	mutated MAGGIE motif	-0.9725722672297161	6.63844892
BALB	mutated MAGGIE motif	-0.7622576228608162	2.732358800000001
BALB	mutated MAGGIE motif	-0.0009302308923029301	-2.948816700000001
BALB	mutated MAGGIE motif	0.48075267509947217	-4.2194305
BALB	mutated MAGGIE motif	-1.144105550402375	-4.19671335
BALB	mutated MAGGIE motif	-1.2488676131307521	-4.7492908
BALB	mutated MAGGIE motif	-1.600533581336495	2.1286120000000004
BALB	mutated MAGGIE motif	-3.3284195919232453	-4.9751916
BALB	mutated MAGGIE motif	-2.142215148187132	-6.6582116000000005
BALB	mutated MAGGIE motif	-0.12427636457794922	2.8814966
BALB	mutated MAGGIE motif	3.389992369832516	5.8952186
BALB	mutated MAGGIE motif	0.31253247446711274	-3.7940774000000013
BALB	mutated MAGGIE motif	0.5630923076910737	-2.9670569999999996
BALB	mutated MAGGIE motif	-0.015793022953601188	2.3681405999999994
BALB	mutated MAGGIE motif	1.042052381560393	5.0842929
BALB	mutated MAGGIE motif	0.15841621559571983	5.853796
BALB	mutated MAGGIE motif	1.8621165792471537	3.3735657000000003
BALB	mutated MAGGIE motif	0.23630365498443062	3.2426974
BALB	mutated MAGGIE motif	1.2637571177996731	2.0767760000000006
BALB	mutated MAGGIE motif	-0.7248866727077594	-4.9660096000000005
BALB	mutated MAGGIE motif	-1.1590591530203715	6.05525086
BALB	mutated MAGGIE motif	2.528883827274642	4.0262587
BALB	mutated MAGGIE motif	-6.189313986550502	-6.426442999999999
BALB	mutated MAGGIE motif	3.0092629213289674	6.658211999999999
BALB	mutated MAGGIE motif	-0.9360513642270467	-5.861530599999998
BALB	mutated MAGGIE motif	-0.7632775607649487	4.5461879000000005
BALB	mutated MAGGIE motif	1.5986666649468875	5.0903152999999985
BALB	mutated MAGGIE motif	5.703349915166396	-3.7441807000000003
BALB	mutated MAGGIE motif	-3.4762742464397407	5.472406999999999
BALB	mutated MAGGIE motif	-0.5623068217415765	2.5890109999999997
BALB	mutated MAGGIE motif	0.8397937919904255	5.384015499999999
BALB	mutated MAGGIE motif	0.6102547864085857	-4.423942000000001
BALB	mutated MAGGIE motif	2.203004009335899	5.287428900000001
BALB	mutated MAGGIE motif	-2.4448452988105585	-6.853966700000001
BALB	mutated MAGGIE motif	-3.206696539846393	-5.363309000000001
BALB	mutated MAGGIE motif	-2.078348061789455	-2.8371032699999996
BALB	mutated MAGGIE motif	0.024828136843933812	6.5577544
BALB	mutated MAGGIE motif	-1.8134529323461024	-2.2468015
BALB	mutated MAGGIE motif	-1.3871993990329896	-2.0758446
BALB	mutated MAGGIE motif	1.5656126058302244	2.0722975999999997
BALB	mutated MAGGIE motif	-2.396507216483978	-6.8337117
BALB	mutated MAGGIE motif	-0.24543275684407995	-4.3356725
BALB	mutated MAGGIE motif	-0.9973303898681296	-3.8435813999999997
BALB	mutated MAGGIE motif	0.8504492477090682	6.5201712
BALB	mutated MAGGIE motif	0.3399336918492697	5.2874289999999995
BALB	mutated MAGGIE motif	-1.0445264945902917	2.9600622
BALB	mutated MAGGIE motif	2.748400663863525	-2.3984707999999992
BALB	mutated MAGGIE motif	-0.6527389389786933	-3.6960271500000004
BALB	mutated MAGGIE motif	-2.382674695090989	-6.043804
BALB	mutated MAGGIE motif	-0.8099425951985593	4.096094000000001
BALB	mutated MAGGIE motif	0.8653966511217703	-3.18225
BALB	mutated MAGGIE motif	-0.15149415556634782	4.1114180000000005
BALB	mutated MAGGIE motif	-0.5559426119618216	-4.1429584
BALB	mutated MAGGIE motif	-0.6217732291653926	2.2009550000000004
BALB	mutated MAGGIE motif	-6.442611803689344	-6.1553595
BALB	mutated MAGGIE motif	-1.068781370925107	-4.25197204
BALB	mutated MAGGIE motif	-0.2962633616093795	3.4599664999999993
BALB	mutated MAGGIE motif	-0.05429966674120923	2.7127184
BALB	mutated MAGGIE motif	0.12501633357893116	-6.0443937000000005
BALB	mutated MAGGIE motif	0.04724484985795918	-4.417173200000001
BALB	mutated MAGGIE motif	-0.2944548480048903	6.658211199999998
BALB	mutated MAGGIE motif	-0.8686017521561702	2.30028999
BALB	mutated MAGGIE motif	-2.7499583787128934	4.412454650000001
BALB	mutated MAGGIE motif	-3.096716429928164	-3.3735662
BALB	mutated MAGGIE motif	-0.5995201643489203	-3.9024422000000003
BALB	mutated MAGGIE motif	-3.9185148799536687	-8.6015389
BALB	mutated MAGGIE motif	-0.36052873079162406	-3.1420132
BALB	mutated MAGGIE motif	-0.7623122060865972	-4.3138893
BALB	mutated MAGGIE motif	-0.49849094360117974	-2.8371034999999996
BALB	mutated MAGGIE motif	-1.4589996524558506	-6.658211999999999
BALB	mutated MAGGIE motif	1.3559755757150391	3.9014680000000004
BALB	mutated MAGGIE motif	-0.04030758221482866	-2.9728923000000007
BALB	mutated MAGGIE motif	-0.8850781280828688	-5.197539
BALB	mutated MAGGIE motif	-0.6049823702584014	-5.2093549
BALB	mutated MAGGIE motif	-2.5327061262068407	-5.074528899999999
BALB	mutated MAGGIE motif	-4.24764729686683	3.2742540999999994
BALB	mutated MAGGIE motif	3.3345818956977675	3.99427224
BALB	mutated MAGGIE motif	-1.4939527444206395	-4.5740916
BALB	mutated MAGGIE motif	-1.0770837710985104	3.3447807
BALB	mutated MAGGIE motif	-1.1532615093049303	-5.915853
BALB	mutated MAGGIE motif	-2.6204113367254465	-6.6384487000000005
BALB	mutated MAGGIE motif	0.21098386070885145	6.4900704000000005
BALB	mutated MAGGIE motif	-4.424598137586939	-6.648149
BALB	mutated MAGGIE motif	-6.029103489300522	-6.5577545
BALB	mutated MAGGIE motif	-0.4499871579149497	-7.419883799999999
BALB	mutated MAGGIE motif	-0.7214966249662442	-5.479445000000002
BALB	mutated MAGGIE motif	0.3816111452523683	5.5010047
BALB	mutated MAGGIE motif	-0.08379870923993415	-4.1893329999999995
BALB	mutated MAGGIE motif	2.3142103411372505	5.084196599999999
BALB	mutated MAGGIE motif	-1.7654907858827222	-9.7338531
BALB	mutated MAGGIE motif	-0.4162298092978558	3.9828447000000002
BALB	mutated MAGGIE motif	-0.684379867244993	-2.6777290999999996
BALB	mutated MAGGIE motif	-1.4235917977530113	-6.3263359999999995
BALB	mutated MAGGIE motif	1.7524079340236351	-4.024714999999999
BALB	mutated MAGGIE motif	-0.453762868550605	2.5226412
BALB	mutated MAGGIE motif	-0.44784846361681474	-2.4822017
BALB	mutated MAGGIE motif	3.7872089387445045	6.714401299999999
BALB	mutated MAGGIE motif	0.22294118324526657	6.0997412
BALB	mutated MAGGIE motif	-0.6249691715133077	6.039497499999999
BALB	mutated MAGGIE motif	-1.2464052233126335	2.5849624500000004
BALB	mutated MAGGIE motif	0.16616914537463767	5.0286282
BALB	mutated MAGGIE motif	-1.4232171937246578	-3.945078799999999
BALB	mutated MAGGIE motif	-1.0964081850304668	5.861529999999999
BALB	mutated MAGGIE motif	1.0945273685847843	5.1554325
BALB	mutated MAGGIE motif	-0.5243987346719123	3.5544589999999996
BALB	mutated MAGGIE motif	-4.5579051362224	-6.6582114
BALB	mutated MAGGIE motif	-0.43667464881186824	-3.519727200000001
BALB	mutated MAGGIE motif	-0.5088036103688749	-2.9400696
BALB	mutated MAGGIE motif	0.21247695247136544	2.863648999999999
BALB	mutated MAGGIE motif	2.034785864374081	6.658212000000001
BALB	mutated MAGGIE motif	-0.23012186578358929	4.3422947
BALB	mutated MAGGIE motif	-0.5871984498055332	-3.934112399999999
BALB	mutated MAGGIE motif	-2.095380006769098	-4.759621000000001
BALB	mutated MAGGIE motif	0.740426825168778	3.3735669999999995
BALB	mutated MAGGIE motif	0.5265652225576565	5.316067200000001
BALB	mutated MAGGIE motif	-0.7420374023063481	-4.931908099999999
BALB	mutated MAGGIE motif	-0.9116851135625899	4.4295215
BALB	mutated MAGGIE motif	-4.295661753593002	-6.557754500000001
BALB	mutated MAGGIE motif	0.9266810057645856	3.6276639000000004
BALB	mutated MAGGIE motif	-1.4692300309062736	-3.3571850999999997
BALB	mutated MAGGIE motif	-2.7008385281065586	-3.0959694000000004
BALB	mutated MAGGIE motif	0.3490868500210862	-6.271826599999999
BALB	mutated MAGGIE motif	2.3801934128837248	2.9752660000000004
BALB	mutated MAGGIE motif	-1.1558366520538357	2.4128415999999993
BALB	mutated MAGGIE motif	-1.2318090514096731	-3.5253048999999996
BALB	mutated MAGGIE motif	0.3316273621848769	-2.9613991
BALB	mutated MAGGIE motif	-0.785958076003022	5.9862719
BALB	mutated MAGGIE motif	-0.20428492265123221	3.4768383000000007
BALB	mutated MAGGIE motif	-1.4787116739938608	-5.3732681
BALB	mutated MAGGIE motif	-0.3840821477738565	-4.186986900000001
BALB	mutated MAGGIE motif	-3.3830493622593627	-4.348095
BALB	mutated MAGGIE motif	-1.0322033667174528	5.084196599999999
BALB	mutated MAGGIE motif	0.6904464594400359	-4.4349815
BALB	mutated MAGGIE motif	0.43135552157351675	-6.127065
BALB	mutated MAGGIE motif	-0.05470643349793214	-6.658211
BALB	mutated MAGGIE motif	3.1364406556738276	6.568710300000001
BALB	mutated MAGGIE motif	-0.32004967696580255	6.5878250000000005
BALB	mutated MAGGIE motif	-2.1795247186928757	-3.373566499999999
BALB	mutated MAGGIE motif	-1.5979183335889173	-6.587824099999999
BALB	mutated MAGGIE motif	-0.6010397063553707	-2.7127184
BALB	mutated MAGGIE motif	-0.6992835747298312	3.2265593
BALB	mutated MAGGIE motif	-3.692936625605988	-6.546208999999999
BALB	mutated MAGGIE motif	-3.6861238872280073	-4.91803
BALB	mutated MAGGIE motif	-4.41416181182198	-2.7789306
BALB	mutated MAGGIE motif	-0.28147785251480606	3.004159999999999
BALB	mutated MAGGIE motif	-1.257322871781879	-4.800011100000001
BALB	mutated MAGGIE motif	-1.361852142051709	2.2168399999999995
BALB	mutated MAGGIE motif	-5.659325415734506	-6.6582113000000005
BALB	mutated MAGGIE motif	0.9005759081066604	4.852935800000001
BALB	mutated MAGGIE motif	0.9198825264480872	-2.990126
BALB	mutated MAGGIE motif	-1.5066302547616424	-2.6809829999999994
BALB	mutated MAGGIE motif	0.062043622731426495	9.8960687
BALB	mutated MAGGIE motif	0.5519685954356035	-4.546209559999999
BALB	mutated MAGGIE motif	-0.28621911658534405	-5.175444000000001
BALB	mutated MAGGIE motif	4.993216467741336	11.901682000000001
BALB	mutated MAGGIE motif	0.06470568938781529	5.129523900000001
BALB	mutated MAGGIE motif	1.649882052474776	5.979672000000001
BALB	mutated MAGGIE motif	0.24551873099844634	5.8786793
BALB	mutated MAGGIE motif	-2.4908035810122335	-2.1153085999999997
BALB	mutated MAGGIE motif	-1.0541681851860858	5.61988285
BALB	mutated MAGGIE motif	-0.25986115544646005	-4.5306805
BALB	mutated MAGGIE motif	-0.10558296090651353	-5.054759000000001
BALB	mutated MAGGIE motif	-7.122362116711442	-5.6254714
BALB	mutated MAGGIE motif	-1.3459559230805214	-6.6730775
BALB	mutated MAGGIE motif	-1.6589136163563225	2.247333000000001
BALB	mutated MAGGIE motif	-0.7720152802863192	6.839040700000001
BALB	mutated MAGGIE motif	0.6500917549593854	2.589563400000001
BALB	mutated MAGGIE motif	1.327782218135379	6.4376547
BALB	mutated MAGGIE motif	-0.28160946471033643	2.1539728000000005
BALB	mutated MAGGIE motif	-0.2679855650209282	-4.5548237
BALB	mutated MAGGIE motif	0.7861870949923064	-5.0742970000000005
BALB	mutated MAGGIE motif	-0.2774962229731788	3.5447138000000002
BALB	mutated MAGGIE motif	0.25410434826530537	2.09711646
BALB	mutated MAGGIE motif	1.0	-5.8763549
BALB	mutated MAGGIE motif	-4.620785760326575	-5.0783999999999985
BALB	mutated MAGGIE motif	-0.5412561759826024	3.850641500000001
BALB	mutated MAGGIE motif	-3.4761507969406367	-8.25193971
BALB	mutated MAGGIE motif	-1.0034540986424414	4.550337799999999
BALB	mutated MAGGIE motif	-3.9843081917125076	6.638448400000001
BALB	mutated MAGGIE motif	-0.49021884333734267	-4.077264999999999
BALB	mutated MAGGIE motif	-1.8828936384441506	-5.377833000000001
BALB	mutated MAGGIE motif	-0.28225409114440136	-8.7697004
BALB	mutated MAGGIE motif	-0.8007960840407149	-3.040845899999999
BALB	mutated MAGGIE motif	0.05681491392448823	-6.6384486
BALB	mutated MAGGIE motif	-2.7862516730728033	-6.853967000000001
BALB	mutated MAGGIE motif	1.4856827224689093	-4.074078100000001
BALB	mutated MAGGIE motif	-1.189334132757153	9.908984
BALB	mutated MAGGIE motif	-0.9213837781504095	6.09487556
BALB	mutated MAGGIE motif	-1.4859671961287617	-2.2927591000000005
BALB	mutated MAGGIE motif	-1.5683014489462868	-5.3315569
BALB	mutated MAGGIE motif	1.8227796409046406	-2.165039
BALB	mutated MAGGIE motif	-0.2916644646477424	-2.8020298500000007
BALB	mutated MAGGIE motif	-1.441145760397271	-4.8884988400000005
BALB	mutated MAGGIE motif	-0.12241544008476435	-2.9328850000000006
BALB	mutated MAGGIE motif	2.6306707102158544	3.3735663000000002
BALB	mutated MAGGIE motif	3.4331451113353944	6.5388405999999994
BALB	mutated MAGGIE motif	0.002806497236062633	-3.1954320000000003
BALB	mutated MAGGIE motif	-2.5207750890242737	-2.7646409999999992
BALB	mutated MAGGIE motif	-0.7534249313160855	-4.431505000000001
BALB	mutated MAGGIE motif	1.5568217052489972	6.584962599999999
BALB	mutated MAGGIE motif	-1.771255882538517	-3.671552000000001
BALB	mutated MAGGIE motif	-4.100939861550177	-4.84952292
BALB	mutated MAGGIE motif	0.0018488191862386927	-4.822779000000001
BALB	mutated MAGGIE motif	-1.2412712365049705	3.3735661
BALB	mutated MAGGIE motif	3.734188509495633	4.406492999999999
BALB	mutated MAGGIE motif	-1.21326517704657	3.480026500000001
BALB	mutated MAGGIE motif	-1.478475841302341	-2.950050700000001
BALB	mutated MAGGIE motif	-0.38801491049352776	5.069416
BALB	mutated MAGGIE motif	-0.9156901888789415	3.3460433999999997
BALB	mutated MAGGIE motif	-1.2533097036575356	5.3132757999999995
BALB	mutated MAGGIE motif	-0.604476656767968	-3.906388999999999
BALB	mutated MAGGIE motif	0.03484539238619622	-5.3977553
BALB	mutated MAGGIE motif	4.241713090665774	6.7134888
BALB	mutated MAGGIE motif	-0.27080238554906355	9.3594412
BALB	mutated MAGGIE motif	0.39729724463002736	-6.269568700000001
BALB	mutated MAGGIE motif	-1.2353323119675919	5.2551814
BALB	mutated MAGGIE motif	-2.917968122563726	-9.4012531
BALB	mutated MAGGIE motif	1.8232984234251939	2.7879463
BALB	mutated MAGGIE motif	0.46727663547158116	-3.6921799999999996
BALB	mutated MAGGIE motif	0.179681473175334	-4.041312999999999
BALB	mutated MAGGIE motif	-0.36050829717109956	-3.1721509999999995
BALB	mutated MAGGIE motif	0.2593726005106687	3.0794213000000004
BALB	mutated MAGGIE motif	-0.6361787757611532	5.939850999999999
BALB	mutated MAGGIE motif	-3.5376439619298847	-3.5741587
BALB	mutated MAGGIE motif	-0.9141709887096283	-4.381531800000001
BALB	mutated MAGGIE motif	-3.3594870305162834	4.1806178
BALB	mutated MAGGIE motif	0.2413245250271805	4.9287275500000005
BALB	mutated MAGGIE motif	-0.7056309865349748	-4.0933098999999995
BALB	mutated MAGGIE motif	0.06503769625899913	6.274852700000001
BALB	mutated MAGGIE motif	-3.3783869251214176	-3.8989771
BALB	mutated MAGGIE motif	-0.8265613554816369	-4.0000002
BALB	mutated MAGGIE motif	-0.6995762941875645	-6.379493499999999
BALB	mutated MAGGIE motif	-1.7045184400326105	2.1068525499999997
BALB	mutated MAGGIE motif	-2.2736366068568055	2.36866197
BALB	mutated MAGGIE motif	1.8339813915684111	6.7249631
BALB	mutated MAGGIE motif	2.059632785780301	-6.587824599999999
BALB	mutated MAGGIE motif	3.3113397122160437	6.281822000000001
BALB	mutated MAGGIE motif	-0.9886583687592712	-2.7356991699999997
BALB	mutated MAGGIE motif	-2.999015753064868	-3.0715821
BALB	mutated MAGGIE motif	-3.2726911671126944	-4.742756099999999
BALB	mutated MAGGIE motif	-0.07819299445324468	7.1679402
BALB	mutated MAGGIE motif	-0.8403143208283197	-8.682572400000002
BALB	mutated MAGGIE motif	-1.5496597659654836	-5.4543947500000005
BALB	mutated MAGGIE motif	0.3934317620305139	-5.804855659999999
BALB	mutated MAGGIE motif	0.30882404427042864	3.77132656
BALB	mutated MAGGIE motif	-1.1056562466089082	-3.3676554000000003
BALB	mutated MAGGIE motif	2.5919463294890943	2.048973
BALB	mutated MAGGIE motif	0.010442324207021514	6.658211499999999
BALB	mutated MAGGIE motif	-0.521125761994762	3.2167064000000005
BALB	mutated MAGGIE motif	-0.9292669428426592	2.837103599999998
BALB	mutated MAGGIE motif	-3.3067221873368213	4.0622692
BALB	mutated MAGGIE motif	3.1816602571265533	6.560602
BALB	mutated MAGGIE motif	-0.39139519695991876	-5.0582289
BALB	mutated MAGGIE motif	-1.3857325796297308	-6.724963499999999
BALB	mutated MAGGIE motif	-0.19892132460293066	4.0
BALB	mutated MAGGIE motif	-0.7949008308152257	3.5737830999999995
BALB	altered spacing	0.5671246756613746	na
BALB	altered spacing	1.0983484188569914	na
BALB	altered spacing	-0.5474877953024935	na
BALB	altered spacing	0.9776159695350612	na
BALB	altered spacing	0.16944257540842855	na
BALB	altered spacing	1.1513177973790834	na
BALB	altered spacing	0.26687209203604123	na
BALB	altered spacing	2.1997979330880986	na
BALB	altered spacing	0.6448674975548894	na
BALB	altered spacing	-3.213727272677565	na
BALB	altered spacing	0.13378542715850017	na
BALB	altered spacing	-1.3147779809277922	na
BALB	altered spacing	2.72558536631527	na
BALB	altered spacing	-0.327202560752478	na
BALB	altered spacing	-0.6566313808391264	na
BALB	altered spacing	-0.4093330070469321	na
BALB	altered spacing	-1.4262647547020983	na
BALB	altered spacing	-0.213595473099289	na
BALB	altered spacing	-0.838456139345344	na
BALB	altered spacing	-0.4412052136460147	na
BALB	altered spacing	-1.0443785999169606	na
BALB	altered spacing	-0.07883147695625592	na
BALB	altered spacing	0.14060530081971123	na
BALB	altered spacing	-0.023492190535579383	na
BALB	altered spacing	-1.9477967494892328	na
BALB	altered spacing	2.274906427117566	na
BALB	altered spacing	-1.5540581519325016	na
BALB	altered spacing	-1.6559163452310024	na
BALB	altered spacing	-1.133560488491585	na
BALB	altered spacing	-1.6169536698305622	na
BALB	altered spacing	0.7205311360805613	na
BALB	altered spacing	0.2510011334669864	na
BALB	altered spacing	0.6675305071682223	na
BALB	altered spacing	-1.4444702389826132	na
BALB	altered spacing	0.28290015116310485	na
BALB	altered spacing	1.0261364945474751	na
BALB	altered spacing	-0.1183385820682119	na
BALB	altered spacing	0.4956951626240688	na
BALB	altered spacing	-0.529698481858965	na
BALB	altered spacing	0.4985759347236973	na
BALB	altered spacing	3.3303587692272485	na
BALB	altered spacing	-3.9747612513502726	na
BALB	altered spacing	0.18112830463536467	na
BALB	altered spacing	-0.10040189695783752	na
BALB	altered spacing	-0.033201560368405936	na
BALB	altered spacing	0.7743558400794801	na
BALB	altered spacing	0.5169558241407528	na
BALB	altered spacing	-0.24123050899600873	na
BALB	altered spacing	-0.2700760041140411	na
BALB	altered spacing	-0.3789861419645826	na
BALB	altered spacing	-2.454045248502076	na
BALB	altered spacing	-0.697689742645677	na
BALB	altered spacing	-0.08297257768920918	na
BALB	altered spacing	-0.3532002815424402	na
BALB	no motif/spacing effect	-0.7905580215306038	na
BALB	no motif/spacing effect	0.4382928515791469	na
BALB	no motif/spacing effect	0.0	na
BALB	no motif/spacing effect	0.16081603313352844	na
BALB	no motif/spacing effect	0.5571461819417451	na
BALB	no motif/spacing effect	-0.9226133127091996	na
BALB	no motif/spacing effect	-0.4850645685265582	na
BALB	no motif/spacing effect	0.0033267898357571823	na
BALB	no motif/spacing effect	-0.5191522887190025	na
BALB	no motif/spacing effect	0.05937854707893164	na
BALB	no motif/spacing effect	-0.28014316633830916	na
BALB	no motif/spacing effect	-1.105412003363507	na
BALB	no motif/spacing effect	-0.03143978235110012	na
BALB	no motif/spacing effect	-0.37901008404053194	na
BALB	no motif/spacing effect	-0.028510164703596352	na
BALB	no motif/spacing effect	-0.46032990082320424	na
BALB	no motif/spacing effect	-0.40523514106535785	na
BALB	no motif/spacing effect	0.15772566921537123	na
BALB	no motif/spacing effect	-0.416619525800062	na
BALB	no motif/spacing effect	-1.9423306499259123	na
BALB	no motif/spacing effect	-0.6785961036044101	na
BALB	no motif/spacing effect	-0.5345939702390368	na
BALB	no motif/spacing effect	0.6367704028708285	na
BALB	no motif/spacing effect	0.2331597162237209	na
BALB	no motif/spacing effect	0.42930037823769673	na
BALB	no motif/spacing effect	-0.8925806086283794	na
BALB	no motif/spacing effect	-0.0945214451282892	na
BALB	no motif/spacing effect	-0.36502140672647254	na
BALB	no motif/spacing effect	-1.2554285774141984	na
BALB	no motif/spacing effect	-1.1910195058933537	na
BALB	no motif/spacing effect	0.4889086686488735	na
BALB	no motif/spacing effect	-0.3919921605625687	na
BALB	no motif/spacing effect	1.5657262818582391	na
BALB	no motif/spacing effect	-1.461505946875156	na
BALB	no motif/spacing effect	-0.5346370517491477	na
BALB	no motif/spacing effect	-0.15953705899920756	na
BALB	no motif/spacing effect	0.10218282115761479	na
BALB	no motif/spacing effect	-1.6796699974060076	na
BALB	no motif/spacing effect	-3.30104255368445	na
BALB	no motif/spacing effect	-1.4444238530448672	na
BALB	no motif/spacing effect	-2.2617881543999503	na
BALB	no motif/spacing effect	0.4038821744116827	na
BALB	no motif/spacing effect	1.8253343953249015	na
BALB	no motif/spacing effect	-1.2067232382462016	na
BALB	no motif/spacing effect	-0.955852352855092	na
BALB	no motif/spacing effect	-0.7533297128691174	na
BALB	no motif/spacing effect	-0.6098641821143334	na
BALB	no motif/spacing effect	-0.5238093936947656	na
BALB	no motif/spacing effect	-0.5711887009974088	na
BALB	no motif/spacing effect	0.27202978274632184	na
BALB	no motif/spacing effect	-1.2574333945307705	na
BALB	no motif/spacing effect	-0.9309840967912528	na
BALB	no motif/spacing effect	-0.6029843880735974	na
BALB	no motif/spacing effect	-1.0841468923563653	na
BALB	no motif/spacing effect	0.7955708335827363	na
BALB	no motif/spacing effect	0.8388717880987135	na
BALB	no motif/spacing effect	-0.3149068338716603	na
BALB	no motif/spacing effect	-0.6882884427377061	na
BALB	no motif/spacing effect	0.37027522086352516	na
BALB	no motif/spacing effect	0.4860223669272594	na
BALB	no motif/spacing effect	0.5692325577678687	na
BALB	no motif/spacing effect	0.041381845370447756	na
BALB	no motif/spacing effect	0.8196681834964555	na
BALB	no motif/spacing effect	0.03723587234840764	na
BALB	no motif/spacing effect	0.3948022307998622	na
BALB	no motif/spacing effect	-0.8717281335631313	na
BALB	no motif/spacing effect	-0.2969770531575877	na
BALB	no motif/spacing effect	-0.9823536760559808	na
BALB	no motif/spacing effect	-0.40872263920630925	na
BALB	no motif/spacing effect	-0.5657963537154305	na
BALB	no motif/spacing effect	0.0253428481144633	na
BALB	no motif/spacing effect	-0.6879792951989483	na
BALB	no motif/spacing effect	-1.1747280024196405	na
BALB	no motif/spacing effect	-1.8235639017922889	na
BALB	no motif/spacing effect	0.06584578951349762	na
BALB	no motif/spacing effect	0.26343244557721857	na
BALB	no motif/spacing effect	-0.6603806445761888	na
BALB	no motif/spacing effect	-0.8406789639695171	na
BALB	no motif/spacing effect	-0.6252623231994607	na
BALB	no motif/spacing effect	-0.6741920009577935	na
BALB	no motif/spacing effect	-2.085490521882508	na
BALB	no motif/spacing effect	-1.2091635939023755	na
BALB	no motif/spacing effect	-0.6682202355670661	na
BALB	no motif/spacing effect	0.16872027434089443	na
BALB	no motif/spacing effect	-0.5465457039844592	na
BALB	no motif/spacing effect	-1.2928426429911886	na
BALB	no motif/spacing effect	-0.8417301727650619	na
BALB	no motif/spacing effect	-0.9212872631725766	na
BALB	no motif/spacing effect	-0.47571897054010126	na
BALB	no motif/spacing effect	-0.25336584993196887	na
BALB	no motif/spacing effect	-0.4865054777183504	na
BALB	no motif/spacing effect	-0.7080350727797189	na
BALB	no motif/spacing effect	-0.7703550361156379	na
BALB	no motif/spacing effect	-0.3991523757004334	na
BALB	no motif/spacing effect	-1.4835064535188325	na
BALB	no motif/spacing effect	-1.4761614135407832	na
BALB	no motif/spacing effect	-0.4991193897703772	na
BALB	no motif/spacing effect	-0.6372335848219413	na
BALB	no motif/spacing effect	-1.246815390430935	na
BALB	no motif/spacing effect	-1.7579913317237965	na
BALB	no motif/spacing effect	-0.29766449309611165	na
BALB	no motif/spacing effect	0.32849636970254537	na
BALB	no motif/spacing effect	0.4958916255188974	na
BALB	no motif/spacing effect	-0.6748771209284974	na
BALB	no motif/spacing effect	-0.828070283235256	na
BALB	no motif/spacing effect	-0.20527494801510215	na
BALB	no motif/spacing effect	-0.35301915081118995	na
BALB	no motif/spacing effect	0.5940688116460526	na
BALB	no motif/spacing effect	0.3624231878669013	na
BALB	no motif/spacing effect	-0.35186843711252	na
BALB	no motif/spacing effect	-0.8580221456434334	na
BALB	no motif/spacing effect	0.237339840192905	na
BALB	no motif/spacing effect	-0.7620565751290366	na
BALB	no motif/spacing effect	-0.45993403725316684	na
BALB	no motif/spacing effect	0.9886465234337956	na
BALB	no motif/spacing effect	0.42255876909937484	na
BALB	no motif/spacing effect	-0.8846142747981807	na
BALB	no motif/spacing effect	-0.08592072639464554	na
BALB	no motif/spacing effect	0.030831865671442138	na
BALB	no motif/spacing effect	-0.18305243542792482	na
BALB	no motif/spacing effect	-0.3459863663995906	na
BALB	no motif/spacing effect	0.3246463762405227	na
BALB	no motif/spacing effect	0.030837403922593154	na
BALB	no motif/spacing effect	-0.9846694534718665	na
BALB	no motif/spacing effect	-0.5208998157411076	na
BALB	no motif/spacing effect	-0.6557014033758071	na
BALB	no motif/spacing effect	-0.40420420023484116	na
BALB	no motif/spacing effect	-0.6985587595423279	na
BALB	no motif/spacing effect	0.956979292719923	na
BALB	no motif/spacing effect	-0.5172178940853227	na
BALB	no motif/spacing effect	0.7007169018572519	na
BALB	no motif/spacing effect	-0.3780347955977481	na
BALB	no motif/spacing effect	-0.915871594346533	na
BALB	no motif/spacing effect	-0.966548046637751	na
BALB	no motif/spacing effect	-0.46494217271225224	na
BALB	no motif/spacing effect	-0.32907120419231495	na
BALB	no motif/spacing effect	0.4494709963427177	na
BALB	no motif/spacing effect	-0.6286063127782038	na
BALB	no motif/spacing effect	-0.5256683040887733	na
BALB	no motif/spacing effect	1.254382535580885	na
BALB	no motif/spacing effect	-0.6680484073420168	na
BALB	no motif/spacing effect	-0.6894180527010461	na
BALB	no motif/spacing effect	-0.47839459941606854	na
BALB	no motif/spacing effect	-0.5874068593565385	na
BALB	no motif/spacing effect	-1.0070712233660148	na
BALB	no motif/spacing effect	-0.497011487681835	na
BALB	no motif/spacing effect	-1.4207616502461011	na
BALB	no motif/spacing effect	-1.4906811554324526	na
BALB	no motif/spacing effect	-0.4848761897544298	na
BALB	no motif/spacing effect	-1.2477702971800517	na
BALB	no motif/spacing effect	-0.8995043979675801	na
BALB	no motif/spacing effect	-0.2904076725635898	na
BALB	no motif/spacing effect	-2.344449787180097	na
BALB	no motif/spacing effect	-1.4082917398628991	na
BALB	no motif/spacing effect	-2.112464096148467	na
BALB	no motif/spacing effect	-0.10904921294951464	na
BALB	no motif/spacing effect	-1.1913764473793318	na
BALB	no motif/spacing effect	-0.19487662524097882	na
BALB	no motif/spacing effect	0.13634292783559854	na
BALB	no motif/spacing effect	-0.6753653271770856	na
BALB	no motif/spacing effect	0.6407943762760446	na
BALB	no motif/spacing effect	-1.6566317504345038	na
BALB	no motif/spacing effect	1.3730383602838772	na
BALB	no motif/spacing effect	-0.3458725638555453	na
BALB	no motif/spacing effect	-0.47438045609351054	na
BALB	no motif/spacing effect	0.9260451320510823	na
BALB	no motif/spacing effect	-0.7508766122554071	na
BALB	no motif/spacing effect	-0.35392204404175054	na
BALB	no motif/spacing effect	0.24225804474566548	na
BALB	no motif/spacing effect	-1.4192844703790295	na
BALB	no motif/spacing effect	-1.0013972834418052	na
BALB	no motif/spacing effect	-0.7568092818786694	na
BALB	no motif/spacing effect	-0.723750271373035	na
BALB	no motif/spacing effect	-1.450301387785938	na
BALB	no motif/spacing effect	-1.2112635825266365	na
BALB	no motif/spacing effect	-0.8872715598508378	na
BALB	no motif/spacing effect	-0.777773396150188	na
BALB	no motif/spacing effect	1.1886615640238984	na
BALB	no motif/spacing effect	-0.029910096029869493	na
BALB	no motif/spacing effect	0.015290149937725594	na
BALB	no motif/spacing effect	-0.9822285277103138	na
BALB	no motif/spacing effect	0.36750530489917477	na
BALB	no motif/spacing effect	2.6041738683229525	na
BALB	no motif/spacing effect	-1.1415245756407852	na
BALB	no motif/spacing effect	-1.1300178889523749	na
BALB	no motif/spacing effect	-0.5662024817813434	na
BALB	no motif/spacing effect	-0.3483303557023021	na
BALB	no motif/spacing effect	-0.7707516941514596	na
BALB	no motif/spacing effect	-0.15324840646228477	na
BALB	no motif/spacing effect	-0.9924721912200907	na
BALB	no motif/spacing effect	-2.323370069061269	na
BALB	no motif/spacing effect	-0.7411023954867932	na
BALB	no motif/spacing effect	-1.1084984830986695	na
BALB	no motif/spacing effect	-0.8010959315859214	na
BALB	no motif/spacing effect	-0.6783694600360168	na
BALB	no motif/spacing effect	0.15462686855253338	na
BALB	no motif/spacing effect	-1.9045179142807624	na
BALB	no motif/spacing effect	-0.19821283474067553	na
BALB	no motif/spacing effect	-1.1572083938888698	na
BALB	no motif/spacing effect	0.146274762739254	na
BALB	no motif/spacing effect	-2.1715816230601543	na
BALB	no motif/spacing effect	-0.364168808259703	na
BALB	no motif/spacing effect	-1.2363036549844315	na
BALB	no motif/spacing effect	-1.6605586444979323	na
BALB	no motif/spacing effect	-1.1481174569935835	na
BALB	no motif/spacing effect	-0.34915655185632843	na
BALB	no motif/spacing effect	-1.120788222779511	na
BALB	no motif/spacing effect	0.05150856855941832	na
BALB	no motif/spacing effect	-0.4697416029325039	na
BALB	no motif/spacing effect	-1.099903909692082	na
BALB	no motif/spacing effect	1.3335627953707656	na
BALB	no motif/spacing effect	-0.8153701899951522	na
BALB	no motif/spacing effect	-0.8395633068646093	na
BALB	no motif/spacing effect	-1.7747010564034604	na
BALB	no motif/spacing effect	0.30691828036802615	na
BALB	no motif/spacing effect	-0.7461563817681016	na
BALB	no motif/spacing effect	-0.6780107450280877	na
BALB	no motif/spacing effect	-0.44594434612483	na
BALB	no motif/spacing effect	0.6625780117290008	na
BALB	no motif/spacing effect	-0.595876609934324	na
BALB	no motif/spacing effect	-1.010171805057291	na
BALB	no motif/spacing effect	-0.37328200537673073	na
BALB	no motif/spacing effect	1.417954982661138	na
BALB	no motif/spacing effect	-0.6078737226483328	na
BALB	no motif/spacing effect	-0.5359947594837333	na
BALB	no motif/spacing effect	0.35762277715956614	na
BALB	no motif/spacing effect	-0.5680821009541432	na
BALB	no motif/spacing effect	-0.39655807867118353	na
BALB	no motif/spacing effect	-2.521653828266628	na
BALB	no motif/spacing effect	-0.4984672447372134	na
BALB	no motif/spacing effect	0.6121031088320117	na
BALB	no motif/spacing effect	-0.6524216161406846	na
BALB	no motif/spacing effect	-0.7614284009695798	na
BALB	no motif/spacing effect	-0.810185519148944	na
BALB	no motif/spacing effect	0.08386346617031304	na
BALB	no motif/spacing effect	0.4906245254261936	na
BALB	no motif/spacing effect	0.8300303600255012	na
BALB	no motif/spacing effect	-0.2365944226359984	na
BALB	no motif/spacing effect	0.4770875262575124	na
BALB	no motif/spacing effect	-0.18780289263380467	na
BALB	no motif/spacing effect	-1.1567329952299872	na
BALB	no motif/spacing effect	-0.4795126513545558	na
BALB	no motif/spacing effect	-0.617914014079429	na
BALB	no motif/spacing effect	1.7667776454628001	na
BALB	no motif/spacing effect	-0.8024796000852872	na
BALB	no motif/spacing effect	-0.18874434941177487	na
BALB	no motif/spacing effect	-1.2404189838835813	na
BALB	no motif/spacing effect	-1.4674111011347222	na
BALB	no motif/spacing effect	-0.25128340014143635	na
BALB	no motif/spacing effect	-0.39812375250769483	na
BALB	no motif/spacing effect	-1.0746138762096216	na
BALB	no motif/spacing effect	-3.452899881205565	na
BALB	no motif/spacing effect	-0.8688522691534866	na
BALB	no motif/spacing effect	-3.138488074543984	na
BALB	no motif/spacing effect	0.015472373452884547	na
BALB	no motif/spacing effect	0.9111675547979752	na
BALB	no motif/spacing effect	-0.4060487160515893	na
BALB	no motif/spacing effect	0.1911581760363652	na
BALB	no motif/spacing effect	1.0151864038146763	na
BALB	no motif/spacing effect	1.0851980134054773	na
BALB	no motif/spacing effect	0.02799101703743645	na
BALB	no motif/spacing effect	-0.6787415245448907	na
BALB	no motif/spacing effect	-0.7812481886145628	na
BALB	no motif/spacing effect	-0.1160910309575991	na
BALB	no motif/spacing effect	-0.7846177081716998	na
BALB	no motif/spacing effect	-3.6915579229582276	na
BALB	no motif/spacing effect	0.026281844528311282	na
BALB	no motif/spacing effect	-0.5136037396876985	na
BALB	no motif/spacing effect	-0.5659846730323932	na
BALB	no motif/spacing effect	-2.1098526682260577	na
BALB	no motif/spacing effect	-1.230810435848055	na
BALB	no motif/spacing effect	-0.28519692465960755	na
BALB	no motif/spacing effect	-0.5888355098683622	na
BALB	no motif/spacing effect	-1.2479998961062648	na
BALB	no motif/spacing effect	-1.0040813793669576	na
BALB	no motif/spacing effect	-0.025102623346197284	na
BALB	no motif/spacing effect	-0.806360638015156	na
BALB	no motif/spacing effect	0.2733049233887046	na
BALB	no motif/spacing effect	-0.30432261432442553	na
BALB	no motif/spacing effect	-0.1062476295022643	na
BALB	no motif/spacing effect	-0.700881201810847	na
BALB	no motif/spacing effect	1.0866256712385178	na
BALB	no motif/spacing effect	-0.9804730980279155	na
BALB	no motif/spacing effect	-1.171494221304311	na
BALB	no motif/spacing effect	-0.6608150712784271	na
BALB	no motif/spacing effect	-0.8662181902308059	na
BALB	no motif/spacing effect	-0.8277678605433154	na
BALB	no motif/spacing effect	-0.060108830983612194	na
BALB	no motif/spacing effect	0.4355886212632125	na
BALB	no motif/spacing effect	-0.5692143380487904	na
BALB	no motif/spacing effect	-1.1828421641335218	na
BALB	no motif/spacing effect	-0.6150527306387215	na
BALB	no motif/spacing effect	-0.9871814603908389	na
BALB	no motif/spacing effect	-1.1749189090460224	na
BALB	no motif/spacing effect	-0.7378033577795611	na
BALB	no motif/spacing effect	0.9073596884563804	na
BALB	no motif/spacing effect	-0.17471982640669736	na
BALB	no motif/spacing effect	-1.2162431444433253	na
BALB	no motif/spacing effect	-0.13606154957602845	na
BALB	no motif/spacing effect	0.5887733401881139	na
BALB	no motif/spacing effect	-1.0241864637865508	na
BALB	no motif/spacing effect	-0.20069226896821846	na
BALB	no motif/spacing effect	-0.6195112715268074	na
BALB	no motif/spacing effect	-0.24656399949800356	na
BALB	no motif/spacing effect	0.22529844516299624	na
BALB	no motif/spacing effect	0.7878068907142239	na
BALB	no motif/spacing effect	0.6415064223548503	na
BALB	no motif/spacing effect	-0.3555437053180148	na
BALB	no motif/spacing effect	1.1926794798367117	na
BALB	no motif/spacing effect	-0.9183154450184716	na
BALB	no motif/spacing effect	-0.5337140511665552	na
BALB	no motif/spacing effect	-0.2315813243120255	na
BALB	no motif/spacing effect	0.21350486418662662	na
BALB	no motif/spacing effect	-1.1856541158987945	na
BALB	no motif/spacing effect	-0.45298923907043065	na
BALB	no motif/spacing effect	-0.7295809992604418	na
BALB	no motif/spacing effect	-0.7439277749971582	na
BALB	no motif/spacing effect	-0.44988063690677116	na
BALB	no motif/spacing effect	0.07724445092095422	na
BALB	no motif/spacing effect	-1.368971201113741	na
BALB	no motif/spacing effect	-0.37524595533289373	na
BALB	no motif/spacing effect	-0.26332155422428993	na
BALB	no motif/spacing effect	-2.212569338850806	na
BALB	no motif/spacing effect	-0.6181540155630776	na
BALB	no motif/spacing effect	0.7122321015792155	na
BALB	no motif/spacing effect	-0.7111899189327167	na
BALB	no motif/spacing effect	-1.6289322458285387	na
BALB	no motif/spacing effect	-0.5445938873415272	na
BALB	no motif/spacing effect	0.14424825338328162	na
BALB	no motif/spacing effect	-0.9845049480835186	na
BALB	no motif/spacing effect	-0.6627015157571297	na
BALB	no motif/spacing effect	2.3798199359857306	na
BALB	no motif/spacing effect	-0.33383018394365394	na
BALB	no motif/spacing effect	-0.8856575069485908	na
BALB	no motif/spacing effect	-1.4980965060935416	na
BALB	no motif/spacing effect	0.36824782522598376	na
BALB	no motif/spacing effect	-0.24859057345161073	na
BALB	no motif/spacing effect	-0.5619520365705393	na
BALB	no motif/spacing effect	-0.17734741157254152	na
BALB	no motif/spacing effect	-0.7332510800885563	na
BALB	no motif/spacing effect	0.7628896340613496	na
BALB	no motif/spacing effect	-1.2415472951792683	na
BALB	no motif/spacing effect	-0.8240723170025381	na
BALB	no motif/spacing effect	-0.4570729736711927	na
BALB	no motif/spacing effect	0.26667849729107385	na
BALB	no motif/spacing effect	1.0544998621756498	na
BALB	no motif/spacing effect	-0.07774298312959393	na
BALB	no motif/spacing effect	0.4193584414632556	na
BALB	no motif/spacing effect	0.850296022644538	na
BALB	no motif/spacing effect	-0.9590097808860305	na
BALB	no motif/spacing effect	-3.2918392732571147	na
BALB	no motif/spacing effect	-1.3312374176547368	na
BALB	no motif/spacing effect	2.9501756223399114	na
BALB	no motif/spacing effect	-0.9987891774019522	na
BALB	no motif/spacing effect	-0.4150374992788439	na
BALB	no motif/spacing effect	1.791188941503361	na
BALB	no motif/spacing effect	-0.5039889290259456	na
BALB	no motif/spacing effect	-1.3081040485284925	na
BALB	no motif/spacing effect	-0.2931154446423454	na
BALB	no motif/spacing effect	1.635793283978185	na
BALB	no motif/spacing effect	0.009127697044418959	na
BALB	no motif/spacing effect	-0.16492074919055888	na
BALB	no motif/spacing effect	-0.7552947771575562	na
BALB	no motif/spacing effect	0.29163519989616216	na
BALB	no motif/spacing effect	-1.1087103984039857	na
BALB	no motif/spacing effect	-0.06636332292540192	na
BALB	no motif/spacing effect	-0.39118974048239163	na
BALB	no motif/spacing effect	1.1583701739014902	na
BALB	no motif/spacing effect	-0.40455142818907674	na
BALB	no motif/spacing effect	-0.8950304403984575	na
BALB	no motif/spacing effect	-0.41601115463216853	na
BALB	no motif/spacing effect	-1.451540833017832	na
BALB	no motif/spacing effect	-0.5447649360334257	na
BALB	no motif/spacing effect	-0.5579521763809474	na
BALB	no motif/spacing effect	0.9733468977802069	na
BALB	no motif/spacing effect	-0.8663145613770471	na
BALB	no motif/spacing effect	-0.9127823512306446	na
BALB	no motif/spacing effect	0.3068907129118763	na
BALB	no motif/spacing effect	-0.4847085323877214	na
BALB	no motif/spacing effect	-0.5404091581445636	na
BALB	no motif/spacing effect	-0.6878800169429589	na
BALB	no motif/spacing effect	0.27515508221000085	na
BALB	no motif/spacing effect	-0.08846571017132909	na
BALB	no motif/spacing effect	-0.8305019060473127	na
BALB	no motif/spacing effect	-0.3044450831685701	na
BALB	no motif/spacing effect	0.1909287527163137	na
BALB	no motif/spacing effect	-0.02066705924453105	na
BALB	no motif/spacing effect	-0.789949241940251	na
BALB	no motif/spacing effect	-0.4453392570173218	na
BALB	no motif/spacing effect	-0.6206327702918819	na
BALB	no motif/spacing effect	-0.29652257122052417	na
BALB	no motif/spacing effect	-0.3365785585764085	na
BALB	no motif/spacing effect	-0.857513068735809	na
BALB	no motif/spacing effect	-0.5412540074568337	na
BALB	no motif/spacing effect	-0.5152710822399129	na
BALB	no motif/spacing effect	0.3042453185229843	na
BALB	no motif/spacing effect	0.03230880675312786	na
BALB	no motif/spacing effect	0.6952780130253129	na
BALB	no motif/spacing effect	-0.9182441210792165	na
BALB	no motif/spacing effect	-0.5290268981179258	na
BALB	no motif/spacing effect	-0.9856072511065106	na
BALB	no motif/spacing effect	-0.8815114995772948	na
BALB	no motif/spacing effect	0.719941623055544	na
BALB	no motif/spacing effect	0.0691023423146726	na
BALB	no motif/spacing effect	-0.7299745343889459	na
BALB	no motif/spacing effect	-1.062745714962893	na
BALB	no motif/spacing effect	-0.4056286790542796	na
BALB	no motif/spacing effect	-0.728613177784398	na
BALB	no motif/spacing effect	-0.9649461293659267	na
BALB	no motif/spacing effect	-0.10274954373350997	na
BALB	no motif/spacing effect	-0.2819066789056972	na
BALB	no motif/spacing effect	-0.2217866822904373	na
BALB	no motif/spacing effect	-0.015825749120597976	na
BALB	no motif/spacing effect	-1.2455699340655126	na
BALB	no motif/spacing effect	-0.49762501855686603	na
BALB	no motif/spacing effect	-0.522414161484944	na
BALB	no motif/spacing effect	-0.5145426715550947	na
BALB	no motif/spacing effect	-0.6639900024622403	na
BALB	no motif/spacing effect	2.4356285940520905	na
BALB	no motif/spacing effect	0.46875741090939105	na
BALB	no motif/spacing effect	0.12315398818431866	na
BALB	no motif/spacing effect	-0.7639586506586182	na
BALB	no motif/spacing effect	-1.435356239358876	na
BALB	no motif/spacing effect	0.09211551536296181	na
BALB	no motif/spacing effect	1.0102859058329052	na
BALB	no motif/spacing effect	0.28271879851763604	na
BALB	no motif/spacing effect	-0.16292915466771163	na
BALB	no motif/spacing effect	0.7531969717486229	na
BALB	no motif/spacing effect	-0.3798223010423065	na
BALB	no motif/spacing effect	-0.039448884300937515	na
BALB	no motif/spacing effect	-0.8223155519013119	na
BALB	no motif/spacing effect	0.7393670319958057	na
BALB	no motif/spacing effect	-1.293908903707508	na
BALB	no motif/spacing effect	-0.9614454308793761	na
BALB	no motif/spacing effect	-1.4073365359689847	na
BALB	no motif/spacing effect	-1.6967398383769634	na
BALB	no motif/spacing effect	-0.3170682585830429	na
BALB	no motif/spacing effect	0.6196614030543062	na
BALB	no motif/spacing effect	-1.2633150699973257	na
BALB	no motif/spacing effect	-0.6706855916555963	na
BALB	no motif/spacing effect	-0.94940303670578	na
BALB	no motif/spacing effect	-0.9050326493879362	na
BALB	no motif/spacing effect	-1.9394054752690453	na
BALB	no motif/spacing effect	-0.9215949986331529	na
BALB	no motif/spacing effect	-0.589106219797757	na
BALB	no motif/spacing effect	-0.07555702948268639	na
BALB	no motif/spacing effect	0.022331022806463707	na
BALB	no motif/spacing effect	0.48061708772466183	na
BALB	no motif/spacing effect	0.16841664727098404	na
BALB	no motif/spacing effect	0.9311381418551958	na
BALB	no motif/spacing effect	-0.9162514420046612	na
BALB	no motif/spacing effect	-1.0796859982117093	na
BALB	no motif/spacing effect	0.8783420451961605	na
BALB	no motif/spacing effect	-0.31772316683040724	na
BALB	no motif/spacing effect	-1.4031471350284255	na
BALB	no motif/spacing effect	0.0677838553964687	na
BALB	no motif/spacing effect	-0.8553958215995303	na
BALB	no motif/spacing effect	-1.08830841812766	na
BALB	no motif/spacing effect	1.7522438992627158	na
BALB	no motif/spacing effect	3.08901558730728	na
BALB	no motif/spacing effect	0.32861362291925333	na
BALB	no motif/spacing effect	-0.09341797526054041	na
BALB	no motif/spacing effect	1.0946969551392662	na
BALB	no motif/spacing effect	1.1747398379057175	na
BALB	no motif/spacing effect	-0.8423800512974502	na
BALB	no motif/spacing effect	-0.7216334148036898	na
BALB	no motif/spacing effect	-0.9313267594624746	na
BALB	no motif/spacing effect	-1.1588749447873852	na
BALB	no motif/spacing effect	-0.9531673030145766	na
BALB	no motif/spacing effect	0.5857458929216	na
BALB	no motif/spacing effect	-0.013663539650754508	na
BALB	no motif/spacing effect	-0.7499431472254185	na
BALB	no motif/spacing effect	-0.6653341129514709	na
BALB	no motif/spacing effect	-0.6665398743281097	na
BALB	no motif/spacing effect	-0.7300996916613318	na
BALB	no motif/spacing effect	0.16217798404873118	na
BALB	no motif/spacing effect	-0.13088629998051804	na
BALB	no motif/spacing effect	-0.5461499856083423	na
BALB	no motif/spacing effect	-0.7779430111321375	na
BALB	no motif/spacing effect	-0.3829458820482188	na
BALB	no motif/spacing effect	0.1253901279150229	na
BALB	no motif/spacing effect	-0.22236989418586894	na
BALB	no motif/spacing effect	-0.27061672322406416	na
BALB	no motif/spacing effect	-0.49298170902871874	na
BALB	no motif/spacing effect	0.08438573284214357	na
BALB	no motif/spacing effect	-1.266380433713785	na
BALB	no motif/spacing effect	-0.7808216429472079	na
BALB	no motif/spacing effect	0.29037665403288937	na
BALB	no motif/spacing effect	1.0023739782638303	na
BALB	no motif/spacing effect	-0.4653609619563257	na
BALB	no motif/spacing effect	-0.3276547059143198	na
BALB	no motif/spacing effect	0.3108725000568757	na
BALB	no motif/spacing effect	-2.3896569446105786	na
BALB	no motif/spacing effect	0.6237921190081188	na
BALB	no motif/spacing effect	-0.8160145418627556	na
BALB	no motif/spacing effect	0.3198544609718841	na
BALB	no motif/spacing effect	-0.30309048070836475	na
BALB	no motif/spacing effect	-0.4925003834298427	na
BALB	no motif/spacing effect	-0.5588812435342838	na
BALB	no motif/spacing effect	-1.5908623110077027	na
BALB	no motif/spacing effect	-0.5040916654653858	na
BALB	no motif/spacing effect	0.39008007645727627	na
BALB	no motif/spacing effect	-0.19038142264840907	na
BALB	no motif/spacing effect	0.143172273836627	na
BALB	no motif/spacing effect	-0.1685121806104899	na
BALB	no motif/spacing effect	0.1615730440011225	na
BALB	no motif/spacing effect	1.6284204564049323	na
BALB	no motif/spacing effect	0.38702312310924736	na
BALB	no motif/spacing effect	-0.6499492632088053	na
BALB	no motif/spacing effect	-0.2093659890710864	na
BALB	no motif/spacing effect	0.0	na
BALB	no motif/spacing effect	-0.8683611392757564	na
BALB	no motif/spacing effect	-0.019739942870666383	na
BALB	no motif/spacing effect	-1.0718446579657268	na
BALB	no motif/spacing effect	1.1182255280048752	na
BALB	no motif/spacing effect	-0.5245693151461968	na
BALB	no motif/spacing effect	0.27251009457060427	na
BALB	no motif/spacing effect	-0.10515595069769645	na
BALB	no motif/spacing effect	-0.3156322624208343	na
BALB	no motif/spacing effect	0.645208384462483	na
BALB	no motif/spacing effect	-0.9452802610726989	na
BALB	no motif/spacing effect	-0.15594766692618833	na
BALB	no motif/spacing effect	-1.0162558907579196	na
BALB	no motif/spacing effect	-0.08936781832006258	na
BALB	no motif/spacing effect	-0.2587446918119305	na
BALB	no motif/spacing effect	0.7152479994332905	na
BALB	no motif/spacing effect	0.34852230489907576	na
BALB	no motif/spacing effect	0.015120086424118107	na
BALB	no motif/spacing effect	-0.17222649659541123	na
BALB	no motif/spacing effect	-0.7396572150322918	na
BALB	no motif/spacing effect	0.024354084623833927	na
BALB	no motif/spacing effect	-0.9510192273703062	na
BALB	no motif/spacing effect	0.8683634832820615	na
BALB	no motif/spacing effect	-1.0134832293636222	na
BALB	no motif/spacing effect	-0.7536086304895386	na
BALB	no motif/spacing effect	0.16848302726840592	na
BALB	no motif/spacing effect	-0.5701566903749606	na
BALB	no motif/spacing effect	-1.4721890237652397	na
BALB	no motif/spacing effect	-0.28576917405356106	na
BALB	no motif/spacing effect	1.1145776133246343	na
BALB	no motif/spacing effect	-0.5565593249831675	na
BALB	no motif/spacing effect	-0.4361034514892701	na
BALB	no motif/spacing effect	-0.7676585496780657	na
BALB	no motif/spacing effect	0.9206858663956892	na
BALB	no motif/spacing effect	1.3598053192691264	na
BALB	no motif/spacing effect	-0.6669373731858492	na
BALB	no motif/spacing effect	0.11195378729707617	na
BALB	no motif/spacing effect	-0.4775821981291113	na
BALB	no motif/spacing effect	-0.44532871715872613	na
BALB	no motif/spacing effect	-0.2416552940210499	na
BALB	no motif/spacing effect	-0.21604445525396354	na
BALB	no motif/spacing effect	-0.14449142536384763	na
BALB	no motif/spacing effect	-0.48796728084332575	na
BALB	no motif/spacing effect	0.8204752813071243	na
BALB	no motif/spacing effect	-1.3525424836752036	na
BALB	no motif/spacing effect	-0.7305673162925048	na
BALB	no motif/spacing effect	-1.1658260767586492	na
BALB	no motif/spacing effect	-0.7188666868616922	na
BALB	no motif/spacing effect	-0.9992611577344297	na
BALB	no motif/spacing effect	-0.1742216950157056	na
BALB	no motif/spacing effect	-1.280743187825144	na
BALB	no motif/spacing effect	-0.2007512580193076	na
BALB	no motif/spacing effect	0.12215615530320267	na
BALB	no motif/spacing effect	0.3527603462431843	na
BALB	no motif/spacing effect	-0.519114442882918	na
BALB	no motif/spacing effect	-0.3574111987373936	na
BALB	no motif/spacing effect	-0.4995400975775688	na
BALB	no motif/spacing effect	0.5102622926723299	na
BALB	no motif/spacing effect	0.6325910021751824	na
BALB	no motif/spacing effect	0.26707926567122975	na
BALB	no motif/spacing effect	-1.0599685891710116	na
BALB	no motif/spacing effect	0.41418374048928897	na
BALB	no motif/spacing effect	-0.5540018374828728	na
BALB	no motif/spacing effect	-0.0035316909702531873	na
BALB	no motif/spacing effect	-0.8580183711309131	na
BALB	no motif/spacing effect	-0.6888643462193942	na
BALB	no motif/spacing effect	-0.24029506644346021	na
BALB	no motif/spacing effect	-0.42499878170523697	na
BALB	no motif/spacing effect	-1.0655080472148333	na
BALB	no motif/spacing effect	0.9708285751140373	na
BALB	no motif/spacing effect	-0.2970865492749084	na
BALB	no motif/spacing effect	0.0021420865715411352	na
BALB	no motif/spacing effect	-0.3183255122370916	na
BALB	no motif/spacing effect	-0.5042910951764199	na
BALB	no motif/spacing effect	-0.1682303516917414	na
BALB	no motif/spacing effect	0.1679107953227028	na
BALB	no motif/spacing effect	-1.026865595106564	na
BALB	no motif/spacing effect	-1.2396227919981682	na
BALB	no motif/spacing effect	-0.3977505791598377	na
BALB	no motif/spacing effect	-0.064887012211015	na
BALB	no motif/spacing effect	-1.699779778034947	na
BALB	no motif/spacing effect	-1.2546154745137255	na
BALB	no motif/spacing effect	-0.6592088355154784	na
BALB	no motif/spacing effect	0.16459857040856596	na
BALB	no motif/spacing effect	-0.6057735960750721	na
BALB	no motif/spacing effect	-0.02635884986811554	na
BALB	no motif/spacing effect	-0.4245497052390057	na
BALB	no motif/spacing effect	-0.08456234440911814	na
BALB	no motif/spacing effect	-0.339284794242376	na
BALB	no motif/spacing effect	-1.3545901920656722	na
BALB	no motif/spacing effect	-0.44957062209522203	na
BALB	no motif/spacing effect	-0.6314895450893125	na
BALB	no motif/spacing effect	-0.11367680457113138	na
BALB	no motif/spacing effect	-0.8295563693377535	na
BALB	no motif/spacing effect	0.43432883788760357	na
BALB	no motif/spacing effect	0.19901641763273314	na
BALB	no motif/spacing effect	-0.4811590948900184	na
BALB	no motif/spacing effect	-0.3923101429295306	na
BALB	no motif/spacing effect	-0.9774936183522884	na
BALB	no motif/spacing effect	-0.8147502077773803	na
BALB	no motif/spacing effect	0.03349756559408412	na
BALB	no motif/spacing effect	-0.4147243260644915	na
BALB	no motif/spacing effect	-0.3545495164565602	na
BALB	no motif/spacing effect	0.8354966322997361	na
BALB	no motif/spacing effect	-0.34591313862402373	na
BALB	no motif/spacing effect	-0.29388346370741747	na
BALB	no motif/spacing effect	-1.2043584985061866	na
BALB	no motif/spacing effect	2.014528773752583	na
BALB	no motif/spacing effect	0.0010865713493393159	na
BALB	no motif/spacing effect	-0.09150729979497996	na
BALB	no motif/spacing effect	2.240158539145028	na
BALB	no motif/spacing effect	-1.0390826752609765	na
BALB	no motif/spacing effect	-1.2406243784985702	na
BALB	no motif/spacing effect	-0.3799931273884045	na
BALB	no motif/spacing effect	-1.038314827180188	na
BALB	no motif/spacing effect	-0.4334086767381935	na
BALB	no motif/spacing effect	-0.4233626026326194	na
BALB	no motif/spacing effect	-0.4574061572323691	na
BALB	no motif/spacing effect	1.6436733657255367	na
BALB	no motif/spacing effect	0.6553234517271784	na
BALB	no motif/spacing effect	0.5445571982095583	na
BALB	no motif/spacing effect	-0.1056726913643029	na
BALB	no motif/spacing effect	0.5083662435328891	na
BALB	no motif/spacing effect	1.0426443374084937	na
BALB	no motif/spacing effect	-0.8830033563828632	na
BALB	no motif/spacing effect	-1.5142935536718156	na
BALB	no motif/spacing effect	0.8029521153562151	na
BALB	no motif/spacing effect	-0.7599497457476501	na
BALB	no motif/spacing effect	1.1003754262177492	na
BALB	no motif/spacing effect	-1.399804716769606	na
BALB	no motif/spacing effect	-0.426614202455021	na
BALB	no motif/spacing effect	-0.6088861733463382	na
BALB	no motif/spacing effect	-0.5343605072833393	na
BALB	no motif/spacing effect	-0.22453864380078414	na
BALB	no motif/spacing effect	-1.0853281769493952	na
BALB	no motif/spacing effect	-0.3460997722243766	na
BALB	no motif/spacing effect	-1.1381913168084044	na
BALB	no motif/spacing effect	-0.11648961179494499	na
BALB	no motif/spacing effect	0.4511770326292659	na
BALB	no motif/spacing effect	-0.23036408989267532	na
BALB	no motif/spacing effect	-0.4548568173922294	na
BALB	no motif/spacing effect	-0.39342203393140096	na
BALB	no motif/spacing effect	0.6785755514926484	na
BALB	no motif/spacing effect	-0.28073640756725293	na
BALB	no motif/spacing effect	0.42312779716176596	na
BALB	no motif/spacing effect	-0.6278833676253766	na
BALB	no motif/spacing effect	0.20273873967733014	na
BALB	no motif/spacing effect	-2.02482482889171	na
BALB	no motif/spacing effect	-0.8663364972578842	na
BALB	no motif/spacing effect	-0.31321263851139225	na
BALB	no motif/spacing effect	-0.9422810959902312	na
BALB	no motif/spacing effect	-1.0845178711562702	na
BALB	no motif/spacing effect	-0.5742727763905464	na
BALB	no motif/spacing effect	-0.37327300442207445	na
BALB	no motif/spacing effect	-0.3364903890902542	na
BALB	no motif/spacing effect	-2.361836816323999	na
BALB	no motif/spacing effect	-1.0228972687999676	na
BALB	no motif/spacing effect	1.6934869574993252	na
BALB	no motif/spacing effect	-0.47525684070220686	na
BALB	no motif/spacing effect	-2.5556886916131414	na
BALB	no motif/spacing effect	-0.6164898696579479	na
BALB	no motif/spacing effect	-0.26200383572004515	na
BALB	no motif/spacing effect	-1.1521099930486578	na
BALB	no motif/spacing effect	-2.0515335997029562	na
BALB	no motif/spacing effect	0.08991220784603637	na
BALB	no motif/spacing effect	-0.8064019957782724	na
BALB	no motif/spacing effect	-1.2459054126573283	na
BALB	no motif/spacing effect	-0.13274465181790163	na
BALB	no motif/spacing effect	-0.8832676059468723	na
BALB	no motif/spacing effect	-1.1968183216496948	na
BALB	no motif/spacing effect	-0.07983935269665388	na
BALB	no motif/spacing effect	-0.8910232803132487	na
BALB	no motif/spacing effect	-0.5865714971894098	na
BALB	no motif/spacing effect	1.5022557537623196	na
BALB	no motif/spacing effect	-0.32057203133850987	na
BALB	no motif/spacing effect	1.7102352285516844	na
BALB	no motif/spacing effect	-0.513245668829633	na
BALB	no motif/spacing effect	-0.2957612804453662	na
BALB	no motif/spacing effect	0.4054922231671574	na
BALB	no motif/spacing effect	-0.23636915491307064	na
BALB	no motif/spacing effect	-0.07476009451258969	na
BALB	no motif/spacing effect	1.793759688838266	na
BALB	no motif/spacing effect	-0.18990685315412836	na
BALB	no motif/spacing effect	0.4956254207650099	na
BALB	no motif/spacing effect	-0.002541696922073733	na
BALB	no motif/spacing effect	-0.16082279433505975	na
BALB	no motif/spacing effect	0.6612490613890145	na
BALB	no motif/spacing effect	0.77737042981106	na
BALB	no motif/spacing effect	-0.8399109362738595	na
BALB	no motif/spacing effect	0.26800981973630744	na
BALB	no motif/spacing effect	0.0872210420306514	na
BALB	no motif/spacing effect	-0.16931069654016762	na
BALB	no motif/spacing effect	0.6645240481518373	na
BALB	no motif/spacing effect	-0.3614233483745224	na
BALB	no motif/spacing effect	-0.5029455205990248	na
BALB	no motif/spacing effect	-1.2599778474004553	na
BALB	no motif/spacing effect	-0.3854418060255371	na
BALB	no motif/spacing effect	-1.508406644200944	na
BALB	no motif/spacing effect	-0.42865131064191875	na
BALB	no motif/spacing effect	0.033858804016035915	na
BALB	no motif/spacing effect	-0.46859636806778004	na
BALB	no motif/spacing effect	-0.2134756558324522	na
BALB	no motif/spacing effect	-0.042772406726129475	na
BALB	no motif/spacing effect	-1.751201847988055	na
BALB	no motif/spacing effect	-0.20932910356042544	na
BALB	no motif/spacing effect	-0.8472749235755277	na
BALB	no motif/spacing effect	-1.0817476154739136	na
BALB	no motif/spacing effect	0.009498659550246646	na
BALB	no motif/spacing effect	1.0075505707198893	na
BALB	no motif/spacing effect	-0.5878113743602578	na
BALB	no motif/spacing effect	2.4236740668126133	na
BALB	no motif/spacing effect	-0.997353975586547	na
BALB	no motif/spacing effect	-0.549291379984469	na
BALB	no motif/spacing effect	-0.2443383121238889	na
BALB	no motif/spacing effect	0.5176122038816668	na
BALB	no motif/spacing effect	-1.214928495695101	na
BALB	no motif/spacing effect	-0.36300596525450857	na
BALB	no motif/spacing effect	-0.5384199147841264	na
BALB	no motif/spacing effect	-0.25837302846393095	na
BALB	no motif/spacing effect	-0.4373042940044485	na
BALB	no motif/spacing effect	0.3691219875770315	na
BALB	no motif/spacing effect	-1.3017209757492143	na
BALB	no motif/spacing effect	-0.955253334646649	na
BALB	no motif/spacing effect	-0.5355138825757013	na
BALB	no motif/spacing effect	-1.995281022371565	na
BALB	no motif/spacing effect	-0.5524038260298747	na
BALB	no motif/spacing effect	-0.4995568872739984	na
BALB	no motif/spacing effect	-0.9416860954539787	na
BALB	no motif/spacing effect	-0.19882795795701824	na
BALB	no motif/spacing effect	-0.370094082248845	na
BALB	no motif/spacing effect	-0.530058701573167	na
BALB	no motif/spacing effect	-0.5783013652877367	na
BALB	no motif/spacing effect	1.2851071952337096	na
BALB	no motif/spacing effect	-0.9639903565005516	na
BALB	no motif/spacing effect	-0.07052679942810602	na
BALB	no motif/spacing effect	-0.08175659957593506	na
BALB	no motif/spacing effect	-0.03659826958414669	na
BALB	no motif/spacing effect	-0.042047891746064714	na
BALB	no motif/spacing effect	-1.2839062312123923	na
BALB	no motif/spacing effect	0.6569093443842253	na
BALB	no motif/spacing effect	0.3642315816530024	na
BALB	no motif/spacing effect	-0.9746952024953375	na
BALB	no motif/spacing effect	-1.1192664984207648	na
BALB	no motif/spacing effect	-1.6051951202343346	na
BALB	no motif/spacing effect	0.08179995578955435	na
BALB	no motif/spacing effect	-1.0351303303782284	na
BALB	no motif/spacing effect	-1.2681815722694068	na
BALB	no motif/spacing effect	-1.1725457016014484	na
BALB	no motif/spacing effect	-2.16139622840236	na
BALB	no motif/spacing effect	-1.0598169265287716	na
BALB	no motif/spacing effect	-1.0181169912231693	na
BALB	no motif/spacing effect	-0.09565416937756943	na
BALB	no motif/spacing effect	-0.3336066669650881	na
BALB	no motif/spacing effect	-0.6704094328845835	na
BALB	no motif/spacing effect	-0.5260254555935697	na
BALB	no motif/spacing effect	-1.0498538298795306	na
BALB	no motif/spacing effect	-0.3079683924598262	na
BALB	no motif/spacing effect	0.47983391627865846	na
BALB	no motif/spacing effect	-0.7883040894341331	na
BALB	no motif/spacing effect	1.8838069824954773	na
BALB	no motif/spacing effect	0.10598466635832615	na
BALB	no motif/spacing effect	-0.21173617202771666	na
BALB	no motif/spacing effect	-0.7890966110137447	na
BALB	no motif/spacing effect	-0.7992794769026412	na
BALB	no motif/spacing effect	-0.615945423957152	na
BALB	no motif/spacing effect	-0.6011023052156261	na
BALB	no motif/spacing effect	-0.7318738701346206	na
BALB	no motif/spacing effect	-0.45637166796205264	na
BALB	no motif/spacing effect	0.05804931192713347	na
BALB	no motif/spacing effect	-0.5491649779966767	na
BALB	no motif/spacing effect	1.1514061985085715	na
BALB	no motif/spacing effect	-0.36882335842937675	na
BALB	no motif/spacing effect	-0.8815928083856877	na
BALB	no motif/spacing effect	-2.7081872360207084	na
BALB	no motif/spacing effect	-0.09206919573682537	na
BALB	no motif/spacing effect	0.1195850297973271	na
BALB	no motif/spacing effect	0.2985357423234065	na
BALB	no motif/spacing effect	-0.8614233442477115	na
BALB	no motif/spacing effect	-0.237933921132079	na
BALB	no motif/spacing effect	-1.2925283022302656	na
BALB	no motif/spacing effect	-0.18408178936006703	na
BALB	no motif/spacing effect	-0.43760077017226795	na
BALB	no motif/spacing effect	-0.515358552071354	na
BALB	no motif/spacing effect	-0.8800718241455177	na
BALB	no motif/spacing effect	-0.7279125346516873	na
BALB	no motif/spacing effect	-1.1161394321846263	na
BALB	no motif/spacing effect	-0.9256319402065234	na
BALB	no motif/spacing effect	-0.16467152756501413	na
BALB	no motif/spacing effect	0.037760055639068035	na
BALB	no motif/spacing effect	0.004759410636928418	na
BALB	no motif/spacing effect	-3.6593537591700502	na
BALB	no motif/spacing effect	-1.954432527340475	na
BALB	no motif/spacing effect	-1.0211370959495847	na
BALB	no motif/spacing effect	-0.5705507654829471	na
BALB	no motif/spacing effect	-0.8552098530958219	na
BALB	no motif/spacing effect	-0.49652078685095713	na
BALB	no motif/spacing effect	-0.16196747966339275	na
BALB	no motif/spacing effect	-0.9200243708481386	na
BALB	no motif/spacing effect	-0.5907528896752883	na
BALB	no motif/spacing effect	-0.5711567011961263	na
BALB	no motif/spacing effect	0.8777442499490022	na
BALB	no motif/spacing effect	2.398836080593144	na
BALB	no motif/spacing effect	-0.7673758565111966	na
BALB	no motif/spacing effect	-0.010021075537049562	na
BALB	no motif/spacing effect	-1.2923139827849859	na
BALB	no motif/spacing effect	-0.04486388278868336	na
BALB	no motif/spacing effect	0.47141660225214643	na
BALB	no motif/spacing effect	1.0980715577352491	na
BALB	no motif/spacing effect	-0.35664281122438923	na
BALB	no motif/spacing effect	0.8604161658090179	na
BALB	no motif/spacing effect	-0.8415084353246076	na
BALB	no motif/spacing effect	-0.6834398333216454	na
BALB	no motif/spacing effect	-0.7522451989061363	na
BALB	no motif/spacing effect	-1.845754287405395	na
BALB	no motif/spacing effect	-0.5894983669747313	na
BALB	no motif/spacing effect	-0.31396027406835003	na
BALB	no motif/spacing effect	-0.7846359601796888	na
BALB	no motif/spacing effect	1.9148284150331594	na
BALB	no motif/spacing effect	-1.3950627995175777	na
BALB	no motif/spacing effect	0.03197435815783045	na
BALB	no motif/spacing effect	-0.9093941049508301	na
BALB	no motif/spacing effect	-0.9344650172605053	na
BALB	no motif/spacing effect	-0.32456006073592025	na
BALB	no motif/spacing effect	-0.3136414837024022	na
BALB	no motif/spacing effect	1.4091973161171607	na
BALB	no motif/spacing effect	-1.507204567461347	na
BALB	no motif/spacing effect	-0.3243772916239669	na
BALB	no motif/spacing effect	-0.2264352984165221	na
BALB	no motif/spacing effect	0.3298285580823812	na
BALB	no motif/spacing effect	1.781872610978977	na
BALB	no motif/spacing effect	0.017307603095117807	na
BALB	no motif/spacing effect	0.4013583111524932	na
BALB	no motif/spacing effect	-0.7079044054336094	na
BALB	no motif/spacing effect	-0.3344686746396066	na
BALB	no motif/spacing effect	-0.5304617436300232	na
BALB	no motif/spacing effect	-0.3069547657455658	na
BALB	no motif/spacing effect	-0.5638726382072505	na
BALB	no motif/spacing effect	0.009404982174118004	na
BALB	no motif/spacing effect	-1.3846479539078898	na
BALB	no motif/spacing effect	-0.4058015137288198	na
BALB	no motif/spacing effect	-1.4610259911212626	na
BALB	no motif/spacing effect	-0.10216099287437252	na
BALB	no motif/spacing effect	-0.9566436308056181	na
BALB	no motif/spacing effect	0.16879745015967806	na
BALB	no motif/spacing effect	-0.5406435432601855	na
BALB	no motif/spacing effect	-1.3510315477680654	na
BALB	no motif/spacing effect	-0.5463730238109932	na
BALB	no motif/spacing effect	-0.07629969753336496	na
BALB	no motif/spacing effect	-0.6545366445648719	na
BALB	no motif/spacing effect	-0.03882555211682348	na
BALB	no motif/spacing effect	-1.239939304511669	na
BALB	no motif/spacing effect	-0.8135680494949655	na
BALB	no motif/spacing effect	-0.15819492715931815	na
BALB	no motif/spacing effect	-1.2417899513249449	na
BALB	no motif/spacing effect	-0.6626476983791854	na
BALB	no motif/spacing effect	-0.8271028446906703	na
BALB	no motif/spacing effect	-0.8032801133394303	na
BALB	no motif/spacing effect	-2.3215996124085096	na
BALB	no motif/spacing effect	-0.8320893950539654	na
BALB	no motif/spacing effect	-0.9244543143975648	na
BALB	no motif/spacing effect	0.06922737379323829	na
BALB	no motif/spacing effect	-0.2219096724475902	na
BALB	no motif/spacing effect	-0.29524189938377354	na
BALB	no motif/spacing effect	1.1581676914120602	na
BALB	no motif/spacing effect	0.09925793843774766	na
BALB	no motif/spacing effect	-2.2232165830503146	na
BALB	no motif/spacing effect	-2.023558289480971	na
BALB	no motif/spacing effect	-0.2792143328892287	na
BALB	no motif/spacing effect	-1.0743145667167129	na
BALB	no motif/spacing effect	-0.7624918174917985	na
BALB	no motif/spacing effect	-0.4126125100450948	na
BALB	no motif/spacing effect	-0.8091381441084105	na
BALB	no motif/spacing effect	-0.8884569239787172	na
BALB	no motif/spacing effect	-1.4539969391893495	na
BALB	no motif/spacing effect	-1.5861464934350358	na
BALB	no motif/spacing effect	-0.7913278826158949	na
BALB	no motif/spacing effect	-0.7736097190369984	na
BALB	no motif/spacing effect	-0.11997545891867123	na
BALB	no motif/spacing effect	1.1588567644861123	na
BALB	no motif/spacing effect	-3.08197730216661	na
BALB	no motif/spacing effect	-1.906454538467254	na
BALB	no motif/spacing effect	-0.4922503391558175	na
BALB	no motif/spacing effect	-0.8701023398353156	na
BALB	no motif/spacing effect	-0.5148550718358997	na
BALB	no motif/spacing effect	0.15878393477049713	na
BALB	no motif/spacing effect	-1.0946625005009905	na
BALB	no motif/spacing effect	-0.8511424044393934	na
BALB	no motif/spacing effect	-0.251824936005383	na
BALB	no motif/spacing effect	-0.4846852722626842	na
BALB	no motif/spacing effect	0.270117502163715	na
BALB	no motif/spacing effect	-0.3915900012734639	na
BALB	no motif/spacing effect	-0.14527181968028957	na
BALB	no motif/spacing effect	1.0632283899217714	na
BALB	no motif/spacing effect	-0.14767807870973115	na
BALB	no motif/spacing effect	-1.5221211875053298	na
BALB	no motif/spacing effect	0.8599695482210259	na
BALB	no motif/spacing effect	-0.8521448107023657	na
BALB	no motif/spacing effect	-0.06317480473820858	na
BALB	no motif/spacing effect	-1.1857880764535187	na
BALB	no motif/spacing effect	-1.103792832060253	na
BALB	no motif/spacing effect	-0.573765931518408	na
BALB	no motif/spacing effect	-1.1613027871001087	na
BALB	no motif/spacing effect	-0.6426191848423253	na
BALB	no motif/spacing effect	-0.39144125112853345	na
BALB	no motif/spacing effect	0.8178219211086728	na
BALB	no motif/spacing effect	2.4993826839061133	na
BALB	no motif/spacing effect	0.7863653225993517	na
BALB	no motif/spacing effect	-1.6357195528501887	na
BALB	no motif/spacing effect	-0.31970685497068363	na
BALB	no motif/spacing effect	-0.9178363382166372	na
BALB	no motif/spacing effect	-0.9023033261128668	na
BALB	no motif/spacing effect	2.065227622775619	na
BALB	no motif/spacing effect	-0.4489009511451278	na
BALB	no motif/spacing effect	0.700269759368334	na
BALB	no motif/spacing effect	0.17057913658881185	na
BALB	no motif/spacing effect	0.10913315544824487	na
BALB	no motif/spacing effect	-0.7041152443914171	na
BALB	no motif/spacing effect	1.6749352314847212	na
BALB	no motif/spacing effect	-0.9852784942932344	na
BALB	no motif/spacing effect	0.07533168568172943	na
BALB	no motif/spacing effect	-0.3063708139758008	na
BALB	no motif/spacing effect	0.11690917291306757	na
BALB	no motif/spacing effect	-0.8874361674711286	na
BALB	no motif/spacing effect	-0.4963735216875511	na
BALB	no motif/spacing effect	-0.34264791796647387	na
BALB	no motif/spacing effect	-1.2168457621755193	na
BALB	no motif/spacing effect	-0.1649644735806266	na
BALB	no motif/spacing effect	-0.9521862974892734	na
BALB	no motif/spacing effect	-0.7549038474822121	na
BALB	no motif/spacing effect	-0.47285373617907034	na
BALB	no motif/spacing effect	-0.8986553042172112	na
BALB	no motif/spacing effect	-0.9823499751022746	na
BALB	no motif/spacing effect	0.3192019432736313	na
BALB	no motif/spacing effect	1.1375035237499347	na
BALB	no motif/spacing effect	-0.9990965960226381	na
BALB	no motif/spacing effect	0.8231222379159207	na
BALB	no motif/spacing effect	1.1876461893534964	na
BALB	no motif/spacing effect	1.1110672454648958	na
BALB	no motif/spacing effect	-1.0169124884616911	na
BALB	no motif/spacing effect	0.09251213878953823	na
BALB	no motif/spacing effect	0.0010296034780914454	na
BALB	no motif/spacing effect	0.48291122925145924	na
BALB	no motif/spacing effect	-0.093260876389194	na
BALB	no motif/spacing effect	-0.5916173069957162	na
BALB	no motif/spacing effect	-0.7997989476092462	na
BALB	no motif/spacing effect	-0.5375770988461523	na
BALB	no motif/spacing effect	0.24600956511728267	na
BALB	no motif/spacing effect	-0.2308340477741413	na
BALB	no motif/spacing effect	-0.5565549716766087	na
BALB	no motif/spacing effect	-1.0641174968566682	na
BALB	no motif/spacing effect	-2.2730184944064162	na
BALB	no motif/spacing effect	-1.152072021327383	na
BALB	no motif/spacing effect	-1.3831036027213894	na
BALB	no motif/spacing effect	-0.479894232686358	na
BALB	no motif/spacing effect	-0.7660994459006893	na
BALB	no motif/spacing effect	-0.09455498611275548	na
BALB	no motif/spacing effect	-1.8123342016634636	na
BALB	no motif/spacing effect	-0.32790063458792673	na
BALB	no motif/spacing effect	-0.01623035864969502	na
BALB	no motif/spacing effect	-0.952184685979002	na
BALB	no motif/spacing effect	-0.29571781932308205	na
BALB	no motif/spacing effect	-1.0662451138155067	na
BALB	no motif/spacing effect	2.2234225499349374	na
BALB	no motif/spacing effect	1.5094210023167092	na
BALB	no motif/spacing effect	-0.1584374657132459	na
BALB	no motif/spacing effect	1.153989230997683	na
BALB	no motif/spacing effect	0.23594434160867195	na
BALB	no motif/spacing effect	-0.11083468873096347	na
BALB	no motif/spacing effect	-0.2193649989989579	na
BALB	no motif/spacing effect	-0.4462985784056368	na
BALB	no motif/spacing effect	-0.28482947081356147	na
BALB	no motif/spacing effect	0.7302620538701299	na
BALB	no motif/spacing effect	-1.0604316464803203	na
BALB	no motif/spacing effect	-1.6951930943209872	na
BALB	no motif/spacing effect	0.4649627246105261	na
BALB	no motif/spacing effect	-0.7947513628410885	na
BALB	no motif/spacing effect	0.9143100748863233	na
BALB	no motif/spacing effect	0.0	na
BALB	no motif/spacing effect	-0.7245457544816709	na
BALB	no motif/spacing effect	-0.44506701401536564	na
BALB	no motif/spacing effect	0.04703207897045125	na
BALB	no motif/spacing effect	1.3633421934202041	na
BALB	no motif/spacing effect	1.3653904639604568	na
BALB	no motif/spacing effect	-0.5048689095079095	na
BALB	no motif/spacing effect	0.1450576505997745	na
BALB	no motif/spacing effect	-0.9762012319434135	na
BALB	no motif/spacing effect	1.2147388487930124	na
BALB	no motif/spacing effect	0.3489871071117836	na
BALB	no motif/spacing effect	0.2983337899919061	na
BALB	no motif/spacing effect	-0.9987507885101161	na
BALB	no motif/spacing effect	-0.40467142506352793	na
BALB	no motif/spacing effect	0.23114932252180953	na
BALB	no motif/spacing effect	-0.6239730281331477	na
BALB	no motif/spacing effect	-0.39715297289461216	na
BALB	no motif/spacing effect	-1.0277488023665553	na
BALB	no motif/spacing effect	0.012002523811519783	na
BALB	no motif/spacing effect	-0.8745463107271432	na
BALB	no motif/spacing effect	0.30341029163027855	na
BALB	no motif/spacing effect	-0.28609946582468027	na
BALB	no motif/spacing effect	-0.1754250546336671	na
BALB	no motif/spacing effect	-0.447352233793608	na
BALB	no motif/spacing effect	-0.6822322413811284	na
BALB	no motif/spacing effect	-0.7386756615834953	na
BALB	no motif/spacing effect	0.4512640699930617	na
BALB	no motif/spacing effect	1.2544979176595863	na
BALB	no motif/spacing effect	0.9267107816028073	na
BALB	no motif/spacing effect	-0.6107255967862377	na
BALB	no motif/spacing effect	-0.14368547849972657	na
BALB	no motif/spacing effect	0.0010903351375928239	na
BALB	no motif/spacing effect	-0.6443410478000873	na
BALB	no motif/spacing effect	0.10798383521081423	na
BALB	no motif/spacing effect	-0.8449712190640164	na
BALB	no motif/spacing effect	1.1950519011672887	na
BALB	no motif/spacing effect	-0.21217909703745352	na
BALB	no motif/spacing effect	-0.9743976644439005	na
BALB	no motif/spacing effect	0.12034676261985044	na
BALB	no motif/spacing effect	-0.5288577958045506	na
BALB	no motif/spacing effect	-0.18088493184301502	na
BALB	no motif/spacing effect	0.723785241699332	na
BALB	no motif/spacing effect	0.8334767487039514	na
BALB	no motif/spacing effect	-0.673052098752831	na
BALB	no motif/spacing effect	0.39162331882460233	na
BALB	no motif/spacing effect	-0.6357782947441333	na
BALB	no motif/spacing effect	-0.9207516157638462	na
BALB	no motif/spacing effect	-0.6167289739286401	na
BALB	no motif/spacing effect	0.4382928515791469	na
BALB	no motif/spacing effect	-1.2763088989040217	na
BALB	no motif/spacing effect	-1.234162215453222	na
BALB	no motif/spacing effect	0.0	na
BALB	no motif/spacing effect	0.0474279163458311	na
BALB	no motif/spacing effect	-0.9025776027374364	na
BALB	no motif/spacing effect	-0.9964029344556042	na
BALB	no motif/spacing effect	-1.7614163607500037	na
BALB	no motif/spacing effect	-0.563049834058063	na
BALB	no motif/spacing effect	-0.48091333262429536	na
BALB	no motif/spacing effect	-0.6344383358326899	na
BALB	no motif/spacing effect	-2.124165908529533	na
BALB	no motif/spacing effect	-0.06390014267308608	na
BALB	no motif/spacing effect	-1.039676192661382	na
BALB	no motif/spacing effect	-0.022164429359389892	na
BALB	no motif/spacing effect	-0.4971084281425897	na
BALB	no motif/spacing effect	-0.7213427546759901	na
BALB	no motif/spacing effect	0.2899119824802838	na
BALB	no motif/spacing effect	0.13202050080971084	na
BALB	no motif/spacing effect	0.251879599778877	na
BALB	no motif/spacing effect	-0.012421635492982475	na
BALB	no motif/spacing effect	-0.24931679608575763	na
BALB	no motif/spacing effect	-0.5560077875420713	na
BALB	no motif/spacing effect	-0.3864820725903799	na
BALB	no motif/spacing effect	-1.423543980532246	na
BALB	no motif/spacing effect	-0.24229340107973218	na
BALB	no motif/spacing effect	-0.6741518283895225	na
BALB	no motif/spacing effect	-0.6177688985540772	na
BALB	no motif/spacing effect	-0.020939337692363003	na
BALB	no motif/spacing effect	-0.8040907103909589	na
BALB	no motif/spacing effect	-0.12998885563524443	na
BALB	no motif/spacing effect	-0.012981951568376005	na
BALB	no motif/spacing effect	-1.0054193827618905	na
BALB	no motif/spacing effect	-0.8398578720059682	na
BALB	no motif/spacing effect	-0.47335894923467947	na
BALB	no motif/spacing effect	-0.9228162908816682	na
BALB	no motif/spacing effect	-0.5104797351014705	na
BALB	no motif/spacing effect	-0.6947955799849401	na
BALB	no motif/spacing effect	-0.350221046356165	na
BALB	no motif/spacing effect	0.9068095658103625	na
BALB	no motif/spacing effect	-0.17185768794768652	na
BALB	no motif/spacing effect	-0.5768098880539987	na
BALB	no motif/spacing effect	0.020637920688447497	na
BALB	no motif/spacing effect	2.2490382757524445	na
BALB	no motif/spacing effect	0.2927349396354959	na
BALB	no motif/spacing effect	-0.39141005235950566	na
BALB	no motif/spacing effect	0.22358536823675745	na
BALB	no motif/spacing effect	-1.4558693795342847	na
BALB	no motif/spacing effect	0.009223360817415482	na
BALB	no motif/spacing effect	-0.17958654568656485	na
BALB	no motif/spacing effect	-0.3331511241994427	na
BALB	no motif/spacing effect	-1.1228567477855336	na
BALB	no motif/spacing effect	2.7884251935227526	na
BALB	no motif/spacing effect	0.050472045947535626	na
BALB	no motif/spacing effect	-1.6752859307508388	na
BALB	no motif/spacing effect	0.7052567344388678	na
BALB	no motif/spacing effect	-0.5005638319234231	na
BALB	no motif/spacing effect	-0.11154307602128277	na
BALB	no motif/spacing effect	-1.3054399720987933	na
BALB	no motif/spacing effect	-0.38707772066985413	na
BALB	no motif/spacing effect	-1.3175966031986217	na
BALB	no motif/spacing effect	-0.6595237531114115	na
BALB	no motif/spacing effect	-0.4858276890656521	na
BALB	no motif/spacing effect	-0.3949617225141848	na
BALB	no motif/spacing effect	0.024205881839644228	na
BALB	no motif/spacing effect	-1.979936382152529	na
BALB	no motif/spacing effect	-0.5417779619313121	na
BALB	no motif/spacing effect	-0.16065375535145243	na
BALB	no motif/spacing effect	-0.14584293274550042	na
BALB	no motif/spacing effect	-1.2079699536930777	na
BALB	no motif/spacing effect	1.4569312799856493	na
BALB	no motif/spacing effect	-0.9406639312296141	na
BALB	no motif/spacing effect	1.0919921528825116	na
BALB	no motif/spacing effect	-1.725151686910987	na
BALB	no motif/spacing effect	-0.3240880896747873	na
BALB	no motif/spacing effect	-0.2191125510698444	na
BALB	no motif/spacing effect	-0.9252834704628459	na
BALB	no motif/spacing effect	0.0	na
BALB	no motif/spacing effect	-0.8058517587248617	na
BALB	no motif/spacing effect	-0.4912031118298694	na
BALB	no motif/spacing effect	-0.908719493010711	na
BALB	no motif/spacing effect	-0.5593342116899569	na
BALB	no motif/spacing effect	-0.06051508527243232	na
BALB	no motif/spacing effect	1.035857806996788	na
BALB	no motif/spacing effect	0.028540892041807986	na
BALB	no motif/spacing effect	-1.7375605725401044	na
BALB	no motif/spacing effect	-0.85942660489685	na
BALB	no motif/spacing effect	0.026247449995408623	na
BALB	no motif/spacing effect	-0.4758803542645218	na
BALB	no motif/spacing effect	2.7486183123270598	na
BALB	no motif/spacing effect	-0.22365049426630357	na
BALB	no motif/spacing effect	-0.20655098004567396	na
BALB	no motif/spacing effect	1.0264308294038385	na
BALB	no motif/spacing effect	-0.23493358509411033	na
BALB	no motif/spacing effect	0.279136432505509	na
BALB	no motif/spacing effect	0.9552536171699169	na
BALB	no motif/spacing effect	-0.7071267907186418	na
BALB	no motif/spacing effect	-0.49814142482493295	na
BALB	no motif/spacing effect	0.41591907281124874	na
BALB	no motif/spacing effect	-0.49213142082960015	na
BALB	no motif/spacing effect	-0.08220935886410619	na
BALB	no motif/spacing effect	0.7548875021634687	na
BALB	no motif/spacing effect	-1.093171417116496	na
BALB	no motif/spacing effect	-0.483727205876999	na
BALB	no motif/spacing effect	-1.0452647337357819	na
BALB	no motif/spacing effect	-0.16034743778175642	na
BALB	no motif/spacing effect	-0.8441976070085353	na
BALB	no motif/spacing effect	-1.2827366617830789	na
BALB	no motif/spacing effect	-0.3515711746396919	na
BALB	no motif/spacing effect	-0.9764842995851177	na
BALB	no motif/spacing effect	-1.670649930264342	na
BALB	no motif/spacing effect	-1.081788304191536	na
BALB	no motif/spacing effect	-1.6906570212938634	na
BALB	no motif/spacing effect	0.7605953405511058	na
BALB	no motif/spacing effect	-1.8240054304999092	na
BALB	no motif/spacing effect	-1.376773015347779	na
BALB	no motif/spacing effect	0.3045110418099528	na
BALB	no motif/spacing effect	-0.458791700666775	na
BALB	no motif/spacing effect	-0.3917898361197176	na
BALB	no motif/spacing effect	-0.9033851532070973	na
BALB	no motif/spacing effect	-0.18143474983608954	na
BALB	no motif/spacing effect	-2.1740149554191914	na
BALB	no motif/spacing effect	0.07332050598912865	na
BALB	no motif/spacing effect	-1.3029150405136152	na
BALB	no motif/spacing effect	-1.134899772029394	na
BALB	no motif/spacing effect	-0.7377974783125882	na
BALB	no motif/spacing effect	0.45558559193788994	na
BALB	no motif/spacing effect	-0.5897123957546491	na
BALB	no motif/spacing effect	-1.3576810805896544	na
BALB	no motif/spacing effect	-1.4697238044294627	na
BALB	no motif/spacing effect	0.5963348995179318	na
BALB	no motif/spacing effect	-0.16273914304472115	na
BALB	no motif/spacing effect	-0.46721802868075635	na
BALB	no motif/spacing effect	-1.8952177718925425	na
BALB	no motif/spacing effect	-0.29738309026906684	na
BALB	no motif/spacing effect	0.27136064789889414	na
BALB	no motif/spacing effect	-0.8926864999301589	na
BALB	no motif/spacing effect	-0.38614178653872155	na
BALB	no motif/spacing effect	-1.03184886603934	na
BALB	no motif/spacing effect	-0.8463768108867882	na
BALB	no motif/spacing effect	-1.6601527318101033	na
BALB	no motif/spacing effect	0.0016094523352485623	na
BALB	no motif/spacing effect	-0.23089623508347223	na
BALB	no motif/spacing effect	-0.6725045782774819	na
BALB	no motif/spacing effect	1.2578203394742191	na
BALB	no motif/spacing effect	-0.4628392211747254	na
BALB	no motif/spacing effect	0.06835456732025147	na
BALB	no motif/spacing effect	-0.10716545457470872	na
BALB	no motif/spacing effect	0.5310565859692069	na
BALB	no motif/spacing effect	-1.1238428947614674	na
BALB	no motif/spacing effect	0.745408831899764	na
BALB	no motif/spacing effect	0.014080349551704785	na
BALB	no motif/spacing effect	-0.8299032537946296	na
BALB	no motif/spacing effect	-0.7909130070603938	na
BALB	no motif/spacing effect	-0.6797161934107345	na
BALB	no motif/spacing effect	-0.7278939713975374	na
BALB	no motif/spacing effect	-1.1982650782667665	na
BALB	no motif/spacing effect	-0.7548875021634691	na
BALB	no motif/spacing effect	-0.8583288420348358	na
BALB	no motif/spacing effect	0.13355990511492966	na
BALB	no motif/spacing effect	-0.47133048388410614	na
BALB	no motif/spacing effect	-0.5108577573307698	na
BALB	no motif/spacing effect	0.7729953960779565	na
BALB	no motif/spacing effect	-0.37318872076729637	na
BALB	no motif/spacing effect	-0.289433681057111	na
BALB	no motif/spacing effect	-0.004793542036170884	na
BALB	no motif/spacing effect	-0.295201946597933	na
BALB	no motif/spacing effect	0.189571053447688	na
BALB	no motif/spacing effect	-1.106565547149561	na
BALB	no motif/spacing effect	-0.48385458773178414	na
BALB	no motif/spacing effect	-0.2774355988943844	na
BALB	no motif/spacing effect	-1.1510996664133195	na
BALB	no motif/spacing effect	0.16578127743124504	na
BALB	no motif/spacing effect	-1.2266559014867164	na
BALB	no motif/spacing effect	-0.5557596520359072	na
BALB	no motif/spacing effect	-0.4993986641462893	na
BALB	no motif/spacing effect	-0.6720997265269135	na
BALB	no motif/spacing effect	-0.7582133278702452	na
BALB	no motif/spacing effect	0.03889157050888725	na
BALB	no motif/spacing effect	-0.3288539611883978	na
BALB	no motif/spacing effect	0.01706018031788581	na
BALB	no motif/spacing effect	-0.9978987995383592	na
BALB	no motif/spacing effect	-1.3907160021701879	na
BALB	no motif/spacing effect	-1.4932411241557082	na
BALB	no motif/spacing effect	0.27867489693347847	na
BALB	no motif/spacing effect	-0.6341985773566643	na
BALB	no motif/spacing effect	-0.5275525793166409	na
BALB	no motif/spacing effect	0.32599836349809586	na
BALB	no motif/spacing effect	3.220758144301609	na
BALB	no motif/spacing effect	-0.04114235837150115	na
BALB	no motif/spacing effect	1.3950627995175777	na
BALB	no motif/spacing effect	-1.016036687268259	na
BALB	no motif/spacing effect	-0.9706239136359978	na
BALB	no motif/spacing effect	-0.6817008480172371	na
BALB	no motif/spacing effect	0.6474615093507214	na
BALB	no motif/spacing effect	-0.3456550147062991	na
BALB	no motif/spacing effect	-0.008445068256256683	na
BALB	no motif/spacing effect	-1.0267491991641995	na
BALB	no motif/spacing effect	-0.5428133556850314	na
BALB	no motif/spacing effect	-3.3064181839688005	na
BALB	no motif/spacing effect	-0.3661827607818289	na
BALB	no motif/spacing effect	0.2042150875123374	na
BALB	no motif/spacing effect	-0.4891759847043886	na
BALB	no motif/spacing effect	-0.7810019466186997	na
BALB	no motif/spacing effect	-0.5140502510476486	na
BALB	no motif/spacing effect	-0.6238785320996802	na
BALB	no motif/spacing effect	-0.7180249520646536	na
BALB	no motif/spacing effect	0.1826432826622737	na
BALB	no motif/spacing effect	-0.9626907643026668	na
BALB	no motif/spacing effect	-0.4533656179379433	na
BALB	no motif/spacing effect	-0.4531784226917468	na
BALB	no motif/spacing effect	0.6613280273000912	na
BALB	no motif/spacing effect	-0.4271408968285364	na
BALB	no motif/spacing effect	-0.5391214902165649	na
BALB	no motif/spacing effect	-0.4634830650203625	na
BALB	no motif/spacing effect	0.057722496389054356	na
BALB	no motif/spacing effect	-1.1314582342178954	na
BALB	no motif/spacing effect	-0.023917550810593546	na
BALB	no motif/spacing effect	-0.9142831902941699	na
BALB	no motif/spacing effect	0.1209149507590288	na
BALB	no motif/spacing effect	-0.16367428430870312	na
BALB	no motif/spacing effect	-0.9765488494595429	na
BALB	no motif/spacing effect	-0.03718602206784727	na
BALB	no motif/spacing effect	-0.6871259142968844	na
BALB	no motif/spacing effect	1.5386237860542864	na
BALB	no motif/spacing effect	-0.09420454788995336	na
BALB	no motif/spacing effect	3.0314151991184097	na
BALB	no motif/spacing effect	-0.7333814525250553	na
BALB	no motif/spacing effect	-1.8744691179161412	na
BALB	no motif/spacing effect	-0.8228088593846632	na
BALB	no motif/spacing effect	-0.03651446225337551	na
BALB	no motif/spacing effect	0.6269927521410746	na
BALB	no motif/spacing effect	0.4215645577996008	na
BALB	no motif/spacing effect	-0.6584944830574058	na
BALB	no motif/spacing effect	0.09922927894543765	na
BALB	no motif/spacing effect	-0.7302120751896428	na
BALB	no motif/spacing effect	-0.8536591129908877	na
BALB	no motif/spacing effect	-0.39671110260982	na
BALB	no motif/spacing effect	-0.3476306168705614	na
BALB	no motif/spacing effect	-1.833378549959221	na
BALB	no motif/spacing effect	-1.1177319092832372	na
BALB	no motif/spacing effect	0.04626454093181387	na
BALB	no motif/spacing effect	0.03840453911265129	na
BALB	no motif/spacing effect	0.11999482709136089	na
BALB	no motif/spacing effect	0.31365424010110043	na
BALB	no motif/spacing effect	-0.6324564798046852	na
BALB	no motif/spacing effect	-0.8573231625693225	na
BALB	no motif/spacing effect	-1.2119615953008873	na
BALB	no motif/spacing effect	-1.0000957583327637	na
BALB	no motif/spacing effect	-1.3699229862754643	na
BALB	no motif/spacing effect	-0.2680731934450984	na
BALB	no motif/spacing effect	1.311971567854939	na
BALB	no motif/spacing effect	-0.2727219605876119	na
BALB	no motif/spacing effect	-1.2685240802012454	na
BALB	no motif/spacing effect	1.1044595521901996	na
BALB	no motif/spacing effect	-0.580256151454841	na
BALB	no motif/spacing effect	-0.07062446684406343	na
BALB	no motif/spacing effect	-0.5509761564794082	na
BALB	no motif/spacing effect	-0.37650360190047216	na
BALB	no motif/spacing effect	-1.2020207888548566	na
BALB	no motif/spacing effect	0.7571263865091233	na
[truncated: 74,553 more rows]
