# Supplementary material for: Systematic analysis of naturally occurring insertions and deletions that alter transcription factor spacing identifies tolerant and sensitive transcription factor pairs
Source: eLife. 2022 Jan 20;11:e70878. doi: 10.7554/eLife.70878 (PMC8809895; doi:10.7554/eLife.70878)
Supplement: Figure 3—source data 3. [file elife-70878-fig3-data3.csv]

strain	group	Log2 GRO fold change	Change of PWM score or spacing
BALB	mutated PU.1 motif	-0.05465026398493933	3.3483290000000014
BALB	mutated PU.1 motif	0.39166180129922434	-3.639792
BALB	mutated PU.1 motif	-2.0268416122186412	-4.719585999999998
BALB	mutated PU.1 motif	-0.5945485495503542	-5.4834369999999995
BALB	mutated PU.1 motif	-0.5313814605163121	-6.5480979999999995
BALB	mutated PU.1 motif	-0.3558047912974107	-3.0432159999999975
BALB	mutated PU.1 motif	0.025535092107137447	-6.658211400000002
BALB	mutated PU.1 motif	1.8797057662822882	6.658213
BALB	mutated PU.1 motif	-0.315641832039931	3.7944226
BALB	mutated PU.1 motif	0.0	-2.4774650000000005
BALB	mutated PU.1 motif	0.13427073164801806	3.4529404999999986
BALB	mutated PU.1 motif	0.8468001457721893	3.6397924999999995
BALB	mutated PU.1 motif	0.9927684307689242	2.3197829999999993
BALB	mutated PU.1 motif	0.5058909297299572	2.1461360000000003
BALB	mutated PU.1 motif	0.0	2.057546500000001
BALB	mutated PU.1 motif	0.08365792904690939	-6.020700999999997
BALB	mutated PU.1 motif	0.18903382439001712	-3.6212190000000017
BALB	mutated PU.1 motif	-1.0582146139452955	-3.1658299999999997
BALB	mutated PU.1 motif	-0.3365634412557592	-3.7140379999999986
BALB	mutated PU.1 motif	-0.1452834956386817	-3.5432360000000003
BALB	mutated PU.1 motif	0.11208092687002802	3.8131717000000016
BALB	mutated PU.1 motif	-0.036836768180371404	3.6805290000000017
BALB	mutated PU.1 motif	0.5058909297299572	-8.3822802
BALB	mutated PU.1 motif	-0.22650852980867975	-3.452940999999999
BALB	mutated PU.1 motif	-0.47089073401236126	2.3176184000000006
BALB	mutated PU.1 motif	-0.052137623335175576	-2.1069770000000005
BALB	mutated PU.1 motif	0.18903382439001712	6.658211999999997
BALB	mutated PU.1 motif	-2.156956868814013	2.1178880000000007
BALB	mutated PU.1 motif	0.8875252707415875	6.548099
BALB	mutated PU.1 motif	-0.8875252707415875	-4.411154299999999
BALB	mutated PU.1 motif	-0.9418970454364315	-2.4774645
BALB	mutated PU.1 motif	0.5058909297299572	2.2419469999999997
BALB	mutated PU.1 motif	-3.22893526720322	-6.947585699999999
BALB	mutated PU.1 motif	-1.1537011991945496	3.6397924999999987
BALB	mutated PU.1 motif	-0.4192862361209735	-6.546352999999998
BALB	mutated PU.1 motif	-0.38027208111816746	2.144004
BALB	mutated PU.1 motif	0.3261775678887202	2.8743039999999986
BALB	mutated PU.1 motif	0.5474877953024934	3.639792
BALB	mutated PU.1 motif	0.0	5.276900000000001
BALB	mutated PU.1 motif	0.0	-3.348328000000002
BALB	mutated PU.1 motif	-0.5186124522977709	-3.3483300000000007
BALB	mutated PU.1 motif	0.6016264225766443	3.639791599999999
BALB	mutated PU.1 motif	0.6492900758253528	2.756804700000001
BALB	mutated PU.1 motif	-0.22650852980867975	-3.4529414999999988
BALB	mutated PU.1 motif	-0.8875252707415875	-2.4059363000000005
BALB	mutated PU.1 motif	0.18903382439001712	-5.137747999999998
BALB	mutated PU.1 motif	-0.23387191822216646	6.548099000000001
BALB	mutated PU.1 motif	0.3166723694358673	-3.461973999999998
BALB	mutated PU.1 motif	0.0	3.680529
BALB	mutated PU.1 motif	-0.6704318429105058	-4.374306600000001
BALB	mutated PU.1 motif	-0.4703313891496985	3.348329999999999
BALB	mutated PU.1 motif	0.0	-4.723737000000002
BALB	mutated PU.1 motif	0.0	6.6582116
BALB	mutated PU.1 motif	1.597240830499593	4.478171000000001
BALB	mutated PU.1 motif	0.21931302840447586	4.671308999999999
BALB	mutated PU.1 motif	0.03273678641199984	4.802497000000001
BALB	mutated PU.1 motif	-0.06608919045777245	-2.6221460000000008
BALB	mutated PU.1 motif	-2.0973249068624464	-3.639792
BALB	mutated PU.1 motif	-0.13364088411753627	-3.5799319999999986
BALB	mutated PU.1 motif	-2.0548240247445215	-3.639792
BALB	mutated PU.1 motif	-0.22650852980867975	-3.680529
BALB	mutated PU.1 motif	0.18271911365836502	6.447458
BALB	mutated PU.1 motif	0.0	-2.019154000000002
BALB	mutated PU.1 motif	-1.4382928515791469	-6.658210000000002
BALB	mutated PU.1 motif	-0.22512566189042582	-4.4018926
BALB	mutated PU.1 motif	0.32476339558550005	-3.1723800000000004
BALB	mutated PU.1 motif	-1.4714576428642538	-2.8100933999999986
BALB	mutated PU.1 motif	-0.48137999410753984	2.9468330000000007
BALB	mutated PU.1 motif	1.2193130284044758	3.452942
BALB	mutated PU.1 motif	0.35614381022527536	3.9654370000000005
BALB	mutated PU.1 motif	-0.4222330006830478	-3.6805290000000017
BALB	mutated PU.1 motif	-0.7685168425926951	-3.452941000000001
BALB	mutated C/EBPβ motif	-1.962781796500563	4.9726624
BALB	mutated C/EBPβ motif	2.881179339505694	3.5333395999999997
BALB	mutated C/EBPβ motif	-2.0268416122186412	-2.6088319999999996
BALB	mutated C/EBPβ motif	0.35614381022527536	3.3673162000000003
BALB	mutated C/EBPβ motif	-1.01435529297707	-9.2291512
BALB	mutated C/EBPβ motif	0.6744845969048829	-2.6877150000000003
BALB	mutated C/EBPβ motif	-0.387954261251076	-2.6088316999999996
BALB	mutated C/EBPβ motif	-0.056413308905266524	-6.3597413
BALB	mutated C/EBPβ motif	-1.6484513267065442	-6.173249
BALB	mutated C/EBPβ motif	-0.6449842221913733	-3.4783269999999993
BALB	mutated C/EBPβ motif	-0.3923174227787603	6.207037639999999
BALB	mutated C/EBPβ motif	-0.3573898402790281	-6.3597409
BALB	mutated C/EBPβ motif	0.35614381022527536	-6.546658549999999
BALB	mutated C/EBPβ motif	-1.9943534368588576	2.608831500000001
BALB	mutated C/EBPβ motif	0.03631369938808371	-3.2785914000000003
BALB	mutated C/EBPβ motif	-0.9340279675189924	-5.980286800000001
BALB	mutated C/EBPβ motif	-1.1197392442740957	-6.190177500000001
BALB	mutated C/EBPβ motif	1.7765416247510402	6.546658559999999
BALB	mutated C/EBPβ motif	0.9927684307689242	2.3638303999999994
BALB	mutated C/EBPβ motif	1.0135748574658066	7.5850017
BALB	mutated C/EBPβ motif	-0.5735789115156993	-4.1944405
BALB	mutated C/EBPβ motif	0.203328159709526	-5.171652300000001
BALB	mutated C/EBPβ motif	-0.5438090129243949	2.2161077999999996
BALB	mutated C/EBPβ motif	-0.6491849436754829	-2.2338369999999994
BALB	mutated C/EBPβ motif	-0.0774787526777172	-3.2218736000000003
BALB	mutated C/EBPβ motif	-0.40413207002643947	-4.760397
BALB	mutated C/EBPβ motif	-0.10373752712316087	3.2218730000000004
BALB	mutated C/EBPβ motif	0.755948697533779	2.6088317000000014
BALB	mutated C/EBPβ motif	-0.009242152304848705	3.6435873999999995
BALB	mutated C/EBPβ motif	-2.156956868814013	-6.4947766
BALB	mutated C/EBPβ motif	-0.3219280948873622	2.2493109999999987
BALB	mutated C/EBPβ motif	-0.07691182292601795	3.270728
BALB	mutated C/EBPβ motif	-0.6575807219783929	3.4783275000000002
BALB	mutated C/EBPβ motif	0.6754516539882669	-2.6088322999999995
BALB	mutated C/EBPβ motif	-0.6432076417571091	6.494776700000001
BALB	mutated C/EBPβ motif	-0.9886846867721657	-3.270726
BALB	mutated C/EBPβ motif	0.5058909297299572	5.3170098
BALB	mutated C/EBPβ motif	-2.1313774209530933	-2.4920790000000004
BALB	mutated C/EBPβ motif	-1.1251793053693402	2.6088310000000003
BALB	mutated C/EBPβ motif	-0.38027208111816746	-3.270726500000001
BALB	mutated C/EBPβ motif	-0.4997553873182592	-3.2218739999999997
BALB	mutated C/EBPβ motif	0.4629719763425457	5.8454045
BALB	mutated C/EBPβ motif	-2.1313774209530933	2.1253249999999992
BALB	mutated C/EBPβ motif	-1.2230861915065327	3.2218735999999986
BALB	mutated C/EBPβ motif	-0.8875252707415875	-5.4344149999999996
BALB	mutated C/EBPβ motif	-1.0	6.3597415
BALB	mutated C/EBPβ motif	-1.0578809160804998	-6.4734184
BALB	mutated C/EBPβ motif	0.6415460290875237	6.5004499
BALB	mutated C/EBPβ motif	0.08365792904690939	-3.9316824000000006
BALB	mutated C/EBPβ motif	-1.2786051117225883	-3.221873
BALB	mutated C/EBPβ motif	0.0	-8.0729638
BALB	mutated C/EBPβ motif	-0.6013044562674841	-3.2218740000000006
BALB	mutated C/EBPβ motif	-0.30472321844698325	-3.0764839999999993
BALB	mutated C/EBPβ motif	-2.131856960608793	-6.494776999999999
BALB	mutated C/EBPβ motif	1.495916889108126	2.2449390000000005
BALB	mutated C/EBPβ motif	-0.6704318429105058	-4.029643
BALB	mutated C/EBPβ motif	0.0	2.1053504
BALB	mutated C/EBPβ motif	-0.18004504116276188	3.221873000000002
BALB	mutated C/EBPβ motif	-1.6690559406285086	-6.494777
BALB	mutated C/EBPβ motif	0.10581412006921598	3.0508294000000014
BALB	mutated C/EBPβ motif	-0.13816243905752446	2.608831999999998
BALB	mutated C/EBPβ motif	-0.1352856985001165	-4.791602999999999
BALB	mutated C/EBPβ motif	0.3233159690116052	-3.2218729999999987
BALB	mutated C/EBPβ motif	-0.48137999410753984	2.608831000000002
BALB	mutated C/EBPβ motif	0.1296352804165956	5.0012175
BALB	mutated C/EBPβ motif	-0.6415460290875235	-4.703658000000003
BALB	mutated C/EBPβ motif	-2.7206176000787226	-5.1392338
BALB	mutated C/EBPβ motif	-0.23840473932507883	2.435802
BALB	mutated C/EBPβ motif	0.35614381022527536	-2.5206802999999987
BALB	mutated C/EBPβ motif	-0.4182257769098916	2.4678414
BALB	mutated C/EBPβ motif	-0.6853802868283743	-6.494776
BALB	mutated C/EBPβ motif	1.0977600486610628	3.221873499999999
BALB	mutated C/EBPβ motif	-0.2521186283546102	6.4667393
BALB	mutated C/EBPβ motif	0.24603229068942056	3.2218740000000015
BALB	mutated C/EBPβ motif	-0.2108900290829716	3.2218737000000006
BALB	mutated C/EBPβ motif	0.0	2.6088322999999987
BALB	mutated C/EBPβ motif	-0.7484612330040357	-9.098437
BALB	mutated C/EBPβ motif	0.0	-3.0084496
BALB	mutated C/EBPβ motif	-0.6894566685922621	-3.941857500000001
BALB	mutated C/EBPβ motif	-1.148010225013872	-3.799822999999999
BALB	mutated C/EBPβ motif	0.27938239992127745	-2.6088320000000014
BALB	mutated C/EBPβ motif	-0.7655347463629774	2.2239649999999997
BALB	mutated MAGGIE motif	-0.6582114827517946	-8.467648
BALB	mutated MAGGIE motif	0.5825357633266162	2.8869023000000005
BALB	mutated MAGGIE motif	-0.17102727709065402	-3.7560998000000003
BALB	mutated MAGGIE motif	-0.7484612330040357	-4.3792084
BALB	mutated MAGGIE motif	-0.40427106840977367	-4.5539952
BALB	mutated MAGGIE motif	0.5705354300858764	-6.6384478
BALB	mutated MAGGIE motif	0.6610167409329077	2.0455380000000005
BALB	mutated MAGGIE motif	-0.05465026398493933	5.861530999999999
BALB	mutated MAGGIE motif	-0.22650852980867975	-3.0260949999999998
BALB	mutated MAGGIE motif	0.10524316002733669	-5.02135343
BALB	mutated MAGGIE motif	0.39166180129922434	-3.909256000000001
BALB	mutated MAGGIE motif	-0.03747470541866263	6.658211000000001
BALB	mutated MAGGIE motif	2.476149013582231	5.507973
BALB	mutated MAGGIE motif	-1.1096244911744977	-2.220936
BALB	mutated MAGGIE motif	-1.962781796500563	5.574779
BALB	mutated MAGGIE motif	0.0	-4.0346937
BALB	mutated MAGGIE motif	2.881179339505694	-5.7984683
BALB	mutated MAGGIE motif	-0.2331991762930307	3.8255775000000005
BALB	mutated MAGGIE motif	-0.3573617883819469	2.576338
BALB	mutated MAGGIE motif	-1.5260688116675876	6.6582110000000005
BALB	mutated MAGGIE motif	-2.0268416122186412	-5.96705
BALB	mutated MAGGIE motif	0.0	3.424434999999999
BALB	mutated MAGGIE motif	-0.23840473932507883	6.538054
BALB	mutated MAGGIE motif	0.0	-5.537061900000001
BALB	mutated MAGGIE motif	0.8912937405575003	-7.85442617
BALB	mutated MAGGIE motif	0.18903382439001712	-2.8804182999999988
BALB	mutated MAGGIE motif	0.35614381022527536	-5.3786932
BALB	mutated MAGGIE motif	-1.01435529297707	-9.0104149
BALB	mutated MAGGIE motif	0.6744845969048829	3.0856600999999992
BALB	mutated MAGGIE motif	-0.14630139691641286	-3.7095026999999994
BALB	mutated MAGGIE motif	-1.1711556549681763	-3.9341123
BALB	mutated MAGGIE motif	-0.387954261251076	-5.123425
BALB	mutated MAGGIE motif	0.5011941430285585	5.452551
BALB	mutated MAGGIE motif	-0.056413308905266524	-6.557754000000001
BALB	mutated MAGGIE motif	-0.5055863204029256	-7.198354300000001
BALB	mutated MAGGIE motif	0.9282642464010854	-6.65821
BALB	mutated MAGGIE motif	0.11240130032133688	2.7513232000000003
BALB	mutated MAGGIE motif	-2.0840642647884744	-5.348989999999999
BALB	mutated MAGGIE motif	-1.6484513267065442	-6.658211499999999
BALB	mutated MAGGIE motif	0.0	-4.738828499999999
BALB	mutated MAGGIE motif	-0.24257030327407847	6.4393019
BALB	mutated MAGGIE motif	-0.2331991762930307	6.558534999999999
BALB	mutated MAGGIE motif	-0.6449842221913733	-3.5480164999999992
BALB	mutated MAGGIE motif	-0.4282722226065996	5.512724469999999
BALB	mutated MAGGIE motif	-0.4895844526438977	5.7100286
BALB	mutated MAGGIE motif	-0.6304487726654266	-6.273413
BALB	mutated MAGGIE motif	0.5474877953024934	-2.2473335000000008
BALB	mutated MAGGIE motif	-0.3923174227787603	6.1317076
BALB	mutated MAGGIE motif	-1.5430318202552378	-10.308457
BALB	mutated MAGGIE motif	-0.5313814605163121	-6.658211000000002
BALB	mutated MAGGIE motif	-0.3573898402790281	-6.5577548000000006
BALB	mutated MAGGIE motif	-0.15403362867242087	4.4198307
BALB	mutated MAGGIE motif	-0.3558047912974107	-6.379494000000001
BALB	mutated MAGGIE motif	0.048052129406141564	-5.838636800000001
BALB	mutated MAGGIE motif	0.025535092107137447	-4.7878714
BALB	mutated MAGGIE motif	-1.7890541053146602	-3.180698399999999
BALB	mutated MAGGIE motif	0.02106161552782959	-6.658212
BALB	mutated MAGGIE motif	0.823439802310971	6.438197400000001
BALB	mutated MAGGIE motif	-0.5360529002402097	-4.789187000000002
BALB	mutated MAGGIE motif	-0.4261169451593336	-6.589430000000001
BALB	mutated MAGGIE motif	0.16664986940945115	-3.2626264
BALB	mutated MAGGIE motif	-0.9382710102482941	-3.5367295999999993
BALB	mutated MAGGIE motif	-0.757443398379309	-3.363454
BALB	mutated MAGGIE motif	0.35614381022527536	-6.55775453
BALB	mutated MAGGIE motif	-1.6921659841952041	5.24869215
BALB	mutated MAGGIE motif	-0.47385480272108094	-6.077688800000001
BALB	mutated MAGGIE motif	-0.6704318429105058	-2.0203275000000005
BALB	mutated MAGGIE motif	0.4150374992788439	3.3211330999999995
BALB	mutated MAGGIE motif	0.35614381022527536	-2.4222445000000006
BALB	mutated MAGGIE motif	1.8797057662822882	6.8539669000000005
BALB	mutated MAGGIE motif	-1.9943534368588576	3.025498699999999
BALB	mutated MAGGIE motif	0.0	4.832247999999999
BALB	mutated MAGGIE motif	0.0	4.534568999999999
BALB	mutated MAGGIE motif	-0.4222330006830478	3.6913783
BALB	mutated MAGGIE motif	0.13906403773755183	2.5484514000000007
BALB	mutated MAGGIE motif	-1.5026936405952442	-6.044394100000001
BALB	mutated MAGGIE motif	-0.19430366602416038	-5.348990000000001
BALB	mutated MAGGIE motif	-1.1197392442740957	3.5347197899999996
BALB	mutated MAGGIE motif	0.13427073164801806	2.6955790000000004
BALB	mutated MAGGIE motif	1.1826922975161902	6.1582558
BALB	mutated MAGGIE motif	-0.5494978200663527	3.9253607
BALB	mutated MAGGIE motif	-0.6642965264679738	-5.8593115000000004
BALB	mutated MAGGIE motif	-0.040077439375335144	3.5516474700000003
BALB	mutated MAGGIE motif	0.18903382439001712	-4.196992400000001
BALB	mutated MAGGIE motif	-0.4222330006830478	-4.983704
BALB	mutated MAGGIE motif	0.10561018796059884	-6.4591
BALB	mutated MAGGIE motif	-2.5741325675204045	-5.3031415
BALB	mutated MAGGIE motif	0.00598968418382384	4.3347885
BALB	mutated MAGGIE motif	0.8468001457721893	3.9747462000000002
BALB	mutated MAGGIE motif	0.12973392960401675	6.538055699999999
BALB	mutated MAGGIE motif	-0.1562092044152612	-3.4954494999999994
BALB	mutated MAGGIE motif	-0.5953791166664946	6.403317000000001
BALB	mutated MAGGIE motif	-0.4721580304454607	-6.6582114
BALB	mutated MAGGIE motif	-0.3790656439433837	-3.46681565
BALB	mutated MAGGIE motif	-0.2331991762930307	-2.132179599999998
BALB	mutated MAGGIE motif	0.9927684307689242	3.989890000000001
BALB	mutated MAGGIE motif	0.3841915323260847	4.162468400000001
BALB	mutated MAGGIE motif	-0.3923174227787603	-2.735699200000001
BALB	mutated MAGGIE motif	0.6415460290875237	-5.0787059999999995
BALB	mutated MAGGIE motif	-2.140778655782796	5.600517700000001
BALB	mutated MAGGIE motif	0.5058909297299572	-5.070519400000001
BALB	mutated MAGGIE motif	0.05549511259170403	-5.9302902999999985
BALB	mutated MAGGIE motif	0.03631369938808371	-3.4379142000000007
BALB	mutated MAGGIE motif	-0.16619228256598229	-3.233024
BALB	mutated MAGGIE motif	0.35614381022527536	-2.6863180499999997
BALB	mutated MAGGIE motif	0.018528737403135764	5.2039875
BALB	mutated MAGGIE motif	0.4755512840005742	4.430996000000001
BALB	mutated MAGGIE motif	-0.7224660244710912	-4.676914299999998
BALB	mutated MAGGIE motif	-0.7032824679099174	-2.6933277
BALB	mutated MAGGIE motif	-0.17317572394279956	-2.3169905999999996
BALB	mutated MAGGIE motif	0.08365792904690939	4.5027206
BALB	mutated MAGGIE motif	0.21931302840447586	5.7378727
BALB	mutated MAGGIE motif	0.18903382439001712	-6.724964
BALB	mutated MAGGIE motif	-0.9340279675189924	-6.486668900000001
BALB	mutated MAGGIE motif	-1.1903312121041494	-3.2620397
BALB	mutated MAGGIE motif	-1.1699250014423122	6.398030400000001
BALB	mutated MAGGIE motif	-1.1811697586099352	3.659609
BALB	mutated MAGGIE motif	-1.1197392442740957	-6.658211
BALB	mutated MAGGIE motif	0.1661483106968289	6.658212000000001
BALB	mutated MAGGIE motif	-1.1287698154072525	6.6582114
BALB	mutated MAGGIE motif	1.7765416247510402	6.557754480000001
BALB	mutated MAGGIE motif	-0.21634706357073608	-6.658211400000001
BALB	mutated MAGGIE motif	0.4669477214820299	-5.6648753
BALB	mutated MAGGIE motif	0.9927684307689242	4.0986898
BALB	mutated MAGGIE motif	1.0135748574658066	7.703714
BALB	mutated MAGGIE motif	0.18903382439001712	-6.0443940000000005
BALB	mutated MAGGIE motif	-0.3365634412557592	-4.9494566
BALB	mutated MAGGIE motif	-0.48242637523961207	5.508784100000001
BALB	mutated MAGGIE motif	1.3995732387815596	2.1723532
BALB	mutated MAGGIE motif	-0.5735789115156993	4.7874087
BALB	mutated MAGGIE motif	0.18903382439001712	2.788496
BALB	mutated MAGGIE motif	0.203328159709526	-5.741555
BALB	mutated MAGGIE motif	-0.29567819572953713	2.605727999999999
BALB	mutated MAGGIE motif	0.004249473001357584	5.8174167
BALB	mutated MAGGIE motif	-0.40853593333688876	-2.558449200000001
BALB	mutated MAGGIE motif	0.18903382439001712	-3.271318
BALB	mutated MAGGIE motif	-0.3816343410116303	-6.398030400000001
BALB	mutated MAGGIE motif	-0.888743248898259	-8.427052619999998
BALB	mutated MAGGIE motif	-0.36587144247495873	-5.163279999999999
BALB	mutated MAGGIE motif	0.6610167409329077	6.6384485
BALB	mutated MAGGIE motif	0.9921804955407008	-2.7218001
BALB	mutated MAGGIE motif	-0.5438090129243949	-5.772791999999999
BALB	mutated MAGGIE motif	-0.666780608182731	-6.8857023
BALB	mutated MAGGIE motif	0.23946593469538935	-2.061840299999999
BALB	mutated MAGGIE motif	-0.6491849436754829	-3.3915823975
BALB	mutated MAGGIE motif	-0.036836768180371404	-4.062269199999999
BALB	mutated MAGGIE motif	1.348803800878757	-5.654173400000001
BALB	mutated MAGGIE motif	-1.6870606883398924	-3.5730300000000006
BALB	mutated MAGGIE motif	0.5058909297299572	-5.5896604
BALB	mutated MAGGIE motif	-0.22650852980867975	-4.015895
BALB	mutated MAGGIE motif	-0.5087519341010376	-6.0024764
BALB	mutated MAGGIE motif	-0.0774787526777172	5.212556599999999
BALB	mutated MAGGIE motif	-0.40413207002643947	-4.567303
BALB	mutated MAGGIE motif	0.2929767211912333	-3.8102410000000004
BALB	mutated MAGGIE motif	-0.13443722070215136	-2.073614400000002
BALB	mutated MAGGIE motif	-0.10291831294556664	-4.0514701
BALB	mutated MAGGIE motif	-0.22650852980867975	-2.096528
BALB	mutated MAGGIE motif	-0.10373752712316087	3.3735660000000003
BALB	mutated MAGGIE motif	-0.47089073401236126	-5.0429425
BALB	mutated MAGGIE motif	-0.5945485495503542	6.6384485
BALB	mutated MAGGIE motif	-0.5682493242876214	6.06866152
BALB	mutated MAGGIE motif	-0.6984914463515703	3.7773529999999997
BALB	mutated MAGGIE motif	0.01568937405197346	3.6022776400000005
BALB	mutated MAGGIE motif	-1.2684888359259017	-4.511947299999999
BALB	mutated MAGGIE motif	-0.22650852980867975	-3.6447567000000007
BALB	mutated MAGGIE motif	-0.856635824828822	3.24950197
BALB	mutated MAGGIE motif	0.755948697533779	3.0041597000000015
BALB	mutated MAGGIE motif	0.18903382439001712	-6.007631999999999
BALB	mutated MAGGIE motif	1.8797057662822882	6.658211999999999
BALB	mutated MAGGIE motif	-0.009242152304848705	-3.2817639
BALB	mutated MAGGIE motif	-0.5592453306127814	-4.657859
BALB	mutated MAGGIE motif	-0.47783828629491376	4.994738600000001
BALB	mutated MAGGIE motif	-1.1188953490869964	-3.88587651
BALB	mutated MAGGIE motif	-2.156956868814013	-6.5577542
BALB	mutated MAGGIE motif	-0.19264507794239583	-4.242896399999999
BALB	mutated MAGGIE motif	-0.6678555090695015	2.6022885000000002
BALB	mutated MAGGIE motif	-0.4180275418846553	6.364803200000001
BALB	mutated MAGGIE motif	0.015075320462098585	-4.430359799999999
BALB	mutated MAGGIE motif	-1.2535321123240277	4.755120400000001
BALB	mutated MAGGIE motif	0.8875252707415875	6.658212000000001
BALB	mutated MAGGIE motif	-0.18116975860993523	3.1963954
BALB	mutated MAGGIE motif	-0.9034626545963045	4.306351999999999
BALB	mutated MAGGIE motif	-0.6139216231976063	-6.688438
BALB	mutated MAGGIE motif	-1.1601081430821054	-2.8197915999999985
BALB	mutated MAGGIE motif	-2.2581521844540475	3.2194227999999994
BALB	mutated MAGGIE motif	-0.3219280948873622	2.162127999999999
BALB	mutated MAGGIE motif	-0.07691182292601795	-6.638448499999998
BALB	mutated MAGGIE motif	-0.22650852980867975	-3.429291
BALB	mutated MAGGIE motif	-0.2539750665463276	-4.8354723
BALB	mutated MAGGIE motif	-0.42963746716962703	6.274853499999998
BALB	mutated MAGGIE motif	-0.9418970454364315	-4.434980400000001
BALB	mutated MAGGIE motif	-0.6575807219783929	3.5480156000000003
BALB	mutated MAGGIE motif	0.26894191059950234	4.434980599999999
BALB	mutated MAGGIE motif	0.18903382439001712	-3.8638713
BALB	mutated MAGGIE motif	-0.2331991762930307	-3.0726940000000003
BALB	mutated MAGGIE motif	-0.351558442454444	5.7415447
BALB	mutated MAGGIE motif	0.35614381022527536	-2.2758127000000004
BALB	mutated MAGGIE motif	-0.878842873507709	-5.648285699999999
BALB	mutated MAGGIE motif	0.0	-3.6022137
BALB	mutated MAGGIE motif	1.5390262165542972	6.4194749
BALB	mutated MAGGIE motif	-0.10788475707187972	-5.102094600000001
BALB	mutated MAGGIE motif	-0.22650852980867975	3.2772564500000003
BALB	mutated MAGGIE motif	-0.3573617883819469	-2.3071289999999998
BALB	mutated MAGGIE motif	0.4613590672084116	4.371864700000001
BALB	mutated MAGGIE motif	-0.10843207403931077	-3.4954020000000003
BALB	mutated MAGGIE motif	0.07187740955080724	5.32094956
BALB	mutated MAGGIE motif	0.50110110561174	-6.1483656
BALB	mutated MAGGIE motif	1.1198656467835637	6.3794937
BALB	mutated MAGGIE motif	-0.3923174227787603	-4.363149
BALB	mutated MAGGIE motif	0.6754516539882669	-6.71440104
BALB	mutated MAGGIE motif	0.39821988121857	-3.7286417000000007
BALB	mutated MAGGIE motif	-0.8875252707415875	-3.9047178
BALB	mutated MAGGIE motif	-0.9418970454364315	-6.07398953
BALB	mutated MAGGIE motif	0.35614381022527536	3.2278330000000004
BALB	mutated MAGGIE motif	1.4206271809744813	2.7799924000000003
BALB	mutated MAGGIE motif	0.703382993641825	-3.9341125000000003
BALB	mutated MAGGIE motif	-0.06608919045777245	-6.611762000000001
BALB	mutated MAGGIE motif	0.29667530295545075	-3.6428632000000007
BALB	mutated MAGGIE motif	0.43423106451215454	5.622728
BALB	mutated MAGGIE motif	-0.6432076417571091	6.658211700000001
BALB	mutated MAGGIE motif	-0.9886846867721657	-4.522102299999999
BALB	mutated MAGGIE motif	0.5058909297299572	4.9593908
BALB	mutated MAGGIE motif	0.25485826848465454	-4.9579
BALB	mutated MAGGIE motif	-0.6713074981549148	-4.810726599999999
BALB	mutated MAGGIE motif	0.3517633244281253	-3.8427046999999996
BALB	mutated MAGGIE motif	-0.2677723248404571	5.523687300000001
BALB	mutated MAGGIE motif	0.18903382439001712	-4.179852700000001
BALB	mutated MAGGIE motif	-0.009947021919340493	4.9999553
BALB	mutated MAGGIE motif	-0.1588567644861123	-6.100443100000001
BALB	mutated MAGGIE motif	-2.1313774209530933	-4.429559499999999
BALB	mutated MAGGIE motif	-0.3438685086182294	-5.64324723
BALB	mutated MAGGIE motif	-3.22893526720322	-2.3532925000000002
BALB	mutated MAGGIE motif	-1.1537011991945496	-4.610434950000001
BALB	mutated MAGGIE motif	-1.1251793053693402	3.5995918000000002
BALB	mutated MAGGIE motif	-1.727920454563199	-2.605029
BALB	mutated MAGGIE motif	-0.3365634412557592	-2.880418500000001
BALB	mutated MAGGIE motif	-0.4192862361209735	-6.183650500000001
BALB	mutated MAGGIE motif	-0.8399227845140347	-2.6669079999999994
BALB	mutated MAGGIE motif	-0.15049162652745052	2.1417525
BALB	mutated MAGGIE motif	-0.38027208111816746	6.63844892
BALB	mutated MAGGIE motif	0.6534422386039227	2.732358800000001
BALB	mutated MAGGIE motif	-0.300356603036541	-2.948816700000001
BALB	mutated MAGGIE motif	-0.06608919045777245	-4.2194305
BALB	mutated MAGGIE motif	-1.655250944374837	-4.19671335
BALB	mutated MAGGIE motif	-1.3370349872775704	-4.7492908
BALB	mutated MAGGIE motif	0.0	2.1286120000000004
BALB	mutated MAGGIE motif	-0.4997553873182592	-4.9751916
BALB	mutated MAGGIE motif	-0.5974968544649304	-6.6582116000000005
BALB	mutated MAGGIE motif	-0.4688548725239232	2.8814966
BALB	mutated MAGGIE motif	0.4629719763425457	5.8952186
BALB	mutated MAGGIE motif	-0.35206006622851693	-3.7940774000000013
BALB	mutated MAGGIE motif	0.45998490533281844	-2.9670569999999996
BALB	mutated MAGGIE motif	-2.1313774209530933	2.3681405999999994
BALB	mutated MAGGIE motif	0.3261775678887202	5.0842929
BALB	mutated MAGGIE motif	-1.0387392978477719	5.853796
BALB	mutated MAGGIE motif	-1.2230861915065327	3.3735657000000003
BALB	mutated MAGGIE motif	-1.1270351182098985	3.2426974
BALB	mutated MAGGIE motif	-0.2556005540629567	2.0767760000000006
BALB	mutated MAGGIE motif	-0.38834051924056157	-4.9660096000000005
BALB	mutated MAGGIE motif	-0.8841361565450852	6.05525086
BALB	mutated MAGGIE motif	-0.6780719051126378	4.0262587
BALB	mutated MAGGIE motif	-0.8875252707415875	-6.426442999999999
BALB	mutated MAGGIE motif	0.0	6.658211999999999
BALB	mutated MAGGIE motif	0.0	-5.861530599999998
BALB	mutated MAGGIE motif	-0.22650852980867975	4.5461879000000005
BALB	mutated MAGGIE motif	0.10906997502679783	5.0903152999999985
BALB	mutated MAGGIE motif	1.714883096087933	-3.7441807000000003
BALB	mutated MAGGIE motif	-2.876488913745465	5.472406999999999
BALB	mutated MAGGIE motif	-0.3923174227787603	2.5890109999999997
BALB	mutated MAGGIE motif	2.4646682670034443	5.384015499999999
BALB	mutated MAGGIE motif	0.6016264225766443	-4.423942000000001
BALB	mutated MAGGIE motif	0.13701947910828993	5.287428900000001
BALB	mutated MAGGIE motif	-1.6870606883398924	-6.853966700000001
BALB	mutated MAGGIE motif	-3.7833760591231647	-5.363309000000001
BALB	mutated MAGGIE motif	-3.3154778827676865	-2.8371032699999996
BALB	mutated MAGGIE motif	-1.0	6.5577544
BALB	mutated MAGGIE motif	0.18903382439001712	-2.2468015
BALB	mutated MAGGIE motif	-0.8801764697931898	-2.0758446
BALB	mutated MAGGIE motif	0.6492900758253528	2.0722975999999997
BALB	mutated MAGGIE motif	-1.0578809160804998	-6.8337117
BALB	mutated MAGGIE motif	0.08830552903665279	-4.3356725
BALB	mutated MAGGIE motif	-0.1500007405339021	-3.8435813999999997
BALB	mutated MAGGIE motif	0.6415460290875237	6.5201712
BALB	mutated MAGGIE motif	0.18903382439001712	5.2874289999999995
BALB	mutated MAGGIE motif	-0.22650852980867975	2.9600622
BALB	mutated MAGGIE motif	0.0	-2.3984707999999992
BALB	mutated MAGGIE motif	-0.3465751013764966	-3.6960271500000004
BALB	mutated MAGGIE motif	-0.22650852980867975	-6.043804
BALB	mutated MAGGIE motif	-0.4197463093907703	4.096094000000001
BALB	mutated MAGGIE motif	0.18903382439001712	-3.18225
BALB	mutated MAGGIE motif	1.2690331464552371	4.1114180000000005
BALB	mutated MAGGIE motif	0.014109599415435436	-4.1429584
BALB	mutated MAGGIE motif	-0.03747470541866263	2.2009550000000004
BALB	mutated MAGGIE motif	-3.859534786382653	-6.1553595
BALB	mutated MAGGIE motif	-0.5842683967669982	-4.25197204
BALB	mutated MAGGIE motif	-0.1859254801360275	3.4599664999999993
BALB	mutated MAGGIE motif	-0.03747470541866263	2.7127184
BALB	mutated MAGGIE motif	-1.166526424980447	-6.0443937000000005
BALB	mutated MAGGIE motif	0.21931302840447586	-4.417173200000001
BALB	mutated MAGGIE motif	-0.5594274086140185	6.658211199999998
BALB	mutated MAGGIE motif	0.0	2.30028999
BALB	mutated MAGGIE motif	0.08365792904690939	4.412454650000001
BALB	mutated MAGGIE motif	-1.2786051117225883	-3.3735662
BALB	mutated MAGGIE motif	-0.6457165318002529	-3.9024422000000003
BALB	mutated MAGGIE motif	0.0	-8.6015389
BALB	mutated MAGGIE motif	-1.3078223275806318	-3.1420132
BALB	mutated MAGGIE motif	0.1523180579787513	-4.3138893
BALB	mutated MAGGIE motif	-0.7131724830008968	-2.8371034999999996
BALB	mutated MAGGIE motif	-0.8875252707415875	-6.658211999999999
BALB	mutated MAGGIE motif	-1.9313436393330574	3.9014680000000004
BALB	mutated MAGGIE motif	-0.46723837270778823	-2.9728923000000007
BALB	mutated MAGGIE motif	-0.34254345240965467	-5.197539
BALB	mutated MAGGIE motif	0.9267155739647679	-5.2093549
BALB	mutated MAGGIE motif	0.35614381022527536	-5.074528899999999
BALB	mutated MAGGIE motif	0.18903382439001712	3.2742540999999994
BALB	mutated MAGGIE motif	-0.23387191822216646	3.99427224
BALB	mutated MAGGIE motif	-0.6013044562674841	-4.5740916
BALB	mutated MAGGIE motif	0.82742054511171	3.3447807
BALB	mutated MAGGIE motif	-1.4996614634258298	-5.915853
BALB	mutated MAGGIE motif	-0.8330576232315456	-6.6384487000000005
BALB	mutated MAGGIE motif	0.025535092107137447	6.4900704000000005
BALB	mutated MAGGIE motif	-0.30472321844698325	-6.648149
BALB	mutated MAGGIE motif	-2.131856960608793	-6.5577545
BALB	mutated MAGGIE motif	0.3166723694358673	-7.419883799999999
BALB	mutated MAGGIE motif	1.1429579538420434	-5.479445000000002
BALB	mutated MAGGIE motif	-1.3742834999484983	5.5010047
BALB	mutated MAGGIE motif	-0.043441996028744434	-4.1893329999999995
BALB	mutated MAGGIE motif	1.495916889108126	5.084196599999999
BALB	mutated MAGGIE motif	0.24430719776488852	-9.7338531
BALB	mutated MAGGIE motif	-0.47783828629491376	3.9828447000000002
BALB	mutated MAGGIE motif	-0.5702475235115161	-2.6777290999999996
BALB	mutated MAGGIE motif	-0.6704318429105058	-6.3263359999999995
BALB	mutated MAGGIE motif	-0.22650852980867975	-4.024714999999999
BALB	mutated MAGGIE motif	0.7073526988446512	2.5226412
BALB	mutated MAGGIE motif	0.6686204297680657	-2.4822017
BALB	mutated MAGGIE motif	0.0	6.714401299999999
BALB	mutated MAGGIE motif	1.6048620581588613	6.0997412
BALB	mutated MAGGIE motif	-0.6704318429105058	6.039497499999999
BALB	mutated MAGGIE motif	-1.1947713790507835	2.5849624500000004
BALB	mutated MAGGIE motif	1.5390262165542972	5.0286282
BALB	mutated MAGGIE motif	-1.8430554913723336	-3.945078799999999
BALB	mutated MAGGIE motif	-0.4703313891496985	5.861529999999999
BALB	mutated MAGGIE motif	-0.5594274086140185	5.1554325
BALB	mutated MAGGIE motif	-1.0141938815827545	3.5544589999999996
BALB	mutated MAGGIE motif	0.0	-6.6582114
BALB	mutated MAGGIE motif	-0.05016678669450014	-3.519727200000001
BALB	mutated MAGGIE motif	0.5092006461972431	-2.9400696
BALB	mutated MAGGIE motif	-0.4895844526438977	2.863648999999999
BALB	mutated MAGGIE motif	0.0	6.658212000000001
BALB	mutated MAGGIE motif	-0.4222330006830478	4.3422947
BALB	mutated MAGGIE motif	-1.2324724276938794	-3.934112399999999
BALB	mutated MAGGIE motif	-0.34337651415139736	-4.759621000000001
BALB	mutated MAGGIE motif	-0.18004504116276188	3.3735669999999995
BALB	mutated MAGGIE motif	-0.12659324961411	5.316067200000001
BALB	mutated MAGGIE motif	-0.06608919045777245	-4.931908099999999
BALB	mutated MAGGIE motif	0.6793473096815328	4.4295215
BALB	mutated MAGGIE motif	-1.6690559406285086	-6.557754500000001
BALB	mutated MAGGIE motif	0.18903382439001712	3.6276639000000004
BALB	mutated MAGGIE motif	-0.3816343410116303	-3.3571850999999997
BALB	mutated MAGGIE motif	-0.6984914463515703	-3.0959694000000004
BALB	mutated MAGGIE motif	0.21931302840447586	-6.271826599999999
BALB	mutated MAGGIE motif	0.10581412006921598	2.9752660000000004
BALB	mutated MAGGIE motif	-0.8982059982432742	2.4128415999999993
BALB	mutated MAGGIE motif	-0.06608919045777245	-3.5253048999999996
BALB	mutated MAGGIE motif	0.5058909297299572	-2.9613991
BALB	mutated MAGGIE motif	-2.0973249068624464	5.9862719
BALB	mutated MAGGIE motif	-0.13816243905752446	3.4768383000000007
BALB	mutated MAGGIE motif	-0.0943665707767316	-5.3732681
BALB	mutated MAGGIE motif	0.46413204880701353	-4.186986900000001
BALB	mutated MAGGIE motif	-0.1352856985001165	-4.348095
BALB	mutated MAGGIE motif	-0.48816006772421927	5.084196599999999
BALB	mutated MAGGIE motif	0.0	-4.4349815
BALB	mutated MAGGIE motif	-0.7613087855323655	-6.127065
BALB	mutated MAGGIE motif	-0.05577325311850867	-6.658211
BALB	mutated MAGGIE motif	0.30248367706567425	6.568710300000001
BALB	mutated MAGGIE motif	0.7487748964558396	6.5878250000000005
BALB	mutated MAGGIE motif	0.3233159690116052	-3.373566499999999
BALB	mutated MAGGIE motif	0.5528503155674036	-6.587824099999999
BALB	mutated MAGGIE motif	5.044487998977221	-2.7127184
BALB	mutated MAGGIE motif	0.27938239992127745	3.2265593
BALB	mutated MAGGIE motif	0.5058909297299572	-6.546208999999999
BALB	mutated MAGGIE motif	-0.13364088411753627	-4.91803
BALB	mutated MAGGIE motif	-2.0548240247445215	-2.7789306
BALB	mutated MAGGIE motif	-0.48137999410753984	3.004159999999999
BALB	mutated MAGGIE motif	-0.6688599154115273	-4.800011100000001
BALB	mutated MAGGIE motif	-0.5084643632471129	2.2168399999999995
BALB	mutated MAGGIE motif	-0.3923174227787603	-6.6582113000000005
BALB	mutated MAGGIE motif	-1.802060622388091	4.852935800000001
BALB	mutated MAGGIE motif	-0.088657619820397	-2.990126
BALB	mutated MAGGIE motif	-0.22650852980867975	-2.6809829999999994
BALB	mutated MAGGIE motif	-0.24340559908486115	9.8960687
BALB	mutated MAGGIE motif	-0.03747470541866263	-4.546209559999999
BALB	mutated MAGGIE motif	0.11607055283479273	-5.175444000000001
BALB	mutated MAGGIE motif	0.1296352804165956	11.901682000000001
BALB	mutated MAGGIE motif	0.6686204297680657	5.129523900000001
BALB	mutated MAGGIE motif	0.16106243273251608	5.979672000000001
BALB	mutated MAGGIE motif	-0.03747470541866263	5.8786793
BALB	mutated MAGGIE motif	0.0	-2.1153085999999997
BALB	mutated MAGGIE motif	-0.2708155698054049	5.61988285
BALB	mutated MAGGIE motif	0.05176142768974157	-4.5306805
BALB	mutated MAGGIE motif	-0.6415460290875235	-5.054759000000001
BALB	mutated MAGGIE motif	-2.7206176000787226	-5.6254714
BALB	mutated MAGGIE motif	-1.380142708832658	-6.6730775
BALB	mutated MAGGIE motif	-0.11352894563041438	2.247333000000001
BALB	mutated MAGGIE motif	-1.1856432351892428	6.839040700000001
BALB	mutated MAGGIE motif	-0.23840473932507883	2.589563400000001
BALB	mutated MAGGIE motif	0.0	6.4376547
BALB	mutated MAGGIE motif	-0.46489997227405677	2.1539728000000005
BALB	mutated MAGGIE motif	-0.4549462207154802	-4.5548237
BALB	mutated MAGGIE motif	0.35614381022527536	-5.0742970000000005
BALB	mutated MAGGIE motif	-0.4182257769098916	3.5447138000000002
BALB	mutated MAGGIE motif	-0.3528221028331462	2.09711646
BALB	mutated MAGGIE motif	0.18271911365836502	-5.8763549
BALB	mutated MAGGIE motif	0.0	-5.0783999999999985
BALB	mutated MAGGIE motif	-0.7089512179966093	3.850641500000001
BALB	mutated MAGGIE motif	-0.2677723248404571	-8.25193971
BALB	mutated MAGGIE motif	0.5218087719296216	4.550337799999999
BALB	mutated MAGGIE motif	-0.6853802868283743	6.638448400000001
BALB	mutated MAGGIE motif	-0.10691520391651199	-4.077264999999999
BALB	mutated MAGGIE motif	-0.22650852980867975	-5.377833000000001
BALB	mutated MAGGIE motif	-0.906323609929816	-8.7697004
BALB	mutated MAGGIE motif	0.4652922700585397	-3.040845899999999
BALB	mutated MAGGIE motif	-0.7528820129485263	-6.6384486
BALB	mutated MAGGIE motif	-1.4382928515791469	-6.853967000000001
BALB	mutated MAGGIE motif	0.3242469194544242	-4.074078100000001
BALB	mutated MAGGIE motif	-0.22512566189042582	9.908984
BALB	mutated MAGGIE motif	-0.7021030741499272	6.09487556
BALB	mutated MAGGIE motif	-0.041713476688756135	-2.2927591000000005
BALB	mutated MAGGIE motif	-0.8423364969753324	-5.3315569
BALB	mutated MAGGIE motif	0.9927684307689242	-2.165039
BALB	mutated MAGGIE motif	0.35614381022527536	-2.8020298500000007
BALB	mutated MAGGIE motif	0.0	-4.8884988400000005
BALB	mutated MAGGIE motif	-0.8253214685870529	-2.9328850000000006
BALB	mutated MAGGIE motif	1.0977600486610628	3.3735663000000002
BALB	mutated MAGGIE motif	-0.2521186283546102	6.5388405999999994
BALB	mutated MAGGIE motif	0.33555137875133756	-3.1954320000000003
BALB	mutated MAGGIE motif	-1.3452491691219812	-2.7646409999999992
BALB	mutated MAGGIE motif	-1.7744402995848687	-4.431505000000001
BALB	mutated MAGGIE motif	0.24603229068942056	6.584962599999999
BALB	mutated MAGGIE motif	-1.4714576428642538	-3.671552000000001
BALB	mutated MAGGIE motif	-0.38348276540399895	-4.84952292
BALB	mutated MAGGIE motif	-1.266890140501233	-4.822779000000001
BALB	mutated MAGGIE motif	-0.2108900290829716	3.3735661
BALB	mutated MAGGIE motif	0.9927684307689242	4.406492999999999
BALB	mutated MAGGIE motif	-1.2448870591235344	3.480026500000001
BALB	mutated MAGGIE motif	-2.5907894392279056	-2.950050700000001
BALB	mutated MAGGIE motif	0.7739963251111731	5.069416
BALB	mutated MAGGIE motif	-0.9897680773890438	3.3460433999999997
BALB	mutated MAGGIE motif	-2.008823850387006	5.3132757999999995
BALB	mutated MAGGIE motif	-1.61158900276651	-3.906388999999999
BALB	mutated MAGGIE motif	0.0	-5.3977553
BALB	mutated MAGGIE motif	0.0	6.7134888
BALB	mutated MAGGIE motif	-0.22650852980867975	9.3594412
BALB	mutated MAGGIE motif	1.8532430761209089	-6.269568700000001
BALB	mutated MAGGIE motif	-0.531613076128223	5.2551814
BALB	mutated MAGGIE motif	-0.7484612330040357	-9.4012531
BALB	mutated MAGGIE motif	-0.6112050018611965	2.7879463
BALB	mutated MAGGIE motif	-0.888743248898259	-3.6921799999999996
BALB	mutated MAGGIE motif	0.26932066868122506	-4.041312999999999
BALB	mutated MAGGIE motif	-0.6301424840252761	-3.1721509999999995
BALB	mutated MAGGIE motif	0.2824311001148634	3.0794213000000004
BALB	mutated MAGGIE motif	-0.20862586333628474	5.939850999999999
BALB	mutated MAGGIE motif	0.0	-3.5741587
BALB	mutated MAGGIE motif	-0.6894566685922621	-4.381531800000001
BALB	mutated MAGGIE motif	-1.148010225013872	4.1806178
BALB	mutated MAGGIE motif	-0.8366248337350015	4.9287275500000005
BALB	mutated MAGGIE motif	0.21996568394190819	-4.0933098999999995
BALB	mutated MAGGIE motif	2.1534223705303845	6.274852700000001
BALB	mutated MAGGIE motif	-1.3444985064626898	-3.8989771
BALB	mutated MAGGIE motif	0.35614381022527536	-4.0000002
BALB	mutated MAGGIE motif	-0.38348276540399895	-6.379493499999999
BALB	mutated MAGGIE motif	-0.8695540801054888	2.1068525499999997
BALB	mutated MAGGIE motif	-1.831877241191673	2.36866197
BALB	mutated MAGGIE motif	1.2193130284044758	6.7249631
BALB	mutated MAGGIE motif	0.35614381022527536	-6.587824599999999
BALB	mutated MAGGIE motif	0.04182017569462726	6.281822000000001
BALB	mutated MAGGIE motif	-0.2702168807050169	-2.7356991699999997
BALB	mutated MAGGIE motif	-1.8008211935825735	-3.0715821
BALB	mutated MAGGIE motif	0.27938239992127745	-4.742756099999999
BALB	mutated MAGGIE motif	0.0	7.1679402
BALB	mutated MAGGIE motif	-0.6160408119065997	-8.682572400000002
BALB	mutated MAGGIE motif	-0.22650852980867975	-5.4543947500000005
BALB	mutated MAGGIE motif	1.2106447613536178	-5.804855659999999
BALB	mutated MAGGIE motif	0.9498538920159856	3.77132656
BALB	mutated MAGGIE motif	0.8624964762500649	-3.3676554000000003
BALB	mutated MAGGIE motif	0.38150787571364964	2.048973
BALB	mutated MAGGIE motif	-0.0011601890781176571	6.658211499999999
BALB	mutated MAGGIE motif	-0.3816343410116303	3.2167064000000005
BALB	mutated MAGGIE motif	0.24014889214060586	2.837103599999998
BALB	mutated MAGGIE motif	-0.4222330006830478	4.0622692
BALB	mutated MAGGIE motif	0.0	6.560602
BALB	mutated MAGGIE motif	-0.7655347463629774	-5.0582289
BALB	mutated MAGGIE motif	-0.7685168425926951	-6.724963499999999
BALB	mutated MAGGIE motif	0.1296352804165956	4.0
BALB	mutated MAGGIE motif	-0.01946986419822494	3.5737830999999995
BALB	altered spacing	-0.7760324883914915	na
BALB	altered spacing	0.5058909297299572	na
BALB	altered spacing	-0.06608919045777245	na
BALB	altered spacing	0.0	na
BALB	altered spacing	-0.04306872189188571	na
BALB	altered spacing	-0.8875252707415875	na
BALB	altered spacing	-0.8845227825800639	na
BALB	altered spacing	0.7851296983557905	na
BALB	altered spacing	0.23969649884898558	na
BALB	altered spacing	-0.6129768768907526	na
BALB	altered spacing	-0.22908707391045624	na
BALB	altered spacing	0.0	na
BALB	altered spacing	0.0	na
BALB	altered spacing	0.38743542771634853	na
BALB	altered spacing	-0.23840473932507883	na
BALB	altered spacing	0.0	na
BALB	altered spacing	-0.5191378647615654	na
BALB	altered spacing	0.13906403773755183	na
BALB	altered spacing	-0.48938484073892496	na
BALB	altered spacing	0.0	na
BALB	altered spacing	-0.8657365819763005	na
BALB	altered spacing	-0.22650852980867975	na
BALB	altered spacing	-0.2531613473469285	na
BALB	altered spacing	-0.3923174227787603	na
BALB	altered spacing	-0.711252270538564	na
BALB	altered spacing	-1.59777618644892	na
BALB	altered spacing	-3.134426320220926	na
BALB	altered spacing	0.7721940824771878	na
BALB	altered spacing	-0.7339631060046825	na
BALB	altered spacing	0.31950135749282227	na
BALB	altered spacing	-0.15293717896870618	na
BALB	altered spacing	-0.5594274086140185	na
BALB	altered spacing	0.8875252707415875	na
BALB	altered spacing	-1.137503523749935	na
BALB	altered spacing	0.4705326118705475	na
BALB	altered spacing	0.0	na
BALB	altered spacing	-1.1590776192053198	na
BALB	altered spacing	-0.5628440947364359	na
BALB	altered spacing	0.6905166714792828	na
BALB	altered spacing	0.6415460290875237	na
BALB	altered spacing	0.0	na
BALB	altered spacing	-0.5683158347891495	na
BALB	altered spacing	-0.35206006622851693	na
BALB	altered spacing	0.18903382439001712	na
BALB	altered spacing	1.2690331464552371	na
BALB	altered spacing	0.35614381022527536	na
BALB	altered spacing	0.18903382439001712	na
BALB	altered spacing	0.3517633244281253	na
BALB	altered spacing	-0.07546718220125426	na
BALB	altered spacing	-0.31135885317717493	na
BALB	altered spacing	-0.9819284270779818	na
BALB	altered spacing	-0.4455244208102227	na
BALB	altered spacing	-0.22650852980867975	na
BALB	altered spacing	0.10169539706935082	na
BALB	no motif/spacing effect	-0.5594274086140185	na
BALB	no motif/spacing effect	0.0	na
BALB	no motif/spacing effect	0.0	na
BALB	no motif/spacing effect	-0.22650852980867975	na
BALB	no motif/spacing effect	-0.3569345447152755	na
BALB	no motif/spacing effect	-0.22650852980867975	na
BALB	no motif/spacing effect	-0.509320033481234	na
BALB	no motif/spacing effect	-0.6250399400964914	na
BALB	no motif/spacing effect	-0.3170292954745233	na
BALB	no motif/spacing effect	-0.40427106840977367	na
BALB	no motif/spacing effect	-0.03952836418663774	na
BALB	no motif/spacing effect	0.1381022766287885	na
BALB	no motif/spacing effect	0.4652922700585397	na
BALB	no motif/spacing effect	-0.2539750665463276	na
BALB	no motif/spacing effect	0.27938239992127745	na
BALB	no motif/spacing effect	-0.5781733350585172	na
BALB	no motif/spacing effect	0.18042860916408987	na
BALB	no motif/spacing effect	0.34729052700878826	na
BALB	no motif/spacing effect	-0.4107880262774861	na
BALB	no motif/spacing effect	-0.4573032262558536	na
BALB	no motif/spacing effect	-0.22650852980867975	na
BALB	no motif/spacing effect	0.046997479537169484	na
BALB	no motif/spacing effect	0.0	na
BALB	no motif/spacing effect	0.0	na
BALB	no motif/spacing effect	0.18903382439001712	na
BALB	no motif/spacing effect	0.3517633244281253	na
BALB	no motif/spacing effect	0.15672550368745308	na
BALB	no motif/spacing effect	0.05176142768974157	na
BALB	no motif/spacing effect	-0.7956967168732294	na
BALB	no motif/spacing effect	-0.18590729998416755	na
BALB	no motif/spacing effect	-0.5358679511929865	na
BALB	no motif/spacing effect	0.17944777556081892	na
BALB	no motif/spacing effect	0.1296352804165956	na
BALB	no motif/spacing effect	-0.3923174227787603	na
BALB	no motif/spacing effect	-0.6250399400964914	na
BALB	no motif/spacing effect	-0.6145206919560899	na
BALB	no motif/spacing effect	-0.888743248898259	na
BALB	no motif/spacing effect	-2.0028260440787635	na
BALB	no motif/spacing effect	0.7739963251111731	na
BALB	no motif/spacing effect	0.08365792904690939	na
BALB	no motif/spacing effect	0.27938239992127745	na
BALB	no motif/spacing effect	0.0	na
BALB	no motif/spacing effect	-0.22686589791575562	na
BALB	no motif/spacing effect	0.13795727278367664	na
BALB	no motif/spacing effect	-0.03747470541866263	na
BALB	no motif/spacing effect	-0.4344739787432532	na
BALB	no motif/spacing effect	-0.871745509327559	na
BALB	no motif/spacing effect	0.35614381022527536	na
BALB	no motif/spacing effect	-0.5397499238375527	na
BALB	no motif/spacing effect	-0.4715694576986138	na
BALB	no motif/spacing effect	-1.126474745408915	na
BALB	no motif/spacing effect	-0.5313365310422151	na
BALB	no motif/spacing effect	-0.5267478867758602	na
BALB	no motif/spacing effect	-0.40765796891324646	na
BALB	no motif/spacing effect	0.0	na
BALB	no motif/spacing effect	-0.02911174824129903	na
BALB	no motif/spacing effect	-0.5025003405291832	na
BALB	no motif/spacing effect	-0.679959014656903	na
BALB	no motif/spacing effect	-0.6301424840252761	na
BALB	no motif/spacing effect	0.5707486415014551	na
BALB	no motif/spacing effect	0.6020360140800975	na
BALB	no motif/spacing effect	-0.07579535054220399	na
BALB	no motif/spacing effect	-0.22650852980867975	na
BALB	no motif/spacing effect	0.18903382439001712	na
BALB	no motif/spacing effect	-0.8126000320030577	na
BALB	no motif/spacing effect	-0.088657619820397	na
BALB	no motif/spacing effect	0.0	na
BALB	no motif/spacing effect	1.1528514880833711	na
BALB	no motif/spacing effect	-0.5074133812568924	na
BALB	no motif/spacing effect	0.0	na
BALB	no motif/spacing effect	1.0637207523764927	na
BALB	no motif/spacing effect	1.4736791671874117	na
BALB	no motif/spacing effect	1.9025576743588286	na
BALB	no motif/spacing effect	1.032158667774374	na
BALB	no motif/spacing effect	1.1222345835952452	na
BALB	no motif/spacing effect	-1.4671260104272976	na
BALB	no motif/spacing effect	-0.21971866826783604	na
BALB	no motif/spacing effect	-0.4430199118047242	na
BALB	no motif/spacing effect	-0.008127880883400218	na
BALB	no motif/spacing effect	-0.5362128531247783	na
BALB	no motif/spacing effect	-0.7229075531787115	na
BALB	no motif/spacing effect	-0.26769578320365683	na
BALB	no motif/spacing effect	-0.009242152304848705	na
BALB	no motif/spacing effect	-0.3824350010302675	na
BALB	no motif/spacing effect	0.0	na
BALB	no motif/spacing effect	1.1826922975161902	na
BALB	no motif/spacing effect	0.5707018075959864	na
BALB	no motif/spacing effect	-0.5134811871279039	na
BALB	no motif/spacing effect	-1.2507891202963801	na
BALB	no motif/spacing effect	0.7739963251111731	na
BALB	no motif/spacing effect	-0.27071155762234955	na
BALB	no motif/spacing effect	-0.7137996095871637	na
BALB	no motif/spacing effect	-0.22650852980867975	na
BALB	no motif/spacing effect	-0.7559956480362855	na
BALB	no motif/spacing effect	0.10561018796059884	na
BALB	no motif/spacing effect	-0.5914831673737542	na
BALB	no motif/spacing effect	-1.729757335755882	na
BALB	no motif/spacing effect	-1.17844676173942	na
BALB	no motif/spacing effect	-0.906407199711589	na
BALB	no motif/spacing effect	-0.9774092957854257	na
BALB	no motif/spacing effect	0.2170981216669352	na
BALB	no motif/spacing effect	-1.3259863114617159	na
BALB	no motif/spacing effect	0.6610167409329077	na
BALB	no motif/spacing effect	-0.4222330006830478	na
BALB	no motif/spacing effect	0.048140144454086986	na
BALB	no motif/spacing effect	-0.38226588072562784	na
BALB	no motif/spacing effect	0.3701153933622887	na
BALB	no motif/spacing effect	-0.03747470541866263	na
BALB	no motif/spacing effect	-0.4044682575686567	na
BALB	no motif/spacing effect	-0.24257030327407847	na
BALB	no motif/spacing effect	-0.21376361237583685	na
BALB	no motif/spacing effect	-0.2331991762930307	na
BALB	no motif/spacing effect	0.27938239992127745	na
BALB	no motif/spacing effect	0.03631369938808371	na
BALB	no motif/spacing effect	-0.1605991171334349	na
BALB	no motif/spacing effect	-0.7013702556992776	na
BALB	no motif/spacing effect	0.18903382439001712	na
BALB	no motif/spacing effect	0.002643106157710129	na
BALB	no motif/spacing effect	-0.2345199001414846	na
BALB	no motif/spacing effect	0.18903382439001712	na
BALB	no motif/spacing effect	-0.40551472516033704	na
BALB	no motif/spacing effect	0.0	na
BALB	no motif/spacing effect	-0.3750580613101979	na
BALB	no motif/spacing effect	-0.4279725546063471	na
BALB	no motif/spacing effect	0.0	na
BALB	no motif/spacing effect	-0.485426827170242	na
BALB	no motif/spacing effect	-0.7586606652655252	na
BALB	no motif/spacing effect	-0.36219608196436637	na
BALB	no motif/spacing effect	-0.8184277877283543	na
BALB	no motif/spacing effect	0.3310385133320759	na
BALB	no motif/spacing effect	-1.148010225013872	na
BALB	no motif/spacing effect	-1.4503580350118352	na
BALB	no motif/spacing effect	0.6424479953819162	na
BALB	no motif/spacing effect	-0.5849625007211556	na
BALB	no motif/spacing effect	0.13906403773755183	na
BALB	no motif/spacing effect	0.0	na
BALB	no motif/spacing effect	0.6610167409329077	na
BALB	no motif/spacing effect	-0.2576296013929895	na
BALB	no motif/spacing effect	-0.2594940481285457	na
BALB	no motif/spacing effect	0.0	na
BALB	no motif/spacing effect	-0.22650852980867975	na
BALB	no motif/spacing effect	-0.628031222613042	na
BALB	no motif/spacing effect	0.0	na
BALB	no motif/spacing effect	0.21931302840447586	na
BALB	no motif/spacing effect	0.0	na
BALB	no motif/spacing effect	-0.06608919045777245	na
BALB	no motif/spacing effect	-0.3728092638895464	na
BALB	no motif/spacing effect	-0.556111590491938	na
BALB	no motif/spacing effect	-0.8338785732387999	na
BALB	no motif/spacing effect	-0.13318798692611367	na
BALB	no motif/spacing effect	0.0	na
BALB	no motif/spacing effect	-0.22650852980867975	na
BALB	no motif/spacing effect	1.0425246166465574	na
BALB	no motif/spacing effect	-0.22650852980867975	na
BALB	no motif/spacing effect	0.08365792904690939	na
BALB	no motif/spacing effect	-0.4222330006830478	na
BALB	no motif/spacing effect	-1.1859254801360275	na
BALB	no motif/spacing effect	-0.8486698726342716	na
BALB	no motif/spacing effect	0.0	na
BALB	no motif/spacing effect	0.1154772174199361	na
BALB	no motif/spacing effect	-1.1321946123648698	na
BALB	no motif/spacing effect	0.004983407514255411	na
BALB	no motif/spacing effect	0.0	na
BALB	no motif/spacing effect	0.0	na
BALB	no motif/spacing effect	0.0	na
BALB	no motif/spacing effect	0.0	na
BALB	no motif/spacing effect	0.18903382439001712	na
BALB	no motif/spacing effect	0.0	na
BALB	no motif/spacing effect	0.0	na
BALB	no motif/spacing effect	-1.7597155274566982	na
BALB	no motif/spacing effect	0.0	na
BALB	no motif/spacing effect	-0.35151236149362974	na
BALB	no motif/spacing effect	-0.12683002223548256	na
BALB	no motif/spacing effect	-0.06608919045777245	na
BALB	no motif/spacing effect	-0.8949798810780152	na
BALB	no motif/spacing effect	-0.40427106840977367	na
BALB	no motif/spacing effect	0.8026417684345752	na
BALB	no motif/spacing effect	0.46117646268093093	na
BALB	no motif/spacing effect	0.43423106451215454	na
BALB	no motif/spacing effect	0.2803354197909971	na
BALB	no motif/spacing effect	0.21030256015808124	na
BALB	no motif/spacing effect	-0.24340559908486115	na
BALB	no motif/spacing effect	0.0	na
BALB	no motif/spacing effect	-0.22650852980867975	na
BALB	no motif/spacing effect	0.0	na
BALB	no motif/spacing effect	0.2817709684153793	na
BALB	no motif/spacing effect	0.5157884151092975	na
BALB	no motif/spacing effect	0.28239973070072466	na
BALB	no motif/spacing effect	-0.17098619681262273	na
BALB	no motif/spacing effect	-0.23840473932507883	na
BALB	no motif/spacing effect	-0.6704318429105058	na
BALB	no motif/spacing effect	-0.162347594727414	na
BALB	no motif/spacing effect	-0.3816343410116303	na
BALB	no motif/spacing effect	-0.2903498054369229	na
BALB	no motif/spacing effect	-0.38299422141369277	na
BALB	no motif/spacing effect	-0.3561438102252752	na
BALB	no motif/spacing effect	-0.8073549220576042	na
BALB	no motif/spacing effect	-0.5543514073056066	na
BALB	no motif/spacing effect	-0.2688624608202965	na
BALB	no motif/spacing effect	-0.19793937761190894	na
BALB	no motif/spacing effect	-0.22686589791575562	na
BALB	no motif/spacing effect	0.18903382439001712	na
BALB	no motif/spacing effect	-0.2883454943629813	na
BALB	no motif/spacing effect	0.2929767211912333	na
BALB	no motif/spacing effect	-0.5545573686272833	na
BALB	no motif/spacing effect	-0.6600416175156629	na
BALB	no motif/spacing effect	-0.22650852980867975	na
BALB	no motif/spacing effect	-1.3941040422527746	na
BALB	no motif/spacing effect	-0.6904556295684698	na
BALB	no motif/spacing effect	0.4594316186372973	na
BALB	no motif/spacing effect	0.6943098969095169	na
BALB	no motif/spacing effect	0.6943098969095169	na
BALB	no motif/spacing effect	-0.25945451555799304	na
BALB	no motif/spacing effect	0.1855556531560767	na
BALB	no motif/spacing effect	0.4135585703529303	na
BALB	no motif/spacing effect	-0.03747470541866263	na
BALB	no motif/spacing effect	0.17941757906332878	na
BALB	no motif/spacing effect	-0.7747870596011732	na
BALB	no motif/spacing effect	-0.06780431547987131	na
BALB	no motif/spacing effect	-0.581411686620315	na
BALB	no motif/spacing effect	0.0	na
BALB	no motif/spacing effect	-0.40551472516033704	na
BALB	no motif/spacing effect	0.1296352804165956	na
BALB	no motif/spacing effect	0.0	na
BALB	no motif/spacing effect	0.18903382439001712	na
BALB	no motif/spacing effect	0.0	na
BALB	no motif/spacing effect	0.18903382439001712	na
BALB	no motif/spacing effect	0.6898198145402654	na
BALB	no motif/spacing effect	-0.40551472516033704	na
BALB	no motif/spacing effect	-0.5945485495503542	na
BALB	no motif/spacing effect	-0.23840473932507883	na
BALB	no motif/spacing effect	0.0	na
BALB	no motif/spacing effect	-0.22650852980867975	na
BALB	no motif/spacing effect	-0.888743248898259	na
BALB	no motif/spacing effect	-0.03747470541866263	na
BALB	no motif/spacing effect	0.5058909297299572	na
BALB	no motif/spacing effect	0.18903382439001712	na
BALB	no motif/spacing effect	-0.2331991762930307	na
BALB	no motif/spacing effect	0.0	na
BALB	no motif/spacing effect	-0.24597924165406382	na
BALB	no motif/spacing effect	-0.7866635906259192	na
BALB	no motif/spacing effect	-0.02017788193763037	na
BALB	no motif/spacing effect	0.9161880127626176	na
BALB	no motif/spacing effect	0.7540207583459362	na
BALB	no motif/spacing effect	-0.47404455873370344	na
BALB	no motif/spacing effect	0.35614381022527536	na
BALB	no motif/spacing effect	0.3517633244281253	na
BALB	no motif/spacing effect	-0.7530515591816416	na
BALB	no motif/spacing effect	0.21931302840447586	na
BALB	no motif/spacing effect	-1.3458986573834437	na
BALB	no motif/spacing effect	0.277265024300414	na
BALB	no motif/spacing effect	0.8923508802386442	na
BALB	no motif/spacing effect	-1.1973782141831184	na
BALB	no motif/spacing effect	0.740545484442007	na
BALB	no motif/spacing effect	0.046997479537169484	na
BALB	no motif/spacing effect	-0.22650852980867975	na
BALB	no motif/spacing effect	0.6610167409329077	na
BALB	no motif/spacing effect	0.17944777556081892	na
BALB	no motif/spacing effect	0.18903382439001712	na
BALB	no motif/spacing effect	0.35614381022527536	na
BALB	no motif/spacing effect	0.23946593469538935	na
BALB	no motif/spacing effect	0.27938239992127745	na
BALB	no motif/spacing effect	-0.2177716668177876	na
BALB	no motif/spacing effect	0.3517633244281253	na
BALB	no motif/spacing effect	0.10561018796059884	na
BALB	no motif/spacing effect	-0.22650852980867975	na
BALB	no motif/spacing effect	-0.391020618160308	na
BALB	no motif/spacing effect	-0.056795705003398034	na
BALB	no motif/spacing effect	0.03439700778051069	na
BALB	no motif/spacing effect	0.0	na
BALB	no motif/spacing effect	-0.06608919045777245	na
BALB	no motif/spacing effect	-1.1251793053693402	na
BALB	no motif/spacing effect	0.0	na
BALB	no motif/spacing effect	0.0	na
BALB	no motif/spacing effect	0.2246842328444374	na
BALB	no motif/spacing effect	-0.13219461236486962	na
BALB	no motif/spacing effect	-1.488470070004599	na
BALB	no motif/spacing effect	-0.6311709301436097	na
BALB	no motif/spacing effect	-0.4974073181233991	na
BALB	no motif/spacing effect	-0.4329594072761065	na
BALB	no motif/spacing effect	-0.30938571171498097	na
BALB	no motif/spacing effect	-0.9324019218491897	na
BALB	no motif/spacing effect	-0.5945485495503542	na
BALB	no motif/spacing effect	-0.32598631146171586	na
BALB	no motif/spacing effect	0.5058909297299572	na
BALB	no motif/spacing effect	0.0	na
BALB	no motif/spacing effect	-1.4703677195883742	na
BALB	no motif/spacing effect	0.35614381022527536	na
BALB	no motif/spacing effect	-0.2556005540629567	na
BALB	no motif/spacing effect	-0.20306416040202624	na
BALB	no motif/spacing effect	-0.34337651415139736	na
BALB	no motif/spacing effect	-0.10291831294556664	na
BALB	no motif/spacing effect	-0.7843808072589784	na
BALB	no motif/spacing effect	0.06819436065650297	na
BALB	no motif/spacing effect	0.30671013810690306	na
BALB	no motif/spacing effect	0.0	na
BALB	no motif/spacing effect	-0.17438041192755227	na
BALB	no motif/spacing effect	-1.35572096359218	na
BALB	no motif/spacing effect	0.35614381022527536	na
BALB	no motif/spacing effect	0.13906403773755183	na
BALB	no motif/spacing effect	-0.2331991762930307	na
BALB	no motif/spacing effect	-0.7335670177043412	na
BALB	no motif/spacing effect	-0.24597924165406382	na
BALB	no motif/spacing effect	0.203328159709526	na
BALB	no motif/spacing effect	-0.22650852980867975	na
BALB	no motif/spacing effect	1.2373427628024196	na
BALB	no motif/spacing effect	1.9624739887245104	na
BALB	no motif/spacing effect	-0.088657619820397	na
BALB	no motif/spacing effect	0.35614381022527536	na
BALB	no motif/spacing effect	-0.35206006622851693	na
BALB	no motif/spacing effect	0.4303291512314342	na
BALB	no motif/spacing effect	0.0	na
BALB	no motif/spacing effect	0.5058909297299572	na
BALB	no motif/spacing effect	-0.22650852980867975	na
BALB	no motif/spacing effect	-0.5313814605163121	na
BALB	no motif/spacing effect	-0.7265733139501815	na
BALB	no motif/spacing effect	0.08365792904690939	na
BALB	no motif/spacing effect	-0.4123231145818078	na
BALB	no motif/spacing effect	-0.6675595867996795	na
BALB	no motif/spacing effect	-0.3715982380139464	na
BALB	no motif/spacing effect	0.025535092107137447	na
BALB	no motif/spacing effect	0.0	na
BALB	no motif/spacing effect	-0.22650852980867975	na
BALB	no motif/spacing effect	-0.021844389043220058	na
BALB	no motif/spacing effect	-0.8148030286410233	na
BALB	no motif/spacing effect	0.6081521280930462	na
BALB	no motif/spacing effect	0.5474877953024934	na
BALB	no motif/spacing effect	-0.6074611249603956	na
BALB	no motif/spacing effect	-0.40551472516033704	na
BALB	no motif/spacing effect	-0.4098757941630651	na
BALB	no motif/spacing effect	-1.0202896744322043	na
BALB	no motif/spacing effect	-1.01435529297707	na
BALB	no motif/spacing effect	-0.5594274086140185	na
BALB	no motif/spacing effect	-0.5816023710085076	na
BALB	no motif/spacing effect	-0.086342461188746	na
BALB	no motif/spacing effect	0.04315461449101754	na
BALB	no motif/spacing effect	-0.0890631686921819	na
BALB	no motif/spacing effect	-0.20966048440550455	na
BALB	no motif/spacing effect	0.18903382439001712	na
BALB	no motif/spacing effect	-0.5594274086140185	na
BALB	no motif/spacing effect	-0.4573032262558536	na
BALB	no motif/spacing effect	-0.3764572764061933	na
BALB	no motif/spacing effect	-0.7414934756102673	na
BALB	no motif/spacing effect	-1.406434390856334	na
BALB	no motif/spacing effect	-0.6741046198194875	na
BALB	no motif/spacing effect	-0.42549727092388245	na
BALB	no motif/spacing effect	-0.06608919045777245	na
BALB	no motif/spacing effect	-0.9329668157393662	na
BALB	no motif/spacing effect	-1.3306799886150413	na
BALB	no motif/spacing effect	-1.0903668743251531	na
BALB	no motif/spacing effect	-0.8437029620219829	na
BALB	no motif/spacing effect	0.18903382439001712	na
BALB	no motif/spacing effect	-0.6168929896125972	na
BALB	no motif/spacing effect	-0.30089439501516546	na
BALB	no motif/spacing effect	0.7630953259908599	na
BALB	no motif/spacing effect	1.6652298405672918	na
BALB	no motif/spacing effect	0.5609570377103668	na
BALB	no motif/spacing effect	-0.9886846867721657	na
BALB	no motif/spacing effect	-1.0985905735885937	na
BALB	no motif/spacing effect	0.18903382439001712	na
BALB	no motif/spacing effect	-0.5494978200663527	na
BALB	no motif/spacing effect	0.0023496667097568924	na
BALB	no motif/spacing effect	-0.3710415954521604	na
BALB	no motif/spacing effect	0.0	na
BALB	no motif/spacing effect	-0.5822013610440995	na
BALB	no motif/spacing effect	0.10524316002733669	na
BALB	no motif/spacing effect	-0.3816343410116303	na
BALB	no motif/spacing effect	0.0	na
BALB	no motif/spacing effect	0.35614381022527536	na
BALB	no motif/spacing effect	-0.5313814605163121	na
BALB	no motif/spacing effect	0.0	na
BALB	no motif/spacing effect	0.18903382439001712	na
BALB	no motif/spacing effect	-0.04492587088151634	na
BALB	no motif/spacing effect	-0.4757539239392301	na
BALB	no motif/spacing effect	-0.8682943207881779	na
BALB	no motif/spacing effect	-0.40551472516033704	na
BALB	no motif/spacing effect	0.24592313731444726	na
BALB	no motif/spacing effect	0.5654926365229311	na
BALB	no motif/spacing effect	0.1296352804165956	na
BALB	no motif/spacing effect	-0.6984914463515703	na
BALB	no motif/spacing effect	-0.8875252707415875	na
BALB	no motif/spacing effect	0.1296352804165956	na
BALB	no motif/spacing effect	-0.03747470541866263	na
BALB	no motif/spacing effect	0.12398871727545369	na
BALB	no motif/spacing effect	0.8722226787376961	na
BALB	no motif/spacing effect	-0.5907958648346421	na
BALB	no motif/spacing effect	0.08365792904690939	na
BALB	no motif/spacing effect	-0.4425182357009507	na
BALB	no motif/spacing effect	-0.4790938656143333	na
BALB	no motif/spacing effect	0.18903382439001712	na
BALB	no motif/spacing effect	-0.22524504715151217	na
BALB	no motif/spacing effect	0.26790087461775247	na
BALB	no motif/spacing effect	0.1312828386453493	na
BALB	no motif/spacing effect	0.343541907993425	na
BALB	no motif/spacing effect	-0.11352894563041438	na
BALB	no motif/spacing effect	0.0	na
BALB	no motif/spacing effect	-0.26244925269622854	na
BALB	no motif/spacing effect	-0.15403362867242087	na
BALB	no motif/spacing effect	-0.3201568300351698	na
BALB	no motif/spacing effect	-0.84799690655495	na
BALB	no motif/spacing effect	0.005559525341900962	na
BALB	no motif/spacing effect	0.0	na
BALB	no motif/spacing effect	0.0	na
BALB	no motif/spacing effect	-0.22650852980867975	na
BALB	no motif/spacing effect	0.13795727278367664	na
BALB	no motif/spacing effect	0.21931302840447586	na
BALB	no motif/spacing effect	0.547207578725738	na
BALB	no motif/spacing effect	-0.7954362320768391	na
BALB	no motif/spacing effect	0.18903382439001712	na
BALB	no motif/spacing effect	-0.6650360924190273	na
BALB	no motif/spacing effect	-1.6633625041262081	na
BALB	no motif/spacing effect	-0.8062976152745622	na
BALB	no motif/spacing effect	-0.4486682771601238	na
BALB	no motif/spacing effect	-0.473515964544573	na
BALB	no motif/spacing effect	-0.9953566260498987	na
BALB	no motif/spacing effect	-0.672168620964201	na
BALB	no motif/spacing effect	-0.298994598317913	na
BALB	no motif/spacing effect	-0.5267478867758602	na
BALB	no motif/spacing effect	0.18903382439001712	na
BALB	no motif/spacing effect	-0.06608919045777245	na
BALB	no motif/spacing effect	0.0	na
BALB	no motif/spacing effect	-0.6250399400964914	na
BALB	no motif/spacing effect	-0.4497164638040858	na
BALB	no motif/spacing effect	-0.03747470541866263	na
BALB	no motif/spacing effect	0.1707468157857479	na
BALB	no motif/spacing effect	0.18080112678153748	na
BALB	no motif/spacing effect	0.4202177383845238	na
BALB	no motif/spacing effect	0.3075206710663365	na
BALB	no motif/spacing effect	0.6686204297680657	na
BALB	no motif/spacing effect	-0.9677812639496701	na
BALB	no motif/spacing effect	-0.8253214685870529	na
BALB	no motif/spacing effect	0.18903382439001712	na
BALB	no motif/spacing effect	0.0	na
BALB	no motif/spacing effect	0.0	na
BALB	no motif/spacing effect	-0.6582114827517946	na
BALB	no motif/spacing effect	-0.40551472516033704	na
BALB	no motif/spacing effect	0.22782826577339232	na
BALB	no motif/spacing effect	-0.1716113780701991	na
BALB	no motif/spacing effect	-0.45451178234385514	na
BALB	no motif/spacing effect	-0.3923174227787603	na
BALB	no motif/spacing effect	-0.088657619820397	na
BALB	no motif/spacing effect	0.6183656589883697	na
BALB	no motif/spacing effect	0.0	na
BALB	no motif/spacing effect	-0.03747470541866263	na
BALB	no motif/spacing effect	0.025535092107137447	na
BALB	no motif/spacing effect	-0.06608919045777245	na
BALB	no motif/spacing effect	0.6686204297680657	na
BALB	no motif/spacing effect	0.4652922700585397	na
BALB	no motif/spacing effect	-0.4180275418846553	na
BALB	no motif/spacing effect	-0.088657619820397	na
BALB	no motif/spacing effect	-0.5134924655403124	na
BALB	no motif/spacing effect	-0.451208264170913	na
BALB	no motif/spacing effect	-0.5251118906786765	na
BALB	no motif/spacing effect	-0.3793380274240503	na
BALB	no motif/spacing effect	-0.8258166717061717	na
BALB	no motif/spacing effect	-0.8348129175643507	na
BALB	no motif/spacing effect	-1.0922875900480458	na
BALB	no motif/spacing effect	-0.4657361954915067	na
BALB	no motif/spacing effect	0.5474877953024934	na
BALB	no motif/spacing effect	0.0	na
BALB	no motif/spacing effect	-0.03747470541866263	na
BALB	no motif/spacing effect	-1.5260688116675876	na
BALB	no motif/spacing effect	0.0	na
BALB	no motif/spacing effect	-0.210048124203841	na
BALB	no motif/spacing effect	-0.9341753640404091	na
BALB	no motif/spacing effect	-0.3572811927227697	na
BALB	no motif/spacing effect	-1.391840924098573	na
BALB	no motif/spacing effect	-0.5239944834297292	na
BALB	no motif/spacing effect	-0.8698227530597764	na
BALB	no motif/spacing effect	-1.951744831392779	na
BALB	no motif/spacing effect	-0.012539195660346003	na
BALB	no motif/spacing effect	-0.5871335997627831	na
BALB	no motif/spacing effect	0.6348245323579276	na
BALB	no motif/spacing effect	-0.28900498470005287	na
BALB	no motif/spacing effect	-0.7902814086986629	na
BALB	no motif/spacing effect	-0.8637479383464588	na
BALB	no motif/spacing effect	-0.9817102314352084	na
BALB	no motif/spacing effect	-0.9678878148462471	na
BALB	no motif/spacing effect	-1.267664537501119	na
BALB	no motif/spacing effect	-0.9476172577311797	na
BALB	no motif/spacing effect	-0.08636975239323164	na
BALB	no motif/spacing effect	-0.01946986419822494	na
BALB	no motif/spacing effect	0.3972481858353154	na
BALB	no motif/spacing effect	0.11417101991931133	na
BALB	no motif/spacing effect	-0.3008664793595326	na
BALB	no motif/spacing effect	0.9785686194684886	na
BALB	no motif/spacing effect	0.471212967950541	na
BALB	no motif/spacing effect	0.6959280881814869	na
BALB	no motif/spacing effect	-0.088657619820397	na
BALB	no motif/spacing effect	-1.57650092197296	na
BALB	no motif/spacing effect	0.0	na
BALB	no motif/spacing effect	-0.22650852980867975	na
BALB	no motif/spacing effect	-0.2331991762930307	na
BALB	no motif/spacing effect	0.28239973070072466	na
BALB	no motif/spacing effect	0.0	na
BALB	no motif/spacing effect	0.0	na
BALB	no motif/spacing effect	0.31543508218551075	na
BALB	no motif/spacing effect	1.0325074265792926	na
BALB	no motif/spacing effect	-0.2839955395481222	na
BALB	no motif/spacing effect	1.2156880466063948	na
BALB	no motif/spacing effect	-0.18057224564182084	na
BALB	no motif/spacing effect	-0.42104800072951454	na
BALB	no motif/spacing effect	0.5058909297299572	na
BALB	no motif/spacing effect	-0.11174835765245561	na
BALB	no motif/spacing effect	-0.06608919045777245	na
BALB	no motif/spacing effect	0.14914343930580953	na
BALB	no motif/spacing effect	0.0	na
BALB	no motif/spacing effect	0.6877870599458493	na
BALB	no motif/spacing effect	-0.8909694070814833	na
BALB	no motif/spacing effect	0.24430719776488852	na
BALB	no motif/spacing effect	0.0	na
BALB	no motif/spacing effect	-1.01435529297707	na
BALB	no motif/spacing effect	0.0	na
BALB	no motif/spacing effect	-0.2583119955913906	na
BALB	no motif/spacing effect	0.0	na
BALB	no motif/spacing effect	-0.5084643632471129	na
BALB	no motif/spacing effect	-0.7090083646184264	na
BALB	no motif/spacing effect	-0.3728092638895464	na
BALB	no motif/spacing effect	0.18903382439001712	na
BALB	no motif/spacing effect	0.0	na
BALB	no motif/spacing effect	-0.2512735413235765	na
BALB	no motif/spacing effect	-0.7163901636062673	na
BALB	no motif/spacing effect	0.0	na
BALB	no motif/spacing effect	-1.3667823306716231	na
BALB	no motif/spacing effect	0.0	na
BALB	no motif/spacing effect	0.0	na
BALB	no motif/spacing effect	-0.5358679511929865	na
BALB	no motif/spacing effect	-0.3581169516874696	na
BALB	no motif/spacing effect	-1.0786599436432445	na
BALB	no motif/spacing effect	-0.19430366602416038	na
BALB	no motif/spacing effect	-1.1188953490869964	na
BALB	no motif/spacing effect	0.43484172210291394	na
BALB	no motif/spacing effect	-0.7520724865564145	na
BALB	no motif/spacing effect	-1.2553943436316621	na
BALB	no motif/spacing effect	-0.4455244208102227	na
BALB	no motif/spacing effect	0.04782852509061519	na
BALB	no motif/spacing effect	0.5528503155674036	na
BALB	no motif/spacing effect	-0.22650852980867975	na
BALB	no motif/spacing effect	0.5856522903785182	na
BALB	no motif/spacing effect	-0.6942922575709682	na
BALB	no motif/spacing effect	0.41325087980482933	na
BALB	no motif/spacing effect	-0.029901485713861975	na
BALB	no motif/spacing effect	-0.6780719051126378	na
BALB	no motif/spacing effect	-1.0144995696951151	na
BALB	no motif/spacing effect	-0.002649578413949527	na
BALB	no motif/spacing effect	-0.24340559908486115	na
BALB	no motif/spacing effect	-0.6115137184097339	na
BALB	no motif/spacing effect	-0.8469499580032789	na
BALB	no motif/spacing effect	-0.6675595867996795	na
BALB	no motif/spacing effect	0.0	na
BALB	no motif/spacing effect	0.24430719776488852	na
BALB	no motif/spacing effect	-0.7389961293935772	na
BALB	no motif/spacing effect	0.1671099858352587	na
BALB	no motif/spacing effect	-0.7738993469885349	na
BALB	no motif/spacing effect	-0.9418970454364315	na
BALB	no motif/spacing effect	-0.7807495654754346	na
BALB	no motif/spacing effect	-0.03531248068668624	na
BALB	no motif/spacing effect	-0.2521186283546102	na
BALB	no motif/spacing effect	-1.1034633199440549	na
BALB	no motif/spacing effect	-0.22650852980867975	na
BALB	no motif/spacing effect	0.5289778909439846	na
BALB	no motif/spacing effect	-0.7455897575813788	na
BALB	no motif/spacing effect	0.18903382439001712	na
BALB	no motif/spacing effect	0.35614381022527536	na
BALB	no motif/spacing effect	-0.5507675808375594	na
BALB	no motif/spacing effect	0.6008455423278112	na
BALB	no motif/spacing effect	-0.24597924165406382	na
BALB	no motif/spacing effect	-0.7967468224916232	na
BALB	no motif/spacing effect	0.2032531775083768	na
BALB	no motif/spacing effect	0.0	na
BALB	no motif/spacing effect	0.0	na
BALB	no motif/spacing effect	0.32476339558550005	na
BALB	no motif/spacing effect	-1.3370349872775704	na
BALB	no motif/spacing effect	-0.15049162652745052	na
BALB	no motif/spacing effect	-0.15403362867242087	na
BALB	no motif/spacing effect	-0.7335670177043412	na
BALB	no motif/spacing effect	-0.04551465925236875	na
BALB	no motif/spacing effect	0.08365792904690939	na
BALB	no motif/spacing effect	-0.23840473932507883	na
BALB	no motif/spacing effect	0.10524316002733669	na
BALB	no motif/spacing effect	-0.26719203130745006	na
BALB	no motif/spacing effect	-0.3933786181490708	na
BALB	no motif/spacing effect	-1.1699250014423122	na
BALB	no motif/spacing effect	-0.13488282359079928	na
BALB	no motif/spacing effect	-0.3223206115653081	na
BALB	no motif/spacing effect	-0.32930762525295965	na
BALB	no motif/spacing effect	-1.1287698154072525	na
BALB	no motif/spacing effect	-0.22650852980867975	na
BALB	no motif/spacing effect	-0.3968485529653205	na
BALB	no motif/spacing effect	0.39821988121857	na
BALB	no motif/spacing effect	0.5058909297299572	na
BALB	no motif/spacing effect	-0.7747870596011732	na
BALB	no motif/spacing effect	-0.24597924165406382	na
BALB	no motif/spacing effect	0.21931302840447586	na
BALB	no motif/spacing effect	-0.3332730684813714	na
BALB	no motif/spacing effect	0.0	na
BALB	no motif/spacing effect	0.27938239992127745	na
BALB	no motif/spacing effect	0.1487353796111388	na
BALB	no motif/spacing effect	-0.5480629179096268	na
BALB	no motif/spacing effect	-1.0812696972495117	na
BALB	no motif/spacing effect	0.26178585963653456	na
BALB	no motif/spacing effect	0.893084796083488	na
BALB	no motif/spacing effect	-0.7092988515499457	na
BALB	no motif/spacing effect	-0.24035896786589694	na
BALB	no motif/spacing effect	-0.40551472516033704	na
BALB	no motif/spacing effect	-1.1699250014423122	na
BALB	no motif/spacing effect	-0.8677848046109271	na
BALB	no motif/spacing effect	-0.7686362059040173	na
BALB	no motif/spacing effect	0.022026306329999024	na
BALB	no motif/spacing effect	-0.4044682575686567	na
BALB	no motif/spacing effect	0.4941562163964468	na
BALB	no motif/spacing effect	-0.906407199711589	na
BALB	no motif/spacing effect	-0.23840473932507883	na
BALB	no motif/spacing effect	-1.548062917909627	na
BALB	no motif/spacing effect	-0.24257030327407847	na
BALB	no motif/spacing effect	-1.2526654324502484	na
BALB	no motif/spacing effect	-0.22650852980867975	na
BALB	no motif/spacing effect	0.18903382439001712	na
BALB	no motif/spacing effect	-0.5507675808375594	na
BALB	no motif/spacing effect	0.18903382439001712	na
BALB	no motif/spacing effect	0.0	na
BALB	no motif/spacing effect	0.8875252707415875	na
BALB	no motif/spacing effect	-0.4222330006830478	na
BALB	no motif/spacing effect	-0.2056279551266833	na
BALB	no motif/spacing effect	-0.126469342431065	na
BALB	no motif/spacing effect	0.6143463075022506	na
BALB	no motif/spacing effect	-0.20836046747605863	na
BALB	no motif/spacing effect	-0.5945485495503542	na
BALB	no motif/spacing effect	0.0	na
BALB	no motif/spacing effect	0.3060741436865251	na
BALB	no motif/spacing effect	0.35614381022527536	na
BALB	no motif/spacing effect	-0.03747470541866263	na
BALB	no motif/spacing effect	0.0	na
BALB	no motif/spacing effect	0.0	na
BALB	no motif/spacing effect	0.18903382439001712	na
BALB	no motif/spacing effect	0.35614381022527536	na
BALB	no motif/spacing effect	1.478363434647673	na
BALB	no motif/spacing effect	0.1370687619115616	na
BALB	no motif/spacing effect	1.418583077472566	na
BALB	no motif/spacing effect	0.12270299151970665	na
BALB	no motif/spacing effect	-0.8919120321325325	na
BALB	no motif/spacing effect	-0.7321525954040737	na
BALB	no motif/spacing effect	-0.03747470541866263	na
BALB	no motif/spacing effect	-0.6642965264679738	na
BALB	no motif/spacing effect	-0.14532302820923437	na
BALB	no motif/spacing effect	-0.0270735903254411	na
BALB	no motif/spacing effect	0.6689953687883556	na
BALB	no motif/spacing effect	1.1826922975161902	na
BALB	no motif/spacing effect	0.35614381022527536	na
BALB	no motif/spacing effect	0.35614381022527536	na
BALB	no motif/spacing effect	-0.4222330006830478	na
BALB	no motif/spacing effect	0.18903382439001712	na
BALB	no motif/spacing effect	0.35614381022527536	na
BALB	no motif/spacing effect	0.4150374992788439	na
BALB	no motif/spacing effect	0.1296352804165956	na
BALB	no motif/spacing effect	-0.24597924165406382	na
BALB	no motif/spacing effect	-0.1508419706130466	na
BALB	no motif/spacing effect	-0.21461507074472852	na
BALB	no motif/spacing effect	0.09693387836263456	na
BALB	no motif/spacing effect	-0.3076469427910169	na
BALB	no motif/spacing effect	0.5206476872394425	na
BALB	no motif/spacing effect	-0.5594274086140185	na
BALB	no motif/spacing effect	-0.4222330006830478	na
BALB	no motif/spacing effect	-0.9341753640404091	na
BALB	no motif/spacing effect	-0.2331991762930307	na
BALB	no motif/spacing effect	-0.5594274086140185	na
BALB	no motif/spacing effect	-0.22522401211961052	na
BALB	no motif/spacing effect	0.025535092107137447	na
BALB	no motif/spacing effect	0.16106243273251608	na
BALB	no motif/spacing effect	0.8165961635750163	na
BALB	no motif/spacing effect	-0.3076469427910169	na
BALB	no motif/spacing effect	0.1297678749703297	na
BALB	no motif/spacing effect	-0.2010286615351493	na
BALB	no motif/spacing effect	1.0485801804450616	na
BALB	no motif/spacing effect	-1.0757200848633457	na
BALB	no motif/spacing effect	-0.010686678797247495	na
BALB	no motif/spacing effect	0.15448225577998764	na
BALB	no motif/spacing effect	-0.1452834956386817	na
BALB	no motif/spacing effect	-0.3093605320036188	na
BALB	no motif/spacing effect	-1.3905976764303007	na
BALB	no motif/spacing effect	-0.5822013610440995	na
BALB	no motif/spacing effect	-0.008303303731209688	na
BALB	no motif/spacing effect	0.042890872677433745	na
BALB	no motif/spacing effect	0.0	na
BALB	no motif/spacing effect	-0.40151351664389523	na
BALB	no motif/spacing effect	0.0	na
BALB	no motif/spacing effect	0.0	na
BALB	no motif/spacing effect	0.18903382439001712	na
BALB	no motif/spacing effect	-0.22650852980867975	na
BALB	no motif/spacing effect	-0.24597924165406382	na
BALB	no motif/spacing effect	0.0	na
BALB	no motif/spacing effect	0.0	na
BALB	no motif/spacing effect	0.0	na
BALB	no motif/spacing effect	1.0908534304511135	na
BALB	no motif/spacing effect	0.21931302840447586	na
BALB	no motif/spacing effect	0.0	na
BALB	no motif/spacing effect	0.18271911365836502	na
BALB	no motif/spacing effect	-0.24257030327407847	na
BALB	no motif/spacing effect	0.0	na
BALB	no motif/spacing effect	-0.31292406110338256	na
BALB	no motif/spacing effect	-0.2556005540629567	na
BALB	no motif/spacing effect	-0.22650852980867975	na
BALB	no motif/spacing effect	-0.22650852980867975	na
BALB	no motif/spacing effect	-0.6398947259752217	na
BALB	no motif/spacing effect	-0.27151975424172736	na
BALB	no motif/spacing effect	-0.3923174227787603	na
BALB	no motif/spacing effect	-0.3357137706634292	na
BALB	no motif/spacing effect	0.3715207771843425	na
BALB	no motif/spacing effect	-0.3474742154662094	na
BALB	no motif/spacing effect	-0.03747470541866263	na
BALB	no motif/spacing effect	0.046997479537169484	na
BALB	no motif/spacing effect	-0.2331991762930307	na
BALB	no motif/spacing effect	0.17259015384183218	na
BALB	no motif/spacing effect	-0.3161817291487914	na
BALB	no motif/spacing effect	0.4108456463320178	na
BALB	no motif/spacing effect	0.18903382439001712	na
BALB	no motif/spacing effect	-0.3649968167792481	na
BALB	no motif/spacing effect	-0.40551472516033704	na
BALB	no motif/spacing effect	0.0	na
BALB	no motif/spacing effect	-0.088657619820397	na
BALB	no motif/spacing effect	0.6415460290875237	na
BALB	no motif/spacing effect	-0.36089544769245396	na
BALB	no motif/spacing effect	0.37669118762936105	na
BALB	no motif/spacing effect	-1.393284700750556	na
BALB	no motif/spacing effect	0.5058909297299572	na
BALB	no motif/spacing effect	-0.22672070644571019	na
BALB	no motif/spacing effect	0.3181514041418789	na
BALB	no motif/spacing effect	0.27938239992127745	na
BALB	no motif/spacing effect	-0.3365634412557592	na
BALB	no motif/spacing effect	-0.1508419706130466	na
BALB	no motif/spacing effect	-0.5145731728297585	na
BALB	no motif/spacing effect	-0.23644962024283167	na
BALB	no motif/spacing effect	-0.44434135951767484	na
BALB	no motif/spacing effect	-0.07809850288862297	na
BALB	no motif/spacing effect	0.5347982008937926	na
BALB	no motif/spacing effect	-0.6966452897707285	na
BALB	no motif/spacing effect	0.8151167752135371	na
BALB	no motif/spacing effect	0.7026549392505879	na
BALB	no motif/spacing effect	0.41303681245025325	na
BALB	no motif/spacing effect	-0.45810622117072963	na
BALB	no motif/spacing effect	-0.06608919045777245	na
BALB	no motif/spacing effect	0.08365792904690939	na
BALB	no motif/spacing effect	0.0	na
BALB	no motif/spacing effect	-0.26546114322833403	na
BALB	no motif/spacing effect	-0.19793937761190894	na
BALB	no motif/spacing effect	-1.8950304403984572	na
BALB	no motif/spacing effect	0.0	na
BALB	no motif/spacing effect	-0.6250399400964914	na
BALB	no motif/spacing effect	-0.14532302820923437	na
BALB	no motif/spacing effect	0.18903382439001712	na
BALB	no motif/spacing effect	0.0	na
BALB	no motif/spacing effect	-1.6342210780093134	na
BALB	no motif/spacing effect	-1.0424207564460564	na
BALB	no motif/spacing effect	-0.5786302518974398	na
BALB	no motif/spacing effect	-0.7698643810321282	na
BALB	no motif/spacing effect	-0.555778114823779	na
BALB	no motif/spacing effect	0.203328159709526	na
BALB	no motif/spacing effect	0.203328159709526	na
BALB	no motif/spacing effect	1.1651557572944402	na
BALB	no motif/spacing effect	-0.393284700750556	na
BALB	no motif/spacing effect	-0.26833843769372123	na
BALB	no motif/spacing effect	-0.6027299055890594	na
BALB	no motif/spacing effect	-0.3813432140368924	na
BALB	no motif/spacing effect	0.1707468157857479	na
BALB	no motif/spacing effect	-0.3219280948873622	na
BALB	no motif/spacing effect	-0.3728092638895464	na
BALB	no motif/spacing effect	-0.48137999410753984	na
BALB	no motif/spacing effect	-0.48137999410753984	na
BALB	no motif/spacing effect	-0.6348877260528389	na
BALB	no motif/spacing effect	0.1296352804165956	na
BALB	no motif/spacing effect	0.0	na
BALB	no motif/spacing effect	0.6364574264491192	na
BALB	no motif/spacing effect	-0.4352153812164741	na
BALB	no motif/spacing effect	-0.8316687366509496	na
BALB	no motif/spacing effect	0.332174979700123	na
BALB	no motif/spacing effect	-1.4487415461351993	na
BALB	no motif/spacing effect	-0.6216453535203641	na
BALB	no motif/spacing effect	0.0	na
BALB	no motif/spacing effect	-0.4222330006830478	na
BALB	no motif/spacing effect	-0.16646114613874063	na
BALB	no motif/spacing effect	-0.15527822547791126	na
BALB	no motif/spacing effect	0.5474877953024934	na
BALB	no motif/spacing effect	-0.08478347210209414	na
BALB	no motif/spacing effect	-0.05013343347464394	na
BALB	no motif/spacing effect	-0.2654611432283338	na
BALB	no motif/spacing effect	0.5201225684314874	na
BALB	no motif/spacing effect	-0.11352894563041438	na
BALB	no motif/spacing effect	-0.22650852980867975	na
BALB	no motif/spacing effect	-1.1204434703132855	na
BALB	no motif/spacing effect	-1.476149013582231	na
BALB	no motif/spacing effect	-0.4671074406531188	na
BALB	no motif/spacing effect	0.1154772174199361	na
BALB	no motif/spacing effect	-1.1596126270061748	na
BALB	no motif/spacing effect	-0.45810622117072963	na
BALB	no motif/spacing effect	0.14982768683653358	na
BALB	no motif/spacing effect	0.06402491193529691	na
BALB	no motif/spacing effect	-0.10121225135829803	na
BALB	no motif/spacing effect	-0.7179363659905769	na
BALB	no motif/spacing effect	-0.4513793463425646	na
BALB	no motif/spacing effect	-0.9167444963506477	na
BALB	no motif/spacing effect	-0.7685168425926951	na
BALB	no motif/spacing effect	0.0	na
BALB	no motif/spacing effect	0.5496870259736251	na
BALB	no motif/spacing effect	0.5058909297299572	na
BALB	no motif/spacing effect	0.024384158626959085	na
BALB	no motif/spacing effect	-0.7023481854390212	na
BALB	no motif/spacing effect	-0.3573617883819469	na
BALB	no motif/spacing effect	0.20688700051817444	na
BALB	no motif/spacing effect	-0.44555155100893895	na
BALB	no motif/spacing effect	0.0	na
BALB	no motif/spacing effect	0.03873239448871413	na
BALB	no motif/spacing effect	-0.15403362867242087	na
BALB	no motif/spacing effect	0.009642108010406325	na
BALB	no motif/spacing effect	-0.9418970454364315	na
BALB	no motif/spacing effect	-0.5333003808986634	na
BALB	no motif/spacing effect	-0.24306598960119752	na
BALB	no motif/spacing effect	-0.2594940481285457	na
BALB	no motif/spacing effect	0.0	na
BALB	no motif/spacing effect	0.0	na
BALB	no motif/spacing effect	0.18903382439001712	na
BALB	no motif/spacing effect	-1.0201778819376304	na
BALB	no motif/spacing effect	0.3517633244281253	na
BALB	no motif/spacing effect	-0.3397760962202867	na
BALB	no motif/spacing effect	-0.4103370691091279	na
BALB	no motif/spacing effect	-0.4994978523676594	na
BALB	no motif/spacing effect	0.2850913267069908	na
BALB	no motif/spacing effect	-0.03997461081092757	na
BALB	no motif/spacing effect	0.5521311082537839	na
BALB	no motif/spacing effect	-0.0034363534489307845	na
BALB	no motif/spacing effect	-0.9622153375405298	na
BALB	no motif/spacing effect	-0.09846263888568818	na
BALB	no motif/spacing effect	0.33614195410706316	na
BALB	no motif/spacing effect	-0.5055863204029256	na
BALB	no motif/spacing effect	-0.9004643264490857	na
BALB	no motif/spacing effect	0.18903382439001712	na
BALB	no motif/spacing effect	-0.9766423115793725	na
BALB	no motif/spacing effect	-0.4922521269063822	na
BALB	no motif/spacing effect	0.18903382439001712	na
BALB	no motif/spacing effect	0.0	na
BALB	no motif/spacing effect	0.0	na
BALB	no motif/spacing effect	-0.6952639393211744	na
BALB	no motif/spacing effect	0.0	na
BALB	no motif/spacing effect	-0.5594274086140185	na
BALB	no motif/spacing effect	0.27938239992127745	na
BALB	no motif/spacing effect	-0.5492135957520201	na
BALB	no motif/spacing effect	-0.6055308028432944	na
BALB	no motif/spacing effect	0.26860023951465406	na
BALB	no motif/spacing effect	0.24430719776488852	na
BALB	no motif/spacing effect	-0.16925970512390975	na
BALB	no motif/spacing effect	-0.7967385431553677	na
BALB	no motif/spacing effect	0.5110241057486871	na
BALB	no motif/spacing effect	0.1296352804165956	na
BALB	no motif/spacing effect	0.0	na
BALB	no motif/spacing effect	-0.22820681728070547	na
BALB	no motif/spacing effect	0.02414608733170276	na
BALB	no motif/spacing effect	0.02055155894097549	na
BALB	no motif/spacing effect	0.08546934218934954	na
BALB	no motif/spacing effect	-0.6235509983984038	na
BALB	no motif/spacing effect	-0.19430366602416038	na
BALB	no motif/spacing effect	-0.25945451555799304	na
BALB	no motif/spacing effect	0.3517633244281253	na
BALB	no motif/spacing effect	0.4396394725119217	na
BALB	no motif/spacing effect	-0.4222330006830478	na
BALB	no motif/spacing effect	-0.4573032262558536	na
BALB	no motif/spacing effect	-0.30472321844698325	na
BALB	no motif/spacing effect	-0.393284700750556	na
BALB	no motif/spacing effect	0.40192199948858587	na
BALB	no motif/spacing effect	0.18903382439001712	na
BALB	no motif/spacing effect	-0.7484612330040357	na
BALB	no motif/spacing effect	-0.4044682575686567	na
BALB	no motif/spacing effect	-0.22650852980867975	na
BALB	no motif/spacing effect	-0.22650852980867975	na
BALB	no motif/spacing effect	0.44141291470314137	na
BALB	no motif/spacing effect	-0.4222330006830478	na
BALB	no motif/spacing effect	0.0	na
BALB	no motif/spacing effect	1.2793823999212774	na
BALB	no motif/spacing effect	-0.24597924165406382	na
BALB	no motif/spacing effect	-0.3397760962202867	na
BALB	no motif/spacing effect	-0.9872889482504462	na
BALB	no motif/spacing effect	1.7048719644563528	na
BALB	no motif/spacing effect	0.7564582100386952	na
BALB	no motif/spacing effect	-0.056413308905266524	na
BALB	no motif/spacing effect	0.0840642647884744	na
BALB	no motif/spacing effect	1.050366607210559	na
BALB	no motif/spacing effect	-0.4222330006830478	na
BALB	no motif/spacing effect	0.0	na
BALB	no motif/spacing effect	-0.4222330006830478	na
BALB	no motif/spacing effect	0.1296352804165956	na
BALB	no motif/spacing effect	0.0	na
BALB	no motif/spacing effect	-0.22650852980867975	na
BALB	no motif/spacing effect	0.08277767578445827	na
BALB	no motif/spacing effect	-0.23387191822216646	na
BALB	no motif/spacing effect	-0.5685119799405625	na
BALB	no motif/spacing effect	0.13906403773755183	na
BALB	no motif/spacing effect	-0.3923174227787603	na
BALB	no motif/spacing effect	-0.6094155444456952	na
BALB	no motif/spacing effect	-0.9124554821260427	na
BALB	no motif/spacing effect	-0.5628440947364359	na
BALB	no motif/spacing effect	-0.22650852980867975	na
BALB	no motif/spacing effect	-0.6213466512153456	na
BALB	no motif/spacing effect	-0.5594274086140185	na
BALB	no motif/spacing effect	0.10594205376771537	na
BALB	no motif/spacing effect	0.38150787571364964	na
BALB	no motif/spacing effect	1.1709861968126227	na
BALB	no motif/spacing effect	-0.22650852980867975	na
BALB	no motif/spacing effect	0.0	na
BALB	no motif/spacing effect	0.0	na
BALB	no motif/spacing effect	0.0	na
BALB	no motif/spacing effect	-0.6081422710669377	na
BALB	no motif/spacing effect	-0.8940515879044826	na
BALB	no motif/spacing effect	-0.43261435778637125	na
BALB	no motif/spacing effect	0.0	na
BALB	no motif/spacing effect	0.34239219744707783	na
BALB	no motif/spacing effect	0.0	na
BALB	no motif/spacing effect	0.0	na
BALB	no motif/spacing effect	0.0	na
BALB	no motif/spacing effect	0.0	na
BALB	no motif/spacing effect	-0.5313814605163121	na
BALB	no motif/spacing effect	0.025535092107137447	na
BALB	no motif/spacing effect	-1.0314257729691962	na
BALB	no motif/spacing effect	-0.17529515974672627	na
BALB	no motif/spacing effect	0.0	na
BALB	no motif/spacing effect	0.0	na
BALB	no motif/spacing effect	-0.23840473932507883	na
BALB	no motif/spacing effect	0.0	na
BALB	no motif/spacing effect	0.21931302840447586	na
BALB	no motif/spacing effect	0.18903382439001712	na
BALB	no motif/spacing effect	-0.5333003808986634	na
BALB	no motif/spacing effect	-0.6456252826277802	na
BALB	no motif/spacing effect	0.33614195410706316	na
BALB	no motif/spacing effect	0.2849270116826359	na
BALB	no motif/spacing effect	-0.14886338591448256	na
BALB	no motif/spacing effect	0.32014497173415	na
BALB	no motif/spacing effect	-0.09502353299393906	na
BALB	no motif/spacing effect	2.6463172273609725	na
BALB	no motif/spacing effect	1.6547136091635757	na
BALB	no motif/spacing effect	-0.005661335090426434	na
BALB	no motif/spacing effect	0.08365792904690939	na
BALB	no motif/spacing effect	-0.30795301065719993	na
BALB	no motif/spacing effect	-0.35678922161861415	na
BALB	no motif/spacing effect	-0.3230417151980709	na
BALB	no motif/spacing effect	-0.5337320815293776	na
BALB	no motif/spacing effect	0.9282642464010854	na
BALB	no motif/spacing effect	0.0	na
BALB	no motif/spacing effect	-0.4573032262558536	na
BALB	no motif/spacing effect	0.0	na
BALB	no motif/spacing effect	1.3909518807545307	na
BALB	no motif/spacing effect	0.046997479537169484	na
BALB	no motif/spacing effect	-0.5043683908237022	na
BALB	no motif/spacing effect	0.18903382439001712	na
BALB	no motif/spacing effect	0.4303291512314342	na
BALB	no motif/spacing effect	0.0	na
BALB	no motif/spacing effect	-0.22650852980867975	na
BALB	no motif/spacing effect	-0.09037443667024236	na
BALB	no motif/spacing effect	0.16046467219324612	na
BALB	no motif/spacing effect	0.43423106451215454	na
BALB	no motif/spacing effect	0.0	na
BALB	no motif/spacing effect	0.2951670267746027	na
BALB	no motif/spacing effect	0.034203424058720344	na
BALB	no motif/spacing effect	0.5609570377103668	na
BALB	no motif/spacing effect	-0.17098619681262273	na
BALB	no motif/spacing effect	-0.1697840099893888	na
BALB	no motif/spacing effect	0.0	na
BALB	no motif/spacing effect	-0.7691939270640136	na
BALB	no motif/spacing effect	-0.3992890456311393	na
BALB	no motif/spacing effect	-0.024391029666719355	na
BALB	no motif/spacing effect	0.18903382439001712	na
BALB	no motif/spacing effect	1.478363434647673	na
BALB	no motif/spacing effect	0.1296352804165956	na
BALB	no motif/spacing effect	-0.3816343410116303	na
BALB	no motif/spacing effect	0.4928682107391711	na
BALB	no motif/spacing effect	-0.0837683576925976	na
BALB	no motif/spacing effect	-1.057638625867944	na
BALB	no motif/spacing effect	-1.0354396692552923	na
BALB	no motif/spacing effect	-1.4461005069641724	na
BALB	no motif/spacing effect	0.18903382439001712	na
BALB	no motif/spacing effect	-0.6160408119065997	na
BALB	no motif/spacing effect	0.6855572921766462	na
BALB	no motif/spacing effect	-0.7807818264586956	na
BALB	no motif/spacing effect	-0.14880272387133742	na
BALB	no motif/spacing effect	-1.484735052982502	na
BALB	no motif/spacing effect	1.0135748574658066	na
BALB	no motif/spacing effect	0.04884060337239937	na
BALB	no motif/spacing effect	0.11048991986697843	na
BALB	no motif/spacing effect	0.0	na
BALB	no motif/spacing effect	-0.9922226494082804	na
BALB	no motif/spacing effect	-1.2659716889133468	na
BALB	no motif/spacing effect	-0.6582114827517946	na
BALB	no motif/spacing effect	-0.7389961293935772	na
BALB	no motif/spacing effect	-0.606167936619241	na
BALB	no motif/spacing effect	-0.6034081680419741	na
BALB	no motif/spacing effect	-0.45312327573113187	na
BALB	no motif/spacing effect	0.0	na
BALB	no motif/spacing effect	-0.8253214685870529	na
BALB	no motif/spacing effect	-1.2448870591235344	na
BALB	no motif/spacing effect	-0.5935475093146199	na
BALB	no motif/spacing effect	0.005668750086692098	na
BALB	no motif/spacing effect	-0.3018268888308526	na
BALB	no motif/spacing effect	-0.19891635561064103	na
BALB	no motif/spacing effect	-0.9886846867721657	na
BALB	no motif/spacing effect	-0.4297354364560908	na
BALB	no motif/spacing effect	0.19154100270607533	na
BALB	no motif/spacing effect	-0.5654663250953593	na
BALB	no motif/spacing effect	-0.20048050815090512	na
BALB	no motif/spacing effect	-0.15926345110770557	na
BALB	no motif/spacing effect	-1.4627142026265982	na
BALB	no motif/spacing effect	-1.7108563340864307	na
BALB	no motif/spacing effect	-1.2927617063684478	na
BALB	no motif/spacing effect	-1.1262637726461726	na
BALB	no motif/spacing effect	-0.4841972356264552	na
BALB	no motif/spacing effect	-1.4226348331984453	na
BALB	no motif/spacing effect	-0.6389557748462522	na
BALB	no motif/spacing effect	-1.3401774673422198	na
BALB	no motif/spacing effect	-1.0891864559397026	na
BALB	no motif/spacing effect	-0.38348276540399895	na
BALB	no motif/spacing effect	0.5680639761477879	na
BALB	no motif/spacing effect	0.0	na
BALB	no motif/spacing effect	0.2929767211912333	na
BALB	no motif/spacing effect	-0.585604411762175	na
BALB	no motif/spacing effect	-0.48938484073892496	na
BALB	no motif/spacing effect	0.4789208633108317	na
BALB	no motif/spacing effect	-0.6642965264679738	na
BALB	no motif/spacing effect	-0.24927997153256953	na
BALB	no motif/spacing effect	-0.731698904986704	na
BALB	no motif/spacing effect	0.36299729142244264	na
BALB	no motif/spacing effect	0.5752994033704364	na
BALB	no motif/spacing effect	0.15751008661492882	na
BALB	no motif/spacing effect	0.03541402756258183	na
BALB	no motif/spacing effect	-0.5823830345577043	na
BALB	no motif/spacing effect	-0.5849625007211561	na
BALB	no motif/spacing effect	-0.056413308905266524	na
BALB	no motif/spacing effect	0.7999374504951213	na
BALB	no motif/spacing effect	0.2304838336899957	na
BALB	no motif/spacing effect	0.0	na
BALB	no motif/spacing effect	-0.6491849436754829	na
BALB	no motif/spacing effect	-0.4222330006830478	na
BALB	no motif/spacing effect	-0.24035896786589694	na
BALB	no motif/spacing effect	0.2929767211912333	na
BALB	no motif/spacing effect	-0.35206006622851693	na
BALB	no motif/spacing effect	0.025535092107137447	na
BALB	no motif/spacing effect	0.9362240895666853	na
BALB	no motif/spacing effect	0.03273678641199984	na
BALB	no motif/spacing effect	-1.756256932774966	na
BALB	no motif/spacing effect	-0.25945451555799304	na
BALB	no motif/spacing effect	0.5400809020403119	na
BALB	no motif/spacing effect	0.33614195410706316	na
BALB	no motif/spacing effect	0.3517633244281253	na
BALB	no motif/spacing effect	-0.24035896786589694	na
BALB	no motif/spacing effect	0.18903382439001712	na
BALB	no motif/spacing effect	0.6686204297680657	na
BALB	no motif/spacing effect	-0.54867838339638	na
BALB	no motif/spacing effect	0.203328159709526	na
BALB	no motif/spacing effect	-0.22650852980867975	na
BALB	no motif/spacing effect	-0.22650852980867975	na
BALB	no motif/spacing effect	-0.03747470541866263	na
BALB	no motif/spacing effect	-0.40551472516033704	na
BALB	no motif/spacing effect	-0.6642965264679738	na
BALB	no motif/spacing effect	0.0	na
BALB	no motif/spacing effect	0.1296352804165956	na
BALB	no motif/spacing effect	0.0	na
BALB	no motif/spacing effect	-0.22650852980867975	na
BALB	no motif/spacing effect	0.18903382439001712	na
BALB	no motif/spacing effect	0.8643449006424337	na
BALB	no motif/spacing effect	0.18903382439001712	na
BALB	no motif/spacing effect	0.10169539706935082	na
BALB	no motif/spacing effect	-0.5594274086140185	na
BALB	no motif/spacing effect	-0.9324019218491897	na
BALB	no motif/spacing effect	-0.2556005540629567	na
BALB	no motif/spacing effect	-0.040077439375335144	na
BALB	no motif/spacing effect	-0.4041636656268688	na
BALB	no motif/spacing effect	0.16833700453912015	na
BALB	no motif/spacing effect	1.0469974795371695	na
BALB	no motif/spacing effect	0.05176142768974157	na
BALB	no motif/spacing effect	0.2950991428302836	na
BALB	no motif/spacing effect	-0.4034689735606616	na
BALB	no motif/spacing effect	0.39821988121857	na
BALB	no motif/spacing effect	-0.03747470541866263	na
BALB	no motif/spacing effect	-0.22650852980867975	na
BALB	no motif/spacing effect	0.18903382439001712	na
BALB	no motif/spacing effect	-0.22650852980867975	na
BALB	no motif/spacing effect	-0.11352894563041438	na
BALB	no motif/spacing effect	0.2951670267746027	na
BALB	no motif/spacing effect	0.8702468711600719	na
BALB	no motif/spacing effect	-0.6058067545140005	na
BALB	no motif/spacing effect	-0.24591685349254178	na
BALB	no motif/spacing effect	-0.040077439375335144	na
BALB	no motif/spacing effect	1.765534746362977	na
BALB	no motif/spacing effect	0.35614381022527536	na
BALB	no motif/spacing effect	0.0	na
BALB	no motif/spacing effect	-0.48137999410753984	na
BALB	no motif/spacing effect	-0.22650852980867975	na
BALB	no motif/spacing effect	-0.5594274086140185	na
BALB	no motif/spacing effect	-1.0114565154350013	na
BALB	no motif/spacing effect	-0.22650852980867975	na
BALB	no motif/spacing effect	-0.25539434363166214	na
BALB	no motif/spacing effect	0.18903382439001712	na
BALB	no motif/spacing effect	-0.47079148080184474	na
BALB	no motif/spacing effect	0.5400809020403119	na
BALB	no motif/spacing effect	-0.7956967168732294	na
BALB	no motif/spacing effect	0.0	na
BALB	no motif/spacing effect	-1.5244451486410016	na
BALB	no motif/spacing effect	-0.023332503830623796	na
BALB	no motif/spacing effect	-0.24035896786589694	na
BALB	no motif/spacing effect	-0.3791923003321216	na
BALB	no motif/spacing effect	-0.1621361994812509	na
BALB	no motif/spacing effect	0.0	na
BALB	no motif/spacing effect	0.16833700453912015	na
BALB	no motif/spacing effect	-0.6040713236688604	na
BALB	no motif/spacing effect	-0.40551472516033704	na
BALB	no motif/spacing effect	0.21931302840447586	na
BALB	no motif/spacing effect	0.0	na
BALB	no motif/spacing effect	-0.10691520391651199	na
BALB	no motif/spacing effect	0.0	na
BALB	no motif/spacing effect	0.18903382439001712	na
BALB	no motif/spacing effect	-1.1601770248907501	na
BALB	no motif/spacing effect	0.15846509454689794	na
BALB	no motif/spacing effect	0.30663079498619394	na
BALB	no motif/spacing effect	0.7893924427631926	na
BALB	no motif/spacing effect	0.0	na
BALB	no motif/spacing effect	0.8173466937147653	na
BALB	no motif/spacing effect	-1.3659527187793608	na
BALB	no motif/spacing effect	-0.5313814605163121	na
BALB	no motif/spacing effect	-0.7636806206214746	na
BALB	no motif/spacing effect	-0.21412480535284706	na
BALB	no motif/spacing effect	1.2010976429732196	na
BALB	no motif/spacing effect	-0.7032824679099174	na
BALB	no motif/spacing effect	-0.24257030327407847	na
BALB	no motif/spacing effect	-1.8991756304805132	na
BALB	no motif/spacing effect	-0.7902814086986629	na
BALB	no motif/spacing effect	-0.06640122572250995	na
BALB	no motif/spacing effect	-0.2331991762930307	na
BALB	no motif/spacing effect	0.6686204297680657	na
BALB	no motif/spacing effect	1.8797057662822882	na
BALB	no motif/spacing effect	0.0	na
BALB	no motif/spacing effect	-0.628031222613042	na
BALB	no motif/spacing effect	0.21931302840447586	na
BALB	no motif/spacing effect	0.0	na
BALB	no motif/spacing effect	-0.33831558442612186	na
BALB	no motif/spacing effect	-0.4222330006830478	na
BALB	no motif/spacing effect	-0.9070905394853388	na
BALB	no motif/spacing effect	-0.5084643632471129	na
BALB	no motif/spacing effect	-0.9603717116525452	na
BALB	no motif/spacing effect	0.4963048809007593	na
BALB	no motif/spacing effect	-0.6139216231976063	na
BALB	no motif/spacing effect	-0.45810622117072985	na
BALB	no motif/spacing effect	-0.725454668412516	na
BALB	no motif/spacing effect	-0.7484612330040357	na
BALB	no motif/spacing effect	-1.5216365653523267	na
BALB	no motif/spacing effect	0.18903382439001712	na
BALB	no motif/spacing effect	-1.2223924213364479	na
BALB	no motif/spacing effect	-1.106308902146341	na
BALB	no motif/spacing effect	-0.06608919045777245	na
BALB	no motif/spacing effect	-0.25703566521235044	na
BALB	no motif/spacing effect	0.19921440645397093	na
BALB	no motif/spacing effect	-0.8261975282696015	na
BALB	no motif/spacing effect	0.3407053019179904	na
BALB	no motif/spacing effect	0.27938239992127745	na
BALB	no motif/spacing effect	-0.1621361994812509	na
BALB	no motif/spacing effect	0.0	na
BALB	no motif/spacing effect	-0.5945485495503542	na
BALB	no motif/spacing effect	0.2795960436184748	na
BALB	no motif/spacing effect	-0.6693654242268701	na
BALB	no motif/spacing effect	-0.5826691278557421	na
BALB	no motif/spacing effect	0.27938239992127745	na
BALB	no motif/spacing effect	0.06759807815081031	na
BALB	no motif/spacing effect	0.35614381022527536	na
BALB	no motif/spacing effect	-0.2583119955913906	na
BALB	no motif/spacing effect	0.0	na
BALB	no motif/spacing effect	-0.22650852980867975	na
BALB	no motif/spacing effect	-1.2593240864954187	na
BALB	no motif/spacing effect	-0.5974226217096232	na
BALB	no motif/spacing effect	-0.5084643632471129	na
BALB	no motif/spacing effect	1.0053731720988517	na
BALB	no motif/spacing effect	0.7662599009602444	na
BALB	no motif/spacing effect	-0.3414998393987658	na
BALB	no motif/spacing effect	0.10524316002733669	na
BALB	no motif/spacing effect	-0.8875252707415875	na
BALB	no motif/spacing effect	-0.6984914463515703	na
BALB	no motif/spacing effect	0.0	na
BALB	no motif/spacing effect	0.35614381022527536	na
BALB	no motif/spacing effect	0.203328159709526	na
BALB	no motif/spacing effect	-0.3649968167792481	na
BALB	no motif/spacing effect	-0.7724586887324105	na
BALB	no motif/spacing effect	-0.26392799213730056	na
BALB	no motif/spacing effect	-0.18597294267418252	na
BALB	no motif/spacing effect	-0.03747470541866263	na
BALB	no motif/spacing effect	0.5474877953024934	na
BALB	no motif/spacing effect	-0.9181316636653056	na
BALB	no motif/spacing effect	1.2966753029554507	na
BALB	no motif/spacing effect	-0.41786909006200634	na
BALB	no motif/spacing effect	-0.3627212973546481	na
BALB	no motif/spacing effect	-0.7708502124882433	na
BALB	no motif/spacing effect	-0.9152078204801533	na
BALB	no motif/spacing effect	-0.712901889275737	na
BALB	no motif/spacing effect	-0.41593330498343306	na
BALB	no motif/spacing effect	0.0	na
BALB	no motif/spacing effect	0.08912589047298392	na
BALB	no motif/spacing effect	0.1349893871144472	na
BALB	no motif/spacing effect	-0.33298652103239057	na
BALB	no motif/spacing effect	-0.9035602397420508	na
BALB	no motif/spacing effect	-0.6435471916567188	na
BALB	no motif/spacing effect	0.19264507794239583	na
BALB	no motif/spacing effect	0.23911161849338836	na
BALB	no motif/spacing effect	-0.300356603036541	na
BALB	no motif/spacing effect	-0.7685168425926951	na
BALB	no motif/spacing effect	0.29667530295545075	na
BALB	no motif/spacing effect	-0.4127983322285549	na
BALB	no motif/spacing effect	-0.4222330006830478	na
BALB	no motif/spacing effect	-0.3234539491183228	na
BALB	no motif/spacing effect	0.2007938264099951	na
BALB	no motif/spacing effect	-0.5641969918424499	na
BALB	no motif/spacing effect	-0.20435849850618615	na
BALB	no motif/spacing effect	-0.24035896786589694	na
BALB	no motif/spacing effect	-0.3728092638895464	na
BALB	no motif/spacing effect	-0.6984914463515703	na
BALB	no motif/spacing effect	-0.029901485713861975	na
BALB	no motif/spacing effect	-0.5087519341010376	na
BALB	no motif/spacing effect	-0.059982104828232075	na
BALB	no motif/spacing effect	-0.7902814086986629	na
BALB	no motif/spacing effect	0.0	na
BALB	no motif/spacing effect	0.5528503155674036	na
BALB	no motif/spacing effect	-0.18839175010112008	na
BALB	no motif/spacing effect	0.0	na
BALB	no motif/spacing effect	-0.6484210985743806	na
BALB	no motif/spacing effect	-0.18120306989362445	na
BALB	no motif/spacing effect	-0.11352894563041438	na
BALB	no motif/spacing effect	-0.6894566685922621	na
BALB	no motif/spacing effect	-0.0837683576925976	na
BALB	no motif/spacing effect	-0.5084643632471129	na
BALB	no motif/spacing effect	-0.44076777437226156	na
BALB	no motif/spacing effect	-0.9417498279010719	na
BALB	no motif/spacing effect	-0.33239871138820654	na
BALB	no motif/spacing effect	0.4863986662375668	na
BALB	no motif/spacing effect	0.0	na
BALB	no motif/spacing effect	-0.22650852980867975	na
BALB	no motif/spacing effect	0.35614381022527536	na
BALB	no motif/spacing effect	0.18903382439001712	na
BALB	no motif/spacing effect	-1.6381554398867495	na
BALB	no motif/spacing effect	-0.6415460290875235	na
BALB	no motif/spacing effect	-0.30042981179435424	na
BALB	no motif/spacing effect	0.08492856966694573	na
BALB	no motif/spacing effect	-0.8233554007513195	na
BALB	no motif/spacing effect	0.0	na
BALB	no motif/spacing effect	0.1296352804165956	na
BALB	no motif/spacing effect	0.13935828514646298	na
BALB	no motif/spacing effect	-0.7895012572448059	na
BALB	no motif/spacing effect	-0.5005673827469836	na
BALB	no motif/spacing effect	-0.18962625482606743	na
BALB	no motif/spacing effect	0.18271911365836502	na
BALB	no motif/spacing effect	0.7858751946471529	na
BALB	no motif/spacing effect	0.5885543340779638	na
BALB	no motif/spacing effect	-0.5360529002402097	na
BALB	no motif/spacing effect	-0.10691520391651199	na
BALB	no motif/spacing effect	-0.6929309974061368	na
BALB	no motif/spacing effect	-0.5636175983228013	na
BALB	no motif/spacing effect	-1.364448473448773	na
BALB	no motif/spacing effect	-1.6762605033704618	na
BALB	no motif/spacing effect	0.5705354300858764	na
BALB	no motif/spacing effect	-0.3001133564452818	na
BALB	no motif/spacing effect	0.35614381022527536	na
BALB	no motif/spacing effect	-0.03747470541866263	na
BALB	no motif/spacing effect	0.1296352804165956	na
BALB	no motif/spacing effect	-0.19033121210414938	na
BALB	no motif/spacing effect	0.0	na
BALB	no motif/spacing effect	-0.205600733046309	na
BALB	no motif/spacing effect	0.18903382439001712	na
BALB	no motif/spacing effect	0.18903382439001712	na
BALB	no motif/spacing effect	-0.2331991762930307	na
BALB	no motif/spacing effect	-0.24597924165406382	na
BALB	no motif/spacing effect	0.1296352804165956	na
BALB	no motif/spacing effect	-0.5654663250953593	na
BALB	no motif/spacing effect	-0.2689019065498126	na
BALB	no motif/spacing effect	-0.2686914568912253	na
BALB	no motif/spacing effect	-0.5438090129243949	na
BALB	no motif/spacing effect	-0.5959935378454491	na
BALB	no motif/spacing effect	-0.48137999410753984	na
BALB	no motif/spacing effect	0.1381022766287885	na
BALB	no motif/spacing effect	0.27938239992127745	na
BALB	no motif/spacing effect	-0.1581917270700588	na
BALB	no motif/spacing effect	-0.6448390808606974	na
BALB	no motif/spacing effect	-0.0050948671227635245	na
BALB	no motif/spacing effect	0.44111292661360446	na
BALB	no motif/spacing effect	0.510615159261075	na
BALB	no motif/spacing effect	0.8137413647172651	na
BALB	no motif/spacing effect	0.0519946376382614	na
BALB	no motif/spacing effect	-0.3986043457246602	na
BALB	no motif/spacing effect	0.37389622595807204	na
BALB	no motif/spacing effect	1.282638963773305	na
BALB	no motif/spacing effect	-0.8020606223880911	na
BALB	no motif/spacing effect	-1.0499252253316826	na
BALB	no motif/spacing effect	-0.4922521269063822	na
BALB	no motif/spacing effect	-1.0931094043914817	na
BALB	no motif/spacing effect	0.0	na
BALB	no motif/spacing effect	-0.06219476160734416	na
BALB	no motif/spacing effect	-0.6285976295304856	na
BALB	no motif/spacing effect	-0.9130643632287193	na
[truncated: 74,553 more rows]
