# Supplementary material for: Systematic analysis of naturally occurring insertions and deletions that alter transcription factor spacing identifies tolerant and sensitive transcription factor pairs
Source: eLife. 2022 Jan 20;11:e70878. doi: 10.7554/eLife.70878 (PMC8809895; doi:10.7554/eLife.70878)
Supplement: Figure 3—source data 4. [file elife-70878-fig3-data4.csv]

strain	group	Log2 H3K27Ac fold change	Change of PWM score or spacing
BALB	mutated PU.1 motif	-0.5004577950216476	3.3483290000000014
BALB	mutated PU.1 motif	-0.4719970374160276	-3.639792
BALB	mutated PU.1 motif	-3.5171706897493733	-4.719585999999998
BALB	mutated PU.1 motif	0.5959202857475412	-5.4834369999999995
BALB	mutated PU.1 motif	-0.3136272909937783	-6.5480979999999995
BALB	mutated PU.1 motif	-0.7269893510816976	-3.0432159999999975
BALB	mutated PU.1 motif	-0.5073703435456114	-6.658211400000002
BALB	mutated PU.1 motif	3.7623356087468878	6.658213
BALB	mutated PU.1 motif	-0.16006774673223845	3.7944226
BALB	mutated PU.1 motif	0.24621929545858423	-2.4774650000000005
BALB	mutated PU.1 motif	-0.46388798880312	3.4529404999999986
BALB	mutated PU.1 motif	2.145885833441178	3.6397924999999995
BALB	mutated PU.1 motif	0.7878007627609676	2.3197829999999993
BALB	mutated PU.1 motif	2.2764702076544756	2.1461360000000003
BALB	mutated PU.1 motif	1.462150095116963	2.057546500000001
BALB	mutated PU.1 motif	0.8536555500903236	-6.020700999999997
BALB	mutated PU.1 motif	-0.5150943776912396	-3.6212190000000017
BALB	mutated PU.1 motif	-0.6878435189848764	-3.1658299999999997
BALB	mutated PU.1 motif	-1.654948373344736	-3.7140379999999986
BALB	mutated PU.1 motif	0.25108430328425557	-3.5432360000000003
BALB	mutated PU.1 motif	-0.15101392985409579	3.8131717000000016
BALB	mutated PU.1 motif	-0.33102069757164276	3.6805290000000017
BALB	mutated PU.1 motif	-0.13920898122899716	-8.3822802
BALB	mutated PU.1 motif	0.4036829409131544	-3.452940999999999
BALB	mutated PU.1 motif	0.7886822935284266	2.3176184000000006
BALB	mutated PU.1 motif	-0.08080217982610272	-2.1069770000000005
BALB	mutated PU.1 motif	1.6969010971840681	6.658211999999997
BALB	mutated PU.1 motif	-1.1592570604786134	2.1178880000000007
BALB	mutated PU.1 motif	4.1680958662159115	6.548099
BALB	mutated PU.1 motif	-2.0043683025083103	-4.411154299999999
BALB	mutated PU.1 motif	-2.550420715760228	-2.4774645
BALB	mutated PU.1 motif	2.265451330011082	2.2419469999999997
BALB	mutated PU.1 motif	-2.4076701909475564	-6.947585699999999
BALB	mutated PU.1 motif	-1.3113299628745754	3.6397924999999987
BALB	mutated PU.1 motif	-0.6865100880716533	-6.546352999999998
BALB	mutated PU.1 motif	-0.5228855077778798	2.144004
BALB	mutated PU.1 motif	-0.34069159147531636	2.8743039999999986
BALB	mutated PU.1 motif	1.3823815377918498	3.639792
BALB	mutated PU.1 motif	0.4580586506475739	5.276900000000001
BALB	mutated PU.1 motif	0.0698877825914086	-3.348328000000002
BALB	mutated PU.1 motif	-1.1699250014423122	-3.3483300000000007
BALB	mutated PU.1 motif	-0.2810498191959505	3.639791599999999
BALB	mutated PU.1 motif	1.1510092931104468	2.756804700000001
BALB	mutated PU.1 motif	-0.5752473458879446	-3.4529414999999988
BALB	mutated PU.1 motif	-1.273982212511196	-2.4059363000000005
BALB	mutated PU.1 motif	-0.7968227170035971	-5.137747999999998
BALB	mutated PU.1 motif	2.44255048730864	6.548099000000001
BALB	mutated PU.1 motif	-0.4391657701717362	-3.461973999999998
BALB	mutated PU.1 motif	2.0788343961476548	3.680529
BALB	mutated PU.1 motif	-0.8902240881556756	-4.374306600000001
BALB	mutated PU.1 motif	-0.10469462962626785	3.348329999999999
BALB	mutated PU.1 motif	-0.16870926264513963	-4.723737000000002
BALB	mutated PU.1 motif	1.4423104294289475	6.6582116
BALB	mutated PU.1 motif	3.422762527222627	4.478171000000001
BALB	mutated PU.1 motif	-0.2888778206539979	4.671308999999999
BALB	mutated PU.1 motif	1.341967925287542	4.802497000000001
BALB	mutated PU.1 motif	-0.11181955438752977	-2.6221460000000008
BALB	mutated PU.1 motif	-1.6143230960687918	-3.639792
BALB	mutated PU.1 motif	-2.3223627397775637	-3.5799319999999986
BALB	mutated PU.1 motif	-2.716125001321102	-3.639792
BALB	mutated PU.1 motif	-1.0625414660687125	-3.680529
BALB	mutated PU.1 motif	0.32659038522505224	6.447458
BALB	mutated PU.1 motif	0.0070461436321216375	-2.019154000000002
BALB	mutated PU.1 motif	-2.70604449734071	-6.658210000000002
BALB	mutated PU.1 motif	-0.25573189231839155	-4.4018926
BALB	mutated PU.1 motif	0.8892984087967593	-3.1723800000000004
BALB	mutated PU.1 motif	-1.5142643366028299	-2.8100933999999986
BALB	mutated PU.1 motif	0.7359732229497351	2.9468330000000007
BALB	mutated PU.1 motif	2.000451674979704	3.452942
BALB	mutated PU.1 motif	1.2885765344651432	3.9654370000000005
BALB	mutated PU.1 motif	-0.7313063066086416	-3.6805290000000017
BALB	mutated PU.1 motif	-0.5663433066367398	-3.452941000000001
BALB	mutated C/EBPβ motif	-0.30808028205265536	4.9726624
BALB	mutated C/EBPβ motif	2.7096582481704714	3.5333395999999997
BALB	mutated C/EBPβ motif	-3.5171706897493733	-2.6088319999999996
BALB	mutated C/EBPβ motif	2.0419553164413786	3.3673162000000003
BALB	mutated C/EBPβ motif	-1.4777415439072636	-9.2291512
BALB	mutated C/EBPβ motif	-0.18844283585176846	-2.6877150000000003
BALB	mutated C/EBPβ motif	-0.8295460544487785	-2.6088316999999996
BALB	mutated C/EBPβ motif	-0.2926250864620279	-6.3597413
BALB	mutated C/EBPβ motif	-1.9363891055226268	-6.173249
BALB	mutated C/EBPβ motif	-0.9673038410383255	-3.4783269999999993
BALB	mutated C/EBPβ motif	0.754824712137089	6.207037639999999
BALB	mutated C/EBPβ motif	-2.021883781124031	-6.3597409
BALB	mutated C/EBPβ motif	0.25093331337825564	-6.546658549999999
BALB	mutated C/EBPβ motif	-2.7850911385110995	2.608831500000001
BALB	mutated C/EBPβ motif	-1.1060617906760752	-3.2785914000000003
BALB	mutated C/EBPβ motif	-0.8875945809116859	-5.980286800000001
BALB	mutated C/EBPβ motif	-2.040586207688815	-6.190177500000001
BALB	mutated C/EBPβ motif	-0.0683039184882519	6.546658559999999
BALB	mutated C/EBPβ motif	1.8863530890965303	2.3638303999999994
BALB	mutated C/EBPβ motif	0.6605435202189005	7.5850017
BALB	mutated C/EBPβ motif	-0.866038359725553	-4.1944405
BALB	mutated C/EBPβ motif	-0.047263367887797614	-5.171652300000001
BALB	mutated C/EBPβ motif	0.42398059164586854	2.2161077999999996
BALB	mutated C/EBPβ motif	-0.7299575673810135	-2.2338369999999994
BALB	mutated C/EBPβ motif	-0.22743084771216182	-3.2218736000000003
BALB	mutated C/EBPβ motif	-0.5172317596372684	-4.760397
BALB	mutated C/EBPβ motif	-0.46925626591191616	3.2218730000000004
BALB	mutated C/EBPβ motif	0.30189440970012527	2.6088317000000014
BALB	mutated C/EBPβ motif	1.2438057278523003	3.6435873999999995
BALB	mutated C/EBPβ motif	-1.1592570604786134	-6.4947766
BALB	mutated C/EBPβ motif	0.20492038829922965	2.2493109999999987
BALB	mutated C/EBPβ motif	-0.16559300694582824	3.270728
BALB	mutated C/EBPβ motif	-0.35804255318063394	3.4783275000000002
BALB	mutated C/EBPβ motif	-0.42880199951146647	-2.6088322999999995
BALB	mutated C/EBPβ motif	0.20527737077110686	6.494776700000001
BALB	mutated C/EBPβ motif	-0.1851924121965034	-3.270726
BALB	mutated C/EBPβ motif	2.265451330011082	5.3170098
BALB	mutated C/EBPβ motif	-0.4103432054821212	-2.4920790000000004
BALB	mutated C/EBPβ motif	1.3893072241854263	2.6088310000000003
BALB	mutated C/EBPβ motif	-0.5228855077778798	-3.270726500000001
BALB	mutated C/EBPβ motif	-0.44502419481627165	-3.2218739999999997
BALB	mutated C/EBPβ motif	1.44877822128863	5.8454045
BALB	mutated C/EBPβ motif	0.13089160686256207	2.1253249999999992
BALB	mutated C/EBPβ motif	-0.4525670859326043	3.2218735999999986
BALB	mutated C/EBPβ motif	-2.4836577343171866	-5.4344149999999996
BALB	mutated C/EBPβ motif	-0.8501207454949755	6.3597415
BALB	mutated C/EBPβ motif	-3.3705930618330546	-6.4734184
BALB	mutated C/EBPβ motif	1.643165778294458	6.5004499
BALB	mutated C/EBPβ motif	0.1481704488017912	-3.9316824000000006
BALB	mutated C/EBPβ motif	-1.179323699444562	-3.221873
BALB	mutated C/EBPβ motif	-1.0013133319440324	-8.0729638
BALB	mutated C/EBPβ motif	-0.05849173522380502	-3.2218740000000006
BALB	mutated C/EBPβ motif	-1.2688981111175517	-3.0764839999999993
BALB	mutated C/EBPβ motif	-4.847035887793028	-6.494776999999999
BALB	mutated C/EBPβ motif	2.425570428046735	2.2449390000000005
BALB	mutated C/EBPβ motif	-0.9701626204065308	-4.029643
BALB	mutated C/EBPβ motif	2.0788343961476548	2.1053504
BALB	mutated C/EBPβ motif	-0.03817579138718408	3.221873000000002
BALB	mutated C/EBPβ motif	-2.0015586407335606	-6.494777
BALB	mutated C/EBPβ motif	1.6722559419782415	3.0508294000000014
BALB	mutated C/EBPβ motif	-0.0892765477391948	2.608831999999998
BALB	mutated C/EBPβ motif	-1.2593351857534838	-4.791602999999999
BALB	mutated C/EBPβ motif	-0.3856467350396109	-3.2218729999999987
BALB	mutated C/EBPβ motif	-0.5443001001019825	2.608831000000002
BALB	mutated C/EBPβ motif	2.358936681795969	5.0012175
BALB	mutated C/EBPβ motif	-0.06188589446114623	-4.703658000000003
BALB	mutated C/EBPβ motif	-3.7905599649481463	-5.1392338
BALB	mutated C/EBPβ motif	2.0545785813969797	2.435802
BALB	mutated C/EBPβ motif	0.20254874852746863	-2.5206802999999987
BALB	mutated C/EBPβ motif	-0.45975474063819366	2.4678414
BALB	mutated C/EBPβ motif	-1.155022804497233	-6.494776
BALB	mutated C/EBPβ motif	-0.12556284785222882	3.221873499999999
BALB	mutated C/EBPβ motif	-0.22895889701544192	6.4667393
BALB	mutated C/EBPβ motif	0.4653224092398851	3.2218740000000015
BALB	mutated C/EBPβ motif	0.2755489970437033	3.2218737000000006
BALB	mutated C/EBPβ motif	1.2319800628088395	2.6088322999999987
BALB	mutated C/EBPβ motif	-1.048105910138693	-9.098437
BALB	mutated C/EBPβ motif	-0.4691119246798232	-3.0084496
BALB	mutated C/EBPβ motif	-1.7400594230833635	-3.941857500000001
BALB	mutated C/EBPβ motif	-0.865164397378074	-3.799822999999999
BALB	mutated C/EBPβ motif	-0.029901485713861753	-2.6088320000000014
BALB	mutated C/EBPβ motif	-0.8115345270604735	2.2239649999999997
BALB	mutated MAGGIE motif	-1.9714117644092792	-8.467648
BALB	mutated MAGGIE motif	-0.1115787453092798	2.8869023000000005
BALB	mutated MAGGIE motif	0.0897594628925864	-3.7560998000000003
BALB	mutated MAGGIE motif	0.46998302180568774	-4.3792084
BALB	mutated MAGGIE motif	-1.4981833766609283	-4.5539952
BALB	mutated MAGGIE motif	0.3974865255529436	-6.6384478
BALB	mutated MAGGIE motif	1.279636373170924	2.0455380000000005
BALB	mutated MAGGIE motif	-0.5004577950216476	5.861530999999999
BALB	mutated MAGGIE motif	0.2897134700221926	-3.0260949999999998
BALB	mutated MAGGIE motif	-0.26037844876680305	-5.02135343
BALB	mutated MAGGIE motif	-0.4719970374160276	-3.909256000000001
BALB	mutated MAGGIE motif	-0.28971873923776936	6.658211000000001
BALB	mutated MAGGIE motif	1.5099927731894516	5.507973
BALB	mutated MAGGIE motif	-0.05059988134813942	-2.220936
BALB	mutated MAGGIE motif	-0.30808028205265536	5.574779
BALB	mutated MAGGIE motif	1.3628100286644114	-4.0346937
BALB	mutated MAGGIE motif	2.7096582481704714	-5.7984683
BALB	mutated MAGGIE motif	0.42490681105375927	3.8255775000000005
BALB	mutated MAGGIE motif	-0.7151781107399886	2.576338
BALB	mutated MAGGIE motif	-3.5457535384830674	6.6582110000000005
BALB	mutated MAGGIE motif	-3.5171706897493733	-5.96705
BALB	mutated MAGGIE motif	0.8629734790783115	3.424434999999999
BALB	mutated MAGGIE motif	-1.396087205537484	6.538054
BALB	mutated MAGGIE motif	1.8633598608345792	-5.537061900000001
BALB	mutated MAGGIE motif	-0.765158577925809	-7.85442617
BALB	mutated MAGGIE motif	3.274856748500805	-2.8804182999999988
BALB	mutated MAGGIE motif	2.0419553164413786	-5.3786932
BALB	mutated MAGGIE motif	-1.4777415439072636	-9.0104149
BALB	mutated MAGGIE motif	-0.18844283585176846	3.0856600999999992
BALB	mutated MAGGIE motif	0.2963007441045171	-3.7095026999999994
BALB	mutated MAGGIE motif	-1.1860617224296988	-3.9341123
BALB	mutated MAGGIE motif	-0.8295460544487785	-5.123425
BALB	mutated MAGGIE motif	-0.4748325910739446	5.452551
BALB	mutated MAGGIE motif	-0.2926250864620279	-6.557754000000001
BALB	mutated MAGGIE motif	0.2747889955162952	-7.198354300000001
BALB	mutated MAGGIE motif	-0.9486792163985278	-6.65821
BALB	mutated MAGGIE motif	-0.6767190877683484	2.7513232000000003
BALB	mutated MAGGIE motif	2.5645397829677683	-5.348989999999999
BALB	mutated MAGGIE motif	-1.9363891055226268	-6.658211499999999
BALB	mutated MAGGIE motif	1.185235225798702	-4.738828499999999
BALB	mutated MAGGIE motif	0.9974578054375471	6.4393019
BALB	mutated MAGGIE motif	-1.1037489879447104	6.558534999999999
BALB	mutated MAGGIE motif	-0.9673038410383255	-3.5480164999999992
BALB	mutated MAGGIE motif	0.015459821975071009	5.512724469999999
BALB	mutated MAGGIE motif	2.0499734913373038	5.7100286
BALB	mutated MAGGIE motif	-0.8175919868055876	-6.273413
BALB	mutated MAGGIE motif	0.18523942291898177	-2.2473335000000008
BALB	mutated MAGGIE motif	0.754824712137089	6.1317076
BALB	mutated MAGGIE motif	-0.5693420820399364	-10.308457
BALB	mutated MAGGIE motif	-0.3136272909937783	-6.658211000000002
BALB	mutated MAGGIE motif	-2.021883781124031	-6.5577548000000006
BALB	mutated MAGGIE motif	-0.5476639592981805	4.4198307
BALB	mutated MAGGIE motif	-0.7269893510816976	-6.379494000000001
BALB	mutated MAGGIE motif	0.2517569274441174	-5.838636800000001
BALB	mutated MAGGIE motif	-0.5073703435456114	-4.7878714
BALB	mutated MAGGIE motif	-0.40051461466616356	-3.180698399999999
BALB	mutated MAGGIE motif	-0.5714103132184452	-6.658212
BALB	mutated MAGGIE motif	-0.3491993044241086	6.438197400000001
BALB	mutated MAGGIE motif	0.02206344044992914	-4.789187000000002
BALB	mutated MAGGIE motif	-0.3913153930336781	-6.589430000000001
BALB	mutated MAGGIE motif	-0.47909837115982734	-3.2626264
BALB	mutated MAGGIE motif	-1.077666493590324	-3.5367295999999993
BALB	mutated MAGGIE motif	-0.9315814132192406	-3.363454
BALB	mutated MAGGIE motif	0.25093331337825564	-6.55775453
BALB	mutated MAGGIE motif	-0.057425742076919306	5.24869215
BALB	mutated MAGGIE motif	-0.4825070192876817	-6.077688800000001
BALB	mutated MAGGIE motif	-0.333091291703568	-2.0203275000000005
BALB	mutated MAGGIE motif	-0.74202687999819	3.3211330999999995
BALB	mutated MAGGIE motif	1.6442424018077868	-2.4222445000000006
BALB	mutated MAGGIE motif	3.7623356087468878	6.8539669000000005
BALB	mutated MAGGIE motif	-2.7850911385110995	3.025498699999999
BALB	mutated MAGGIE motif	1.6287407417176891	4.832247999999999
BALB	mutated MAGGIE motif	0.24621929545858423	4.534568999999999
BALB	mutated MAGGIE motif	-0.5871368719554937	3.6913783
BALB	mutated MAGGIE motif	0.2945862460745934	2.5484514000000007
BALB	mutated MAGGIE motif	-1.3914249420568936	-6.044394100000001
BALB	mutated MAGGIE motif	-0.6523567830657351	-5.348990000000001
BALB	mutated MAGGIE motif	-2.96654829430177	3.5347197899999996
BALB	mutated MAGGIE motif	-0.46388798880312	2.6955790000000004
BALB	mutated MAGGIE motif	2.8464210516294104	6.1582558
BALB	mutated MAGGIE motif	-0.9719942561323336	3.9253607
BALB	mutated MAGGIE motif	-1.8066633264350322	-5.8593115000000004
BALB	mutated MAGGIE motif	-0.7334419688550948	3.5516474700000003
BALB	mutated MAGGIE motif	-1.6168698463868814	-4.196992400000001
BALB	mutated MAGGIE motif	-0.18062124273944669	-4.983704
BALB	mutated MAGGIE motif	-0.40284644001399883	-6.4591
BALB	mutated MAGGIE motif	-0.5702442859968144	-5.3031415
BALB	mutated MAGGIE motif	-0.22065007789517654	4.3347885
BALB	mutated MAGGIE motif	2.145885833441178	3.9747462000000002
BALB	mutated MAGGIE motif	0.10494025289628617	6.538055699999999
BALB	mutated MAGGIE motif	-1.6089630485075395	-3.4954494999999994
BALB	mutated MAGGIE motif	-1.2380731649799444	6.403317000000001
BALB	mutated MAGGIE motif	-0.2162944639088984	-6.6582114
BALB	mutated MAGGIE motif	-0.2982870947824763	-3.46681565
BALB	mutated MAGGIE motif	-0.5234523551472838	-2.132179599999998
BALB	mutated MAGGIE motif	0.7878007627609676	3.989890000000001
BALB	mutated MAGGIE motif	1.4779063531986383	4.162468400000001
BALB	mutated MAGGIE motif	1.3397682568415457	-2.735699200000001
BALB	mutated MAGGIE motif	0.31054582645082407	-5.0787059999999995
BALB	mutated MAGGIE motif	-3.5285199913706764	5.600517700000001
BALB	mutated MAGGIE motif	2.2764702076544756	-5.070519400000001
BALB	mutated MAGGIE motif	-0.25111123845797456	-5.9302902999999985
BALB	mutated MAGGIE motif	-1.1060617906760752	-3.4379142000000007
BALB	mutated MAGGIE motif	-0.0926024998486632	-3.233024
BALB	mutated MAGGIE motif	-0.20987364310821555	-2.6863180499999997
BALB	mutated MAGGIE motif	0.47679315238522246	5.2039875
BALB	mutated MAGGIE motif	0.19043177596827388	4.430996000000001
BALB	mutated MAGGIE motif	-0.7751904031406651	-4.676914299999998
BALB	mutated MAGGIE motif	-0.6194577493244844	-2.6933277
BALB	mutated MAGGIE motif	-0.6314913681976702	-2.3169905999999996
BALB	mutated MAGGIE motif	0.8536555500903236	4.5027206
BALB	mutated MAGGIE motif	0.4277987882657719	5.7378727
BALB	mutated MAGGIE motif	-0.5150943776912396	-6.724964
BALB	mutated MAGGIE motif	-0.8875945809116859	-6.486668900000001
BALB	mutated MAGGIE motif	-0.9223360031246521	-3.2620397
BALB	mutated MAGGIE motif	-0.7880870545510863	6.398030400000001
BALB	mutated MAGGIE motif	-3.031310430243635	3.659609
BALB	mutated MAGGIE motif	-2.040586207688815	-6.658211
BALB	mutated MAGGIE motif	2.249850416843195	6.658212000000001
BALB	mutated MAGGIE motif	0.4607014402561358	6.6582114
BALB	mutated MAGGIE motif	-0.0683039184882519	6.557754480000001
BALB	mutated MAGGIE motif	-1.210955666808779	-6.658211400000001
BALB	mutated MAGGIE motif	-0.5540967795426708	-5.6648753
BALB	mutated MAGGIE motif	1.8863530890965303	4.0986898
BALB	mutated MAGGIE motif	0.6605435202189005	7.703714
BALB	mutated MAGGIE motif	-0.5391779390328946	-6.0443940000000005
BALB	mutated MAGGIE motif	-1.654948373344736	-4.9494566
BALB	mutated MAGGIE motif	-0.7415981445109079	5.508784100000001
BALB	mutated MAGGIE motif	0.9456479774884539	2.1723532
BALB	mutated MAGGIE motif	-0.866038359725553	4.7874087
BALB	mutated MAGGIE motif	0.13732887390517323	2.788496
BALB	mutated MAGGIE motif	-0.047263367887797614	-5.741555
BALB	mutated MAGGIE motif	-0.999814169505651	2.605727999999999
BALB	mutated MAGGIE motif	1.1430864843686317	5.8174167
BALB	mutated MAGGIE motif	0.1752172350390273	-2.558449200000001
BALB	mutated MAGGIE motif	1.5362537534378644	-3.271318
BALB	mutated MAGGIE motif	-1.9472680353098744	-6.398030400000001
BALB	mutated MAGGIE motif	-2.3534463880955547	-8.427052619999998
BALB	mutated MAGGIE motif	-0.7461412213261003	-5.163279999999999
BALB	mutated MAGGIE motif	2.326366022122004	6.6384485
BALB	mutated MAGGIE motif	1.9457152021108994	-2.7218001
BALB	mutated MAGGIE motif	0.42398059164586854	-5.772791999999999
BALB	mutated MAGGIE motif	-0.0963490585403548	-6.8857023
BALB	mutated MAGGIE motif	-0.5371875120784493	-2.061840299999999
BALB	mutated MAGGIE motif	-0.7299575673810135	-3.3915823975
BALB	mutated MAGGIE motif	-0.33102069757164276	-4.062269199999999
BALB	mutated MAGGIE motif	0.7914032229771051	-5.654173400000001
BALB	mutated MAGGIE motif	-1.3233102074384355	-3.5730300000000006
BALB	mutated MAGGIE motif	-0.13920898122899716	-5.5896604
BALB	mutated MAGGIE motif	-1.0713634636751266	-4.015895
BALB	mutated MAGGIE motif	0.02776383587739062	-6.0024764
BALB	mutated MAGGIE motif	-0.22743084771216182	5.212556599999999
BALB	mutated MAGGIE motif	-0.5172317596372684	-4.567303
BALB	mutated MAGGIE motif	-0.16583224680842878	-3.8102410000000004
BALB	mutated MAGGIE motif	-0.47648577852226115	-2.073614400000002
BALB	mutated MAGGIE motif	0.14749265418106816	-4.0514701
BALB	mutated MAGGIE motif	0.4036829409131544	-2.096528
BALB	mutated MAGGIE motif	-0.46925626591191616	3.3735660000000003
BALB	mutated MAGGIE motif	0.7886822935284266	-5.0429425
BALB	mutated MAGGIE motif	-0.660635049419362	6.6384485
BALB	mutated MAGGIE motif	-0.6809929878324548	6.06866152
BALB	mutated MAGGIE motif	0.6833962036776553	3.7773529999999997
BALB	mutated MAGGIE motif	-0.5725977857330768	3.6022776400000005
BALB	mutated MAGGIE motif	-1.6828846926111547	-4.511947299999999
BALB	mutated MAGGIE motif	-0.2987496727460033	-3.6447567000000007
BALB	mutated MAGGIE motif	-1.2031404054794432	3.24950197
BALB	mutated MAGGIE motif	0.30189440970012527	3.0041597000000015
BALB	mutated MAGGIE motif	1.6969010971840681	-6.007631999999999
BALB	mutated MAGGIE motif	3.0494195540442752	6.658211999999999
BALB	mutated MAGGIE motif	1.2438057278523003	-3.2817639
BALB	mutated MAGGIE motif	-0.9295164368271491	-4.657859
BALB	mutated MAGGIE motif	1.9114414152589125	4.994738600000001
BALB	mutated MAGGIE motif	0.061382890431788795	-3.88587651
BALB	mutated MAGGIE motif	-1.1592570604786134	-6.5577542
BALB	mutated MAGGIE motif	-0.6770292060081635	-4.242896399999999
BALB	mutated MAGGIE motif	-0.08615026013178362	2.6022885000000002
BALB	mutated MAGGIE motif	0.3425610489101665	6.364803200000001
BALB	mutated MAGGIE motif	0.05521993562576277	-4.430359799999999
BALB	mutated MAGGIE motif	-0.3545857101163499	4.755120400000001
BALB	mutated MAGGIE motif	4.1680958662159115	6.658212000000001
BALB	mutated MAGGIE motif	-0.453437457657337	3.1963954
BALB	mutated MAGGIE motif	-0.06804388886246748	4.306351999999999
BALB	mutated MAGGIE motif	-1.444608527971682	-6.688438
BALB	mutated MAGGIE motif	-1.9146971132299542	-2.8197915999999985
BALB	mutated MAGGIE motif	-1.711083756034553	3.2194227999999994
BALB	mutated MAGGIE motif	0.20492038829922965	2.162127999999999
BALB	mutated MAGGIE motif	-0.16559300694582824	-6.638448499999998
BALB	mutated MAGGIE motif	0.015078185183218018	-3.429291
BALB	mutated MAGGIE motif	1.2316776990255165	-4.8354723
BALB	mutated MAGGIE motif	0.02215979735458351	6.274853499999998
BALB	mutated MAGGIE motif	-0.5089723683054617	-4.434980400000001
BALB	mutated MAGGIE motif	-0.35804255318063394	3.5480156000000003
BALB	mutated MAGGIE motif	-0.09299827386125692	4.434980599999999
BALB	mutated MAGGIE motif	0.2910821279346032	-3.8638713
BALB	mutated MAGGIE motif	0.4225515529361501	-3.0726940000000003
BALB	mutated MAGGIE motif	-0.1486351365836267	5.7415447
BALB	mutated MAGGIE motif	0.10450031417834893	-2.2758127000000004
BALB	mutated MAGGIE motif	-0.6996433969634595	-5.648285699999999
BALB	mutated MAGGIE motif	1.6198617185611206	-3.6022137
BALB	mutated MAGGIE motif	1.7107998501542059	6.4194749
BALB	mutated MAGGIE motif	-0.400329236535355	-5.102094600000001
BALB	mutated MAGGIE motif	0.6202260820045424	3.2772564500000003
BALB	mutated MAGGIE motif	-1.2784846806973418	-2.3071289999999998
BALB	mutated MAGGIE motif	0.15456150831273696	4.371864700000001
BALB	mutated MAGGIE motif	0.14053728708798907	-3.4954020000000003
BALB	mutated MAGGIE motif	-0.44980291743952083	5.32094956
BALB	mutated MAGGIE motif	0.15363179605818722	-6.1483656
BALB	mutated MAGGIE motif	2.2971418476744585	6.3794937
BALB	mutated MAGGIE motif	-0.22394199790312097	-4.363149
BALB	mutated MAGGIE motif	-0.42880199951146647	-6.71440104
BALB	mutated MAGGIE motif	-0.7714073437390079	-3.7286417000000007
BALB	mutated MAGGIE motif	-2.0043683025083103	-3.9047178
BALB	mutated MAGGIE motif	-2.550420715760228	-6.07398953
BALB	mutated MAGGIE motif	0.23913884539181396	3.2278330000000004
BALB	mutated MAGGIE motif	-1.3127231755829394	2.7799924000000003
BALB	mutated MAGGIE motif	-0.6844947984768401	-3.9341125000000003
BALB	mutated MAGGIE motif	0.03954824765893061	-6.611762000000001
BALB	mutated MAGGIE motif	0.2080421829008987	-3.6428632000000007
BALB	mutated MAGGIE motif	0.5015350722203724	5.622728
BALB	mutated MAGGIE motif	0.20527737077110686	6.658211700000001
BALB	mutated MAGGIE motif	-0.1851924121965034	-4.522102299999999
BALB	mutated MAGGIE motif	2.265451330011082	4.9593908
BALB	mutated MAGGIE motif	-0.5297631936798295	-4.9579
BALB	mutated MAGGIE motif	-0.5489136117884819	-4.810726599999999
BALB	mutated MAGGIE motif	0.13836896771163376	-3.8427046999999996
BALB	mutated MAGGIE motif	0.14534591627128446	5.523687300000001
BALB	mutated MAGGIE motif	-0.415902372538298	-4.179852700000001
BALB	mutated MAGGIE motif	0.08465606401071835	4.9999553
BALB	mutated MAGGIE motif	-0.6867171365770668	-6.100443100000001
BALB	mutated MAGGIE motif	-0.4103432054821212	-4.429559499999999
BALB	mutated MAGGIE motif	-0.9334067384671387	-5.64324723
BALB	mutated MAGGIE motif	-2.4076701909475564	-2.3532925000000002
BALB	mutated MAGGIE motif	-1.3113299628745754	-4.610434950000001
BALB	mutated MAGGIE motif	1.3893072241854263	3.5995918000000002
BALB	mutated MAGGIE motif	-1.4646161537348927	-2.605029
BALB	mutated MAGGIE motif	-1.179418915962291	-2.880418500000001
BALB	mutated MAGGIE motif	-0.6865100880716533	-6.183650500000001
BALB	mutated MAGGIE motif	0.052659691478482706	-2.6669079999999994
BALB	mutated MAGGIE motif	-0.6507907056594471	2.1417525
BALB	mutated MAGGIE motif	-0.5228855077778798	6.63844892
BALB	mutated MAGGIE motif	-0.08041151465688845	2.732358800000001
BALB	mutated MAGGIE motif	-0.626337756208823	-2.948816700000001
BALB	mutated MAGGIE motif	1.352882925161719	-4.2194305
BALB	mutated MAGGIE motif	-1.2157286910554364	-4.19671335
BALB	mutated MAGGIE motif	-1.4372088802774643	-4.7492908
BALB	mutated MAGGIE motif	-0.24982886703452634	2.1286120000000004
BALB	mutated MAGGIE motif	-0.44502419481627165	-4.9751916
BALB	mutated MAGGIE motif	-1.2528153419102015	-6.6582116000000005
BALB	mutated MAGGIE motif	0.649484950547381	2.8814966
BALB	mutated MAGGIE motif	1.44877822128863	5.8952186
BALB	mutated MAGGIE motif	0.24283230480317108	-3.7940774000000013
BALB	mutated MAGGIE motif	0.27386510869022107	-2.9670569999999996
BALB	mutated MAGGIE motif	0.13089160686256207	2.3681405999999994
BALB	mutated MAGGIE motif	-0.34069159147531636	5.0842929
BALB	mutated MAGGIE motif	-0.23109643706626226	5.853796
BALB	mutated MAGGIE motif	-0.4525670859326043	3.3735657000000003
BALB	mutated MAGGIE motif	1.5321639824295676	3.2426974
BALB	mutated MAGGIE motif	0.9603443773407752	2.0767760000000006
BALB	mutated MAGGIE motif	-0.664586590894654	-4.9660096000000005
BALB	mutated MAGGIE motif	-0.1733127191954491	6.05525086
BALB	mutated MAGGIE motif	0.35492551903836445	4.0262587
BALB	mutated MAGGIE motif	-2.4836577343171866	-6.426442999999999
BALB	mutated MAGGIE motif	0.4580586506475739	6.658211999999999
BALB	mutated MAGGIE motif	0.0698877825914086	-5.861530599999998
BALB	mutated MAGGIE motif	-0.16141054670074872	4.5461879000000005
BALB	mutated MAGGIE motif	-0.08668375097592396	5.0903152999999985
BALB	mutated MAGGIE motif	3.5708468107339972	-3.7441807000000003
BALB	mutated MAGGIE motif	-2.280214932139481	5.472406999999999
BALB	mutated MAGGIE motif	0.8004648822342335	2.5890109999999997
BALB	mutated MAGGIE motif	3.683650060177241	5.384015499999999
BALB	mutated MAGGIE motif	-0.2810498191959505	-4.423942000000001
BALB	mutated MAGGIE motif	-0.2998404742480454	5.287428900000001
BALB	mutated MAGGIE motif	-2.2466614360995933	-6.853966700000001
BALB	mutated MAGGIE motif	-3.581682779022028	-5.363309000000001
BALB	mutated MAGGIE motif	-2.5923876073884164	-2.8371032699999996
BALB	mutated MAGGIE motif	-0.8501207454949755	6.5577544
BALB	mutated MAGGIE motif	-1.7839562443615744	-2.2468015
BALB	mutated MAGGIE motif	-1.059648290504394	-2.0758446
BALB	mutated MAGGIE motif	1.1510092931104468	2.0722975999999997
BALB	mutated MAGGIE motif	-3.3705930618330546	-6.8337117
BALB	mutated MAGGIE motif	0.1357003554091687	-4.3356725
BALB	mutated MAGGIE motif	-0.30322766517262156	-3.8435813999999997
BALB	mutated MAGGIE motif	1.643165778294458	6.5201712
BALB	mutated MAGGIE motif	-0.7686028705885875	5.2874289999999995
BALB	mutated MAGGIE motif	0.35938017494174046	2.9600622
BALB	mutated MAGGIE motif	3.095318054521126	-2.3984707999999992
BALB	mutated MAGGIE motif	-0.24139093490211927	-3.6960271500000004
BALB	mutated MAGGIE motif	-0.5752473458879446	-6.043804
BALB	mutated MAGGIE motif	-0.4091922917496955	4.096094000000001
BALB	mutated MAGGIE motif	-0.44565012921228986	-3.18225
BALB	mutated MAGGIE motif	1.2052117495110313	4.1114180000000005
BALB	mutated MAGGIE motif	-0.45615335306633886	-4.1429584
BALB	mutated MAGGIE motif	0.5462002494420328	2.2009550000000004
BALB	mutated MAGGIE motif	-2.872782183211738	-6.1553595
BALB	mutated MAGGIE motif	-0.6606577123999795	-4.25197204
BALB	mutated MAGGIE motif	0.03526181561131558	3.4599664999999993
BALB	mutated MAGGIE motif	-0.21582151125252924	2.7127184
BALB	mutated MAGGIE motif	-0.6285724082626878	-6.0443937000000005
BALB	mutated MAGGIE motif	0.6151094641835657	-4.417173200000001
BALB	mutated MAGGIE motif	0.9519540891203677	6.658211199999998
BALB	mutated MAGGIE motif	-0.06803467575961175	2.30028999
BALB	mutated MAGGIE motif	0.1481704488017912	4.412454650000001
BALB	mutated MAGGIE motif	-1.179323699444562	-3.3735662
BALB	mutated MAGGIE motif	-0.5024412168332697	-3.9024422000000003
BALB	mutated MAGGIE motif	-1.0013133319440324	-8.6015389
BALB	mutated MAGGIE motif	-0.6096971893282062	-3.1420132
BALB	mutated MAGGIE motif	-0.11722088151378518	-4.3138893
BALB	mutated MAGGIE motif	-0.04032114183470448	-2.8371034999999996
BALB	mutated MAGGIE motif	-1.273982212511196	-6.658211999999999
BALB	mutated MAGGIE motif	0.07336874320822506	3.9014680000000004
BALB	mutated MAGGIE motif	-0.23495230715965754	-2.9728923000000007
BALB	mutated MAGGIE motif	-0.4002887755239817	-5.197539
BALB	mutated MAGGIE motif	0.2354656861191584	-5.2093549
BALB	mutated MAGGIE motif	-0.3149759664033942	-5.074528899999999
BALB	mutated MAGGIE motif	-0.7968227170035971	3.2742540999999994
BALB	mutated MAGGIE motif	2.44255048730864	3.99427224
BALB	mutated MAGGIE motif	-0.05849173522380502	-4.5740916
BALB	mutated MAGGIE motif	0.33484392175357236	3.3447807
BALB	mutated MAGGIE motif	-0.767589867851366	-5.915853
BALB	mutated MAGGIE motif	-0.42197527173769256	-6.6384487000000005
BALB	mutated MAGGIE motif	0.5876713255247856	6.4900704000000005
BALB	mutated MAGGIE motif	-1.2688981111175517	-6.648149
BALB	mutated MAGGIE motif	-4.847035887793028	-6.5577545
BALB	mutated MAGGIE motif	-0.4391657701717362	-7.419883799999999
BALB	mutated MAGGIE motif	0.25490068284247425	-5.479445000000002
BALB	mutated MAGGIE motif	-0.9787863502419567	5.5010047
BALB	mutated MAGGIE motif	-0.1557297012291574	-4.1893329999999995
BALB	mutated MAGGIE motif	2.425570428046735	5.084196599999999
BALB	mutated MAGGIE motif	-0.7279204545631992	-9.7338531
BALB	mutated MAGGIE motif	-0.6615924487838782	3.9828447000000002
BALB	mutated MAGGIE motif	-0.36191386147897164	-2.6777290999999996
BALB	mutated MAGGIE motif	-0.9701626204065308	-6.3263359999999995
BALB	mutated MAGGIE motif	0.7656453867281441	-4.024714999999999
BALB	mutated MAGGIE motif	0.09063064685823452	2.5226412
BALB	mutated MAGGIE motif	-0.31525289206483365	-2.4822017
BALB	mutated MAGGIE motif	2.0788343961476548	6.714401299999999
BALB	mutated MAGGIE motif	0.4697814767965989	6.0997412
BALB	mutated MAGGIE motif	-0.8902240881556756	6.039497499999999
BALB	mutated MAGGIE motif	-0.9226714203729465	2.5849624500000004
BALB	mutated MAGGIE motif	1.2990624972782063	5.0286282
BALB	mutated MAGGIE motif	-0.7782614377885544	-3.945078799999999
BALB	mutated MAGGIE motif	-0.10469462962626785	5.861529999999999
BALB	mutated MAGGIE motif	-0.9363274519126383	5.1554325
BALB	mutated MAGGIE motif	-0.6858142343106204	3.5544589999999996
BALB	mutated MAGGIE motif	-0.16870926264513963	-6.6582114
BALB	mutated MAGGIE motif	-0.4655904115160734	-3.519727200000001
BALB	mutated MAGGIE motif	-0.7596640991078765	-2.9400696
BALB	mutated MAGGIE motif	-0.6931480182188072	2.863648999999999
BALB	mutated MAGGIE motif	1.4423104294289475	6.658212000000001
BALB	mutated MAGGIE motif	0.9371474836876619	4.3422947
BALB	mutated MAGGIE motif	-0.5463425138090212	-3.934112399999999
BALB	mutated MAGGIE motif	0.3781840459654786	-4.759621000000001
BALB	mutated MAGGIE motif	-0.03817579138718408	3.3735669999999995
BALB	mutated MAGGIE motif	1.0617723801302645	5.316067200000001
BALB	mutated MAGGIE motif	0.37015873279067346	-4.931908099999999
BALB	mutated MAGGIE motif	-0.3163246382769094	4.4295215
BALB	mutated MAGGIE motif	-2.0015586407335606	-6.557754500000001
BALB	mutated MAGGIE motif	0.9091587297727637	3.6276639000000004
BALB	mutated MAGGIE motif	-1.0174210591670665	-3.3571850999999997
BALB	mutated MAGGIE motif	0.042686399101550254	-3.0959694000000004
BALB	mutated MAGGIE motif	-0.2888778206539979	-6.271826599999999
BALB	mutated MAGGIE motif	1.6722559419782415	2.9752660000000004
BALB	mutated MAGGIE motif	-0.8402551254552897	2.4128415999999993
BALB	mutated MAGGIE motif	-0.11181955438752977	-3.5253048999999996
BALB	mutated MAGGIE motif	0.937782784850417	-2.9613991
BALB	mutated MAGGIE motif	-1.6143230960687918	5.9862719
BALB	mutated MAGGIE motif	-0.0892765477391948	3.4768383000000007
BALB	mutated MAGGIE motif	-0.36282746909135355	-5.3732681
BALB	mutated MAGGIE motif	-0.26728507505159005	-4.186986900000001
BALB	mutated MAGGIE motif	-1.2593351857534838	-4.348095
BALB	mutated MAGGIE motif	-0.49455240212096285	5.084196599999999
BALB	mutated MAGGIE motif	0.6194430264952655	-4.4349815
BALB	mutated MAGGIE motif	-0.8537988555255209	-6.127065
BALB	mutated MAGGIE motif	-0.43177219553011437	-6.658211
BALB	mutated MAGGIE motif	-0.33132732000441933	6.568710300000001
BALB	mutated MAGGIE motif	-0.4799297150432986	6.5878250000000005
BALB	mutated MAGGIE motif	-0.3856467350396109	-3.373566499999999
BALB	mutated MAGGIE motif	-0.628279986232716	-6.587824099999999
BALB	mutated MAGGIE motif	-0.013524196978478287	-2.7127184
BALB	mutated MAGGIE motif	0.0393830975305951	3.2265593
BALB	mutated MAGGIE motif	-0.43303951472169144	-6.546208999999999
BALB	mutated MAGGIE motif	-2.3223627397775637	-4.91803
BALB	mutated MAGGIE motif	-2.716125001321102	-2.7789306
BALB	mutated MAGGIE motif	-0.5443001001019825	3.004159999999999
BALB	mutated MAGGIE motif	-1.1300248152286665	-4.800011100000001
BALB	mutated MAGGIE motif	-1.0717906830680102	2.2168399999999995
BALB	mutated MAGGIE motif	-2.292967915437652	-6.6582113000000005
BALB	mutated MAGGIE motif	-0.4982471743750647	4.852935800000001
BALB	mutated MAGGIE motif	1.1076162787051795	-2.990126
BALB	mutated MAGGIE motif	-1.0625414660687125	-2.6809829999999994
BALB	mutated MAGGIE motif	-0.37333538924616505	9.8960687
BALB	mutated MAGGIE motif	1.0189265033416381	-4.546209559999999
BALB	mutated MAGGIE motif	-0.26062461931196523	-5.175444000000001
BALB	mutated MAGGIE motif	2.358936681795969	11.901682000000001
BALB	mutated MAGGIE motif	0.3660808771385584	5.129523900000001
BALB	mutated MAGGIE motif	1.5046922620081067	5.979672000000001
BALB	mutated MAGGIE motif	0.2677478836361371	5.8786793
BALB	mutated MAGGIE motif	-0.669715352757011	-2.1153085999999997
BALB	mutated MAGGIE motif	-0.23542320336183575	5.61988285
BALB	mutated MAGGIE motif	0.16430657396194626	-4.5306805
BALB	mutated MAGGIE motif	-0.06188589446114623	-5.054759000000001
BALB	mutated MAGGIE motif	-3.7905599649481463	-5.6254714
BALB	mutated MAGGIE motif	-0.7921121890721361	-6.6730775
BALB	mutated MAGGIE motif	-2.1012982822501742	2.247333000000001
BALB	mutated MAGGIE motif	-1.569402502744417	6.839040700000001
BALB	mutated MAGGIE motif	2.0545785813969797	2.589563400000001
BALB	mutated MAGGIE motif	1.349643473099185	6.4376547
BALB	mutated MAGGIE motif	-0.11541033835889092	2.1539728000000005
BALB	mutated MAGGIE motif	-0.3600350428294963	-4.5548237
BALB	mutated MAGGIE motif	0.20254874852746863	-5.0742970000000005
BALB	mutated MAGGIE motif	-0.45975474063819366	3.5447138000000002
BALB	mutated MAGGIE motif	0.1989189579236461	2.09711646
BALB	mutated MAGGIE motif	0.32659038522505224	-5.8763549
BALB	mutated MAGGIE motif	0.0070461436321216375	-5.0783999999999985
BALB	mutated MAGGIE motif	-0.9224828947492889	3.850641500000001
BALB	mutated MAGGIE motif	-1.1311625005999453	-8.25193971
BALB	mutated MAGGIE motif	-0.12183154922250594	4.550337799999999
BALB	mutated MAGGIE motif	-1.155022804497233	6.638448400000001
BALB	mutated MAGGIE motif	-0.9420733110579187	-4.077264999999999
BALB	mutated MAGGIE motif	-0.8482106233231201	-5.377833000000001
BALB	mutated MAGGIE motif	0.01666613614951462	-8.7697004
BALB	mutated MAGGIE motif	-0.0707660598535571	-3.040845899999999
BALB	mutated MAGGIE motif	-0.22072252056807695	-6.6384486
BALB	mutated MAGGIE motif	-2.70604449734071	-6.853967000000001
BALB	mutated MAGGIE motif	0.7227992488728239	-4.074078100000001
BALB	mutated MAGGIE motif	-0.25573189231839155	9.908984
BALB	mutated MAGGIE motif	-0.26066132468903724	6.09487556
BALB	mutated MAGGIE motif	-0.787804595439777	-2.2927591000000005
BALB	mutated MAGGIE motif	-0.5616193994751377	-5.3315569
BALB	mutated MAGGIE motif	1.9678774969917212	-2.165039
BALB	mutated MAGGIE motif	-0.19347341495267578	-2.8020298500000007
BALB	mutated MAGGIE motif	-0.09430958903549325	-4.8884988400000005
BALB	mutated MAGGIE motif	-0.1492556645069918	-2.9328850000000006
BALB	mutated MAGGIE motif	-0.12556284785222882	3.3735663000000002
BALB	mutated MAGGIE motif	-0.22895889701544192	6.5388405999999994
BALB	mutated MAGGIE motif	-0.33095136256302293	-3.1954320000000003
BALB	mutated MAGGIE motif	-0.5009808503197446	-2.7646409999999992
BALB	mutated MAGGIE motif	-1.2489539078583074	-4.431505000000001
BALB	mutated MAGGIE motif	0.4653224092398851	6.584962599999999
BALB	mutated MAGGIE motif	-1.5142643366028299	-3.671552000000001
BALB	mutated MAGGIE motif	-0.8885076267812178	-4.84952292
BALB	mutated MAGGIE motif	-0.5438593702902406	-4.822779000000001
BALB	mutated MAGGIE motif	0.2755489970437033	3.3735661
BALB	mutated MAGGIE motif	4.416945795547798	4.406492999999999
BALB	mutated MAGGIE motif	0.022274280334273477	3.480026500000001
BALB	mutated MAGGIE motif	-0.972502074921545	-2.950050700000001
BALB	mutated MAGGIE motif	0.009209476660688942	5.069416
BALB	mutated MAGGIE motif	-0.22903707321587685	3.3460433999999997
BALB	mutated MAGGIE motif	-0.8370715372190238	5.3132757999999995
BALB	mutated MAGGIE motif	-0.32034596400952076	-3.906388999999999
BALB	mutated MAGGIE motif	0.989301817675643	-5.3977553
BALB	mutated MAGGIE motif	1.2319800628088395	6.7134888
BALB	mutated MAGGIE motif	0.7186348301474017	9.3594412
BALB	mutated MAGGIE motif	0.35122604449259054	-6.269568700000001
BALB	mutated MAGGIE motif	0.16377640397492854	5.2551814
BALB	mutated MAGGIE motif	-1.048105910138693	-9.4012531
BALB	mutated MAGGIE motif	-0.0309523082493266	2.7879463
BALB	mutated MAGGIE motif	0.7220253499146256	-3.6921799999999996
BALB	mutated MAGGIE motif	-0.2008011554017699	-4.041312999999999
BALB	mutated MAGGIE motif	-1.0156873061507898	-3.1721509999999995
BALB	mutated MAGGIE motif	-0.3560385078610162	3.0794213000000004
BALB	mutated MAGGIE motif	0.7151031797016225	5.939850999999999
BALB	mutated MAGGIE motif	-0.4691119246798232	-3.5741587
BALB	mutated MAGGIE motif	-1.7400594230833635	-4.381531800000001
BALB	mutated MAGGIE motif	-0.865164397378074	4.1806178
BALB	mutated MAGGIE motif	-0.1783666617758639	4.9287275500000005
BALB	mutated MAGGIE motif	0.0965262744244022	-4.0933098999999995
BALB	mutated MAGGIE motif	0.9069416725956856	6.274852700000001
BALB	mutated MAGGIE motif	-1.0589984181045304	-3.8989771
BALB	mutated MAGGIE motif	0.366934201300837	-4.0000002
BALB	mutated MAGGIE motif	-0.2695435147073484	-6.379493499999999
BALB	mutated MAGGIE motif	-0.8906285708163191	2.1068525499999997
BALB	mutated MAGGIE motif	-1.6582999813342507	2.36866197
BALB	mutated MAGGIE motif	2.000451674979704	6.7249631
BALB	mutated MAGGIE motif	1.2885765344651432	-6.587824599999999
BALB	mutated MAGGIE motif	1.8955456220145095	6.281822000000001
BALB	mutated MAGGIE motif	-0.2542818037958128	-2.7356991699999997
BALB	mutated MAGGIE motif	-2.632799417582496	-3.0715821
BALB	mutated MAGGIE motif	-0.029901485713861753	-4.742756099999999
BALB	mutated MAGGIE motif	0.1299988170295534	7.1679402
BALB	mutated MAGGIE motif	-1.3055399241008576	-8.682572400000002
BALB	mutated MAGGIE motif	0.5270483871301357	-5.4543947500000005
BALB	mutated MAGGIE motif	0.2485703217720996	-5.804855659999999
BALB	mutated MAGGIE motif	1.2004834644853268	3.77132656
BALB	mutated MAGGIE motif	-0.3416819889941465	-3.3676554000000003
BALB	mutated MAGGIE motif	1.2077151660066718	2.048973
BALB	mutated MAGGIE motif	-0.13284055169838282	6.658211499999999
BALB	mutated MAGGIE motif	0.8766044671176485	3.2167064000000005
BALB	mutated MAGGIE motif	-0.1263056713350732	2.837103599999998
BALB	mutated MAGGIE motif	-0.7313063066086416	4.0622692
BALB	mutated MAGGIE motif	0.6683785089087935	6.560602
BALB	mutated MAGGIE motif	-0.8115345270604735	-5.0582289
BALB	mutated MAGGIE motif	-0.5663433066367398	-6.724963499999999
BALB	mutated MAGGIE motif	-0.13808631310986508	4.0
BALB	mutated MAGGIE motif	-0.832466216517628	3.5737830999999995
BALB	altered spacing	-0.18559892393223265	na
BALB	altered spacing	0.5241339232770583	na
BALB	altered spacing	-0.6646237597184839	na
BALB	altered spacing	0.9736942374467108	na
BALB	altered spacing	-0.6070226179709213	na
BALB	altered spacing	0.7220731260195712	na
BALB	altered spacing	-0.7113219623477809	na
BALB	altered spacing	0.8211639446502921	na
BALB	altered spacing	-0.39120105571361385	na
BALB	altered spacing	-1.3314547991929562	na
BALB	altered spacing	-0.32809271876556245	na
BALB	altered spacing	-0.04051857702617134	na
BALB	altered spacing	1.718736352922908	na
BALB	altered spacing	0.08544935847356161	na
BALB	altered spacing	-0.6503069359867752	na
BALB	altered spacing	-0.2800320098485338	na
BALB	altered spacing	0.056196279661616	na
BALB	altered spacing	0.29367367818416223	na
BALB	altered spacing	0.012112134365855454	na
BALB	altered spacing	0.746125593451682	na
BALB	altered spacing	1.0532747930423483	na
BALB	altered spacing	-0.257778680382299	na
BALB	altered spacing	-0.6638365375687618	na
BALB	altered spacing	-0.04393929164981536	na
BALB	altered spacing	-0.5817082280356471	na
BALB	altered spacing	-0.03176958049339351	na
BALB	altered spacing	-2.001699144688075	na
BALB	altered spacing	-1.614144514665309	na
BALB	altered spacing	-0.9657259754523944	na
BALB	altered spacing	0.1656979399920111	na
BALB	altered spacing	-0.8019608857294642	na
BALB	altered spacing	-0.6503078950819541	na
BALB	altered spacing	1.3567957074242591	na
BALB	altered spacing	-0.503542197708434	na
BALB	altered spacing	-0.2577450172910005	na
BALB	altered spacing	1.8573726993640851	na
BALB	altered spacing	-0.23347744837938134	na
BALB	altered spacing	1.0242669685047516	na
BALB	altered spacing	-1.0263574469638392	na
BALB	altered spacing	0.751727385480522	na
BALB	altered spacing	0.7886621928639626	na
BALB	altered spacing	-1.1524778577045076	na
BALB	altered spacing	-1.6187012896362005	na
BALB	altered spacing	0.5026554773690433	na
BALB	altered spacing	1.1300765058498656	na
BALB	altered spacing	1.1941353439719324	na
BALB	altered spacing	0.39645217772541796	na
BALB	altered spacing	0.07814536723862986	na
BALB	altered spacing	-0.44585602684282843	na
BALB	altered spacing	-0.8356842684126784	na
BALB	altered spacing	-0.44049629565552006	na
BALB	altered spacing	0.22610783683543678	na
BALB	altered spacing	-0.29739208975901343	na
BALB	altered spacing	0.8832560700137417	na
BALB	no motif/spacing effect	0.16396694871774464	na
BALB	no motif/spacing effect	1.5861016204336242	na
BALB	no motif/spacing effect	-0.3811672982620383	na
BALB	no motif/spacing effect	-0.5725787762653236	na
BALB	no motif/spacing effect	1.2801567471432889	na
BALB	no motif/spacing effect	-1.2457055893313753	na
BALB	no motif/spacing effect	-0.7288150129140023	na
BALB	no motif/spacing effect	0.3838793431105705	na
BALB	no motif/spacing effect	-0.23716611131376464	na
BALB	no motif/spacing effect	-0.026679331459298794	na
BALB	no motif/spacing effect	0.0023433965672667867	na
BALB	no motif/spacing effect	-0.7476637319072807	na
BALB	no motif/spacing effect	-0.21726037719664415	na
BALB	no motif/spacing effect	0.38350373983886943	na
BALB	no motif/spacing effect	0.2729973877162304	na
BALB	no motif/spacing effect	-0.00925956517500559	na
BALB	no motif/spacing effect	-0.1439399581690486	na
BALB	no motif/spacing effect	-0.5043690446130453	na
BALB	no motif/spacing effect	-0.3387816237981296	na
BALB	no motif/spacing effect	-0.7125620926899465	na
BALB	no motif/spacing effect	0.10344739828683647	na
BALB	no motif/spacing effect	-0.3374202161716955	na
BALB	no motif/spacing effect	0.4278910248149179	na
BALB	no motif/spacing effect	-0.42401137254758314	na
BALB	no motif/spacing effect	0.5275165739977026	na
BALB	no motif/spacing effect	-0.27757782577559276	na
BALB	no motif/spacing effect	0.4159686908434055	na
BALB	no motif/spacing effect	0.20748293210358515	na
BALB	no motif/spacing effect	-1.1548362007466109	na
BALB	no motif/spacing effect	-0.683315306894432	na
BALB	no motif/spacing effect	-0.2557768516955048	na
BALB	no motif/spacing effect	-0.34779788257832944	na
BALB	no motif/spacing effect	0.5738133336349258	na
BALB	no motif/spacing effect	-0.5983165296964925	na
BALB	no motif/spacing effect	-0.6021536043189157	na
BALB	no motif/spacing effect	-0.4071601076551552	na
BALB	no motif/spacing effect	-0.06304395425953135	na
BALB	no motif/spacing effect	-1.828022753344464	na
BALB	no motif/spacing effect	-1.1427919646523197	na
BALB	no motif/spacing effect	-0.11982141825928139	na
BALB	no motif/spacing effect	-1.5107802934729975	na
BALB	no motif/spacing effect	0.8676478520601272	na
BALB	no motif/spacing effect	0.8830007515372582	na
BALB	no motif/spacing effect	-0.9709090430772607	na
BALB	no motif/spacing effect	-0.1771579197108304	na
BALB	no motif/spacing effect	-0.09076502145544474	na
BALB	no motif/spacing effect	-0.5747471080103308	na
BALB	no motif/spacing effect	0.1606670335812157	na
BALB	no motif/spacing effect	-0.03419361874818527	na
BALB	no motif/spacing effect	0.48203332015960054	na
BALB	no motif/spacing effect	-0.6684680874714388	na
BALB	no motif/spacing effect	-0.4835946067352701	na
BALB	no motif/spacing effect	-0.770652723177685	na
BALB	no motif/spacing effect	-0.2737535008114911	na
BALB	no motif/spacing effect	1.3191674584024984	na
BALB	no motif/spacing effect	-0.20890725633677043	na
BALB	no motif/spacing effect	-0.13385030351661076	na
BALB	no motif/spacing effect	-0.34680576735440827	na
BALB	no motif/spacing effect	-0.6057311910707002	na
BALB	no motif/spacing effect	-0.078271270392678	na
BALB	no motif/spacing effect	0.6286644001702273	na
BALB	no motif/spacing effect	0.40183834170005284	na
BALB	no motif/spacing effect	0.5780164351082928	na
BALB	no motif/spacing effect	1.3356471131533283	na
BALB	no motif/spacing effect	0.31580333473662137	na
BALB	no motif/spacing effect	0.12619944915385073	na
BALB	no motif/spacing effect	0.8219117404200507	na
BALB	no motif/spacing effect	-0.27067424900404724	na
BALB	no motif/spacing effect	-0.5370331020228143	na
BALB	no motif/spacing effect	-0.00920173077181241	na
BALB	no motif/spacing effect	1.0746722561453836	na
BALB	no motif/spacing effect	-0.5213964550296337	na
BALB	no motif/spacing effect	-0.8884801615003814	na
BALB	no motif/spacing effect	-0.42653580668800295	na
BALB	no motif/spacing effect	-0.7867340301995993	na
BALB	no motif/spacing effect	-0.6250007739965548	na
BALB	no motif/spacing effect	-0.8346538517853306	na
BALB	no motif/spacing effect	-0.0632262801480783	na
BALB	no motif/spacing effect	-0.41638473855909997	na
BALB	no motif/spacing effect	0.3036210627231912	na
BALB	no motif/spacing effect	-0.7619001333002169	na
BALB	no motif/spacing effect	-0.3800744886864402	na
BALB	no motif/spacing effect	-0.20116216097225337	na
BALB	no motif/spacing effect	0.26105623988391713	na
BALB	no motif/spacing effect	0.8923689556389363	na
BALB	no motif/spacing effect	1.0479427527810161	na
BALB	no motif/spacing effect	0.3420498241320713	na
BALB	no motif/spacing effect	-0.5141224073652699	na
BALB	no motif/spacing effect	-0.72393143347559	na
BALB	no motif/spacing effect	1.188125824875867	na
BALB	no motif/spacing effect	-0.1344387181591964	na
BALB	no motif/spacing effect	-0.24829878727105825	na
BALB	no motif/spacing effect	0.7400689995917604	na
BALB	no motif/spacing effect	-0.42182294475205406	na
BALB	no motif/spacing effect	-1.0276693354556725	na
BALB	no motif/spacing effect	-0.7445964096840951	na
BALB	no motif/spacing effect	-0.5876165879175446	na
BALB	no motif/spacing effect	-0.3829117906643047	na
BALB	no motif/spacing effect	-0.6005103851051743	na
BALB	no motif/spacing effect	-1.045041840436117	na
BALB	no motif/spacing effect	0.030622218141461488	na
BALB	no motif/spacing effect	-0.2676753355413073	na
BALB	no motif/spacing effect	0.14423355183240583	na
BALB	no motif/spacing effect	1.409013711651074	na
BALB	no motif/spacing effect	0.19886254834020978	na
BALB	no motif/spacing effect	0.013758984616343284	na
BALB	no motif/spacing effect	-0.10496955960154342	na
BALB	no motif/spacing effect	0.7453158650176941	na
BALB	no motif/spacing effect	0.851593156961088	na
BALB	no motif/spacing effect	-0.04676954292689128	na
BALB	no motif/spacing effect	-0.09813315540997714	na
BALB	no motif/spacing effect	0.5164067598705735	na
BALB	no motif/spacing effect	1.144132101071285	na
BALB	no motif/spacing effect	0.027211199748574444	na
BALB	no motif/spacing effect	-0.7043153044930826	na
BALB	no motif/spacing effect	-0.35342507726556427	na
BALB	no motif/spacing effect	0.33170911567994743	na
BALB	no motif/spacing effect	-0.2327933551261152	na
BALB	no motif/spacing effect	-0.17489961488892192	na
BALB	no motif/spacing effect	1.3463050250219242	na
BALB	no motif/spacing effect	-0.1599838692392428	na
BALB	no motif/spacing effect	0.3989466003663753	na
BALB	no motif/spacing effect	-0.5628763165536519	na
BALB	no motif/spacing effect	-0.47302821393900185	na
BALB	no motif/spacing effect	-0.24363607402224918	na
BALB	no motif/spacing effect	-0.5389381193169709	na
BALB	no motif/spacing effect	0.02693577420169646	na
BALB	no motif/spacing effect	-0.3869298511080945	na
BALB	no motif/spacing effect	-0.5631524425729202	na
BALB	no motif/spacing effect	-0.3843031386960014	na
BALB	no motif/spacing effect	1.0649080595811466	na
BALB	no motif/spacing effect	-0.3341006160618418	na
BALB	no motif/spacing effect	-0.8370378378512928	na
BALB	no motif/spacing effect	-0.8782754079637201	na
BALB	no motif/spacing effect	-0.32294214922087416	na
BALB	no motif/spacing effect	0.38232785836569283	na
BALB	no motif/spacing effect	0.6903711700630812	na
BALB	no motif/spacing effect	-0.023115775565326402	na
BALB	no motif/spacing effect	0.16818443139846995	na
BALB	no motif/spacing effect	0.8685121750904703	na
BALB	no motif/spacing effect	1.291544127945043	na
BALB	no motif/spacing effect	0.2733403914132584	na
BALB	no motif/spacing effect	0.8980176445592298	na
BALB	no motif/spacing effect	-1.0407927048318841	na
BALB	no motif/spacing effect	0.5536751281425141	na
BALB	no motif/spacing effect	0.13293650797722822	na
BALB	no motif/spacing effect	-0.2566499895225087	na
BALB	no motif/spacing effect	-0.5706109169436906	na
BALB	no motif/spacing effect	-0.468833809389789	na
BALB	no motif/spacing effect	-0.2632170370184026	na
BALB	no motif/spacing effect	0.32703240412202295	na
BALB	no motif/spacing effect	0.8261735608753598	na
BALB	no motif/spacing effect	0.4853183783209918	na
BALB	no motif/spacing effect	0.27874652579444215	na
BALB	no motif/spacing effect	-0.30603046800715417	na
BALB	no motif/spacing effect	-0.5052604237144234	na
BALB	no motif/spacing effect	-0.38388384257582553	na
BALB	no motif/spacing effect	-0.10415754029708246	na
BALB	no motif/spacing effect	1.4213866375317448	na
BALB	no motif/spacing effect	0.07447424329456132	na
BALB	no motif/spacing effect	-0.23779142666511177	na
BALB	no motif/spacing effect	0.6761280085137282	na
BALB	no motif/spacing effect	1.2133045485084888	na
BALB	no motif/spacing effect	0.014797001928080533	na
BALB	no motif/spacing effect	-1.2821380647816456	na
BALB	no motif/spacing effect	1.1111664657956428	na
BALB	no motif/spacing effect	0.3269924091386427	na
BALB	no motif/spacing effect	-0.015146543753865371	na
BALB	no motif/spacing effect	0.08127426795451198	na
BALB	no motif/spacing effect	-0.7116866866117988	na
BALB	no motif/spacing effect	0.006113123726612102	na
BALB	no motif/spacing effect	-0.6145887244507682	na
BALB	no motif/spacing effect	0.17053437633664714	na
BALB	no motif/spacing effect	-0.13116582865801618	na
BALB	no motif/spacing effect	-0.6105120873376109	na
BALB	no motif/spacing effect	-0.48751951270501515	na
BALB	no motif/spacing effect	-0.3397137056902677	na
BALB	no motif/spacing effect	0.15248885365975795	na
BALB	no motif/spacing effect	0.021824457534344255	na
BALB	no motif/spacing effect	-0.015814847769208384	na
BALB	no motif/spacing effect	-0.2399971451132732	na
BALB	no motif/spacing effect	-0.6427015718332321	na
BALB	no motif/spacing effect	1.839742805342294	na
BALB	no motif/spacing effect	0.18294412458279696	na
BALB	no motif/spacing effect	-0.21009791082667517	na
BALB	no motif/spacing effect	-0.7705004812628244	na
BALB	no motif/spacing effect	1.0728563420916157	na
BALB	no motif/spacing effect	-1.091078116807262	na
BALB	no motif/spacing effect	-1.558863097303829	na
BALB	no motif/spacing effect	-0.6112647693258708	na
BALB	no motif/spacing effect	0.03916047051107796	na
BALB	no motif/spacing effect	-1.0534864359219753	na
BALB	no motif/spacing effect	0.33371266278856915	na
BALB	no motif/spacing effect	0.1551749138633518	na
BALB	no motif/spacing effect	-0.2715951926292606	na
BALB	no motif/spacing effect	-0.9310526462825086	na
BALB	no motif/spacing effect	-1.4647804799761381	na
BALB	no motif/spacing effect	-0.9724514508688458	na
BALB	no motif/spacing effect	-0.3734991525029647	na
BALB	no motif/spacing effect	-0.41199661771835494	na
BALB	no motif/spacing effect	-0.7230378372429973	na
BALB	no motif/spacing effect	-0.2540054400326679	na
BALB	no motif/spacing effect	0.05294189698875229	na
BALB	no motif/spacing effect	-0.06143957809283007	na
BALB	no motif/spacing effect	-0.26317197568618145	na
BALB	no motif/spacing effect	-1.0515249810759846	na
BALB	no motif/spacing effect	-0.07579535054220443	na
BALB	no motif/spacing effect	1.2425486175795772	na
BALB	no motif/spacing effect	-0.5752281324300439	na
BALB	no motif/spacing effect	-0.20949392982815151	na
BALB	no motif/spacing effect	0.16602687683110418	na
BALB	no motif/spacing effect	0.35301577267145934	na
BALB	no motif/spacing effect	0.6602506280253935	na
BALB	no motif/spacing effect	-0.2482658055575624	na
BALB	no motif/spacing effect	0.6771323446490229	na
BALB	no motif/spacing effect	-0.049462847393610954	na
BALB	no motif/spacing effect	-0.2774459871283552	na
BALB	no motif/spacing effect	1.1558332234616002	na
BALB	no motif/spacing effect	-0.5631782120804312	na
BALB	no motif/spacing effect	-0.4329149489460029	na
BALB	no motif/spacing effect	-0.3623298204156882	na
BALB	no motif/spacing effect	-0.5656325581407269	na
BALB	no motif/spacing effect	-0.16380089901157646	na
BALB	no motif/spacing effect	-0.05915002546369852	na
BALB	no motif/spacing effect	-0.22105439235569246	na
BALB	no motif/spacing effect	0.40821962667802314	na
BALB	no motif/spacing effect	0.44498828271284196	na
BALB	no motif/spacing effect	-0.014182419849908534	na
BALB	no motif/spacing effect	-0.8059976809015588	na
BALB	no motif/spacing effect	0.0702990494244311	na
BALB	no motif/spacing effect	-0.2627073011864596	na
BALB	no motif/spacing effect	-0.10716744537897593	na
BALB	no motif/spacing effect	0.7008461683595546	na
BALB	no motif/spacing effect	-0.40226626060194093	na
BALB	no motif/spacing effect	-0.03410392107942295	na
BALB	no motif/spacing effect	0.05619829032856405	na
BALB	no motif/spacing effect	0.8088695626596025	na
BALB	no motif/spacing effect	0.2851091255613678	na
BALB	no motif/spacing effect	0.378938940739469	na
BALB	no motif/spacing effect	0.19426602140407478	na
BALB	no motif/spacing effect	-0.7659125437938128	na
BALB	no motif/spacing effect	-0.2233260782115778	na
BALB	no motif/spacing effect	-0.1369984326191105	na
BALB	no motif/spacing effect	0.6456757269852003	na
BALB	no motif/spacing effect	-0.23970618157199475	na
BALB	no motif/spacing effect	0.022056019230778823	na
BALB	no motif/spacing effect	0.4994283014501133	na
BALB	no motif/spacing effect	-0.7815602472741894	na
BALB	no motif/spacing effect	1.345046938218373	na
BALB	no motif/spacing effect	1.2481597006237584	na
BALB	no motif/spacing effect	-0.33309890549670573	na
BALB	no motif/spacing effect	-0.9369534824922972	na
BALB	no motif/spacing effect	-0.85815391523185	na
BALB	no motif/spacing effect	-0.7770859026351271	na
BALB	no motif/spacing effect	0.4984124687647222	na
BALB	no motif/spacing effect	0.13378180976919385	na
BALB	no motif/spacing effect	0.23774518950524315	na
BALB	no motif/spacing effect	1.6897957931105365	na
BALB	no motif/spacing effect	1.4691942539120046	na
BALB	no motif/spacing effect	1.1832097144584526	na
BALB	no motif/spacing effect	0.8065287867660338	na
BALB	no motif/spacing effect	0.638458235188716	na
BALB	no motif/spacing effect	-0.2693757231285838	na
BALB	no motif/spacing effect	-1.1479874923075526	na
BALB	no motif/spacing effect	-0.8013276302728434	na
BALB	no motif/spacing effect	-3.141661149223591	na
BALB	no motif/spacing effect	0.24470258306153658	na
BALB	no motif/spacing effect	-0.1799555586950703	na
BALB	no motif/spacing effect	0.2853286738852545	na
BALB	no motif/spacing effect	-0.34494377533088105	na
BALB	no motif/spacing effect	-0.6930754589952901	na
BALB	no motif/spacing effect	-0.7499622768927443	na
BALB	no motif/spacing effect	0.14213284942098903	na
BALB	no motif/spacing effect	0.949746526999482	na
BALB	no motif/spacing effect	-0.2833782329347949	na
BALB	no motif/spacing effect	-0.2548516308498021	na
BALB	no motif/spacing effect	-0.30969360702710347	na
BALB	no motif/spacing effect	-0.0024002062069152785	na
BALB	no motif/spacing effect	0.07238722000949238	na
BALB	no motif/spacing effect	-0.3377218213971318	na
BALB	no motif/spacing effect	-1.1572040602609155	na
BALB	no motif/spacing effect	-0.0981157517546829	na
BALB	no motif/spacing effect	-0.2518610170826836	na
BALB	no motif/spacing effect	-0.17202616400648818	na
BALB	no motif/spacing effect	0.4276600344021819	na
BALB	no motif/spacing effect	0.907792561902911	na
BALB	no motif/spacing effect	-0.46706844776032597	na
BALB	no motif/spacing effect	0.06306091432708438	na
BALB	no motif/spacing effect	-0.2832182941831185	na
BALB	no motif/spacing effect	0.12426928800263237	na
BALB	no motif/spacing effect	0.012876500868189034	na
BALB	no motif/spacing effect	0.11556707416942125	na
BALB	no motif/spacing effect	-0.5825301991016127	na
BALB	no motif/spacing effect	-0.7418267990933805	na
BALB	no motif/spacing effect	-0.24656157360653674	na
BALB	no motif/spacing effect	-0.27862651252992077	na
BALB	no motif/spacing effect	-0.44183042270879014	na
BALB	no motif/spacing effect	-0.3555017359363788	na
BALB	no motif/spacing effect	-0.30812229536233193	na
BALB	no motif/spacing effect	0.0632673190136801	na
BALB	no motif/spacing effect	1.3354958598465747	na
BALB	no motif/spacing effect	-0.1942132684273945	na
BALB	no motif/spacing effect	-0.08561368787600454	na
BALB	no motif/spacing effect	-0.8249074291974159	na
BALB	no motif/spacing effect	0.2953809402758032	na
BALB	no motif/spacing effect	0.7984001001782843	na
BALB	no motif/spacing effect	0.6760054998308966	na
BALB	no motif/spacing effect	0.7303929402427198	na
BALB	no motif/spacing effect	1.2171378219132492	na
BALB	no motif/spacing effect	-0.37978726276436614	na
BALB	no motif/spacing effect	-0.028077987262399517	na
BALB	no motif/spacing effect	0.017112087576959922	na
BALB	no motif/spacing effect	0.6640431796068436	na
BALB	no motif/spacing effect	-0.10368962117272806	na
BALB	no motif/spacing effect	0.24452110818246675	na
BALB	no motif/spacing effect	-0.40323969371231705	na
BALB	no motif/spacing effect	-0.3273641361780122	na
BALB	no motif/spacing effect	-0.8911302683099169	na
BALB	no motif/spacing effect	-0.5367809496336262	na
BALB	no motif/spacing effect	-0.4815544295354375	na
BALB	no motif/spacing effect	-0.5876738246555959	na
BALB	no motif/spacing effect	0.32048555805348933	na
BALB	no motif/spacing effect	-0.08837638268759473	na
BALB	no motif/spacing effect	0.0056174386740242	na
BALB	no motif/spacing effect	0.12330695182928597	na
BALB	no motif/spacing effect	-0.0768721959982388	na
BALB	no motif/spacing effect	-0.5144922566492003	na
BALB	no motif/spacing effect	-0.3200016426070764	na
BALB	no motif/spacing effect	-0.5827835742750782	na
BALB	no motif/spacing effect	-0.7282253785992401	na
BALB	no motif/spacing effect	-0.610290484365021	na
BALB	no motif/spacing effect	0.13587082300599196	na
BALB	no motif/spacing effect	1.0361250717328048	na
BALB	no motif/spacing effect	-0.3296062227644603	na
BALB	no motif/spacing effect	-0.269278848096425	na
BALB	no motif/spacing effect	-0.09951420950608902	na
BALB	no motif/spacing effect	-0.5834257826626503	na
BALB	no motif/spacing effect	-0.23829183196435633	na
BALB	no motif/spacing effect	0.19688207082886677	na
BALB	no motif/spacing effect	0.20291087194348245	na
BALB	no motif/spacing effect	0.9405635062503714	na
BALB	no motif/spacing effect	0.3466102413878991	na
BALB	no motif/spacing effect	0.07192637811987357	na
BALB	no motif/spacing effect	-0.7088901387566517	na
BALB	no motif/spacing effect	-0.15116794657145505	na
BALB	no motif/spacing effect	-0.32252734517256787	na
BALB	no motif/spacing effect	-0.34171197773847695	na
BALB	no motif/spacing effect	-0.2137600138078839	na
BALB	no motif/spacing effect	-0.20945768661339947	na
BALB	no motif/spacing effect	-0.233021229034299	na
BALB	no motif/spacing effect	-0.3745241201516034	na
BALB	no motif/spacing effect	-0.7725895038969273	na
BALB	no motif/spacing effect	1.2764946233215286	na
BALB	no motif/spacing effect	0.12027364325144863	na
BALB	no motif/spacing effect	0.05419897915138172	na
BALB	no motif/spacing effect	1.6629290769611305	na
BALB	no motif/spacing effect	-0.14404757427238746	na
BALB	no motif/spacing effect	-1.0258217602012882	na
BALB	no motif/spacing effect	0.04400002735168318	na
BALB	no motif/spacing effect	0.5736873843978398	na
BALB	no motif/spacing effect	-0.5102192347167129	na
BALB	no motif/spacing effect	-0.030053320380341475	na
BALB	no motif/spacing effect	-0.4072893869880616	na
BALB	no motif/spacing effect	-0.21562774328638	na
BALB	no motif/spacing effect	0.41820061179543355	na
BALB	no motif/spacing effect	0.0772954206753278	na
BALB	no motif/spacing effect	-0.11249490102791793	na
BALB	no motif/spacing effect	1.645619106165202	na
BALB	no motif/spacing effect	-0.14075833627742762	na
BALB	no motif/spacing effect	-0.3742508373983586	na
BALB	no motif/spacing effect	1.2184235191335022	na
BALB	no motif/spacing effect	0.6110566968723007	na
BALB	no motif/spacing effect	-0.7657200472103822	na
BALB	no motif/spacing effect	-1.304655383041271	na
BALB	no motif/spacing effect	0.30880466438085286	na
BALB	no motif/spacing effect	-0.37281610164706924	na
BALB	no motif/spacing effect	-1.3284423505502958	na
BALB	no motif/spacing effect	0.5683515378762407	na
BALB	no motif/spacing effect	1.1020297826477226	na
BALB	no motif/spacing effect	0.34707245706343937	na
BALB	no motif/spacing effect	0.8116797667879285	na
BALB	no motif/spacing effect	1.2117887232502653	na
BALB	no motif/spacing effect	1.1538974357337564	na
BALB	no motif/spacing effect	0.20721324062504465	na
BALB	no motif/spacing effect	0.28530370526806514	na
BALB	no motif/spacing effect	-0.21020209905189358	na
BALB	no motif/spacing effect	-0.45806729201515584	na
BALB	no motif/spacing effect	-0.3836731211087132	na
BALB	no motif/spacing effect	-0.45789800100772826	na
BALB	no motif/spacing effect	0.21955263396725755	na
BALB	no motif/spacing effect	-0.0797393976511298	na
BALB	no motif/spacing effect	-0.10943753150760127	na
BALB	no motif/spacing effect	-0.401414215414869	na
BALB	no motif/spacing effect	-0.11357334262718854	na
BALB	no motif/spacing effect	0.191648073260545	na
BALB	no motif/spacing effect	1.5695956733139331	na
BALB	no motif/spacing effect	0.19146605226380142	na
BALB	no motif/spacing effect	-0.4698859762744636	na
BALB	no motif/spacing effect	-0.7332875933445901	na
BALB	no motif/spacing effect	-0.6145750339248703	na
BALB	no motif/spacing effect	-0.20533836126950167	na
BALB	no motif/spacing effect	0.2844533894686998	na
BALB	no motif/spacing effect	1.0074772729243762	na
BALB	no motif/spacing effect	1.9670169657083836	na
BALB	no motif/spacing effect	-0.5607642147458582	na
BALB	no motif/spacing effect	1.0320760604829382	na
BALB	no motif/spacing effect	-0.34162035879778774	na
BALB	no motif/spacing effect	-0.5330225922048921	na
BALB	no motif/spacing effect	-0.29417426731242813	na
BALB	no motif/spacing effect	-0.22432650039698476	na
BALB	no motif/spacing effect	-0.19670724065130507	na
BALB	no motif/spacing effect	-0.3380618179104591	na
BALB	no motif/spacing effect	0.013131642397626209	na
BALB	no motif/spacing effect	-0.5800575651963173	na
BALB	no motif/spacing effect	-0.2097060891236886	na
BALB	no motif/spacing effect	-0.4465440654478634	na
BALB	no motif/spacing effect	-0.7681988322680908	na
BALB	no motif/spacing effect	0.2823836979946375	na
BALB	no motif/spacing effect	1.0467127451683285	na
BALB	no motif/spacing effect	0.21866145759026434	na
BALB	no motif/spacing effect	0.9686925499493664	na
BALB	no motif/spacing effect	-0.49747787159575907	na
BALB	no motif/spacing effect	-0.2195445820589157	na
BALB	no motif/spacing effect	0.6371852093873471	na
BALB	no motif/spacing effect	0.9994380934531155	na
BALB	no motif/spacing effect	-0.26592181979748286	na
BALB	no motif/spacing effect	-0.07758945419754504	na
BALB	no motif/spacing effect	0.38409614949933246	na
BALB	no motif/spacing effect	-0.07113524774938718	na
BALB	no motif/spacing effect	-0.6042577834213452	na
BALB	no motif/spacing effect	-0.6782068478262735	na
BALB	no motif/spacing effect	0.6060648052405182	na
BALB	no motif/spacing effect	0.29524755211196263	na
BALB	no motif/spacing effect	-0.262277284304536	na
BALB	no motif/spacing effect	-1.1933222780071575	na
BALB	no motif/spacing effect	-0.11724215493164136	na
BALB	no motif/spacing effect	-0.1945266821202143	na
BALB	no motif/spacing effect	0.6567683919044152	na
BALB	no motif/spacing effect	-0.22808682070779174	na
BALB	no motif/spacing effect	0.8671147463748374	na
BALB	no motif/spacing effect	-0.04709189242672318	na
BALB	no motif/spacing effect	-0.28842928993282246	na
BALB	no motif/spacing effect	-0.44435306610339964	na
BALB	no motif/spacing effect	-0.9370328163600066	na
BALB	no motif/spacing effect	-0.1716799526164401	na
BALB	no motif/spacing effect	-0.37247465653286316	na
BALB	no motif/spacing effect	-0.5750257494271205	na
BALB	no motif/spacing effect	-0.3444919730133895	na
BALB	no motif/spacing effect	0.20572024430269664	na
BALB	no motif/spacing effect	0.1185006800163304	na
BALB	no motif/spacing effect	-0.7908534554744628	na
BALB	no motif/spacing effect	-0.637273442241586	na
BALB	no motif/spacing effect	-0.39487857211265	na
BALB	no motif/spacing effect	-0.9733174065690386	na
BALB	no motif/spacing effect	-1.1271473472847768	na
BALB	no motif/spacing effect	1.5228285235536476	na
BALB	no motif/spacing effect	-1.1798916853251606	na
BALB	no motif/spacing effect	-0.5023234059532955	na
BALB	no motif/spacing effect	3.2369624969610618	na
BALB	no motif/spacing effect	3.245272449356949	na
BALB	no motif/spacing effect	1.0796522492203655	na
BALB	no motif/spacing effect	0.6801822489837304	na
BALB	no motif/spacing effect	-0.2943448360774288	na
BALB	no motif/spacing effect	0.4234094127532462	na
BALB	no motif/spacing effect	-0.13475373742583496	na
BALB	no motif/spacing effect	0.04378663119057968	na
BALB	no motif/spacing effect	-0.5932675115554877	na
BALB	no motif/spacing effect	-0.22329377094896596	na
BALB	no motif/spacing effect	-0.43869068701945846	na
BALB	no motif/spacing effect	-0.08167858132577699	na
BALB	no motif/spacing effect	0.9143999669048717	na
BALB	no motif/spacing effect	0.45628625765071895	na
BALB	no motif/spacing effect	0.13771829338478803	na
BALB	no motif/spacing effect	-0.4513116279299476	na
BALB	no motif/spacing effect	-0.4230407765455251	na
BALB	no motif/spacing effect	-0.23934926182520666	na
BALB	no motif/spacing effect	-0.12947142624215058	na
BALB	no motif/spacing effect	0.184834456462454	na
BALB	no motif/spacing effect	-0.5894070802630376	na
BALB	no motif/spacing effect	0.05085720217674172	na
BALB	no motif/spacing effect	-0.22820576055410502	na
BALB	no motif/spacing effect	-0.04215252854540186	na
BALB	no motif/spacing effect	-0.5711541102211237	na
BALB	no motif/spacing effect	-0.7325812133950826	na
BALB	no motif/spacing effect	0.1405215296121316	na
BALB	no motif/spacing effect	-0.2423488527128561	na
BALB	no motif/spacing effect	-0.5163804324951435	na
BALB	no motif/spacing effect	-0.2434160667088392	na
BALB	no motif/spacing effect	1.5210290070024923	na
BALB	no motif/spacing effect	-1.2321804537569978	na
BALB	no motif/spacing effect	0.29921243495164385	na
BALB	no motif/spacing effect	0.4610457042334186	na
BALB	no motif/spacing effect	-0.5934687180015388	na
BALB	no motif/spacing effect	0.08912522222835761	na
BALB	no motif/spacing effect	0.1358026179589764	na
BALB	no motif/spacing effect	0.9753515380800772	na
BALB	no motif/spacing effect	-0.46274895180534426	na
BALB	no motif/spacing effect	-0.17523457291134958	na
BALB	no motif/spacing effect	-0.07442116292403167	na
BALB	no motif/spacing effect	-0.08831313898067172	na
BALB	no motif/spacing effect	-0.11489882486732217	na
BALB	no motif/spacing effect	0.290618692360578	na
BALB	no motif/spacing effect	-0.03704609846440299	na
BALB	no motif/spacing effect	0.41488764780731113	na
BALB	no motif/spacing effect	0.6582001551027914	na
BALB	no motif/spacing effect	0.15397573041598722	na
BALB	no motif/spacing effect	0.19070205402460294	na
BALB	no motif/spacing effect	0.19987646683658067	na
BALB	no motif/spacing effect	-0.37568079882737226	na
BALB	no motif/spacing effect	-0.2836692516377921	na
BALB	no motif/spacing effect	1.185866545311334	na
BALB	no motif/spacing effect	-0.38750550075212864	na
BALB	no motif/spacing effect	1.2003661150064493	na
BALB	no motif/spacing effect	0.2581178792505634	na
BALB	no motif/spacing effect	0.27356507332596314	na
BALB	no motif/spacing effect	-2.4822226461551797	na
BALB	no motif/spacing effect	-0.4939310905445753	na
BALB	no motif/spacing effect	-0.7866404855351607	na
BALB	no motif/spacing effect	0.6250204844172003	na
BALB	no motif/spacing effect	-0.2830419534688535	na
BALB	no motif/spacing effect	-0.4585872425556703	na
BALB	no motif/spacing effect	-0.051998386081058	na
BALB	no motif/spacing effect	0.16911654244615493	na
BALB	no motif/spacing effect	-0.44928897908054566	na
BALB	no motif/spacing effect	0.0732776072162249	na
BALB	no motif/spacing effect	0.5658560429422841	na
BALB	no motif/spacing effect	-0.334318466619981	na
BALB	no motif/spacing effect	-0.5738888096230834	na
BALB	no motif/spacing effect	-0.5771345105941323	na
BALB	no motif/spacing effect	0.1773301117339896	na
BALB	no motif/spacing effect	-0.5574112004741423	na
BALB	no motif/spacing effect	-0.2506646021328729	na
BALB	no motif/spacing effect	0.38393032087242096	na
BALB	no motif/spacing effect	-0.9186621107338104	na
BALB	no motif/spacing effect	0.05265642007006832	na
BALB	no motif/spacing effect	0.03886733551945376	na
BALB	no motif/spacing effect	0.11460215992298473	na
BALB	no motif/spacing effect	1.0581659353702735	na
BALB	no motif/spacing effect	-0.08812549053527974	na
BALB	no motif/spacing effect	0.02846742321117457	na
BALB	no motif/spacing effect	-0.19622053216622337	na
BALB	no motif/spacing effect	0.08023333884012152	na
BALB	no motif/spacing effect	-0.9885069777003395	na
BALB	no motif/spacing effect	-0.5482983192013844	na
BALB	no motif/spacing effect	-0.1661377187324291	na
BALB	no motif/spacing effect	0.20235230925380598	na
BALB	no motif/spacing effect	-0.24841806920289677	na
BALB	no motif/spacing effect	-0.5863457175489657	na
BALB	no motif/spacing effect	-0.034175388996115164	na
BALB	no motif/spacing effect	1.3636948529300343	na
BALB	no motif/spacing effect	-0.4014309485803427	na
BALB	no motif/spacing effect	0.7732164171523568	na
BALB	no motif/spacing effect	-0.03873470350900288	na
BALB	no motif/spacing effect	-0.22470002767354558	na
BALB	no motif/spacing effect	-0.6527967480225145	na
BALB	no motif/spacing effect	-0.11495467036836526	na
BALB	no motif/spacing effect	-0.412779975520813	na
BALB	no motif/spacing effect	-0.03279969312502473	na
BALB	no motif/spacing effect	-0.15354581621600882	na
BALB	no motif/spacing effect	-0.02846561320595642	na
BALB	no motif/spacing effect	-0.055616682552750873	na
BALB	no motif/spacing effect	-1.2948153775323643	na
BALB	no motif/spacing effect	-0.06908673780927543	na
BALB	no motif/spacing effect	0.972519263577893	na
BALB	no motif/spacing effect	-0.09992650140665393	na
BALB	no motif/spacing effect	0.44240785081017453	na
BALB	no motif/spacing effect	-0.6169483804617357	na
BALB	no motif/spacing effect	-0.7268955248943669	na
BALB	no motif/spacing effect	0.5230775050649221	na
BALB	no motif/spacing effect	0.10159814000780676	na
BALB	no motif/spacing effect	-0.30292713295730644	na
BALB	no motif/spacing effect	0.9431248413433959	na
BALB	no motif/spacing effect	0.9391447946131453	na
BALB	no motif/spacing effect	0.12190962634730562	na
BALB	no motif/spacing effect	-0.9571404401296313	na
BALB	no motif/spacing effect	-0.31542744275037204	na
BALB	no motif/spacing effect	0.019871444865417143	na
BALB	no motif/spacing effect	0.8588743969772943	na
BALB	no motif/spacing effect	-0.5662993614035674	na
BALB	no motif/spacing effect	0.09960804169022364	na
BALB	no motif/spacing effect	-0.5809156676584548	na
BALB	no motif/spacing effect	-0.7251156028850403	na
BALB	no motif/spacing effect	-0.440996726341524	na
BALB	no motif/spacing effect	-0.3242408558213459	na
BALB	no motif/spacing effect	-0.7436058700543482	na
BALB	no motif/spacing effect	-0.6014325531162275	na
BALB	no motif/spacing effect	-0.20888314053098256	na
BALB	no motif/spacing effect	-0.2811950340324918	na
BALB	no motif/spacing effect	-0.12499069859317569	na
BALB	no motif/spacing effect	-1.1875947501260415	na
BALB	no motif/spacing effect	-0.503918780365094	na
BALB	no motif/spacing effect	-0.38922477768964736	na
BALB	no motif/spacing effect	0.1800138190658962	na
BALB	no motif/spacing effect	-0.4001897348715304	na
BALB	no motif/spacing effect	-0.5892749330620815	na
BALB	no motif/spacing effect	0.6800184244646683	na
BALB	no motif/spacing effect	-0.3113826245259186	na
BALB	no motif/spacing effect	-0.004699502925539889	na
BALB	no motif/spacing effect	-0.9726458494739703	na
BALB	no motif/spacing effect	-0.45247196608646556	na
BALB	no motif/spacing effect	-1.0067043537918936	na
BALB	no motif/spacing effect	-0.22840734499596493	na
BALB	no motif/spacing effect	-0.5024494478169084	na
BALB	no motif/spacing effect	-0.5013881510554539	na
BALB	no motif/spacing effect	0.25245812024733305	na
BALB	no motif/spacing effect	-0.41854628505598246	na
BALB	no motif/spacing effect	0.6527614118468836	na
BALB	no motif/spacing effect	-0.008023773332654471	na
BALB	no motif/spacing effect	-0.4161018261739535	na
BALB	no motif/spacing effect	-0.32611320973847935	na
BALB	no motif/spacing effect	0.2143409286491007	na
BALB	no motif/spacing effect	-0.3782810973654289	na
BALB	no motif/spacing effect	-0.11215516008202808	na
BALB	no motif/spacing effect	-0.16483449240793124	na
BALB	no motif/spacing effect	-0.7531545349390125	na
BALB	no motif/spacing effect	-0.5960314972555487	na
BALB	no motif/spacing effect	-0.8500495913321919	na
BALB	no motif/spacing effect	2.2194085628976263	na
BALB	no motif/spacing effect	-0.01591464823902289	na
BALB	no motif/spacing effect	0.6209908099053703	na
BALB	no motif/spacing effect	1.12577789775793	na
BALB	no motif/spacing effect	0.24557720875724742	na
BALB	no motif/spacing effect	-0.051206955876502924	na
BALB	no motif/spacing effect	-0.3172023880176056	na
BALB	no motif/spacing effect	-0.06660163721357915	na
BALB	no motif/spacing effect	-0.5674395250531337	na
BALB	no motif/spacing effect	-0.43776856197896574	na
BALB	no motif/spacing effect	-1.2141248053528473	na
BALB	no motif/spacing effect	1.587145095753005	na
BALB	no motif/spacing effect	0.8206098783755751	na
BALB	no motif/spacing effect	0.703333428607813	na
BALB	no motif/spacing effect	0.12012494305325028	na
BALB	no motif/spacing effect	0.7597595773306276	na
BALB	no motif/spacing effect	0.4587052226494981	na
BALB	no motif/spacing effect	0.07575889371613598	na
BALB	no motif/spacing effect	0.3153614242835201	na
BALB	no motif/spacing effect	0.41392730681090795	na
BALB	no motif/spacing effect	-0.46898339724211446	na
BALB	no motif/spacing effect	0.9384381972972502	na
BALB	no motif/spacing effect	-0.1352564490838306	na
BALB	no motif/spacing effect	0.19335261247360958	na
BALB	no motif/spacing effect	-0.21672574250425836	na
BALB	no motif/spacing effect	-0.8924375573822383	na
BALB	no motif/spacing effect	0.288589164037905	na
BALB	no motif/spacing effect	0.18601198560994892	na
BALB	no motif/spacing effect	-0.39457816995898654	na
BALB	no motif/spacing effect	-0.3385749572237078	na
BALB	no motif/spacing effect	1.180858326555707	na
BALB	no motif/spacing effect	0.9889785939087479	na
BALB	no motif/spacing effect	0.03198394697021367	na
BALB	no motif/spacing effect	-0.615392847663347	na
BALB	no motif/spacing effect	-0.12805155143439517	na
BALB	no motif/spacing effect	0.8826602571820321	na
BALB	no motif/spacing effect	0.7321423839308383	na
BALB	no motif/spacing effect	0.1051042549596799	na
BALB	no motif/spacing effect	0.1001971706321676	na
BALB	no motif/spacing effect	-0.22874589856630223	na
BALB	no motif/spacing effect	-0.5984965512761766	na
BALB	no motif/spacing effect	-0.6192299484435706	na
BALB	no motif/spacing effect	-0.38789709373035297	na
BALB	no motif/spacing effect	-0.2010001273396096	na
BALB	no motif/spacing effect	-0.2891234157706464	na
BALB	no motif/spacing effect	0.5960459998501721	na
BALB	no motif/spacing effect	0.41976798836141604	na
BALB	no motif/spacing effect	0.40964424050862513	na
BALB	no motif/spacing effect	0.17007085344070694	na
BALB	no motif/spacing effect	-0.5215420884093511	na
BALB	no motif/spacing effect	-0.09833155758513268	na
BALB	no motif/spacing effect	-0.5887526568835209	na
BALB	no motif/spacing effect	-0.42176882013027184	na
BALB	no motif/spacing effect	-0.5304856535432414	na
BALB	no motif/spacing effect	-0.6628447931447683	na
BALB	no motif/spacing effect	-0.3650946232970913	na
BALB	no motif/spacing effect	-0.044943569512323034	na
BALB	no motif/spacing effect	-0.6294356960271017	na
BALB	no motif/spacing effect	-0.572989859055081	na
BALB	no motif/spacing effect	-0.035300258924165995	na
BALB	no motif/spacing effect	0.36355576731395267	na
BALB	no motif/spacing effect	-0.006369234975376337	na
BALB	no motif/spacing effect	-0.04109502109735885	na
BALB	no motif/spacing effect	-0.5600062230815173	na
BALB	no motif/spacing effect	-0.1881975014528514	na
BALB	no motif/spacing effect	-0.8991701338118858	na
BALB	no motif/spacing effect	0.8475407905091372	na
BALB	no motif/spacing effect	-0.3036661566732288	na
BALB	no motif/spacing effect	0.9905189469891149	na
BALB	no motif/spacing effect	1.039221309797719	na
BALB	no motif/spacing effect	0.22665025533960437	na
BALB	no motif/spacing effect	0.5027448858371484	na
BALB	no motif/spacing effect	0.47039474202076903	na
BALB	no motif/spacing effect	0.5184133452656066	na
BALB	no motif/spacing effect	1.9111810814555117	na
BALB	no motif/spacing effect	1.2056486330133729	na
BALB	no motif/spacing effect	0.9003834374893556	na
BALB	no motif/spacing effect	0.03439261670096094	na
BALB	no motif/spacing effect	0.5607409398497243	na
BALB	no motif/spacing effect	1.5328080571828657	na
BALB	no motif/spacing effect	0.4860122177406141	na
BALB	no motif/spacing effect	0.8496657269155685	na
BALB	no motif/spacing effect	0.1117292013378961	na
BALB	no motif/spacing effect	0.5807862992094925	na
BALB	no motif/spacing effect	0.6756892538016437	na
BALB	no motif/spacing effect	1.8029149193324905	na
BALB	no motif/spacing effect	-0.5569190641322388	na
BALB	no motif/spacing effect	-0.7883586630062362	na
BALB	no motif/spacing effect	0.14165718318794696	na
BALB	no motif/spacing effect	-0.367494260534003	na
BALB	no motif/spacing effect	0.008392664976598851	na
BALB	no motif/spacing effect	-0.13768784661218714	na
BALB	no motif/spacing effect	1.317602169484572	na
BALB	no motif/spacing effect	-0.39666763727172594	na
BALB	no motif/spacing effect	0.20536272093713093	na
BALB	no motif/spacing effect	-0.47501416818839903	na
BALB	no motif/spacing effect	-0.747953743503543	na
BALB	no motif/spacing effect	0.05733910989670665	na
BALB	no motif/spacing effect	0.016534591036316826	na
BALB	no motif/spacing effect	-0.16074835506733542	na
BALB	no motif/spacing effect	0.19070205402460294	na
BALB	no motif/spacing effect	0.06968090900120494	na
BALB	no motif/spacing effect	0.689695109605819	na
BALB	no motif/spacing effect	1.8798310872553423	na
BALB	no motif/spacing effect	-0.041216191486374676	na
BALB	no motif/spacing effect	-0.22907161842490442	na
BALB	no motif/spacing effect	-0.8837136063130755	na
BALB	no motif/spacing effect	1.7968815908280957	na
BALB	no motif/spacing effect	0.06634249482869592	na
BALB	no motif/spacing effect	0.25872182885387307	na
BALB	no motif/spacing effect	-1.1085413867385743	na
BALB	no motif/spacing effect	-0.10780570324326444	na
BALB	no motif/spacing effect	-0.18549846181073093	na
BALB	no motif/spacing effect	0.44024846612385193	na
BALB	no motif/spacing effect	-0.005929907471948326	na
BALB	no motif/spacing effect	-0.8766940161944783	na
BALB	no motif/spacing effect	-1.0549518968721934	na
BALB	no motif/spacing effect	0.018892705047384606	na
BALB	no motif/spacing effect	-0.2877401321196835	na
BALB	no motif/spacing effect	-0.2820631812599448	na
BALB	no motif/spacing effect	0.32145030218854576	na
BALB	no motif/spacing effect	-0.08183639287665034	na
BALB	no motif/spacing effect	-0.026333417283360916	na
BALB	no motif/spacing effect	0.29760252337087856	na
BALB	no motif/spacing effect	0.6917500042577753	na
BALB	no motif/spacing effect	0.5794998094505308	na
BALB	no motif/spacing effect	-0.5289182899272475	na
BALB	no motif/spacing effect	0.08679639086724578	na
BALB	no motif/spacing effect	-1.1297829979033196	na
BALB	no motif/spacing effect	-1.1180087061215587	na
BALB	no motif/spacing effect	-1.1214891146549633	na
BALB	no motif/spacing effect	-0.8461956470043637	na
BALB	no motif/spacing effect	0.23489756499446734	na
BALB	no motif/spacing effect	0.9217748326944979	na
BALB	no motif/spacing effect	0.2364580325259933	na
BALB	no motif/spacing effect	-0.9428905200051156	na
BALB	no motif/spacing effect	-0.23586994411073636	na
BALB	no motif/spacing effect	-0.7671171122202578	na
BALB	no motif/spacing effect	-0.6513737572681979	na
BALB	no motif/spacing effect	-1.4266751531803772	na
BALB	no motif/spacing effect	-0.9085392170872275	na
BALB	no motif/spacing effect	-0.8326668422189196	na
BALB	no motif/spacing effect	-0.9799354767311819	na
BALB	no motif/spacing effect	-0.7236670370846099	na
BALB	no motif/spacing effect	-0.5758917819978642	na
BALB	no motif/spacing effect	-0.516588496609411	na
BALB	no motif/spacing effect	-0.539060812694399	na
BALB	no motif/spacing effect	-0.8188753100576935	na
BALB	no motif/spacing effect	-1.57365489949136	na
BALB	no motif/spacing effect	-1.2611882979619713	na
BALB	no motif/spacing effect	-0.2894944889680655	na
BALB	no motif/spacing effect	-0.387410207759161	na
BALB	no motif/spacing effect	0.7119081365745683	na
BALB	no motif/spacing effect	0.4470167038099131	na
BALB	no motif/spacing effect	-0.1269237366940139	na
BALB	no motif/spacing effect	-1.580018130992424	na
BALB	no motif/spacing effect	0.5048210779635482	na
BALB	no motif/spacing effect	-0.47289507494701066	na
BALB	no motif/spacing effect	-0.3220481421821031	na
BALB	no motif/spacing effect	-0.9203491177130729	na
BALB	no motif/spacing effect	0.29660393852749545	na
BALB	no motif/spacing effect	0.2178589671790241	na
BALB	no motif/spacing effect	0.39771246548881756	na
BALB	no motif/spacing effect	-0.821639435919634	na
BALB	no motif/spacing effect	-0.18472133037757477	na
BALB	no motif/spacing effect	-0.07979076832359855	na
BALB	no motif/spacing effect	-0.20714523956570297	na
BALB	no motif/spacing effect	-0.6806986595370601	na
BALB	no motif/spacing effect	0.2201625985727862	na
BALB	no motif/spacing effect	-0.4696438299293142	na
BALB	no motif/spacing effect	0.8454900509443752	na
BALB	no motif/spacing effect	-0.45136996895256587	na
BALB	no motif/spacing effect	-0.37497636430184134	na
BALB	no motif/spacing effect	-0.5345773544288583	na
BALB	no motif/spacing effect	-0.18854138717400382	na
BALB	no motif/spacing effect	-0.5436301658378069	na
BALB	no motif/spacing effect	-1.3750924777815356	na
BALB	no motif/spacing effect	-0.7373850875792352	na
BALB	no motif/spacing effect	-0.3028226163461918	na
BALB	no motif/spacing effect	-0.7479592565630364	na
BALB	no motif/spacing effect	-0.8732554658963503	na
BALB	no motif/spacing effect	-0.17521716389204567	na
BALB	no motif/spacing effect	-0.13365362755958898	na
BALB	no motif/spacing effect	-0.0665890638901252	na
BALB	no motif/spacing effect	1.6055938334932864	na
BALB	no motif/spacing effect	-0.3795521016859613	na
BALB	no motif/spacing effect	-0.1012203126608453	na
BALB	no motif/spacing effect	-0.1836021294881025	na
BALB	no motif/spacing effect	-0.660857349760438	na
BALB	no motif/spacing effect	-0.7829355684501986	na
BALB	no motif/spacing effect	-0.10151417945679153	na
BALB	no motif/spacing effect	-0.36036811038457106	na
BALB	no motif/spacing effect	0.686783273659509	na
BALB	no motif/spacing effect	-1.2835899280154592	na
BALB	no motif/spacing effect	-0.6799590146569034	na
BALB	no motif/spacing effect	-0.40864700588006553	na
BALB	no motif/spacing effect	-0.049384421950460666	na
BALB	no motif/spacing effect	0.25986426660584616	na
BALB	no motif/spacing effect	-0.11872179788188486	na
BALB	no motif/spacing effect	-0.3882165751877946	na
BALB	no motif/spacing effect	0.40395400014982785	na
BALB	no motif/spacing effect	0.0856087155088372	na
BALB	no motif/spacing effect	0.9008748244006071	na
BALB	no motif/spacing effect	-0.6121141069811227	na
BALB	no motif/spacing effect	-0.1624173867924883	na
BALB	no motif/spacing effect	-0.5096975512887134	na
BALB	no motif/spacing effect	-0.6644626131630771	na
BALB	no motif/spacing effect	-0.29008300355538363	na
BALB	no motif/spacing effect	-0.8895401592754801	na
BALB	no motif/spacing effect	-0.6557337201877824	na
BALB	no motif/spacing effect	1.6163707259096598	na
BALB	no motif/spacing effect	0.0397408376834707	na
BALB	no motif/spacing effect	0.5969209650292111	na
BALB	no motif/spacing effect	0.09451167990184972	na
BALB	no motif/spacing effect	0.21463766793539563	na
BALB	no motif/spacing effect	-0.3758913897354308	na
BALB	no motif/spacing effect	-0.2838704243022532	na
BALB	no motif/spacing effect	0.4439389803535514	na
BALB	no motif/spacing effect	-0.43783750166457036	na
BALB	no motif/spacing effect	-0.7149569732324457	na
BALB	no motif/spacing effect	0.06324660382951652	na
BALB	no motif/spacing effect	0.7651818366154028	na
BALB	no motif/spacing effect	0.22457276735147014	na
BALB	no motif/spacing effect	0.1636393755352259	na
BALB	no motif/spacing effect	1.9891160072320697	na
BALB	no motif/spacing effect	-0.32375313629568847	na
BALB	no motif/spacing effect	1.475680001972318	na
BALB	no motif/spacing effect	-0.16770461617772892	na
BALB	no motif/spacing effect	-0.3706648601266789	na
BALB	no motif/spacing effect	0.25843635702955847	na
BALB	no motif/spacing effect	0.9691902674538144	na
BALB	no motif/spacing effect	0.4435025834498254	na
BALB	no motif/spacing effect	-0.29527525120120757	na
BALB	no motif/spacing effect	-0.26778254993970574	na
BALB	no motif/spacing effect	-0.00028599366549997285	na
BALB	no motif/spacing effect	1.0807474138843616	na
BALB	no motif/spacing effect	0.34003921352921385	na
BALB	no motif/spacing effect	-0.7470261547977444	na
BALB	no motif/spacing effect	-0.9170790402999822	na
BALB	no motif/spacing effect	-0.26181488332593705	na
BALB	no motif/spacing effect	-0.6432098767039172	na
BALB	no motif/spacing effect	-0.8989700797687554	na
BALB	no motif/spacing effect	-0.958129056142389	na
BALB	no motif/spacing effect	-0.6595584112791801	na
BALB	no motif/spacing effect	-0.3768945541052915	na
BALB	no motif/spacing effect	0.9902355292844573	na
BALB	no motif/spacing effect	-0.592667165446191	na
BALB	no motif/spacing effect	-0.2857625158503607	na
BALB	no motif/spacing effect	-0.38078239241228307	na
BALB	no motif/spacing effect	-0.24482908347439203	na
BALB	no motif/spacing effect	0.11722065574798668	na
BALB	no motif/spacing effect	1.1938585855994743	na
BALB	no motif/spacing effect	-0.4395085060334072	na
BALB	no motif/spacing effect	0.23890006097137073	na
BALB	no motif/spacing effect	0.2440008388805195	na
BALB	no motif/spacing effect	0.8344072143301648	na
BALB	no motif/spacing effect	0.41339215216164815	na
BALB	no motif/spacing effect	-0.33589074792541007	na
BALB	no motif/spacing effect	-0.5546597405576303	na
BALB	no motif/spacing effect	-1.5134181347062854	na
BALB	no motif/spacing effect	-0.22489726811347044	na
BALB	no motif/spacing effect	-0.47810967687344164	na
BALB	no motif/spacing effect	-0.3392541033281016	na
BALB	no motif/spacing effect	-0.8103691812359024	na
BALB	no motif/spacing effect	-1.363545354923347	na
BALB	no motif/spacing effect	-1.0386333830933774	na
BALB	no motif/spacing effect	-1.572976885120477	na
BALB	no motif/spacing effect	-2.7602913006709113	na
BALB	no motif/spacing effect	-0.37898278427715004	na
BALB	no motif/spacing effect	-0.6044706596103699	na
BALB	no motif/spacing effect	-0.8460083534614959	na
BALB	no motif/spacing effect	1.2233998899813625	na
BALB	no motif/spacing effect	-1.1439448940502097	na
BALB	no motif/spacing effect	0.6515856290377395	na
BALB	no motif/spacing effect	0.261592855433483	na
BALB	no motif/spacing effect	-0.6124712003903463	na
BALB	no motif/spacing effect	0.19124752378787857	na
BALB	no motif/spacing effect	-0.3248301282148196	na
BALB	no motif/spacing effect	-1.2431970679179933	na
BALB	no motif/spacing effect	-0.4751557309722747	na
BALB	no motif/spacing effect	-0.9404584866598205	na
BALB	no motif/spacing effect	-0.20583617995455228	na
BALB	no motif/spacing effect	-0.7457670006707788	na
BALB	no motif/spacing effect	-0.44277652691839986	na
BALB	no motif/spacing effect	-0.3347593730172269	na
BALB	no motif/spacing effect	0.36145478164743405	na
BALB	no motif/spacing effect	-0.24131760941014768	na
BALB	no motif/spacing effect	-0.5604352183204746	na
BALB	no motif/spacing effect	-0.27335687720165525	na
BALB	no motif/spacing effect	0.5101376230229655	na
BALB	no motif/spacing effect	0.05205750511914076	na
BALB	no motif/spacing effect	0.16680049164166277	na
BALB	no motif/spacing effect	-0.43050718790110576	na
BALB	no motif/spacing effect	-0.1305315631422248	na
BALB	no motif/spacing effect	0.5208321633014406	na
BALB	no motif/spacing effect	-0.26135977414153944	na
BALB	no motif/spacing effect	1.1581957088602053	na
BALB	no motif/spacing effect	1.4381977841980775	na
BALB	no motif/spacing effect	-0.3168964077996823	na
BALB	no motif/spacing effect	1.3021066539746187	na
BALB	no motif/spacing effect	-0.15294211431381965	na
BALB	no motif/spacing effect	-0.19488273321468075	na
BALB	no motif/spacing effect	-0.019724389638014372	na
BALB	no motif/spacing effect	-0.47455424817405056	na
BALB	no motif/spacing effect	-0.26712881980687264	na
BALB	no motif/spacing effect	0.06353565685033558	na
BALB	no motif/spacing effect	0.24244655919954416	na
BALB	no motif/spacing effect	-0.9936304751242728	na
BALB	no motif/spacing effect	-0.4222225122076084	na
BALB	no motif/spacing effect	0.2189881536280378	na
BALB	no motif/spacing effect	0.8533411273317846	na
BALB	no motif/spacing effect	-0.03914845177136028	na
BALB	no motif/spacing effect	0.15809610321452006	na
BALB	no motif/spacing effect	-0.2732555964893679	na
BALB	no motif/spacing effect	-1.1910092977722493	na
BALB	no motif/spacing effect	-0.2599364594272249	na
BALB	no motif/spacing effect	-0.09340885332344939	na
BALB	no motif/spacing effect	-0.24212229506152205	na
BALB	no motif/spacing effect	-0.1406286695319876	na
BALB	no motif/spacing effect	-0.6936984151076064	na
BALB	no motif/spacing effect	0.4039967553942869	na
BALB	no motif/spacing effect	-0.23676559168625122	na
BALB	no motif/spacing effect	-0.216863021032359	na
BALB	no motif/spacing effect	-0.7049862468859045	na
BALB	no motif/spacing effect	-0.6142628539777721	na
BALB	no motif/spacing effect	0.1794205246151277	na
BALB	no motif/spacing effect	-0.10660524687570438	na
BALB	no motif/spacing effect	-0.30668150605574507	na
BALB	no motif/spacing effect	-0.13278517790090882	na
BALB	no motif/spacing effect	0.6603402256991941	na
BALB	no motif/spacing effect	0.5862339601826534	na
BALB	no motif/spacing effect	-0.39322620708653666	na
BALB	no motif/spacing effect	0.6487563382880821	na
BALB	no motif/spacing effect	0.5719690621785531	na
BALB	no motif/spacing effect	0.3246424795843983	na
BALB	no motif/spacing effect	0.35701991128576704	na
BALB	no motif/spacing effect	-0.2791156364828691	na
BALB	no motif/spacing effect	-0.6902032650486918	na
BALB	no motif/spacing effect	-0.18523567024456256	na
BALB	no motif/spacing effect	1.1632766254329465	na
BALB	no motif/spacing effect	1.0249559468288694	na
BALB	no motif/spacing effect	-0.37342256152039166	na
BALB	no motif/spacing effect	-0.6728000648781656	na
BALB	no motif/spacing effect	-0.9831393284576793	na
BALB	no motif/spacing effect	-0.9096444704361337	na
BALB	no motif/spacing effect	0.3441428287028887	na
BALB	no motif/spacing effect	-0.19469365700394725	na
BALB	no motif/spacing effect	-0.5181080455176277	na
BALB	no motif/spacing effect	-0.38875051300380026	na
BALB	no motif/spacing effect	0.6581723476749328	na
BALB	no motif/spacing effect	-0.10454484481189841	na
BALB	no motif/spacing effect	0.5801273221997989	na
BALB	no motif/spacing effect	0.5248970456014055	na
BALB	no motif/spacing effect	0.6576729728781707	na
BALB	no motif/spacing effect	0.0789978384749137	na
BALB	no motif/spacing effect	-0.13413667265153606	na
BALB	no motif/spacing effect	0.2262447468320543	na
BALB	no motif/spacing effect	-0.41713117960612234	na
BALB	no motif/spacing effect	-0.4220465577982071	na
BALB	no motif/spacing effect	0.817067233270671	na
BALB	no motif/spacing effect	0.16383688225677417	na
BALB	no motif/spacing effect	0.3238935218058314	na
BALB	no motif/spacing effect	-0.7638599818501417	na
BALB	no motif/spacing effect	0.2825305814595911	na
BALB	no motif/spacing effect	0.9057378014200896	na
BALB	no motif/spacing effect	-0.36697726165575784	na
BALB	no motif/spacing effect	-0.5555658282023845	na
BALB	no motif/spacing effect	0.6652038708953398	na
BALB	no motif/spacing effect	-0.856864608170735	na
BALB	no motif/spacing effect	-0.26122538360192005	na
BALB	no motif/spacing effect	0.021496140416679133	na
BALB	no motif/spacing effect	0.424641151449368	na
BALB	no motif/spacing effect	-0.24050403434320877	na
BALB	no motif/spacing effect	-0.13306355641158252	na
BALB	no motif/spacing effect	-0.6901824275047179	na
BALB	no motif/spacing effect	0.6261243248940564	na
BALB	no motif/spacing effect	-0.3044361569099392	na
BALB	no motif/spacing effect	-0.4802329373595695	na
BALB	no motif/spacing effect	0.13753258485644348	na
BALB	no motif/spacing effect	0.013574924728834148	na
BALB	no motif/spacing effect	-0.4552647495769504	na
BALB	no motif/spacing effect	-0.8213419510625908	na
BALB	no motif/spacing effect	-0.07355530519305464	na
BALB	no motif/spacing effect	-0.43002371293456765	na
BALB	no motif/spacing effect	0.11825802581833056	na
BALB	no motif/spacing effect	-0.00928563342203148	na
BALB	no motif/spacing effect	-0.4630588465225065	na
BALB	no motif/spacing effect	-0.2062542111356782	na
BALB	no motif/spacing effect	-0.7997203559766906	na
BALB	no motif/spacing effect	-0.6043989801855663	na
BALB	no motif/spacing effect	-0.1434696638819135	na
BALB	no motif/spacing effect	-0.4524368844730393	na
BALB	no motif/spacing effect	-0.15169962553224092	na
BALB	no motif/spacing effect	0.14453674065612176	na
BALB	no motif/spacing effect	-0.48623448155441107	na
BALB	no motif/spacing effect	-0.7488613868377669	na
BALB	no motif/spacing effect	-0.8974742091789523	na
BALB	no motif/spacing effect	-1.0539948896407294	na
BALB	no motif/spacing effect	0.0746926045010019	na
BALB	no motif/spacing effect	-0.25981410306615116	na
BALB	no motif/spacing effect	-0.18280464990491474	na
BALB	no motif/spacing effect	-0.53700362032541	na
BALB	no motif/spacing effect	-0.2391956405417388	na
BALB	no motif/spacing effect	-0.06876416276954522	na
BALB	no motif/spacing effect	-0.9019431661996133	na
BALB	no motif/spacing effect	-0.2235985200893369	na
BALB	no motif/spacing effect	-0.1182672443652324	na
BALB	no motif/spacing effect	-0.5067536683704592	na
BALB	no motif/spacing effect	-0.24532733657599604	na
BALB	no motif/spacing effect	0.19235690970971753	na
BALB	no motif/spacing effect	-0.32952156479100125	na
BALB	no motif/spacing effect	-0.08398949289780511	na
BALB	no motif/spacing effect	-0.4984497107507142	na
BALB	no motif/spacing effect	-0.1261771060771446	na
BALB	no motif/spacing effect	1.312357943436591	na
BALB	no motif/spacing effect	-0.07560101331498181	na
BALB	no motif/spacing effect	-0.6854110616192273	na
BALB	no motif/spacing effect	-0.1666498694094516	na
BALB	no motif/spacing effect	-0.24610400988391667	na
BALB	no motif/spacing effect	0.25592548332416376	na
BALB	no motif/spacing effect	0.18652990854639384	na
BALB	no motif/spacing effect	0.1375035237499347	na
BALB	no motif/spacing effect	0.1390203732941866	na
BALB	no motif/spacing effect	0.3386755386232889	na
BALB	no motif/spacing effect	-0.012629004031537328	na
BALB	no motif/spacing effect	-0.7224288803807486	na
BALB	no motif/spacing effect	-0.5724038202757393	na
BALB	no motif/spacing effect	0.113707582066636	na
BALB	no motif/spacing effect	-0.47279247576047556	na
BALB	no motif/spacing effect	-0.9087720341390213	na
BALB	no motif/spacing effect	-0.7100333905138765	na
BALB	no motif/spacing effect	-0.5907275235409184	na
BALB	no motif/spacing effect	0.3082691599640577	na
BALB	no motif/spacing effect	-0.6090273827496295	na
BALB	no motif/spacing effect	-0.08529966825532176	na
BALB	no motif/spacing effect	0.1328118284252131	na
BALB	no motif/spacing effect	0.5138818522587334	na
BALB	no motif/spacing effect	-0.3387384885274356	na
BALB	no motif/spacing effect	-0.5095457271448378	na
BALB	no motif/spacing effect	-1.1983839563496836	na
BALB	no motif/spacing effect	0.48750713761128894	na
BALB	no motif/spacing effect	-0.487071481470422	na
BALB	no motif/spacing effect	-0.29327715783695396	na
BALB	no motif/spacing effect	-0.47411914938288824	na
BALB	no motif/spacing effect	-0.9099419996393037	na
BALB	no motif/spacing effect	0.14403407571901639	na
BALB	no motif/spacing effect	-0.13632147121278004	na
BALB	no motif/spacing effect	-0.4436592027919506	na
BALB	no motif/spacing effect	0.4474589769712214	na
BALB	no motif/spacing effect	-0.2426963075221682	na
BALB	no motif/spacing effect	-0.1552069337505282	na
BALB	no motif/spacing effect	0.0009026434886765244	na
BALB	no motif/spacing effect	0.15517890986275606	na
BALB	no motif/spacing effect	-0.9333359473924991	na
BALB	no motif/spacing effect	-1.000781990935125	na
BALB	no motif/spacing effect	0.1061401864168694	na
BALB	no motif/spacing effect	-0.3934795454249853	na
BALB	no motif/spacing effect	-0.2265708110303395	na
BALB	no motif/spacing effect	0.5063526660247897	na
BALB	no motif/spacing effect	0.46438083460903057	na
BALB	no motif/spacing effect	1.2360673582335244	na
BALB	no motif/spacing effect	1.5971372146672587	na
BALB	no motif/spacing effect	2.04694583574912	na
BALB	no motif/spacing effect	-0.3679398705184287	na
BALB	no motif/spacing effect	0.6338721012021029	na
BALB	no motif/spacing effect	-0.5736958685202911	na
BALB	no motif/spacing effect	-0.13408885933717052	na
BALB	no motif/spacing effect	0.35073494294773866	na
BALB	no motif/spacing effect	0.23553377625201932	na
BALB	no motif/spacing effect	0.4456495293205087	na
BALB	no motif/spacing effect	1.4483679521399373	na
BALB	no motif/spacing effect	0.14986296233637875	na
BALB	no motif/spacing effect	0.11902978026132782	na
BALB	no motif/spacing effect	0.7688609040070018	na
BALB	no motif/spacing effect	0.30533739504013546	na
BALB	no motif/spacing effect	-0.3758799678169078	na
BALB	no motif/spacing effect	-0.10680419464134605	na
BALB	no motif/spacing effect	-0.6155974129020949	na
BALB	no motif/spacing effect	-0.6907738828233856	na
BALB	no motif/spacing effect	-1.0612160686021461	na
BALB	no motif/spacing effect	-0.7337058316719407	na
BALB	no motif/spacing effect	-0.43872163545279186	na
BALB	no motif/spacing effect	0.736627686905992	na
BALB	no motif/spacing effect	-1.1536484949543473	na
BALB	no motif/spacing effect	-0.391293243701913	na
BALB	no motif/spacing effect	0.15423301757815544	na
BALB	no motif/spacing effect	-0.42883287655173685	na
BALB	no motif/spacing effect	-0.28800782051409435	na
BALB	no motif/spacing effect	-0.3627684561524167	na
BALB	no motif/spacing effect	0.1066380444900048	na
BALB	no motif/spacing effect	-0.3798677470521046	na
BALB	no motif/spacing effect	0.6363221351232906	na
BALB	no motif/spacing effect	-0.04689562522446167	na
BALB	no motif/spacing effect	0.2374581591277778	na
BALB	no motif/spacing effect	0.8534685757214828	na
BALB	no motif/spacing effect	-0.0983329264692574	na
BALB	no motif/spacing effect	-0.6227288712688628	na
BALB	no motif/spacing effect	0.026962292907466434	na
BALB	no motif/spacing effect	0.37295177290735104	na
BALB	no motif/spacing effect	0.296856619662619	na
BALB	no motif/spacing effect	0.5129807423401829	na
BALB	no motif/spacing effect	0.5109958016630562	na
BALB	no motif/spacing effect	-0.625268035813785	na
BALB	no motif/spacing effect	-0.4069653857327511	na
BALB	no motif/spacing effect	0.5683532337549497	na
BALB	no motif/spacing effect	-0.1423233783252238	na
BALB	no motif/spacing effect	-0.17728900155128802	na
BALB	no motif/spacing effect	0.6709906679437796	na
BALB	no motif/spacing effect	-0.2859684301588077	na
BALB	no motif/spacing effect	-0.550852038879805	na
BALB	no motif/spacing effect	2.11047115123207	na
BALB	no motif/spacing effect	0.006919413939790786	na
BALB	no motif/spacing effect	0.13566945960462817	na
BALB	no motif/spacing effect	-0.2309527332927157	na
BALB	no motif/spacing effect	0.8250360812236663	na
BALB	no motif/spacing effect	0.49947708912759303	na
BALB	no motif/spacing effect	-0.20569096433903833	na
BALB	no motif/spacing effect	0.18120146078003252	na
BALB	no motif/spacing effect	0.12106208812961317	na
BALB	no motif/spacing effect	0.0016012155260654026	na
BALB	no motif/spacing effect	-0.8166599355219537	na
BALB	no motif/spacing effect	0.09839192556443033	na
BALB	no motif/spacing effect	-0.37128546744007185	na
BALB	no motif/spacing effect	1.2358723353753653	na
BALB	no motif/spacing effect	-0.024649751058126057	na
BALB	no motif/spacing effect	-0.7922814411342367	na
BALB	no motif/spacing effect	-0.29572123243693493	na
BALB	no motif/spacing effect	-0.27469442300637104	na
BALB	no motif/spacing effect	-0.1554801301730535	na
BALB	no motif/spacing effect	-1.2590079029664412	na
BALB	no motif/spacing effect	-1.8474462145458523	na
BALB	no motif/spacing effect	-0.4820988094524872	na
BALB	no motif/spacing effect	-1.1572790069448748	na
BALB	no motif/spacing effect	-1.1258907328089887	na
BALB	no motif/spacing effect	0.8482592385932928	na
BALB	no motif/spacing effect	-0.036095798501914356	na
BALB	no motif/spacing effect	0.7327690961787483	na
BALB	no motif/spacing effect	-0.6566204229611294	na
BALB	no motif/spacing effect	-0.8318468849609983	na
BALB	no motif/spacing effect	-0.7151026360576043	na
BALB	no motif/spacing effect	-0.8855310257134823	na
BALB	no motif/spacing effect	-0.7369655941662066	na
BALB	no motif/spacing effect	-0.6471565316452228	na
BALB	no motif/spacing effect	-0.30220209735794157	na
BALB	no motif/spacing effect	-0.8424095700600143	na
BALB	no motif/spacing effect	-0.9003487305160975	na
BALB	no motif/spacing effect	-0.3450322459002102	na
BALB	no motif/spacing effect	-0.44365979039312897	na
BALB	no motif/spacing effect	-0.37222727084019347	na
BALB	no motif/spacing effect	-0.37604566888910984	na
BALB	no motif/spacing effect	-0.12354506616001526	na
BALB	no motif/spacing effect	-0.09542327022972774	na
BALB	no motif/spacing effect	-0.33255163185644143	na
BALB	no motif/spacing effect	-0.11339804418464272	na
BALB	no motif/spacing effect	-0.3261541366263705	na
BALB	no motif/spacing effect	-0.11055378097986068	na
BALB	no motif/spacing effect	-0.6039473150983028	na
BALB	no motif/spacing effect	-0.5405802753171107	na
BALB	no motif/spacing effect	-0.7394338497569564	na
BALB	no motif/spacing effect	0.003256649330704242	na
BALB	no motif/spacing effect	-0.006189936119198158	na
BALB	no motif/spacing effect	0.8776573955471885	na
BALB	no motif/spacing effect	1.738386807143001	na
BALB	no motif/spacing effect	0.21280761923210356	na
BALB	no motif/spacing effect	-0.14048418644267002	na
BALB	no motif/spacing effect	-0.42506672366098286	na
BALB	no motif/spacing effect	-0.23084490376151479	na
BALB	no motif/spacing effect	-0.05368444962346164	na
BALB	no motif/spacing effect	0.07269948857859898	na
BALB	no motif/spacing effect	1.0476244367593037	na
BALB	no motif/spacing effect	0.13676905173812148	na
BALB	no motif/spacing effect	-0.204349162476956	na
BALB	no motif/spacing effect	-0.0954910101444888	na
BALB	no motif/spacing effect	-0.6846656984112611	na
BALB	no motif/spacing effect	-0.5484097210411658	na
BALB	no motif/spacing effect	-0.6173115674135099	na
BALB	no motif/spacing effect	-0.2743502843667134	na
BALB	no motif/spacing effect	-0.24268756587688678	na
BALB	no motif/spacing effect	0.23958139186330252	na
BALB	no motif/spacing effect	-0.28498793179602	na
BALB	no motif/spacing effect	-0.1838060523537246	na
BALB	no motif/spacing effect	0.052727572275900414	na
BALB	no motif/spacing effect	-0.11913747276888209	na
BALB	no motif/spacing effect	0.29302459057743757	na
BALB	no motif/spacing effect	-0.07322257862948156	na
BALB	no motif/spacing effect	0.07494794481270173	na
BALB	no motif/spacing effect	-0.29530182585795384	na
BALB	no motif/spacing effect	-0.3795514823976607	na
BALB	no motif/spacing effect	-0.043008119412830226	na
BALB	no motif/spacing effect	-0.1648656767929877	na
BALB	no motif/spacing effect	-0.2154781092882252	na
BALB	no motif/spacing effect	-0.6822922034568482	na
BALB	no motif/spacing effect	-0.5161768818495771	na
BALB	no motif/spacing effect	-0.03979805640022516	na
BALB	no motif/spacing effect	-0.8479085359052707	na
BALB	no motif/spacing effect	-0.2645949198214108	na
BALB	no motif/spacing effect	0.336732985007123	na
BALB	no motif/spacing effect	0.5584902893599653	na
BALB	no motif/spacing effect	0.5787604894767306	na
BALB	no motif/spacing effect	-0.28420842893820364	na
BALB	no motif/spacing effect	-0.7773159052874181	na
BALB	no motif/spacing effect	-0.08500435475442591	na
BALB	no motif/spacing effect	0.11206680142719594	na
BALB	no motif/spacing effect	-0.08471333384539115	na
BALB	no motif/spacing effect	0.24090024654961706	na
BALB	no motif/spacing effect	0.14704602882676854	na
BALB	no motif/spacing effect	0.03658297364354102	na
BALB	no motif/spacing effect	-0.09538550269945567	na
BALB	no motif/spacing effect	0.6264312754772288	na
BALB	no motif/spacing effect	-0.280745856431027	na
BALB	no motif/spacing effect	0.7413213728841739	na
BALB	no motif/spacing effect	-0.736167775730296	na
BALB	no motif/spacing effect	-0.44550278000589527	na
BALB	no motif/spacing effect	-0.4036997333364045	na
BALB	no motif/spacing effect	0.2776256304980249	na
BALB	no motif/spacing effect	-0.24125144858776437	na
BALB	no motif/spacing effect	0.3570419480312301	na
BALB	no motif/spacing effect	1.3535240323353	na
BALB	no motif/spacing effect	0.046588978872784015	na
BALB	no motif/spacing effect	0.8904921062604361	na
BALB	no motif/spacing effect	-0.4543361441001794	na
BALB	no motif/spacing effect	-0.4203873307449628	na
BALB	no motif/spacing effect	0.10493058996158222	na
BALB	no motif/spacing effect	0.2547597273535116	na
BALB	no motif/spacing effect	-0.3246803029082317	na
BALB	no motif/spacing effect	1.1633596840401919	na
BALB	no motif/spacing effect	-0.7082940535269004	na
BALB	no motif/spacing effect	-0.32307397369150426	na
BALB	no motif/spacing effect	-0.38064199765608375	na
BALB	no motif/spacing effect	-0.2609042610478589	na
BALB	no motif/spacing effect	-0.3778896175179334	na
BALB	no motif/spacing effect	-0.3428750333322741	na
BALB	no motif/spacing effect	-0.3401314787576162	na
BALB	no motif/spacing effect	-0.14092220188096327	na
BALB	no motif/spacing effect	-0.04077803004800451	na
BALB	no motif/spacing effect	0.5794980971158621	na
BALB	no motif/spacing effect	-0.454311634911134	na
BALB	no motif/spacing effect	-0.624852399416306	na
BALB	no motif/spacing effect	-0.4420183996993865	na
BALB	no motif/spacing effect	-0.6733477309417717	na
BALB	no motif/spacing effect	0.8252104273730358	na
BALB	no motif/spacing effect	-0.14816989222806232	na
BALB	no motif/spacing effect	0.6907134486213784	na
BALB	no motif/spacing effect	0.22421515694326644	na
BALB	no motif/spacing effect	0.013528888271251205	na
BALB	no motif/spacing effect	1.9278080065242147	na
BALB	no motif/spacing effect	0.059404287197595274	na
BALB	no motif/spacing effect	-0.6611833085968568	na
BALB	no motif/spacing effect	-0.0516305365215155	na
BALB	no motif/spacing effect	1.05999596470191	na
BALB	no motif/spacing effect	1.5926804138819932	na
BALB	no motif/spacing effect	-0.5246128448063248	na
BALB	no motif/spacing effect	-0.3254675383021448	na
BALB	no motif/spacing effect	-0.09840924442836041	na
BALB	no motif/spacing effect	0.06863624401687396	na
BALB	no motif/spacing effect	-0.8528641799503953	na
BALB	no motif/spacing effect	-0.5907874864173097	na
BALB	no motif/spacing effect	-0.46685476879832954	na
BALB	no motif/spacing effect	-0.043728502746535725	na
BALB	no motif/spacing effect	0.4029391570468155	na
BALB	no motif/spacing effect	-0.14047832071467692	na
BALB	no motif/spacing effect	-0.3763557662757213	na
BALB	no motif/spacing effect	-0.3858808191646448	na
BALB	no motif/spacing effect	-0.43780397533407545	na
BALB	no motif/spacing effect	-0.4085941668400501	na
BALB	no motif/spacing effect	0.7592134275662588	na
BALB	no motif/spacing effect	0.5556469338966004	na
BALB	no motif/spacing effect	-0.13996147243399104	na
BALB	no motif/spacing effect	-0.03553965902509848	na
BALB	no motif/spacing effect	-0.8761064101039628	na
BALB	no motif/spacing effect	0.7484612330040354	na
BALB	no motif/spacing effect	0.05829864056466705	na
BALB	no motif/spacing effect	-0.05263150235560232	na
BALB	no motif/spacing effect	-0.5925231362491581	na
BALB	no motif/spacing effect	-0.47204848282094947	na
BALB	no motif/spacing effect	0.9801135047138037	na
BALB	no motif/spacing effect	-0.4186760763421917	na
BALB	no motif/spacing effect	-0.4881753876156303	na
BALB	no motif/spacing effect	-0.872943263685181	na
[truncated: 74,553 more rows]
