# Supplementary material for: Systematic analysis of naturally occurring insertions and deletions that alter transcription factor spacing identifies tolerant and sensitive transcription factor pairs
Source: eLife. 2022 Jan 20;11:e70878. doi: 10.7554/eLife.70878 (PMC8809895; doi:10.7554/eLife.70878)
Supplement: Figure 4—source data 1. [file elife-70878-fig4-data1.csv]

VariantID	Chrom	Start	End	Strand	Effect size beta	Qvalue	group
chr10:126817841_C_T	chr10	126817741	126817941	+	-0.18555	0.019239915	mutated ERG and p65 motif
chr11:70273999_AT_A	chr11	70273899	70274099	+	0.187024	0.036287589	mutated ERG and p65 motif
chr12:3239461_G_A	chr12	3239361	3239561	+	-0.159812	0.009991587	mutated ERG and p65 motif
chr12:91473798_G_A	chr12	91473698	91473898	+	-0.18709	0.019694767	mutated ERG and p65 motif
chr13:43952370_C_T	chr13	43952270	43952470	+	-0.161931	0.00240253	mutated ERG and p65 motif
chr15:71081050_T_C	chr15	71080950	71081150	+	0.227363	0.002005941	mutated ERG and p65 motif
chr16:16099878_G_A	chr16	16099778	16099978	+	-0.192395	0.006225119	mutated ERG and p65 motif
chr17:27922275_A_G	chr17	27922175	27922375	+	-0.334187	3.09E-07	mutated ERG and p65 motif
chr1:212965095_G_A	chr1	212964995	212965195	+	0.144869	0.016866538	mutated ERG and p65 motif
chr21:20145459_T_C	chr21	20145359	20145559	+	0.269687	7.22E-05	mutated ERG and p65 motif
chr21:40247888_G_C	chr21	40247788	40247988	+	-0.205219	0.006806452	mutated ERG and p65 motif
chr22:19983213_C_T	chr22	19983113	19983313	+	-0.17639	0.022529571	mutated ERG and p65 motif
chr2:191656929_T_C	chr2	191656829	191657029	+	0.184131	0.000203937	mutated ERG and p65 motif
chr2:216696316_G_A	chr2	216696216	216696416	+	-0.258525	1.25E-05	mutated ERG and p65 motif
chr3:171095834_A_C	chr3	171095734	171095934	+	-0.347604	0.000267411	mutated ERG and p65 motif
chr4:147878581_C_G	chr4	147878481	147878681	+	-0.368419	4.15E-09	mutated ERG and p65 motif
chr4:3307638_C_G	chr4	3307538	3307738	+	-0.220579	1.28E-07	mutated ERG and p65 motif
chr5:71578902_A_G	chr5	71578802	71579002	+	0.222194	0.000674774	mutated ERG and p65 motif
chr6:132970149_C_A	chr6	132970049	132970249	+	0.09247	0.045505374	mutated ERG and p65 motif
chr6:134768224_C_A	chr6	134768124	134768324	+	-0.178712	0.02561501	mutated ERG and p65 motif
chr7:110214134_T_C	chr7	110214034	110214234	+	0.250421	0.001360636	mutated ERG and p65 motif
chr7:95939585_T_C	chr7	95939485	95939685	+	-0.210277	0.002067906	mutated ERG and p65 motif
chr8:119859675_T_G	chr8	119859575	119859775	+	0.169189	0.048721432	mutated ERG and p65 motif
chr8:40246554_A_G	chr8	40246454	40246654	+	0.286814	0.000375041	mutated ERG and p65 motif
chr10:105814459_A_C	chr10	105814359	105814559	+	0.145801	0.008773888	mutated p65 motif
chr10:116555996_G_A	chr10	116555896	116556096	+	0.154421	0.048486659	mutated p65 motif
chr10:119256212_G_C	chr10	119256112	119256312	+	-0.190353	0.015007929	mutated p65 motif
chr10:125757321_T_C	chr10	125757221	125757421	+	0.170399	0.041749304	mutated p65 motif
chr10:17250230_C_G	chr10	17250130	17250330	+	0.128619	0.028970733	mutated p65 motif
chr10:17250261_C_G	chr10	17250161	17250361	+	-0.222535	0.002562107	mutated p65 motif
chr10:24639315_G_A	chr10	24639215	24639415	+	-0.217697	0.000552864	mutated p65 motif
chr10:27672902_TA_T	chr10	27672802	27673002	+	-0.176836	0.001228772	mutated p65 motif
chr10:32499938_C_T	chr10	32499838	32500038	+	-0.201994	0.0001095	mutated p65 motif
chr10:35020982_G_A	chr10	35020882	35021082	+	-0.097241	0.019164787	mutated p65 motif
chr10:52364839_C_T	chr10	52364739	52364939	+	-0.143422	0.035415217	mutated p65 motif
chr10:61296617_C_G	chr10	61296517	61296717	+	0.217048	0.002504498	mutated p65 motif
chr10:90039357_A_AAGGAAATGAATCTC	chr10	90039257	90039457	+	0.267894	0.000172023	mutated p65 motif
chr10:91349049_G_T	chr10	91348949	91349149	+	0.215393	0.015015384	mutated p65 motif
chr10:99121361_C_T	chr10	99121261	99121461	+	0.177136	0.000612936	mutated p65 motif
chr11:112394430_A_G	chr11	112394330	112394530	+	0.190103	0.049648916	mutated p65 motif
chr11:113255574_A_T	chr11	113255474	113255674	+	-0.103514	0.005678215	mutated p65 motif
chr11:123275496_C_T	chr11	123275396	123275596	+	0.230758	0.003096447	mutated p65 motif
chr11:23495582_A_G	chr11	23495482	23495682	+	-0.12441	0.041467738	mutated p65 motif
chr11:30344883_G_C	chr11	30344783	30344983	+	-0.156514	0.020207424	mutated p65 motif
chr11:65249145_A_G	chr11	65249045	65249245	+	-0.159479	0.004041011	mutated p65 motif
chr12:121608663_G_C	chr12	121608563	121608763	+	-0.199981	0.029873066	mutated p65 motif
chr12:43636072_A_G	chr12	43635972	43636172	+	0.183239	0.01693598	mutated p65 motif
chr12:53439139_T_A	chr12	53439039	53439239	+	0.191058	0.010615284	mutated p65 motif
chr12:5877506_A_C	chr12	5877406	5877606	+	0.300655	1.31E-05	mutated p65 motif
chr12:68753849_A_G	chr12	68753749	68753949	+	0.186833	0.013017659	mutated p65 motif
chr12:93924410_C_T	chr12	93924310	93924510	+	-0.162268	0.002226644	mutated p65 motif
chr12:95567809_G_A	chr12	95567709	95567909	+	-0.171747	0.023363273	mutated p65 motif
chr13:103291111_T_G	chr13	103291011	103291211	+	0.198045	0.000222478	mutated p65 motif
chr13:21066950_T_A	chr13	21066850	21067050	+	-0.168189	0.011425579	mutated p65 motif
chr13:28876214_T_C	chr13	28876114	28876314	+	-0.25642	0.00023935	mutated p65 motif
chr13:33833178_C_A	chr13	33833078	33833278	+	0.168417	0.010700704	mutated p65 motif
chr13:64762005_T_C	chr13	64761905	64762105	+	-0.270602	0.000232025	mutated p65 motif
chr14:50863510_G_A	chr14	50863410	50863610	+	0.134248	0.004140888	mutated p65 motif
chr14:53680562_C_T	chr14	53680462	53680662	+	0.184246	0.023182781	mutated p65 motif
chr14:54831541_A_C	chr14	54831441	54831641	+	-0.129164	0.01852643	mutated p65 motif
chr14:70850012_A_G	chr14	70849912	70850112	+	-0.218506	0.012356972	mutated p65 motif
chr14:77278030_C_T	chr14	77277930	77278130	+	-0.142245	0.049997811	mutated p65 motif
chr14:77507205_G_T	chr14	77507105	77507305	+	-0.083059	0.045422116	mutated p65 motif
chr14:78129840_T_G	chr14	78129740	78129940	+	0.268648	0.000570242	mutated p65 motif
chr14:93775028_A_C	chr14	93774928	93775128	+	-0.188746	0.006519881	mutated p65 motif
chr14:95503828_C_T	chr14	95503728	95503928	+	0.16666	0.034423913	mutated p65 motif
chr14:96014135_A_G	chr14	96014035	96014235	+	0.199739	0.00191128	mutated p65 motif
chr15:100007152_G_T	chr15	100007052	100007252	+	0.123873	0.029320446	mutated p65 motif
chr15:100007155_T_C	chr15	100007055	100007255	+	0.244394	5.17E-05	mutated p65 motif
chr15:55513680_G_A	chr15	55513580	55513780	+	-0.164995	0.018680436	mutated p65 motif
chr15:82452471_C_A	chr15	82452371	82452571	+	0.130381	0.037449071	mutated p65 motif
chr15:90637450_T_A	chr15	90637350	90637550	+	0.164136	0.0060847	mutated p65 motif
chr15:95752531_C_G	chr15	95752431	95752631	+	-0.147814	0.015342706	mutated p65 motif
chr16:50739582_C_G	chr16	50739482	50739682	+	0.139412	0.018703213	mutated p65 motif
chr16:81512760_C_T	chr16	81512660	81512860	+	-0.123626	0.035875103	mutated p65 motif
chr16:81658642_T_C	chr16	81658542	81658742	+	0.247043	0.003936537	mutated p65 motif
chr16:86423251_A_G	chr16	86423151	86423351	+	-0.193441	0.00630069	mutated p65 motif
chr17:17349495_G_A	chr17	17349395	17349595	+	-0.174325	1.24E-05	mutated p65 motif
chr17:3563339_C_T	chr17	3563239	3563439	+	0.185063	0.00274283	mutated p65 motif
chr17:42210189_C_A	chr17	42210089	42210289	+	0.173911	0.004411103	mutated p65 motif
chr17:63439608_A_T	chr17	63439508	63439708	+	0.151736	0.049230399	mutated p65 motif
chr17:80760223_A_C	chr17	80760123	80760323	+	0.163842	0.008462036	mutated p65 motif
chr19:45699289_C_G	chr19	45699189	45699389	+	0.225319	0.003657494	mutated p65 motif
chr19:51523203_T_C	chr19	51523103	51523303	+	0.181071	0.012521925	mutated p65 motif
chr19:52692623_G_A	chr19	52692523	52692723	+	0.156794	0.034407474	mutated p65 motif
chr1:110441687_A_C	chr1	110441587	110441787	+	-0.18382	0.03607139	mutated p65 motif
chr1:113573874_A_T	chr1	113573774	113573974	+	0.142727	0.009049773	mutated p65 motif
chr1:150584103_G_T	chr1	150584003	150584203	+	-0.08929	0.026708239	mutated p65 motif
chr1:156737969_C_T	chr1	156737869	156738069	+	0.160149	0.017148258	mutated p65 motif
chr1:178511941_A_C	chr1	178511841	178512041	+	0.100312	0.048557686	mutated p65 motif
chr1:33407447_C_A	chr1	33407347	33407547	+	0.17776	0.001171702	mutated p65 motif
chr1:38461821_C_T	chr1	38461721	38461921	+	-0.144637	0.0085847	mutated p65 motif
chr1:44240221_G_A	chr1	44240121	44240321	+	-0.196549	0.008087837	mutated p65 motif
chr1:56055448_G_C	chr1	56055348	56055548	+	0.186653	0.013920558	mutated p65 motif
chr1:59875451_T_C	chr1	59875351	59875551	+	0.343607	1.24E-06	mutated p65 motif
chr1:62102167_G_C	chr1	62102067	62102267	+	-0.143554	0.042597423	mutated p65 motif
chr1:70377148_G_T	chr1	70377048	70377248	+	0.145304	0.046552734	mutated p65 motif
chr1:98883541_A_G	chr1	98883441	98883641	+	0.160206	0.03534489	mutated p65 motif
chr20:2199055_G_GACACACACTTCTAAA	chr20	2198955	2199155	+	0.270947	0.000217489	mutated p65 motif
chr20:23044358_A_G	chr20	23044258	23044458	+	-0.241515	0.00013218	mutated p65 motif
chr20:34329547_A_G	chr20	34329447	34329647	+	0.184462	0.001930737	mutated p65 motif
chr20:352717_A_G	chr20	352617	352817	+	0.086814	0.002186015	mutated p65 motif
chr20:6693128_C_T	chr20	6693028	6693228	+	0.240142	6.65E-06	mutated p65 motif
chr20:8030977_T_C	chr20	8030877	8031077	+	0.125837	0.012486279	mutated p65 motif
chr21:16084376_C_T	chr21	16084276	16084476	+	0.150484	0.036447402	mutated p65 motif
chr22:17883957_G_T	chr22	17883857	17884057	+	-0.324386	5.26E-07	mutated p65 motif
chr22:23619461_C_T	chr22	23619361	23619561	+	0.193486	0.00796076	mutated p65 motif
chr2:10130973_T_G	chr2	10130873	10131073	+	-0.135617	0.029101814	mutated p65 motif
chr2:105654716_C_T	chr2	105654616	105654816	+	0.109515	0.013951705	mutated p65 motif
chr2:159523880_C_A	chr2	159523780	159523980	+	0.12072	0.017774154	mutated p65 motif
chr2:16031488_G_A	chr2	16031388	16031588	+	-0.273452	2.52E-05	mutated p65 motif
chr2:166226214_A_G	chr2	166226114	166226314	+	0.212152	0.028990129	mutated p65 motif
chr2:178287945_A_G	chr2	178287845	178288045	+	-0.229209	0.004291969	mutated p65 motif
chr2:190192867_G_A	chr2	190192767	190192967	+	0.207026	3.06E-06	mutated p65 motif
chr2:20842327_G_A	chr2	20842227	20842427	+	-0.141519	0.038130251	mutated p65 motif
chr2:224685361_T_C	chr2	224685261	224685461	+	-0.201618	2.72E-05	mutated p65 motif
chr2:224824617_A_G	chr2	224824517	224824717	+	0.150579	0.013753604	mutated p65 motif
chr2:225803555_G_A	chr2	225803455	225803655	+	-0.119311	0.002069217	mutated p65 motif
chr2:237855744_T_A	chr2	237855644	237855844	+	-0.120317	6.30E-08	mutated p65 motif
chr2:45517342_C_T	chr2	45517242	45517442	+	-0.247036	0.001355622	mutated p65 motif
chr2:65308573_A_AAGC	chr2	65308473	65308673	+	0.137611	0.008762318	mutated p65 motif
chr2:67730416_T_C	chr2	67730316	67730516	+	0.127837	0.00037319	mutated p65 motif
chr2:69981295_G_A	chr2	69981195	69981395	+	-0.121407	0.038312253	mutated p65 motif
chr2:75823162_G_A	chr2	75823062	75823262	+	-0.221428	0.001582603	mutated p65 motif
chr2:85122407_C_T	chr2	85122307	85122507	+	-0.163087	0.001011644	mutated p65 motif
chr2:97089292_G_GA	chr2	97089192	97089392	+	0.185426	0.006556992	mutated p65 motif
chr3:104587383_A_T	chr3	104587283	104587483	+	0.197566	0.01059949	mutated p65 motif
chr3:116477045_C_A	chr3	116476945	116477145	+	-0.171417	0.038613051	mutated p65 motif
chr3:148675626_C_T	chr3	148675526	148675726	+	0.186042	0.006579196	mutated p65 motif
chr3:150222435_T_A	chr3	150222335	150222535	+	-0.280473	0.00010794	mutated p65 motif
chr3:16441167_G_T	chr3	16441067	16441267	+	0.243232	0.006080877	mutated p65 motif
chr3:179524225_A_G	chr3	179524125	179524325	+	0.238526	0.00171207	mutated p65 motif
chr3:183151490_T_C	chr3	183151390	183151590	+	0.275882	0.002658172	mutated p65 motif
chr3:190044797_C_T	chr3	190044697	190044897	+	-0.267512	0.000319206	mutated p65 motif
chr3:23587762_A_T	chr3	23587662	23587862	+	0.184532	0.007232589	mutated p65 motif
chr3:27038340_C_G	chr3	27038240	27038440	+	-0.176703	0.02649062	mutated p65 motif
chr3:30239767_G_A	chr3	30239667	30239867	+	-0.125009	0.012363316	mutated p65 motif
chr3:33468329_G_T	chr3	33468229	33468429	+	-0.139264	0.029578861	mutated p65 motif
chr3:65316052_G_A	chr3	65315952	65316152	+	0.21715	0.001680154	mutated p65 motif
chr3:98505529_T_G	chr3	98505429	98505629	+	0.157822	0.005834056	mutated p65 motif
chr3:99353985_T_G	chr3	99353885	99354085	+	0.268586	2.57E-05	mutated p65 motif
chr4:106108032_G_C	chr4	106107932	106108132	+	0.170763	0.006565069	mutated p65 motif
chr4:119737885_T_C	chr4	119737785	119737985	+	-0.109656	0.014920848	mutated p65 motif
chr4:177804404_G_T	chr4	177804304	177804504	+	0.199703	0.002813257	mutated p65 motif
chr4:21782045_G_A	chr4	21781945	21782145	+	0.193915	0.004875788	mutated p65 motif
chr4:48073501_G_T	chr4	48073401	48073601	+	-0.196836	0.005169915	mutated p65 motif
chr4:74959996_A_G	chr4	74959896	74960096	+	-0.233057	3.32E-05	mutated p65 motif
chr4:89126434_C_T	chr4	89126334	89126534	+	-0.215105	0.002785224	mutated p65 motif
chr5:106466498_T_C	chr5	106466398	106466598	+	-0.193826	0.002170727	mutated p65 motif
chr5:126114085_C_T	chr5	126113985	126114185	+	0.085944	0.038963291	mutated p65 motif
chr5:126437419_T_C	chr5	126437319	126437519	+	-0.191483	4.27E-05	mutated p65 motif
chr5:131515413_C_T	chr5	131515313	131515513	+	-0.114378	0.039024442	mutated p65 motif
chr5:15604995_G_A	chr5	15604895	15605095	+	0.219175	0.006911747	mutated p65 motif
chr5:39429049_C_T	chr5	39428949	39429149	+	0.324015	1.77E-06	mutated p65 motif
chr5:55705457_C_T	chr5	55705357	55705557	+	-0.203763	5.13E-07	mutated p65 motif
chr5:72451804_G_A	chr5	72451704	72451904	+	-0.259086	0.000319211	mutated p65 motif
chr5:73849983_T_G	chr5	73849883	73850083	+	-0.197342	0.010610514	mutated p65 motif
chr5:90397917_C_T	chr5	90397817	90398017	+	-0.16798	0.022777813	mutated p65 motif
chr6:131423233_C_T	chr6	131423133	131423333	+	0.24491	4.67E-05	mutated p65 motif
chr6:132655551_A_G	chr6	132655451	132655651	+	-0.191557	0.012205267	mutated p65 motif
chr6:137593756_G_T	chr6	137593656	137593856	+	0.13233	0.00289214	mutated p65 motif
chr6:150306968_T_A	chr6	150306868	150307068	+	0.190872	0.017071652	mutated p65 motif
chr6:150724853_T_C	chr6	150724753	150724953	+	0.200674	0.000203562	mutated p65 motif
chr6:153023151_G_A	chr6	153023051	153023251	+	0.121294	0.012098611	mutated p65 motif
chr6:30654531_G_C	chr6	30654431	30654631	+	-0.117062	0.019903075	mutated p65 motif
chr6:34273958_T_C	chr6	34273858	34274058	+	-0.152855	0.011261267	mutated p65 motif
chr6:37293764_T_G	chr6	37293664	37293864	+	-0.143722	0.03359138	mutated p65 motif
chr6:42210951_C_G	chr6	42210851	42211051	+	0.293276	0.000970253	mutated p65 motif
chr6:53820994_G_T	chr6	53820894	53821094	+	-0.146299	0.043193161	mutated p65 motif
chr7:107384127_G_A	chr7	107384027	107384227	+	-0.136777	0.008335145	mutated p65 motif
chr7:121088189_A_G	chr7	121088089	121088289	+	-0.110167	0.023729162	mutated p65 motif
chr7:14791368_C_T	chr7	14791268	14791468	+	-0.128125	0.027690163	mutated p65 motif
chr7:155005098_G_A	chr7	155004998	155005198	+	0.173146	0.000367012	mutated p65 motif
chr7:22973712_G_T	chr7	22973612	22973812	+	-0.147306	0.02356585	mutated p65 motif
chr7:5686742_T_C	chr7	5686642	5686842	+	0.297872	0.000292955	mutated p65 motif
chr7:92641079_C_G	chr7	92640979	92641179	+	0.129523	0.003345513	mutated p65 motif
chr7:97984077_C_T	chr7	97983977	97984177	+	-0.102592	0.047247594	mutated p65 motif
chr8:103801557_C_T	chr8	103801457	103801657	+	-0.14748	0.010720154	mutated p65 motif
chr8:117587332_A_T	chr8	117587232	117587432	+	-0.155182	0.029130135	mutated p65 motif
chr8:129269466_A_G	chr8	129269366	129269566	+	0.231129	3.82E-06	mutated p65 motif
chr8:131423040_G_A	chr8	131422940	131423140	+	0.233913	3.37E-05	mutated p65 motif
chr8:131654160_C_T	chr8	131654060	131654260	+	0.163564	0.031612115	mutated p65 motif
chr8:135498258_C_T	chr8	135498158	135498358	+	-0.265819	0.000140433	mutated p65 motif
chr8:23185099_C_T	chr8	23184999	23185199	+	0.14034	0.029058246	mutated p65 motif
chr8:70093514_T_C	chr8	70093414	70093614	+	0.189283	0.000432522	mutated p65 motif
chr9:103202590_T_C	chr9	103202490	103202690	+	0.172785	0.001403468	mutated p65 motif
chr9:111176217_A_G	chr9	111176117	111176317	+	0.157082	0.002387889	mutated p65 motif
chr9:111864294_G_GA	chr9	111864194	111864394	+	0.145878	0.00017166	mutated p65 motif
chr9:114729357_G_A	chr9	114729257	114729457	+	-0.162109	0.039782388	mutated p65 motif
chr9:139001679_C_T	chr9	139001579	139001779	+	0.114121	0.029209586	mutated p65 motif
chr10:101706017_A_G	chr10	101705917	101706117	+	0.153568	0.028793451	mutated ERG motif
chr10:105438112_T_C	chr10	105438012	105438212	+	0.26911	0.003103109	mutated ERG motif
chr10:1195959_T_C	chr10	1195859	1196059	+	0.167961	0.047249956	mutated ERG motif
chr10:124060802_G_A	chr10	124060702	124060902	+	-0.176841	0.017116788	mutated ERG motif
chr10:127644546_C_A	chr10	127644446	127644646	+	-0.132408	0.017504843	mutated ERG motif
chr10:14053244_T_C	chr10	14053144	14053344	+	0.118899	0.002198095	mutated ERG motif
chr10:14102985_T_G	chr10	14102885	14103085	+	-0.151231	0.046311253	mutated ERG motif
chr10:16784810_C_T	chr10	16784710	16784910	+	-0.192982	0.011064997	mutated ERG motif
chr10:29845316_A_G	chr10	29845216	29845416	+	0.322259	1.25E-07	mutated ERG motif
chr10:32401162_C_T	chr10	32401062	32401262	+	-0.151015	0.03254183	mutated ERG motif
chr10:33568935_G_T	chr10	33568835	33569035	+	0.136838	0.00192278	mutated ERG motif
chr10:3373163_G_C	chr10	3373063	3373263	+	0.298458	4.51E-05	mutated ERG motif
chr10:4909869_G_A	chr10	4909769	4909969	+	0.073075	0.02388475	mutated ERG motif
chr10:50760434_A_G	chr10	50760334	50760534	+	0.116843	0.020523278	mutated ERG motif
chr10:51559469_C_T	chr10	51559369	51559569	+	0.169583	0.000275552	mutated ERG motif
chr10:60022675_G_A	chr10	60022575	60022775	+	0.194854	0.008608137	mutated ERG motif
chr10:71169826_T_C	chr10	71169726	71169926	+	-0.221674	0.00131668	mutated ERG motif
chr10:80863475_C_T	chr10	80863375	80863575	+	0.213503	0.002621513	mutated ERG motif
chr10:85092613_G_C	chr10	85092513	85092713	+	-0.321895	2.47E-05	mutated ERG motif
chr10:90551836_G_C	chr10	90551736	90551936	+	0.349811	6.69E-07	mutated ERG motif
chr10:91847234_A_G	chr10	91847134	91847334	+	-0.345257	0.001069096	mutated ERG motif
chr11:104005673_G_C	chr11	104005573	104005773	+	-0.166915	0.038524983	mutated ERG motif
chr11:112082493_A_G	chr11	112082393	112082593	+	0.20054	0.00588058	mutated ERG motif
chr11:116625897_T_C	chr11	116625797	116625997	+	0.263669	0.000951807	mutated ERG motif
chr11:118100411_G_C	chr11	118100311	118100511	+	0.110498	0.020936539	mutated ERG motif
chr11:124706431_T_A	chr11	124706331	124706531	+	0.183285	0.006730809	mutated ERG motif
chr11:128528593_G_A	chr11	128528493	128528693	+	0.283022	0.00102212	mutated ERG motif
chr11:1674226_G_T	chr11	1674126	1674326	+	0.185732	0.049974407	mutated ERG motif
chr11:27313945_C_T	chr11	27313845	27314045	+	-0.166836	0.031832115	mutated ERG motif
chr11:28070980_G_C	chr11	28070880	28071080	+	-0.134975	0.049061158	mutated ERG motif
chr11:45260645_A_G	chr11	45260545	45260745	+	0.162455	0.016308318	mutated ERG motif
chr11:6115661_A_G	chr11	6115561	6115761	+	-0.13322	0.006858594	mutated ERG motif
chr11:68289796_A_G	chr11	68289696	68289896	+	-0.218491	0.001087893	mutated ERG motif
chr11:68642974_C_T	chr11	68642874	68643074	+	-0.24166	0.000179247	mutated ERG motif
chr11:80691448_T_G	chr11	80691348	80691548	+	0.255856	0.000276803	mutated ERG motif
chr11:85774862_T_C	chr11	85774762	85774962	+	0.125449	0.022917484	mutated ERG motif
chr11:94829514_G_T	chr11	94829414	94829614	+	0.217884	0.000243302	mutated ERG motif
chr11:96026842_C_T	chr11	96026742	96026942	+	-0.157775	0.036702972	mutated ERG motif
chr12:106361242_T_C	chr12	106361142	106361342	+	0.195241	0.008628546	mutated ERG motif
chr12:116930812_ACATGAGTCAGCAGAAGTCATCAGTCAGTAGAAAC_A	chr12	116930712	116930912	+	-0.178202	0.035684839	mutated ERG motif
chr12:120051269_A_G	chr12	120051169	120051369	+	-0.284955	8.32E-05	mutated ERG motif
chr12:120678381_A_G	chr12	120678281	120678481	+	0.142447	0.008264276	mutated ERG motif
chr12:123178817_G_A	chr12	123178717	123178917	+	0.332581	2.22E-05	mutated ERG motif
chr12:129282180_T_C	chr12	129282080	129282280	+	-0.259586	0.000454015	mutated ERG motif
chr12:19211642_T_C	chr12	19211542	19211742	+	0.129561	0.029079492	mutated ERG motif
chr12:20527920_C_T	chr12	20527820	20528020	+	-0.18884	0.000575325	mutated ERG motif
chr12:25941730_T_C	chr12	25941630	25941830	+	0.137743	0.001802455	mutated ERG motif
chr12:26123345_A_G	chr12	26123245	26123445	+	0.105523	0.044141384	mutated ERG motif
chr12:26801236_T_C	chr12	26801136	26801336	+	0.125991	0.045231012	mutated ERG motif
chr12:65204500_C_T	chr12	65204400	65204600	+	-0.210563	5.37E-05	mutated ERG motif
chr12:67828640_C_T	chr12	67828540	67828740	+	0.148091	0.03977007	mutated ERG motif
chr12:6928905_A_G	chr12	6928805	6929005	+	0.156082	0.017146263	mutated ERG motif
chr12:71465403_C_T	chr12	71465303	71465503	+	-0.154158	0.040138323	mutated ERG motif
chr12:71531663_A_T	chr12	71531563	71531763	+	0.143983	0.033980764	mutated ERG motif
chr12:8709569_C_G	chr12	8709469	8709669	+	-0.284485	1.84E-07	mutated ERG motif
chr12:96809924_A_G	chr12	96809824	96810024	+	0.133966	0.033938035	mutated ERG motif
chr12:97641448_A_G	chr12	97641348	97641548	+	0.298564	0.006177187	mutated ERG motif
chr13:101910617_G_A	chr13	101910517	101910717	+	-0.127914	0.031512577	mutated ERG motif
chr13:108012563_A_C	chr13	108012463	108012663	+	-0.159112	0.034618481	mutated ERG motif
chr13:30808908_A_G	chr13	30808808	30809008	+	0.177201	0.013547258	mutated ERG motif
chr13:50113450_G_A	chr13	50113350	50113550	+	-0.104178	0.045992449	mutated ERG motif
chr14:20938251_A_C	chr14	20938151	20938351	+	-0.094062	0.03914128	mutated ERG motif
chr14:22736832_G_A	chr14	22736732	22736932	+	0.248147	0.000725771	mutated ERG motif
chr14:23291924_C_T	chr14	23291824	23292024	+	-0.133687	0.017775148	mutated ERG motif
chr14:25859333_G_A	chr14	25859233	25859433	+	-0.19963	0.001701568	mutated ERG motif
chr14:28846999_A_G	chr14	28846899	28847099	+	0.284528	0.010396314	mutated ERG motif
chr14:29702590_T_G	chr14	29702490	29702690	+	-0.146521	0.010308664	mutated ERG motif
chr14:35839236_G_C	chr14	35839136	35839336	+	-0.102342	0.044639174	mutated ERG motif
chr14:42074524_A_G	chr14	42074424	42074624	+	0.179212	0.033394465	mutated ERG motif
chr14:56224580_C_G	chr14	56224480	56224680	+	0.231736	0.041537864	mutated ERG motif
chr14:63685669_T_C	chr14	63685569	63685769	+	-0.215002	0.003268832	mutated ERG motif
chr14:66087178_A_G	chr14	66087078	66087278	+	0.20366	0.000605813	mutated ERG motif
chr14:72058764_CTGGCAGGAACAGA_C	chr14	72058664	72058864	+	-0.153871	0.019570713	mutated ERG motif
chr14:91251968_G_T	chr14	91251868	91252068	+	-0.161793	0.031272387	mutated ERG motif
chr15:33536932_T_C	chr15	33536832	33537032	+	0.328467	0.000166507	mutated ERG motif
chr15:38026063_T_C	chr15	38025963	38026163	+	0.17815	0.027179819	mutated ERG motif
chr15:38135446_G_C	chr15	38135346	38135546	+	0.224641	0.000910399	mutated ERG motif
chr15:38361447_C_T	chr15	38361347	38361547	+	-0.172424	0.009766555	mutated ERG motif
chr15:42210023_C_A	chr15	42209923	42210123	+	-0.152816	0.037456511	mutated ERG motif
chr15:58501481_G_T	chr15	58501381	58501581	+	0.223438	0.001514114	mutated ERG motif
chr15:58506421_C_T	chr15	58506321	58506521	+	-0.217828	0.001581047	mutated ERG motif
chr15:58636985_T_C	chr15	58636885	58637085	+	-0.18147	0.029680288	mutated ERG motif
chr15:58762377_G_C	chr15	58762277	58762477	+	0.16116	0.001768086	mutated ERG motif
chr15:61132652_A_G	chr15	61132552	61132752	+	0.202416	0.002175457	mutated ERG motif
chr15:80936081_G_A	chr15	80935981	80936181	+	0.142293	0.014060692	mutated ERG motif
chr15:83722059_A_G	chr15	83721959	83722159	+	0.216739	0.008053294	mutated ERG motif
chr15:90717755_C_G	chr15	90717655	90717855	+	0.158067	0.020290927	mutated ERG motif
chr15:90717800_C_G	chr15	90717700	90717900	+	0.164413	0.020290927	mutated ERG motif
chr16:12968865_GA_G	chr16	12968765	12968965	+	-0.212886	0.001302926	mutated ERG motif
chr16:16123522_T_A	chr16	16123422	16123622	+	-0.10491	0.045707381	mutated ERG motif
chr16:59363073_T_C	chr16	59362973	59363173	+	0.23488	0.009320761	mutated ERG motif
chr16:65103292_C_A	chr16	65103192	65103392	+	0.162249	0.003851098	mutated ERG motif
chr16:74794498_C_CA	chr16	74794398	74794598	+	-0.177809	0.001045992	mutated ERG motif
chr16:80233070_A_T	chr16	80232970	80233170	+	0.190099	0.003832716	mutated ERG motif
chr16:83209352_C_A	chr16	83209252	83209452	+	0.15702	0.008947783	mutated ERG motif
chr16:88528125_C_T	chr16	88528025	88528225	+	-0.153616	0.046511872	mutated ERG motif
chr17:11812760_G_A	chr17	11812660	11812860	+	0.139945	0.04854365	mutated ERG motif
chr17:15818291_T_C	chr17	15818191	15818391	+	0.265387	0.002247705	mutated ERG motif
chr17:1917314_G_C	chr17	1917214	1917414	+	0.202303	0.023280103	mutated ERG motif
chr17:39254557_C_T	chr17	39254457	39254657	+	-0.209532	0.002743456	mutated ERG motif
chr17:39621040_G_A	chr17	39620940	39621140	+	-0.090317	0.041640906	mutated ERG motif
chr17:39805118_G_A	chr17	39805018	39805218	+	0.171967	0.003566961	mutated ERG motif
chr17:40781561_G_T	chr17	40781461	40781661	+	0.14717	0.028200601	mutated ERG motif
chr17:44253364_G_A	chr17	44253264	44253464	+	0.167375	0.010101721	mutated ERG motif
chr17:44364538_G_C	chr17	44364438	44364638	+	0.16029	0.025210013	mutated ERG motif
chr17:50170_A_G	chr17	50070	50270	+	0.139582	0.020728658	mutated ERG motif
chr17:64271989_A_C	chr17	64271889	64272089	+	-0.098219	0.00222282	mutated ERG motif
chr17:65713369_C_T	chr17	65713269	65713469	+	-0.15479	0.035990766	mutated ERG motif
chr18:12255703_G_A	chr18	12255603	12255803	+	0.145919	0.020628631	mutated ERG motif
chr18:3153559_A_C	chr18	3153459	3153659	+	0.14406	0.004384517	mutated ERG motif
chr18:37233393_C_T	chr18	37233293	37233493	+	-0.221323	0.000240311	mutated ERG motif
chr18:47460128_C_T	chr18	47460028	47460228	+	-0.240309	0.007796857	mutated ERG motif
chr18:51915281_A_C	chr18	51915181	51915381	+	-0.135691	0.022272531	mutated ERG motif
chr18:54001901_G_A	chr18	54001801	54002001	+	0.180012	0.018961102	mutated ERG motif
chr18:59732274_G_A	chr18	59732174	59732374	+	-0.171909	0.032100039	mutated ERG motif
chr18:7415260_T_C	chr18	7415160	7415360	+	0.212277	0.014659095	mutated ERG motif
chr18:9413736_AC_A	chr18	9413636	9413836	+	-0.169167	0.031847891	mutated ERG motif
chr19:17218970_C_A	chr19	17218870	17219070	+	0.100068	0.013415566	mutated ERG motif
chr19:18146068_C_T	chr19	18145968	18146168	+	-0.138924	0.033106374	mutated ERG motif
chr19:35800662_G_T	chr19	35800562	35800762	+	-0.286673	0.004277602	mutated ERG motif
chr19:46792652_A_G	chr19	46792552	46792752	+	0.120067	0.017830234	mutated ERG motif
chr19:46854055_C_T	chr19	46853955	46854155	+	-0.145932	0.017808404	mutated ERG motif
chr1:100065413_C_T	chr1	100065313	100065513	+	-0.191214	0.018012787	mutated ERG motif
chr1:12046089_G_A	chr1	12045989	12046189	+	-0.215168	0.000822028	mutated ERG motif
chr1:169160348_C_A	chr1	169160248	169160448	+	0.189638	0.00794256	mutated ERG motif
chr1:169160349_C_A	chr1	169160249	169160449	+	0.189638	0.00794256	mutated ERG motif
chr1:17308158_C_T	chr1	17308058	17308258	+	-0.308059	1.97E-07	mutated ERG motif
chr1:179684808_C_A	chr1	179684708	179684908	+	0.108691	0.016977051	mutated ERG motif
chr1:186456336_A_G	chr1	186456236	186456436	+	-0.22951	0.002508184	mutated ERG motif
chr1:193033060_A_G	chr1	193032960	193033160	+	0.147288	0.044549719	mutated ERG motif
chr1:19372604_C_G	chr1	19372504	19372704	+	-0.186984	0.006655181	mutated ERG motif
chr1:199274467_T_C	chr1	199274367	199274567	+	0.293194	2.51E-05	mutated ERG motif
chr1:203746746_G_A	chr1	203746646	203746846	+	0.156885	0.006229631	mutated ERG motif
chr1:208348211_C_A	chr1	208348111	208348311	+	0.098841	0.019613836	mutated ERG motif
chr1:211685489_C_T	chr1	211685389	211685589	+	-0.20225	0.006174619	mutated ERG motif
chr1:212765991_C_G	chr1	212765891	212766091	+	0.166527	0.021058476	mutated ERG motif
chr1:221047603_G_A	chr1	221047503	221047703	+	-0.213491	0.000831244	mutated ERG motif
chr1:223930996_C_T	chr1	223930896	223931096	+	0.114036	0.001621385	mutated ERG motif
chr1:244052058_C_T	chr1	244051958	244052158	+	0.119099	0.028168383	mutated ERG motif
chr1:40845981_T_C	chr1	40845881	40846081	+	0.139506	0.048911666	mutated ERG motif
chr1:41778757_G_A	chr1	41778657	41778857	+	0.130354	0.042019078	mutated ERG motif
chr1:44515696_G_A	chr1	44515596	44515796	+	-0.137868	0.013390045	mutated ERG motif
chr1:55742210_A_G	chr1	55742110	55742310	+	0.25627	0.000478534	mutated ERG motif
chr1:56914815_C_T	chr1	56914715	56914915	+	-0.062174	0.001852658	mutated ERG motif
chr1:59306031_A_G	chr1	59305931	59306131	+	0.225702	5.73E-06	mutated ERG motif
chr1:65428280_C_T	chr1	65428180	65428380	+	-0.240974	6.00E-06	mutated ERG motif
chr1:66039858_T_G	chr1	66039758	66039958	+	-0.217256	0.004194117	mutated ERG motif
chr1:66956685_G_A	chr1	66956585	66956785	+	0.291939	6.88E-08	mutated ERG motif
chr1:67198642_C_T	chr1	67198542	67198742	+	-0.083574	0.03024207	mutated ERG motif
chr1:70038818_C_T	chr1	70038718	70038918	+	-0.240613	0.000408144	mutated ERG motif
chr1:84867148_G_T	chr1	84867048	84867248	+	-0.263254	0.000328776	mutated ERG motif
chr1:86916824_G_A	chr1	86916724	86916924	+	-0.266587	2.82E-06	mutated ERG motif
chr1:8712743_T_G	chr1	8712643	8712843	+	-0.190022	0.012046384	mutated ERG motif
chr1:92166931_C_T	chr1	92166831	92167031	+	-0.207946	0.008670674	mutated ERG motif
chr20:1504882_ACATC_A	chr20	1504782	1504982	+	-0.179541	0.048845177	mutated ERG motif
chr20:19794642_G_A	chr20	19794542	19794742	+	-0.223378	0.000102996	mutated ERG motif
chr20:3597171_A_G	chr20	3597071	3597271	+	-0.269798	0.001834411	mutated ERG motif
chr20:36430407_G_A	chr20	36430307	36430507	+	-0.124713	0.044295635	mutated ERG motif
chr20:7638973_ACAAT_A	chr20	7638873	7639073	+	0.275621	0.000965441	mutated ERG motif
chr21:35936674_A_G	chr21	35936574	35936774	+	0.311854	5.30E-05	mutated ERG motif
chr21:35936693_C_A	chr21	35936593	35936793	+	0.311882	5.30E-05	mutated ERG motif
chr21:40247833_A_C	chr21	40247733	40247933	+	-0.17147	0.02102819	mutated ERG motif
chr21:40342888_C_T	chr21	40342788	40342988	+	0.124225	0.02994352	mutated ERG motif
chr21:45376739_A_G	chr21	45376639	45376839	+	0.175446	0.038638147	mutated ERG motif
chr22:23619440_C_G	chr22	23619340	23619540	+	0.193586	0.00796076	mutated ERG motif
chr22:26142061_C_T	chr22	26141961	26142161	+	-0.139174	0.042838891	mutated ERG motif
chr22:26790999_G_T	chr22	26790899	26791099	+	0.169099	0.004097035	mutated ERG motif
chr22:27903116_G_T	chr22	27903016	27903216	+	-0.115826	0.023313337	mutated ERG motif
chr22:33959638_T_G	chr22	33959538	33959738	+	-0.243513	0.00017812	mutated ERG motif
chr22:37970808_G_A	chr22	37970708	37970908	+	-0.380694	5.16E-11	mutated ERG motif
chr2:111918560_T_C	chr2	111918460	111918660	+	0.161714	0.013281139	mutated ERG motif
chr2:118881367_G_A	chr2	118881267	118881467	+	-0.243809	0.00019901	mutated ERG motif
chr2:141287284_A_G	chr2	141287184	141287384	+	-0.143865	0.033600034	mutated ERG motif
chr2:150045014_G_A	chr2	150044914	150045114	+	-0.29926	3.66E-05	mutated ERG motif
chr2:153272666_G_T	chr2	153272566	153272766	+	-0.170898	0.008178832	mutated ERG motif
chr2:153683596_A_C	chr2	153683496	153683696	+	0.218753	2.86E-05	mutated ERG motif
chr2:161914280_T_G	chr2	161914180	161914380	+	0.141089	0.046547527	mutated ERG motif
chr2:166914465_C_T	chr2	166914365	166914565	+	-0.173983	0.005491318	mutated ERG motif
chr2:187398614_T_C	chr2	187398514	187398714	+	0.118496	0.030535969	mutated ERG motif
chr2:187692983_T_C	chr2	187692883	187693083	+	-0.196466	0.001889382	mutated ERG motif
chr2:201480109_A_G	chr2	201480009	201480209	+	0.086332	0.037473749	mutated ERG motif
chr2:202143928_T_C	chr2	202143828	202144028	+	-0.150974	0.049722063	mutated ERG motif
chr2:205536304_C_T	chr2	205536204	205536404	+	-0.197264	0.001301669	mutated ERG motif
chr2:206006277_T_C	chr2	206006177	206006377	+	0.240987	0.001640326	mutated ERG motif
chr2:207662871_G_A	chr2	207662771	207662971	+	-0.137798	0.034063669	mutated ERG motif
chr2:219433888_C_A	chr2	219433788	219433988	+	0.095779	0.01864629	mutated ERG motif
chr2:220311039_C_A	chr2	220310939	220311139	+	-0.207014	0.001361192	mutated ERG motif
chr2:228440935_T_TC	chr2	228440835	228441035	+	-0.203726	0.000893662	mutated ERG motif
chr2:235782637_G_A	chr2	235782537	235782737	+	-0.247846	0.00123237	mutated ERG motif
chr2:238166147_G_A	chr2	238166047	238166247	+	-0.205223	0.003344092	mutated ERG motif
chr2:37470756_C_T	chr2	37470656	37470856	+	-0.129579	0.029497368	mutated ERG motif
chr2:37828263_G_C	chr2	37828163	37828363	+	0.1932	0.003646907	mutated ERG motif
chr2:37870508_C_G	chr2	37870408	37870608	+	0.218814	0.000631086	mutated ERG motif
chr2:38306415_C_G	chr2	38306315	38306515	+	0.268116	0.000452763	mutated ERG motif
chr2:43862058_G_T	chr2	43861958	43862158	+	0.158237	0.009215007	mutated ERG motif
chr2:46054195_A_G	chr2	46054095	46054295	+	0.276418	2.08E-05	mutated ERG motif
chr2:54805587_C_T	chr2	54805487	54805687	+	-0.171413	0.007337865	mutated ERG motif
chr2:72446753_A_G	chr2	72446653	72446853	+	-0.172885	0.043853885	mutated ERG motif
chr2:80717078_A_G	chr2	80716978	80717178	+	-0.194212	0.010041839	mutated ERG motif
chr2:85972406_T_C	chr2	85972306	85972506	+	-0.161895	0.021964637	mutated ERG motif
chr3:133020705_C_A	chr3	133020605	133020805	+	-0.169387	0.003015521	mutated ERG motif
chr3:14517115_T_C	chr3	14517015	14517215	+	0.195369	0.031009159	mutated ERG motif
chr3:152400590_T_TC	chr3	152400490	152400690	+	-0.178191	0.033017622	mutated ERG motif
chr3:168822959_T_A	chr3	168822859	168823059	+	0.12022	0.004082766	mutated ERG motif
chr3:170469336_A_G	chr3	170469236	170469436	+	-0.151661	4.00E-05	mutated ERG motif
chr3:172280778_G_GAGAC	chr3	172280678	172280878	+	0.10285	0.002758142	mutated ERG motif
chr3:17397336_T_C	chr3	17397236	17397436	+	0.247186	0.000824373	mutated ERG motif
chr3:191173593_C_A	chr3	191173493	191173693	+	-0.202777	0.012601236	mutated ERG motif
chr3:197144582_A_G	chr3	197144482	197144682	+	0.144559	0.04643654	mutated ERG motif
chr3:197215230_T_C	chr3	197215130	197215330	+	0.100326	0.036935221	mutated ERG motif
chr3:22821480_T_G	chr3	22821380	22821580	+	-0.362046	8.52E-06	mutated ERG motif
chr3:30197461_C_T	chr3	30197361	30197561	+	-0.245317	1.94E-07	mutated ERG motif
chr3:37187398_C_T	chr3	37187298	37187498	+	-0.298187	1.22E-05	mutated ERG motif
chr3:37332897_C_T	chr3	37332797	37332997	+	-0.124	0.034862088	mutated ERG motif
chr3:46065763_G_A	chr3	46065663	46065863	+	-0.160201	0.0288956	mutated ERG motif
chr3:52927228_T_C	chr3	52927128	52927328	+	0.219105	0.006332376	mutated ERG motif
chr3:62005888_G_A	chr3	62005788	62005988	+	0.148663	0.000451075	mutated ERG motif
chr3:64943412_G_C	chr3	64943312	64943512	+	0.145454	0.027724662	mutated ERG motif
chr3:66310451_C_T	chr3	66310351	66310551	+	-0.250486	8.82E-07	mutated ERG motif
chr3:72397284_C_A	chr3	72397184	72397384	+	-0.28301	0.000125278	mutated ERG motif
chr3:72952400_A_G	chr3	72952300	72952500	+	-0.306784	4.85E-05	mutated ERG motif
chr3:87399504_A_G	chr3	87399404	87399604	+	0.209741	0.010252071	mutated ERG motif
chr3:98290649_T_A	chr3	98290549	98290749	+	-0.204145	0.024909707	mutated ERG motif
chr4:102251782_C_T	chr4	102251682	102251882	+	-0.167902	0.029636451	mutated ERG motif
chr4:104246093_G_C	chr4	104245993	104246193	+	0.165052	0.039603649	mutated ERG motif
chr4:109921432_G_A	chr4	109921332	109921532	+	-0.163162	0.039312015	mutated ERG motif
chr4:110106049_C_T	chr4	110105949	110106149	+	0.196118	1.66E-06	mutated ERG motif
chr4:113194675_G_A	chr4	113194575	113194775	+	-0.17238	0.000389503	mutated ERG motif
chr4:11477822_A_G	chr4	11477722	11477922	+	-0.161159	0.015620628	mutated ERG motif
chr4:11531354_C_G	chr4	11531254	11531454	+	0.164174	0.005462302	mutated ERG motif
chr4:120206572_A_G	chr4	120206472	120206672	+	0.137849	0.045622843	mutated ERG motif
chr4:12055771_T_C	chr4	12055671	12055871	+	0.134445	0.012485768	mutated ERG motif
chr4:15029803_C_T	chr4	15029703	15029903	+	-0.20884	0.002819043	mutated ERG motif
chr4:169307428_T_C	chr4	169307328	169307528	+	0.33963	5.12E-07	mutated ERG motif
chr4:177804916_C_T	chr4	177804816	177805016	+	0.235118	8.46E-10	mutated ERG motif
chr4:21781816_AG_A	chr4	21781716	21781916	+	0.246672	0.004875788	mutated ERG motif
chr4:37655390_A_T	chr4	37655290	37655490	+	0.117871	0.020157175	mutated ERG motif
chr4:39021910_C_T	chr4	39021810	39022010	+	-0.278867	3.68E-06	mutated ERG motif
chr4:40978765_A_G	chr4	40978665	40978865	+	0.158203	0.001383866	mutated ERG motif
chr4:4258887_C_T	chr4	4258787	4258987	+	-0.215909	0.001161762	mutated ERG motif
chr4:54917367_A_C	chr4	54917267	54917467	+	-0.166625	0.018359644	mutated ERG motif
chr4:71119883_T_A	chr4	71119783	71119983	+	0.238111	0.006091802	mutated ERG motif
chr4:74777594_T_C	chr4	74777494	74777694	+	0.199253	0.003719298	mutated ERG motif
chr4:77725472_G_A	chr4	77725372	77725572	+	-0.239567	0.001196997	mutated ERG motif
chr4:79439806_T_C	chr4	79439706	79439906	+	-0.119086	0.026119007	mutated ERG motif
chr4:83901562_G_A	chr4	83901462	83901662	+	-0.146585	0.018682107	mutated ERG motif
chr4:96432154_T_C	chr4	96432054	96432254	+	0.180064	0.019928605	mutated ERG motif
chr5:125684672_G_A	chr5	125684572	125684772	+	-0.197603	0.001829042	mutated ERG motif
chr5:133089667_A_G	chr5	133089567	133089767	+	0.161625	2.99E-07	mutated ERG motif
chr5:138517235_A_G	chr5	138517135	138517335	+	0.31287	9.51E-06	mutated ERG motif
chr5:143075183_C_T	chr5	143075083	143075283	+	0.171972	0.009920493	mutated ERG motif
chr5:14476968_G_T	chr5	14476868	14477068	+	-0.170678	0.01814039	mutated ERG motif
chr5:147560454_T_C	chr5	147560354	147560554	+	-0.149228	0.040531323	mutated ERG motif
chr5:1559341_T_C	chr5	1559241	1559441	+	0.35145	2.30E-06	mutated ERG motif
chr5:19910261_A_G	chr5	19910161	19910361	+	-0.247769	0.000270922	mutated ERG motif
chr5:33808956_A_G	chr5	33808856	33809056	+	0.199325	0.003154586	mutated ERG motif
chr5:43009529_A_G	chr5	43009429	43009629	+	-0.150013	0.001174803	mutated ERG motif
chr5:5288761_G_A	chr5	5288661	5288861	+	-0.190827	0.011447795	mutated ERG motif
chr5:62558371_G_A	chr5	62558271	62558471	+	-0.103638	0.012923224	mutated ERG motif
chr5:64089910_T_C	chr5	64089810	64090010	+	0.170097	0.000490057	mutated ERG motif
chr5:81717062_T_C	chr5	81716962	81717162	+	0.235036	2.05E-09	mutated ERG motif
chr5:9046892_T_C	chr5	9046792	9046992	+	-0.222382	0.002313269	mutated ERG motif
chr5:94081947_C_A	chr5	94081847	94082047	+	-0.20871	1.08E-06	mutated ERG motif
chr6:100737353_A_C	chr6	100737253	100737453	+	0.233053	0.000998902	mutated ERG motif
chr6:106487938_C_T	chr6	106487838	106488038	+	0.245364	0.010343268	mutated ERG motif
chr6:134768272_C_T	chr6	134768172	134768372	+	-0.17882	0.02561501	mutated ERG motif
chr6:155775606_G_T	chr6	155775506	155775706	+	0.180933	0.039548337	mutated ERG motif
chr6:168389145_T_C	chr6	168389045	168389245	+	0.232391	0.014083788	mutated ERG motif
chr6:18407401_G_A	chr6	18407301	18407501	+	-0.132025	0.01388885	mutated ERG motif
chr6:20623605_T_C	chr6	20623505	20623705	+	0.151804	0.018884877	mutated ERG motif
chr6:23350714_T_C	chr6	23350614	23350814	+	0.181289	0.002896536	mutated ERG motif
chr6:33592211_G_A	chr6	33592111	33592311	+	-0.165575	0.03637261	mutated ERG motif
chr6:38781461_T_C	chr6	38781361	38781561	+	-0.19802	0.000670662	mutated ERG motif
chr6:44692995_G_C	chr6	44692895	44693095	+	0.109606	0.019586924	mutated ERG motif
chr6:54156793_G_GCTTC	chr6	54156693	54156893	+	-0.092868	0.031816986	mutated ERG motif
chr6:6552994_G_A	chr6	6552894	6553094	+	-0.175441	0.030886769	mutated ERG motif
chr6:85759202_A_T	chr6	85759102	85759302	+	-0.28235	3.26E-05	mutated ERG motif
chr6:85787942_G_A	chr6	85787842	85788042	+	0.168586	0.000374894	mutated ERG motif
chr6:86092487_G_A	chr6	86092387	86092587	+	0.304619	0.000379008	mutated ERG motif
chr6:88583388_T_C	chr6	88583288	88583488	+	0.237522	0.00140719	mutated ERG motif
chr7:105314326_A_T	chr7	105314226	105314426	+	0.154863	0.017380992	mutated ERG motif
chr7:121491672_G_A	chr7	121491572	121491772	+	-0.174353	0.022832977	mutated ERG motif
chr7:133992315_C_A	chr7	133992215	133992415	+	-0.367321	1.91E-07	mutated ERG motif
chr7:155005209_A_G	chr7	155005109	155005309	+	0.18124	0.000367012	mutated ERG motif
chr7:22143478_G_A	chr7	22143378	22143578	+	-0.142727	0.01304451	mutated ERG motif
chr7:22154454_G_A	chr7	22154354	22154554	+	-0.203331	0.004185903	mutated ERG motif
chr7:22740513_C_G	chr7	22740413	22740613	+	-0.277677	3.63E-06	mutated ERG motif
chr7:24917974_G_A	chr7	24917874	24918074	+	0.18962	0.033989498	mutated ERG motif
chr7:25965759_G_A	chr7	25965659	25965859	+	0.27737	8.40E-05	mutated ERG motif
chr7:38397930_A_G	chr7	38397830	38398030	+	-0.188895	0.010984104	mutated ERG motif
chr7:46410076_C_T	chr7	46409976	46410176	+	-0.163076	0.010090194	mutated ERG motif
chr7:82760225_C_T	chr7	82760125	82760325	+	-0.196435	0.001735504	mutated ERG motif
chr7:92668332_A_T	chr7	92668232	92668432	+	-0.221713	0.000544133	mutated ERG motif
chr8:103698389_G_A	chr8	103698289	103698489	+	-0.166903	0.03788772	mutated ERG motif
chr8:104462130_A_G	chr8	104462030	104462230	+	0.222491	0.007969175	mutated ERG motif
chr8:107663180_C_T	chr8	107663080	107663280	+	-0.209788	0.004864564	mutated ERG motif
chr8:11584425_C_T	chr8	11584325	11584525	+	-0.173977	0.030446424	mutated ERG motif
chr8:125702485_A_G	chr8	125702385	125702585	+	0.170742	0.022511203	mutated ERG motif
chr8:13230164_C_T	chr8	13230064	13230264	+	-0.280439	3.48E-06	mutated ERG motif
chr8:17466313_T_C	chr8	17466213	17466413	+	0.306958	5.87E-10	mutated ERG motif
chr8:17468580_G_C	chr8	17468480	17468680	+	0.335244	2.42E-15	mutated ERG motif
chr8:20285702_T_C	chr8	20285602	20285802	+	-0.263733	0.0005083	mutated ERG motif
chr8:25228018_G_GT	chr8	25227918	25228118	+	-0.152823	0.047775696	mutated ERG motif
chr8:25228022_T_C	chr8	25227922	25228122	+	0.153219	0.047775696	mutated ERG motif
chr8:31143872_T_G	chr8	31143772	31143972	+	0.312109	2.15E-07	mutated ERG motif
chr8:39081908_T_C	chr8	39081808	39082008	+	-0.161599	0.001893026	mutated ERG motif
chr8:6386286_A_G	chr8	6386186	6386386	+	0.132954	0.023836399	mutated ERG motif
chr8:6726116_C_G	chr8	6726016	6726216	+	-0.171614	0.046739322	mutated ERG motif
chr8:67393613_T_C	chr8	67393513	67393713	+	-0.150145	0.025782348	mutated ERG motif
chr8:73349526_T_G	chr8	73349426	73349626	+	0.233187	0.000791548	mutated ERG motif
chr8:82172791_T_C	chr8	82172691	82172891	+	0.189545	0.039391222	mutated ERG motif
chr8:91592347_GTGAAGGAGTTATTATTTCCTGAAATTGTCT_G	chr8	91592247	91592447	+	-0.19988	0.004311856	mutated ERG motif
chr8:91754462_C_T	chr8	91754362	91754562	+	-0.179392	0.023413577	mutated ERG motif
chr8:96194737_T_G	chr8	96194637	96194837	+	-0.164241	0.042871586	mutated ERG motif
chr8:98859605_G_A	chr8	98859505	98859705	+	-0.228548	0.002748762	mutated ERG motif
chr9:117126626_C_T	chr9	117126526	117126726	+	0.17152	0.02591327	mutated ERG motif
chr9:117665187_G_A	chr9	117665087	117665287	+	-0.136467	0.032759362	mutated ERG motif
chr9:124331465_G_A	chr9	124331365	124331565	+	-0.204378	0.000256909	mutated ERG motif
chr9:124736081_G_A	chr9	124735981	124736181	+	-0.246179	2.49E-05	mutated ERG motif
chr9:124909554_AG_A	chr9	124909454	124909654	+	-0.147929	0.045279801	mutated ERG motif
chr9:125938798_C_T	chr9	125938698	125938898	+	-0.144879	0.016725187	mutated ERG motif
chr9:130308457_T_A	chr9	130308357	130308557	+	0.134184	0.039454617	mutated ERG motif
chr9:130325264_C_T	chr9	130325164	130325364	+	-0.118538	0.047281481	mutated ERG motif
chr9:131762380_T_C	chr9	131762280	131762480	+	0.206581	0.011603842	mutated ERG motif
chr9:13708161_G_A	chr9	13708061	13708261	+	0.106686	0.043974631	mutated ERG motif
chr9:18466457_C_T	chr9	18466357	18466557	+	-0.151501	0.009424957	mutated ERG motif
chr9:27155031_T_C	chr9	27154931	27155131	+	-0.109384	0.02746486	mutated ERG motif
chr9:31314340_T_C	chr9	31314240	31314440	+	0.16538	0.00910969	mutated ERG motif
chr9:36154678_A_C	chr9	36154578	36154778	+	-0.225117	0.000777193	mutated ERG motif
chr9:5394133_C_G	chr9	5394033	5394233	+	0.120965	0.027191512	mutated ERG motif
chr9:71745841_G_A	chr9	71745741	71745941	+	0.10671	0.01997701	mutated ERG motif
chr9:90184648_T_A	chr9	90184548	90184748	+	0.08116	0.001755175	mutated ERG motif
chr9:97951810_C_CA	chr9	97951710	97951910	+	0.075845	0.035744152	mutated ERG motif
chr10:101666401_G_A	chr10	101666301	101666501	+	0.17782	0.017679924	mutated MAGGIE motif
chr10:101666475_T_C	chr10	101666375	101666575	+	0.176445	0.017679924	mutated MAGGIE motif
chr10:101736918_A_G	chr10	101736818	101737018	+	0.129019	0.008326375	mutated MAGGIE motif
chr10:101804425_A_G	chr10	101804325	101804525	+	-0.125856	0.036527781	mutated MAGGIE motif
chr10:102314777_T_C	chr10	102314677	102314877	+	-0.168688	0.016883706	mutated MAGGIE motif
chr10:103734040_A_G	chr10	103733940	103734140	+	0.226823	0.00092656	mutated MAGGIE motif
chr10:104060529_C_T	chr10	104060429	104060629	+	0.097785	0.007557019	mutated MAGGIE motif
chr10:104062494_A_G	chr10	104062394	104062594	+	0.230129	6.70E-05	mutated MAGGIE motif
chr10:104400133_C_T	chr10	104400033	104400233	+	-0.20055	0.00833537	mutated MAGGIE motif
chr10:111659454_A_T	chr10	111659354	111659554	+	0.082081	0.047633369	mutated MAGGIE motif
chr10:112180476_G_C	chr10	112180376	112180576	+	-0.110731	0.004207135	mutated MAGGIE motif
chr10:112357472_A_G	chr10	112357372	112357572	+	-0.154745	0.000307921	mutated MAGGIE motif
chr10:114149305_T_C	chr10	114149205	114149405	+	0.103401	0.004107506	mutated MAGGIE motif
chr10:114149479_C_A	chr10	114149379	114149579	+	0.090095	0.013628051	mutated MAGGIE motif
chr10:114843949_G_A	chr10	114843849	114844049	+	0.260759	0.000400848	mutated MAGGIE motif
chr10:115298026_G_T	chr10	115297926	115298126	+	-0.14835	0.032933224	mutated MAGGIE motif
chr10:116294474_G_A	chr10	116294374	116294574	+	0.189058	9.94E-05	mutated MAGGIE motif
chr10:119069842_A_C	chr10	119069742	119069942	+	-0.177413	0.002268784	mutated MAGGIE motif
chr10:119069856_T_C	chr10	119069756	119069956	+	-0.226923	8.72E-05	mutated MAGGIE motif
chr10:119069956_G_T	chr10	119069856	119070056	+	0.225019	0.00030153	mutated MAGGIE motif
chr10:119129895_T_C	chr10	119129795	119129995	+	0.188597	0.010709294	mutated MAGGIE motif
chr10:120373441_C_T	chr10	120373341	120373541	+	-0.159808	0.043320415	mutated MAGGIE motif
chr10:121288501_G_A	chr10	121288401	121288601	+	0.186289	0.004253018	mutated MAGGIE motif
chr10:121378968_CT_C	chr10	121378868	121379068	+	0.172443	0.033848512	mutated MAGGIE motif
chr10:121700255_C_T	chr10	121700155	121700355	+	0.150703	0.002304519	mutated MAGGIE motif
chr10:122189070_G_A	chr10	122188970	122189170	+	0.210688	0.007851634	mutated MAGGIE motif
chr10:122515394_T_C	chr10	122515294	122515494	+	-0.135582	0.02855979	mutated MAGGIE motif
chr10:122678080_C_T	chr10	122677980	122678180	+	0.164881	0.043805711	mutated MAGGIE motif
chr10:12307827_C_T	chr10	12307727	12307927	+	-0.193341	0.000455639	mutated MAGGIE motif
chr10:12307894_C_T	chr10	12307794	12307994	+	0.172644	0.000455639	mutated MAGGIE motif
chr10:125757093_C_T	chr10	125756993	125757193	+	0.169954	0.041749304	mutated MAGGIE motif
chr10:125757105_G_A	chr10	125757005	125757205	+	0.170306	0.041749304	mutated MAGGIE motif
chr10:126411924_G_A	chr10	126411824	126412024	+	-0.127015	0.049947009	mutated MAGGIE motif
chr10:12877925_A_G	chr10	12877825	12878025	+	-0.212598	0.000864951	mutated MAGGIE motif
chr10:12878020_C_A	chr10	12877920	12878120	+	-0.186612	0.001692721	mutated MAGGIE motif
chr10:12878043_G_A	chr10	12877943	12878143	+	-0.187387	0.001692721	mutated MAGGIE motif
chr10:130019626_C_T	chr10	130019526	130019726	+	0.254952	0.001049193	mutated MAGGIE motif
chr10:131509805_C_G	chr10	131509705	131509905	+	-0.271602	0.000182723	mutated MAGGIE motif
chr10:134406839_G_A	chr10	134406739	134406939	+	-0.197339	0.002707184	mutated MAGGIE motif
chr10:134406992_T_C	chr10	134406892	134407092	+	-0.20957	0.002707184	mutated MAGGIE motif
chr10:134776744_A_G	chr10	134776644	134776844	+	-0.129892	0.040570655	mutated MAGGIE motif
chr10:13961288_G_A	chr10	13961188	13961388	+	-0.291419	0.001362379	mutated MAGGIE motif
chr10:14029546_A_G	chr10	14029446	14029646	+	-0.176414	0.021422462	mutated MAGGIE motif
chr10:14029682_G_A	chr10	14029582	14029782	+	0.190978	1.40E-06	mutated MAGGIE motif
chr10:14029701_G_A	chr10	14029601	14029801	+	0.190984	1.40E-06	mutated MAGGIE motif
chr10:14029742_T_C	chr10	14029642	14029842	+	0.190997	1.40E-06	mutated MAGGIE motif
chr10:14053253_G_T	chr10	14053153	14053353	+	0.11861	0.002198095	mutated MAGGIE motif
chr10:14116573_C_T	chr10	14116473	14116673	+	-0.101716	0.047706177	mutated MAGGIE motif
chr10:14542605_C_T	chr10	14542505	14542705	+	0.143011	0.043790432	mutated MAGGIE motif
chr10:14587885_C_T	chr10	14587785	14587985	+	0.160752	0.013144581	mutated MAGGIE motif
chr10:14602443_C_T	chr10	14602343	14602543	+	0.074165	0.030301187	mutated MAGGIE motif
chr10:15222970_G_T	chr10	15222870	15223070	+	0.146708	0.031838029	mutated MAGGIE motif
chr10:15239498_A_G	chr10	15239398	15239598	+	-0.120021	0.002634838	mutated MAGGIE motif
chr10:16933460_G_T	chr10	16933360	16933560	+	0.198235	0.011846334	mutated MAGGIE motif
chr10:17045317_A_T	chr10	17045217	17045417	+	-0.213947	0.004769254	mutated MAGGIE motif
chr10:17250200_GATCATGA_G	chr10	17250100	17250300	+	-0.222856	0.002562107	mutated MAGGIE motif
chr10:18947446_T_A	chr10	18947346	18947546	+	0.181479	0.019629348	mutated MAGGIE motif
chr10:22233793_A_T	chr10	22233693	22233893	+	-0.202379	0.000996496	mutated MAGGIE motif
chr10:22341421_G_A	chr10	22341321	22341521	+	0.14534	0.046814425	mutated MAGGIE motif
chr10:22341574_C_G	chr10	22341474	22341674	+	0.16123	0.046814425	mutated MAGGIE motif
chr10:24496662_C_T	chr10	24496562	24496762	+	-0.125176	0.017642919	mutated MAGGIE motif
chr10:24582491_GC_G	chr10	24582391	24582591	+	-0.16625	0.009182439	mutated MAGGIE motif
chr10:24582586_T_C	chr10	24582486	24582686	+	-0.157159	0.040238245	mutated MAGGIE motif
chr10:24638639_G_A	chr10	24638539	24638739	+	-0.236447	0.000224473	mutated MAGGIE motif
chr10:24638656_T_C	chr10	24638556	24638756	+	-0.202627	0.00124782	mutated MAGGIE motif
chr10:24663615_T_C	chr10	24663515	24663715	+	0.299953	6.74E-05	mutated MAGGIE motif
chr10:24663639_A_G	chr10	24663539	24663739	+	0.299968	6.74E-05	mutated MAGGIE motif
chr10:24663642_C_T	chr10	24663542	24663742	+	0.299968	6.74E-05	mutated MAGGIE motif
chr10:24663722_G_A	chr10	24663622	24663822	+	0.299909	6.74E-05	mutated MAGGIE motif
chr10:24753146_T_C	chr10	24753046	24753246	+	-0.162736	0.022043284	mutated MAGGIE motif
chr10:25853521_C_T	chr10	25853421	25853621	+	-0.21426	0.006850404	mutated MAGGIE motif
chr10:25853581_G_C	chr10	25853481	25853681	+	-0.214336	0.006850404	mutated MAGGIE motif
chr10:27672782_A_G	chr10	27672682	27672882	+	-0.177997	0.001228772	mutated MAGGIE motif
chr10:27673128_C_T	chr10	27673028	27673228	+	0.147621	0.006271158	mutated MAGGIE motif
chr10:29871949_G_A	chr10	29871849	29872049	+	0.277663	6.79E-06	mutated MAGGIE motif
chr10:30003223_T_G	chr10	30003123	30003323	+	-0.167943	0.007928094	mutated MAGGIE motif
chr10:30236431_T_C	chr10	30236331	30236531	+	0.275453	1.27E-08	mutated MAGGIE motif
chr10:30236521_C_A	chr10	30236421	30236621	+	0.275576	1.57E-08	mutated MAGGIE motif
chr10:31025929_C_T	chr10	31025829	31026029	+	0.23587	8.22E-05	mutated MAGGIE motif
chr10:3133648_T_G	chr10	3133548	3133748	+	-0.095699	0.016852705	mutated MAGGIE motif
chr10:3133714_C_T	chr10	3133614	3133814	+	-0.111973	0.016852705	mutated MAGGIE motif
chr10:3179079_AAAGATTAGCAAAATATTTTTATAGGGATCACTG_A	chr10	3178979	3179179	+	-0.207812	0.004349377	mutated MAGGIE motif
chr10:3179189_A_G	chr10	3179089	3179289	+	-0.223944	0.004349377	mutated MAGGIE motif
chr10:3179703_C_T	chr10	3179603	3179803	+	-0.234294	0.001046817	mutated MAGGIE motif
chr10:3179708_A_G	chr10	3179608	3179808	+	-0.233422	0.001046817	mutated MAGGIE motif
chr10:3183747_A_G	chr10	3183647	3183847	+	-0.232929	0.000327723	mutated MAGGIE motif
chr10:32401298_A_G	chr10	32401198	32401398	+	-0.150525	0.03254183	mutated MAGGIE motif
chr10:33165422_G_A	chr10	33165322	33165522	+	0.297682	0.000178719	mutated MAGGIE motif
chr10:3381890_C_T	chr10	3381790	3381990	+	0.130516	0.034976091	mutated MAGGIE motif
chr10:3381912_T_C	chr10	3381812	3382012	+	0.130562	0.034976091	mutated MAGGIE motif
chr10:3382156_A_G	chr10	3382056	3382256	+	0.130521	0.034976091	mutated MAGGIE motif
chr10:34622507_C_T	chr10	34622407	34622607	+	-0.170085	0.001100896	mutated MAGGIE motif
chr10:34622639_A_G	chr10	34622539	34622739	+	-0.220552	0.000109248	mutated MAGGIE motif
chr10:34627091_A_C	chr10	34626991	34627191	+	0.155846	0.00343408	mutated MAGGIE motif
chr10:34627212_C_T	chr10	34627112	34627312	+	0.155128	0.00343408	mutated MAGGIE motif
chr10:35514327_C_T	chr10	35514227	35514427	+	-0.190835	0.001455879	mutated MAGGIE motif
chr10:3559024_C_T	chr10	3558924	3559124	+	0.229035	0.012781037	mutated MAGGIE motif
chr10:36067367_T_C	chr10	36067267	36067467	+	-0.167671	0.028318799	mutated MAGGIE motif
chr10:36067407_T_G	chr10	36067307	36067507	+	-0.230558	0.004744271	mutated MAGGIE motif
chr10:36742014_C_G	chr10	36741914	36742114	+	-0.240423	1.44E-05	mutated MAGGIE motif
chr10:36910374_G_A	chr10	36910274	36910474	+	-0.152297	0.036027126	mutated MAGGIE motif
chr10:3805609_G_A	chr10	3805509	3805709	+	0.106821	0.046788481	mutated MAGGIE motif
chr10:3971739_G_T	chr10	3971639	3971839	+	0.146989	0.0138237	mutated MAGGIE motif
chr10:3971879_C_T	chr10	3971779	3971979	+	0.146551	0.0138237	mutated MAGGIE motif
chr10:3971991_G_A	chr10	3971891	3972091	+	0.146562	0.0138237	mutated MAGGIE motif
chr10:3972077_T_C	chr10	3971977	3972177	+	0.146423	0.0138237	mutated MAGGIE motif
chr10:3972090_G_A	chr10	3971990	3972190	+	0.146407	0.0138237	mutated MAGGIE motif
chr10:4163983_G_A	chr10	4163883	4164083	+	0.19572	0.010980799	mutated MAGGIE motif
chr10:4163987_G_A	chr10	4163887	4164087	+	0.182428	0.010980799	mutated MAGGIE motif
chr10:43801393_A_C	chr10	43801293	43801493	+	-0.101659	0.012716078	mutated MAGGIE motif
chr10:44357854_T_C	chr10	44357754	44357954	+	-0.157348	0.009992095	mutated MAGGIE motif
chr10:44565194_T_G	chr10	44565094	44565294	+	0.220984	0.014825049	mutated MAGGIE motif
chr10:45064764_C_T	chr10	45064664	45064864	+	-0.139867	0.001816953	mutated MAGGIE motif
chr10:45064837_C_G	chr10	45064737	45064937	+	-0.139869	0.001816953	mutated MAGGIE motif
chr10:45064840_A_G	chr10	45064740	45064940	+	-0.13945	0.001816953	mutated MAGGIE motif
chr10:45064931_C_T	chr10	45064831	45065031	+	-0.139418	0.001816953	mutated MAGGIE motif
chr10:45248484_T_C	chr10	45248384	45248584	+	-0.117654	0.005836387	mutated MAGGIE motif
chr10:45297529_C_T	chr10	45297429	45297629	+	-0.171834	0.001509003	mutated MAGGIE motif
chr10:45920705_C_T	chr10	45920605	45920805	+	0.218268	0.002612516	mutated MAGGIE motif
chr10:4900320_T_C	chr10	4900220	4900420	+	0.235471	0.000520755	mutated MAGGIE motif
chr10:4909968_T_C	chr10	4909868	4910068	+	-0.139005	3.90E-06	mutated MAGGIE motif
chr10:4910028_C_A	chr10	4909928	4910128	+	0.082524	0.020382279	mutated MAGGIE motif
chr10:4944816_C_T	chr10	4944716	4944916	+	-0.204982	0.004618848	mutated MAGGIE motif
chr10:49739555_A_G	chr10	49739455	49739655	+	-0.227362	0.022726003	mutated MAGGIE motif
chr10:50021541_G_A	chr10	50021441	50021641	+	0.241018	0.000693232	mutated MAGGIE motif
chr10:5075724_T_A	chr10	5075624	5075824	+	-0.307185	1.62E-06	mutated MAGGIE motif
chr10:5075827_G_T	chr10	5075727	5075927	+	0.193188	0.016138157	mutated MAGGIE motif
chr10:52086760_C_CAAACTAGAACACAT	chr10	52086660	52086860	+	-0.114468	0.020194616	mutated MAGGIE motif
chr10:52086939_C_G	chr10	52086839	52087039	+	-0.116427	0.020194616	mutated MAGGIE motif
chr10:52153787_T_C	chr10	52153687	52153887	+	-0.121007	0.019907251	mutated MAGGIE motif
chr10:52296835_T_C	chr10	52296735	52296935	+	-0.107325	0.009201605	mutated MAGGIE motif
chr10:52364614_GAAATAT_G	chr10	52364514	52364714	+	-0.261938	5.55E-06	mutated MAGGIE motif
chr10:52364756_G_A	chr10	52364656	52364856	+	-0.262776	5.55E-06	mutated MAGGIE motif
chr10:53479087_G_C	chr10	53478987	53479187	+	0.120111	0.027203056	mutated MAGGIE motif
chr10:53678819_C_T	chr10	53678719	53678919	+	0.191094	9.03E-05	mutated MAGGIE motif
chr10:53790461_C_T	chr10	53790361	53790561	+	0.203379	7.55E-05	mutated MAGGIE motif
chr10:54285661_C_T	chr10	54285561	54285761	+	-0.184815	0.020723331	mutated MAGGIE motif
chr10:55123356_G_C	chr10	55123256	55123456	+	0.192675	0.024920329	mutated MAGGIE motif
chr10:55123373_G_T	chr10	55123273	55123473	+	0.222838	0.008579801	mutated MAGGIE motif
chr10:5544093_T_C	chr10	5543993	5544193	+	-0.227226	1.21E-05	mutated MAGGIE motif
chr10:5544190_G_A	chr10	5544090	5544290	+	0.202599	1.21E-05	mutated MAGGIE motif
chr10:56452411_C_T	chr10	56452311	56452511	+	0.18233	0.048460219	mutated MAGGIE motif
chr10:56794155_C_T	chr10	56794055	56794255	+	0.243065	0.012546636	mutated MAGGIE motif
chr10:60014595_A_G	chr10	60014495	60014695	+	0.174867	0.000951183	mutated MAGGIE motif
chr10:60014646_G_A	chr10	60014546	60014746	+	0.175146	0.000951183	mutated MAGGIE motif
chr10:60159362_T_G	chr10	60159262	60159462	+	-0.096745	0.02005976	mutated MAGGIE motif
chr10:60314275_G_A	chr10	60314175	60314375	+	0.222215	0.002501155	mutated MAGGIE motif
chr10:6178344_T_C	chr10	6178244	6178444	+	0.132321	0.004674337	mutated MAGGIE motif
chr10:6178388_C_T	chr10	6178288	6178488	+	0.132348	0.004674337	mutated MAGGIE motif
chr10:6178614_C_T	chr10	6178514	6178714	+	0.122652	0.010233268	mutated MAGGIE motif
chr10:62020728_G_C	chr10	62020628	62020828	+	0.173732	0.043537969	mutated MAGGIE motif
chr10:62042734_A_G	chr10	62042634	62042834	+	-0.096415	0.02574021	mutated MAGGIE motif
chr10:62074280_T_C	chr10	62074180	62074380	+	-0.145551	0.000950023	mutated MAGGIE motif
chr10:62734063_A_T	chr10	62733963	62734163	+	-0.13911	0.022618541	mutated MAGGIE motif
chr10:62749393_T_C	chr10	62749293	62749493	+	-0.176139	0.003412083	mutated MAGGIE motif
chr10:62788795_C_T	chr10	62788695	62788895	+	0.172969	0.01764705	mutated MAGGIE motif
chr10:63220824_A_G	chr10	63220724	63220924	+	0.160492	0.009235537	mutated MAGGIE motif
chr10:63564248_G_A	chr10	63564148	63564348	+	-0.138352	0.024833206	mutated MAGGIE motif
chr10:63633467_G_A	chr10	63633367	63633567	+	0.144894	0.031371281	mutated MAGGIE motif
chr10:64203860_C_G	chr10	64203760	64203960	+	0.092114	0.015553325	mutated MAGGIE motif
chr10:64235506_G_A	chr10	64235406	64235606	+	0.217434	0.00213585	mutated MAGGIE motif
chr10:64970448_G_A	chr10	64970348	64970548	+	-0.164074	0.002980254	mutated MAGGIE motif
chr10:65108156_G_C	chr10	65108056	65108256	+	-0.181908	0.018423861	mutated MAGGIE motif
chr10:69962850_G_A	chr10	69962750	69962950	+	-0.126193	0.047144735	mutated MAGGIE motif
chr10:70805373_C_T	chr10	70805273	70805473	+	0.170554	0.012318519	mutated MAGGIE motif
chr10:71169915_C_G	chr10	71169815	71170015	+	-0.219097	0.00131668	mutated MAGGIE motif
chr10:71579681_G_A	chr10	71579581	71579781	+	0.092824	0.047995941	mutated MAGGIE motif
chr10:73591829_G_A	chr10	73591729	73591929	+	-0.099631	0.042488928	mutated MAGGIE motif
chr10:73605926_G_T	chr10	73605826	73606026	+	-0.179901	0.001227991	mutated MAGGIE motif
chr10:73745476_C_T	chr10	73745376	73745576	+	-0.091631	0.046946027	mutated MAGGIE motif
chr10:73745599_C_T	chr10	73745499	73745699	+	-0.12072	0.030158456	mutated MAGGIE motif
chr10:74606261_C_T	chr10	74606161	74606361	+	-0.134056	0.002545935	mutated MAGGIE motif
chr10:75894404_C_T	chr10	75894304	75894504	+	0.231074	0.000239817	mutated MAGGIE motif
chr10:79338844_G_C	chr10	79338744	79338944	+	0.172266	0.003422579	mutated MAGGIE motif
chr10:79605096_A_C	chr10	79604996	79605196	+	0.151653	0.0346528	mutated MAGGIE motif
chr10:79948428_T_C	chr10	79948328	79948528	+	-0.154875	0.048978865	mutated MAGGIE motif
chr10:80218096_C_A	chr10	80217996	80218196	+	-0.183398	0.009572462	mutated MAGGIE motif
chr10:80932807_A_G	chr10	80932707	80932907	+	0.200462	0.025206991	mutated MAGGIE motif
chr10:82222178_C_A	chr10	82222078	82222278	+	0.099676	0.037235117	mutated MAGGIE motif
chr10:82381181_T_G	chr10	82381081	82381281	+	0.143297	0.047464475	mutated MAGGIE motif
chr10:85368250_G_A	chr10	85368150	85368350	+	0.169264	0.001571522	mutated MAGGIE motif
chr10:90039355_A_AACAC	chr10	90039255	90039455	+	0.267894	0.000172023	mutated MAGGIE motif
chr10:90528499_C_T	chr10	90528399	90528599	+	0.176582	0.035051362	mutated MAGGIE motif
chr10:90600140_G_A	chr10	90600040	90600240	+	-0.115183	0.029397966	mutated MAGGIE motif
chr10:90845055_T_C	chr10	90844955	90845155	+	-0.177098	0.000126637	mutated MAGGIE motif
chr10:90849019_G_T	chr10	90848919	90849119	+	-0.105194	0.048919812	mutated MAGGIE motif
chr10:90889829_C_G	chr10	90889729	90889929	+	-0.226449	0.001305049	mutated MAGGIE motif
chr10:91847296_A_G	chr10	91847196	91847396	+	-0.179473	0.036032576	mutated MAGGIE motif
chr10:91847297_A_G	chr10	91847197	91847397	+	-0.179491	0.036032576	mutated MAGGIE motif
chr10:91959021_G_A	chr10	91958921	91959121	+	0.30173	4.83E-07	mutated MAGGIE motif
chr10:91959144_T_C	chr10	91959044	91959244	+	0.279277	3.58E-06	mutated MAGGIE motif
chr10:92150441_T_C	chr10	92150341	92150541	+	0.202839	0.011190205	mutated MAGGIE motif
chr10:92177113_C_A	chr10	92177013	92177213	+	-0.13622	0.011063183	mutated MAGGIE motif
chr10:92347112_A_G	chr10	92347012	92347212	+	-0.172008	0.033853054	mutated MAGGIE motif
chr10:93300646_T_A	chr10	93300546	93300746	+	0.178354	0.012530145	mutated MAGGIE motif
chr10:93763337_A_T	chr10	93763237	93763437	+	0.165789	0.043627786	mutated MAGGIE motif
chr10:94572035_A_G	chr10	94571935	94572135	+	0.218423	7.11E-05	mutated MAGGIE motif
chr10:95163883_G_A	chr10	95163783	95163983	+	0.232524	4.23E-05	mutated MAGGIE motif
chr10:95178044_A_G	chr10	95177944	95178144	+	-0.192564	0.012795765	mutated MAGGIE motif
chr10:95205947_G_A	chr10	95205847	95206047	+	-0.178353	0.009830143	mutated MAGGIE motif
chr10:95205950_G_T	chr10	95205850	95206050	+	0.296059	5.47E-07	mutated MAGGIE motif
chr10:9676613_T_C	chr10	9676513	9676713	+	-0.17473	0.008399626	mutated MAGGIE motif
chr10:9676638_T_C	chr10	9676538	9676738	+	-0.174669	0.008399626	mutated MAGGIE motif
chr10:97108383_T_C	chr10	97108283	97108483	+	-0.128436	0.04836513	mutated MAGGIE motif
chr10:97108394_C_T	chr10	97108294	97108494	+	-0.146959	0.04836513	mutated MAGGIE motif
chr10:9999468_A_T	chr10	9999368	9999568	+	0.295651	0.00010557	mutated MAGGIE motif
chr11:100646936_C_T	chr11	100646836	100647036	+	-0.330297	2.80E-06	mutated MAGGIE motif
chr11:100646982_A_G	chr11	100646882	100647082	+	0.230276	0.002634379	mutated MAGGIE motif
chr11:100835255_T_G	chr11	100835155	100835355	+	0.222522	0.007440564	mutated MAGGIE motif
chr11:102483998_G_A	chr11	102483898	102484098	+	0.208527	0.001251487	mutated MAGGIE motif
chr11:102491990_A_G	chr11	102491890	102492090	+	-0.150794	0.013469487	mutated MAGGIE motif
chr11:102670495_TC_T	chr11	102670395	102670595	+	-0.195989	6.06E-05	mutated MAGGIE motif
chr11:103462488_T_C	chr11	103462388	103462588	+	0.182417	0.001395974	mutated MAGGIE motif
chr11:103505127_A_T	chr11	103505027	103505227	+	0.255484	3.97E-07	mutated MAGGIE motif
chr11:103505169_C_T	chr11	103505069	103505269	+	-0.263201	3.97E-07	mutated MAGGIE motif
chr11:103528885_A_G	chr11	103528785	103528985	+	-0.175294	0.016965056	mutated MAGGIE motif
chr11:103668962_A_T	chr11	103668862	103669062	+	-0.205336	0.000114986	mutated MAGGIE motif
chr11:104005565_C_A	chr11	104005465	104005665	+	-0.166228	0.038524983	mutated MAGGIE motif
chr11:10422641_G_T	chr11	10422541	10422741	+	0.171876	0.006631337	mutated MAGGIE motif
chr11:104405081_C_A	chr11	104404981	104405181	+	0.16338	0.007683122	mutated MAGGIE motif
chr11:10476689_A_G	chr11	10476589	10476789	+	-0.225959	0.001090087	mutated MAGGIE motif
chr11:104918132_T_C	chr11	104918032	104918232	+	-0.312344	9.61E-07	mutated MAGGIE motif
chr11:1060934_C_A	chr11	1060834	1061034	+	-0.15747	0.023110524	mutated MAGGIE motif
chr11:1061038_C_T	chr11	1060938	1061138	+	-0.219063	0.00116984	mutated MAGGIE motif
chr11:1061057_A_T	chr11	1060957	1061157	+	-0.219123	0.00116984	mutated MAGGIE motif
chr11:107947457_G_A	chr11	107947357	107947557	+	-0.198357	0.014813562	mutated MAGGIE motif
chr11:108741318_A_C	chr11	108741218	108741418	+	0.218123	0.000997341	mutated MAGGIE motif
chr11:108757536_A_T	chr11	108757436	108757636	+	-0.177897	0.016324408	mutated MAGGIE motif
chr11:109785851_A_G	chr11	109785751	109785951	+	0.112844	0.016384865	mutated MAGGIE motif
chr11:110126197_A_G	chr11	110126097	110126297	+	-0.134623	0.029971763	mutated MAGGIE motif
chr11:110182694_A_C	chr11	110182594	110182794	+	-0.167113	0.003300561	mutated MAGGIE motif
chr11:110244228_C_G	chr11	110244128	110244328	+	-0.179064	0.000809726	mutated MAGGIE motif
chr11:110244360_A_T	chr11	110244260	110244460	+	-0.179078	0.000809726	mutated MAGGIE motif
chr11:11371716_C_T	chr11	11371616	11371816	+	0.204325	0.00229233	mutated MAGGIE motif
chr11:114268331_A_T	chr11	114268231	114268431	+	0.164959	0.030892419	mutated MAGGIE motif
chr11:115093323_ATAGTACTGAAACTGG_A	chr11	115093223	115093423	+	0.219053	0.003875412	mutated MAGGIE motif
chr11:115093438_G_C	chr11	115093338	115093538	+	0.219134	0.003875412	mutated MAGGIE motif
chr11:115524038_C_G	chr11	115523938	115524138	+	0.18299	0.032594996	mutated MAGGIE motif
chr11:117208747_T_C	chr11	117208647	117208847	+	-0.184922	0.021927605	mutated MAGGIE motif
chr11:118928033_T_TG	chr11	118927933	118928133	+	0.137689	0.048681577	mutated MAGGIE motif
chr11:118955509_T_A	chr11	118955409	118955609	+	0.150696	0.018429556	mutated MAGGIE motif
chr11:118973133_G_A	chr11	118973033	118973233	+	-0.097739	0.031650605	mutated MAGGIE motif
chr11:12009819_A_G	chr11	12009719	12009919	+	0.168713	0.000907424	mutated MAGGIE motif
chr11:12038874_G_A	chr11	12038774	12038974	+	0.108123	7.05E-05	mutated MAGGIE motif
chr11:12087978_G_A	chr11	12087878	12088078	+	0.188553	3.68E-05	mutated MAGGIE motif
chr11:12160041_G_T	chr11	12159941	12160141	+	0.179108	0.003589626	mutated MAGGIE motif
chr11:122067773_G_C	chr11	122067673	122067873	+	0.071905	0.045004407	mutated MAGGIE motif
chr11:12235726_C_T	chr11	12235626	12235826	+	0.205116	0.000430417	mutated MAGGIE motif
chr11:122524951_G_A	chr11	122524851	122525051	+	-0.138642	0.04833139	mutated MAGGIE motif
chr11:122524967_A_G	chr11	122524867	122525067	+	0.176282	0.006533737	mutated MAGGIE motif
chr11:12255277_A_G	chr11	12255177	12255377	+	0.122406	0.008070441	mutated MAGGIE motif
chr11:122603367_G_A	chr11	122603267	122603467	+	0.166425	0.000189504	mutated MAGGIE motif
chr11:12290812_G_A	chr11	12290712	12290912	+	0.3656	1.81E-07	mutated MAGGIE motif
chr11:123275452_G_C	chr11	123275352	123275552	+	0.230755	0.003096447	mutated MAGGIE motif
chr11:123325012_A_C	chr11	123324912	123325112	+	0.193107	0.001480716	mutated MAGGIE motif
chr11:123692923_T_A	chr11	123692823	123693023	+	0.279282	0.001235783	mutated MAGGIE motif
chr11:127490791_C_G	chr11	127490691	127490891	+	-0.163682	0.028819672	mutated MAGGIE motif
chr11:128041582_G_A	chr11	128041482	128041682	+	-0.150841	0.043350828	mutated MAGGIE motif
chr11:128346793_T_C	chr11	128346693	128346893	+	0.164717	0.012741848	mutated MAGGIE motif
chr11:128443644_T_A	chr11	128443544	128443744	+	0.276978	1.39E-05	mutated MAGGIE motif
chr11:128528654_C_G	chr11	128528554	128528754	+	0.282851	0.00102212	mutated MAGGIE motif
chr11:128528718_G_A	chr11	128528618	128528818	+	0.292125	0.00102212	mutated MAGGIE motif
chr11:130116805_C_G	chr11	130116705	130116905	+	0.20245	0.027235808	mutated MAGGIE motif
chr11:130760494_A_T	chr11	130760394	130760594	+	0.107389	0.010504932	mutated MAGGIE motif
chr11:130779621_C_T	chr11	130779521	130779721	+	0.143858	0.000266456	mutated MAGGIE motif
chr11:130779646_A_G	chr11	130779546	130779746	+	0.144127	0.000266456	mutated MAGGIE motif
chr11:130779668_T_C	chr11	130779568	130779768	+	-0.06708	0.037705739	mutated MAGGIE motif
chr11:130779674_C_T	chr11	130779574	130779774	+	0.144187	0.000266456	mutated MAGGIE motif
chr11:13119756_T_A	chr11	13119656	13119856	+	-0.163127	0.028876154	mutated MAGGIE motif
chr11:13120668_C_T	chr11	13120568	13120768	+	0.208832	0.002405724	mutated MAGGIE motif
chr11:131694876_A_C	chr11	131694776	131694976	+	-0.194235	0.030027938	mutated MAGGIE motif
chr11:131898713_T_C	chr11	131898613	131898813	+	0.157209	0.004397681	mutated MAGGIE motif
chr11:131898718_T_A	chr11	131898618	131898818	+	0.157209	0.004397681	mutated MAGGIE motif
chr11:131981976_G_A	chr11	131981876	131982076	+	-0.151631	0.010024992	mutated MAGGIE motif
chr11:133991313_GAGTC_G	chr11	133991213	133991413	+	-0.178275	0.04195216	mutated MAGGIE motif
chr11:15128346_C_A	chr11	15128246	15128446	+	-0.143331	0.045038762	mutated MAGGIE motif
chr11:15216692_C_T	chr11	15216592	15216792	+	0.199157	0.02085907	mutated MAGGIE motif
chr11:15216785_T_C	chr11	15216685	15216885	+	0.194993	0.02085907	mutated MAGGIE motif
chr11:18102232_C_T	chr11	18102132	18102332	+	-0.211227	0.000777839	mutated MAGGIE motif
chr11:19221518_G_A	chr11	19221418	19221618	+	0.118926	0.034857863	mutated MAGGIE motif
chr11:23495465_T_C	chr11	23495365	23495565	+	-0.106859	0.041467738	mutated MAGGIE motif
chr11:23495625_T_C	chr11	23495525	23495725	+	-0.106952	0.041467738	mutated MAGGIE motif
chr11:23495688_C_G	chr11	23495588	23495788	+	-0.107586	0.041467738	mutated MAGGIE motif
chr11:23592527_A_G	chr11	23592427	23592627	+	-0.190094	0.013559572	mutated MAGGIE motif
chr11:23592577_A_T	chr11	23592477	23592677	+	-0.246399	0.004734116	mutated MAGGIE motif
chr11:26252853_T_C	chr11	26252753	26252953	+	-0.084208	0.043497206	mutated MAGGIE motif
chr11:26252993_A_G	chr11	26252893	26253093	+	-0.07771	0.045609509	mutated MAGGIE motif
chr11:26253126_G_T	chr11	26253026	26253226	+	-0.087417	0.043497206	mutated MAGGIE motif
chr11:26253172_C_T	chr11	26253072	26253272	+	-0.085905	0.043497206	mutated MAGGIE motif
chr11:26254987_T_C	chr11	26254887	26255087	+	-0.154615	0.026033546	mutated MAGGIE motif
chr11:26762851_G_A	chr11	26762751	26762951	+	0.206029	0.044223547	mutated MAGGIE motif
chr11:27313952_T_C	chr11	27313852	27314052	+	-0.133701	0.046950921	mutated MAGGIE motif
chr11:28455860_G_A	chr11	28455760	28455960	+	-0.267266	6.18E-06	mutated MAGGIE motif
chr11:3080102_G_A	chr11	3080002	3080202	+	0.209333	0.002608148	mutated MAGGIE motif
chr11:33229296_A_C	chr11	33229196	33229396	+	0.164936	0.012269687	mutated MAGGIE motif
chr11:33399691_G_A	chr11	33399591	33399791	+	-0.164069	0.008463807	mutated MAGGIE motif
chr11:33668284_C_T	chr11	33668184	33668384	+	-0.271236	5.70E-08	mutated MAGGIE motif
chr11:33668341_T_A	chr11	33668241	33668441	+	-0.126554	0.013672734	mutated MAGGIE motif
chr11:33668586_G_A	chr11	33668486	33668686	+	-0.238263	6.10E-06	mutated MAGGIE motif
chr11:35053622_C_A	chr11	35053522	35053722	+	-0.118577	0.030373833	mutated MAGGIE motif
chr11:35053634_G_A	chr11	35053534	35053734	+	-0.151507	0.005385451	mutated MAGGIE motif
chr11:35187406_T_A	chr11	35187306	35187506	+	-0.19787	6.62E-05	mutated MAGGIE motif
chr11:35187568_T_C	chr11	35187468	35187668	+	0.090087	0.034656136	mutated MAGGIE motif
chr11:35620334_G_A	chr11	35620234	35620434	+	0.278161	2.32E-06	mutated MAGGIE motif
chr11:35620458_A_G	chr11	35620358	35620558	+	0.251119	6.90E-05	mutated MAGGIE motif
chr11:35829478_G_A	chr11	35829378	35829578	+	0.169652	0.019837911	mutated MAGGIE motif
chr11:35873934_A_C	chr11	35873834	35874034	+	-0.156255	0.037744474	mutated MAGGIE motif
chr11:36096853_G_GCCTTTTTCCTTGGCCTTTTTAT	chr11	36096753	36096953	+	-0.079211	0.040569601	mutated MAGGIE motif
chr11:36096969_G_C	chr11	36096869	36097069	+	0.079257	0.040569601	mutated MAGGIE motif
chr11:36279097_A_G	chr11	36278997	36279197	+	0.17225	0.018754784	mutated MAGGIE motif
chr11:36279113_C_G	chr11	36279013	36279213	+	0.172312	0.018754784	mutated MAGGIE motif
chr11:3964805_C_A	chr11	3964705	3964905	+	-0.234517	0.002788145	mutated MAGGIE motif
chr11:43890799_G_A	chr11	43890699	43890899	+	-0.148214	0.010493998	mutated MAGGIE motif
chr11:43957825_G_A	chr11	43957725	43957925	+	0.310064	6.81E-05	mutated MAGGIE motif
chr11:43957859_G_A	chr11	43957759	43957959	+	0.283859	0.000108738	mutated MAGGIE motif
chr11:44802602_C_A	chr11	44802502	44802702	+	0.212005	0.001125401	mutated MAGGIE motif
chr11:45690907_G_A	chr11	45690807	45691007	+	0.265382	0.00086697	mutated MAGGIE motif
chr11:47684908_T_C	chr11	47684808	47685008	+	0.130605	0.004713182	mutated MAGGIE motif
chr11:5385545_C_A	chr11	5385445	5385645	+	0.129255	0.019621024	mutated MAGGIE motif
chr11:5388902_G_C	chr11	5388802	5389002	+	0.164505	0.048113147	mutated MAGGIE motif
chr11:57012742_G_A	chr11	57012642	57012842	+	0.249681	0.018524231	mutated MAGGIE motif
chr11:57159189_T_C	chr11	57159089	57159289	+	0.164013	0.04099533	mutated MAGGIE motif
chr11:57792221_G_A	chr11	57792121	57792321	+	-0.186651	7.76E-05	mutated MAGGIE motif
chr11:57792300_G_A	chr11	57792200	57792400	+	0.161307	9.21E-06	mutated MAGGIE motif
chr11:59936926_A_C	chr11	59936826	59937026	+	-0.137716	0.006045334	mutated MAGGIE motif
chr11:59936979_A_G	chr11	59936879	59937079	+	-0.109053	0.029746389	mutated MAGGIE motif
chr11:60603209_A_C	chr11	60603109	60603309	+	0.118041	0.018135266	mutated MAGGIE motif
chr11:6115474_A_G	chr11	6115374	6115574	+	-0.137645	0.006779291	mutated MAGGIE motif
chr11:6115513_C_A	chr11	6115413	6115613	+	-0.137747	0.006779291	mutated MAGGIE motif
chr11:6115519_T_G	chr11	6115419	6115619	+	-0.137756	0.006779291	mutated MAGGIE motif
chr11:61746291_A_C	chr11	61746191	61746391	+	0.132859	0.004252242	mutated MAGGIE motif
chr11:63752979_T_A	chr11	63752879	63753079	+	-0.109367	0.046783408	mutated MAGGIE motif
chr11:65581752_G_C	chr11	65581652	65581852	+	-0.142647	0.021063026	mutated MAGGIE motif
chr11:66493421_C_T	chr11	66493321	66493521	+	0.430102	0.001799071	mutated MAGGIE motif
chr11:67350932_G_T	chr11	67350832	67351032	+	0.175958	0.003225136	mutated MAGGIE motif
chr11:67927928_C_T	chr11	67927828	67928028	+	0.204373	0.009464546	mutated MAGGIE motif
chr11:68182028_G_A	chr11	68181928	68182128	+	0.205146	0.000600603	mutated MAGGIE motif
chr11:68426684_C_T	chr11	68426584	68426784	+	-0.163353	0.032103119	mutated MAGGIE motif
chr11:6871976_A_T	chr11	6871876	6872076	+	-0.182163	0.029660408	mutated MAGGIE motif
chr11:6872054_T_C	chr11	6871954	6872154	+	-0.182459	0.029660408	mutated MAGGIE motif
chr11:68856680_G_A	chr11	68856580	68856780	+	-0.247567	9.58E-05	mutated MAGGIE motif
chr11:68856804_C_G	chr11	68856704	68856904	+	-0.247412	9.58E-05	mutated MAGGIE motif
chr11:68856916_C_T	chr11	68856816	68857016	+	0.217671	8.21E-05	mutated MAGGIE motif
chr11:6933318_C_T	chr11	6933218	6933418	+	0.164756	0.002579748	mutated MAGGIE motif
chr11:69974423_T_C	chr11	69974323	69974523	+	0.162389	0.029979195	mutated MAGGIE motif
chr11:69974480_A_G	chr11	69974380	69974580	+	0.163228	0.029979195	mutated MAGGIE motif
chr11:69974621_G_A	chr11	69974521	69974721	+	0.163375	0.029979195	mutated MAGGIE motif
chr11:7137217_C_T	chr11	7137117	7137317	+	0.264346	0.000208114	mutated MAGGIE motif
chr11:71752160_T_G	chr11	71752060	71752260	+	0.111211	0.027494671	mutated MAGGIE motif
chr11:72195008_T_C	chr11	72194908	72195108	+	0.157406	0.000412397	mutated MAGGIE motif
chr11:72195034_A_G	chr11	72194934	72195134	+	0.13268	0.000406231	mutated MAGGIE motif
chr11:72222550_G_T	chr11	72222450	72222650	+	-0.191721	0.005494209	mutated MAGGIE motif
chr11:7439418_A_G	chr11	7439318	7439518	+	0.211561	0.049518321	mutated MAGGIE motif
chr11:7439447_C_T	chr11	7439347	7439547	+	0.211537	0.049518321	mutated MAGGIE motif
chr11:74481631_T_C	chr11	74481531	74481731	+	-0.118206	0.027170649	mutated MAGGIE motif
chr11:75067912_A_G	chr11	75067812	75068012	+	-0.141579	0.027451627	mutated MAGGIE motif
chr11:75096957_G_A	chr11	75096857	75097057	+	0.12336	0.002885641	mutated MAGGIE motif
chr11:76082342_G_A	chr11	76082242	76082442	+	0.11247	0.048346915	mutated MAGGIE motif
chr11:76980743_T_C	chr11	76980643	76980843	+	-0.166948	0.012716015	mutated MAGGIE motif
chr11:7949350_A_G	chr11	7949250	7949450	+	-0.198233	0.007921083	mutated MAGGIE motif
chr11:83295176_T_C	chr11	83295076	83295276	+	0.156978	0.015041513	mutated MAGGIE motif
chr11:85815030_G_A	chr11	85814930	85815130	+	-0.208218	0.012870686	mutated MAGGIE motif
chr11:86165147_G_T	chr11	86165047	86165247	+	-0.202537	0.010213779	mutated MAGGIE motif
chr11:86332357_C_T	chr11	86332257	86332457	+	-0.17029	0.026521137	mutated MAGGIE motif
chr11:87102538_A_G	chr11	87102438	87102638	+	0.257587	0.00057161	mutated MAGGIE motif
chr11:8714138_C_T	chr11	8714038	8714238	+	0.129103	0.004084138	mutated MAGGIE motif
chr11:8714275_T_C	chr11	8714175	8714375	+	0.129076	0.004084138	mutated MAGGIE motif
chr11:88309263_G_A	chr11	88309163	88309363	+	0.108825	0.036748049	mutated MAGGIE motif
chr11:88312969_C_T	chr11	88312869	88313069	+	0.134672	0.022962066	mutated MAGGIE motif
chr11:89154721_T_C	chr11	89154621	89154821	+	0.150853	0.017685969	mutated MAGGIE motif
chr11:90652629_C_T	chr11	90652529	90652729	+	-0.241682	0.002037629	mutated MAGGIE motif
chr11:91358927_G_A	chr11	91358827	91359027	+	0.341497	1.98E-05	mutated MAGGIE motif
chr11:9241448_G_A	chr11	9241348	9241548	+	-0.134185	0.034520345	mutated MAGGIE motif
chr11:92818428_A_T	chr11	92818328	92818528	+	0.344234	3.19E-06	mutated MAGGIE motif
chr11:93862020_C_T	chr11	93861920	93862120	+	0.080979	0.024848069	mutated MAGGIE motif
chr11:93926656_C_T	chr11	93926556	93926756	+	-0.201119	0.000160232	mutated MAGGIE motif
chr11:94336130_T_C	chr11	94336030	94336230	+	0.102247	0.049952589	mutated MAGGIE motif
chr11:94883601_A_G	chr11	94883501	94883701	+	-0.141441	0.049623593	mutated MAGGIE motif
chr11:95232867_A_G	chr11	95232767	95232967	+	0.192733	0.016365032	mutated MAGGIE motif
chr11:96026835_C_T	chr11	96026735	96026935	+	-0.157777	0.036702972	mutated MAGGIE motif
chr11:97486665_C_T	chr11	97486565	97486765	+	-0.13302	0.022687177	mutated MAGGIE motif
chr11:9884636_AG_A	chr11	9884536	9884736	+	-0.102414	0.022107068	mutated MAGGIE motif
chr12:102568101_A_G	chr12	102568001	102568201	+	-0.132261	0.048901484	mutated MAGGIE motif
chr12:104323238_C_A	chr12	104323138	104323338	+	0.130759	0.007039334	mutated MAGGIE motif
chr12:106460001_G_A	chr12	106459901	106460101	+	-0.202121	0.000749111	mutated MAGGIE motif
chr12:106476402_T_C	chr12	106476302	106476502	+	0.187154	0.014255215	mutated MAGGIE motif
chr12:107450998_A_T	chr12	107450898	107451098	+	0.13199	0.036533965	mutated MAGGIE motif
chr12:107658715_A_G	chr12	107658615	107658815	+	0.184163	0.000698475	mutated MAGGIE motif
chr12:10804912_T_C	chr12	10804812	10805012	+	0.162597	0.000883678	mutated MAGGIE motif
chr12:109896165_T_C	chr12	109896065	109896265	+	-0.126965	0.015432183	mutated MAGGIE motif
chr12:111136459_A_G	chr12	111136359	111136559	+	-0.110456	0.029603596	mutated MAGGIE motif
chr12:111831993_A_G	chr12	111831893	111832093	+	0.374831	5.42E-08	mutated MAGGIE motif
chr12:11326842_C_T	chr12	11326742	11326942	+	0.171755	0.035968084	mutated MAGGIE motif
chr12:114701311_T_C	chr12	114701211	114701411	+	0.215892	0.001099434	mutated MAGGIE motif
chr12:116784611_T_C	chr12	116784511	116784711	+	0.083785	0.046397352	mutated MAGGIE motif
chr12:116930670_C_T	chr12	116930570	116930770	+	-0.224987	0.006326557	mutated MAGGIE motif
chr12:11827629_G_A	chr12	11827529	11827729	+	0.248443	9.21E-06	mutated MAGGIE motif
chr12:120926319_C_G	chr12	120926219	120926419	+	0.110778	0.033805243	mutated MAGGIE motif
chr12:121608556_G_A	chr12	121608456	121608656	+	-0.10019	0.029873066	mutated MAGGIE motif
chr12:124515218_G_A	chr12	124515118	124515318	+	0.123433	0.02619613	mutated MAGGIE motif
chr12:124721371_C_T	chr12	124721271	124721471	+	0.108721	0.041917372	mutated MAGGIE motif
chr12:124721419_T_A	chr12	124721319	124721519	+	0.112402	0.011697872	mutated MAGGIE motif
chr12:125140448_A_AG	chr12	125140348	125140548	+	-0.160042	0.000342063	mutated MAGGIE motif
chr12:125140547_T_C	chr12	125140447	125140647	+	-0.153417	0.003423757	mutated MAGGIE motif
chr12:125166046_A_G	chr12	125165946	125166146	+	-0.120902	0.001301269	mutated MAGGIE motif
chr12:125259562_GGTGA_G	chr12	125259462	125259662	+	-0.17512	0.003749279	mutated MAGGIE motif
chr12:125346033_A_T	chr12	125345933	125346133	+	-0.1144	0.018511327	mutated MAGGIE motif
chr12:125625570_A_G	chr12	125625470	125625670	+	0.149945	0.007212785	mutated MAGGIE motif
chr12:127768639_C_T	chr12	127768539	127768739	+	-0.375433	1.48E-06	mutated MAGGIE motif
chr12:127768657_T_G	chr12	127768557	127768757	+	-0.132688	0.028666822	mutated MAGGIE motif
chr12:128160793_C_T	chr12	128160693	128160893	+	0.290769	6.09E-06	mutated MAGGIE motif
chr12:129286486_C_T	chr12	129286386	129286586	+	0.289107	6.86E-06	mutated MAGGIE motif
chr12:12989658_G_A	chr12	12989558	12989758	+	-0.239943	9.70E-06	mutated MAGGIE motif
chr12:13040944_C_G	chr12	13040844	13041044	+	0.158468	0.00703078	mutated MAGGIE motif
chr12:13075202_A_G	chr12	13075102	13075302	+	-0.14966	0.000653805	mutated MAGGIE motif
chr12:13075379_G_A	chr12	13075279	13075479	+	-0.150152	0.000653805	mutated MAGGIE motif
chr12:15729360_A_C	chr12	15729260	15729460	+	-0.197402	0.002104424	mutated MAGGIE motif
chr12:15949735_C_T	chr12	15949635	15949835	+	0.223677	0.000474009	mutated MAGGIE motif
chr12:15949922_C_T	chr12	15949822	15950022	+	0.242546	0.000168952	mutated MAGGIE motif
chr12:16124948_C_T	chr12	16124848	16125048	+	0.168784	0.028584113	mutated MAGGIE motif
chr12:16124951_G_C	chr12	16124851	16125051	+	0.168848	0.028584113	mutated MAGGIE motif
chr12:20337594_A_G	chr12	20337494	20337694	+	-0.179886	0.004502272	mutated MAGGIE motif
chr12:20337687_G_A	chr12	20337587	20337787	+	0.208573	0.001113899	mutated MAGGIE motif
chr12:20527912_T_C	chr12	20527812	20528012	+	0.194596	5.90E-05	mutated MAGGIE motif
chr12:22435394_T_G	chr12	22435294	22435494	+	-0.146424	0.008651301	mutated MAGGIE motif
chr12:22892059_C_T	chr12	22891959	22892159	+	0.255535	0.001082225	mutated MAGGIE motif
chr12:23882483_G_C	chr12	23882383	23882583	+	0.154785	0.028243947	mutated MAGGIE motif
chr12:25101572_C_G	chr12	25101472	25101672	+	0.181089	0.000774958	mutated MAGGIE motif
chr12:25193775_A_G	chr12	25193675	25193875	+	-0.196063	0.004499015	mutated MAGGIE motif
chr12:25193778_A_C	chr12	25193678	25193878	+	-0.195957	0.004499015	mutated MAGGIE motif
chr12:26123245_G_T	chr12	26123145	26123345	+	-0.13726	0.044141384	mutated MAGGIE motif
chr12:26795422_T_C	chr12	26795322	26795522	+	-0.194515	0.010375104	mutated MAGGIE motif
chr12:26801117_G_GA	chr12	26801017	26801217	+	-0.124854	0.045231012	mutated MAGGIE motif
chr12:2737059_C_G	chr12	2736959	2737159	+	-0.162338	0.034725485	mutated MAGGIE motif
chr12:27427956_A_G	chr12	27427856	27428056	+	-0.090549	0.046994918	mutated MAGGIE motif
chr12:28181174_A_G	chr12	28181074	28181274	+	-0.167245	0.00446761	mutated MAGGIE motif
chr12:28218553_T_C	chr12	28218453	28218653	+	0.092636	0.035046579	mutated MAGGIE motif
chr12:29062345_G_T	chr12	29062245	29062445	+	-0.13961	0.005818804	mutated MAGGIE motif
chr12:29082443_A_G	chr12	29082343	29082543	+	-0.180087	0.005945881	mutated MAGGIE motif
chr12:29082444_T_C	chr12	29082344	29082544	+	0.25101	0.000778786	mutated MAGGIE motif
chr12:29082529_A_G	chr12	29082429	29082629	+	0.248697	0.000778786	mutated MAGGIE motif
chr12:29082563_C_T	chr12	29082463	29082663	+	0.248765	0.000778786	mutated MAGGIE motif
chr12:29082602_A_C	chr12	29082502	29082702	+	0.250895	0.000778786	mutated MAGGIE motif
chr12:29087232_T_C	chr12	29087132	29087332	+	-0.216238	0.000265696	mutated MAGGIE motif
chr12:29087445_T_A	chr12	29087345	29087545	+	-0.212802	0.000265696	mutated MAGGIE motif
chr12:29087463_A_G	chr12	29087363	29087563	+	0.10177	0.004270695	mutated MAGGIE motif
chr12:2986911_G_T	chr12	2986811	2987011	+	0.099721	0.037393443	mutated MAGGIE motif
chr12:3004843_C_A	chr12	3004743	3004943	+	0.142085	0.018588194	mutated MAGGIE motif
chr12:3004844_CTCTT_C	chr12	3004744	3004944	+	0.142085	0.018588194	mutated MAGGIE motif
chr12:3005008_A_G	chr12	3004908	3005108	+	0.142289	0.018588194	mutated MAGGIE motif
chr12:31175230_T_C	chr12	31175130	31175330	+	-0.131908	0.009256513	mutated MAGGIE motif
chr12:31359083_C_T	chr12	31358983	31359183	+	-0.17554	0.004389745	mutated MAGGIE motif
chr12:31359159_C_CAATGGTAA	chr12	31359059	31359259	+	0.104793	0.035796851	mutated MAGGIE motif
chr12:32204698_G_A	chr12	32204598	32204798	+	-0.369218	4.02E-08	mutated MAGGIE motif
chr12:32204749_C_T	chr12	32204649	32204849	+	0.216247	7.55E-05	mutated MAGGIE motif
chr12:3866465_A_G	chr12	3866365	3866565	+	-0.149559	0.044145577	mutated MAGGIE motif
chr12:40616166_G_A	chr12	40616066	40616266	+	0.151211	0.006743378	mutated MAGGIE motif
chr12:41941429_A_T	chr12	41941329	41941529	+	0.151222	0.048629211	mutated MAGGIE motif
chr12:42844398_A_G	chr12	42844298	42844498	+	-0.14357	0.032370592	mutated MAGGIE motif
chr12:46613819_C_T	chr12	46613719	46613919	+	0.212475	1.92E-05	mutated MAGGIE motif
chr12:46877389_A_T	chr12	46877289	46877489	+	0.107204	0.024384959	mutated MAGGIE motif
chr12:46877429_A_G	chr12	46877329	46877529	+	0.106304	0.024384959	mutated MAGGIE motif
chr12:46950111_C_T	chr12	46950011	46950211	+	-0.17929	0.010841923	mutated MAGGIE motif
chr12:47358286_G_A	chr12	47358186	47358386	+	-0.166571	0.031543979	mutated MAGGIE motif
chr12:4757474_G_A	chr12	4757374	4757574	+	-0.195763	0.000594506	mutated MAGGIE motif
chr12:47582695_T_C	chr12	47582595	47582795	+	-0.139497	0.028818619	mutated MAGGIE motif
chr12:47582724_C_T	chr12	47582624	47582824	+	-0.118455	0.028818619	mutated MAGGIE motif
chr12:48275583_TA_T	chr12	48275483	48275683	+	0.105356	0.04770505	mutated MAGGIE motif
chr12:50526814_G_A	chr12	50526714	50526914	+	0.298187	1.06E-06	mutated MAGGIE motif
chr12:51855727_A_G	chr12	51855627	51855827	+	0.289638	0.000301226	mutated MAGGIE motif
chr12:51855774_T_TA	chr12	51855674	51855874	+	0.271589	0.000605051	mutated MAGGIE motif
chr12:51855779_T_A	chr12	51855679	51855879	+	0.197471	0.012238689	mutated MAGGIE motif
chr12:52522078_C_T	chr12	52521978	52522178	+	-0.099823	0.049346542	mutated MAGGIE motif
chr12:52580070_G_T	chr12	52579970	52580170	+	0.117998	0.02655456	mutated MAGGIE motif
chr12:54127378_C_T	chr12	54127278	54127478	+	-0.182972	0.021216307	mutated MAGGIE motif
chr12:54127379_A_G	chr12	54127279	54127479	+	-0.175024	0.021216307	mutated MAGGIE motif
chr12:57766392_G_C	chr12	57766292	57766492	+	0.247196	1.20E-05	mutated MAGGIE motif
chr12:58335330_C_G	chr12	58335230	58335430	+	-0.08534	0.047840289	mutated MAGGIE motif
chr12:5877395_C_A	chr12	5877295	5877495	+	0.141656	0.017399057	mutated MAGGIE motif
chr12:58875763_TGAG_CGAG	chr12	58875663	58875863	+	0.155065	0.039962919	mutated MAGGIE motif
chr12:58894319_AATCTT_A	chr12	58894219	58894419	+	0.10317	0.045213091	mutated MAGGIE motif
chr12:58894408_C_T	chr12	58894308	58894508	+	0.102994	0.045213091	mutated MAGGIE motif
chr12:590449_T_C	chr12	590349	590549	+	-0.191748	0.003231959	mutated MAGGIE motif
chr12:59529924_C_T	chr12	59529824	59530024	+	0.192158	0.000685557	mutated MAGGIE motif
chr12:60542784_A_C	chr12	60542684	60542884	+	0.12265	0.00146057	mutated MAGGIE motif
chr12:6311160_C_T	chr12	6311060	6311260	+	-0.173439	0.001885448	mutated MAGGIE motif
chr12:6396156_T_C	chr12	6396056	6396256	+	0.173947	0.000956191	mutated MAGGIE motif
chr12:6405578_T_C	chr12	6405478	6405678	+	-0.213423	2.02E-05	mutated MAGGIE motif
chr12:66991811_C_CATT	chr12	66991711	66991911	+	0.157968	0.035948045	mutated MAGGIE motif
chr12:6928913_A_G	chr12	6928813	6929013	+	0.156077	0.017146263	mutated MAGGIE motif
chr12:69375536_C_T	chr12	69375436	69375636	+	-0.254611	0.000330313	mutated MAGGIE motif
chr12:69786543_T_G	chr12	69786443	69786643	+	0.193023	0.000393536	mutated MAGGIE motif
chr12:70047753_G_C	chr12	70047653	70047853	+	0.18447	0.006251395	mutated MAGGIE motif
chr12:70295146_C_T	chr12	70295046	70295246	+	-0.115795	0.033494365	mutated MAGGIE motif
chr12:70302108_T_A	chr12	70302008	70302208	+	-0.145908	0.014063374	mutated MAGGIE motif
chr12:70446911_T_G	chr12	70446811	70447011	+	0.107627	0.02565079	mutated MAGGIE motif
chr12:7053085_A_G	chr12	7052985	7053185	+	-0.168586	0.004348754	mutated MAGGIE motif
chr12:70937443_T_C	chr12	70937343	70937543	+	0.094432	0.014566276	mutated MAGGIE motif
chr12:70997102_G_A	chr12	70997002	70997202	+	0.13166	0.008291139	mutated MAGGIE motif
chr12:71465408_G_A	chr12	71465308	71465508	+	-0.154155	0.040138323	mutated MAGGIE motif
chr12:71524473_G_A	chr12	71524373	71524573	+	-0.180742	0.000301607	mutated MAGGIE motif
chr12:71531639_G_A	chr12	71531539	71531739	+	0.142838	0.033980764	mutated MAGGIE motif
chr12:71588586_T_G	chr12	71588486	71588686	+	0.290087	1.11E-06	mutated MAGGIE motif
chr12:71697185_C_A	chr12	71697085	71697285	+	-0.274415	1.00E-04	mutated MAGGIE motif
chr12:75965276_A_T	chr12	75965176	75965376	+	0.161987	0.009020004	mutated MAGGIE motif
chr12:76054670_A_T	chr12	76054570	76054770	+	0.238381	0.001159949	mutated MAGGIE motif
chr12:76186758_G_T	chr12	76186658	76186858	+	0.183667	0.005611865	mutated MAGGIE motif
chr12:76197891_G_T	chr12	76197791	76197991	+	-0.217378	0.006881557	mutated MAGGIE motif
chr12:76228715_G_GT	chr12	76228615	76228815	+	0.186716	0.003215458	mutated MAGGIE motif
chr12:76247492_G_A	chr12	76247392	76247592	+	-0.141748	0.047364171	mutated MAGGIE motif
chr12:76414678_G_T	chr12	76414578	76414778	+	-0.144436	0.005449368	mutated MAGGIE motif
chr12:76617909_T_C	chr12	76617809	76618009	+	-0.15208	0.032185762	mutated MAGGIE motif
chr12:76735377_C_G	chr12	76735277	76735477	+	0.298705	3.61E-06	mutated MAGGIE motif
chr12:77481323_C_G	chr12	77481223	77481423	+	0.20082	2.31E-05	mutated MAGGIE motif
chr12:77481412_C_T	chr12	77481312	77481512	+	0.188303	7.20E-05	mutated MAGGIE motif
chr12:77481430_T_G	chr12	77481330	77481530	+	0.200806	2.31E-05	mutated MAGGIE motif
chr12:77492338_A_T	chr12	77492238	77492438	+	0.305818	8.72E-06	mutated MAGGIE motif
chr12:78221535_A_G	chr12	78221435	78221635	+	0.172668	0.027562201	mutated MAGGIE motif
chr12:78588283_G_A	chr12	78588183	78588383	+	0.196052	2.07E-07	mutated MAGGIE motif
chr12:79196482_T_C	chr12	79196382	79196582	+	0.182477	0.020857279	mutated MAGGIE motif
chr12:79791607_A_T	chr12	79791507	79791707	+	-0.172248	0.016002337	mutated MAGGIE motif
chr12:80836774_T_C	chr12	80836674	80836874	+	-0.158287	0.034217251	mutated MAGGIE motif
chr12:86127322_A_G	chr12	86127222	86127422	+	-0.159396	0.004882949	mutated MAGGIE motif
chr12:8703141_G_T	chr12	8703041	8703241	+	-0.119789	0.016880778	mutated MAGGIE motif
chr12:8703351_T_A	chr12	8703251	8703451	+	-0.119797	0.016880778	mutated MAGGIE motif
chr12:8717898_T_G	chr12	8717798	8717998	+	-0.151979	0.035787858	mutated MAGGIE motif
chr12:89638583_G_A	chr12	89638483	89638683	+	-0.157878	0.027897537	mutated MAGGIE motif
chr12:89871180_A_C	chr12	89871080	89871280	+	0.321345	7.74E-07	mutated MAGGIE motif
chr12:90078622_C_T	chr12	90078522	90078722	+	0.17197	0.028312075	mutated MAGGIE motif
chr12:91304921_T_C	chr12	91304821	91305021	+	0.134709	0.026735767	mutated MAGGIE motif
chr12:92734946_G_C	chr12	92734846	92735046	+	-0.157499	0.004558339	mutated MAGGIE motif
chr12:93474847_G_C	chr12	93474747	93474947	+	-0.138778	0.039924128	mutated MAGGIE motif
chr12:93716736_C_A	chr12	93716636	93716836	+	0.122138	0.016849819	mutated MAGGIE motif
chr12:94947015_A_G	chr12	94946915	94947115	+	-0.158641	0.001908653	mutated MAGGIE motif
chr12:94947140_C_T	chr12	94947040	94947240	+	-0.160041	0.001908653	mutated MAGGIE motif
chr12:94980422_A_T	chr12	94980322	94980522	+	0.213466	0.002121202	mutated MAGGIE motif
chr12:94980601_T_G	chr12	94980501	94980701	+	0.213529	0.002121202	mutated MAGGIE motif
chr12:95070260_A_G	chr12	95070160	95070360	+	-0.107388	0.01565352	mutated MAGGIE motif
chr12:95567830_G_A	chr12	95567730	95567930	+	-0.173654	0.023363273	mutated MAGGIE motif
chr12:95571398_T_C	chr12	95571298	95571498	+	-0.238924	8.69E-05	mutated MAGGIE motif
chr12:95730269_C_A	chr12	95730169	95730369	+	0.124696	0.023410572	mutated MAGGIE motif
chr12:96005979_C_CCTT	chr12	96005879	96006079	+	0.175422	0.000806025	mutated MAGGIE motif
chr12:96006036_T_G	chr12	96005936	96006136	+	0.175404	0.000806025	mutated MAGGIE motif
chr12:96423782_T_C	chr12	96423682	96423882	+	0.356123	2.19E-08	mutated MAGGIE motif
chr12:96861370_G_A	chr12	96861270	96861470	+	0.237541	0.00046902	mutated MAGGIE motif
chr12:96861403_C_T	chr12	96861303	96861503	+	0.208035	0.002078787	mutated MAGGIE motif
chr12:96867639_A_C	chr12	96867539	96867739	+	-0.363299	4.80E-11	mutated MAGGIE motif
chr12:97133246_A_G	chr12	97133146	97133346	+	0.223567	0.002075614	mutated MAGGIE motif
chr12:9820575_T_A	chr12	9820475	9820675	+	-0.259141	7.14E-05	mutated MAGGIE motif
chr12:98763533_C_T	chr12	98763433	98763633	+	-0.149035	0.029972153	mutated MAGGIE motif
chr13:100862494_A_G	chr13	100862394	100862594	+	-0.133068	0.022510261	mutated MAGGIE motif
chr13:101014031_A_G	chr13	101013931	101014131	+	0.261255	2.09E-05	mutated MAGGIE motif
chr13:103291133_TGGAACCAA_T	chr13	103291033	103291233	+	0.198081	0.000222478	mutated MAGGIE motif
chr13:104963360_C_T	chr13	104963260	104963460	+	0.185909	0.019074082	mutated MAGGIE motif
chr13:106577994_T_C	chr13	106577894	106578094	+	0.225966	0.004070142	mutated MAGGIE motif
chr13:107239305_G_A	chr13	107239205	107239405	+	-0.255979	0.000306647	mutated MAGGIE motif
chr13:108014182_C_G	chr13	108014082	108014282	+	0.200669	0.001137313	mutated MAGGIE motif
chr13:108014189_T_G	chr13	108014089	108014289	+	0.20072	0.001137313	mutated MAGGIE motif
chr13:108228908_C_T	chr13	108228808	108229008	+	-0.119974	0.048616295	mutated MAGGIE motif
chr13:111423967_C_A	chr13	111423867	111424067	+	-0.124595	0.026886512	mutated MAGGIE motif
chr13:111594819_T_C	chr13	111594719	111594919	+	-0.14444	0.022629674	mutated MAGGIE motif
chr13:113872712_T_C	chr13	113872612	113872812	+	0.116773	0.007862713	mutated MAGGIE motif
chr13:114600401_A_C	chr13	114600301	114600501	+	0.146979	0.002019027	mutated MAGGIE motif
chr13:114826156_C_A	chr13	114826056	114826256	+	0.212544	0.029243334	mutated MAGGIE motif
chr13:21067080_A_G	chr13	21066980	21067180	+	-0.168235	0.011425579	mutated MAGGIE motif
chr13:23323346_G_A	chr13	23323246	23323446	+	0.308925	0.016849973	mutated MAGGIE motif
chr13:29073854_T_G	chr13	29073754	29073954	+	0.130707	0.040170839	mutated MAGGIE motif
chr13:29224601_C_G	chr13	29224501	29224701	+	0.167017	0.015003339	mutated MAGGIE motif
chr13:29325508_C_T	chr13	29325408	29325608	+	0.205945	0.000870873	mutated MAGGIE motif
chr13:31197683_C_T	chr13	31197583	31197783	+	-0.128767	0.007156199	mutated MAGGIE motif
chr13:31642155_G_A	chr13	31642055	31642255	+	-0.13796	0.031296985	mutated MAGGIE motif
chr13:31642248_C_T	chr13	31642148	31642348	+	-0.137466	0.031296985	mutated MAGGIE motif
chr13:33543663_C_T	chr13	33543563	33543763	+	0.148513	0.017585949	mutated MAGGIE motif
chr13:33697862_A_G	chr13	33697762	33697962	+	-0.126474	0.027962058	mutated MAGGIE motif
chr13:33697875_A_T	chr13	33697775	33697975	+	-0.126346	0.027962058	mutated MAGGIE motif
chr13:33761265_G_T	chr13	33761165	33761365	+	0.13015	0.03474167	mutated MAGGIE motif
chr13:33781765_A_G	chr13	33781665	33781865	+	-0.144657	0.011428192	mutated MAGGIE motif
chr13:33781896_C_G	chr13	33781796	33781996	+	-0.132262	0.017189162	mutated MAGGIE motif
chr13:34070659_T_C	chr13	34070559	34070759	+	0.133877	0.035683142	mutated MAGGIE motif
chr13:34084052_C_T	chr13	34083952	34084152	+	-0.144926	0.006409781	mutated MAGGIE motif
chr13:34302817_C_T	chr13	34302717	34302917	+	-0.211879	0.001118614	mutated MAGGIE motif
chr13:34855123_T_C	chr13	34855023	34855223	+	-0.248632	0.001040979	mutated MAGGIE motif
chr13:34965411_T_G	chr13	34965311	34965511	+	0.191515	0.009501375	mutated MAGGIE motif
chr13:36849980_A_T	chr13	36849880	36850080	+	-0.331557	1.48E-07	mutated MAGGIE motif
chr13:36850012_G_A	chr13	36849912	36850112	+	-0.331417	1.48E-07	mutated MAGGIE motif
chr13:37574708_G_A	chr13	37574608	37574808	+	-0.096031	0.045136062	mutated MAGGIE motif
chr13:37881141_A_G	chr13	37881041	37881241	+	-0.110346	0.027322352	mutated MAGGIE motif
chr13:39984791_C_T	chr13	39984691	39984891	+	-0.133595	0.04051137	mutated MAGGIE motif
chr13:39984946_T_C	chr13	39984846	39985046	+	0.164193	0.001542507	mutated MAGGIE motif
chr13:40474827_T_C	chr13	40474727	40474927	+	-0.112431	0.024106888	mutated MAGGIE motif
chr13:40705706_C_T	chr13	40705606	40705806	+	-0.345277	6.32E-12	mutated MAGGIE motif
chr13:42597055_T_C	chr13	42596955	42597155	+	-0.173727	0.012903809	mutated MAGGIE motif
chr13:43390045_A_C	chr13	43389945	43390145	+	-0.20141	0.013501496	mutated MAGGIE motif
chr13:43465831_A_G	chr13	43465731	43465931	+	-0.325715	7.05E-08	mutated MAGGIE motif
chr13:43468933_T_C	chr13	43468833	43469033	+	-0.087577	0.049191144	mutated MAGGIE motif
chr13:43469157_G_A	chr13	43469057	43469257	+	-0.087633	0.049191144	mutated MAGGIE motif
chr13:43597706_C_T	chr13	43597606	43597806	+	-0.186932	0.0026039	mutated MAGGIE motif
chr13:44806375_A_G	chr13	44806275	44806475	+	-0.126739	0.001052626	mutated MAGGIE motif
chr13:44817584_G_A	chr13	44817484	44817684	+	0.126152	0.011830998	mutated MAGGIE motif
chr13:44845443_G_A	chr13	44845343	44845543	+	0.207684	0.022892908	mutated MAGGIE motif
chr13:45222640_TG_T	chr13	45222540	45222740	+	-0.224015	0.002467261	mutated MAGGIE motif
chr13:45222796_T_A	chr13	45222696	45222896	+	-0.224428	0.002467261	mutated MAGGIE motif
chr13:46913213_C_T	chr13	46913113	46913313	+	-0.142688	0.035413901	mutated MAGGIE motif
chr13:46913489_C_T	chr13	46913389	46913589	+	-0.142672	0.035413901	mutated MAGGIE motif
chr13:48695572_T_G	chr13	48695472	48695672	+	-0.106425	0.036729064	mutated MAGGIE motif
chr13:49428142_G_C	chr13	49428042	49428242	+	0.305155	4.71E-05	mutated MAGGIE motif
chr13:49757889_C_T	chr13	49757789	49757989	+	0.095644	0.022192082	mutated MAGGIE motif
chr13:49757996_G_A	chr13	49757896	49758096	+	-0.106441	0.017262604	mutated MAGGIE motif
chr13:49758145_A_G	chr13	49758045	49758245	+	-0.106356	0.017262604	mutated MAGGIE motif
chr13:51761535_C_A	chr13	51761435	51761635	+	-0.186258	0.000774055	mutated MAGGIE motif
chr13:51815441_A_G	chr13	51815341	51815541	+	-0.17068	0.02099817	mutated MAGGIE motif
chr13:52531363_C_A	chr13	52531263	52531463	+	0.176486	0.045540311	mutated MAGGIE motif
chr13:53009048_C_T	chr13	53008948	53009148	+	-0.144687	0.000967984	mutated MAGGIE motif
chr13:59660451_T_C	chr13	59660351	59660551	+	0.242917	7.43E-05	mutated MAGGIE motif
chr13:59660510_G_C	chr13	59660410	59660610	+	0.227271	0.000153106	mutated MAGGIE motif
chr13:59686647_T_A	chr13	59686547	59686747	+	0.137663	0.024166128	mutated MAGGIE motif
chr13:59840654_T_C	chr13	59840554	59840754	+	-0.153341	0.011587004	mutated MAGGIE motif
chr13:59840748_C_T	chr13	59840648	59840848	+	-0.093934	0.035230628	mutated MAGGIE motif
chr13:60066560_G_A	chr13	60066460	60066660	+	0.181008	0.001163274	mutated MAGGIE motif
chr13:64008141_G_T	chr13	64008041	64008241	+	-0.188887	0.018587576	mutated MAGGIE motif
chr13:64808660_G_A	chr13	64808560	64808760	+	0.284511	2.56E-06	mutated MAGGIE motif
chr13:65124700_T_C	chr13	65124600	65124800	+	-0.233085	0.000216134	mutated MAGGIE motif
chr13:66382391_A_T	chr13	66382291	66382491	+	0.15482	0.028735635	mutated MAGGIE motif
chr13:67669988_T_G	chr13	67669888	67670088	+	-0.164097	0.034823106	mutated MAGGIE motif
chr13:71276189_C_T	chr13	71276089	71276289	+	-0.218659	0.00515007	mutated MAGGIE motif
chr13:73574414_C_G	chr13	73574314	73574514	+	0.244139	1.58E-07	mutated MAGGIE motif
chr13:73605985_C_T	chr13	73605885	73606085	+	-0.209707	0.003094051	mutated MAGGIE motif
chr13:73829235_C_T	chr13	73829135	73829335	+	-0.185172	0.000236145	mutated MAGGIE motif
chr13:73829242_G_C	chr13	73829142	73829342	+	-0.185191	0.000236145	mutated MAGGIE motif
chr13:73829299_T_C	chr13	73829199	73829399	+	0.176975	0.000236145	mutated MAGGIE motif
chr13:73829367_G_C	chr13	73829267	73829467	+	0.177487	0.000236145	mutated MAGGIE motif
chr13:73829455_C_T	chr13	73829355	73829555	+	0.177018	0.000236145	mutated MAGGIE motif
chr13:75900892_C_T	chr13	75900792	75900992	+	0.084616	0.047217738	mutated MAGGIE motif
chr13:76362739_T_C	chr13	76362639	76362839	+	0.323338	9.68E-10	mutated MAGGIE motif
chr13:77021889_T_C	chr13	77021789	77021989	+	0.212341	0.012926064	mutated MAGGIE motif
chr13:77292891_A_T	chr13	77292791	77292991	+	-0.142081	0.011650587	mutated MAGGIE motif
chr13:77307826_G_T	chr13	77307726	77307926	+	0.125721	0.047858679	mutated MAGGIE motif
chr13:77307953_T_G	chr13	77307853	77308053	+	-0.112164	0.047858679	mutated MAGGIE motif
chr13:78448699_C_A	chr13	78448599	78448799	+	-0.194389	0.012417962	mutated MAGGIE motif
chr13:78695302_A_T	chr13	78695202	78695402	+	0.193912	0.002283896	mutated MAGGIE motif
chr13:79274440_C_T	chr13	79274340	79274540	+	-0.111724	0.010270889	mutated MAGGIE motif
chr13:79274470_A_G	chr13	79274370	79274570	+	-0.117452	0.006192253	mutated MAGGIE motif
chr13:79274672_G_C	chr13	79274572	79274772	+	-0.110809	0.010804622	mutated MAGGIE motif
chr13:80008957_T_C	chr13	80008857	80009057	+	-0.16208	0.00276226	mutated MAGGIE motif
chr13:80412461_G_A	chr13	80412361	80412561	+	0.129406	0.045041193	mutated MAGGIE motif
chr13:80457535_G_A	chr13	80457435	80457635	+	0.175656	0.005626156	mutated MAGGIE motif
chr13:80683625_A_G	chr13	80683525	80683725	+	-0.124386	0.004479013	mutated MAGGIE motif
chr13:90465272_G_A	chr13	90465172	90465372	+	-0.096865	0.038999935	mutated MAGGIE motif
chr13:92021834_T_A	chr13	92021734	92021934	+	-0.334986	2.21E-08	mutated MAGGIE motif
chr13:95906694_C_T	chr13	95906594	95906794	+	-0.151847	0.025875703	mutated MAGGIE motif
chr13:96176034_C_A	chr13	96175934	96176134	+	0.203312	0.012638414	mutated MAGGIE motif
chr13:98496595_T_C	chr13	98496495	98496695	+	0.172893	0.020094856	mutated MAGGIE motif
chr13:99474763_G_A	chr13	99474663	99474863	+	0.198152	0.008692666	mutated MAGGIE motif
chr13:99657295_A_T	chr13	99657195	99657395	+	-0.161425	0.035016668	mutated MAGGIE motif
chr14:100064674_A_G	chr14	100064574	100064774	+	-0.206042	0.008084568	mutated MAGGIE motif
chr14:100852820_C_T	chr14	100852720	100852920	+	0.162553	0.007611437	mutated MAGGIE motif
chr14:103431870_T_C	chr14	103431770	103431970	+	0.114747	0.034368363	mutated MAGGIE motif
chr14:103474291_T_G	chr14	103474191	103474391	+	0.15348	0.042265016	mutated MAGGIE motif
chr14:103903054_A_G	chr14	103902954	103903154	+	-0.122054	0.036224281	mutated MAGGIE motif
chr14:21183167_A_G	chr14	21183067	21183267	+	-0.153018	0.014602538	mutated MAGGIE motif
chr14:22136810_T_C	chr14	22136710	22136910	+	0.383501	2.75E-09	mutated MAGGIE motif
chr14:22136829_C_T	chr14	22136729	22136929	+	0.383504	2.75E-09	mutated MAGGIE motif
chr14:22289359_A_C	chr14	22289259	22289459	+	0.199499	0.017124783	mutated MAGGIE motif
chr14:22989292_A_T	chr14	22989192	22989392	+	-0.260466	0.000152854	mutated MAGGIE motif
chr14:23019164_C_T	chr14	23019064	23019264	+	0.160266	0.001788911	mutated MAGGIE motif
chr14:23019209_A_T	chr14	23019109	23019309	+	0.160308	0.001788911	mutated MAGGIE motif
chr14:23128339_C_T	chr14	23128239	23128439	+	-0.186284	0.024527882	mutated MAGGIE motif
chr14:23128443_G_A	chr14	23128343	23128543	+	-0.186284	0.024527882	mutated MAGGIE motif
chr14:25850832_T_A	chr14	25850732	25850932	+	-0.193298	0.005228533	mutated MAGGIE motif
chr14:28852185_C_T	chr14	28852085	28852285	+	0.100299	0.038818533	mutated MAGGIE motif
chr14:28852294_G_T	chr14	28852194	28852394	+	0.106734	0.038818533	mutated MAGGIE motif
chr14:28984747_A_G	chr14	28984647	28984847	+	0.196705	0.007567437	mutated MAGGIE motif
chr14:28984912_A_G	chr14	28984812	28985012	+	0.193425	0.007567437	mutated MAGGIE motif
chr14:31507220_T_C	chr14	31507120	31507320	+	0.186979	0.016202951	mutated MAGGIE motif
chr14:32425370_G_C	chr14	32425270	32425470	+	-0.208929	0.002988894	mutated MAGGIE motif
chr14:32777079_T_C	chr14	32776979	32777179	+	0.275233	6.89E-06	mutated MAGGIE motif
chr14:32777161_A_G	chr14	32777061	32777261	+	-0.407992	1.70E-12	mutated MAGGIE motif
chr14:33075706_T_C	chr14	33075606	33075806	+	0.351843	9.19E-09	mutated MAGGIE motif
chr14:34001941_C_T	chr14	34001841	34002041	+	0.12226	0.019769588	mutated MAGGIE motif
chr14:34034087_C_T	chr14	34033987	34034187	+	0.10641	0.026628426	mutated MAGGIE motif
chr14:34155683_A_G	chr14	34155583	34155783	+	0.133834	0.003306051	mutated MAGGIE motif
chr14:34162087_G_A	chr14	34161987	34162187	+	0.22919	5.91E-05	mutated MAGGIE motif
chr14:38558553_T_G	chr14	38558453	38558653	+	0.179298	0.041586361	mutated MAGGIE motif
chr14:39961735_C_T	chr14	39961635	39961835	+	-0.145042	0.027414493	mutated MAGGIE motif
chr14:50863608_G_T	chr14	50863508	50863708	+	0.134349	0.004140888	mutated MAGGIE motif
chr14:51125240_T_C	chr14	51125140	51125340	+	0.157932	0.000218251	mutated MAGGIE motif
chr14:51632246_C_T	chr14	51632146	51632346	+	0.283018	0.00034408	mutated MAGGIE motif
chr14:51760134_C_T	chr14	51760034	51760234	+	0.194842	0.001468807	mutated MAGGIE motif
chr14:52045828_T_A	chr14	52045728	52045928	+	0.211303	0.004607947	mutated MAGGIE motif
chr14:52075152_A_C	chr14	52075052	52075252	+	0.192562	0.012981174	mutated MAGGIE motif
chr14:54394012_G_A	chr14	54393912	54394112	+	-0.177433	0.013318761	mutated MAGGIE motif
chr14:54394137_G_A	chr14	54394037	54394237	+	-0.177533	0.013318761	mutated MAGGIE motif
chr14:54410599_T_C	chr14	54410499	54410699	+	-0.30362	8.96E-06	mutated MAGGIE motif
chr14:55179243_G_A	chr14	55179143	55179343	+	-0.185466	0.001408775	mutated MAGGIE motif
chr14:55494091_G_A	chr14	55493991	55494191	+	0.09046	0.049920481	mutated MAGGIE motif
chr14:58199749_T_C	chr14	58199649	58199849	+	0.106254	0.028856272	mutated MAGGIE motif
chr14:58214043_C_T	chr14	58213943	58214143	+	0.263918	9.23E-05	mutated MAGGIE motif
chr14:59296184_T_C	chr14	59296084	59296284	+	0.184524	0.017126493	mutated MAGGIE motif
chr14:59296247_C_T	chr14	59296147	59296347	+	-0.269595	5.15E-06	mutated MAGGIE motif
chr14:59748893_G_A	chr14	59748793	59748993	+	0.136815	0.008342506	mutated MAGGIE motif
chr14:59749007_G_T	chr14	59748907	59749107	+	0.136839	0.008342506	mutated MAGGIE motif
chr14:59749187_T_A	chr14	59749087	59749287	+	0.136887	0.008342506	mutated MAGGIE motif
chr14:59921091_C_T	chr14	59920991	59921191	+	0.138082	0.004284458	mutated MAGGIE motif
chr14:59943468_G_T	chr14	59943368	59943568	+	-0.219245	0.003821143	mutated MAGGIE motif
chr14:61557206_T_A	chr14	61557106	61557306	+	-0.194353	0.006205508	mutated MAGGIE motif
chr14:63660125_C_T	chr14	63660025	63660225	+	0.124667	0.005701452	mutated MAGGIE motif
chr14:63685783_C_A	chr14	63685683	63685883	+	0.243169	0.003268832	mutated MAGGIE motif
chr14:63685819_T_A	chr14	63685719	63685919	+	-0.214612	0.003268832	mutated MAGGIE motif
chr14:65546722_A_C	chr14	65546622	65546822	+	0.221001	1.46E-05	mutated MAGGIE motif
chr14:65734600_G_A	chr14	65734500	65734700	+	-0.119911	0.025513224	mutated MAGGIE motif
chr14:65734871_A_G	chr14	65734771	65734971	+	0.136833	0.00885147	mutated MAGGIE motif
chr14:65799348_A_T	chr14	65799248	65799448	+	-0.16699	0.02951467	mutated MAGGIE motif
chr14:66258528_T_C	chr14	66258428	66258628	+	0.195155	0.040417002	mutated MAGGIE motif
chr14:66512464_T_C	chr14	66512364	66512564	+	-0.140728	0.037232624	mutated MAGGIE motif
chr14:68760141_C_T	chr14	68760041	68760241	+	0.137042	0.014540914	mutated MAGGIE motif
chr14:69162671_T_C	chr14	69162571	69162771	+	0.280421	2.29E-06	mutated MAGGIE motif
chr14:69181968_T_C	chr14	69181868	69182068	+	-0.131743	0.032029947	mutated MAGGIE motif
chr14:69182036_C_T	chr14	69181936	69182136	+	-0.209169	0.000252053	mutated MAGGIE motif
chr14:69182119_G_C	chr14	69182019	69182219	+	-0.200254	0.000252053	mutated MAGGIE motif
chr14:69182120_C_G	chr14	69182020	69182220	+	-0.200254	0.000252053	mutated MAGGIE motif
chr14:70487291_A_G	chr14	70487191	70487391	+	0.204461	0.013191743	mutated MAGGIE motif
chr14:70487396_C_T	chr14	70487296	70487496	+	0.166528	0.048647884	mutated MAGGIE motif
chr14:70487739_T_C	chr14	70487639	70487839	+	0.207313	0.009924099	mutated MAGGIE motif
chr14:70850154_A_G	chr14	70850054	70850254	+	-0.218601	0.012356972	mutated MAGGIE motif
chr14:72022750_G_A	chr14	72022650	72022850	+	0.092149	0.026564721	mutated MAGGIE motif
chr14:73026194_C_T	chr14	73026094	73026294	+	0.188569	0.01056618	mutated MAGGIE motif
chr14:73131539_T_C	chr14	73131439	73131639	+	-0.251813	3.96E-08	mutated MAGGIE motif
chr14:73647174_G_C	chr14	73647074	73647274	+	-0.276711	3.34E-05	mutated MAGGIE motif
chr14:73647233_G_A	chr14	73647133	73647333	+	0.156856	0.014305038	mutated MAGGIE motif
chr14:73932966_T_C	chr14	73932866	73933066	+	-0.092104	0.009291347	mutated MAGGIE motif
chr14:73983422_G_A	chr14	73983322	73983522	+	0.263473	0.003556094	mutated MAGGIE motif
chr14:74548347_A_C	chr14	74548247	74548447	+	0.125008	0.030350703	mutated MAGGIE motif
chr14:75041489_G_C	chr14	75041389	75041589	+	0.227316	0.016801717	mutated MAGGIE motif
chr14:75104905_G_A	chr14	75104805	75105005	+	-0.16193	0.005975225	mutated MAGGIE motif
chr14:75590822_G_A	chr14	75590722	75590922	+	0.135251	3.39E-06	mutated MAGGIE motif
chr14:75590846_A_T	chr14	75590746	75590946	+	-0.13899	3.39E-06	mutated MAGGIE motif
chr14:75626042_A_C	chr14	75625942	75626142	+	0.171759	0.024873555	mutated MAGGIE motif
chr14:76009279_G_A	chr14	76009179	76009379	+	0.183986	0.017754973	mutated MAGGIE motif
chr14:76426723_C_T	chr14	76426623	76426823	+	-0.24523	0.007560619	mutated MAGGIE motif
chr14:76660221_A_G	chr14	76660121	76660321	+	0.203065	0.00738531	mutated MAGGIE motif
chr14:77187061_G_T	chr14	77186961	77187161	+	-0.088579	0.015727047	mutated MAGGIE motif
chr14:81111429_A_G	chr14	81111329	81111529	+	-0.142629	0.033748604	mutated MAGGIE motif
chr14:82123315_G_A	chr14	82123215	82123415	+	-0.180189	0.036679831	mutated MAGGIE motif
chr14:84951576_A_G	chr14	84951476	84951676	+	-0.137099	0.020102284	mutated MAGGIE motif
chr14:85173181_G_C	chr14	85173081	85173281	+	-0.308417	1.42E-12	mutated MAGGIE motif
chr14:85173319_C_A	chr14	85173219	85173419	+	0.311856	1.37E-12	mutated MAGGIE motif
chr14:86074042_A_G	chr14	86073942	86074142	+	0.315463	2.21E-08	mutated MAGGIE motif
chr14:86074191_C_A	chr14	86074091	86074291	+	-0.2382	4.71E-05	mutated MAGGIE motif
chr14:86218546_T_G	chr14	86218446	86218646	+	-0.158429	0.012511417	mutated MAGGIE motif
chr14:88595873_G_A	chr14	88595773	88595973	+	-0.209739	0.000941162	mutated MAGGIE motif
chr14:88595886_A_G	chr14	88595786	88595986	+	-0.209762	0.000941162	mutated MAGGIE motif
chr14:88595898_C_T	chr14	88595798	88595998	+	-0.166913	0.012971985	mutated MAGGIE motif
chr14:90367256_A_G	chr14	90367156	90367356	+	0.195609	0.01782388	mutated MAGGIE motif
chr14:91096910_G_A	chr14	91096810	91097010	+	-0.194104	0.044165922	mutated MAGGIE motif
chr14:91262184_T_C	chr14	91262084	91262284	+	-0.210965	0.006973748	mutated MAGGIE motif
chr14:91262253_G_A	chr14	91262153	91262353	+	0.101448	0.008421904	mutated MAGGIE motif
chr14:91268801_AAGCAGTGACAGAGGGCGCC_A	chr14	91268701	91268901	+	0.104049	0.032017398	mutated MAGGIE motif
chr14:91512339_T_C	chr14	91512239	91512439	+	-0.166975	0.044901235	mutated MAGGIE motif
chr14:91512340_T_C	chr14	91512240	91512440	+	-0.166972	0.044901235	mutated MAGGIE motif
chr14:91810591_C_CATCAG	chr14	91810491	91810691	+	-0.167465	0.022024187	mutated MAGGIE motif
chr14:92446563_T_G	chr14	92446463	92446663	+	0.10812	0.016422276	mutated MAGGIE motif
chr14:93077611_T_C	chr14	93077511	93077711	+	0.182399	0.015609421	mutated MAGGIE motif
chr14:93159453_A_G	chr14	93159353	93159553	+	0.193709	0.003300499	mutated MAGGIE motif
chr14:93159510_T_G	chr14	93159410	93159610	+	0.194057	0.003300499	mutated MAGGIE motif
chr14:93775073_T_C	chr14	93774973	93775173	+	-0.139372	0.015359201	mutated MAGGIE motif
chr14:93956583_C_T	chr14	93956483	93956683	+	0.313624	8.91E-09	mutated MAGGIE motif
chr14:93956584_C_T	chr14	93956484	93956684	+	0.313627	8.91E-09	mutated MAGGIE motif
chr14:93956590_G_A	chr14	93956490	93956690	+	-0.330791	8.91E-09	mutated MAGGIE motif
chr14:95726941_T_C	chr14	95726841	95727041	+	-0.127945	0.004872927	mutated MAGGIE motif
chr14:96612609_G_A	chr14	96612509	96612709	+	-0.157599	0.030353514	mutated MAGGIE motif
chr14:96612682_C_T	chr14	96612582	96612782	+	0.181026	0.013966808	mutated MAGGIE motif
chr14:96765883_C_T	chr14	96765783	96765983	+	0.176276	0.008616423	mutated MAGGIE motif
chr14:96765918_T_C	chr14	96765818	96766018	+	0.176844	0.008616423	mutated MAGGIE motif
chr14:96893747_G_A	chr14	96893647	96893847	+	0.175938	0.046005376	mutated MAGGIE motif
chr15:101439353_T_C	chr15	101439253	101439453	+	-0.137126	0.01607541	mutated MAGGIE motif
chr15:101499261_A_C	chr15	101499161	101499361	+	0.11317	0.010544055	mutated MAGGIE motif
chr15:23076245_G_A	chr15	23076145	23076345	+	-0.116322	0.028308791	mutated MAGGIE motif
chr15:29656920_A_G	chr15	29656820	29657020	+	0.211463	0.005653054	mutated MAGGIE motif
chr15:31749878_C_T	chr15	31749778	31749978	+	0.350447	1.69E-06	mutated MAGGIE motif
chr15:31749972_A_G	chr15	31749872	31750072	+	0.288035	6.15E-05	mutated MAGGIE motif
chr15:33306218_CTCCTCCT_C	chr15	33306118	33306318	+	-0.139266	0.037252925	mutated MAGGIE motif
chr15:33536859_G_A	chr15	33536759	33536959	+	-0.195192	0.025719675	mutated MAGGIE motif
chr15:34983398_G_A	chr15	34983298	34983498	+	0.152379	0.00591952	mutated MAGGIE motif
chr15:34985718_C_G	chr15	34985618	34985818	+	0.184527	0.001566942	mutated MAGGIE motif
chr15:35849809_G_A	chr15	35849709	35849909	+	0.200777	0.005327118	mutated MAGGIE motif
chr15:35849924_T_G	chr15	35849824	35850024	+	0.174648	0.030525265	mutated MAGGIE motif
chr15:36127236_T_C	chr15	36127136	36127336	+	-0.197964	0.006551625	mutated MAGGIE motif
chr15:36143780_C_T	chr15	36143680	36143880	+	0.197199	0.027684887	mutated MAGGIE motif
chr15:36143858_A_G	chr15	36143758	36143958	+	0.234908	0.00753788	mutated MAGGIE motif
chr15:39152435_T_A	chr15	39152335	39152535	+	0.232176	0.000408985	mutated MAGGIE motif
chr15:39152598_C_T	chr15	39152498	39152698	+	0.264618	0.000129691	mutated MAGGIE motif
chr15:39288527_G_C	chr15	39288427	39288627	+	-0.068303	0.045135328	mutated MAGGIE motif
chr15:39288601_A_C	chr15	39288501	39288701	+	-0.102809	0.014144682	mutated MAGGIE motif
chr15:39309082_C_A	chr15	39308982	39309182	+	0.235728	0.002615459	mutated MAGGIE motif
chr15:39319915_T_G	chr15	39319815	39320015	+	0.189345	0.036913517	mutated MAGGIE motif
chr15:39377572_G_A	chr15	39377472	39377672	+	0.164849	0.045700904	mutated MAGGIE motif
chr15:39656166_C_T	chr15	39656066	39656266	+	-0.129475	0.008189126	mutated MAGGIE motif
chr15:39656222_A_C	chr15	39656122	39656322	+	-0.128682	0.008189126	mutated MAGGIE motif
chr15:40559204_T_A	chr15	40559104	40559304	+	-0.141467	0.017356495	mutated MAGGIE motif
chr15:42624699_C_T	chr15	42624599	42624799	+	0.227818	0.000105461	mutated MAGGIE motif
chr15:46195714_C_G	chr15	46195614	46195814	+	0.145404	0.0306373	mutated MAGGIE motif
chr15:46419008_G_A	chr15	46418908	46419108	+	0.231988	0.002191874	mutated MAGGIE motif
chr15:46419082_T_A	chr15	46418982	46419182	+	0.231385	0.002191874	mutated MAGGIE motif
chr15:47676519_A_T	chr15	47676419	47676619	+	0.093772	0.034914609	mutated MAGGIE motif
chr15:47676579_A_T	chr15	47676479	47676679	+	0.082714	0.036415224	mutated MAGGIE motif
chr15:47676716_C_T	chr15	47676616	47676816	+	0.096091	0.034914609	mutated MAGGIE motif
chr15:47719892_A_G	chr15	47719792	47719992	+	-0.342518	5.89E-07	mutated MAGGIE motif
chr15:48714948_C_G	chr15	48714848	48715048	+	0.147592	0.010044833	mutated MAGGIE motif
chr15:50433468_T_C	chr15	50433368	50433568	+	-0.274059	9.58E-06	mutated MAGGIE motif
chr15:50433520_T_G	chr15	50433420	50433620	+	-0.284338	1.36E-06	mutated MAGGIE motif
chr15:52013538_A_AGGCAG	chr15	52013438	52013638	+	-0.087603	0.017829109	mutated MAGGIE motif
chr15:52013544_C_T	chr15	52013444	52013644	+	-0.087622	0.017829109	mutated MAGGIE motif
chr15:52013545_A_T	chr15	52013445	52013645	+	-0.087621	0.017829109	mutated MAGGIE motif
chr15:52130231_G_A	chr15	52130131	52130331	+	-0.099721	0.048995571	mutated MAGGIE motif
chr15:52505947_A_G	chr15	52505847	52506047	+	-0.205309	0.016307563	mutated MAGGIE motif
chr15:56189592_A_G	chr15	56189492	56189692	+	0.106663	0.024474157	mutated MAGGIE motif
chr15:57613121_A_G	chr15	57613021	57613221	+	0.134135	0.023273631	mutated MAGGIE motif
chr15:57677246_G_A	chr15	57677146	57677346	+	-0.185445	0.000197652	mutated MAGGIE motif
chr15:57677266_C_T	chr15	57677166	57677366	+	-0.184655	0.000197652	mutated MAGGIE motif
chr15:57829375_G_A	chr15	57829275	57829475	+	0.142049	0.007015997	mutated MAGGIE motif
chr15:57859275_T_A	chr15	57859175	57859375	+	0.15945	0.037199542	mutated MAGGIE motif
chr15:57863424_A_T	chr15	57863324	57863524	+	-0.163115	0.001957156	mutated MAGGIE motif
chr15:57863465_C_T	chr15	57863365	57863565	+	0.112373	0.001957156	mutated MAGGIE motif
chr15:58170992_G_A	chr15	58170892	58171092	+	-0.097064	0.023957375	mutated MAGGIE motif
chr15:58182592_T_C	chr15	58182492	58182692	+	-0.251007	3.55E-06	mutated MAGGIE motif
chr15:58182614_T_C	chr15	58182514	58182714	+	0.158839	0.026028181	mutated MAGGIE motif
chr15:58182673_T_C	chr15	58182573	58182773	+	-0.272654	2.24E-07	mutated MAGGIE motif
chr15:58661680_G_A	chr15	58661580	58661780	+	0.305373	0.000334537	mutated MAGGIE motif
chr15:58762209_G_A	chr15	58762109	58762309	+	0.160939	0.001768086	mutated MAGGIE motif
chr15:58762273_G_A	chr15	58762173	58762373	+	0.159362	0.001768086	mutated MAGGIE motif
chr15:59529575_C_T	chr15	59529475	59529675	+	-0.12158	0.024274045	mutated MAGGIE motif
chr15:59894617_C_T	chr15	59894517	59894717	+	-0.265586	0.000352576	mutated MAGGIE motif
chr15:62213597_G_A	chr15	62213497	62213697	+	0.136536	0.01202548	mutated MAGGIE motif
chr15:62413696_G_A	chr15	62413596	62413796	+	0.103635	0.044074055	mutated MAGGIE motif
chr15:63172083_C_T	chr15	63171983	63172183	+	-0.27779	1.80E-08	mutated MAGGIE motif
chr15:63172112_T_C	chr15	63172012	63172212	+	-0.277782	1.80E-08	mutated MAGGIE motif
chr15:63172121_T_C	chr15	63172021	63172221	+	-0.277789	1.80E-08	mutated MAGGIE motif
chr15:63192772_C_G	chr15	63192672	63192872	+	-0.192004	0.000975596	mutated MAGGIE motif
chr15:63233030_C_G	chr15	63232930	63233130	+	0.135611	0.039530209	mutated MAGGIE motif
chr15:63265133_C_T	chr15	63265033	63265233	+	0.13429	0.00647266	mutated MAGGIE motif
chr15:63265156_T_C	chr15	63265056	63265256	+	0.341132	7.99E-09	mutated MAGGIE motif
chr15:63265395_G_A	chr15	63265295	63265495	+	0.12213	0.009343489	mutated MAGGIE motif
chr15:63414723_T_C	chr15	63414623	63414823	+	0.122268	0.006395189	mutated MAGGIE motif
chr15:63523855_G_C	chr15	63523755	63523955	+	0.181695	0.003059861	mutated MAGGIE motif
chr15:64275409_C_T	chr15	64275309	64275509	+	-0.14783	0.031596666	mutated MAGGIE motif
chr15:65165436_C_T	chr15	65165336	65165536	+	-0.261595	1.43E-05	mutated MAGGIE motif
chr15:65187857_A_C	chr15	65187757	65187957	+	-0.099958	0.040242882	mutated MAGGIE motif
chr15:65398658_A_AC	chr15	65398558	65398758	+	-0.215347	0.007662316	mutated MAGGIE motif
chr15:67240697_T_C	chr15	67240597	67240797	+	0.21744	0.003230253	mutated MAGGIE motif
chr15:67318612_T_C	chr15	67318512	67318712	+	-0.209574	8.07E-06	mutated MAGGIE motif
chr15:67320382_C_T	chr15	67320282	67320482	+	0.132187	0.039419066	mutated MAGGIE motif
chr15:67381711_G_A	chr15	67381611	67381811	+	-0.171508	0.000326626	mutated MAGGIE motif
chr15:67409910_C_T	chr15	67409810	67410010	+	0.112269	0.036838412	mutated MAGGIE motif
chr15:67442596_C_T	chr15	67442496	67442696	+	-0.143592	0.004226336	mutated MAGGIE motif
chr15:69596676_C_T	chr15	69596576	69596776	+	0.136339	0.020084303	mutated MAGGIE motif
chr15:69598126_T_A	chr15	69598026	69598226	+	-0.129555	0.034629285	mutated MAGGIE motif
chr15:70452747_A_G	chr15	70452647	70452847	+	0.286153	5.91E-07	mutated MAGGIE motif
chr15:70452902_G_T	chr15	70452802	70453002	+	-0.195373	0.003610394	mutated MAGGIE motif
chr15:70563984_A_T	chr15	70563884	70564084	+	-0.09144	0.045544163	mutated MAGGIE motif
chr15:70581578_G_A	chr15	70581478	70581678	+	-0.322025	1.93E-07	mutated MAGGIE motif
chr15:70581589_G_T	chr15	70581489	70581689	+	-0.322918	1.93E-07	mutated MAGGIE motif
chr15:70581757_G_A	chr15	70581657	70581857	+	0.190142	0.000274598	mutated MAGGIE motif
chr15:71081053_T_C	chr15	71080953	71081153	+	0.227363	0.002005941	mutated MAGGIE motif
chr15:71081062_C_T	chr15	71080962	71081162	+	0.227192	0.002005941	mutated MAGGIE motif
chr15:71081064_C_T	chr15	71080964	71081164	+	0.227188	0.002005941	mutated MAGGIE motif
chr15:71144988_G_A	chr15	71144888	71145088	+	-0.134317	0.002713082	mutated MAGGIE motif
chr15:71869384_G_A	chr15	71869284	71869484	+	0.182489	0.043235817	mutated MAGGIE motif
chr15:71869472_A_G	chr15	71869372	71869572	+	0.158851	0.043235817	mutated MAGGIE motif
chr15:74822444_A_G	chr15	74822344	74822544	+	0.122547	0.018298115	mutated MAGGIE motif
chr15:75718669_G_T	chr15	75718569	75718769	+	0.154779	0.003044872	mutated MAGGIE motif
chr15:77022825_T_C	chr15	77022725	77022925	+	0.228224	0.004236222	mutated MAGGIE motif
chr15:77838419_T_C	chr15	77838319	77838519	+	0.276051	6.56E-06	mutated MAGGIE motif
chr15:77838491_C_T	chr15	77838391	77838591	+	0.276332	6.56E-06	mutated MAGGIE motif
chr15:77838535_C_G	chr15	77838435	77838635	+	0.276633	6.56E-06	mutated MAGGIE motif
chr15:81366407_T_C	chr15	81366307	81366507	+	0.208319	0.020624257	mutated MAGGIE motif
chr15:81398047_A_T	chr15	81397947	81398147	+	0.113495	0.031523628	mutated MAGGIE motif
chr15:83869144_G_A	chr15	83869044	83869244	+	0.251224	0.000239706	mutated MAGGIE motif
chr15:85840167_T_C	chr15	85840067	85840267	+	0.154429	0.000456323	mutated MAGGIE motif
chr15:85840329_T_C	chr15	85840229	85840429	+	0.154193	0.000456323	mutated MAGGIE motif
chr15:86127408_A_G	chr15	86127308	86127508	+	-0.19585	0.00019116	mutated MAGGIE motif
chr15:86127561_G_C	chr15	86127461	86127661	+	-0.195745	0.00019116	mutated MAGGIE motif
chr15:87698088_G_A	chr15	87697988	87698188	+	0.218694	0.009116381	mutated MAGGIE motif
chr15:89252012_T_A	chr15	89251912	89252112	+	0.30209	0.000445994	mutated MAGGIE motif
chr15:89426219_G_C	chr15	89426119	89426319	+	0.199921	0.011194705	mutated MAGGIE motif
chr15:89731175_A_G	chr15	89731075	89731275	+	0.120307	0.044672592	mutated MAGGIE motif
chr15:89731347_G_C	chr15	89731247	89731447	+	0.120457	0.044672592	mutated MAGGIE motif
chr15:89774212_A_C	chr15	89774112	89774312	+	0.238157	0.000304481	mutated MAGGIE motif
chr15:89774325_G_T	chr15	89774225	89774425	+	0.23807	0.000304481	mutated MAGGIE motif
chr15:89860786_A_C	chr15	89860686	89860886	+	0.110613	0.024424367	mutated MAGGIE motif
chr15:90901511_C_T	chr15	90901411	90901611	+	-0.251248	0.000449951	mutated MAGGIE motif
chr15:92058631_A_G	chr15	92058531	92058731	+	0.130446	0.029152359	mutated MAGGIE motif
chr15:92564085_G_A	chr15	92563985	92564185	+	0.172322	0.031304862	mutated MAGGIE motif
chr15:92564168_T_C	chr15	92564068	92564268	+	0.188674	0.031304862	mutated MAGGIE motif
chr15:92564182_T_C	chr15	92564082	92564282	+	0.188591	0.031304862	mutated MAGGIE motif
chr15:92564183_G_A	chr15	92564083	92564283	+	0.188591	0.031304862	mutated MAGGIE motif
chr15:92564197_G_A	chr15	92564097	92564297	+	0.188615	0.031304862	mutated MAGGIE motif
chr15:93375510_C_T	chr15	93375410	93375610	+	-0.157516	0.010915078	mutated MAGGIE motif
chr15:95752562_G_A	chr15	95752462	95752662	+	-0.147791	0.015342706	mutated MAGGIE motif
chr15:96164290_A_G	chr15	96164190	96164390	+	-0.108159	0.035600732	mutated MAGGIE motif
chr15:99090692_C_A	chr15	99090592	99090792	+	0.158893	0.022645544	mutated MAGGIE motif
chr15:99664045_G_A	chr15	99663945	99664145	+	-0.213477	3.76E-05	mutated MAGGIE motif
chr16:11012695_C_T	chr16	11012595	11012795	+	-0.221388	8.97E-05	mutated MAGGIE motif
chr16:11624245_G_A	chr16	11624145	11624345	+	-0.150765	0.025664496	mutated MAGGIE motif
chr16:12010444_A_C	chr16	12010344	12010544	+	0.137417	0.031866298	mutated MAGGIE motif
chr16:12511737_T_C	chr16	12511637	12511837	+	-0.180103	0.001439668	mutated MAGGIE motif
chr16:12707613_C_T	chr16	12707513	12707713	+	0.222249	0.001826819	mutated MAGGIE motif
chr16:12707723_G_A	chr16	12707623	12707823	+	0.223546	0.001826819	mutated MAGGIE motif
chr16:14374731_A_AT	chr16	14374631	14374831	+	0.207234	0.002017278	mutated MAGGIE motif
chr16:16077874_C_T	chr16	16077774	16077974	+	0.135872	0.038965633	mutated MAGGIE motif
chr16:16098091_C_CAA	chr16	16097991	16098191	+	-0.129673	0.034644103	mutated MAGGIE motif
chr16:16099701_T_C	chr16	16099601	16099801	+	-0.192278	0.006225119	mutated MAGGIE motif
chr16:16099966_C_T	chr16	16099866	16100066	+	-0.19244	0.006225119	mutated MAGGIE motif
chr16:16156395_G_C	chr16	16156295	16156495	+	0.309063	0.000123294	mutated MAGGIE motif
chr16:19606891_G_A	chr16	19606791	19606991	+	-0.28826	6.16E-07	mutated MAGGIE motif
chr16:19777705_C_A	chr16	19777605	19777805	+	-0.211254	0.000625138	mutated MAGGIE motif
chr16:21088130_T_C	chr16	21088030	21088230	+	0.320739	4.22E-07	mutated MAGGIE motif
chr16:23680286_A_G	chr16	23680186	23680386	+	0.187662	0.002111239	mutated MAGGIE motif
chr16:24704219_A_C	chr16	24704119	24704319	+	-0.183798	0.00015955	mutated MAGGIE motif
chr16:24704390_C_T	chr16	24704290	24704490	+	-0.183403	0.00015955	mutated MAGGIE motif
chr16:24704418_C_T	chr16	24704318	24704518	+	-0.183783	0.00015955	mutated MAGGIE motif
chr16:24712999_G_T	chr16	24712899	24713099	+	-0.14484	0.008058628	mutated MAGGIE motif
chr16:24713104_A_G	chr16	24713004	24713204	+	-0.144227	0.008058628	mutated MAGGIE motif
chr16:24781372_A_G	chr16	24781272	24781472	+	-0.216789	8.63E-06	mutated MAGGIE motif
chr16:24999307_G_A	chr16	24999207	24999407	+	0.096941	0.023163294	mutated MAGGIE motif
chr16:27343479_A_G	chr16	27343379	27343579	+	0.085659	0.027917332	mutated MAGGIE motif
chr16:27343515_T_C	chr16	27343415	27343615	+	0.082503	0.02857431	mutated MAGGIE motif
chr16:2880105_C_T	chr16	2880005	2880205	+	0.169085	0.037320282	mutated MAGGIE motif
chr16:2925923_A_G	chr16	2925823	2926023	+	-0.243798	0.004277445	mutated MAGGIE motif
chr16:31129942_C_T	chr16	31129842	31130042	+	0.086797	0.023427354	mutated MAGGIE motif
chr16:4210803_A_G	chr16	4210703	4210903	+	0.226883	0.004268444	mutated MAGGIE motif
chr16:4538114_G_A	chr16	4538014	4538214	+	-0.127399	0.006687595	mutated MAGGIE motif
chr16:50099747_A_G	chr16	50099647	50099847	+	-0.139928	0.006305299	mutated MAGGIE motif
chr16:50099777_C_T	chr16	50099677	50099877	+	0.13992	0.006305299	mutated MAGGIE motif
chr16:50152024_C_A	chr16	50151924	50152124	+	0.281697	0.000142103	mutated MAGGIE motif
chr16:50739450_G_A	chr16	50739350	50739550	+	0.139469	0.018703213	mutated MAGGIE motif
chr16:51573119_C_T	chr16	51573019	51573219	+	0.172282	0.040766326	mutated MAGGIE motif
chr16:52107099_T_C	chr16	52106999	52107199	+	0.183443	0.037395102	mutated MAGGIE motif
chr16:53111350_C_G	chr16	53111250	53111450	+	0.197292	0.008778307	mutated MAGGIE motif
chr16:53851304_G_A	chr16	53851204	53851404	+	0.179264	0.027362596	mutated MAGGIE motif
chr16:53857263_C_T	chr16	53857163	53857363	+	0.24026	0.000749333	mutated MAGGIE motif
chr16:58383228_C_A	chr16	58383128	58383328	+	-0.251374	1.32E-07	mutated MAGGIE motif
chr16:60176608_A_G	chr16	60176508	60176708	+	0.155435	0.045177527	mutated MAGGIE motif
chr16:60177008_A_G	chr16	60176908	60177108	+	-0.155502	0.023267016	mutated MAGGIE motif
chr16:60177204_A_C	chr16	60177104	60177304	+	-0.155721	0.023267016	mutated MAGGIE motif
chr16:63487958_A_G	chr16	63487858	63488058	+	0.288324	0.000516729	mutated MAGGIE motif
chr16:65736594_A_C	chr16	65736494	65736694	+	0.165285	0.039555986	mutated MAGGIE motif
chr16:65779503_A_G	chr16	65779403	65779603	+	-0.175796	0.016013716	mutated MAGGIE motif
chr16:65867502_G_A	chr16	65867402	65867602	+	0.1389	0.010384934	mutated MAGGIE motif
chr16:65872996_G_A	chr16	65872896	65873096	+	0.129655	0.017377965	mutated MAGGIE motif
chr16:68176415_C_A	chr16	68176315	68176515	+	0.140634	0.048040101	mutated MAGGIE motif
chr16:69797192_T_A	chr16	69797092	69797292	+	0.160542	0.012331484	mutated MAGGIE motif
chr16:71963186_C_T	chr16	71963086	71963286	+	0.156421	0.00478704	mutated MAGGIE motif
chr16:73024276_C_T	chr16	73024176	73024376	+	0.172894	0.000712481	mutated MAGGIE motif
chr16:74637821_A_G	chr16	74637721	74637921	+	0.114885	0.042927593	mutated MAGGIE motif
chr16:75394148_G_A	chr16	75394048	75394248	+	0.277621	4.48E-05	mutated MAGGIE motif
chr16:75394175_AC_A	chr16	75394075	75394275	+	0.277498	4.48E-05	mutated MAGGIE motif
chr16:75580411_G_A	chr16	75580311	75580511	+	0.166218	0.037654924	mutated MAGGIE motif
chr16:76379375_T_G	chr16	76379275	76379475	+	0.2078	0.000325423	mutated MAGGIE motif
chr16:77268660_C_G	chr16	77268560	77268760	+	0.253904	0.00019695	mutated MAGGIE motif
chr16:77268791_T_G	chr16	77268691	77268891	+	0.253904	0.00019695	mutated MAGGIE motif
chr16:77421194_A_T	chr16	77421094	77421294	+	0.326659	8.18E-07	mutated MAGGIE motif
chr16:77533525_A_G	chr16	77533425	77533625	+	0.159271	0.019795699	mutated MAGGIE motif
chr16:77628308_T_TC	chr16	77628208	77628408	+	-0.125484	0.002416704	mutated MAGGIE motif
chr16:77628333_A_G	chr16	77628233	77628433	+	-0.125611	0.002416704	mutated MAGGIE motif
chr16:80233014_C_T	chr16	80232914	80233114	+	0.189974	0.003832716	mutated MAGGIE motif
chr16:80233141_C_T	chr16	80233041	80233241	+	0.190165	0.003832716	mutated MAGGIE motif
chr16:80617473_A_C	chr16	80617373	80617573	+	0.202708	0.003168318	mutated MAGGIE motif
chr16:80617613_T_C	chr16	80617513	80617713	+	0.29524	2.33E-06	mutated MAGGIE motif
chr16:80617693_T_G	chr16	80617593	80617793	+	0.294486	2.33E-06	mutated MAGGIE motif
chr16:81026927_C_T	chr16	81026827	81027027	+	-0.109464	0.004175191	mutated MAGGIE motif
chr16:81026994_G_A	chr16	81026894	81027094	+	-0.109309	0.004175191	mutated MAGGIE motif
chr16:81027003_A_G	chr16	81026903	81027103	+	-0.109321	0.004175191	mutated MAGGIE motif
chr16:81027142_G_A	chr16	81027042	81027242	+	-0.080695	0.040222394	mutated MAGGIE motif
chr16:81254536_C_A	chr16	81254436	81254636	+	-0.188843	0.045408861	mutated MAGGIE motif
chr16:81565383_C_T	chr16	81565283	81565483	+	-0.167755	0.005706685	mutated MAGGIE motif
chr16:81658664_G_T	chr16	81658564	81658764	+	0.180218	0.009216287	mutated MAGGIE motif
chr16:82636436_C_T	chr16	82636336	82636536	+	0.299681	8.77E-05	mutated MAGGIE motif
chr16:82691564_A_G	chr16	82691464	82691664	+	-0.159695	0.030686639	mutated MAGGIE motif
chr16:83209154_T_G	chr16	83209054	83209254	+	0.157538	0.008947783	mutated MAGGIE motif
chr16:83209289_G_A	chr16	83209189	83209389	+	0.141821	0.013445339	mutated MAGGIE motif
chr16:84208891_G_C	chr16	84208791	84208991	+	-0.168486	0.007165108	mutated MAGGIE motif
chr16:84209080_G_A	chr16	84208980	84209180	+	0.130215	0.043305287	mutated MAGGIE motif
chr16:84233536_C_T	chr16	84233436	84233636	+	-0.17188	0.025338547	mutated MAGGIE motif
chr16:85032954_A_T	chr16	85032854	85033054	+	-0.166692	0.004674	mutated MAGGIE motif
chr16:85368575_C_A	chr16	85368475	85368675	+	-0.170113	0.026852505	mutated MAGGIE motif
chr16:85801365_C_A	chr16	85801265	85801465	+	0.119488	0.001096866	mutated MAGGIE motif
chr16:85801445_G_A	chr16	85801345	85801545	+	-0.115791	0.001096866	mutated MAGGIE motif
chr16:86423307_A_C	chr16	86423207	86423407	+	-0.169035	0.010327891	mutated MAGGIE motif
chr16:86702158_C_T	chr16	86702058	86702258	+	0.239788	0.000725715	mutated MAGGIE motif
chr16:86751981_C_G	chr16	86751881	86752081	+	0.211478	0.000361026	mutated MAGGIE motif
chr16:86752158_G_C	chr16	86752058	86752258	+	0.251783	2.76E-05	mutated MAGGIE motif
chr16:86802880_G_A	chr16	86802780	86802980	+	-0.157973	0.012468871	mutated MAGGIE motif
chr16:86811277_A_T	chr16	86811177	86811377	+	0.158149	0.025167747	mutated MAGGIE motif
chr16:86811464_AGT_A	chr16	86811364	86811564	+	-0.158157	0.025167747	mutated MAGGIE motif
chr16:86811467_T_C	chr16	86811367	86811567	+	-0.158157	0.025167747	mutated MAGGIE motif
chr16:87987367_C_A	chr16	87987267	87987467	+	-0.104446	0.049736287	mutated MAGGIE motif
chr16:88651220_A_G	chr16	88651120	88651320	+	-0.153037	0.011819948	mutated MAGGIE motif
chr16:88651295_C_T	chr16	88651195	88651395	+	0.167021	0.011819948	mutated MAGGIE motif
chr17:1026117_G_A	chr17	1026017	1026217	+	-0.182581	0.000163445	mutated MAGGIE motif
chr17:1026163_C_T	chr17	1026063	1026263	+	-0.182709	0.000163445	mutated MAGGIE motif
chr17:15394395_C_A	chr17	15394295	15394495	+	0.148855	0.010590399	mutated MAGGIE motif
chr17:15404812_T_C	chr17	15404712	15404912	+	-0.223263	6.91E-06	mutated MAGGIE motif
chr17:15915072_A_G	chr17	15914972	15915172	+	0.254379	0.000172529	mutated MAGGIE motif
chr17:1781889_G_A	chr17	1781789	1781989	+	0.24783	0.000785912	mutated MAGGIE motif
chr17:19301729_T_A	chr17	19301629	19301829	+	-0.145238	0.022846265	mutated MAGGIE motif
chr17:19322062_G_A	chr17	19321962	19322162	+	0.14884	0.041607937	mutated MAGGIE motif
chr17:21431819_T_C	chr17	21431719	21431919	+	-0.157074	0.043347507	mutated MAGGIE motif
chr17:26137663_G_A	chr17	26137563	26137763	+	-0.190255	0.008915467	mutated MAGGIE motif
chr17:27460259_C_G	chr17	27460159	27460359	+	-0.158357	0.034615125	mutated MAGGIE motif
chr17:27740273_A_C	chr17	27740173	27740373	+	-0.122783	0.016090576	mutated MAGGIE motif
chr17:30224419_G_A	chr17	30224319	30224519	+	0.307173	1.11E-05	mutated MAGGIE motif
chr17:30822607_C_T	chr17	30822507	30822707	+	-0.19186	0.003734076	mutated MAGGIE motif
chr17:30822620_C_G	chr17	30822520	30822720	+	-0.191972	0.003734076	mutated MAGGIE motif
chr17:31142041_C_A	chr17	31141941	31142141	+	0.176736	0.017998231	mutated MAGGIE motif
chr17:32740067_T_C	chr17	32739967	32740167	+	-0.096946	0.030593816	mutated MAGGIE motif
chr17:32740225_G_A	chr17	32740125	32740325	+	-0.094014	0.030593816	mutated MAGGIE motif
chr17:34361416_G_A	chr17	34361316	34361516	+	0.182951	0.011854132	mutated MAGGIE motif
chr17:3545112_G_A	chr17	3545012	3545212	+	0.139644	0.015371796	mutated MAGGIE motif
chr17:3545127_G_A	chr17	3545027	3545227	+	0.218987	0.000289152	mutated MAGGIE motif
chr17:3880148_C_T	chr17	3880048	3880248	+	0.257218	0.000227738	mutated MAGGIE motif
chr17:39254444_T_C	chr17	39254344	39254544	+	-0.146942	0.038589837	mutated MAGGIE motif
chr17:39621062_G_C	chr17	39620962	39621162	+	-0.093306	0.041640906	mutated MAGGIE motif
chr17:39697420_T_TGCAGGAA	chr17	39697320	39697520	+	-0.161421	0.024138354	mutated MAGGIE motif
chr17:39697570_A_C	chr17	39697470	39697670	+	-0.128793	0.047984149	mutated MAGGIE motif
chr17:4056003_G_A	chr17	4055903	4056103	+	0.211346	0.007721566	mutated MAGGIE motif
chr17:41150949_G_A	chr17	41150849	41151049	+	-0.144801	0.035251839	mutated MAGGIE motif
chr17:41438235_GTAACCTTTAACTCAA_G	chr17	41438135	41438335	+	0.127136	0.035676313	mutated MAGGIE motif
chr17:41438584_C_G	chr17	41438484	41438684	+	0.141574	0.034536433	mutated MAGGIE motif
chr17:41438609_G_C	chr17	41438509	41438709	+	0.141509	0.034536433	mutated MAGGIE motif
chr17:42210298_T_C	chr17	42210198	42210398	+	0.145747	0.012707576	mutated MAGGIE motif
chr17:43058742_T_C	chr17	43058642	43058842	+	0.154868	0.008020919	mutated MAGGIE motif
chr17:44344552_C_T	chr17	44344452	44344652	+	0.144537	0.023617181	mutated MAGGIE motif
chr17:44357172_C_T	chr17	44357072	44357272	+	0.250371	9.48E-06	mutated MAGGIE motif
chr17:44357297_G_T	chr17	44357197	44357397	+	0.2499	9.48E-06	mutated MAGGIE motif
chr17:44357351_T_C	chr17	44357251	44357451	+	0.24995	9.48E-06	mutated MAGGIE motif
chr17:44357392_C_A	chr17	44357292	44357492	+	0.249568	9.48E-06	mutated MAGGIE motif
chr17:44357412_TC_T	chr17	44357312	44357512	+	0.249885	9.48E-06	mutated MAGGIE motif
chr17:44362865_A_C	chr17	44362765	44362965	+	0.230428	0.004159925	mutated MAGGIE motif
chr17:44364335_G_A	chr17	44364235	44364435	+	0.159478	0.025210013	mutated MAGGIE motif
chr17:44364519_C_G	chr17	44364419	44364619	+	0.16029	0.025210013	mutated MAGGIE motif
chr17:46208793_A_T	chr17	46208693	46208893	+	0.152775	0.032497644	mutated MAGGIE motif
chr17:46993370_G_A	chr17	46993270	46993470	+	0.103415	0.045282531	mutated MAGGIE motif
chr17:49230900_C_T	chr17	49230800	49231000	+	-0.093544	0.03797595	mutated MAGGIE motif
chr17:504459_A_G	chr17	504359	504559	+	-0.168271	0.017736931	mutated MAGGIE motif
chr17:53654510_G_A	chr17	53654410	53654610	+	0.153127	0.034890434	mutated MAGGIE motif
chr17:54976922_C_A	chr17	54976822	54977022	+	0.196826	0.006494874	mutated MAGGIE motif
chr17:57841357_A_G	chr17	57841257	57841457	+	0.133075	0.021386186	mutated MAGGIE motif
chr17:57930646_G_T	chr17	57930546	57930746	+	0.089961	0.048589525	mutated MAGGIE motif
chr17:60882344_G_T	chr17	60882244	60882444	+	0.197089	0.003189047	mutated MAGGIE motif
chr17:60882401_A_G	chr17	60882301	60882501	+	0.197242	0.003189047	mutated MAGGIE motif
chr17:61528041_G_C	chr17	61527941	61528141	+	-0.081782	0.020495086	mutated MAGGIE motif
chr17:61614517_G_A	chr17	61614417	61614617	+	0.162364	0.049751934	mutated MAGGIE motif
chr17:62676149_A_G	chr17	62676049	62676249	+	-0.229978	7.17E-06	mutated MAGGIE motif
chr17:63280001_G_A	chr17	63279901	63280101	+	0.133235	0.00076181	mutated MAGGIE motif
chr17:63773564_G_A	chr17	63773464	63773664	+	-0.160334	0.041633738	mutated MAGGIE motif
chr17:64282145_G_T	chr17	64282045	64282245	+	-0.122974	0.028542604	mutated MAGGIE motif
chr17:65605075_A_G	chr17	65604975	65605175	+	-0.295126	3.50E-06	mutated MAGGIE motif
chr17:66432355_C_G	chr17	66432255	66432455	+	-0.199123	0.000876646	mutated MAGGIE motif
chr17:70903286_T_C	chr17	70903186	70903386	+	-0.141353	0.005375097	mutated MAGGIE motif
chr17:73185657_A_G	chr17	73185557	73185757	+	-0.118996	0.030272396	mutated MAGGIE motif
chr17:73585233_G_A	chr17	73585133	73585333	+	0.202769	0.024726187	mutated MAGGIE motif
chr17:73585356_G_A	chr17	73585256	73585456	+	0.202432	0.024726187	mutated MAGGIE motif
chr17:73585392_G_C	chr17	73585292	73585492	+	0.186444	0.024726187	mutated MAGGIE motif
chr17:73585401_CAAGGGGCGGGGCCGCGGGAAAGCGGAT_C	chr17	73585301	73585501	+	0.186472	0.024726187	mutated MAGGIE motif
chr17:73585544_G_A	chr17	73585444	73585644	+	0.171322	0.024726187	mutated MAGGIE motif
chr17:73585550_A_G	chr17	73585450	73585650	+	0.171438	0.024726187	mutated MAGGIE motif
chr17:73585559_G_C	chr17	73585459	73585659	+	0.171291	0.024726187	mutated MAGGIE motif
chr17:7358861_T_C	chr17	7358761	7358961	+	0.116507	0.027590107	mutated MAGGIE motif
chr17:73674105_G_A	chr17	73674005	73674205	+	0.144804	0.033500996	mutated MAGGIE motif
chr17:74087827_T_C	chr17	74087727	74087927	+	-0.158781	0.012603112	mutated MAGGIE motif
chr17:74087996_G_A	chr17	74087896	74088096	+	-0.158698	0.012603112	mutated MAGGIE motif
chr17:74480969_T_G	chr17	74480869	74481069	+	0.24133	0.001974696	mutated MAGGIE motif
chr17:74595846_A_C	chr17	74595746	74595946	+	-0.226108	0.002882109	mutated MAGGIE motif
chr17:74595847_A_AC	chr17	74595747	74595947	+	-0.226108	0.002882109	mutated MAGGIE motif
chr17:74596032_T_G	chr17	74595932	74596132	+	-0.226439	0.002882109	mutated MAGGIE motif
chr17:75128195_C_T	chr17	75128095	75128295	+	-0.154508	0.009292108	mutated MAGGIE motif
chr17:75184673_C_T	chr17	75184573	75184773	+	0.200229	0.006051633	mutated MAGGIE motif
chr17:75321193_A_G	chr17	75321093	75321293	+	-0.111712	0.030430984	mutated MAGGIE motif
chr17:75325613_A_G	chr17	75325513	75325713	+	0.162061	0.020184076	mutated MAGGIE motif
chr17:76026671_T_C	chr17	76026571	76026771	+	-0.223087	0.00087008	mutated MAGGIE motif
chr17:76223213_C_T	chr17	76223113	76223313	+	0.177836	0.014884935	mutated MAGGIE motif
chr17:7653601_A_G	chr17	7653501	7653701	+	-0.133079	0.040682524	mutated MAGGIE motif
chr17:77906681_T_G	chr17	77906581	77906781	+	-0.236274	0.003083881	mutated MAGGIE motif
chr17:77906736_G_A	chr17	77906636	77906836	+	0.232591	0.000846078	mutated MAGGIE motif
chr17:78253934_C_T	chr17	78253834	78254034	+	0.186089	0.009994424	mutated MAGGIE motif
chr17:78865999_A_C	chr17	78865899	78866099	+	-0.197117	0.004474937	mutated MAGGIE motif
chr17:79319618_C_T	chr17	79319518	79319718	+	0.119921	0.019318211	mutated MAGGIE motif
chr17:8023165_C_T	chr17	8023065	8023265	+	-0.115051	0.013673423	mutated MAGGIE motif
chr17:80851950_A_AAGGGACTGTTTCTTTCTGTTTCGGTAATAGGAAGTGTTTTG	chr17	80851850	80852050	+	0.126491	0.023424323	mutated MAGGIE motif
chr17:9306760_A_G	chr17	9306660	9306860	+	0.149226	0.032800626	mutated MAGGIE motif
chr18:11523973_C_A	chr18	11523873	11524073	+	-0.173403	0.01124705	mutated MAGGIE motif
chr18:11523990_T_A	chr18	11523890	11524090	+	-0.173068	0.01124705	mutated MAGGIE motif
chr18:11524024_T_C	chr18	11523924	11524124	+	-0.173196	0.01124705	mutated MAGGIE motif
chr18:11524262_G_T	chr18	11524162	11524362	+	-0.17557	0.01124705	mutated MAGGIE motif
chr18:12660285_T_G	chr18	12660185	12660385	+	0.109043	0.0348371	mutated MAGGIE motif
chr18:12703067_A_G	chr18	12702967	12703167	+	0.092988	0.03133274	mutated MAGGIE motif
chr18:20311555_C_A	chr18	20311455	20311655	+	-0.119873	0.037161517	mutated MAGGIE motif
chr18:20563550_C_T	chr18	20563450	20563650	+	-0.126513	0.041942792	mutated MAGGIE motif
chr18:26271517_C_G	chr18	26271417	26271617	+	0.322606	2.87E-08	mutated MAGGIE motif
chr18:26271580_C_G	chr18	26271480	26271680	+	0.322448	2.87E-08	mutated MAGGIE motif
chr18:26271678_A_C	chr18	26271578	26271778	+	0.322611	2.87E-08	mutated MAGGIE motif
chr18:26271756_G_A	chr18	26271656	26271856	+	0.322534	2.87E-08	mutated MAGGIE motif
chr18:2978689_T_C	chr18	2978589	2978789	+	-0.204145	0.004946242	mutated MAGGIE motif
chr18:32676553_G_GACTC	chr18	32676453	32676653	+	0.223536	0.002792137	mutated MAGGIE motif
chr18:33040875_T_C	chr18	33040775	33040975	+	-0.117829	0.031202585	mutated MAGGIE motif
chr18:33293807_C_T	chr18	33293707	33293907	+	-0.092183	0.021646103	mutated MAGGIE motif
chr18:33432881_C_T	chr18	33432781	33432981	+	-0.211645	0.000990908	mutated MAGGIE motif
chr18:354264_C_T	chr18	354164	354364	+	0.191605	0.006921593	mutated MAGGIE motif
chr18:362173_G_A	chr18	362073	362273	+	-0.151659	0.029229277	mutated MAGGIE motif
chr18:362199_A_G	chr18	362099	362299	+	-0.187479	0.012006586	mutated MAGGIE motif
chr18:3649896_T_C	chr18	3649796	3649996	+	-0.165448	0.001013188	mutated MAGGIE motif
chr18:3650044_G_A	chr18	3649944	3650144	+	-0.182614	0.000944275	mutated MAGGIE motif
chr18:3652972_A_G	chr18	3652872	3653072	+	-0.075233	0.044764347	mutated MAGGIE motif
chr18:37950477_A_G	chr18	37950377	37950577	+	-0.174116	0.003696864	mutated MAGGIE motif
chr18:395650_G_A	chr18	395550	395750	+	0.157498	0.008125559	mutated MAGGIE motif
chr18:39772981_C_G	chr18	39772881	39773081	+	-0.316955	2.69E-06	mutated MAGGIE motif
chr18:41772564_G_T	chr18	41772464	41772664	+	0.248389	0.001275719	mutated MAGGIE motif
chr18:43335899_C_T	chr18	43335799	43335999	+	-0.062393	0.035864264	mutated MAGGIE motif
chr18:43336143_G_A	chr18	43336043	43336243	+	0.069544	0.033372038	mutated MAGGIE motif
chr18:43561914_G_A	chr18	43561814	43562014	+	-0.138445	0.008483297	mutated MAGGIE motif
chr18:43561996_T_C	chr18	43561896	43562096	+	-0.299978	2.37E-06	mutated MAGGIE motif
chr18:43562013_T_G	chr18	43561913	43562113	+	-0.298832	2.37E-06	mutated MAGGIE motif
chr18:43562102_C_A	chr18	43562002	43562202	+	-0.140534	0.008483297	mutated MAGGIE motif
chr18:43562201_G_C	chr18	43562101	43562301	+	-0.299868	2.37E-06	mutated MAGGIE motif
chr18:43580729_C_G	chr18	43580629	43580829	+	-0.165412	0.024375434	mutated MAGGIE motif
chr18:43833701_T_TCTG	chr18	43833601	43833801	+	-0.159496	0.029287389	mutated MAGGIE motif
chr18:45549972_T_C	chr18	45549872	45550072	+	-0.141472	0.031772213	mutated MAGGIE motif
chr18:45550214_A_T	chr18	45550114	45550314	+	-0.141237	0.031772213	mutated MAGGIE motif
chr18:45550297_C_T	chr18	45550197	45550397	+	-0.141332	0.031772213	mutated MAGGIE motif
chr18:47174258_G_A	chr18	47174158	47174358	+	-0.251306	0.000451836	mutated MAGGIE motif
chr18:47174310_T_C	chr18	47174210	47174410	+	-0.251533	0.000451836	mutated MAGGIE motif
chr18:47174320_T_G	chr18	47174220	47174420	+	-0.251532	0.000451836	mutated MAGGIE motif
chr18:47174380_A_G	chr18	47174280	47174480	+	-0.253742	0.000451836	mutated MAGGIE motif
chr18:47179901_A_T	chr18	47179801	47180001	+	-0.286837	2.79E-05	mutated MAGGIE motif
chr18:47212252_A_G	chr18	47212152	47212352	+	0.077638	0.021068446	mutated MAGGIE motif
chr18:47405019_A_T	chr18	47404919	47405119	+	-0.236172	0.010548666	mutated MAGGIE motif
chr18:50208831_C_T	chr18	50208731	50208931	+	0.295799	6.69E-06	mutated MAGGIE motif
chr18:50208888_G_A	chr18	50208788	50208988	+	-0.261039	0.000231205	mutated MAGGIE motif
chr18:50208962_G_A	chr18	50208862	50209062	+	-0.24063	0.000610435	mutated MAGGIE motif
chr18:51762290_AT_A	chr18	51762190	51762390	+	0.22067	6.38E-05	mutated MAGGIE motif
chr18:51762473_G_C	chr18	51762373	51762573	+	0.242031	3.71E-06	mutated MAGGIE motif
chr18:52407476_G_C	chr18	52407376	52407576	+	0.12389	0.009189024	mutated MAGGIE motif
chr18:52443103_T_A	chr18	52443003	52443203	+	0.104386	0.04188544	mutated MAGGIE motif
chr18:5254081_C_T	chr18	5253981	5254181	+	0.2983	3.66E-05	mutated MAGGIE motif
chr18:5254130_A_T	chr18	5254030	5254230	+	0.216619	0.002118525	mutated MAGGIE motif
chr18:5455063_T_C	chr18	5454963	5455163	+	0.196	0.002791588	mutated MAGGIE motif
chr18:55137504_G_A	chr18	55137404	55137604	+	0.178257	0.045302073	mutated MAGGIE motif
chr18:55451373_G_T	chr18	55451273	55451473	+	0.159642	0.002665644	mutated MAGGIE motif
chr18:55451476_G_A	chr18	55451376	55451576	+	0.160041	0.002665644	mutated MAGGIE motif
chr18:55968327_T_G	chr18	55968227	55968427	+	-0.165761	0.03524659	mutated MAGGIE motif
chr18:55983330_T_C	chr18	55983230	55983430	+	-0.139603	0.003563781	mutated MAGGIE motif
chr18:56006279_G_C	chr18	56006179	56006379	+	-0.244332	0.000155369	mutated MAGGIE motif
chr18:56006316_A_G	chr18	56006216	56006416	+	-0.243605	0.000155369	mutated MAGGIE motif
chr18:56609986_A_G	chr18	56609886	56610086	+	0.300201	8.92E-07	mutated MAGGIE motif
chr18:57086806_G_T	chr18	57086706	57086906	+	0.194224	0.043655326	mutated MAGGIE motif
chr18:57181744_C_T	chr18	57181644	57181844	+	0.271771	2.30E-06	mutated MAGGIE motif
chr18:57181845_C_T	chr18	57181745	57181945	+	0.272692	2.30E-06	mutated MAGGIE motif
chr18:58688538_G_T	chr18	58688438	58688638	+	0.189428	0.007145762	mutated MAGGIE motif
chr18:58688556_C_T	chr18	58688456	58688656	+	0.198508	0.005313162	mutated MAGGIE motif
chr18:58688697_G_A	chr18	58688597	58688797	+	0.219893	0.003227925	mutated MAGGIE motif
chr18:59369292_T_A	chr18	59369192	59369392	+	-0.10853	0.02748355	mutated MAGGIE motif
chr18:59527791_A_G	chr18	59527691	59527891	+	-0.141747	0.043829037	mutated MAGGIE motif
chr18:66175662_C_T	chr18	66175562	66175762	+	0.210072	0.0037661	mutated MAGGIE motif
chr18:67902105_C_T	chr18	67902005	67902205	+	0.150597	0.040542564	mutated MAGGIE motif
chr18:7267670_A_G	chr18	7267570	7267770	+	0.173261	0.022757858	mutated MAGGIE motif
chr18:7267748_T_A	chr18	7267648	7267848	+	0.201987	0.014463917	mutated MAGGIE motif
chr18:7267767_G_T	chr18	7267667	7267867	+	0.17385	0.022757858	mutated MAGGIE motif
chr18:74277779_G_T	chr18	74277679	74277879	+	-0.130504	0.024794749	mutated MAGGIE motif
chr18:74277880_T_G	chr18	74277780	74277980	+	0.129879	0.024794749	mutated MAGGIE motif
chr18:74477758_A_T	chr18	74477658	74477858	+	-0.293211	8.85E-05	mutated MAGGIE motif
chr18:74779490_A_G	chr18	74779390	74779590	+	-0.159271	0.008761425	mutated MAGGIE motif
chr18:74779614_C_A	chr18	74779514	74779714	+	0.115963	0.008761425	mutated MAGGIE motif
chr18:77551738_A_G	chr18	77551638	77551838	+	0.135001	0.046722576	mutated MAGGIE motif
chr18:8468117_A_G	chr18	8468017	8468217	+	-0.177426	0.038084372	mutated MAGGIE motif
chr18:8800723_T_C	chr18	8800623	8800823	+	-0.241789	0.001488487	mutated MAGGIE motif
chr18:8987427_G_A	chr18	8987327	8987527	+	0.226848	0.005385898	mutated MAGGIE motif
chr18:9321217_C_T	chr18	9321117	9321317	+	0.120154	0.000807202	mutated MAGGIE motif
chr18:9321276_C_A	chr18	9321176	9321376	+	-0.20623	0.000807202	mutated MAGGIE motif
chr19:11302807_G_A	chr19	11302707	11302907	+	-0.226188	0.000535703	mutated MAGGIE motif
chr19:11466151_T_C	chr19	11466051	11466251	+	-0.10449	0.031733451	mutated MAGGIE motif
chr19:13732365_A_G	chr19	13732265	13732465	+	-0.156418	0.042790635	mutated MAGGIE motif
chr19:13834244_A_G	chr19	13834144	13834344	+	-0.150806	0.004563401	mutated MAGGIE motif
chr19:13875186_C_G	chr19	13875086	13875286	+	-0.13012	0.03130075	mutated MAGGIE motif
chr19:13875210_C_G	chr19	13875110	13875310	+	-0.13012	0.03130075	mutated MAGGIE motif
chr19:13875234_C_G	chr19	13875134	13875334	+	-0.13012	0.03130075	mutated MAGGIE motif
chr19:13875258_C_G	chr19	13875158	13875358	+	-0.130486	0.03130075	mutated MAGGIE motif
chr19:14628524_C_T	chr19	14628424	14628624	+	0.122604	0.048860742	mutated MAGGIE motif
chr19:16151576_C_G	chr19	16151476	16151676	+	-0.204196	0.003092647	mutated MAGGIE motif
chr19:16151675_A_G	chr19	16151575	16151775	+	-0.20425	0.003092647	mutated MAGGIE motif
chr19:16151732_T_C	chr19	16151632	16151832	+	0.242702	5.48E-05	mutated MAGGIE motif
chr19:17186519_CT_C	chr19	17186419	17186619	+	-0.114746	0.022948003	mutated MAGGIE motif
chr19:17219105_G_A	chr19	17219005	17219205	+	-0.137675	1.24E-05	mutated MAGGIE motif
chr19:17378159_T_C	chr19	17378059	17378259	+	0.122014	0.03481017	mutated MAGGIE motif
chr19:18314917_G_T	chr19	18314817	18315017	+	-0.117643	0.028987566	mutated MAGGIE motif
chr19:18337260_G_A	chr19	18337160	18337360	+	-0.131882	0.014158338	mutated MAGGIE motif
chr19:19173418_T_G	chr19	19173318	19173518	+	-0.145895	0.019355774	mutated MAGGIE motif
chr19:2161443_G_A	chr19	2161343	2161543	+	-0.142709	0.037648332	mutated MAGGIE motif
chr19:32843002_G_A	chr19	32842902	32843102	+	-0.112888	0.030286572	mutated MAGGIE motif
chr19:33999990_C_T	chr19	33999890	34000090	+	0.258934	0.01287243	mutated MAGGIE motif
chr19:34000018_C_T	chr19	33999918	34000118	+	0.25882	0.01287243	mutated MAGGIE motif
chr19:34364064_A_G	chr19	34363964	34364164	+	0.205405	0.008293971	mutated MAGGIE motif
chr19:34767771_C_T	chr19	34767671	34767871	+	0.131703	0.047884372	mutated MAGGIE motif
chr19:35950523_A_G	chr19	35950423	35950623	+	-0.17913	0.039551155	mutated MAGGIE motif
chr19:39684649_G_A	chr19	39684549	39684749	+	0.16358	0.018960026	mutated MAGGIE motif
chr19:39684692_T_G	chr19	39684592	39684792	+	0.163484	0.018960026	mutated MAGGIE motif
chr19:39684764_G_C	chr19	39684664	39684864	+	0.163552	0.018960026	mutated MAGGIE motif
chr19:39684769_G_C	chr19	39684669	39684869	+	0.163576	0.018960026	mutated MAGGIE motif
chr19:39684864_C_T	chr19	39684764	39684964	+	0.163525	0.018960026	mutated MAGGIE motif
chr19:39684909_A_C	chr19	39684809	39685009	+	0.163547	0.018960026	mutated MAGGIE motif
chr19:41913267_A_C	chr19	41913167	41913367	+	-0.198234	0.000322587	mutated MAGGIE motif
chr19:41913431_G_T	chr19	41913331	41913531	+	-0.260021	9.47E-06	mutated MAGGIE motif
chr19:45196107_T_C	chr19	45196007	45196207	+	0.139799	0.00821646	mutated MAGGIE motif
chr19:45196135_A_G	chr19	45196035	45196235	+	0.218438	5.51E-05	mutated MAGGIE motif
chr19:45699240_C_T	chr19	45699140	45699340	+	0.326249	2.80E-05	mutated MAGGIE motif
chr19:45971095_G_A	chr19	45970995	45971195	+	0.095494	0.045912887	mutated MAGGIE motif
chr19:46072061_T_C	chr19	46071961	46072161	+	-0.117808	0.037997393	mutated MAGGIE motif
chr19:46313758_G_C	chr19	46313658	46313858	+	-0.201262	0.007084888	mutated MAGGIE motif
chr19:46792666_C_T	chr19	46792566	46792766	+	0.119715	0.017830234	mutated MAGGIE motif
chr19:46792673_A_C	chr19	46792573	46792773	+	0.119879	0.017830234	mutated MAGGIE motif
chr19:46974652_G_C	chr19	46974552	46974752	+	0.214482	0.001599258	mutated MAGGIE motif
chr19:46974748_C_G	chr19	46974648	46974848	+	0.214418	0.001599258	mutated MAGGIE motif
chr19:46974752_G_C	chr19	46974652	46974852	+	0.214551	0.001599258	mutated MAGGIE motif
chr19:46974762_A_G	chr19	46974662	46974862	+	0.214559	0.001599258	mutated MAGGIE motif
chr19:46974781_G_A	chr19	46974681	46974881	+	-0.192307	0.002681855	mutated MAGGIE motif
chr19:47120381_A_G	chr19	47120281	47120481	+	-0.160817	0.006200715	mutated MAGGIE motif
chr19:47867763_C_G	chr19	47867663	47867863	+	0.132968	0.032078286	mutated MAGGIE motif
chr19:48279901_C_T	chr19	48279801	48280001	+	0.249254	0.000222232	mutated MAGGIE motif
chr19:48280154_G_A	chr19	48280054	48280254	+	0.278537	5.10E-07	mutated MAGGIE motif
chr19:48713355_T_TAAAGAA	chr19	48713255	48713455	+	0.164685	0.001321172	mutated MAGGIE motif
chr19:48713445_G_T	chr19	48713345	48713545	+	0.164595	0.001321172	mutated MAGGIE motif
chr19:52076481_C_A	chr19	52076381	52076581	+	0.082502	0.030953315	mutated MAGGIE motif
chr19:54023957_A_G	chr19	54023857	54024057	+	0.083038	0.021209705	mutated MAGGIE motif
chr19:54024252_T_A	chr19	54024152	54024352	+	0.087848	0.021209705	mutated MAGGIE motif
chr19:54024255_C_G	chr19	54024155	54024355	+	0.087881	0.021209705	mutated MAGGIE motif
chr19:55030183_A_G	chr19	55030083	55030283	+	0.168777	0.005880581	mutated MAGGIE motif
chr19:57722289_G_C	chr19	57722189	57722389	+	-0.229287	0.001501703	mutated MAGGIE motif
chr19:6616007_A_G	chr19	6615907	6616107	+	-0.094853	0.026721082	mutated MAGGIE motif
chr19:665186_A_G	chr19	665086	665286	+	0.120813	0.019193632	mutated MAGGIE motif
chr19:6661983_T_C	chr19	6661883	6662083	+	0.109423	0.033448246	mutated MAGGIE motif
chr1:100046246_T_G	chr1	100046146	100046346	+	-0.217383	0.000494827	mutated MAGGIE motif
chr1:100140414_T_A	chr1	100140314	100140514	+	0.273727	0.000960951	mutated MAGGIE motif
chr1:101361178_C_T	chr1	101361078	101361278	+	-0.138083	0.037900977	mutated MAGGIE motif
chr1:10271688_C_G	chr1	10271588	10271788	+	0.14987	0.01965711	mutated MAGGIE motif
chr1:10448260_T_G	chr1	10448160	10448360	+	0.241964	3.13E-05	mutated MAGGIE motif
chr1:107962328_G_A	chr1	107962228	107962428	+	0.2218	0.006895085	mutated MAGGIE motif
chr1:108661274_C_T	chr1	108661174	108661374	+	-0.169354	0.001858034	mutated MAGGIE motif
chr1:109356362_G_A	chr1	109356262	109356462	+	0.251473	0.009001052	mutated MAGGIE motif
chr1:110091282_C_T	chr1	110091182	110091382	+	-0.138598	0.044313147	mutated MAGGIE motif
chr1:110365045_G_A	chr1	110364945	110365145	+	0.151542	0.028926516	mutated MAGGIE motif
chr1:111472799_C_T	chr1	111472699	111472899	+	0.218146	0.015961789	mutated MAGGIE motif
chr1:111733724_G_C	chr1	111733624	111733824	+	0.210201	0.001199434	mutated MAGGIE motif
chr1:111786012_T_A	chr1	111785912	111786112	+	0.19804	0.000309928	mutated MAGGIE motif
chr1:113091487_C_T	chr1	113091387	113091587	+	0.16696	0.003438657	mutated MAGGIE motif
chr1:113585261_G_A	chr1	113585161	113585361	+	-0.097913	0.003510157	mutated MAGGIE motif
chr1:11858036_A_G	chr1	11857936	11858136	+	-0.104777	0.031347913	mutated MAGGIE motif
chr1:12021044_T_C	chr1	12020944	12021144	+	0.162415	0.025119963	mutated MAGGIE motif
chr1:12046063_G_T	chr1	12045963	12046163	+	-0.172283	0.001380716	mutated MAGGIE motif
chr1:12662182_A_AAATGACT	chr1	12662082	12662282	+	0.31717	5.17E-07	mutated MAGGIE motif
chr1:146518194_A_C	chr1	146518094	146518294	+	-0.221966	0.0038427	mutated MAGGIE motif
chr1:146518228_C_T	chr1	146518128	146518328	+	-0.175124	0.026909326	mutated MAGGIE motif
chr1:146518236_A_C	chr1	146518136	146518336	+	-0.159169	0.027706201	mutated MAGGIE motif
chr1:147807277_A_G	chr1	147807177	147807377	+	0.139768	0.008691259	mutated MAGGIE motif
chr1:150149016_G_A	chr1	150148916	150149116	+	0.21739	0.003755849	mutated MAGGIE motif
chr1:151813791_G_A	chr1	151813691	151813891	+	0.235362	0.000374113	mutated MAGGIE motif
chr1:151909453_A_C	chr1	151909353	151909553	+	-0.224824	0.000489452	mutated MAGGIE motif
chr1:153005596_A_G	chr1	153005496	153005696	+	-0.16345	0.028161162	mutated MAGGIE motif
chr1:153005597_A_C	chr1	153005497	153005697	+	-0.163417	0.028161162	mutated MAGGIE motif
chr1:153005681_T_G	chr1	153005581	153005781	+	-0.163393	0.028161162	mutated MAGGIE motif
chr1:153461298_T_C	chr1	153461198	153461398	+	-0.273197	0.002743917	mutated MAGGIE motif
chr1:153479481_C_G	chr1	153479381	153479581	+	-0.205663	0.020055573	mutated MAGGIE motif
chr1:153590254_C_A	chr1	153590154	153590354	+	-0.174099	0.011869284	mutated MAGGIE motif
chr1:153876975_A_G	chr1	153876875	153877075	+	-0.172568	0.017261497	mutated MAGGIE motif
chr1:154404380_C_G	chr1	154404280	154404480	+	-0.125727	0.021899049	mutated MAGGIE motif
chr1:154404406_A_C	chr1	154404306	154404506	+	-0.125937	0.021899049	mutated MAGGIE motif
chr1:154589628_A_C	chr1	154589528	154589728	+	-0.096151	0.023463395	mutated MAGGIE motif
chr1:154839799_A_G	chr1	154839699	154839899	+	0.126432	0.006026569	mutated MAGGIE motif
chr1:15504403_T_G	chr1	15504303	15504503	+	0.091833	0.006082866	mutated MAGGIE motif
chr1:15504520_T_G	chr1	15504420	15504620	+	-0.195672	0.000217455	mutated MAGGIE motif
chr1:155618630_G_A	chr1	155618530	155618730	+	-0.077526	0.044549936	mutated MAGGIE motif
chr1:156783292_C_T	chr1	156783192	156783392	+	0.162236	0.024934569	mutated MAGGIE motif
chr1:158675483_T_C	chr1	158675383	158675583	+	0.165831	0.012917201	mutated MAGGIE motif
chr1:159439913_A_G	chr1	159439813	159440013	+	-0.109778	0.024504297	mutated MAGGIE motif
chr1:159653599_C_T	chr1	159653499	159653699	+	-0.161241	0.029390166	mutated MAGGIE motif
chr1:161008572_C_A	chr1	161008472	161008672	+	-0.174096	0.012848368	mutated MAGGIE motif
chr1:161272933_AG_A	chr1	161272833	161273033	+	-0.127755	0.046382803	mutated MAGGIE motif
chr1:161348992_T_C	chr1	161348892	161349092	+	0.238554	0.00285161	mutated MAGGIE motif
chr1:161349026_T_C	chr1	161348926	161349126	+	0.238476	0.00285161	mutated MAGGIE motif
chr1:162305160_G_A	chr1	162305060	162305260	+	0.186563	0.005374664	mutated MAGGIE motif
chr1:162305210_C_T	chr1	162305110	162305310	+	-0.170363	0.009636717	mutated MAGGIE motif
chr1:162306207_A_G	chr1	162306107	162306307	+	0.16139	0.049650236	mutated MAGGIE motif
chr1:162375916_T_C	chr1	162375816	162376016	+	-0.12859	0.045805617	mutated MAGGIE motif
chr1:162679145_G_A	chr1	162679045	162679245	+	-0.122991	0.017446625	mutated MAGGIE motif
chr1:162843606_A_C	chr1	162843506	162843706	+	-0.12138	0.016891725	mutated MAGGIE motif
chr1:163064579_T_A	chr1	163064479	163064679	+	-0.186521	0.007894347	mutated MAGGIE motif
chr1:167569619_C_G	chr1	167569519	167569719	+	0.225762	0.001244641	mutated MAGGIE motif
chr1:167569763_C_G	chr1	167569663	167569863	+	0.233407	0.001244641	mutated MAGGIE motif
chr1:167678404_T_C	chr1	167678304	167678504	+	-0.221482	0.000506281	mutated MAGGIE motif
chr1:169160345_C_A	chr1	169160245	169160445	+	0.189638	0.00794256	mutated MAGGIE motif
chr1:169665551_G_T	chr1	169665451	169665651	+	-0.14063	0.046121263	mutated MAGGIE motif
chr1:169665632_T_C	chr1	169665532	169665732	+	-0.180214	0.020961248	mutated MAGGIE motif
chr1:169835950_A_C	chr1	169835850	169836050	+	-0.173794	0.01344878	mutated MAGGIE motif
chr1:171579628_G_T	chr1	171579528	171579728	+	0.304269	0.000237145	mutated MAGGIE motif
chr1:172363488_A_G	chr1	172363388	172363588	+	-0.258731	6.46E-05	mutated MAGGIE motif
chr1:172898377_T_C	chr1	172898277	172898477	+	0.244511	6.85E-06	mutated MAGGIE motif
chr1:17308254_T_C	chr1	17308154	17308354	+	0.209571	0.000271868	mutated MAGGIE motif
chr1:173171841_A_T	chr1	173171741	173171941	+	-0.146046	0.048197241	mutated MAGGIE motif
chr1:173238736_G_T	chr1	173238636	173238836	+	-0.147451	0.013761358	mutated MAGGIE motif
chr1:17577318_T_C	chr1	17577218	17577418	+	0.16019	0.037245199	mutated MAGGIE motif
chr1:175946171_T_TTGTGAGTCATGGCATTAC	chr1	175946071	175946271	+	0.209863	0.00198075	mutated MAGGIE motif
chr1:177541010_G_T	chr1	177540910	177541110	+	0.191648	0.021639259	mutated MAGGIE motif
chr1:178511924_C_T	chr1	178511824	178512024	+	-0.098337	0.048557686	mutated MAGGIE motif
chr1:179685037_A_G	chr1	179684937	179685137	+	0.101937	0.016977051	mutated MAGGIE motif
chr1:179685053_G_A	chr1	179684953	179685153	+	0.101177	0.016977051	mutated MAGGIE motif
chr1:180476996_A_G	chr1	180476896	180477096	+	0.086162	0.039528741	mutated MAGGIE motif
chr1:181042889_G_A	chr1	181042789	181042989	+	0.136953	0.010843545	mutated MAGGIE motif
chr1:182988991_T_A	chr1	182988891	182989091	+	-0.13082	0.027027787	mutated MAGGIE motif
chr1:183085755_A_G	chr1	183085655	183085855	+	0.20083	0.005743384	mutated MAGGIE motif
chr1:183726404_A_G	chr1	183726304	183726504	+	-0.2317	0.000243331	mutated MAGGIE motif
chr1:183839005_T_C	chr1	183838905	183839105	+	0.29811	6.05E-06	mutated MAGGIE motif
chr1:1840606_G_A	chr1	1840506	1840706	+	-0.126986	0.01072951	mutated MAGGIE motif
chr1:184229807_T_C	chr1	184229707	184229907	+	0.115748	0.024889589	mutated MAGGIE motif
chr1:184521778_G_A	chr1	184521678	184521878	+	0.170854	0.013654426	mutated MAGGIE motif
chr1:185409061_G_A	chr1	185408961	185409161	+	0.186006	0.002272758	mutated MAGGIE motif
chr1:186731937_A_G	chr1	186731837	186732037	+	0.160938	0.039165357	mutated MAGGIE motif
chr1:186999604_A_T	chr1	186999504	186999704	+	-0.19108	5.10E-05	mutated MAGGIE motif
chr1:187414393_T_G	chr1	187414293	187414493	+	-0.158567	0.007770189	mutated MAGGIE motif
chr1:187624470_A_G	chr1	187624370	187624570	+	0.100757	0.041207524	mutated MAGGIE motif
chr1:187660659_A_G	chr1	187660559	187660759	+	-0.254101	5.62E-05	mutated MAGGIE motif
chr1:192229435_A_C	chr1	192229335	192229535	+	0.108876	0.012276154	mutated MAGGIE motif
chr1:193584122_A_G	chr1	193584022	193584222	+	-0.206824	0.015237566	mutated MAGGIE motif
chr1:19775566_G_A	chr1	19775466	19775666	+	-0.130109	0.007874	mutated MAGGIE motif
chr1:198189071_T_A	chr1	198188971	198189171	+	0.155457	0.02378472	mutated MAGGIE motif
chr1:198243300_T_<	chr1	198243200	198243400	+	-0.161932	0.031024556	mutated MAGGIE motif
chr1:199118713_G_A	chr1	199118613	199118813	+	0.188433	0.006332871	mutated MAGGIE motif
chr1:199118810_A_G	chr1	199118710	199118910	+	0.188541	0.006332871	mutated MAGGIE motif
chr1:199824875_A_G	chr1	199824775	199824975	+	-0.337211	1.06E-14	mutated MAGGIE motif
chr1:200050894_C_G	chr1	200050794	200050994	+	0.164974	0.00585603	mutated MAGGIE motif
chr1:200328971_G_A	chr1	200328871	200329071	+	0.205901	0.001754054	mutated MAGGIE motif
chr1:200329009_GTC_G	chr1	200328909	200329109	+	0.200733	0.001754054	mutated MAGGIE motif
chr1:200329011_C_G	chr1	200328911	200329111	+	0.193372	0.002217521	mutated MAGGIE motif
chr1:200669180_A_G	chr1	200669080	200669280	+	-0.299298	8.54E-05	mutated MAGGIE motif
chr1:201096101_AGCCCT_A	chr1	201096001	201096201	+	-0.199943	0.008149591	mutated MAGGIE motif
chr1:201752267_T_A	chr1	201752167	201752367	+	-0.132308	0.034923556	mutated MAGGIE motif
chr1:201752429_A_C	chr1	201752329	201752529	+	-0.13246	0.034923556	mutated MAGGIE motif
chr1:203528810_A_G	chr1	203528710	203528910	+	0.174449	0.005741502	mutated MAGGIE motif
chr1:203746771_T_C	chr1	203746671	203746871	+	0.156994	0.006229631	mutated MAGGIE motif
chr1:203899672_G_A	chr1	203899572	203899772	+	-0.158152	0.014152093	mutated MAGGIE motif
chr1:204233710_T_C	chr1	204233610	204233810	+	0.211764	0.003659796	mutated MAGGIE motif
chr1:204337261_T_C	chr1	204337161	204337361	+	-0.188323	0.020987231	mutated MAGGIE motif
chr1:205240659_T_A	chr1	205240559	205240759	+	0.204378	1.26E-05	mutated MAGGIE motif
chr1:206623866_C_T	chr1	206623766	206623966	+	0.177904	0.046624448	mutated MAGGIE motif
chr1:206783307_C_T	chr1	206783207	206783407	+	0.132631	0.049937466	mutated MAGGIE motif
chr1:207490319_A_G	chr1	207490219	207490419	+	-0.234641	0.00182829	mutated MAGGIE motif
chr1:207494416_T_C	chr1	207494316	207494516	+	0.206598	0.00022333	mutated MAGGIE motif
chr1:207494484_T_TTAGTTACTTCCCCTCCTTCCC	chr1	207494384	207494584	+	0.15979	0.002717668	mutated MAGGIE motif
chr1:208125204_G_C	chr1	208125104	208125304	+	-0.151191	0.033262776	mutated MAGGIE motif
chr1:209979635_C_T	chr1	209979535	209979735	+	-0.203319	0.013754935	mutated MAGGIE motif
chr1:210005168_C_T	chr1	210005068	210005268	+	-0.17598	0.004718464	mutated MAGGIE motif
chr1:210009404_C_T	chr1	210009304	210009504	+	-0.148179	0.047221766	mutated MAGGIE motif
chr1:210009533_G_T	chr1	210009433	210009633	+	-0.173549	0.012141322	mutated MAGGIE motif
chr1:211813010_C_A	chr1	211812910	211813110	+	0.211165	0.004292165	mutated MAGGIE motif
chr1:211813454_C_G	chr1	211813354	211813554	+	0.156495	2.34E-05	mutated MAGGIE motif
chr1:212340677_C_A	chr1	212340577	212340777	+	-0.155488	0.000934033	mutated MAGGIE motif
chr1:212766018_T_C	chr1	212765918	212766118	+	0.156748	0.021058476	mutated MAGGIE motif
chr1:214677026_G_A	chr1	214676926	214677126	+	0.131893	0.03414076	mutated MAGGIE motif
chr1:215075343_T_C	chr1	215075243	215075443	+	-0.149004	0.041234133	mutated MAGGIE motif
chr1:215456074_T_C	chr1	215455974	215456174	+	-0.309036	8.37E-05	mutated MAGGIE motif
chr1:21575564_C_T	chr1	21575464	21575664	+	-0.186656	0.01679238	mutated MAGGIE motif
chr1:21657239_G_A	chr1	21657139	21657339	+	-0.168966	0.024253099	mutated MAGGIE motif
chr1:21894947_C_T	chr1	21894847	21895047	+	-0.170418	0.025384303	mutated MAGGIE motif
chr1:21894995_G_C	chr1	21894895	21895095	+	-0.170529	0.025384303	mutated MAGGIE motif
chr1:219616208_T_G	chr1	219616108	219616308	+	-0.185994	0.000242701	mutated MAGGIE motif
chr1:221047581_C_T	chr1	221047481	221047681	+	0.152044	0.007153272	mutated MAGGIE motif
chr1:221339332_A_C	chr1	221339232	221339432	+	-0.180469	0.006435	mutated MAGGIE motif
chr1:221339380_C_T	chr1	221339280	221339480	+	0.219535	0.000119799	mutated MAGGIE motif
chr1:221507646_C_T	chr1	221507546	221507746	+	0.134659	0.042084654	mutated MAGGIE motif
chr1:222019354_T_C	chr1	222019254	222019454	+	-0.240823	0.001116144	mutated MAGGIE motif
chr1:223931068_C_T	chr1	223930968	223931168	+	0.114458	0.001621385	mutated MAGGIE motif
chr1:223962929_G_A	chr1	223962829	223963029	+	0.231586	0.000100576	mutated MAGGIE motif
chr1:224268137_G_A	chr1	224268037	224268237	+	-0.189855	6.72E-05	mutated MAGGIE motif
chr1:224716713_A_C	chr1	224716613	224716813	+	0.148135	0.000677801	mutated MAGGIE motif
chr1:224716762_G_A	chr1	224716662	224716862	+	0.130559	0.002272554	mutated MAGGIE motif
chr1:224716938_G_C	chr1	224716838	224717038	+	0.1487	0.000677801	mutated MAGGIE motif
chr1:22651579_G_C	chr1	22651479	22651679	+	-0.156777	0.03807657	mutated MAGGIE motif
chr1:227071048_T_C	chr1	227070948	227071148	+	-0.254739	0.000230872	mutated MAGGIE motif
chr1:227598965_A_T	chr1	227598865	227599065	+	0.166271	0.042880347	mutated MAGGIE motif
chr1:227599014_G_A	chr1	227598914	227599114	+	0.166294	0.042880347	mutated MAGGIE motif
chr1:22836499_A_T	chr1	22836399	22836599	+	-0.169279	0.026486863	mutated MAGGIE motif
chr1:228416674_G_A	chr1	228416574	228416774	+	-0.247043	0.000403415	mutated MAGGIE motif
chr1:228416676_T_C	chr1	228416576	228416776	+	-0.247034	0.000403415	mutated MAGGIE motif
chr1:228416712_G_C	chr1	228416612	228416812	+	-0.267463	0.000152149	mutated MAGGIE motif
chr1:231977739_C_T	chr1	231977639	231977839	+	-0.113474	0.026696198	mutated MAGGIE motif
chr1:232820087_G_T	chr1	232819987	232820187	+	0.133568	0.03058979	mutated MAGGIE motif
chr1:232845241_G_A	chr1	232845141	232845341	+	0.11955	0.037887168	mutated MAGGIE motif
chr1:233090935_T_C	chr1	233090835	233091035	+	-0.152451	0.046825716	mutated MAGGIE motif
chr1:233302895_T_C	chr1	233302795	233302995	+	0.255269	0.000940673	mutated MAGGIE motif
chr1:234279644_G_A	chr1	234279544	234279744	+	0.220401	0.002826081	mutated MAGGIE motif
chr1:234763954_T_A	chr1	234763854	234764054	+	0.182637	0.003726594	mutated MAGGIE motif
chr1:234764103_C_T	chr1	234764003	234764203	+	0.186745	0.003726594	mutated MAGGIE motif
chr1:234781444_G_T	chr1	234781344	234781544	+	-0.172497	0.002034749	mutated MAGGIE motif
chr1:234793959_T_C	chr1	234793859	234794059	+	0.138328	0.014745263	mutated MAGGIE motif
chr1:235460867_C_T	chr1	235460767	235460967	+	0.272986	0.001077274	mutated MAGGIE motif
chr1:236021217_A_G	chr1	236021117	236021317	+	0.149561	0.013899106	mutated MAGGIE motif
chr1:236021328_G_A	chr1	236021228	236021428	+	0.149475	0.013899106	mutated MAGGIE motif
chr1:236255034_A_C	chr1	236254934	236255134	+	-0.201603	0.013209286	mutated MAGGIE motif
chr1:237335141_C_T	chr1	237335041	237335241	+	-0.11194	0.022622157	mutated MAGGIE motif
chr1:240637571_A_G	chr1	240637471	240637671	+	0.244192	0.002954961	mutated MAGGIE motif
chr1:241042131_T_C	chr1	241042031	241042231	+	0.201796	0.00216081	mutated MAGGIE motif
chr1:242000426_T_C	chr1	242000326	242000526	+	0.228441	0.000507086	mutated MAGGIE motif
chr1:242000444_T_C	chr1	242000344	242000544	+	0.237705	0.000507086	mutated MAGGIE motif
chr1:242000564_C_T	chr1	242000464	242000664	+	-0.150401	0.025792534	mutated MAGGIE motif
chr1:242054883_AAG_A	chr1	242054783	242054983	+	0.150718	0.004443028	mutated MAGGIE motif
chr1:243783759_A_AT	chr1	243783659	243783859	+	-0.252054	0.001680662	mutated MAGGIE motif
chr1:243783763_A_G	chr1	243783663	243783863	+	-0.252054	0.001680662	mutated MAGGIE motif
chr1:244101789_T_C	chr1	244101689	244101889	+	-0.099588	0.037038504	mutated MAGGIE motif
chr1:244251650_C_T	chr1	244251550	244251750	+	0.170118	0.044082227	mutated MAGGIE motif
chr1:246041416_C_T	chr1	246041316	246041516	+	-0.381877	3.07E-10	mutated MAGGIE motif
chr1:246041505_T_C	chr1	246041405	246041605	+	-0.381874	3.07E-10	mutated MAGGIE motif
chr1:24621486_C_T	chr1	24621386	24621586	+	0.102519	0.020941366	mutated MAGGIE motif
chr1:25054223_C_G	chr1	25054123	25054323	+	0.176117	0.002469327	mutated MAGGIE motif
chr1:25177039_T_A	chr1	25176939	25177139	+	0.193031	0.005873561	mutated MAGGIE motif
chr1:30181417_G_C	chr1	30181317	30181517	+	0.11132	0.028282437	mutated MAGGIE motif
chr1:32173360_G_A	chr1	32173260	32173460	+	-0.146799	1.93E-05	mutated MAGGIE motif
chr1:34229130_G_C	chr1	34229030	34229230	+	0.250128	0.001688395	mutated MAGGIE motif
chr1:34229201_A_C	chr1	34229101	34229301	+	-0.257852	0.001402816	mutated MAGGIE motif
chr1:3447914_G_C	chr1	3447814	3448014	+	0.162002	0.043893865	mutated MAGGIE motif
chr1:3547029_A_G	chr1	3546929	3547129	+	-0.183512	0.010909157	mutated MAGGIE motif
chr1:36911233_G_C	chr1	36911133	36911333	+	0.32144	0.000769331	mutated MAGGIE motif
chr1:39513382_C_G	chr1	39513282	39513482	+	-0.162916	0.01187595	mutated MAGGIE motif
chr1:40523278_G_A	chr1	40523178	40523378	+	0.157765	0.012823869	mutated MAGGIE motif
chr1:40523328_A_G	chr1	40523228	40523428	+	0.154181	0.012823869	mutated MAGGIE motif
chr1:41393632_A_G	chr1	41393532	41393732	+	0.239105	7.17E-06	mutated MAGGIE motif
chr1:44506420_A_C	chr1	44506320	44506520	+	0.157181	0.014105834	mutated MAGGIE motif
chr1:45138199_A_G	chr1	45138099	45138299	+	0.185801	9.95E-05	mutated MAGGIE motif
chr1:45738695_A_T	chr1	45738595	45738795	+	-0.195265	0.004656406	mutated MAGGIE motif
chr1:45738749_T_C	chr1	45738649	45738849	+	-0.10773	0.032946803	mutated MAGGIE motif
chr1:45854087_A_T	chr1	45853987	45854187	+	-0.146178	0.039684969	mutated MAGGIE motif
chr1:47656998_T_A	chr1	47656898	47657098	+	0.190781	0.009123323	mutated MAGGIE motif
chr1:53605884_T_C	chr1	53605784	53605984	+	0.136276	0.037667833	mutated MAGGIE motif
chr1:55433300_T_C	chr1	55433200	55433400	+	0.205907	0.010976885	mutated MAGGIE motif
chr1:55742322_T_C	chr1	55742222	55742422	+	0.170627	0.031797333	mutated MAGGIE motif
chr1:56162109_C_G	chr1	56162009	56162209	+	0.243957	0.000892315	mutated MAGGIE motif
chr1:56614762_C_T	chr1	56614662	56614862	+	-0.108507	0.033506168	mutated MAGGIE motif
chr1:56798183_A_G	chr1	56798083	56798283	+	-0.170165	0.007325944	mutated MAGGIE motif
chr1:56869073_C_G	chr1	56868973	56869173	+	-0.164338	0.00183309	mutated MAGGIE motif
chr1:56869202_A_G	chr1	56869102	56869302	+	-0.164081	0.00183309	mutated MAGGIE motif
chr1:56869251_C_T	chr1	56869151	56869351	+	-0.19847	0.00183309	mutated MAGGIE motif
chr1:56914701_G_T	chr1	56914601	56914801	+	-0.061746	0.001852658	mutated MAGGIE motif
chr1:56914738_T_C	chr1	56914638	56914838	+	0.050966	0.002568504	mutated MAGGIE motif
chr1:56956515_T_C	chr1	56956415	56956615	+	0.136709	0.025120813	mutated MAGGIE motif
chr1:56962821_A_G	chr1	56962721	56962921	+	0.144495	0.027326409	mutated MAGGIE motif
chr1:58829583_A_T	chr1	58829483	58829683	+	0.235879	0.00789704	mutated MAGGIE motif
chr1:59306065_G_A	chr1	59305965	59306165	+	-0.253439	9.23E-07	mutated MAGGIE motif
chr1:60567437_A_G	chr1	60567337	60567537	+	-0.144688	0.020217967	mutated MAGGIE motif
chr1:60679536_T_C	chr1	60679436	60679636	+	0.108405	0.04805886	mutated MAGGIE motif
chr1:60679758_T_G	chr1	60679658	60679858	+	0.109686	0.04805886	mutated MAGGIE motif
chr1:60747523_T_C	chr1	60747423	60747623	+	0.185228	0.005305184	mutated MAGGIE motif
chr1:62102307_A_G	chr1	62102207	62102407	+	0.149077	0.000627407	mutated MAGGIE motif
chr1:64637880_G_T	chr1	64637780	64637980	+	-0.137136	0.007626676	mutated MAGGIE motif
chr1:64786169_C_T	chr1	64786069	64786269	+	0.213421	7.90E-05	mutated MAGGIE motif
chr1:64786472_C_T	chr1	64786372	64786572	+	-0.142957	0.022719727	mutated MAGGIE motif
chr1:6551692_C_T	chr1	6551592	6551792	+	-0.137599	0.032005966	mutated MAGGIE motif
chr1:65942266_T_C	chr1	65942166	65942366	+	-0.174003	0.000474656	mutated MAGGIE motif
chr1:66930643_C_T	chr1	66930543	66930743	+	-0.105929	0.039205429	mutated MAGGIE motif
chr1:67931226_C_T	chr1	67931126	67931326	+	-0.168848	0.023049433	mutated MAGGIE motif
chr1:68259402_T_C	chr1	68259302	68259502	+	-0.160622	0.005942058	mutated MAGGIE motif
chr1:68316422_C_T	chr1	68316322	68316522	+	0.08627	0.011809786	mutated MAGGIE motif
chr1:68316499_A_G	chr1	68316399	68316599	+	-0.111338	0.006453423	mutated MAGGIE motif
chr1:68316501_C_A	chr1	68316401	68316601	+	-0.111333	0.006453423	mutated MAGGIE motif
chr1:68645003_G_A	chr1	68644903	68645103	+	0.154908	0.047119342	mutated MAGGIE motif
chr1:69090101_C_G	chr1	69090001	69090201	+	-0.1893	0.004888588	mutated MAGGIE motif
chr1:6972224_A_G	chr1	6972124	6972324	+	-0.182338	0.00520472	mutated MAGGIE motif
chr1:75811811_T_C	chr1	75811711	75811911	+	-0.081184	0.016293101	mutated MAGGIE motif
chr1:76049126_T_C	chr1	76049026	76049226	+	-0.153208	0.049082426	mutated MAGGIE motif
chr1:76049233_A_G	chr1	76049133	76049333	+	-0.156753	0.049082426	mutated MAGGIE motif
chr1:79338605_C_A	chr1	79338505	79338705	+	0.21578	0.005377025	mutated MAGGIE motif
[truncated: 3,792 more rows]
