# Supplementary material for: Systematic analysis of naturally occurring insertions and deletions that alter transcription factor spacing identifies tolerant and sensitive transcription factor pairs
Source: eLife. 2022 Jan 20;11:e70878. doi: 10.7554/eLife.70878 (PMC8809895; doi:10.7554/eLife.70878)
Supplement: Figure 4—source data 2. [file elife-70878-fig4-data2.csv]

VariantID	Chrom	Start	End	Strand	Effect size beta	Qvalue	group
chr10:14629401_G_T	chr10	14629301	14629501	+	0.03496499999999991	0.018869513783017	mutated ERG and p65 motif
chr11:123066082_T_A	chr11	123065982	123066182	+	0.131641	0.000217579554905484	mutated ERG and p65 motif
chr11:92818743_T_C	chr11	92818643	92818843	+	0.289945	3.622656896064461e-05	mutated ERG and p65 motif
chr12:42538119_G_A	chr12	42538019	42538219	+	-0.121516	0.0433147453002238	mutated ERG and p65 motif
chr13:44875052_G_A	chr13	44874952	44875152	+	-0.10792600000000002	0.00101535977737942	mutated ERG and p65 motif
chr13:77361753_A_G	chr13	77361653	77361853	+	-0.15708699999999998	0.0018265101960572602	mutated ERG and p65 motif
chr13:95924328_C_T	chr13	95924228	95924428	+	-0.202002	3.14421877743005e-05	mutated ERG and p65 motif
chr15:71081050_T_C	chr15	71080950	71081150	+	0.195522	0.00405715556373156	mutated ERG and p65 motif
chr16:16099878_G_A	chr16	16099778	16099978	+	-0.12135	0.0018190772484965	mutated ERG and p65 motif
chr16:3152233_C_T	chr16	3152133	3152333	+	-0.15324499999999994	0.00326083769453621	mutated ERG and p65 motif
chr16:59364193_C_T	chr16	59364093	59364293	+	0.204441	0.0481664283958391	mutated ERG and p65 motif
chr16:9937980_T_C	chr16	9937880	9938080	+	-0.103983	0.005757674626457821	mutated ERG and p65 motif
chr17:2918626_C_T	chr17	2918526	2918726	+	-0.14663800000000002	0.00674656926203556	mutated ERG and p65 motif
chr19:8373919_ACACAG_A	chr19	8373819	8374019	+	0.163146	0.000310275361584693	mutated ERG and p65 motif
chr1:154589682_C_G	chr1	154589582	154589782	+	-0.24727600000000002	1.9624536567735105e-05	mutated ERG and p65 motif
chr1:210001713_C_A	chr1	210001613	210001813	+	0.040356000000000065	0.0315194428480957	mutated ERG and p65 motif
chr1:212965095_G_A	chr1	212964995	212965195	+	0.13974200000000006	0.0192520370414198	mutated ERG and p65 motif
chr21:20145459_T_C	chr21	20145359	20145559	+	0.35674300000000003	3.717586079857e-12	mutated ERG and p65 motif
chr21:27500333_C_T	chr21	27500233	27500433	+	-0.17127199999999998	0.0372628101736584	mutated ERG and p65 motif
chr21:38172143_A_G	chr21	38172043	38172243	+	0.152366	0.00298526579179219	mutated ERG and p65 motif
chr2:127867107_T_C	chr2	127867007	127867207	+	0.20902600000000005	0.0197853670395416	mutated ERG and p65 motif
chr2:1712139_G_A	chr2	1712039	1712239	+	0.14125	0.0257713262209295	mutated ERG and p65 motif
chr2:20817493_C_T	chr2	20817393	20817593	+	-0.06067400000000001	0.00810888678295419	mutated ERG and p65 motif
chr3:147031426_ATAATGGAAACTAC_A	chr3	147031326	147031526	+	0.20218400000000006	0.00779533900847765	mutated ERG and p65 motif
chr4:147878581_C_G	chr4	147878481	147878681	+	-0.270486	0.000337546425483907	mutated ERG and p65 motif
chr4:3307638_C_G	chr4	3307538	3307738	+	-0.156132	0.0030952051192066	mutated ERG and p65 motif
chr4:5761949_G_A	chr4	5761849	5762049	+	0.130919	9.58108954925125e-11	mutated ERG and p65 motif
chr4:58021332_T_A	chr4	58021232	58021432	+	0.16671999999999998	0.0153314612227149	mutated ERG and p65 motif
chr5:169403604_A_G	chr5	169403504	169403704	+	0.06253599999999992	0.000576716474689615	mutated ERG and p65 motif
chr6:134768224_C_A	chr6	134768124	134768324	+	-0.13463200000000006	0.0442758960349115	mutated ERG and p65 motif
chr7:110214134_T_C	chr7	110214034	110214234	+	0.21351600000000004	0.0447448169157114	mutated ERG and p65 motif
chr8:13228783_C_T	chr8	13228683	13228883	+	-0.08271699999999997	1.73569721890956e-06	mutated ERG and p65 motif
chr8:39799765_C_T	chr8	39799665	39799865	+	0.105387	0.000294694049697701	mutated ERG and p65 motif
chr8:40246554_A_G	chr8	40246454	40246654	+	0.213333	0.0149364038589488	mutated ERG and p65 motif
chr10:104387019_T_C	chr10	104386919	104387119	+	0.09980500000000003	0.009108813147061473	mutated p65 motif
chr10:104391627_A_G	chr10	104391527	104391727	+	0.11527299999999994	0.0006910946487907768	mutated p65 motif
chr10:104393506_A_G	chr10	104393406	104393606	+	0.09415399999999996	0.00871049951484917	mutated p65 motif
chr10:105814459_A_C	chr10	105814359	105814559	+	0.07470699999999998	0.0252369142748277	mutated p65 motif
chr10:120958293_G_A	chr10	120958193	120958393	+	-0.20879299999999998	7.04504189033749e-12	mutated p65 motif
chr10:126850489_A_G	chr10	126850389	126850589	+	0.16102799999999995	0.000113975760578425	mutated p65 motif
chr10:134406107_T_C	chr10	134406007	134406207	+	0.17283900000000008	0.0322588781956593	mutated p65 motif
chr10:14613741_A_G	chr10	14613641	14613841	+	0.03197799999999995	0.0433069613245247	mutated p65 motif
chr10:14619494_A_G	chr10	14619394	14619594	+	0.07100099999999998	7.26222184288571e-08	mutated p65 motif
chr10:15243762_C_T	chr10	15243662	15243862	+	0.05686899999999995	0.0169996896000167	mutated p65 motif
chr10:17250261_C_G	chr10	17250161	17250361	+	-0.157343	0.0326579716278194	mutated p65 motif
chr10:27672220_A_C	chr10	27672120	27672320	+	-0.12569799999999998	0.013006030262747	mutated p65 motif
chr10:27672902_TA_T	chr10	27672802	27673002	+	-0.12567699999999998	0.013006030262747	mutated p65 motif
chr10:28297248_C_T	chr10	28297148	28297348	+	-0.183307	0.0444739291322266	mutated p65 motif
chr10:29844275_G_A	chr10	29844175	29844375	+	0.15837900000000005	0.00306586765404554	mutated p65 motif
chr10:29846215_CG_C	chr10	29846115	29846315	+	0.15858899999999998	0.00306586765404554	mutated p65 motif
chr10:3919071_G_A	chr10	3918971	3919171	+	0.171806	5.49097625039228e-10	mutated p65 motif
chr10:3965517_G_A	chr10	3965417	3965617	+	-0.19310500000000005	4.8951535804584697e-26	mutated p65 motif
chr10:3966574_G_T	chr10	3966474	3966674	+	-0.20407800000000004	1.1888694320144899e-27	mutated p65 motif
chr10:3968292_A_G	chr10	3968192	3968392	+	-0.20410500000000004	1.1888694320144899e-27	mutated p65 motif
chr10:3969492_G_A	chr10	3969392	3969592	+	0.15545499999999998	6.34405800836543e-10	mutated p65 motif
chr10:3973093_A_G	chr10	3972993	3973193	+	0.12773500000000004	6.35225867201146e-05	mutated p65 motif
chr10:4909030_G_A	chr10	4908930	4909130	+	0.10839500000000002	0.00400843967713043	mutated p65 motif
chr10:4910989_G_A	chr10	4910889	4911089	+	0.108217	0.00400843967713043	mutated p65 motif
chr10:60276906_C_T	chr10	60276806	60277006	+	-0.13897400000000001	0.00343773144923838	mutated p65 motif
chr10:61296617_C_G	chr10	61296517	61296717	+	0.14193500000000006	0.0325894427360628	mutated p65 motif
chr10:71575904_G_A	chr10	71575804	71576004	+	0.11270400000000005	0.0005287815190242	mutated p65 motif
chr10:75489843_C_A	chr10	75489743	75489943	+	0.09122200000000004	0.0236307156975809	mutated p65 motif
chr10:75489844_C_A	chr10	75489744	75489944	+	0.09122200000000004	0.0236307156975809	mutated p65 motif
chr10:90039357_A_AAGGAAATGAATCTC	chr10	90039257	90039457	+	0.194842	0.0148898503085053	mutated p65 motif
chr10:91349049_G_T	chr10	91348949	91349149	+	0.265726	0.00188384763987072	mutated p65 motif
chr10:93364279_C_A	chr10	93364179	93364379	+	0.11083299999999996	0.0008870868479614929	mutated p65 motif
chr11:103463224_C_T	chr11	103463124	103463324	+	0.2504970000000001	8.88893399608004e-14	mutated p65 motif
chr11:103490917_G_T	chr11	103490817	103491017	+	-0.04435600000000006	0.0159049225161315	mutated p65 motif
chr11:103508911_A_G	chr11	103508811	103509011	+	0.04998199999999997	0.000128576966058302	mutated p65 motif
chr11:103673277_A_C	chr11	103673177	103673377	+	-0.146856	4.8780658348753e-06	mutated p65 motif
chr11:108742650_T_C	chr11	108742550	108742750	+	0.31808800000000004	2.824006645694689e-20	mutated p65 motif
chr11:12157802_T_C	chr11	12157702	12157902	+	0.09277899999999993	0.023174414503484	mutated p65 motif
chr11:12225617_T_A	chr11	12225517	12225717	+	-0.032360999999999966	0.0119897723080136	mutated p65 motif
chr11:12246879_A_T	chr11	12246779	12246979	+	0.08561000000000007	2.52542033186477e-05	mutated p65 motif
chr11:12306459_A_C	chr11	12306359	12306559	+	0.06613199999999997	0.00435610626092486	mutated p65 motif
chr11:128529209_A_AT	chr11	128529109	128529309	+	-0.205262	0.0157399708926878	mutated p65 motif
chr11:13130170_G_A	chr11	13130070	13130270	+	-0.08709799999999995	0.00991349323814445	mutated p65 motif
chr11:20383324_T_C	chr11	20383224	20383424	+	-0.10641100000000003	0.0131935948318213	mutated p65 motif
chr11:20384650_G_A	chr11	20384550	20384750	+	0.12473199999999995	0.00407397798006633	mutated p65 motif
chr11:23495582_A_G	chr11	23495482	23495682	+	-0.15889399999999998	0.0119414142344798	mutated p65 motif
chr11:23592851_A_T	chr11	23592751	23592951	+	-0.24892600000000004	1.03076362554546e-05	mutated p65 motif
chr11:29503442_T_G	chr11	29503342	29503542	+	-0.093038	0.0004501273045763649	mutated p65 motif
chr11:42336946_T_C	chr11	42336846	42337046	+	-0.15575900000000004	0.0144300707092846	mutated p65 motif
chr11:835065_C_T	chr11	834965	835165	+	-0.13793	0.009669922755487259	mutated p65 motif
chr11:840604_C_G	chr11	840504	840704	+	-0.149341	0.0008993404377993711	mutated p65 motif
chr11:843097_G_C	chr11	842997	843197	+	-0.09994999999999997	0.028131952704166	mutated p65 motif
chr11:86195013_A_T	chr11	86194913	86195113	+	0.042758999999999985	0.0410620772975715	mutated p65 motif
chr11:86198335_C_T	chr11	86198235	86198435	+	0.043731999999999986	0.0410620772975715	mutated p65 motif
chr11:86230474_C_G	chr11	86230374	86230574	+	0.07370100000000003	0.0274255673849418	mutated p65 motif
chr11:86231119_T_C	chr11	86231019	86231219	+	0.07648599999999994	0.0274255673849418	mutated p65 motif
chr12:117576655_C_A	chr12	117576555	117576755	+	-0.18242800000000006	0.0021192178591164	mutated p65 motif
chr12:122231368_C_A	chr12	122231268	122231468	+	0.13461999999999996	0.0231305218956931	mutated p65 motif
chr12:122245089_A_G	chr12	122244989	122245189	+	0.13311300000000004	0.0231305218956931	mutated p65 motif
chr12:125006162_A_G	chr12	125006062	125006262	+	0.09741199999999994	0.0283814166929463	mutated p65 motif
chr12:13046018_T_A	chr12	13045918	13046118	+	0.073496	0.0261459782820163	mutated p65 motif
chr12:20184707_T_G	chr12	20184607	20184807	+	0.07047399999999993	0.0360523198252861	mutated p65 motif
chr12:24762161_G_C	chr12	24762061	24762261	+	0.149868	0.000738011336130234	mutated p65 motif
chr12:24762452_G_A	chr12	24762352	24762552	+	0.14915799999999999	0.000738011336130234	mutated p65 motif
chr12:26799481_G_A	chr12	26799381	26799581	+	-0.15678800000000004	0.0017200719291206401	mutated p65 motif
chr12:28122102_C_G	chr12	28122002	28122202	+	0.105499	0.0367499977304735	mutated p65 motif
chr12:3186134_A_C	chr12	3186034	3186234	+	-0.06201000000000001	0.0350810705479528	mutated p65 motif
chr12:3231373_G_T	chr12	3231273	3231473	+	-0.06894899999999997	0.004765631545959471	mutated p65 motif
chr12:3325469_T_A	chr12	3325369	3325569	+	-0.107404	0.0169605327098454	mutated p65 motif
chr12:3325815_G_T	chr12	3325715	3325915	+	-0.10705900000000003	0.0169605327098454	mutated p65 motif
chr12:46382256_C_A	chr12	46382156	46382356	+	0.11770500000000005	0.00233126303677559	mutated p65 motif
chr12:46613494_C_G	chr12	46613394	46613594	+	0.114425	0.000372410874574755	mutated p65 motif
chr12:46825077_T_TG	chr12	46824977	46825177	+	0.116881	0.0403182111906332	mutated p65 motif
chr12:48195873_C_T	chr12	48195773	48195973	+	0.11793999999999992	0.0020896784825400697	mutated p65 motif
chr12:52583604_G_T	chr12	52583504	52583704	+	-0.09257900000000002	0.0168930325315989	mutated p65 motif
chr12:53264973_A_T	chr12	53264873	53265073	+	-0.09623200000000004	0.0458101044925396	mutated p65 motif
chr12:6285674_G_A	chr12	6285574	6285774	+	0.050786000000000005	0.00636356466260342	mutated p65 motif
chr12:65017086_G_A	chr12	65016986	65017186	+	0.12929999999999994	4.6026087747373294e-05	mutated p65 motif
chr12:70637343_G_T	chr12	70637243	70637443	+	0.144551	0.0258450130444429	mutated p65 motif
chr12:70993550_T_C	chr12	70993450	70993650	+	0.15885400000000005	7.68469031722938e-10	mutated p65 motif
chr12:75966233_A_G	chr12	75966133	75966333	+	0.125359	0.0367090604756384	mutated p65 motif
chr12:86126806_A_C	chr12	86126706	86126906	+	-0.16854200000000005	0.0144657040721022	mutated p65 motif
chr12:89624599_A_G	chr12	89624499	89624699	+	0.05155900000000002	0.0198624192678659	mutated p65 motif
chr12:89870785_C_T	chr12	89870685	89870885	+	0.2264649999999999	0.0029747332239945397	mutated p65 motif
chr12:93782998_C_T	chr12	93782898	93783098	+	0.15640200000000004	0.0456422061499477	mutated p65 motif
chr12:93924410_C_T	chr12	93924310	93924510	+	-0.203754	0.00323732779400982	mutated p65 motif
chr12:94984929_C_G	chr12	94984829	94985029	+	-0.147609	1.74607633548487e-05	mutated p65 motif
chr12:96868799_G_A	chr12	96868699	96868899	+	-0.320024	1.96775384190768e-22	mutated p65 motif
chr12:9800058_G_A	chr12	9799958	9800158	+	-0.11090100000000004	0.0095553745867797	mutated p65 motif
chr12:9801373_A_G	chr12	9801273	9801473	+	0.127923	0.00218536367811668	mutated p65 motif
chr12:98793961_G_A	chr12	98793861	98794061	+	-0.09517800000000004	0.0221480101108026	mutated p65 motif
chr13:21101430_C_A	chr13	21101330	21101530	+	0.12614099999999995	0.0347956811311686	mutated p65 motif
chr13:33801572_A_G	chr13	33801472	33801672	+	-0.09337199999999997	0.0426474191847359	mutated p65 motif
chr13:37109201_G_A	chr13	37109101	37109301	+	0.096557	0.0011251013230769	mutated p65 motif
chr13:37110168_C_T	chr13	37110068	37110268	+	0.09654399999999996	0.0011251013230769	mutated p65 motif
chr13:95844494_G_T	chr13	95844394	95844594	+	-0.161117	0.0338131826924599	mutated p65 motif
chr13:95919523_T_G	chr13	95919423	95919623	+	-0.131369	0.0128738696466278	mutated p65 motif
chr13:95934705_G_A	chr13	95934605	95934805	+	0.22683899999999999	1.9968288449677107e-06	mutated p65 motif
chr13:99739742_T_G	chr13	99739642	99739842	+	0.12798800000000002	0.0187338108945431	mutated p65 motif
chr14:22137771_C_T	chr14	22137671	22137871	+	0.280149	0.000385130809781029	mutated p65 motif
chr14:32884095_A_C	chr14	32883995	32884195	+	0.107483	0.00560761558255682	mutated p65 motif
chr14:54831541_A_C	chr14	54831441	54831641	+	-0.17496199999999998	0.00671842694215701	mutated p65 motif
chr14:55914523_G_A	chr14	55914423	55914623	+	0.13915100000000002	0.00856160633148397	mutated p65 motif
chr14:56257851_G_A	chr14	56257751	56257951	+	-0.12081099999999999	0.0004969807441153258	mutated p65 motif
chr14:65710399_G_A	chr14	65710299	65710499	+	-0.06416899999999998	0.000811646912616256	mutated p65 motif
chr14:74208910_A_G	chr14	74208810	74209010	+	0.07980100000000001	0.0311810202357486	mutated p65 motif
chr14:74530030_T_C	chr14	74529930	74530130	+	0.13692499999999996	0.0379494894386803	mutated p65 motif
chr14:95503828_C_T	chr14	95503728	95503928	+	0.1868	0.0108667582342503	mutated p65 motif
chr14:95715157_G_T	chr14	95715057	95715257	+	-0.16005599999999998	0.00580307710851004	mutated p65 motif
chr14:95721427_C_G	chr14	95721327	95721527	+	-0.159063	0.00580307710851004	mutated p65 motif
chr14:96014135_A_G	chr14	96014035	96014235	+	0.13535299999999995	0.0335238844761337	mutated p65 motif
chr15:23085734_C_A	chr15	23085634	23085834	+	0.12793100000000002	0.031952833927726	mutated p65 motif
chr15:25104146_C_G	chr15	25104046	25104246	+	-0.27576500000000004	0.00017541434316969599	mutated p65 motif
chr15:39182799_A_G	chr15	39182699	39182899	+	-0.060534000000000025	0.00918012976330864	mutated p65 motif
chr15:39370742_C_G	chr15	39370642	39370842	+	0.14347000000000001	0.0340740547429701	mutated p65 motif
chr15:42225008_C_T	chr15	42224908	42225108	+	0.030776000000000026	0.0473315792677155	mutated p65 motif
chr15:48678848_A_C	chr15	48678748	48678948	+	-0.116639	0.0430492698925387	mutated p65 motif
chr15:57672835_A_T	chr15	57672735	57672935	+	-0.07016899999999998	0.0012643091357191	mutated p65 motif
chr15:65164845_G_C	chr15	65164745	65164945	+	0.14948899999999998	0.0155955632581274	mutated p65 motif
chr15:71081590_C_T	chr15	71081490	71081690	+	0.19551300000000005	0.00405715556373156	mutated p65 motif
chr15:79973673_C_G	chr15	79973573	79973773	+	-0.07700100000000004	0.0294936906799232	mutated p65 motif
chr15:90356002_C_T	chr15	90355902	90356102	+	0.12532299999999996	0.0465125510402371	mutated p65 motif
chr16:29302751_A_T	chr16	29302651	29302851	+	0.176477	0.000215530502521168	mutated p65 motif
chr16:29302798_T_G	chr16	29302698	29302898	+	0.17835500000000004	0.000208165616288819	mutated p65 motif
chr16:50739582_C_G	chr16	50739482	50739682	+	0.205583	0.0010625589822132	mutated p65 motif
chr16:77340831_G_C	chr16	77340731	77340931	+	-0.07646599999999998	1.26882396407116e-09	mutated p65 motif
chr16:77344049_T_C	chr16	77343949	77344149	+	0.06303800000000004	9.03024441702352e-09	mutated p65 motif
chr16:77345598_T_G	chr16	77345498	77345698	+	-0.07694200000000001	3.817208699302249e-09	mutated p65 motif
chr16:77345602_C_T	chr16	77345502	77345702	+	-0.07875900000000002	9.082947030546199e-10	mutated p65 motif
chr16:84540668_G_A	chr16	84540568	84540768	+	-0.212229	0.0009576751740760553	mutated p65 motif
chr16:9142859_CCT_C	chr16	9142759	9142959	+	0.156605	0.0214457466682016	mutated p65 motif
chr17:32739642_T_C	chr17	32739542	32739742	+	-0.13654899999999998	2.98421397548453e-07	mutated p65 motif
chr17:44026548_T_C	chr17	44026448	44026648	+	-0.196469	0.0014098109434761302	mutated p65 motif
chr17:44340021_C_T	chr17	44339921	44340121	+	0.16897799999999996	0.0321762165115332	mutated p65 motif
chr17:45332890_G_C	chr17	45332790	45332990	+	0.173111	0.000393415761350711	mutated p65 motif
chr17:5729774_C_G	chr17	5729674	5729874	+	0.16048900000000002	1.80372878595457e-11	mutated p65 motif
chr17:6159834_G_A	chr17	6159734	6159934	+	0.07306499999999994	0.0180204433353238	mutated p65 motif
chr17:62258959_A_G	chr17	62258859	62259059	+	-0.143808	0.0465218515031953	mutated p65 motif
chr17:66509380_G_A	chr17	66509280	66509480	+	-0.094864	0.0004733455016096369	mutated p65 motif
chr17:67878582_T_C	chr17	67878482	67878682	+	0.05967400000000001	0.00797559575241856	mutated p65 motif
chr17:71228937_C_T	chr17	71228837	71229037	+	0.16449799999999992	1.13997965464656e-05	mutated p65 motif
chr17:77908321_G_A	chr17	77908221	77908421	+	0.21971800000000008	7.7011067753872e-06	mutated p65 motif
chr17:79455936_TTCACCCCTGTGCGGTAACG_T	chr17	79455836	79456036	+	-0.135785	0.00291789494679533	mutated p65 motif
chr17:79479469_A_C	chr17	79479369	79479569	+	0.09218900000000008	0.0062917444718227	mutated p65 motif
chr18:37949702_C_T	chr18	37949602	37949802	+	-0.054727000000000026	0.0011429561704699599	mutated p65 motif
chr18:5456774_A_G	chr18	5456674	5456874	+	-0.08837499999999998	0.00015769990416278102	mutated p65 motif
chr18:55338192_T_G	chr18	55338092	55338292	+	-0.103958	0.018141896623105	mutated p65 motif
chr18:57181281_C_T	chr18	57181181	57181381	+	0.23322200000000004	2.5855157275168e-14	mutated p65 motif
chr18:9620202_C_T	chr18	9620102	9620302	+	0.09713200000000001	0.00123224143027401	mutated p65 motif
chr19:28915760_G_A	chr19	28915660	28915860	+	0.202125	0.0152182316713543	mutated p65 motif
chr19:28915761_G_C	chr19	28915661	28915861	+	0.202125	0.0152182316713543	mutated p65 motif
chr19:28916579_T_G	chr19	28916479	28916679	+	0.20209999999999995	0.0152182316713543	mutated p65 motif
chr19:39175617_C_T	chr19	39175517	39175717	+	-0.07651099999999994	0.00617700860442609	mutated p65 motif
chr19:43708752_G_A	chr19	43708652	43708852	+	-0.200889	0.0359188808760168	mutated p65 motif
chr19:48707665_G_A	chr19	48707565	48707765	+	0.080762	0.00219024806538363	mutated p65 motif
chr19:48759727_T_C	chr19	48759627	48759827	+	-0.05737600000000004	0.0298013922051878	mutated p65 motif
chr19:53237778_A_G	chr19	53237678	53237878	+	0.104024	0.0135000809423658	mutated p65 motif
chr1:112057895_C_G	chr1	112057795	112057995	+	0.11531400000000006	0.000654831940679523	mutated p65 motif
chr1:154470356_T_C	chr1	154470256	154470456	+	-0.08398199999999995	0.0146055329355728	mutated p65 motif
chr1:162828060_A_C	chr1	162827960	162828160	+	-0.16897600000000002	1.8447941378178799e-06	mutated p65 motif
chr1:162848254_G_A	chr1	162848154	162848354	+	0.15576499999999993	0.0007162974846616331	mutated p65 motif
chr1:172863647_T_C	chr1	172863547	172863747	+	0.05889	0.0375029755103498	mutated p65 motif
chr1:175161599_G_T	chr1	175161499	175161699	+	0.05797799999999996	0.0206780392763482	mutated p65 motif
chr1:177753776_C_T	chr1	177753676	177753876	+	0.18367600000000006	0.00530526653854239	mutated p65 motif
chr1:183155715_CT_C	chr1	183155615	183155815	+	0.183603	0.00745945071860827	mutated p65 motif
chr1:184228871_T_C	chr1	184228771	184228971	+	-0.189518	1.59638281031832e-07	mutated p65 motif
chr1:186506150_C_A	chr1	186506050	186506250	+	0.13925299999999996	0.0018009352107065	mutated p65 motif
chr1:186601742_G_GC	chr1	186601642	186601842	+	0.14865799999999996	0.0350012940853578	mutated p65 motif
chr1:201745169_A_G	chr1	201745069	201745269	+	0.20285699999999995	4.45714251636995e-06	mutated p65 motif
chr1:209979014_G_C	chr1	209978914	209979114	+	-0.138803	0.0350410006964638	mutated p65 motif
chr1:210001048_A_C	chr1	210000948	210001148	+	0.040356000000000065	0.0315194428480957	mutated p65 motif
chr1:21652177_C_T	chr1	21652077	21652277	+	0.07501499999999994	0.00406245004591774	mutated p65 motif
chr1:22258599_G_C	chr1	22258499	22258699	+	-0.07657399999999998	0.00213877913273122	mutated p65 motif
chr1:223914453_C_T	chr1	223914353	223914553	+	-0.07316699999999997	0.000700950481164966	mutated p65 motif
chr1:224230307_T_C	chr1	224230207	224230407	+	-0.14802300000000002	0.029854851258451	mutated p65 motif
chr1:224614625_C_T	chr1	224614525	224614725	+	-0.10285900000000003	0.0375855839699963	mutated p65 motif
chr1:243418063_C_A	chr1	243417963	243418163	+	-0.05941499999999994	0.014994382299417	mutated p65 motif
chr1:26606029_G_GA	chr1	26605929	26606129	+	0.10420600000000002	0.0125970730435057	mutated p65 motif
chr1:39492764_G_A	chr1	39492664	39492864	+	-0.08614700000000003	0.0344869229622033	mutated p65 motif
chr1:39492765_A_T	chr1	39492665	39492865	+	-0.08610699999999999	0.0344869229622033	mutated p65 motif
chr1:56917433_G_T	chr1	56917333	56917533	+	-0.08764499999999997	9.81151712488877e-05	mutated p65 motif
chr1:56917952_C_A	chr1	56917852	56918052	+	0.03942200000000007	0.0300347917390392	mutated p65 motif
chr1:59277926_C_T	chr1	59277826	59278026	+	0.06082399999999999	0.00756558406505055	mutated p65 motif
chr1:66954924_C_A	chr1	66954824	66955024	+	-0.18973399999999999	1.9676334576689897e-06	mutated p65 motif
chr1:66957459_T_A	chr1	66957359	66957559	+	0.19426899999999991	2.16824113438227e-09	mutated p65 motif
chr20:1397780_G_A	chr20	1397680	1397880	+	-0.09352899999999996	7.3659223058652e-08	mutated p65 motif
chr20:1417397_C_T	chr20	1417297	1417497	+	-0.13216999999999995	0.0117495931697508	mutated p65 motif
chr20:2199055_G_GACACACACTTCTAAA	chr20	2198955	2199155	+	0.283575	6.04456352451119e-06	mutated p65 motif
chr20:43272585_T_C	chr20	43272485	43272685	+	0.07361600000000001	0.024151626739629	mutated p65 motif
chr20:48199956_G_A	chr20	48199856	48200056	+	0.16185699999999992	1.1376494822344999e-07	mutated p65 motif
chr20:48206586_G_A	chr20	48206486	48206686	+	0.16489700000000007	1.63176146839398e-07	mutated p65 motif
chr20:48429706_A_C	chr20	48429606	48429806	+	-0.06275799999999998	0.0005611018771171348	mutated p65 motif
chr20:56325452_A_G	chr20	56325352	56325552	+	-0.16209800000000002	0.0035303314554150297	mutated p65 motif
chr20:6657554_T_C	chr20	6657454	6657654	+	0.06647599999999998	9.17439583700563e-05	mutated p65 motif
chr20:6690400_T_TG	chr20	6690300	6690500	+	0.13670400000000005	1.4337010278655499e-05	mutated p65 motif
chr20:6693128_C_T	chr20	6693028	6693228	+	0.15116000000000007	3.96201466406052e-06	mutated p65 motif
chr20:7476840_C_G	chr20	7476740	7476940	+	-0.10624699999999998	0.0051464711528666105	mutated p65 motif
chr21:16084376_C_T	chr21	16084276	16084476	+	0.17069100000000004	0.0372205680305096	mutated p65 motif
chr21:20144540_G_C	chr21	20144440	20144640	+	0.35821499999999995	3.717586079857e-12	mutated p65 motif
chr21:25417796_G_T	chr21	25417696	25417896	+	-0.229244	0.0036643720710890703	mutated p65 motif
chr21:37823563_A_G	chr21	37823463	37823663	+	0.07697500000000003	0.00647674541743166	mutated p65 motif
chr21:38349851_A_G	chr21	38349751	38349951	+	0.14818499999999998	0.0252943906222207	mutated p65 motif
chr21:38445457_T_G	chr21	38445357	38445557	+	0.108703	0.0388022083322646	mutated p65 motif
chr21:40227628_T_G	chr21	40227528	40227728	+	-0.25569600000000003	4.30119959561092e-07	mutated p65 motif
chr21:42579521_T_C	chr21	42579421	42579621	+	0.096464	0.0121319303125641	mutated p65 motif
chr21:42580265_G_A	chr21	42580165	42580365	+	0.114823	0.00355382061346975	mutated p65 motif
chr22:25382031_C_T	chr22	25381931	25382131	+	-0.11932700000000003	0.0238961090827168	mutated p65 motif
chr22:27901554_G_C	chr22	27901454	27901654	+	0.10645499999999997	0.0048146989105388605	mutated p65 motif
chr22:37581485_C_A	chr22	37581385	37581585	+	-0.07207399999999997	0.0355138270438581	mutated p65 motif
chr22:37586961_T_A	chr22	37586861	37587061	+	-0.07572499999999999	0.0355138270438581	mutated p65 motif
chr22:43073936_C_T	chr22	43073836	43074036	+	0.11359600000000004	0.0129904182770966	mutated p65 motif
chr22:43077573_A_C	chr22	43077473	43077673	+	-0.091424	0.00735087030250772	mutated p65 motif
chr22:50356693_T_C	chr22	50356593	50356793	+	0.12960000000000005	0.0222501899291341	mutated p65 motif
chr2:124939926_T_A	chr2	124939826	124940026	+	0.17405800000000005	7.23257034083675e-05	mutated p65 motif
chr2:160106397_C_G	chr2	160106297	160106497	+	0.11859399999999998	0.0337840831179778	mutated p65 motif
chr2:160896471_G_T	chr2	160896371	160896571	+	0.11553800000000004	8.949425852734659e-05	mutated p65 motif
chr2:1613845_T_C	chr2	1613745	1613945	+	0.163709	0.00783596650092281	mutated p65 motif
chr2:20818286_A_C	chr2	20818186	20818386	+	0.05580099999999999	0.00940676895278491	mutated p65 motif
chr2:224685361_T_C	chr2	224685261	224685461	+	-0.242691	7.1300560172873e-09	mutated p65 motif
chr2:228731484_GGGTTTTTCC_G	chr2	228731384	228731584	+	-0.055311999999999965	0.0161369798572468	mutated p65 motif
chr2:228740927_G_A	chr2	228740827	228741027	+	-0.05613299999999999	0.0161369798572468	mutated p65 motif
chr2:235885392_G_GAAAAACATAAGAC	chr2	235885292	235885492	+	0.125046	0.00196929967169449	mutated p65 motif
chr2:237758671_C_G	chr2	237758571	237758771	+	0.14873800000000004	4.15234401855817e-05	mutated p65 motif
chr2:237855744_T_A	chr2	237855644	237855844	+	-0.10055599999999998	0.0009480817171437461	mutated p65 motif
chr2:34329775_C_A	chr2	34329675	34329875	+	0.11645000000000005	0.00596256781767386	mutated p65 motif
chr2:38055650_G_A	chr2	38055550	38055750	+	0.08002600000000004	0.00122656426273387	mutated p65 motif
chr2:65216648_G_C	chr2	65216548	65216748	+	-0.15006999999999998	0.000307857746328849	mutated p65 motif
chr2:65308573_A_AAGC	chr2	65308473	65308673	+	0.271189	3.746984290613071e-11	mutated p65 motif
chr2:73060581_C_T	chr2	73060481	73060681	+	-0.201924	0.0030290056386838	mutated p65 motif
chr2:74347308_A_C	chr2	74347208	74347408	+	0.138351	0.00846218452008261	mutated p65 motif
chr2:75823162_G_A	chr2	75823062	75823262	+	-0.267984	3.09877824188086e-07	mutated p65 motif
chr2:9794655_G_A	chr2	9794555	9794755	+	0.18447499999999994	0.0211458303499149	mutated p65 motif
chr3:10027641_C_T	chr3	10027541	10027741	+	0.13118799999999994	0.0301001093960749	mutated p65 motif
chr3:104078453_G_T	chr3	104078353	104078553	+	-0.173483	0.0200413013300804	mutated p65 motif
chr3:107676074_A_G	chr3	107675974	107676174	+	0.11731199999999994	0.00133118164433224	mutated p65 motif
chr3:112051427_G_T	chr3	112051327	112051527	+	-0.08310699999999999	0.0215896996256342	mutated p65 motif
chr3:150123996_G_A	chr3	150123896	150124096	+	0.13369300000000006	0.009367437632834	mutated p65 motif
chr3:152033755_T_C	chr3	152033655	152033855	+	0.11757299999999993	0.00851142998319595	mutated p65 motif
chr3:171395025_G_A	chr3	171394925	171395125	+	-0.152437	0.0497557685230709	mutated p65 motif
chr3:171521613_A_G	chr3	171521513	171521713	+	-0.07041800000000004	3.53014161520393e-11	mutated p65 motif
chr3:171526153_C_T	chr3	171526053	171526253	+	0.038636	4.1146606084232e-05	mutated p65 motif
chr3:194877800_T_C	chr3	194877700	194877900	+	0.060772999999999966	0.0242558271428941	mutated p65 motif
chr3:29552615_T_C	chr3	29552515	29552715	+	0.12727500000000005	0.0126279139578238	mutated p65 motif
chr3:29555976_C_A	chr3	29555876	29556076	+	0.1155520000000001	0.0204482553021758	mutated p65 motif
chr3:64913058_A_G	chr3	64912958	64913158	+	0.08545100000000005	2.56445872569618e-06	mutated p65 motif
chr3:98497659_C_A	chr3	98497559	98497759	+	-0.229299	9.53171377126229e-13	mutated p65 motif
chr3:98505529_T_G	chr3	98505429	98505629	+	0.17743599999999993	1.64575797132524e-24	mutated p65 motif
chr4:101505834_C_A	chr4	101505734	101505934	+	-0.301277	2.31164485821079e-09	mutated p65 motif
chr4:10174190_C_G	chr4	10174090	10174290	+	-0.118653	0.0299005322339482	mutated p65 motif
chr4:113193540_A_T	chr4	113193440	113193640	+	-0.14740699999999998	0.00384536296267339	mutated p65 motif
chr4:140925529_T_A	chr4	140925429	140925629	+	0.10310899999999999	0.044483699018102986	mutated p65 motif
chr4:16419601_C_A	chr4	16419501	16419701	+	-0.15106999999999998	1.2131913412020698e-09	mutated p65 motif
chr4:169306322_T_A	chr4	169306222	169306422	+	0.16030100000000005	1.0185940362411901e-05	mutated p65 motif
chr4:175602793_C_T	chr4	175602693	175602893	+	-0.10728000000000004	0.0125235521360932	mutated p65 motif
chr4:177699407_C_T	chr4	177699307	177699507	+	-0.145579	0.00999368159429063	mutated p65 motif
chr4:177700010_T_A	chr4	177699910	177700110	+	-0.145575	0.00999368159429063	mutated p65 motif
chr4:177804404_G_T	chr4	177804304	177804504	+	0.2430899999999999	2.06459205334559e-09	mutated p65 motif
chr4:186797287_G_A	chr4	186797187	186797387	+	0.202589	7.16250074420617e-08	mutated p65 motif
chr4:2418445_C_G	chr4	2418345	2418545	+	0.08092200000000005	0.0144573523587537	mutated p65 motif
chr4:29310699_A_T	chr4	29310599	29310799	+	0.09808000000000006	0.0352862075686391	mutated p65 motif
chr4:30762002_C_A	chr4	30761902	30762102	+	0.11431199999999996	0.000131355064615714	mutated p65 motif
chr4:37551527_G_A	chr4	37551427	37551627	+	0.194839	0.0009885856306794528	mutated p65 motif
chr4:38080460_C_T	chr4	38080360	38080560	+	0.123977	2.59367896335437e-09	mutated p65 motif
chr4:38081974_G_A	chr4	38081874	38082074	+	0.12007600000000007	2.59367896335437e-09	mutated p65 motif
chr4:48072366_T_A	chr4	48072266	48072466	+	0.325209	1.0552699599835701e-10	mutated p65 motif
chr4:48073501_G_T	chr4	48073401	48073601	+	-0.319364	7.1615099375242385e-12	mutated p65 motif
chr4:5020342_G_A	chr4	5020242	5020442	+	0.128394	0.00502028059802452	mutated p65 motif
chr4:56043208_T_C	chr4	56043108	56043308	+	-0.22678200000000004	4.58367715392718e-10	mutated p65 motif
chr4:5747078_A_G	chr4	5746978	5747178	+	-0.033878999999999986	0.0432680342088078	mutated p65 motif
chr4:5749116_G_T	chr4	5749016	5749216	+	0.05509200000000003	0.00572637532801495	mutated p65 motif
chr4:5749262_C_T	chr4	5749162	5749362	+	0.12922900000000004	4.03389588161e-24	mutated p65 motif
chr4:5761954_T_G	chr4	5761854	5762054	+	0.1308189999999999	9.696256261402259e-11	mutated p65 motif
chr4:5762623_G_C	chr4	5762523	5762723	+	-0.14282	5.7808756187392e-09	mutated p65 motif
chr4:57939179_A_G	chr4	57939079	57939279	+	-0.084976	1.56335772408177e-05	mutated p65 motif
chr4:71108693_C_T	chr4	71108593	71108793	+	-0.10279499999999996	0.0101779669876373	mutated p65 motif
chr4:74959996_A_G	chr4	74959896	74960096	+	-0.05409999999999998	0.0055722403964579715	mutated p65 motif
chr4:99443394_A_G	chr4	99443294	99443494	+	-0.11554799999999997	0.00262233200403912	mutated p65 motif
chr5:106032729_G_A	chr5	106032629	106032829	+	0.30251300000000003	2.65963286698529e-10	mutated p65 motif
chr5:126437419_T_C	chr5	126437319	126437519	+	-0.237035	3.50705038066391e-05	mutated p65 motif
chr5:129240465_G_T	chr5	129240365	129240565	+	-0.140077	0.0445404935181509	mutated p65 motif
chr5:131793772_G_T	chr5	131793672	131793872	+	0.13660899999999998	0.0036000492034430204	mutated p65 motif
chr5:132295488_G_C	chr5	132295388	132295588	+	0.145972	0.0364650026953195	mutated p65 motif
chr5:14035765_G_A	chr5	14035665	14035865	+	0.11578800000000002	0.00487050750848011	mutated p65 motif
chr5:141196332_G_C	chr5	141196232	141196432	+	0.15137	0.00841063616938563	mutated p65 motif
chr5:141215402_A_G	chr5	141215302	141215502	+	0.15820800000000002	9.566923909135928e-07	mutated p65 motif
chr5:141217607_C_T	chr5	141217507	141217707	+	0.15831099999999998	9.566923909135928e-07	mutated p65 motif
chr5:148665430_C_T	chr5	148665330	148665530	+	0.148154	0.000374673736477474	mutated p65 motif
chr5:148824841_G_A	chr5	148824741	148824941	+	-0.16614800000000002	0.0059083577175002	mutated p65 motif
chr5:169403776_T_G	chr5	169403676	169403876	+	-0.07535200000000003	9.7454733410306e-06	mutated p65 motif
chr5:172338616_G_A	chr5	172338516	172338716	+	0.09224700000000008	0.0424175450147722	mutated p65 motif
chr5:180227816_A_T	chr5	180227716	180227916	+	0.07117299999999993	0.0235159982013772	mutated p65 motif
chr5:34522502_G_A	chr5	34522402	34522602	+	0.12353599999999998	0.0005002789367930692	mutated p65 motif
chr5:34525931_G_A	chr5	34525831	34526031	+	0.08473599999999992	0.0129555212650442	mutated p65 motif
chr5:40040743_T_G	chr5	40040643	40040843	+	0.09799099999999994	0.0168750737139938	mutated p65 motif
chr5:52657068_A_G	chr5	52656968	52657168	+	0.134436	7.87561608137722e-06	mutated p65 motif
chr5:52663928_A_G	chr5	52663828	52664028	+	0.13345699999999994	1.18037379733944e-05	mutated p65 motif
chr5:52663996_C_A	chr5	52663896	52664096	+	0.061931000000000076	0.0304498217526023	mutated p65 motif
chr5:55705457_C_T	chr5	55705357	55705557	+	-0.27337500000000003	1.41552513503425e-08	mutated p65 motif
chr5:56678044_G_C	chr5	56677944	56678144	+	0.06888000000000005	0.0011424938956217801	mutated p65 motif
chr5:64501468_C_T	chr5	64501368	64501568	+	0.03914499999999999	0.0462537457277659	mutated p65 motif
chr5:67307918_G_A	chr5	67307818	67308018	+	0.29077200000000003	1.90934067674583e-09	mutated p65 motif
chr5:72451804_G_A	chr5	72451704	72451904	+	-0.180081	0.011973956580758996	mutated p65 motif
chr5:73423819_T_C	chr5	73423719	73423919	+	0.048792999999999975	0.0191373416854562	mutated p65 motif
chr5:73982349_C_A	chr5	73982249	73982449	+	0.08862000000000002	0.0292844447589259	mutated p65 motif
chr5:75957352_C_G	chr5	75957252	75957452	+	0.14635600000000004	0.000778298584332532	mutated p65 motif
chr5:77814577_A_AT	chr5	77814477	77814677	+	-0.06154399999999999	6.54410751094354e-05	mutated p65 motif
chr5:8783425_C_T	chr5	8783325	8783525	+	-0.17898400000000006	0.0116306017591334	mutated p65 motif
chr5:94488423_C_A	chr5	94488323	94488523	+	-0.16868299999999994	0.0409898289108026	mutated p65 motif
chr6:100748896_T_C	chr6	100748796	100748996	+	-0.07133599999999997	0.0301636444043582	mutated p65 motif
chr6:100750194_G_A	chr6	100750094	100750294	+	-0.07252200000000003	0.0301636444043582	mutated p65 motif
chr6:106984120_G_C	chr6	106984020	106984220	+	0.22938699999999998	6.00618528868095e-14	mutated p65 motif
chr6:11750519_G_A	chr6	11750419	11750619	+	-0.290779	1.0875495096071101e-06	mutated p65 motif
chr6:127209613_C_T	chr6	127209513	127209713	+	-0.202479	5.71833735224931e-07	mutated p65 motif
chr6:131423233_C_T	chr6	131423133	131423333	+	0.178334	0.000122851178533123	mutated p65 motif
chr6:134614761_G_A	chr6	134614661	134614861	+	0.091403	0.0041590245812439105	mutated p65 motif
chr6:151393118_C_A	chr6	151393018	151393218	+	0.08530300000000003	0.00481282743022252	mutated p65 motif
chr6:160109544_GGAAAT_G	chr6	160109444	160109644	+	0.07630599999999997	0.0364598559786038	mutated p65 motif
chr6:160115421_T_C	chr6	160115321	160115521	+	0.08186899999999997	0.0364598559786038	mutated p65 motif
chr6:17394768_G_A	chr6	17394668	17394868	+	-0.217685	0.000489644253431347	mutated p65 motif
chr6:21002352_G_A	chr6	21002252	21002452	+	0.09669300000000004	0.0126682408373631	mutated p65 motif
chr6:30768955_A_G	chr6	30768855	30769055	+	0.17169599999999996	0.000687236150656806	mutated p65 motif
chr6:30770778_C_G	chr6	30770678	30770878	+	0.135714	0.007871699904822041	mutated p65 motif
chr6:31363794_A_G	chr6	31363694	31363894	+	-0.22667	0.000309299169657032	mutated p65 motif
chr6:31363798_C_G	chr6	31363698	31363898	+	-0.22667	0.000309299169657032	mutated p65 motif
chr6:31363847_C_T	chr6	31363747	31363947	+	-0.22729000000000002	0.00018038004211975802	mutated p65 motif
chr6:32222706_A_G	chr6	32222606	32222806	+	-0.07413500000000006	0.000708571977299818	mutated p65 motif
chr6:32361842_G_A	chr6	32361742	32361942	+	-0.10018100000000002	0.0297189829831684	mutated p65 motif
chr6:32362182_T_C	chr6	32362082	32362282	+	-0.08965699999999999	0.0465683119691314	mutated p65 motif
chr6:32712411_C_A	chr6	32712311	32712511	+	-0.213323	0.0289581715585638	mutated p65 motif
chr6:33739716_CGCCCGCCCTGGGGCT_C	chr6	33739616	33739816	+	-0.11795100000000006	0.0016104649525350099	mutated p65 motif
chr6:33739731_T_C	chr6	33739631	33739831	+	-0.12673600000000002	0.000894059981269319	mutated p65 motif
chr6:3916713_C_T	chr6	3916613	3916813	+	0.12310299999999995	5.12066150519742e-05	mutated p65 motif
chr6:3917007_G_C	chr6	3916907	3917107	+	0.123618	5.12066150519742e-05	mutated p65 motif
chr6:3917121_C_T	chr6	3917021	3917221	+	0.12361499999999992	5.12066150519742e-05	mutated p65 motif
chr6:4460769_A_G	chr6	4460669	4460869	+	-0.110562	0.0111194242577211	mutated p65 motif
chr6:44691878_T_C	chr6	44691778	44691978	+	0.15874300000000008	1.2769377874390699e-05	mutated p65 motif
chr6:4600610_A_G	chr6	4600510	4600710	+	0.156138	0.00415606208971909	mutated p65 motif
chr6:54158799_C_T	chr6	54158699	54158899	+	-0.09761599999999998	0.0138290458301075	mutated p65 motif
chr6:7907884_G_C	chr6	7907784	7907984	+	-0.133876	0.0260961348806954	mutated p65 motif
chr6:7995583_T_A	chr6	7995483	7995683	+	0.03131700000000004	0.0344094985508878	mutated p65 motif
chr6:90007681_T_C	chr6	90007581	90007781	+	-0.12150100000000005	0.00559101119942121	mutated p65 motif
chr7:108042910_A_G	chr7	108042810	108043010	+	-0.13468600000000006	0.00617748704354029	mutated p65 motif
chr7:115941428_G_C	chr7	115941328	115941528	+	0.154096	0.00256187373668095	mutated p65 motif
chr7:14791368_C_T	chr7	14791268	14791468	+	-0.15788200000000002	0.0461997112279656	mutated p65 motif
chr7:151284362_A_G	chr7	151284262	151284462	+	0.31193800000000005	3.97339284776271e-12	mutated p65 motif
chr7:155005098_G_A	chr7	155004998	155005198	+	0.21004599999999995	3.8862338306725705e-07	mutated p65 motif
chr7:22736446_T_G	chr7	22736346	22736546	+	-0.14292300000000002	1.8182235469209306e-05	mutated p65 motif
chr7:27159405_C_T	chr7	27159305	27159505	+	0.059427999999999925	0.007087183996471891	mutated p65 motif
chr7:37453413_G_A	chr7	37453313	37453513	+	0.12760000000000005	0.0287457809882287	mutated p65 motif
chr7:47731716_G_A	chr7	47731616	47731816	+	0.28886	2.68301786344505e-05	mutated p65 motif
chr7:53012513_C_T	chr7	53012413	53012613	+	-0.202145	0.0037856147586708797	mutated p65 motif
chr7:5565858_A_T	chr7	5565758	5565958	+	0.11199499999999996	0.0404066696761012	mutated p65 motif
chr7:66146284_A_T	chr7	66146184	66146384	+	-0.086121	0.0289388377385221	mutated p65 motif
chr7:73895385_T_A	chr7	73895285	73895485	+	0.10726000000000002	0.0137126575977446	mutated p65 motif
chr7:92641079_C_G	chr7	92640979	92641179	+	0.12720699999999996	0.015803747804034	mutated p65 motif
chr8:10637552_G_A	chr8	10637452	10637652	+	0.08873599999999993	0.00900576086674206	mutated p65 motif
chr8:10643233_G_T	chr8	10643133	10643333	+	0.094414	0.00900576086674206	mutated p65 motif
chr8:118720556_G_T	chr8	118720456	118720656	+	0.10207200000000004	0.0104480572849137	mutated p65 motif
chr8:118722018_C_T	chr8	118721918	118722118	+	0.10702600000000008	0.0104480572849137	mutated p65 motif
chr8:119457472_A_G	chr8	119457372	119457572	+	0.10573299999999997	4.69684076033617e-05	mutated p65 motif
chr8:13221386_C_G	chr8	13221286	13221486	+	-0.1643	1.00057019599179e-06	mutated p65 motif
chr8:13224375_G_C	chr8	13224275	13224475	+	0.13229799999999992	2.04899148733032e-13	mutated p65 motif
chr8:13513592_C_T	chr8	13513492	13513692	+	0.24456899999999995	3.62146282212547e-08	mutated p65 motif
chr8:141964183_C_T	chr8	141964083	141964283	+	0.09137399999999997	0.0068763752942811	mutated p65 motif
chr8:17455135_T_C	chr8	17455035	17455235	+	-0.11120799999999996	0.0185688023785638	mutated p65 motif
chr8:17468194_A_G	chr8	17468094	17468294	+	0.300195	1.0326071120226298e-41	mutated p65 motif
chr8:17476704_G_A	chr8	17476604	17476804	+	-0.177846	0.0006623889019275349	mutated p65 motif
chr8:19327507_G_A	chr8	19327407	19327607	+	-0.190855	0.00314656444072996	mutated p65 motif
chr8:19611237_G_A	chr8	19611137	19611337	+	-0.192175	1.52421699817427e-05	mutated p65 motif
chr8:20286132_A_G	chr8	20286032	20286232	+	-0.395361	3.0791465438906e-16	mutated p65 motif
chr8:20286501_T_G	chr8	20286401	20286601	+	-0.350009	1.61813132810928e-12	mutated p65 motif
chr8:20286552_G_T	chr8	20286452	20286652	+	-0.35017200000000004	1.61813132810928e-12	mutated p65 motif
chr8:23019702_G_C	chr8	23019602	23019802	+	0.115101	0.00459768184047058	mutated p65 motif
chr8:23400615_C_T	chr8	23400515	23400715	+	-0.04863199999999995	0.0343481569032975	mutated p65 motif
chr8:39796310_A_G	chr8	39796210	39796410	+	0.15667899999999998	1.10982357139819e-06	mutated p65 motif
chr8:39797471_G_C	chr8	39797371	39797571	+	0.172771	1.23761003920072e-06	mutated p65 motif
chr8:40247720_T_A	chr8	40247620	40247820	+	0.256911	0.0072341882799678405	mutated p65 motif
chr8:6344516_C_T	chr8	6344416	6344616	+	-0.08526800000000001	3.1470679645281e-05	mutated p65 motif
chr8:68892654_C_A	chr8	68892554	68892754	+	0.10223500000000008	0.00505932707437713	mutated p65 motif
chr8:70093514_T_C	chr8	70093414	70093614	+	0.16909300000000005	2.32493202465711e-06	mutated p65 motif
chr8:74283383_C_<	chr8	74283283	74283483	+	-0.22943899999999998	2.3370436248239e-05	mutated p65 motif
chr8:92191799_A_T	chr8	92191699	92191899	+	0.16463100000000008	0.0109356946067353	mutated p65 motif
chr8:95876868_G_A	chr8	95876768	95876968	+	-0.206358	6.083789671060072e-10	mutated p65 motif
chr8:95877285_C_T	chr8	95877185	95877385	+	-0.20632399999999995	6.083789671060072e-10	mutated p65 motif
chr8:95959808_A_G	chr8	95959708	95959908	+	0.10287800000000002	0.020014600176309	mutated p65 motif
chr9:117313489_A_C	chr9	117313389	117313589	+	0.2027770000000001	0.0012867794193106	mutated p65 motif
chr9:117666924_A_T	chr9	117666824	117667024	+	-0.08775500000000003	3.76305636451969e-09	mutated p65 motif
chr9:130605385_C_T	chr9	130605285	130605485	+	0.13761499999999993	0.0154765670225542	mutated p65 motif
chr9:130610015_T_C	chr9	130609915	130610115	+	0.11394899999999995	0.0363566388721945	mutated p65 motif
chr9:131900920_C_T	chr9	131900820	131901020	+	-0.109356	0.0155671760176987	mutated p65 motif
chr9:132249694_C_T	chr9	132249594	132249794	+	0.11309300000000001	0.0013096636426311698	mutated p65 motif
chr9:134612153_A_C	chr9	134612053	134612253	+	0.07037700000000002	0.0281715698723999	mutated p65 motif
chr9:13803515_A_C	chr9	13803415	13803615	+	0.244819	6.66715383403822e-05	mutated p65 motif
chr9:139049823_G_A	chr9	139049723	139049923	+	0.10469399999999997	0.00034501449980441697	mutated p65 motif
chr9:139539103_C_T	chr9	139539003	139539203	+	0.34262800000000004	0.00173663112717352	mutated p65 motif
chr9:18393763_T_G	chr9	18393663	18393863	+	0.15009399999999995	0.01248807063739	mutated p65 motif
chr9:21595717_T_C	chr9	21595617	21595817	+	0.06491800000000003	0.0322428052876256	mutated p65 motif
chr9:27118707_G_A	chr9	27118607	27118807	+	-0.057749	0.0401063829781606	mutated p65 motif
chr9:4496265_A_T	chr9	4496165	4496365	+	-0.17563900000000002	0.0147583378515398	mutated p65 motif
chr9:71714693_C_T	chr9	71714593	71714793	+	0.14301700000000006	0.0026999854718340803	mutated p65 motif
chr9:71792581_G_A	chr9	71792481	71792681	+	0.05725000000000002	0.0327526761699074	mutated p65 motif
chr9:71799697_T_A	chr9	71799597	71799797	+	0.057276	0.0327526761699074	mutated p65 motif
chr9:72871430_G_C	chr9	72871330	72871530	+	0.14189700000000005	0.0118404443919251	mutated p65 motif
chr9:79317163_G_A	chr9	79317063	79317263	+	0.09395399999999997	0.0313513706865059	mutated p65 motif
chr9:79317244_G_C	chr9	79317144	79317344	+	0.09378699999999997	0.0313513706865059	mutated p65 motif
chr9:79318998_A_G	chr9	79318898	79319098	+	0.10458500000000004	0.02014127620284	mutated p65 motif
chr9:85836913_G_C	chr9	85836813	85837013	+	0.07915499999999998	0.00131911014068645	mutated p65 motif
chr10:104386934_T_C	chr10	104386834	104387034	+	0.12672499999999998	0.000652642451496127	mutated ERG motif
chr10:104953547_T_C	chr10	104953447	104953647	+	0.18867200000000006	0.0025441387600028	mutated ERG motif
chr10:105438112_T_C	chr10	105438012	105438212	+	0.19395	0.0284384366968188	mutated ERG motif
chr10:116293820_G_A	chr10	116293720	116293920	+	-0.115319	0.0433637244418631	mutated ERG motif
chr10:12877510_C_T	chr10	12877410	12877610	+	-0.195267	0.00632543336152635	mutated ERG motif
chr10:14030921_C_T	chr10	14030821	14031021	+	0.060135999999999974	0.0065026895783069204	mutated ERG motif
chr10:14031188_A_G	chr10	14031088	14031288	+	0.057051000000000074	0.0065026895783069204	mutated ERG motif
chr10:14051227_C_T	chr10	14051127	14051327	+	-0.04539700000000002	0.033161916802712	mutated ERG motif
chr10:14052388_T_A	chr10	14052288	14052488	+	-0.045066	0.033161916802712	mutated ERG motif
chr10:14052850_G_A	chr10	14052750	14052950	+	0.11196000000000006	1.8064187086953398e-11	mutated ERG motif
chr10:14053187_A_G	chr10	14053087	14053287	+	0.12848900000000008	1.09486024430821e-05	mutated ERG motif
chr10:14053244_T_C	chr10	14053144	14053344	+	0.11193999999999993	1.8064187086953398e-11	mutated ERG motif
chr10:17048022_C_T	chr10	17047922	17048122	+	0.08209300000000007	0.0453315548394635	mutated ERG motif
chr10:17250978_C_T	chr10	17250878	17251078	+	-0.15731199999999998	0.0326579716278194	mutated ERG motif
chr10:17629465_G_A	chr10	17629365	17629565	+	0.17174200000000006	0.00861161530426745	mutated ERG motif
chr10:29845316_A_G	chr10	29845216	29845416	+	0.29299899999999995	6.027504004745259e-08	mutated ERG motif
chr10:30929260_A_G	chr10	30929160	30929360	+	0.057805	0.014291425980175	mutated ERG motif
chr10:30930606_A_C	chr10	30930506	30930706	+	0.057885999999999986	0.014291425980175	mutated ERG motif
chr10:3849302_C_A	chr10	3849202	3849402	+	0.10791300000000004	7.30477603210821e-07	mutated ERG motif
chr10:3849608_C_A	chr10	3849508	3849708	+	0.09708899999999998	1.75945108461659e-05	mutated ERG motif
chr10:3965100_C_T	chr10	3965000	3965200	+	-0.204092	1.1888694320144899e-27	mutated ERG motif
chr10:3966697_A_T	chr10	3966597	3966797	+	-0.204083	1.1888694320144899e-27	mutated ERG motif
chr10:3966766_A_T	chr10	3966666	3966866	+	-0.20410300000000006	1.1888694320144899e-27	mutated ERG motif
chr10:3970478_T_C	chr10	3970378	3970578	+	0.19325000000000006	9.124096367715207e-21	mutated ERG motif
chr10:4901247_T_C	chr10	4901147	4901347	+	0.192666	0.00946516662071402	mutated ERG motif
chr10:4909869_G_A	chr10	4909769	4909969	+	0.10827700000000008	0.00400843967713043	mutated ERG motif
chr10:50392711_G_A	chr10	50392611	50392811	+	0.165562	0.007530077045588421	mutated ERG motif
chr10:50760434_A_G	chr10	50760334	50760534	+	0.170246	0.000812801463097629	mutated ERG motif
chr10:5137814_A_T	chr10	5137714	5137914	+	-0.08927700000000005	0.041941217217361	mutated ERG motif
chr10:54077565_GCA_G	chr10	54077465	54077665	+	-0.060796000000000024	0.00382250766812675	mutated ERG motif
chr10:54077568_G_T	chr10	54077468	54077668	+	-0.060796000000000024	0.00382250766812675	mutated ERG motif
chr10:54095002_A_T	chr10	54094902	54095102	+	0.042748999999999926	0.00581214172605086	mutated ERG motif
chr10:56904461_G_A	chr10	56904361	56904561	+	-0.23979	6.34423860488314e-09	mutated ERG motif
chr10:56905761_A_G	chr10	56905661	56905861	+	-0.137762	0.0287927624114654	mutated ERG motif
chr10:56906707_G_A	chr10	56906607	56906807	+	0.24748800000000004	1.896245220702e-12	mutated ERG motif
chr10:59732432_T_C	chr10	59732332	59732532	+	-0.14155	0.030161930298673	mutated ERG motif
chr10:59733269_A_C	chr10	59733169	59733369	+	-0.14160300000000006	0.030161930298673	mutated ERG motif
chr10:60276369_T_C	chr10	60276269	60276469	+	-0.13969199999999998	0.00343773144923838	mutated ERG motif
chr10:60278140_C_T	chr10	60278040	60278240	+	-0.13921500000000006	0.00343773144923838	mutated ERG motif
chr10:70481793_T_A	chr10	70481693	70481893	+	-0.08569600000000001	0.0232970433019297	mutated ERG motif
chr10:70481796_C_A	chr10	70481696	70481896	+	-0.08568700000000001	0.0232970433019297	mutated ERG motif
chr10:71580862_C_G	chr10	71580762	71580962	+	0.12499700000000002	0.000149184579464679	mutated ERG motif
chr10:91174919_C_T	chr10	91174819	91175019	+	-0.07003400000000004	0.0488651938081749	mutated ERG motif
chr11:103507975_C_T	chr11	103507875	103508075	+	-0.042296	0.0110515960419932	mutated ERG motif
chr11:103512513_C_T	chr11	103512413	103512613	+	0.04231099999999999	0.0110515960419932	mutated ERG motif
chr11:103673960_A_G	chr11	103673860	103674060	+	0.10166300000000006	0.008884821758581109	mutated ERG motif
chr11:107708123_C_T	chr11	107708023	107708223	+	0.08907500000000003	0.0022700485053680198	mutated ERG motif
chr11:108739776_G_A	chr11	108739676	108739876	+	0.31813400000000003	2.824006645694689e-20	mutated ERG motif
chr11:110181512_A_G	chr11	110181412	110181612	+	0.11779099999999998	0.00435793266881313	mutated ERG motif
chr11:1145268_C_G	chr11	1145168	1145368	+	0.16458400000000006	0.0180373243956263	mutated ERG motif
chr11:12038130_C_T	chr11	12038030	12038230	+	-0.093856	0.0179365772167227	mutated ERG motif
chr11:12038535_T_A	chr11	12038435	12038635	+	-0.093999	0.0179365772167227	mutated ERG motif
chr11:12203131_C_A	chr11	12203031	12203231	+	0.05249199999999998	0.000861482905467469	mutated ERG motif
chr11:12204581_T_C	chr11	12204481	12204681	+	0.04492099999999999	0.000285480591421135	mutated ERG motif
chr11:12223048_A_T	chr11	12222948	12223148	+	-0.03292499999999998	0.0130355332519993	mutated ERG motif
chr11:12227005_T_G	chr11	12226905	12227105	+	0.04935500000000004	0.0018096085890362	mutated ERG motif
chr11:12229489_G_A	chr11	12229389	12229589	+	0.07731299999999998	0.0029034409947574303	mutated ERG motif
chr11:12232851_A_G	chr11	12232751	12232951	+	0.07292700000000008	0.00012859525109904099	mutated ERG motif
chr11:12246233_G_C	chr11	12246133	12246333	+	-0.08709499999999998	6.73545626657393e-05	mutated ERG motif
chr11:12302837_C_G	chr11	12302737	12302937	+	-0.09099700000000001	0.000527233198453547	mutated ERG motif
chr11:12305051_A_G	chr11	12304951	12305151	+	-0.05856499999999998	0.00582037821055823	mutated ERG motif
chr11:123064766_T_C	chr11	123064666	123064866	+	0.10214999999999996	0.023776933946864	mutated ERG motif
chr11:123302229_T_G	chr11	123302129	123302329	+	-0.16617600000000005	0.0184022456642101	mutated ERG motif
chr11:124706431_T_A	chr11	124706331	124706531	+	0.28183	3.7216627308230297e-07	mutated ERG motif
chr11:128524489_G_T	chr11	128524389	128524589	+	0.16359	0.0436916120020172	mutated ERG motif
chr11:128528593_G_A	chr11	128528493	128528693	+	0.3584209999999999	3.82282518584453e-11	mutated ERG motif
chr11:128529842_C_T	chr11	128529742	128529942	+	0.2868930000000001	2.6656226452377998e-05	mutated ERG motif
chr11:129695520_CG_C	chr11	129695420	129695620	+	-0.133129	0.000323708503696823	mutated ERG motif
chr11:13127893_C_A	chr11	13127793	13127993	+	-0.07705800000000003	0.010139926929759	mutated ERG motif
chr11:32125855_A_G	chr11	32125755	32125955	+	0.10429999999999996	0.0159989128168272	mutated ERG motif
chr11:36096312_G_A	chr11	36096212	36096412	+	-0.16203800000000002	0.00767778342905545	mutated ERG motif
chr11:42338212_T_TG	chr11	42338112	42338312	+	-0.155719	0.0144300707092846	mutated ERG motif
chr11:43960532_C_T	chr11	43960432	43960632	+	-0.15283200000000002	0.0031405257901350307	mutated ERG motif
chr11:57436530_C_T	chr11	57436430	57436630	+	0.11892100000000005	0.0181667290668257	mutated ERG motif
chr11:68623978_C_T	chr11	68623878	68624078	+	0.14691400000000002	0.0290140785377966	mutated ERG motif
chr11:74029883_G_A	chr11	74029783	74029983	+	0.05790899999999999	0.0260831654387456	mutated ERG motif
chr11:75265957_C_T	chr11	75265857	75266057	+	-0.2105	0.0013630197818317801	mutated ERG motif
chr11:82564357_A_G	chr11	82564257	82564457	+	-0.08119199999999999	0.0277108713053773	mutated ERG motif
chr11:834098_C_T	chr11	833998	834198	+	-0.142872	0.00048573161278037694	mutated ERG motif
chr11:85658886_T_C	chr11	85658786	85658986	+	0.113661	0.0492071501341928	mutated ERG motif
chr11:86193603_T_G	chr11	86193503	86193703	+	0.03972700000000007	0.042978114127116	mutated ERG motif
chr11:94829514_G_T	chr11	94829414	94829614	+	0.212448	0.0330672940690437	mutated ERG motif
chr12:10806466_A_G	chr12	10806366	10806566	+	0.12464799999999998	0.00510723380549431	mutated ERG motif
chr12:10806553_C_T	chr12	10806453	10806653	+	0.12468100000000006	0.00510723380549431	mutated ERG motif
chr12:109896297_T_A	chr12	109896197	109896397	+	0.09528199999999998	0.0172790666608707	mutated ERG motif
chr12:120051269_A_G	chr12	120051169	120051369	+	-0.28257	1.44230564104823e-05	mutated ERG motif
chr12:1225430_T_C	chr12	1225330	1225530	+	-0.123419	0.0108508025805139	mutated ERG motif
chr12:12601953_G_A	chr12	12601853	12602053	+	-0.07454399999999994	0.0240094371351098	mutated ERG motif
chr12:129282180_T_C	chr12	129282080	129282280	+	-0.195346	2.1967011333716505e-05	mutated ERG motif
chr12:129283149_T_C	chr12	129283049	129283249	+	-0.193135	2.1967011333716505e-05	mutated ERG motif
chr12:129287449_G_A	chr12	129287349	129287549	+	0.11760500000000007	0.0032070360092334607	mutated ERG motif
chr12:20182733_T_A	chr12	20182633	20182833	+	0.07047000000000002	0.0360523198252861	mutated ERG motif
chr12:26123345_A_G	chr12	26123245	26123445	+	0.15795500000000007	0.0270300784087279	mutated ERG motif
chr12:26801236_T_C	chr12	26801136	26801336	+	0.13105200000000006	0.00252489664525165	mutated ERG motif
chr12:26856000_A_C	chr12	26855900	26856100	+	-0.11150900000000002	0.029671075222785	mutated ERG motif
chr12:29058063_A_T	chr12	29057963	29058163	+	-0.1783	0.00110205337674131	mutated ERG motif
chr12:29089874_T_C	chr12	29089774	29089974	+	-0.12106199999999999	0.0499320495485845	mutated ERG motif
chr12:31176335_G_A	chr12	31176235	31176435	+	0.19705399999999995	1.25402237384571e-08	mutated ERG motif
chr12:3207241_C_T	chr12	3207141	3207341	+	-0.12401	0.00676994285770433	mutated ERG motif
chr12:32292770_A_C	chr12	32292670	32292870	+	0.15618199999999993	0.0441132998352364	mutated ERG motif
chr12:3334856_A_G	chr12	3334756	3334956	+	-0.125297	0.00861922952556418	mutated ERG motif
chr12:58807253_C_A	chr12	58807153	58807353	+	-0.07450299999999999	0.0226906723130702	mutated ERG motif
chr12:6275669_T_G	chr12	6275569	6275769	+	-0.049125999999999996	0.048220280204273	mutated ERG motif
chr12:6278660_C_T	chr12	6278560	6278760	+	-0.05096099999999998	0.0280285782289804	mutated ERG motif
chr12:6292773_T_C	chr12	6292673	6292873	+	0.08568999999999992	9.58719416885855e-07	mutated ERG motif
chr12:66992600_A_C	chr12	66992500	66992700	+	0.204151	0.0178480703173116	mutated ERG motif
chr12:68848826_G_A	chr12	68848726	68848926	+	-0.12924000000000002	0.0424509483515401	mutated ERG motif
chr12:70995497_C_T	chr12	70995397	70995597	+	0.17719300000000004	1.37776684643552e-11	mutated ERG motif
chr12:75964343_AC_A	chr12	75964243	75964443	+	-0.132753	0.0367090604756384	mutated ERG motif
chr12:89618829_G_A	chr12	89618729	89618929	+	0.051799999999999964	0.0198624192678659	mutated ERG motif
chr12:91604465_T_C	chr12	91604365	91604565	+	0.141702	0.0278777117205301	mutated ERG motif
chr12:94984482_A_G	chr12	94984382	94984582	+	-0.252161	0.000220232711222336	mutated ERG motif
chr12:96000467_T_C	chr12	96000367	96000567	+	0.073407	0.0385173438406323	mutated ERG motif
chr12:96057184_A_G	chr12	96057084	96057284	+	0.035389000000000004	0.0170173763868368	mutated ERG motif
chr13:101013404_A_G	chr13	101013304	101013504	+	0.18299999999999994	0.010830237491953	mutated ERG motif
chr13:108012563_A_C	chr13	108012463	108012663	+	-0.26361500000000004	1.58385262932619e-06	mutated ERG motif
chr13:114487679_C_A	chr13	114487579	114487779	+	0.10428500000000007	0.00697895492089071	mutated ERG motif
chr13:114488953_T_G	chr13	114488853	114489053	+	-0.145976	0.007229403656144109	mutated ERG motif
chr13:114489622_C_T	chr13	114489522	114489722	+	0.07851400000000007	0.0343808170219571	mutated ERG motif
chr13:114489625_T_C	chr13	114489525	114489725	+	0.10468599999999996	0.00697895492089071	mutated ERG motif
chr13:31735400_G_A	chr13	31735300	31735500	+	-0.06333599999999995	0.0488196585624816	mutated ERG motif
chr13:36850446_G_T	chr13	36850346	36850546	+	-0.287368	1.34993374946392e-06	mutated ERG motif
chr13:39145560_A_G	chr13	39145460	39145660	+	0.363202	5.87924611693016e-09	mutated ERG motif
chr13:43466661_A_G	chr13	43466561	43466761	+	0.10026999999999996	0.00226546032508439	mutated ERG motif
chr13:43598575_T_G	chr13	43598475	43598675	+	-0.154198	0.000503499887323052	mutated ERG motif
chr13:59849239_A_G	chr13	59849139	59849339	+	0.15792700000000004	0.00514323397013711	mutated ERG motif
chr13:95939819_T_C	chr13	95939719	95939919	+	0.177242	0.0187147161644152	mutated ERG motif
chr13:96137405_GA_G	chr13	96137305	96137505	+	-0.21118400000000004	9.107793650077673e-09	mutated ERG motif
chr14:23018665_C_G	chr14	23018565	23018765	+	0.09323000000000004	0.00182331794249868	mutated ERG motif
chr14:23018822_G_A	chr14	23018722	23018922	+	0.08355800000000002	0.0012529389311883	mutated ERG motif
chr14:34124784_G_A	chr14	34124684	34124884	+	-0.231562	1.8479094091389998e-08	mutated ERG motif
chr14:34125374_A_G	chr14	34125274	34125474	+	-0.14068999999999998	0.00304276395989502	mutated ERG motif
chr14:37134491_T_A	chr14	37134391	37134591	+	0.24316999999999997	0.0139528003572222	mutated ERG motif
chr14:65710580_T_G	chr14	65710480	65710680	+	-0.08198999999999995	9.699577457132901e-05	mutated ERG motif
chr14:65711148_T_C	chr14	65711048	65711248	+	-0.08411599999999997	0.000254936988204679	mutated ERG motif
chr14:65717871_C_T	chr14	65717771	65717971	+	-0.07331000000000004	0.0187303841409263	mutated ERG motif
chr14:69515858_TC_T	chr14	69515758	69515958	+	0.08510399999999996	0.0452527266255605	mutated ERG motif
chr14:69515859_C_T	chr14	69515759	69515959	+	0.09004299999999997	0.0376785810681376	mutated ERG motif
chr14:91708823_C_T	chr14	91708723	91708923	+	0.15556800000000004	0.0006641815418039848	mutated ERG motif
chr14:95721417_C_A	chr14	95721317	95721517	+	-0.159063	0.00580307710851004	mutated ERG motif
chr14:95998464_T_C	chr14	95998364	95998564	+	-0.04884499999999997	0.0371251460722835	mutated ERG motif
chr14:96013941_G_A	chr14	96013841	96014041	+	0.14112899999999995	0.0335238844761337	mutated ERG motif
chr15:101254053_G_A	chr15	101253953	101254153	+	0.15814700000000004	0.00319988673824968	mutated ERG motif
chr15:25103660_A_G	chr15	25103560	25103760	+	-0.22928800000000002	0.000546228950988055	mutated ERG motif
chr15:25201037_C_T	chr15	25200937	25201137	+	-0.20918899999999999	0.0480770227039897	mutated ERG motif
chr15:33536932_T_C	chr15	33536832	33537032	+	0.2256640000000001	0.000546430069220838	mutated ERG motif
chr15:38361447_C_T	chr15	38361347	38361547	+	-0.18295799999999998	0.0414717386890983	mutated ERG motif
chr15:39569380_G_T	chr15	39569280	39569480	+	0.08308800000000005	0.00220822681188549	mutated ERG motif
chr15:42225260_G_T	chr15	42225160	42225360	+	0.030781999999999976	0.0473315792677155	mutated ERG motif
chr15:42226255_C_T	chr15	42226155	42226355	+	0.05345500000000003	0.000387293886029337	mutated ERG motif
chr15:45924015_T_C	chr15	45923915	45924115	+	0.203955	0.0017087799154686199	mutated ERG motif
chr15:57677490_T_C	chr15	57677390	57677590	+	-0.200443	5.32249256078417e-14	mutated ERG motif
chr15:79975476_A_G	chr15	79975376	79975576	+	-0.10093200000000002	0.0161992129553528	mutated ERG motif
chr15:80189058_GCGTGCGCGCGCCGGGAGGGGAAA_G	chr15	80188958	80189158	+	-0.13950999999999994	0.0135255701969331	mutated ERG motif
chr15:89455768_C_G	chr15	89455668	89455868	+	0.15993999999999994	0.0035910839301908	mutated ERG motif
chr15:90717755_C_G	chr15	90717655	90717855	+	0.21098100000000009	0.0018261845999754801	mutated ERG motif
chr15:90717800_C_G	chr15	90717700	90717900	+	0.216464	0.0018261845999754801	mutated ERG motif
chr15:92060614_A_G	chr15	92060514	92060714	+	0.20171300000000006	0.00145291199819799	mutated ERG motif
chr15:96100923_A_G	chr15	96100823	96101023	+	0.100947	0.0148424114841802	mutated ERG motif
chr16:11904429_A_T	chr16	11904329	11904529	+	-0.19829400000000005	0.00483219476266764	mutated ERG motif
chr16:16098475_G_A	chr16	16098375	16098575	+	-0.12240700000000004	0.00207134808234751	mutated ERG motif
chr16:2016361_G_A	chr16	2016261	2016461	+	-0.146208	0.0191594803933086	mutated ERG motif
chr16:24704490_G_C	chr16	24704390	24704590	+	-0.17006400000000002	0.0380287382625314	mutated ERG motif
chr16:3493240_A_C	chr16	3493140	3493340	+	-0.23432	0.0118568904804401	mutated ERG motif
chr16:50741186_C_A	chr16	50741086	50741286	+	-0.14996700000000002	0.0041174636784586	mutated ERG motif
chr16:59363073_T_C	chr16	59362973	59363173	+	0.20318400000000006	0.0481664283958391	mutated ERG motif
chr16:76378918_A_T	chr16	76378818	76379018	+	0.251904	0.000179555174197423	mutated ERG motif
chr16:77112422_T_G	chr16	77112322	77112522	+	0.192842	0.000233172377589558	mutated ERG motif
chr16:77324406_T_G	chr16	77324306	77324506	+	0.07501999999999998	1.25656031499913e-12	mutated ERG motif
chr16:77329464_T_C	chr16	77329364	77329564	+	0.07111099999999992	3.84770820734267e-12	mutated ERG motif
chr16:77337655_A_G	chr16	77337555	77337755	+	-0.02949399999999996	0.0101999996979203	mutated ERG motif
chr16:81730809_G_A	chr16	81730709	81730909	+	0.14901999999999993	3.04855518615468e-05	mutated ERG motif
chr16:86375805_C_G	chr16	86375705	86375905	+	0.08940000000000002	0.0468369008685788	mutated ERG motif
chr17:15818291_T_C	chr17	15818191	15818391	+	0.19822700000000004	0.0176021130689758	mutated ERG motif
chr17:16813508_G_T	chr17	16813408	16813608	+	0.16446400000000005	0.0108304241161607	mutated ERG motif
chr17:260631_C_T	chr17	260531	260731	+	0.16035200000000005	0.0084119283276384	mutated ERG motif
chr17:4001993_G_A	chr17	4001893	4002093	+	-0.091211	0.025558353899448	mutated ERG motif
chr17:40781561_G_T	chr17	40781461	40781661	+	0.19902700000000006	0.0381782544051242	mutated ERG motif
chr17:41842937_C_T	chr17	41842837	41843037	+	-0.15289999999999998	0.0301989291495981	mutated ERG motif
chr17:41844689_C_T	chr17	41844589	41844789	+	-0.16228400000000004	0.0243727554549638	mutated ERG motif
chr17:44272552_C_T	chr17	44272452	44272652	+	0.205661	1.9526815584085398e-07	mutated ERG motif
chr17:44357655_G_C	chr17	44357555	44357755	+	0.18958199999999992	0.0111588133928109	mutated ERG motif
chr17:5324207_G_A	chr17	5324107	5324307	+	-0.10837399999999996	0.0232620920321623	mutated ERG motif
chr17:5728909_T_G	chr17	5728809	5729009	+	-0.08219399999999992	5.47057953772787e-06	mutated ERG motif
chr17:5730117_T_C	chr17	5730017	5730217	+	0.10879799999999996	1.78661800062175e-10	mutated ERG motif
chr17:6092546_C_A	chr17	6092446	6092646	+	0.17820500000000006	0.00105170647080779	mutated ERG motif
chr17:62404441_T_C	chr17	62404341	62404541	+	0.07573999999999992	3.6381130724728397e-09	mutated ERG motif
chr17:62409586_C_G	chr17	62409486	62409686	+	0.07723300000000001	3.6381130724728397e-09	mutated ERG motif
chr17:64271989_A_C	chr17	64271889	64272089	+	-0.107221	0.0112617906525016	mutated ERG motif
chr17:73775585_G_A	chr17	73775485	73775685	+	0.18462	0.000220455541357473	mutated ERG motif
chr17:7760397_G_A	chr17	7760297	7760497	+	0.12326499999999994	0.0324346670315352	mutated ERG motif
chr17:78865127_C_T	chr17	78865027	78865227	+	0.16595899999999994	0.00120049830028101	mutated ERG motif
chr17:79455402_CCCCGGGGCCTCCGGGATGTTCCGGGGCCGAGTTGTGCCTGTTGCCGTTTCCGGCG_C	chr17	79455302	79455502	+	-0.109558	0.0120764543046215	mutated ERG motif
chr18:11947525_G_A	chr18	11947425	11947625	+	-0.05948700000000001	0.0250888394239949	mutated ERG motif
chr18:3262193_T_C	chr18	3262093	3262293	+	-0.078546	0.0481863329259004	mutated ERG motif
chr18:3263617_G_C	chr18	3263517	3263717	+	0.11514599999999996	0.0481863329259004	mutated ERG motif
chr18:3449792_G_T	chr18	3449692	3449892	+	0.13889700000000005	0.0438763600548712	mutated ERG motif
chr18:3624532_C_T	chr18	3624432	3624632	+	0.11616800000000005	0.0273441803249078	mutated ERG motif
chr18:37949842_G_A	chr18	37949742	37949942	+	-0.05447299999999994	0.0011429561704699599	mutated ERG motif
chr18:394366_G_T	chr18	394266	394466	+	-0.10921099999999999	0.0250669340374174	mutated ERG motif
chr18:51762443_A_G	chr18	51762343	51762543	+	-0.12266500000000002	0.0406741680467821	mutated ERG motif
chr18:51915281_A_C	chr18	51915181	51915381	+	-0.231866	6.16700193935255e-05	mutated ERG motif
chr18:55336081_A_G	chr18	55335981	55336181	+	-0.06381099999999995	0.0123527958739545	mutated ERG motif
chr18:55338423_C_T	chr18	55338323	55338523	+	0.04738900000000002	0.0314472673750871	mutated ERG motif
chr18:57182223_A_G	chr18	57182123	57182323	+	0.09514299999999998	0.000324817325565704	mutated ERG motif
chr18:59500340_A_T	chr18	59500240	59500440	+	-0.190102	0.00017691734626865	mutated ERG motif
chr18:59500641_C_A	chr18	59500541	59500741	+	-0.14091800000000002	0.0036601922683596397	mutated ERG motif
chr18:65397150_G_T	chr18	65397050	65397250	+	0.10969700000000003	0.0416961419266179	mutated ERG motif
chr18:8798374_G_A	chr18	8798274	8798474	+	-0.199318	4.88394445748859e-08	mutated ERG motif
chr18:8799294_G_A	chr18	8799194	8799394	+	-0.186906	9.51582365506844e-06	mutated ERG motif
chr19:11380524_T_C	chr19	11380424	11380624	+	-0.05277600000000005	0.00299990734273812	mutated ERG motif
chr19:16184809_G_C	chr19	16184709	16184909	+	0.09752799999999996	0.00201559792179625	mutated ERG motif
chr19:16190701_G_C	chr19	16190601	16190801	+	0.07876800000000006	0.0038092475851327695	mutated ERG motif
chr19:2274578_T_C	chr19	2274478	2274678	+	-0.16114699999999998	0.0159371976020088	mutated ERG motif
chr19:28915606_T_C	chr19	28915506	28915706	+	0.20209999999999995	0.0152182316713543	mutated ERG motif
chr19:3142502_A_C	chr19	3142402	3142602	+	0.13545699999999994	0.000392355050828037	mutated ERG motif
chr19:43439275_G_A	chr19	43439175	43439375	+	-0.11967699999999998	0.0317637328050041	mutated ERG motif
chr19:44488352_G_A	chr19	44488252	44488452	+	-0.18425	0.00160039751587923	mutated ERG motif
chr19:46792652_A_G	chr19	46792552	46792752	+	0.170632	0.00207920557129558	mutated ERG motif
chr19:46793549_A_G	chr19	46793449	46793649	+	0.106557	0.0280709471604574	mutated ERG motif
chr19:48622211_C_T	chr19	48622111	48622311	+	0.075905	0.009551714716611709	mutated ERG motif
chr19:48707583_G_A	chr19	48707483	48707683	+	-0.06645200000000008	0.00936350781292301	mutated ERG motif
chr19:48713615_G_A	chr19	48713515	48713715	+	-0.234771	1.58737427848382e-15	mutated ERG motif
chr19:48745291_C_T	chr19	48745191	48745391	+	0.09350200000000007	0.0277508062505911	mutated ERG motif
chr19:48761460_A_C	chr19	48761360	48761560	+	-0.055892	0.0298013922051878	mutated ERG motif
chr19:48762328_C_T	chr19	48762228	48762428	+	-0.055958000000000015	0.0298013922051878	mutated ERG motif
chr19:53238414_G_C	chr19	53238314	53238514	+	0.10938900000000007	0.0107239407516976	mutated ERG motif
chr19:53239133_C_G	chr19	53239033	53239233	+	-0.12796799999999994	0.00479606339249728	mutated ERG motif
chr1:101089253_C_T	chr1	101089153	101089353	+	0.082314	0.0047680992428707	mutated ERG motif
chr1:110780773_A_G	chr1	110780673	110780873	+	0.073928	0.0491380679227664	mutated ERG motif
chr1:12046089_G_A	chr1	12045989	12046189	+	-0.288031	6.1033645660404505e-05	mutated ERG motif
chr1:154474131_C_G	chr1	154474031	154474231	+	-0.06738500000000003	0.0315525317629768	mutated ERG motif
chr1:157076633_C_G	chr1	157076533	157076733	+	0.19901	0.0033282759820984697	mutated ERG motif
chr1:158980534_C_T	chr1	158980434	158980634	+	0.06373700000000004	0.0348377184279784	mutated ERG motif
chr1:162827573_G_A	chr1	162827473	162827673	+	-0.169516	1.8447941378178799e-06	mutated ERG motif
chr1:17308158_C_T	chr1	17308058	17308258	+	-0.325284	5.4823270329002295e-09	mutated ERG motif
chr1:198188749_G_A	chr1	198188649	198188849	+	0.19635800000000006	1.40843487231999e-08	mutated ERG motif
chr1:199274467_T_C	chr1	199274367	199274567	+	0.242607	0.00212525009028866	mutated ERG motif
chr1:199825713_G_C	chr1	199825613	199825813	+	0.12671100000000002	0.0199575284710407	mutated ERG motif
chr1:199829615_C_A	chr1	199829515	199829715	+	0.12485400000000002	0.0199575284710407	mutated ERG motif
chr1:208328878_G_A	chr1	208328778	208328978	+	0.08208000000000004	0.0210992074261572	mutated ERG motif
chr1:208329047_C_T	chr1	208328947	208329147	+	0.08209200000000005	0.0210992074261572	mutated ERG motif
chr1:208331042_C_T	chr1	208330942	208331142	+	-0.068328	0.0336875174427329	mutated ERG motif
chr1:208396537_A_AACTTTAGAT	chr1	208396437	208396637	+	0.09775500000000004	0.00211990209963751	mutated ERG motif
chr1:208407437_C_T	chr1	208407337	208407537	+	0.05007799999999996	0.0420505990008206	mutated ERG motif
chr1:210003388_A_C	chr1	210003288	210003488	+	0.05464399999999992	0.0315194428480957	mutated ERG motif
chr1:211812068_C_T	chr1	211811968	211812168	+	0.21113900000000008	6.20516885624093e-05	mutated ERG motif
chr1:22232477_C_T	chr1	22232377	22232577	+	0.12141000000000003	1.68959765035124e-08	mutated ERG motif
chr1:22239774_T_C	chr1	22239674	22239874	+	-0.080592	0.00106802382930719	mutated ERG motif
chr1:22249589_A_G	chr1	22249489	22249689	+	0.06700399999999995	0.0039176596897219605	mutated ERG motif
chr1:22251260_C_T	chr1	22251160	22251360	+	0.08518000000000002	0.000158448134988706	mutated ERG motif
chr1:223930996_C_T	chr1	223930896	223931096	+	0.13653900000000008	4.4696324511629007e-10	mutated ERG motif
chr1:243416525_T_C	chr1	243416425	243416625	+	0.052122	0.0185087510401345	mutated ERG motif
chr1:244489419_G_A	chr1	244489319	244489519	+	0.050875	0.0103325854627591	mutated ERG motif
chr1:244489420_T_A	chr1	244489320	244489520	+	0.050875	0.0103325854627591	mutated ERG motif
chr1:246039192_C_T	chr1	246039092	246039292	+	-0.211199	4.7343493981623396e-08	mutated ERG motif
chr1:248029346_T_C	chr1	248029246	248029446	+	-0.141841	0.041403207523864	mutated ERG motif
chr1:31230099_G_A	chr1	31229999	31230199	+	0.14232600000000006	0.0236930883177832	mutated ERG motif
chr1:3773251_A_C	chr1	3773151	3773351	+	0.06221100000000001	0.0137424102113036	mutated ERG motif
chr1:3774549_C_T	chr1	3774449	3774649	+	0.06274899999999994	0.0138762764888417	mutated ERG motif
chr1:39492462_C_T	chr1	39492362	39492562	+	-0.14570700000000006	0.000615128031562522	mutated ERG motif
chr1:55742210_A_G	chr1	55742110	55742310	+	0.26750100000000004	5.229354689989581e-07	mutated ERG motif
chr1:55922799_G_A	chr1	55922699	55922899	+	-0.122214	0.0462716336586741	mutated ERG motif
chr1:56912046_G_T	chr1	56911946	56912146	+	-0.057771000000000024	0.00253707760048143	mutated ERG motif
chr1:56914602_G_A	chr1	56914502	56914702	+	0.067438	0.000381868507230169	mutated ERG motif
chr1:56914815_C_T	chr1	56914715	56914915	+	-0.08446000000000004	0.000123935939584802	mutated ERG motif
chr1:59306031_A_G	chr1	59305931	59306131	+	0.20516499999999996	0.0007855588227090242	mutated ERG motif
chr1:60060076_C_T	chr1	60059976	60060176	+	0.253551	6.90342709406671e-06	mutated ERG motif
chr1:60196367_G_A	chr1	60196267	60196467	+	-0.147642	0.0135748845142864	mutated ERG motif
chr1:66955878_C_T	chr1	66955778	66955978	+	0.20666199999999998	4.46627624761991e-08	mutated ERG motif
chr1:66956685_G_A	chr1	66956585	66956785	+	0.295419	1.8704323977697397e-23	mutated ERG motif
chr1:66957705_G_A	chr1	66957605	66957805	+	0.176674	3.44980584121262e-06	mutated ERG motif
chr1:8180124_G_A	chr1	8180024	8180224	+	0.04715100000000005	0.0351815464328247	mutated ERG motif
chr1:92166931_C_T	chr1	92166831	92167031	+	-0.15446700000000002	0.043128406707146	mutated ERG motif
chr20:19793916_G_T	chr20	19793816	19794016	+	-0.093765	0.00109712475251942	mutated ERG motif
chr20:19794642_G_A	chr20	19794542	19794742	+	-0.07740699999999995	0.00958031760342735	mutated ERG motif
chr20:4111119_C_G	chr20	4111019	4111219	+	-0.123822	0.0144135868394943	mutated ERG motif
chr20:43272825_G_A	chr20	43272725	43272925	+	0.07354899999999998	0.024151626739629	mutated ERG motif
chr20:48196962_G_A	chr20	48196862	48197062	+	0.15752299999999994	2.9932800441630397e-07	mutated ERG motif
chr20:48205494_A_G	chr20	48205394	48205594	+	0.15174500000000002	5.24075762042338e-06	mutated ERG motif
chr20:48211250_C_G	chr20	48211150	48211350	+	0.15622499999999995	7.61978122688689e-07	mutated ERG motif
chr20:48429866_G_C	chr20	48429766	48429966	+	-0.06248999999999999	0.0005611018771171348	mutated ERG motif
chr20:48652180_C_A	chr20	48652080	48652280	+	0.10849700000000008	0.0251008974908053	mutated ERG motif
chr20:6668713_A_G	chr20	6668613	6668813	+	0.07807900000000001	9.17439583700563e-05	mutated ERG motif
chr20:6691494_T_C	chr20	6691394	6691594	+	-0.10343600000000004	0.0287570044615935	mutated ERG motif
chr20:7638973_ACAAT_A	chr20	7638873	7639073	+	0.30275100000000005	2.64277905983311e-06	mutated ERG motif
chr21:25419023_G_T	chr21	25418923	25419123	+	0.196496	0.0036643720710890703	mutated ERG motif
chr21:28218381_C_T	chr21	28218281	28218481	+	-0.11288000000000005	0.0470803878152713	mutated ERG motif
chr21:30113901_G_T	chr21	30113801	30114001	+	0.241055	3.3259931152336607e-09	mutated ERG motif
chr21:30118294_C_T	chr21	30118194	30118394	+	0.16901699999999995	5.2674956799402603e-05	mutated ERG motif
chr21:35936674_A_G	chr21	35936574	35936774	+	0.199086	0.0218892396515	mutated ERG motif
chr21:35936693_C_A	chr21	35936593	35936793	+	0.199016	0.0218892396515	mutated ERG motif
chr21:37821717_T_G	chr21	37821617	37821817	+	0.07694499999999993	0.00647674541743166	mutated ERG motif
chr21:37822686_G_A	chr21	37822586	37822786	+	0.076955	0.00647674541743166	mutated ERG motif
chr21:40222039_G_A	chr21	40221939	40222139	+	0.304778	1.11641821670537e-15	mutated ERG motif
chr21:40224953_G_A	chr21	40224853	40225053	+	0.30523599999999995	1.09353316956762e-15	mutated ERG motif
chr21:40342888_C_T	chr21	40342788	40342988	+	0.17441600000000002	0.0252710147014468	mutated ERG motif
chr21:40371571_C_A	chr21	40371471	40371671	+	0.118672	0.0019261848123623398	mutated ERG motif
chr21:40376636_C_T	chr21	40376536	40376736	+	0.11088399999999997	0.0166267626959945	mutated ERG motif
chr21:40686078_G_C	chr21	40685978	40686178	+	-0.08246400000000004	0.0361490140098311	mutated ERG motif
chr21:42581703_C_T	chr21	42581603	42581803	+	0.11498399999999998	0.00355382061346975	mutated ERG motif
chr22:18638158_G_A	chr22	18638058	18638258	+	0.15321500000000002	0.007888770282838891	mutated ERG motif
chr22:18639631_C_T	chr22	18639531	18639731	+	-0.18142800000000006	0.0020116675906941103	mutated ERG motif
chr22:23523630_C_A	chr22	23523530	23523730	+	-0.12246	0.0108215536004815	mutated ERG motif
chr22:27903116_G_T	chr22	27903016	27903216	+	-0.13548100000000002	0.000577244675129079	mutated ERG motif
chr22:46897424_A_G	chr22	46897324	46897524	+	-0.238713	0.0037851387887792	mutated ERG motif
chr2:108251105_C_T	chr2	108251005	108251205	+	-0.16527800000000006	0.033867084964296	mutated ERG motif
chr2:108251396_C_A	chr2	108251296	108251496	+	0.15427899999999994	0.033867084964296	mutated ERG motif
chr2:113836944_G_T	chr2	113836844	113837044	+	-0.182688	0.00109266355917411	mutated ERG motif
chr2:123506536_A_G	chr2	123506436	123506636	+	-0.19557600000000006	0.0184375376302425	mutated ERG motif
chr2:124936970_T_C	chr2	124936870	124937070	+	0.17408199999999996	7.23257034083675e-05	mutated ERG motif
chr2:159994048_G_A	chr2	159993948	159994148	+	0.11311000000000004	0.0262831253860317	mutated ERG motif
chr2:160891009_T_C	chr2	160890909	160891109	+	0.239055	4.65844730028073e-17	mutated ERG motif
chr2:166914465_C_T	chr2	166914365	166914565	+	-0.16970599999999994	0.000679202074637724	mutated ERG motif
chr2:173107281_G_A	chr2	173107181	173107381	+	-0.200844	0.00380665209292608	mutated ERG motif
chr2:179689843_A_G	chr2	179689743	179689943	+	-0.08993299999999999	0.0220146689168348	mutated ERG motif
chr2:181939078_T_G	chr2	181938978	181939178	+	-0.16535500000000006	3.827665780861509e-06	mutated ERG motif
chr2:188185516_T_G	chr2	188185416	188185616	+	-0.14564699999999994	0.0316422854895684	mutated ERG motif
chr2:192520593_C_T	chr2	192520493	192520693	+	-0.10809500000000001	0.0137135502080592	mutated ERG motif
chr2:205536304_C_T	chr2	205536204	205536404	+	-0.081233	0.0496385115775848	mutated ERG motif
chr2:20762884_T_A	chr2	20762784	20762984	+	-0.03840299999999997	0.0291421849498464	mutated ERG motif
chr2:20779123_A_G	chr2	20779023	20779223	+	0.050247000000000035	0.0008396466552492138	mutated ERG motif
chr2:20810232_T_G	chr2	20810132	20810332	+	-0.05609200000000003	0.000706979858268601	mutated ERG motif
chr2:20815964_G_C	chr2	20815864	20816064	+	0.06147899999999995	0.0006955324662261492	mutated ERG motif
chr2:20816952_G_A	chr2	20816852	20817052	+	0.061535999999999924	0.0006955324662261492	mutated ERG motif
chr2:20818458_G_A	chr2	20818358	20818558	+	-0.052976000000000016	0.0118184408433558	mutated ERG motif
chr2:230995920_C_A	chr2	230995820	230996020	+	0.11049700000000008	0.00025629652621783	mutated ERG motif
chr2:232048612_A_G	chr2	232048512	232048712	+	0.094846	0.0203257839735693	mutated ERG motif
chr2:234062237_A_G	chr2	234062137	234062337	+	0.144061	0.00535996357322474	mutated ERG motif
chr2:234062756_A_G	chr2	234062656	234062856	+	0.14402000000000004	0.00535996357322474	mutated ERG motif
chr2:235782637_G_A	chr2	235782537	235782737	+	-0.17104899999999995	0.0497687863764319	mutated ERG motif
chr2:235890728_C_T	chr2	235890628	235890828	+	0.18802299999999994	2.0826550665846e-06	mutated ERG motif
chr2:237848399_T_G	chr2	237848299	237848499	+	-0.11722300000000002	0.000313216512345758	mutated ERG motif
chr2:36783215_C_T	chr2	36783115	36783315	+	0.05460100000000001	0.00248335581793042	mutated ERG motif
chr2:37409384_G_A	chr2	37409284	37409484	+	0.300886	3.76504524467991e-10	mutated ERG motif
chr2:37470756_C_T	chr2	37470656	37470856	+	-0.197566	0.0118649658401802	mutated ERG motif
chr2:41293647_T_C	chr2	41293547	41293747	+	0.13119899999999995	0.0113901268795466	mutated ERG motif
chr2:41293934_G_A	chr2	41293834	41294034	+	-0.144349	0.0113901268795466	mutated ERG motif
chr2:74404683_A_G	chr2	74404583	74404783	+	0.09794099999999993	0.0499512716282285	mutated ERG motif
chr2:85962310_A_G	chr2	85962210	85962410	+	-0.121251	0.0383392851378165	mutated ERG motif
chr3:104624129_G_T	chr3	104624029	104624229	+	-0.240162	1.2607360970144502e-05	mutated ERG motif
chr3:104624435_C_G	chr3	104624335	104624535	+	-0.263181	2.47694706301046e-12	mutated ERG motif
chr3:104628866_A_C	chr3	104628766	104628966	+	-0.263252	2.47694706301046e-12	mutated ERG motif
chr3:107678877_G_A	chr3	107678777	107678977	+	0.11620399999999995	0.00133118164433224	mutated ERG motif
chr3:110247192_T_C	chr3	110247092	110247292	+	0.17186300000000002	0.000722574866628914	mutated ERG motif
chr3:112091526_T_C	chr3	112091426	112091626	+	-0.058761999999999974	0.0197087519000753	mutated ERG motif
chr3:124606753_T_A	chr3	124606653	124606853	+	-0.09711399999999998	0.01548674780105	mutated ERG motif
chr3:133020705_C_A	chr3	133020605	133020805	+	-0.13499499999999998	0.0108817457305249	mutated ERG motif
chr3:147032213_G_GA	chr3	147032113	147032313	+	0.17196999999999996	0.0273705192342161	mutated ERG motif
chr3:147054867_T_C	chr3	147054767	147054967	+	0.239892	8.927967827735771e-07	mutated ERG motif
chr3:149225582_C_A	chr3	149225482	149225682	+	-0.08029599999999998	0.00853414924065085	mutated ERG motif
chr3:151484414_G_C	chr3	151484314	151484514	+	0.11782899999999995	0.0129046696766056	mutated ERG motif
chr3:157008596_G_A	chr3	157008496	157008696	+	0.17088199999999998	2.70332472470208e-09	mutated ERG motif
chr3:157070399_G_A	chr3	157070299	157070499	+	0.06777200000000005	0.0274812525017696	mutated ERG motif
chr3:168822959_T_A	chr3	168822859	168823059	+	0.04668500000000009	0.00539952151863372	mutated ERG motif
chr3:168831430_G_C	chr3	168831330	168831530	+	-0.05228999999999995	0.00310746285275599	mutated ERG motif
chr3:172392168_G_A	chr3	172392068	172392268	+	0.14200400000000002	0.009281223154012141	mutated ERG motif
chr3:173112505_A_G	chr3	173112405	173112605	+	0.08085299999999995	0.00156849016550924	mutated ERG motif
chr3:191065283_G_A	chr3	191065183	191065383	+	0.16339899999999996	0.00361989391050812	mutated ERG motif
chr3:191772911_C_T	chr3	191772811	191773011	+	-0.17972100000000002	0.0360646582537006	mutated ERG motif
chr3:191887870_G_A	chr3	191887770	191887970	+	-0.209608	0.0270896242912083	mutated ERG motif
chr3:194291395_C_A	chr3	194291295	194291495	+	-0.198689	0.00289986537010673	mutated ERG motif
chr3:194308889_A_G	chr3	194308789	194308989	+	0.146142	0.000657127576296904	mutated ERG motif
chr3:194871405_G_A	chr3	194871305	194871505	+	0.10942600000000002	0.000110886361944558	mutated ERG motif
chr3:194875140_A_G	chr3	194875040	194875240	+	0.110861	0.000110886361944558	mutated ERG motif
chr3:197212490_C_T	chr3	197212390	197212590	+	0.07851300000000005	0.0240829957649854	mutated ERG motif
chr3:197214763_A_G	chr3	197214663	197214863	+	0.06971499999999997	0.0488345518169112	mutated ERG motif
chr3:197215230_T_C	chr3	197215130	197215330	+	0.10648699999999998	0.000148479715387271	mutated ERG motif
chr3:25499525_G_A	chr3	25499425	25499625	+	0.165725	0.00209033576901225	mutated ERG motif
chr3:32453605_G_C	chr3	32453505	32453705	+	0.08852499999999996	0.000127487557508877	mutated ERG motif
chr3:35702884_GAAAAGAGATA_G	chr3	35702784	35702984	+	0.200444	0.0253461005606461	mutated ERG motif
chr3:36235084_G_A	chr3	36234984	36235184	+	-0.193745	0.00239090268425948	mutated ERG motif
chr3:42002761_A_G	chr3	42002661	42002861	+	0.096457	0.010225266688442	mutated ERG motif
chr3:64974149_T_C	chr3	64974049	64974249	+	0.15639899999999995	0.0100910845289763	mutated ERG motif
chr3:72397284_C_A	chr3	72397184	72397384	+	-0.185516	0.0286206815639683	mutated ERG motif
chr3:73046544_T_C	chr3	73046444	73046644	+	0.122842	0.0245144059846492	mutated ERG motif
chr3:7673430_G_A	chr3	7673330	7673530	+	0.15058300000000002	0.0007446447358919548	mutated ERG motif
chr3:87399504_A_G	chr3	87399404	87399604	+	0.23693999999999996	0.000116564063441647	mutated ERG motif
chr3:896238_A_G	chr3	896138	896338	+	-0.17793600000000004	0.0274195910305112	mutated ERG motif
chr3:98494660_C_G	chr3	98494560	98494760	+	0.17694700000000008	5.40258512371534e-25	mutated ERG motif
chr3:98500088_T_C	chr3	98499988	98500188	+	0.18455200000000005	1.26691318018333e-27	mutated ERG motif
chr3:99724792_G_A	chr3	99724692	99724892	+	0.175485	7.0768883512686794e-06	mutated ERG motif
chr4:113194675_G_A	chr4	113194575	113194775	+	-0.22341100000000005	3.55138212788192e-07	mutated ERG motif
chr4:120017677_C_T	chr4	120017577	120017777	+	-0.15651700000000002	0.0276274493193258	mutated ERG motif
chr4:145578799_C_T	chr4	145578699	145578899	+	0.07219700000000008	0.0234736171636035	mutated ERG motif
chr4:149752356_T_C	chr4	149752256	149752456	+	0.03871499999999994	0.0266390100259826	mutated ERG motif
chr4:149758064_C_T	chr4	149757964	149758164	+	-0.05061199999999999	0.0266390100259826	mutated ERG motif
chr4:169307428_T_C	chr4	169307328	169307528	+	0.233667	8.16386712819643e-11	mutated ERG motif
chr4:177804916_C_T	chr4	177804816	177805016	+	0.24316000000000004	2.06459205334559e-09	mutated ERG motif
chr4:177806122_T_C	chr4	177806022	177806222	+	0.2432	2.06459205334559e-09	mutated ERG motif
chr4:184359388_G_A	chr4	184359288	184359488	+	0.101931	0.0411551997488581	mutated ERG motif
chr4:184360645_G_A	chr4	184360545	184360745	+	0.16097999999999998	0.0011071307827687801	mutated ERG motif
chr4:186177083_C_T	chr4	186176983	186177183	+	0.32472500000000004	2.10241901835977e-07	mutated ERG motif
chr4:26050686_G_GA	chr4	26050586	26050786	+	0.233961	1.7012929036442302e-05	mutated ERG motif
chr4:29155776_G_T	chr4	29155676	29155876	+	0.12989099999999998	0.0334654830106289	mutated ERG motif
chr4:29310803_A_G	chr4	29310703	29310903	+	-0.11564100000000001	0.0288479755836293	mutated ERG motif
chr4:30755382_A_G	chr4	30755282	30755482	+	-0.11467500000000005	0.000131355064615714	mutated ERG motif
chr4:39021910_C_T	chr4	39021810	39022010	+	-0.204068	0.0237385860527663	mutated ERG motif
chr4:39070416_CAG_C	chr4	39070316	39070516	+	-0.207154	0.0065967700755018704	mutated ERG motif
chr4:41011718_C_G	chr4	41011618	41011818	+	0.11282000000000005	0.0405557764698143	mutated ERG motif
chr4:4258887_C_T	chr4	4258787	4258987	+	-0.26474000000000003	4.97912802794015e-08	mutated ERG motif
chr4:4259085_T_G	chr4	4258985	4259185	+	0.31993299999999997	4.49427261962346e-12	mutated ERG motif
chr4:5022616_G_A	chr4	5022516	5022716	+	0.13006300000000004	0.007605836051669759	mutated ERG motif
chr4:56043221_G_A	chr4	56043121	56043321	+	-0.22680300000000006	4.58367715392718e-10	mutated ERG motif
chr4:5751066_C_CG	chr4	5750966	5751166	+	-0.09788200000000002	2.11977070764754e-08	mutated ERG motif
chr4:57522650_GCCGGCCT_G	chr4	57522550	57522750	+	-0.168977	0.0261890314806341	mutated ERG motif
chr4:5762574_C_T	chr4	5762474	5762674	+	0.10587000000000002	9.8992280232251e-06	mutated ERG motif
chr4:57944831_C_T	chr4	57944731	57944931	+	0.050413000000000034	0.0295659037329841	mutated ERG motif
chr4:57950752_C_T	chr4	57950652	57950852	+	0.056480999999999996	0.00896796575093701	mutated ERG motif
chr4:57951527_C_T	chr4	57951427	57951627	+	-0.08109799999999995	1.56335772408177e-05	mutated ERG motif
chr4:71379156_T_C	chr4	71379056	71379256	+	0.13756599999999994	0.0217310977633952	mutated ERG motif
chr4:71382958_C_T	chr4	71382858	71383058	+	-0.12771100000000002	0.0452741436934002	mutated ERG motif
chr4:71386890_G_A	chr4	71386790	71386990	+	0.17818199999999995	0.00344372650888798	mutated ERG motif
chr4:74978888_T_TAGCAACAGGAGA	chr4	74978788	74978988	+	0.05143900000000001	0.0055722403964579715	mutated ERG motif
chr4:7845067_G_A	chr4	7844967	7845167	+	-0.11227600000000004	0.00616747751299385	mutated ERG motif
chr4:79437903_G_T	chr4	79437803	79438003	+	-0.14212800000000006	0.0017932484560953	mutated ERG motif
chr4:79438932_A_C	chr4	79438832	79439032	+	-0.14220100000000002	0.0017932484560953	mutated ERG motif
chr4:79439806_T_C	chr4	79439706	79439906	+	-0.14229200000000006	0.0017932484560953	mutated ERG motif
chr4:79440248_C_A	chr4	79440148	79440348	+	-0.142094	0.0017932484560953	mutated ERG motif
chr4:8439771_A_G	chr4	8439671	8439871	+	-0.106587	0.0315990651339296	mutated ERG motif
chr4:84437684_G_A	chr4	84437584	84437784	+	-0.185146	0.00264753073498052	mutated ERG motif
chr4:90408690_C_A	chr4	90408590	90408790	+	-0.15584599999999998	0.00412169799035416	mutated ERG motif
chr4:99443585_G_A	chr4	99443485	99443685	+	0.13821099999999995	0.00036107652711319597	mutated ERG motif
chr5:106837754_G_A	chr5	106837654	106837854	+	0.08507799999999999	0.0192197553768157	mutated ERG motif
chr5:114702118_C_CT	chr5	114702018	114702218	+	0.26471	1.46568721036578e-05	mutated ERG motif
chr5:123942709_G_A	chr5	123942609	123942809	+	0.13300900000000004	0.00510015307002712	mutated ERG motif
chr5:133089667_A_G	chr5	133089567	133089767	+	0.24758800000000006	3.20676213007527e-06	mutated ERG motif
chr5:141216764_T_G	chr5	141216664	141216864	+	0.15849199999999994	9.566923909135928e-07	mutated ERG motif
chr5:143075183_C_T	chr5	143075083	143075283	+	0.19802	0.0250751018204083	mutated ERG motif
chr5:148666184_A_G	chr5	148666084	148666284	+	0.19267500000000004	3.82119479232088e-06	mutated ERG motif
chr5:149894054_C_T	chr5	149893954	149894154	+	0.08150200000000007	0.0101021620290097	mutated ERG motif
chr5:1559341_T_C	chr5	1559241	1559441	+	0.24352	0.0107258118922617	mutated ERG motif
chr5:163371689_T_G	chr5	163371589	163371789	+	-0.23936300000000002	9.85734812280486e-08	mutated ERG motif
chr5:169403819_G_A	chr5	169403719	169403919	+	-0.07529600000000003	9.7454733410306e-06	mutated ERG motif
chr5:171788536_C_T	chr5	171788436	171788636	+	0.313658	1.31689977510498e-13	mutated ERG motif
chr5:172337327_T_G	chr5	172337227	172337427	+	0.09478799999999997	0.0287899141342984	mutated ERG motif
chr5:176431258_G_A	chr5	176431158	176431358	+	0.11285900000000006	0.0485026938409956	mutated ERG motif
chr5:180229013_A_C	chr5	180228913	180229113	+	0.085762	0.00711359788179955	mutated ERG motif
chr5:180231255_C_G	chr5	180231155	180231355	+	0.08743999999999996	0.00711359788179955	mutated ERG motif
chr5:33808956_A_G	chr5	33808856	33809056	+	0.202236	0.000230092111325038	mutated ERG motif
chr5:33810584_C_T	chr5	33810484	33810684	+	-0.23443600000000006	0.000167505619930349	mutated ERG motif
chr5:33810669_G_A	chr5	33810569	33810769	+	0.208796	0.000167505619930349	mutated ERG motif
chr5:52652590_C_T	chr5	52652490	52652690	+	0.13445399999999996	7.87561608137722e-06	mutated ERG motif
chr5:52687415_T_C	chr5	52687315	52687515	+	0.291624	3.06202923184323e-08	mutated ERG motif
chr5:52687641_T_C	chr5	52687541	52687741	+	0.135737	0.0117972406307172	mutated ERG motif
chr5:56679092_C_T	chr5	56678992	56679192	+	-0.104867	2.01401196492612e-05	mutated ERG motif
chr5:57384721_T_C	chr5	57384621	57384821	+	-0.197176	0.0037365578417192	mutated ERG motif
chr5:64089910_T_C	chr5	64089810	64090010	+	0.253092	1.5429151172019e-09	mutated ERG motif
chr5:64480933_C_T	chr5	64480833	64481033	+	-0.108769	0.00011214572334486699	mutated ERG motif
chr5:75947817_CCTTT_C	chr5	75947717	75947917	+	-0.16366599999999998	0.007522330018418	mutated ERG motif
chr5:81717062_T_C	chr5	81716962	81717162	+	0.112668	0.0035714320437468298	mutated ERG motif
chr5:81718588_C_T	chr5	81718488	81718688	+	0.13073199999999996	0.0010299881187379	mutated ERG motif
chr5:9046892_T_C	chr5	9046792	9046992	+	-0.17663199999999998	0.0205678798758886	mutated ERG motif
chr5:94081947_C_A	chr5	94081847	94082047	+	-0.163117	0.00856890564697932	mutated ERG motif
chr6:100737353_A_C	chr6	100737253	100737453	+	0.18960200000000005	0.01028569413758	mutated ERG motif
chr6:106487938_C_T	chr6	106487838	106488038	+	0.26343000000000005	0.00293691157964971	mutated ERG motif
chr6:109060516_T_C	chr6	109060416	109060616	+	-0.07904300000000003	0.0398776890967701	mutated ERG motif
chr6:11646945_G_C	chr6	11646845	11647045	+	-0.04441999999999996	0.000994462548681859	mutated ERG motif
chr6:11752628_C_G	chr6	11752528	11752728	+	-0.378031	5.42795734317335e-26	mutated ERG motif
chr6:11754744_G_T	chr6	11754644	11754844	+	-0.41843500000000006	4.676021776191258e-36	mutated ERG motif
chr6:127455821_C_A	chr6	127455721	127455921	+	-0.11959699999999995	1.5042253632881302e-05	mutated ERG motif
chr6:130329498_T_C	chr6	130329398	130329598	+	0.12328000000000006	0.008570677757576991	mutated ERG motif
chr6:131423566_T_A	chr6	131423466	131423666	+	0.16967000000000002	0.000122851178533123	mutated ERG motif
chr6:134768272_C_T	chr6	134768172	134768372	+	-0.13131199999999998	0.0491663603208078	mutated ERG motif
chr6:135062478_C_T	chr6	135062378	135062578	+	0.07954499999999998	0.000976221373237942	mutated ERG motif
chr6:144142590_G_A	chr6	144142490	144142690	+	-0.17323099999999994	0.0264351956854446	mutated ERG motif
chr6:148768476_T_C	chr6	148768376	148768576	+	-0.05997600000000002	0.0164263507790859	mutated ERG motif
chr6:151382470_C_T	chr6	151382370	151382570	+	0.14195400000000002	0.000251002529879246	mutated ERG motif
chr6:151414325_A_G	chr6	151414225	151414425	+	0.222271	0.0016620158838081599	mutated ERG motif
chr6:153406657_G_A	chr6	153406557	153406757	+	0.105804	0.0402700910091011	mutated ERG motif
chr6:156541191_T_A	chr6	156541091	156541291	+	-0.129728	0.00715351884858303	mutated ERG motif
chr6:160117707_C_T	chr6	160117607	160117807	+	0.08179399999999992	0.0364598559786038	mutated ERG motif
chr6:16715404_T_C	chr6	16715304	16715504	+	0.107591	0.000327924817939497	mutated ERG motif
chr6:18147780_G_A	chr6	18147680	18147880	+	-0.135299	0.0272265693530469	mutated ERG motif
chr6:20623605_T_C	chr6	20623505	20623705	+	0.218333	1.09212380269703e-21	mutated ERG motif
chr6:23350714_T_C	chr6	23350614	23350814	+	0.2456649999999999	3.99464300439897e-08	mutated ERG motif
chr6:25405074_C_T	chr6	25404974	25405174	+	-0.12548099999999998	0.0426468064156134	mutated ERG motif
chr6:2711003_G_A	chr6	2710903	2711103	+	-0.21089499999999997	0.0209681232009469	mutated ERG motif
chr6:2783985_T_G	chr6	2783885	2784085	+	0.129448	0.0365392790319896	mutated ERG motif
chr6:2851539_C_T	chr6	2851439	2851639	+	0.11962499999999998	6.5776549323493885e-06	mutated ERG motif
chr6:2859686_A_G	chr6	2859586	2859786	+	-0.04980400000000002	0.0297733872400658	mutated ERG motif
chr6:30180246_T_C	chr6	30180146	30180346	+	0.10908000000000008	0.0420826570151518	mutated ERG motif
chr6:3023956_C_A	chr6	3023856	3024056	+	0.13339299999999998	0.000398208923917196	mutated ERG motif
chr6:30884806_A_C	chr6	30884706	30884906	+	0.0968	0.0357762921217262	mutated ERG motif
chr6:31090599_C_T	chr6	31090499	31090699	+	-0.16146100000000002	0.0263638329109787	mutated ERG motif
chr6:31364569_T_C	chr6	31364469	31364669	+	-0.239373	0.00017735839124776101	mutated ERG motif
chr6:31364790_C_T	chr6	31364690	31364890	+	-0.199263	0.0015539842578386198	mutated ERG motif
chr6:32361130_C_T	chr6	32361030	32361230	+	-0.08938100000000004	0.0465683119691314	mutated ERG motif
chr6:32361841_T_C	chr6	32361741	32361941	+	-0.10018100000000002	0.0297189829831684	mutated ERG motif
chr6:32361953_A_G	chr6	32361853	32362053	+	-0.100319	0.0297189829831684	mutated ERG motif
chr6:32362010_C_T	chr6	32361910	32362110	+	-0.100256	0.0297189829831684	mutated ERG motif
chr6:33740382_G_A	chr6	33740282	33740482	+	-0.136837	6.54864880742092e-05	mutated ERG motif
chr6:37663624_T_C	chr6	37663524	37663724	+	0.14459100000000005	0.0382815233605474	mutated ERG motif
chr6:3912275_C_T	chr6	3912175	3912375	+	0.12583599999999995	5.12066150519742e-05	mutated ERG motif
chr6:4020658_A_G	chr6	4020558	4020758	+	0.10954700000000006	0.0179544848472923	mutated ERG motif
chr6:44692995_G_C	chr6	44692895	44693095	+	0.16343299999999994	1.2769377874390699e-05	mutated ERG motif
chr6:54156793_G_GCTTC	chr6	54156693	54156893	+	-0.12286999999999998	0.0062855201213289	mutated ERG motif
chr6:55393657_T_C	chr6	55393557	55393757	+	0.19461300000000006	0.0197963226346197	mutated ERG motif
chr6:6313540_G_T	chr6	6313440	6313640	+	0.211392	0.0016534604452286199	mutated ERG motif
chr6:85759202_A_T	chr6	85759102	85759302	+	-0.239831	0.00191537057738533	mutated ERG motif
chr6:86092487_G_A	chr6	86092387	86092587	+	0.2539239999999999	6.63144033950146e-06	mutated ERG motif
chr6:86094056_G_A	chr6	86093956	86094156	+	0.2538050000000001	6.63144033950146e-06	mutated ERG motif
chr6:9481801_A_G	chr6	9481701	9481901	+	0.08939600000000003	0.0030769763994382897	mutated ERG motif
chr7:10083316_G_A	chr7	10083216	10083416	+	-0.17864600000000005	0.0194521050864855	mutated ERG motif
chr7:115898177_G_C	chr7	115898077	115898277	+	0.06070399999999997	0.0393638640658262	mutated ERG motif
chr7:115900590_C_T	chr7	115900490	115900690	+	-0.05403199999999997	0.0442130206418682	mutated ERG motif
chr7:115901439_A_T	chr7	115901339	115901539	+	0.07553199999999992	0.0393638640658262	mutated ERG motif
chr7:115939291_G_A	chr7	115939191	115939391	+	0.13980400000000004	0.004304368994523	mutated ERG motif
chr7:132186896_G_A	chr7	132186796	132186996	+	-0.250138	0.000312741036795821	mutated ERG motif
chr7:133992315_C_A	chr7	133992215	133992415	+	-0.23935900000000002	0.00121824956505621	mutated ERG motif
chr7:134855906_G_A	chr7	134855806	134856006	+	0.036713	0.0414653801786272	mutated ERG motif
chr7:137620844_C_T	chr7	137620744	137620944	+	0.09444300000000004	0.0179634142801301	mutated ERG motif
chr7:137942826_T_C	chr7	137942726	137942926	+	0.183944	0.0018733421089757	mutated ERG motif
chr7:143193515_G_A	chr7	143193415	143193615	+	-0.098248	2.62009036332869e-05	mutated ERG motif
chr7:143193943_C_T	chr7	143193843	143194043	+	-0.098277	2.62009036332869e-05	mutated ERG motif
chr7:14791581_T_G	chr7	14791481	14791681	+	-0.15756399999999998	0.0461997112279656	mutated ERG motif
chr7:151284709_G_T	chr7	151284609	151284809	+	0.31195500000000004	3.97339284776271e-12	mutated ERG motif
chr7:155005209_A_G	chr7	155005109	155005309	+	0.210137	3.8862338306725705e-07	mutated ERG motif
chr7:22740513_C_G	chr7	22740413	22740613	+	-0.332117	1.41363996302479e-14	mutated ERG motif
chr7:39786902_G_T	chr7	39786802	39787002	+	0.17220800000000006	0.0036485664785090703	mutated ERG motif
chr7:43625024_T_G	chr7	43624924	43625124	+	0.08168599999999993	0.0433212805084339	mutated ERG motif
chr7:53012225_A_T	chr7	53012125	53012325	+	-0.225194	0.00165990380511905	mutated ERG motif
chr7:53012377_G_A	chr7	53012277	53012477	+	-0.225373	0.00165990380511905	mutated ERG motif
chr7:5814201_C_T	chr7	5814101	5814301	+	-0.16796500000000006	5.054212147326978e-07	mutated ERG motif
chr7:66148302_G_A	chr7	66148202	66148402	+	-0.08656099999999994	0.0289388377385221	mutated ERG motif
chr7:7899987_C_T	chr7	7899887	7900087	+	-0.09564299999999998	0.0139632566952648	mutated ERG motif
chr7:80798697_A_G	chr7	80798597	80798797	+	0.163852	0.0060376022954667105	mutated ERG motif
chr7:83097657_C_G	chr7	83097557	83097757	+	0.10387899999999994	0.018381517003203	mutated ERG motif
chr7:93672750_A_C	chr7	93672650	93672850	+	0.14423599999999992	0.0055933286830303795	mutated ERG motif
chr7:97910637_C_G	chr7	97910537	97910737	+	0.04718999999999995	0.0345565191515212	mutated ERG motif
chr8:104362187_G_A	chr8	104362087	104362287	+	0.057406999999999986	0.0499802189934079	mutated ERG motif
chr8:118718610_T_C	chr8	118718510	118718710	+	0.10353100000000004	0.0104480572849137	mutated ERG motif
chr8:119214984_C_T	chr8	119214884	119215084	+	-0.11212000000000001	0.0328229496234543	mutated ERG motif
chr8:119451204_G_A	chr8	119451104	119451304	+	0.09488699999999994	0.000143377794006917	mutated ERG motif
chr8:119453042_A_C	chr8	119452942	119453142	+	-0.103242	0.000531576552325254	mutated ERG motif
chr8:13219667_G_T	chr8	13219567	13219767	+	-0.16596900000000006	1.2305623242660196e-27	mutated ERG motif
chr8:13225960_A_C	chr8	13225860	13226060	+	0.10027200000000004	9.210033108196093e-07	mutated ERG motif
chr8:13227532_C_T	chr8	13227432	13227632	+	0.13567700000000005	1.66881869150753e-06	mutated ERG motif
chr8:13229684_T_C	chr8	13229584	13229784	+	-0.043072999999999965	0.0219349554859773	mutated ERG motif
chr8:13230164_C_T	chr8	13230064	13230264	+	-0.179647	2.60377641533769e-27	mutated ERG motif
chr8:13513399_C_T	chr8	13513299	13513499	+	0.24549	3.62146282212547e-08	mutated ERG motif
chr8:141600219_G_A	chr8	141600119	141600319	+	-0.07653999999999994	0.0391633407835082	mutated ERG motif
chr8:142139028_G_T	chr8	142138928	142139128	+	-0.099985	0.00612914300334157	mutated ERG motif
chr8:16684041_T_C	chr8	16683941	16684141	+	-0.12961300000000006	0.0110701383182641	mutated ERG motif
chr8:17466313_T_C	chr8	17466213	17466413	+	0.30015400000000003	1.90423330768076e-39	mutated ERG motif
chr8:17468580_G_C	chr8	17468480	17468680	+	0.306505	4.463670667658128e-50	mutated ERG motif
chr8:19327151_C_G	chr8	19327051	19327251	+	0.14731899999999998	0.00016900591054246002	mutated ERG motif
chr8:19333226_C_A	chr8	19333126	19333326	+	-0.07842400000000001	0.031588570302639	mutated ERG motif
chr8:19613134_G_T	chr8	19613034	19613234	+	-0.210018	3.1051771194718e-07	mutated ERG motif
chr8:19614013_G_A	chr8	19613913	19614113	+	-0.213935	1.7337590034965699e-07	mutated ERG motif
chr8:20285702_T_C	chr8	20285602	20285802	+	-0.371574	2.0672575408278094e-14	mutated ERG motif
chr8:23397035_T_C	chr8	23396935	23397135	+	-0.06230499999999999	0.0233766568551735	mutated ERG motif
chr8:40626365_G_T	chr8	40626265	40626465	+	-0.21036700000000005	9.47511930392467e-05	mutated ERG motif
chr8:41053548_C_T	chr8	41053448	41053648	+	-0.185074	0.0311508279677814	mutated ERG motif
chr8:51556107_G_C	chr8	51556007	51556207	+	-0.156486	0.0462210722765208	mutated ERG motif
chr8:58798575_T_A	chr8	58798475	58798675	+	-0.19783900000000001	0.000687039259075921	mutated ERG motif
chr8:61824309_G_A	chr8	61824209	61824409	+	-0.12591399999999994	0.000192840750230537	mutated ERG motif
chr8:6386286_A_G	chr8	6386186	6386386	+	0.1906770000000001	1.2989839205513e-05	mutated ERG motif
chr8:6387042_T_C	chr8	6386942	6387142	+	0.095113	0.0264590695756808	mutated ERG motif
chr8:70094512_G_A	chr8	70094412	70094612	+	0.183059	1.0076811423701e-06	mutated ERG motif
chr8:73349526_T_G	chr8	73349426	73349626	+	0.24764	0.000232411186424121	mutated ERG motif
chr8:8148270_C_G	chr8	8148170	8148370	+	0.16219799999999995	0.000128390599904021	mutated ERG motif
chr8:8221088_C_T	chr8	8220988	8221188	+	0.133729	0.0485739992528464	mutated ERG motif
chr8:8394297_C_T	chr8	8394197	8394397	+	0.13010200000000005	0.00283080830001788	mutated ERG motif
chr8:8869664_G_A	chr8	8869564	8869764	+	0.20245200000000008	5.287520522288521e-05	mutated ERG motif
chr8:89337704_C_T	chr8	89337604	89337804	+	0.11778299999999994	0.00430288750792431	mutated ERG motif
chr8:8940613_G_C	chr8	8940513	8940713	+	0.05933	0.00734147906851127	mutated ERG motif
chr8:92191904_C_T	chr8	92191804	92192004	+	0.140413	0.020124905048688	mutated ERG motif
chr9:101103591_G_A	chr9	101103491	101103691	+	-0.127861	0.0067181431803426	mutated ERG motif
chr9:101103664_A_C	chr9	101103564	101103764	+	-0.12766900000000006	0.0067181431803426	mutated ERG motif
chr9:104434664_A_G	chr9	104434564	104434764	+	0.257022	1.1816438946871998e-08	mutated ERG motif
chr9:104435480_A_G	chr9	104435380	104435580	+	0.193519	2.06211841893439e-05	mutated ERG motif
chr9:107730848_G_T	chr9	107730748	107730948	+	0.10492800000000002	0.0274783809857861	mutated ERG motif
chr9:117440994_GCACTTGCACT_G	chr9	117440894	117441094	+	-0.14466199999999999	0.0106370703566589	mutated ERG motif
chr9:117663550_C_T	chr9	117663450	117663650	+	-0.08809199999999999	3.5354611386890596e-09	mutated ERG motif
chr9:117665187_G_A	chr9	117665087	117665287	+	-0.08807200000000004	3.5354611386890596e-09	mutated ERG motif
chr9:117670664_T_A	chr9	117670564	117670764	+	-0.08807600000000004	3.5354611386890596e-09	mutated ERG motif
chr9:124331465_G_A	chr9	124331365	124331565	+	-0.13630199999999998	0.00173474007606852	mutated ERG motif
chr9:127027412_C_T	chr9	127027312	127027512	+	0.06125200000000008	0.048896356333081	mutated ERG motif
chr9:127029736_G_A	chr9	127029636	127029836	+	0.062435000000000025	0.048896356333081	mutated ERG motif
chr9:130308457_T_A	chr9	130308357	130308557	+	0.12368900000000005	0.0045891163161426215	mutated ERG motif
chr9:132248130_A_G	chr9	132248030	132248230	+	0.10101800000000004	0.00306732989298295	mutated ERG motif
chr9:132253981_C_G	chr9	132253881	132254081	+	0.13573199999999996	0.000341694414443444	mutated ERG motif
chr9:13804111_T_C	chr9	13804011	13804211	+	0.244862	6.66715383403822e-05	mutated ERG motif
chr9:21081850_A_G	chr9	21081750	21081950	+	0.14712400000000006	0.0143332131587154	mutated ERG motif
chr9:5493981_C_T	chr9	5493881	5494081	+	0.09123500000000008	0.0112744724522055	mutated ERG motif
chr9:5500300_A_G	chr9	5500200	5500400	+	0.12419799999999992	0.0059541055989192895	mutated ERG motif
chr9:6099531_T_C	chr9	6099431	6099631	+	0.10232299999999994	5.44144067421138e-05	mutated ERG motif
chr9:6111197_C_T	chr9	6111097	6111297	+	-0.05396899999999994	0.0415466475520125	mutated ERG motif
chr9:6681467_G_A	chr9	6681367	6681567	+	-0.046771000000000014	0.0477346857461033	mutated ERG motif
chr9:699065_C_G	chr9	698965	699165	+	-0.095657	0.00298023589565535	mutated ERG motif
chr9:90184112_A_C	chr9	90184012	90184212	+	0.10637600000000004	5.22081158084167e-09	mutated ERG motif
chr9:90184388_A_G	chr9	90184288	90184488	+	0.07723599999999997	0.000650061191447444	mutated ERG motif
chr9:90184648_T_A	chr9	90184548	90184748	+	0.10639700000000007	5.22081158084167e-09	mutated ERG motif
chr10:101286257_C_T	chr10	101286157	101286357	+	0.24502899999999994	2.8918280829315504e-05	mutated MAGGIE motif
chr10:101287314_C_T	chr10	101287214	101287414	+	0.245162	2.8918280829315504e-05	mutated MAGGIE motif
chr10:101287580_C_T	chr10	101287480	101287680	+	-0.16859000000000002	0.00273150380924132	mutated MAGGIE motif
chr10:101287944_A_C	chr10	101287844	101288044	+	-0.168559	0.00273150380924132	mutated MAGGIE motif
chr10:101288020_A_T	chr10	101287920	101288120	+	0.2452270000000001	2.8918280829315504e-05	mutated MAGGIE motif
chr10:101288099_C_G	chr10	101287999	101288199	+	-0.16852999999999999	0.00273150380924132	mutated MAGGIE motif
chr10:101288238_G_T	chr10	101288138	101288338	+	-0.16852299999999998	0.00273150380924132	mutated MAGGIE motif
chr10:101289123_T_C	chr10	101289023	101289223	+	0.245196	2.8918280829315504e-05	mutated MAGGIE motif
chr10:101289998_A_G	chr10	101289898	101290098	+	-0.168601	0.00273150380924132	mutated MAGGIE motif
chr10:101291593_T_C	chr10	101291493	101291693	+	0.14612400000000006	0.0345840169437838	mutated MAGGIE motif
chr10:101803065_C_T	chr10	101802965	101803165	+	0.17469999999999994	0.00048100074308044297	mutated MAGGIE motif
chr10:101804114_C_T	chr10	101804014	101804214	+	0.201904	7.71976512033117e-05	mutated MAGGIE motif
chr10:101804425_A_G	chr10	101804325	101804525	+	-0.128125	0.0229089147863997	mutated MAGGIE motif
chr10:101805442_C_T	chr10	101805342	101805542	+	0.16938599999999993	0.000539739587868415	mutated MAGGIE motif
chr10:101806252_A_G	chr10	101806152	101806352	+	0.16928299999999996	0.000539739587868415	mutated MAGGIE motif
chr10:104391285_C_T	chr10	104391185	104391385	+	0.12667299999999992	0.000652642451496127	mutated MAGGIE motif
chr10:104393489_A_G	chr10	104393389	104393589	+	0.11343199999999998	0.000822242936590269	mutated MAGGIE motif
chr10:104953007_C_G	chr10	104952907	104953107	+	0.15152600000000005	0.0229139848491917	mutated MAGGIE motif
chr10:104953021_C_A	chr10	104952921	104953121	+	0.15137100000000006	0.031276354134806	mutated MAGGIE motif
chr10:105814139_C_T	chr10	105814039	105814239	+	0.07081099999999996	0.0252369142748277	mutated MAGGIE motif
chr10:105814826_C_A	chr10	105814726	105814926	+	0.07454799999999995	0.0252369142748277	mutated MAGGIE motif
chr10:10838747_A_G	chr10	10838647	10838847	+	0.09476600000000003	0.0218151772242122	mutated MAGGIE motif
chr10:10840535_G_A	chr10	10840435	10840635	+	-0.202749	0.0010032144468142196	mutated MAGGIE motif
chr10:111832438_T_G	chr10	111832338	111832538	+	0.07999599999999996	0.0323684464958564	mutated MAGGIE motif
chr10:114843949_G_A	chr10	114843849	114844049	+	0.181538	0.00659379144308477	mutated MAGGIE motif
chr10:114844510_A_T	chr10	114844410	114844610	+	0.18168700000000004	0.00659379144308477	mutated MAGGIE motif
chr10:115309775_A_G	chr10	115309675	115309875	+	0.07988200000000001	0.0280848656386187	mutated MAGGIE motif
chr10:115309928_C_A	chr10	115309828	115310028	+	0.08001699999999999	0.0280848656386187	mutated MAGGIE motif
chr10:115310098_C_A	chr10	115309998	115310198	+	0.08011199999999996	0.0280848656386187	mutated MAGGIE motif
chr10:115787415_G_A	chr10	115787315	115787515	+	0.184663	0.0021914057038101608	mutated MAGGIE motif
chr10:115787889_C_T	chr10	115787789	115787989	+	0.184713	0.0021914057038101608	mutated MAGGIE motif
chr10:115788312_C_A	chr10	115788212	115788412	+	0.184773	0.0021914057038101608	mutated MAGGIE motif
chr10:116294474_G_A	chr10	116294374	116294574	+	0.12239599999999995	0.0416216271926967	mutated MAGGIE motif
chr10:116294870_C_A	chr10	116294770	116294970	+	-0.11541799999999995	0.0433637244418631	mutated MAGGIE motif
chr10:116295002_T_C	chr10	116294902	116295102	+	0.122711	0.0416216271926967	mutated MAGGIE motif
chr10:116295023_A_G	chr10	116294923	116295123	+	0.122328	0.0416216271926967	mutated MAGGIE motif
chr10:120956728_G_C	chr10	120956628	120956828	+	-0.20755700000000002	8.34806591640182e-12	mutated MAGGIE motif
chr10:120957680_C_A	chr10	120957580	120957780	+	0.216326	8.2455097223121e-16	mutated MAGGIE motif
chr10:120957885_T_C	chr10	120957785	120957985	+	-0.223991	4.97902578875453e-17	mutated MAGGIE motif
chr10:121528204_T_C	chr10	121528104	121528304	+	0.11727700000000008	0.00916072261535332	mutated MAGGIE motif
chr10:121533034_C_T	chr10	121532934	121533134	+	0.121892	0.00916072261535332	mutated MAGGIE motif
chr10:121698752_G_C	chr10	121698652	121698852	+	0.15497700000000006	0.0425719894348937	mutated MAGGIE motif
chr10:121700255_C_T	chr10	121700155	121700355	+	0.155014	0.0425719894348937	mutated MAGGIE motif
chr10:122449241_A_G	chr10	122449141	122449341	+	-0.11012699999999996	0.0251905532477917	mutated MAGGIE motif
chr10:122449956_A_G	chr10	122449856	122450056	+	0.10346099999999993	0.0251905532477917	mutated MAGGIE motif
chr10:122450075_A_G	chr10	122449975	122450175	+	0.101256	0.0259960316412564	mutated MAGGIE motif
chr10:126840272_C_T	chr10	126840172	126840372	+	0.19968299999999994	5.09284091456101e-06	mutated MAGGIE motif
chr10:126840928_A_G	chr10	126840828	126841028	+	0.199639	5.09284091456101e-06	mutated MAGGIE motif
chr10:126842554_G_A	chr10	126842454	126842654	+	0.15467399999999998	0.000324783162622552	mutated MAGGIE motif
chr10:126843367_G_A	chr10	126843267	126843467	+	0.19949799999999995	5.09284091456101e-06	mutated MAGGIE motif
chr10:126844523_T_A	chr10	126844423	126844623	+	0.169304	2.2022212916795106e-05	mutated MAGGIE motif
chr10:126844621_C_T	chr10	126844521	126844721	+	0.15469699999999995	0.000324783162622552	mutated MAGGIE motif
chr10:126846531_C_T	chr10	126846431	126846631	+	0.09618600000000001	0.0216209637731139	mutated MAGGIE motif
chr10:126846738_AG_A	chr10	126846638	126846838	+	0.138258	0.0216614957682437	mutated MAGGIE motif
chr10:126849631_G_T	chr10	126849531	126849731	+	0.09142099999999996	0.0395447161004491	mutated MAGGIE motif
chr10:126850035_A_G	chr10	126849935	126850135	+	0.13566099999999992	0.0114924312316217	mutated MAGGIE motif
chr10:126850367_C_T	chr10	126850267	126850467	+	-0.184835	0.00492879045227742	mutated MAGGIE motif
chr10:126850793_C_G	chr10	126850693	126850893	+	0.14198100000000002	0.000496851050279481	mutated MAGGIE motif
chr10:12877584_T_C	chr10	12877484	12877684	+	-0.203718	0.00632543336152635	mutated MAGGIE motif
chr10:12877675_A_T	chr10	12877575	12877775	+	-0.203813	0.00632543336152635	mutated MAGGIE motif
chr10:12877925_A_G	chr10	12877825	12878025	+	-0.224905	0.00632543336152635	mutated MAGGIE motif
chr10:12878020_C_A	chr10	12877920	12878120	+	-0.191873	0.00632543336152635	mutated MAGGIE motif
chr10:12878043_G_A	chr10	12877943	12878143	+	-0.191706	0.00632543336152635	mutated MAGGIE motif
chr10:130017939_G_A	chr10	130017839	130018039	+	0.192492	0.0413300655996076	mutated MAGGIE motif
chr10:130019626_C_T	chr10	130019526	130019726	+	0.1926859999999999	0.0413300655996076	mutated MAGGIE motif
chr10:130836867_G_<	chr10	130836767	130836967	+	-0.171062	0.00767456012420454	mutated MAGGIE motif
chr10:134406401_A_G	chr10	134406301	134406501	+	-0.18255	0.0322588781956593	mutated MAGGIE motif
chr10:134406650_T_C	chr10	134406550	134406750	+	-0.17670399999999994	0.0322588781956593	mutated MAGGIE motif
chr10:134406839_G_A	chr10	134406739	134406939	+	-0.17660499999999998	0.0322588781956593	mutated MAGGIE motif
chr10:134406992_T_C	chr10	134406892	134407092	+	-0.182768	0.0322588781956593	mutated MAGGIE motif
chr10:134407237_A_T	chr10	134407137	134407337	+	-0.17630800000000002	0.0322588781956593	mutated MAGGIE motif
chr10:134407255_A_AT	chr10	134407155	134407355	+	-0.17630800000000002	0.0322588781956593	mutated MAGGIE motif
chr10:134407750_G_A	chr10	134407650	134407850	+	-0.191843	0.0322588781956593	mutated MAGGIE motif
chr10:13723773_G_A	chr10	13723673	13723873	+	-0.164192	0.000723141776315292	mutated MAGGIE motif
chr10:13724331_C_T	chr10	13724231	13724431	+	0.104028	0.00180177781285283	mutated MAGGIE motif
chr10:13724661_C_T	chr10	13724561	13724761	+	-0.15389899999999995	7.46154279695984e-05	mutated MAGGIE motif
chr10:13725688_G_C	chr10	13725588	13725788	+	0.114444	0.000723141776315292	mutated MAGGIE motif
chr10:13727937_C_T	chr10	13727837	13728037	+	0.08537799999999995	0.0305784199735989	mutated MAGGIE motif
chr10:13760975_G_A	chr10	13760875	13761075	+	-0.10851900000000003	0.0455908478055959	mutated MAGGIE motif
chr10:13854618_G_A	chr10	13854518	13854718	+	0.070971	0.0383556348992282	mutated MAGGIE motif
chr10:13856099_T_C	chr10	13855999	13856199	+	0.09201400000000004	0.009633550756497059	mutated MAGGIE motif
chr10:13856456_G_A	chr10	13856356	13856556	+	0.09213900000000007	0.009633550756497059	mutated MAGGIE motif
chr10:13856793_T_C	chr10	13856693	13856893	+	-0.10565000000000002	0.00314764524402279	mutated MAGGIE motif
chr10:13858221_G_A	chr10	13858121	13858321	+	0.08001599999999998	0.0209627387483886	mutated MAGGIE motif
chr10:13858510_T_C	chr10	13858410	13858610	+	0.07198900000000008	0.0383556348992282	mutated MAGGIE motif
chr10:13858979_G_A	chr10	13858879	13859079	+	0.07201099999999994	0.0383556348992282	mutated MAGGIE motif
chr10:13859410_T_C	chr10	13859310	13859510	+	-0.113811	0.00215607110879934	mutated MAGGIE motif
chr10:13903131_C_T	chr10	13903031	13903231	+	-0.13566999999999996	0.00897292488584643	mutated MAGGIE motif
chr10:13904451_T_C	chr10	13904351	13904551	+	-0.13580699999999998	0.00897292488584643	mutated MAGGIE motif
chr10:13904964_TC_T	chr10	13904864	13905064	+	-0.135909	0.00897292488584643	mutated MAGGIE motif
chr10:14026870_G_C	chr10	14026770	14026970	+	0.057274999999999965	0.0065026895783069204	mutated MAGGIE motif
chr10:14028195_A_C	chr10	14028095	14028295	+	0.05692299999999995	0.0065026895783069204	mutated MAGGIE motif
chr10:14028489_A_G	chr10	14028389	14028589	+	0.06007399999999996	0.0065026895783069204	mutated MAGGIE motif
chr10:14029682_G_A	chr10	14029582	14029782	+	0.059945000000000026	0.0065026895783069204	mutated MAGGIE motif
chr10:14029701_G_A	chr10	14029601	14029801	+	0.06019799999999996	0.0065026895783069204	mutated MAGGIE motif
chr10:14029742_T_C	chr10	14029642	14029842	+	0.05993000000000004	0.0065026895783069204	mutated MAGGIE motif
chr10:14030067_G_A	chr10	14029967	14030167	+	0.05944300000000001	0.0065026895783069204	mutated MAGGIE motif
chr10:14030161_C_T	chr10	14030061	14030261	+	0.057005999999999994	0.00680830278275709	mutated MAGGIE motif
chr10:14030319_T_G	chr10	14030219	14030419	+	0.05698100000000006	0.0065026895783069204	mutated MAGGIE motif
chr10:14031051_T_C	chr10	14030951	14031151	+	0.06006299999999998	0.0065026895783069204	mutated MAGGIE motif
chr10:14031419_C_A	chr10	14031319	14031519	+	0.06007399999999996	0.0065026895783069204	mutated MAGGIE motif
chr10:14031420_A_G	chr10	14031320	14031520	+	0.06007399999999996	0.0065026895783069204	mutated MAGGIE motif
chr10:14031709_G_T	chr10	14031609	14031809	+	0.059939000000000076	0.0065026895783069204	mutated MAGGIE motif
chr10:14032099_T_G	chr10	14031999	14032199	+	0.05576000000000003	0.00943277959948396	mutated MAGGIE motif
chr10:14032115_T_C	chr10	14032015	14032215	+	0.05582399999999999	0.00943277959948396	mutated MAGGIE motif
chr10:14032199_C_T	chr10	14032099	14032299	+	0.05582100000000001	0.00943277959948396	mutated MAGGIE motif
chr10:14035266_G_A	chr10	14035166	14035366	+	-0.062801	0.0065026895783069204	mutated MAGGIE motif
chr10:14047923_C_T	chr10	14047823	14048023	+	-0.118556	3.931569664076879e-08	mutated MAGGIE motif
chr10:14051066_C_A	chr10	14050966	14051166	+	-0.047810999999999985	0.033161916802712	mutated MAGGIE motif
chr10:14051248_A_G	chr10	14051148	14051348	+	-0.044941000000000016	0.033161916802712	mutated MAGGIE motif
chr10:14051526_T_G	chr10	14051426	14051626	+	-0.04494899999999996	0.033161916802712	mutated MAGGIE motif
chr10:14051813_C_CAG	chr10	14051713	14051913	+	0.124382	1.73899509205367e-09	mutated MAGGIE motif
chr10:14052580_T_TG	chr10	14052480	14052680	+	-0.04552299999999998	0.033161916802712	mutated MAGGIE motif
chr10:14052640_A_G	chr10	14052540	14052740	+	-0.044939000000000014	0.033161916802712	mutated MAGGIE motif
chr10:14053253_G_T	chr10	14053153	14053353	+	0.11194499999999996	1.8064187086953398e-11	mutated MAGGIE motif
chr10:14053591_T_C	chr10	14053491	14053691	+	0.111954	1.8064187086953398e-11	mutated MAGGIE motif
chr10:14054106_G_A	chr10	14054006	14054206	+	0.11155000000000004	2.0955756450520806e-11	mutated MAGGIE motif
chr10:14054714_G_A	chr10	14054614	14054814	+	-0.12320599999999997	2.481653625251e-09	mutated MAGGIE motif
chr10:14594025_T_C	chr10	14593925	14594125	+	0.06809100000000001	1.50204693210925e-07	mutated MAGGIE motif
chr10:14595392_A_G	chr10	14595292	14595492	+	-0.08431499999999997	3.6605665825207604e-06	mutated MAGGIE motif
chr10:14596739_C_A	chr10	14596639	14596839	+	-0.07187100000000002	0.00152955712148335	mutated MAGGIE motif
chr10:14597668_A_G	chr10	14597568	14597768	+	-0.05686899999999995	9.29194866716534e-06	mutated MAGGIE motif
chr10:14599229_T_G	chr10	14599129	14599329	+	-0.05699399999999994	9.29194866716534e-06	mutated MAGGIE motif
chr10:14600902_A_G	chr10	14600802	14601002	+	0.06796499999999994	1.50204693210925e-07	mutated MAGGIE motif
chr10:14601208_A_G	chr10	14601108	14601308	+	-0.056925	9.29194866716534e-06	mutated MAGGIE motif
chr10:14601356_C_T	chr10	14601256	14601456	+	0.06800699999999993	1.50204693210925e-07	mutated MAGGIE motif
chr10:14601726_G_A	chr10	14601626	14601826	+	-0.05708000000000003	9.29194866716534e-06	mutated MAGGIE motif
chr10:14602443_C_T	chr10	14602343	14602543	+	0.06804100000000002	1.50204693210925e-07	mutated MAGGIE motif
chr10:14602474_G_T	chr10	14602374	14602574	+	-0.08409499999999998	3.6605665825207604e-06	mutated MAGGIE motif
chr10:14604034_C_T	chr10	14603934	14604134	+	-0.08486899999999997	3.6605665825207604e-06	mutated MAGGIE motif
chr10:14604042_C_A	chr10	14603942	14604142	+	-0.07513700000000001	0.0008824266035200779	mutated MAGGIE motif
chr10:14604264_C_T	chr10	14604164	14604364	+	-0.08457600000000004	3.6605665825207604e-06	mutated MAGGIE motif
chr10:14605573_T_C	chr10	14605473	14605673	+	-0.055743000000000036	1.64539857026823e-05	mutated MAGGIE motif
chr10:14607610_T_C	chr10	14607510	14607710	+	-0.040258000000000016	0.0142837507765662	mutated MAGGIE motif
chr10:14611258_C_T	chr10	14611158	14611358	+	-0.060431999999999986	3.6605665825207604e-06	mutated MAGGIE motif
chr10:14611310_A_C	chr10	14611210	14611410	+	-0.04146099999999997	0.0163251645141462	mutated MAGGIE motif
chr10:14611718_C_T	chr10	14611618	14611818	+	-0.041516000000000004	0.0163251645141462	mutated MAGGIE motif
chr10:14612905_T_C	chr10	14612805	14613005	+	-0.109402	1.49447240352876e-07	mutated MAGGIE motif
chr10:14613041_C_T	chr10	14612941	14613141	+	0.07623599999999997	6.56138848629305e-08	mutated MAGGIE motif
chr10:14613308_T_C	chr10	14613208	14613408	+	0.06616699999999998	3.55616005922101e-06	mutated MAGGIE motif
chr10:14613673_G_C	chr10	14613573	14613773	+	0.06550900000000004	3.6605665825207604e-06	mutated MAGGIE motif
chr10:14614281_C_A	chr10	14614181	14614381	+	0.06292500000000001	7.91888845934109e-06	mutated MAGGIE motif
chr10:14614721_C_T	chr10	14614621	14614821	+	-0.10935	1.49447240352876e-07	mutated MAGGIE motif
chr10:14614982_C_T	chr10	14614882	14615082	+	0.04081199999999996	0.0197498403359205	mutated MAGGIE motif
chr10:14615358_G_T	chr10	14615258	14615458	+	0.07621499999999992	6.56138848629305e-08	mutated MAGGIE motif
chr10:14615644_G_A	chr10	14615544	14615744	+	0.076102	6.56138848629305e-08	mutated MAGGIE motif
chr10:14616693_A_T	chr10	14616593	14616793	+	-0.08437299999999998	3.29393232809245e-05	mutated MAGGIE motif
chr10:14617207_T_C	chr10	14617107	14617307	+	-0.041466	0.0163251645141462	mutated MAGGIE motif
chr10:14618113_T_G	chr10	14618013	14618213	+	0.06457299999999999	2.36125414064436e-06	mutated MAGGIE motif
chr10:14618176_G_A	chr10	14618076	14618276	+	0.03684100000000001	0.0304628185122425	mutated MAGGIE motif
chr10:14618933_C_G	chr10	14618833	14619033	+	-0.07936700000000002	0.00132850541213032	mutated MAGGIE motif
chr10:14619045_T_C	chr10	14618945	14619145	+	-0.07933999999999998	0.00132850541213032	mutated MAGGIE motif
chr10:14619959_A_C	chr10	14619859	14620059	+	0.06348799999999999	3.6605665825207604e-06	mutated MAGGIE motif
chr10:14620822_A_G	chr10	14620722	14620922	+	-0.07226800000000005	4.528149684018461e-07	mutated MAGGIE motif
chr10:14621153_C_T	chr10	14621053	14621253	+	0.07234399999999996	6.56138848629305e-08	mutated MAGGIE motif
chr10:14622594_T_G	chr10	14622494	14622694	+	0.039397000000000015	0.0448755173392211	mutated MAGGIE motif
chr10:14623590_A_G	chr10	14623490	14623690	+	0.05365900000000001	0.000238526414025067	mutated MAGGIE motif
chr10:14630069_G_A	chr10	14629969	14630169	+	-0.04941800000000002	0.0153799063037874	mutated MAGGIE motif
chr10:14633374_G_A	chr10	14633274	14633474	+	0.032129999999999985	0.030641679837798	mutated MAGGIE motif
chr10:14633723_T_C	chr10	14633623	14633823	+	-0.04933500000000002	0.0153799063037874	mutated MAGGIE motif
chr10:14636511_A_G	chr10	14636411	14636611	+	-0.044263	0.0178771282429342	mutated MAGGIE motif
chr10:14637067_CAAGAG_TAAGAG	chr10	14636967	14637167	+	0.053382999999999965	0.00324631731592658	mutated MAGGIE motif
chr10:14637141_T_C	chr10	14637041	14637241	+	-0.043959000000000026	0.018869513783017	mutated MAGGIE motif
chr10:14637313_A_G	chr10	14637213	14637413	+	0.05348699999999995	0.00324631731592658	mutated MAGGIE motif
chr10:14637419_A_T	chr10	14637319	14637519	+	-0.04395299999999997	0.018869513783017	mutated MAGGIE motif
chr10:14638245_T_TC	chr10	14638145	14638345	+	-0.04400100000000001	0.018869513783017	mutated MAGGIE motif
chr10:14820695_C_T	chr10	14820595	14820795	+	-0.15655599999999995	0.0443147440520526	mutated MAGGIE motif
chr10:15237536_C_A	chr10	15237436	15237636	+	-0.07459700000000002	0.00631973100165149	mutated MAGGIE motif
chr10:15238886_C_A	chr10	15238786	15238986	+	0.052497000000000016	0.0309388662214774	mutated MAGGIE motif
chr10:15239043_A_C	chr10	15238943	15239143	+	-0.07951499999999995	0.00187755896945775	mutated MAGGIE motif
chr10:15239498_A_G	chr10	15239398	15239598	+	-0.08168599999999998	0.000312136037501279	mutated MAGGIE motif
chr10:15243570_C_T	chr10	15243470	15243670	+	0.05688900000000008	0.0169996896000167	mutated MAGGIE motif
chr10:15244619_G_C	chr10	15244519	15244719	+	0.059206000000000085	0.0169996896000167	mutated MAGGIE motif
chr10:15245139_G_A	chr10	15245039	15245239	+	0.06394500000000003	0.00861960162190827	mutated MAGGIE motif
chr10:17044695_C_T	chr10	17044595	17044795	+	0.10247099999999998	0.0151925372377332	mutated MAGGIE motif
chr10:17045317_A_T	chr10	17045217	17045417	+	0.10779499999999996	0.0151925372377332	mutated MAGGIE motif
chr10:17047781_G_A	chr10	17047681	17047881	+	0.098723	0.0173985754324419	mutated MAGGIE motif
chr10:17048280_G_A	chr10	17048180	17048380	+	0.09489099999999996	0.0173985754324419	mutated MAGGIE motif
chr10:17048708_C_T	chr10	17048608	17048808	+	0.114255	0.0151925372377332	mutated MAGGIE motif
chr10:17048781_T_TCTAA	chr10	17048681	17048881	+	0.098816	0.0173985754324419	mutated MAGGIE motif
chr10:17049331_G_A	chr10	17049231	17049431	+	0.095113	0.0173985754324419	mutated MAGGIE motif
chr10:17049739_G_A	chr10	17049639	17049839	+	0.09494399999999993	0.0173985754324419	mutated MAGGIE motif
chr10:17050107_G_A	chr10	17050007	17050207	+	0.0949270000000001	0.0173985754324419	mutated MAGGIE motif
chr10:17050482_G_A	chr10	17050382	17050582	+	0.07448199999999994	0.0498272544833585	mutated MAGGIE motif
chr10:17050571_A_G	chr10	17050471	17050671	+	0.074766	0.0498272544833585	mutated MAGGIE motif
chr10:17250200_GATCATGA_G	chr10	17250100	17250300	+	-0.15720100000000006	0.0326579716278194	mutated MAGGIE motif
chr10:17628852_G_T	chr10	17628752	17628952	+	0.17158199999999998	0.00861161530426745	mutated MAGGIE motif
chr10:17628905_C_T	chr10	17628805	17629005	+	0.17169100000000004	0.00861161530426745	mutated MAGGIE motif
chr10:17629088_G_T	chr10	17628988	17629188	+	0.1715770000000001	0.00861161530426745	mutated MAGGIE motif
chr10:17629467_T_C	chr10	17629367	17629567	+	0.171721	0.00861161530426745	mutated MAGGIE motif
chr10:17629765_C_G	chr10	17629665	17629865	+	0.17167500000000002	0.00861161530426745	mutated MAGGIE motif
chr10:22341421_G_A	chr10	22341321	22341521	+	0.16226500000000002	0.0342249396972462	mutated MAGGIE motif
chr10:22341574_C_G	chr10	22341474	22341674	+	0.16218199999999994	0.0342249396972462	mutated MAGGIE motif
chr10:22342032_T_C	chr10	22341932	22342132	+	0.16228599999999993	0.0342249396972462	mutated MAGGIE motif
chr10:24494945_G_A	chr10	24494845	24495045	+	0.11500600000000005	0.00217841176679204	mutated MAGGIE motif
chr10:24495586_A_G	chr10	24495486	24495686	+	0.11463299999999997	0.00213857158403571	mutated MAGGIE motif
chr10:24496662_C_T	chr10	24496562	24496762	+	-0.10743000000000004	0.0024765492926562198	mutated MAGGIE motif
chr10:24497678_T_C	chr10	24497578	24497778	+	-0.122095	0.00168172234430526	mutated MAGGIE motif
chr10:24498403_G_A	chr10	24498303	24498503	+	0.13928399999999996	0.00168172234430526	mutated MAGGIE motif
chr10:24498570_C_G	chr10	24498470	24498670	+	-0.122234	0.00168172234430526	mutated MAGGIE motif
chr10:24499738_G_A	chr10	24499638	24499838	+	0.08845700000000001	0.0116023849681603	mutated MAGGIE motif
chr10:24499740_G_A	chr10	24499640	24499840	+	0.088453	0.0116023849681603	mutated MAGGIE motif
chr10:24499940_A_G	chr10	24499840	24500040	+	0.10201800000000004	0.0024765492926562198	mutated MAGGIE motif
chr10:24500127_G_A	chr10	24500027	24500227	+	0.10083399999999998	0.00271087670235749	mutated MAGGIE motif
chr10:24500469_G_T	chr10	24500369	24500569	+	0.12363800000000005	0.0024765492926562198	mutated MAGGIE motif
chr10:24500653_G_A	chr10	24500553	24500753	+	0.10209599999999996	0.0024765492926562198	mutated MAGGIE motif
chr10:24500777_C_T	chr10	24500677	24500877	+	0.10211800000000004	0.0024765492926562198	mutated MAGGIE motif
chr10:24500832_A_G	chr10	24500732	24500932	+	0.102089	0.0024765492926562198	mutated MAGGIE motif
chr10:24670854_A_G	chr10	24670754	24670954	+	-0.09527600000000004	0.0113004463401992	mutated MAGGIE motif
chr10:24670973_T_C	chr10	24670873	24671073	+	-0.120952	0.0113004463401992	mutated MAGGIE motif
chr10:24671111_G_C	chr10	24671011	24671211	+	-0.12206300000000005	0.0113004463401992	mutated MAGGIE motif
chr10:24671410_A_G	chr10	24671310	24671510	+	-0.095086	0.0113004463401992	mutated MAGGIE motif
chr10:24671540_G_A	chr10	24671440	24671640	+	-0.09420100000000003	0.0113004463401992	mutated MAGGIE motif
chr10:24671578_G_A	chr10	24671478	24671678	+	-0.095173	0.0113004463401992	mutated MAGGIE motif
chr10:24671740_G_T	chr10	24671640	24671840	+	-0.09509	0.0113004463401992	mutated MAGGIE motif
chr10:24671871_C_G	chr10	24671771	24671971	+	-0.09357100000000003	0.0113004463401992	mutated MAGGIE motif
chr10:24673229_A_G	chr10	24673129	24673329	+	-0.095196	0.0113004463401992	mutated MAGGIE motif
chr10:24673435_C_G	chr10	24673335	24673535	+	-0.09522399999999998	0.0113004463401992	mutated MAGGIE motif
chr10:24673497_T_C	chr10	24673397	24673597	+	-0.095007	0.0113004463401992	mutated MAGGIE motif
chr10:24673667_A_G	chr10	24673567	24673767	+	-0.09519699999999998	0.0113004463401992	mutated MAGGIE motif
chr10:24673906_C_T	chr10	24673806	24674006	+	-0.09512800000000003	0.0113004463401992	mutated MAGGIE motif
chr10:24674265_G_A	chr10	24674165	24674365	+	-0.09478799999999997	0.0113004463401992	mutated MAGGIE motif
chr10:27128861_G_A	chr10	27128761	27128961	+	0.218627	0.00120745367510734	mutated MAGGIE motif
chr10:27128878_G_C	chr10	27128778	27128978	+	0.21864399999999995	0.00120745367510734	mutated MAGGIE motif
chr10:27129334_A_G	chr10	27129234	27129434	+	0.218645	0.00120745367510734	mutated MAGGIE motif
chr10:27130441_A_T	chr10	27130341	27130541	+	0.218919	0.00120745367510734	mutated MAGGIE motif
chr10:27130497_A_G	chr10	27130397	27130597	+	0.21876500000000002	0.00120745367510734	mutated MAGGIE motif
chr10:27130625_G_T	chr10	27130525	27130725	+	0.133683	0.0372275216955585	mutated MAGGIE motif
chr10:27130867_G_C	chr10	27130767	27130967	+	0.218623	0.00120745367510734	mutated MAGGIE motif
chr10:27130877_C_CA	chr10	27130777	27130977	+	0.218635	0.00120745367510734	mutated MAGGIE motif
chr10:27131419_G_A	chr10	27131319	27131519	+	0.21876000000000007	0.00120745367510734	mutated MAGGIE motif
chr10:27131556_C_T	chr10	27131456	27131656	+	0.218754	0.00120745367510734	mutated MAGGIE motif
chr10:27131645_A_G	chr10	27131545	27131745	+	0.133733	0.0372275216955585	mutated MAGGIE motif
chr10:27132133_G_A	chr10	27132033	27132233	+	0.21864300000000006	0.00120745367510734	mutated MAGGIE motif
chr10:27443623_C_G	chr10	27443523	27443723	+	0.114765	0.00904791410441277	mutated MAGGIE motif
chr10:27444303_G_A	chr10	27444203	27444403	+	0.10436800000000003	0.00904791410441277	mutated MAGGIE motif
chr10:27444328_C_A	chr10	27444228	27444428	+	0.11470699999999999	0.00904791410441277	mutated MAGGIE motif
chr10:27444344_T_G	chr10	27444244	27444444	+	0.10544600000000004	0.0224805398958271	mutated MAGGIE motif
chr10:27445196_G_T	chr10	27445096	27445296	+	0.132486	0.007632822486746691	mutated MAGGIE motif
chr10:27672403_T_C	chr10	27672303	27672503	+	-0.123653	0.013006030262747	mutated MAGGIE motif
chr10:27672782_A_G	chr10	27672682	27672882	+	-0.12572699999999998	0.013006030262747	mutated MAGGIE motif
chr10:27673128_C_T	chr10	27673028	27673228	+	0.10534100000000003	0.0395004298305142	mutated MAGGIE motif
chr10:27673654_T_C	chr10	27673554	27673754	+	-0.12550999999999998	0.013006030262747	mutated MAGGIE motif
chr10:27673973_G_A	chr10	27673873	27674073	+	-0.125718	0.013006030262747	mutated MAGGIE motif
chr10:28297348_C_A	chr10	28297248	28297448	+	-0.183639	0.0444739291322266	mutated MAGGIE motif
chr10:29420405_C_T	chr10	29420305	29420505	+	0.13315100000000002	0.00141629268052496	mutated MAGGIE motif
chr10:29420552_T_C	chr10	29420452	29420652	+	0.13314499999999996	0.00141629268052496	mutated MAGGIE motif
chr10:29421804_C_A	chr10	29421704	29421904	+	-0.150679	0.000724600444645375	mutated MAGGIE motif
chr10:29421805_C_T	chr10	29421705	29421905	+	-0.150679	0.000724600444645375	mutated MAGGIE motif
chr10:29421807_C_G	chr10	29421707	29421907	+	-0.150679	0.000724600444645375	mutated MAGGIE motif
chr10:29421871_C_G	chr10	29421771	29421971	+	-0.172151	0.000192920344466678	mutated MAGGIE motif
chr10:29421872_T_A	chr10	29421772	29421972	+	-0.17215000000000005	0.000192920344466678	mutated MAGGIE motif
chr10:29422212_T_C	chr10	29422112	29422312	+	0.15796599999999994	0.000724600444645375	mutated MAGGIE motif
chr10:29843161_C_G	chr10	29843061	29843261	+	0.15259100000000006	0.00306586765404554	mutated MAGGIE motif
chr10:29843458_T_C	chr10	29843358	29843558	+	0.15915900000000005	0.00306586765404554	mutated MAGGIE motif
chr10:29843582_C_T	chr10	29843482	29843682	+	0.15847600000000006	0.00306586765404554	mutated MAGGIE motif
chr10:29843833_C_T	chr10	29843733	29843933	+	0.13436499999999996	0.0121408295662494	mutated MAGGIE motif
chr10:29844274_T_C	chr10	29844174	29844374	+	0.2089850000000001	0.000667051796890818	mutated MAGGIE motif
chr10:29844588_C_A	chr10	29844488	29844688	+	0.15741800000000006	0.00306586765404554	mutated MAGGIE motif
chr10:29844589_G_A	chr10	29844489	29844689	+	0.15739199999999998	0.00306586765404554	mutated MAGGIE motif
chr10:29844736_C_T	chr10	29844636	29844836	+	0.10868399999999999	0.0458390540388009	mutated MAGGIE motif
chr10:29845892_T_C	chr10	29845792	29845992	+	0.17549799999999993	0.00239034437987705	mutated MAGGIE motif
chr10:29846061_G_A	chr10	29845961	29846161	+	0.15908299999999995	0.00306586765404554	mutated MAGGIE motif
chr10:29846198_G_A	chr10	29846098	29846298	+	0.15853000000000006	0.00306586765404554	mutated MAGGIE motif
chr10:29846388_A_T	chr10	29846288	29846488	+	0.22549200000000005	0.00021048706751055702	mutated MAGGIE motif
chr10:29847249_A_G	chr10	29847149	29847349	+	0.15805800000000006	0.00306586765404554	mutated MAGGIE motif
chr10:29870686_A_G	chr10	29870586	29870786	+	0.28039899999999995	1.13951687187547e-07	mutated MAGGIE motif
chr10:29870757_G_T	chr10	29870657	29870857	+	0.17000000000000004	0.0258741161331115	mutated MAGGIE motif
chr10:29871564_G_C	chr10	29871464	29871664	+	0.154841	0.00978908384450155	mutated MAGGIE motif
chr10:29871949_G_A	chr10	29871849	29872049	+	0.292095	9.47626016266246e-08	mutated MAGGIE motif
chr10:29872878_T_C	chr10	29872778	29872978	+	0.2883180000000001	9.47626016266246e-08	mutated MAGGIE motif
chr10:29956038_C_T	chr10	29955938	29956138	+	0.12036300000000001	0.031933602498544	mutated MAGGIE motif
chr10:29956047_C_A	chr10	29955947	29956147	+	0.12027299999999995	0.031933602498544	mutated MAGGIE motif
chr10:29956221_A_G	chr10	29956121	29956321	+	0.12028800000000005	0.031933602498544	mutated MAGGIE motif
chr10:29958585_C_G	chr10	29958485	29958685	+	0.12029999999999995	0.031933602498544	mutated MAGGIE motif
chr10:29992684_C_T	chr10	29992584	29992784	+	0.14136899999999994	0.0446354449899547	mutated MAGGIE motif
chr10:3089339_T_C	chr10	3089239	3089439	+	0.127676	0.0303141751597469	mutated MAGGIE motif
chr10:3089363_A_G	chr10	3089263	3089463	+	0.141528	0.0244341691480683	mutated MAGGIE motif
chr10:3089414_G_A	chr10	3089314	3089514	+	0.12737500000000002	0.0303141751597469	mutated MAGGIE motif
chr10:3090787_A_G	chr10	3090687	3090887	+	0.11848999999999997	0.0264906242291574	mutated MAGGIE motif
chr10:3090810_C_T	chr10	3090710	3090910	+	0.11848999999999997	0.0264906242291574	mutated MAGGIE motif
chr10:3091062_G_C	chr10	3090962	3091162	+	0.127896	0.0458901416244266	mutated MAGGIE motif
chr10:3091134_G_C	chr10	3091034	3091234	+	-0.130732	0.0458901416244266	mutated MAGGIE motif
chr10:3091504_A_G	chr10	3091404	3091604	+	0.131564	0.0303141751597469	mutated MAGGIE motif
chr10:30928944_C_T	chr10	30928844	30929044	+	0.060212000000000036	0.014291425980175	mutated MAGGIE motif
chr10:30931628_A_ACCGTGCCCGACAGGCGTGAG	chr10	30931528	30931728	+	-0.052453999999999994	0.0450619451285635	mutated MAGGIE motif
chr10:30932635_C_T	chr10	30932535	30932735	+	0.05336300000000005	0.0173101635859229	mutated MAGGIE motif
chr10:30932854_C_T	chr10	30932754	30932954	+	0.057904999999999984	0.014291425980175	mutated MAGGIE motif
chr10:30933569_T_C	chr10	30933469	30933669	+	-0.07603599999999999	0.014291425980175	mutated MAGGIE motif
chr10:30933724_C_A	chr10	30933624	30933824	+	0.057672000000000063	0.014291425980175	mutated MAGGIE motif
chr10:30933869_T_A	chr10	30933769	30933969	+	0.050297000000000036	0.0269921301922182	mutated MAGGIE motif
chr10:30934694_C_T	chr10	30934594	30934794	+	-0.08227700000000003	0.014291425980175	mutated MAGGIE motif
chr10:30935686_T_C	chr10	30935586	30935786	+	0.05570200000000003	0.0279977666856485	mutated MAGGIE motif
chr10:30935689_C_G	chr10	30935589	30935789	+	0.05570200000000003	0.0279977666856485	mutated MAGGIE motif
chr10:30935690_A_G	chr10	30935590	30935790	+	0.05570200000000003	0.0279977666856485	mutated MAGGIE motif
chr10:30935703_A_T	chr10	30935603	30935803	+	0.055731000000000086	0.0279977666856485	mutated MAGGIE motif
chr10:30935981_T_C	chr10	30935881	30936081	+	0.053377999999999926	0.0173101635859229	mutated MAGGIE motif
chr10:30936214_A_C	chr10	30936114	30936314	+	-0.07361699999999999	0.0173101635859229	mutated MAGGIE motif
chr10:30936343_GT_G	chr10	30936243	30936443	+	0.044697999999999904	0.0426562508587473	mutated MAGGIE motif
chr10:30937956_G_A	chr10	30937856	30938056	+	0.047738000000000065	0.0311251974957549	mutated MAGGIE motif
chr10:31318750_G_A	chr10	31318650	31318850	+	-0.07645200000000002	0.0128651672853487	mutated MAGGIE motif
chr10:31319053_A_C	chr10	31318953	31319153	+	-0.07313100000000006	0.0128651672853487	mutated MAGGIE motif
chr10:31321134_G_C	chr10	31321034	31321234	+	0.04625800000000002	0.0316611296887975	mutated MAGGIE motif
chr10:31322155_T_C	chr10	31322055	31322255	+	0.04597799999999996	0.0316611296887975	mutated MAGGIE motif
chr10:31323223_G_A	chr10	31323123	31323323	+	0.052231000000000034	0.0164137782570968	mutated MAGGIE motif
chr10:31323380_C_T	chr10	31323280	31323480	+	-0.07646499999999995	0.0128651672853487	mutated MAGGIE motif
chr10:3178308_G_T	chr10	3178208	3178408	+	-0.27010700000000004	1.5969844551865599e-07	mutated MAGGIE motif
chr10:3178383_G_T	chr10	3178283	3178483	+	-0.302161	3.5120411781432795e-08	mutated MAGGIE motif
chr10:3178433_G_A	chr10	3178333	3178533	+	0.282003	1.04283552349624e-08	mutated MAGGIE motif
chr10:3178815_G_C	chr10	3178715	3178915	+	-0.324762	1.5969844551865599e-07	mutated MAGGIE motif
chr10:3178881_C_T	chr10	3178781	3178981	+	0.2819229999999999	1.04283552349624e-08	mutated MAGGIE motif
chr10:3178908_T_C	chr10	3178808	3179008	+	-0.326024	1.03195875263799e-08	mutated MAGGIE motif
chr10:3178915_C_T	chr10	3178815	3179015	+	0.281992	1.04283552349624e-08	mutated MAGGIE motif
chr10:3178986_T_C	chr10	3178886	3179086	+	-0.269633	1.5969844551865599e-07	mutated MAGGIE motif
chr10:3178987_G_A	chr10	3178887	3179087	+	-0.269831	1.5969844551865599e-07	mutated MAGGIE motif
chr10:3179079_AAAGATTAGCAAAATATTTTTATAGGGATCACTG_A	chr10	3178979	3179179	+	-0.326175	1.03195875263799e-08	mutated MAGGIE motif
chr10:3179189_A_G	chr10	3179089	3179289	+	-0.326237	1.03195875263799e-08	mutated MAGGIE motif
chr10:3179446_C_G	chr10	3179346	3179546	+	-0.279589	8.87095628090749e-08	mutated MAGGIE motif
chr10:3179703_C_T	chr10	3179603	3179803	+	-0.270077	1.5969844551865599e-07	mutated MAGGIE motif
chr10:3179708_A_G	chr10	3179608	3179808	+	-0.270114	1.5969844551865599e-07	mutated MAGGIE motif
chr10:31996899_G_T	chr10	31996799	31996999	+	-0.116359	0.0017243946183594	mutated MAGGIE motif
chr10:31997371_A_G	chr10	31997271	31997471	+	0.144034	0.0008384401741344849	mutated MAGGIE motif
chr10:31997400_G_T	chr10	31997300	31997500	+	0.14401300000000006	0.0008384401741344849	mutated MAGGIE motif
chr10:31997937_C_T	chr10	31997837	31998037	+	0.144459	0.0008384401741344849	mutated MAGGIE motif
chr10:31997983_G_C	chr10	31997883	31998083	+	0.123521	0.0008384401741344849	mutated MAGGIE motif
chr10:31998017_A_G	chr10	31997917	31998117	+	0.11200699999999997	0.0017243946183594	mutated MAGGIE motif
chr10:31998573_C_T	chr10	31998473	31998673	+	0.10087999999999996	0.00419474956516275	mutated MAGGIE motif
chr10:32340472_T_G	chr10	32340372	32340572	+	0.13421400000000006	0.023213892464831	mutated MAGGIE motif
chr10:32344158_C_T	chr10	32344058	32344258	+	0.13419399999999992	0.023213892464831	mutated MAGGIE motif
chr10:32344747_G_A	chr10	32344647	32344847	+	0.13420600000000005	0.023213892464831	mutated MAGGIE motif
chr10:32345736_C_G	chr10	32345636	32345836	+	0.14168800000000004	0.0059576314354945	mutated MAGGIE motif
chr10:32654988_G_A	chr10	32654888	32655088	+	0.12457299999999992	0.0303155743175348	mutated MAGGIE motif
chr10:33165422_G_A	chr10	33165322	33165522	+	0.2288520000000001	0.00503576116037628	mutated MAGGIE motif
chr10:36741255_A_G	chr10	36741155	36741355	+	-0.17449800000000001	0.0099882209353189	mutated MAGGIE motif
chr10:36742014_C_G	chr10	36741914	36742114	+	-0.187679	0.009583775115728721	mutated MAGGIE motif
chr10:3848340_A_G	chr10	3848240	3848440	+	0.061876000000000035	0.000546695848553127	mutated MAGGIE motif
chr10:3848995_A_C	chr10	3848895	3849095	+	-0.06231499999999995	0.040780390553772985	mutated MAGGIE motif
chr10:3849241_C_A	chr10	3849141	3849341	+	0.107927	7.30477603210821e-07	mutated MAGGIE motif
chr10:3850303_G_T	chr10	3850203	3850403	+	0.10917	8.37003876520218e-07	mutated MAGGIE motif
chr10:3850780_C_T	chr10	3850680	3850880	+	0.10381700000000003	8.707214397255029e-07	mutated MAGGIE motif
chr10:3851115_G_C	chr10	3851015	3851215	+	-0.06328699999999997	0.00576424827801056	mutated MAGGIE motif
chr10:3853031_A_G	chr10	3852931	3853131	+	-0.06822899999999997	0.0029814733091990397	mutated MAGGIE motif
chr10:3854581_C_A	chr10	3854481	3854681	+	0.06135900000000005	0.0164588593816604	mutated MAGGIE motif
chr10:3854724_G_A	chr10	3854624	3854824	+	0.060622999999999976	0.0164588593816604	mutated MAGGIE motif
chr10:3918174_T_G	chr10	3918074	3918274	+	0.109278	0.000102703321825559	mutated MAGGIE motif
chr10:3918640_T_C	chr10	3918540	3918740	+	-0.08823500000000006	0.00822102002550005	mutated MAGGIE motif
chr10:3919001_C_T	chr10	3918901	3919101	+	0.17188699999999998	5.49097625039228e-10	mutated MAGGIE motif
chr10:3919081_G_A	chr10	3918981	3919181	+	0.17002299999999992	6.84008185914538e-10	mutated MAGGIE motif
chr10:3919243_G_C	chr10	3919143	3919343	+	-0.08805600000000002	0.00822102002550005	mutated MAGGIE motif
chr10:3919765_T_C	chr10	3919665	3919865	+	0.17174100000000006	5.49097625039228e-10	mutated MAGGIE motif
chr10:3964990_G_A	chr10	3964890	3965090	+	-0.204118	1.1888694320144899e-27	mutated MAGGIE motif
chr10:3965284_G_A	chr10	3965184	3965384	+	-0.20410500000000004	1.1888694320144899e-27	mutated MAGGIE motif
chr10:3965302_C_T	chr10	3965202	3965402	+	-0.20410700000000004	1.1888694320144899e-27	mutated MAGGIE motif
chr10:3965342_C_G	chr10	3965242	3965442	+	-0.20408099999999998	1.1888694320144899e-27	mutated MAGGIE motif
chr10:3965527_T_C	chr10	3965427	3965627	+	-0.204093	1.1888694320144899e-27	mutated MAGGIE motif
chr10:3965700_T_A	chr10	3965600	3965800	+	-0.20410900000000004	1.1888694320144899e-27	mutated MAGGIE motif
chr10:3965722_T_C	chr10	3965622	3965822	+	-0.20411300000000002	1.1888694320144899e-27	mutated MAGGIE motif
chr10:3965873_A_ATTTATTTC	chr10	3965773	3965973	+	-0.20410500000000004	1.1888694320144899e-27	mutated MAGGIE motif
chr10:3966099_C_A	chr10	3965999	3966199	+	-0.204096	1.1888694320144899e-27	mutated MAGGIE motif
chr10:3966168_G_A	chr10	3966068	3966268	+	0.15549199999999996	6.294061621167699e-10	mutated MAGGIE motif
chr10:3966204_A_C	chr10	3966104	3966304	+	-0.204071	1.1888694320144899e-27	mutated MAGGIE motif
chr10:3966519_G_C	chr10	3966419	3966619	+	-0.204085	1.1888694320144899e-27	mutated MAGGIE motif
chr10:3966869_A_G	chr10	3966769	3966969	+	-0.204125	1.1888694320144899e-27	mutated MAGGIE motif
chr10:3967206_C_A	chr10	3967106	3967306	+	-0.204124	1.1888694320144899e-27	mutated MAGGIE motif
chr10:3968152_C_G	chr10	3968052	3968252	+	-0.204091	1.1888694320144899e-27	mutated MAGGIE motif
chr10:3968210_C_T	chr10	3968110	3968310	+	0.193217	9.444865160449099e-21	mutated MAGGIE motif
chr10:3968427_G_A	chr10	3968327	3968527	+	-0.204089	1.1888694320144899e-27	mutated MAGGIE motif
chr10:3968438_A_G	chr10	3968338	3968538	+	0.19322999999999999	9.124096367715207e-21	mutated MAGGIE motif
chr10:3968443_G_C	chr10	3968343	3968543	+	-0.204094	1.1888694320144899e-27	mutated MAGGIE motif
chr10:3968654_C_T	chr10	3968554	3968754	+	-0.204237	1.1888694320144899e-27	mutated MAGGIE motif
chr10:3968713_A_C	chr10	3968613	3968813	+	-0.20411500000000002	1.1888694320144899e-27	mutated MAGGIE motif
chr10:3968877_T_C	chr10	3968777	3968977	+	0.19321199999999994	9.124096367715207e-21	mutated MAGGIE motif
chr10:3969047_G_A	chr10	3968947	3969147	+	-0.20410300000000006	1.1888694320144899e-27	mutated MAGGIE motif
chr10:3969235_C_T	chr10	3969135	3969335	+	-0.20410599999999998	1.1888694320144899e-27	mutated MAGGIE motif
chr10:3969587_A_G	chr10	3969487	3969687	+	-0.20415900000000006	1.1888694320144899e-27	mutated MAGGIE motif
chr10:3969648_C_T	chr10	3969548	3969748	+	-0.204116	1.1888694320144899e-27	mutated MAGGIE motif
chr10:3969708_T_C	chr10	3969608	3969808	+	-0.204104	1.1888694320144899e-27	mutated MAGGIE motif
chr10:3969947_T_C	chr10	3969847	3970047	+	-0.20410500000000004	1.1888694320144899e-27	mutated MAGGIE motif
chr10:3969963_C_T	chr10	3969863	3970063	+	-0.20410700000000004	1.1888694320144899e-27	mutated MAGGIE motif
chr10:3970062_C_T	chr10	3969962	3970162	+	-0.204098	1.1888694320144899e-27	mutated MAGGIE motif
chr10:3970483_G_T	chr10	3970383	3970583	+	0.19324700000000009	9.124096367715207e-21	mutated MAGGIE motif
chr10:3970778_C_T	chr10	3970678	3970878	+	-0.192996	5.22240733962369e-26	mutated MAGGIE motif
chr10:3971037_G_C	chr10	3970937	3971137	+	0.19325900000000007	9.124096367715207e-21	mutated MAGGIE motif
chr10:3971046_C_T	chr10	3970946	3971146	+	-0.184841	4.3497173451899285e-22	mutated MAGGIE motif
chr10:3971047_A_C	chr10	3970947	3971147	+	0.193244	9.124096367715207e-21	mutated MAGGIE motif
chr10:3971222_C_T	chr10	3971122	3971322	+	0.193225	9.124096367715207e-21	mutated MAGGIE motif
chr10:3971367_T_C	chr10	3971267	3971467	+	0.19321199999999994	9.124096367715207e-21	mutated MAGGIE motif
chr10:3971439_G_A	chr10	3971339	3971539	+	0.19325000000000006	9.124096367715207e-21	mutated MAGGIE motif
chr10:3971588_C_T	chr10	3971488	3971688	+	0.193206	9.124096367715207e-21	mutated MAGGIE motif
chr10:3971739_G_T	chr10	3971639	3971839	+	0.19326999999999994	9.124096367715207e-21	mutated MAGGIE motif
chr10:3971879_C_T	chr10	3971779	3971979	+	0.19327700000000006	9.124096367715207e-21	mutated MAGGIE motif
chr10:3971991_G_A	chr10	3971891	3972091	+	0.19328	9.124096367715207e-21	mutated MAGGIE motif
chr10:3972077_T_C	chr10	3971977	3972177	+	0.193183	9.124096367715207e-21	mutated MAGGIE motif
chr10:3972090_G_A	chr10	3971990	3972190	+	0.193187	9.124096367715207e-21	mutated MAGGIE motif
chr10:3972277_T_C	chr10	3972177	3972377	+	0.19318900000000008	9.124096367715207e-21	mutated MAGGIE motif
chr10:3972524_C_T	chr10	3972424	3972624	+	0.19096800000000005	1.34684207073309e-14	mutated MAGGIE motif
chr10:3972661_C_T	chr10	3972561	3972761	+	0.191044	1.32021411142181e-14	mutated MAGGIE motif
chr10:3972665_C_G	chr10	3972565	3972765	+	0.191044	1.32021411142181e-14	mutated MAGGIE motif
chr10:3972707_T_C	chr10	3972607	3972807	+	0.19104600000000005	1.32021411142181e-14	mutated MAGGIE motif
chr10:3972952_A_G	chr10	3972852	3973052	+	0.18691099999999994	1.1579477852154698e-14	mutated MAGGIE motif
chr10:3973378_G_A	chr10	3973278	3973478	+	0.128749	6.07692010511808e-05	mutated MAGGIE motif
chr10:3974305_G_A	chr10	3974205	3974405	+	0.12853400000000004	6.07692010511808e-05	mutated MAGGIE motif
chr10:3974453_C_T	chr10	3974353	3974553	+	0.12893599999999994	5.92661545761925e-05	mutated MAGGIE motif
chr10:45063631_C_T	chr10	45063531	45063731	+	-0.124263	0.0027244768365974397	mutated MAGGIE motif
chr10:45064423_C_A	chr10	45064323	45064523	+	-0.080175	0.0217007143246479	mutated MAGGIE motif
chr10:45064723_C_T	chr10	45064623	45064823	+	-0.12436599999999998	0.0027244768365974397	mutated MAGGIE motif
chr10:45064764_C_T	chr10	45064664	45064864	+	-0.12417	0.0027244768365974397	mutated MAGGIE motif
chr10:45064837_C_G	chr10	45064737	45064937	+	-0.124645	0.0027244768365974397	mutated MAGGIE motif
chr10:45064840_A_G	chr10	45064740	45064940	+	-0.12460300000000002	0.0027244768365974397	mutated MAGGIE motif
chr10:45064931_C_T	chr10	45064831	45065031	+	-0.12419999999999998	0.0027244768365974397	mutated MAGGIE motif
chr10:45065405_G_A	chr10	45065305	45065505	+	-0.12220799999999997	0.0027244768365974397	mutated MAGGIE motif
chr10:45065440_C_T	chr10	45065340	45065540	+	-0.07486700000000003	0.027538116139569	mutated MAGGIE motif
chr10:45066006_G_A	chr10	45065906	45066106	+	-0.100615	0.0204223865003868	mutated MAGGIE motif
chr10:45066120_G_A	chr10	45066020	45066220	+	-0.124266	0.0027244768365974397	mutated MAGGIE motif
chr10:45066526_A_G	chr10	45066426	45066626	+	-0.12428399999999999	0.0027244768365974397	mutated MAGGIE motif
chr10:45297529_C_T	chr10	45297429	45297629	+	-0.14982299999999998	0.0258344653705886	mutated MAGGIE motif
chr10:4899339_C_T	chr10	4899239	4899439	+	0.1958	0.00946516662071402	mutated MAGGIE motif
chr10:4899524_A_G	chr10	4899424	4899624	+	0.19294100000000006	0.00946516662071402	mutated MAGGIE motif
chr10:4899590_A_AC	chr10	4899490	4899690	+	0.194902	0.00946516662071402	mutated MAGGIE motif
chr10:4899686_A_C	chr10	4899586	4899786	+	0.196527	0.00946516662071402	mutated MAGGIE motif
chr10:4900138_A_G	chr10	4900038	4900238	+	0.19384099999999996	0.00946516662071402	mutated MAGGIE motif
chr10:4900320_T_C	chr10	4900220	4900420	+	0.19363599999999992	0.00946516662071402	mutated MAGGIE motif
chr10:4901156_C_T	chr10	4901056	4901256	+	0.194902	0.00946516662071402	mutated MAGGIE motif
chr10:4901798_G_T	chr10	4901698	4901898	+	0.192688	0.00946516662071402	mutated MAGGIE motif
chr10:4901835_G_A	chr10	4901735	4901935	+	0.192873	0.00946516662071402	mutated MAGGIE motif
chr10:4901931_G_A	chr10	4901831	4902031	+	0.192708	0.00946516662071402	mutated MAGGIE motif
chr10:4907984_T_C	chr10	4907884	4908084	+	0.10856899999999993	0.00400843967713043	mutated MAGGIE motif
chr10:4908624_C_T	chr10	4908524	4908724	+	0.108475	0.00400843967713043	mutated MAGGIE motif
chr10:4908655_T_G	chr10	4908555	4908755	+	-0.07768100000000007	0.00983783139588704	mutated MAGGIE motif
chr10:4908745_C_T	chr10	4908645	4908845	+	0.10851099999999993	0.00400843967713043	mutated MAGGIE motif
chr10:4908818_G_A	chr10	4908718	4908918	+	0.10831700000000001	0.00400843967713043	mutated MAGGIE motif
chr10:4908929_A_T	chr10	4908829	4909029	+	0.10870900000000006	0.00400843967713043	mutated MAGGIE motif
chr10:4909074_A_T	chr10	4908974	4909174	+	0.10848699999999999	0.00400843967713043	mutated MAGGIE motif
chr10:4909113_A_G	chr10	4909013	4909213	+	0.108479	0.00400843967713043	mutated MAGGIE motif
chr10:4909149_G_A	chr10	4909049	4909249	+	0.10861299999999996	0.00400843967713043	mutated MAGGIE motif
chr10:4909353_A_G	chr10	4909253	4909453	+	0.10853100000000004	0.00400843967713043	mutated MAGGIE motif
chr10:4909401_T_C	chr10	4909301	4909501	+	0.10853000000000003	0.00400843967713043	mutated MAGGIE motif
chr10:4909547_C_T	chr10	4909447	4909647	+	0.10842299999999994	0.00400843967713043	mutated MAGGIE motif
chr10:4909968_T_C	chr10	4909868	4910068	+	-0.121384	0.000224982936793214	mutated MAGGIE motif
chr10:4910028_C_A	chr10	4909928	4910128	+	0.10828100000000007	0.00400843967713043	mutated MAGGIE motif
chr10:4910219_G_A	chr10	4910119	4910319	+	0.108348	0.00400843967713043	mutated MAGGIE motif
chr10:4910493_C_A	chr10	4910393	4910593	+	0.10831400000000002	0.00400843967713043	mutated MAGGIE motif
chr10:4910690_G_A	chr10	4910590	4910790	+	0.108035	0.00400843967713043	mutated MAGGIE motif
chr10:50155130_C_T	chr10	50155030	50155230	+	-0.11704599999999997	0.00574104064149905	mutated MAGGIE motif
chr10:50155369_T_C	chr10	50155269	50155469	+	0.094982	0.0101722513012201	mutated MAGGIE motif
chr10:50391910_A_G	chr10	50391810	50392010	+	0.165103	0.007530077045588421	mutated MAGGIE motif
chr10:50392254_C_T	chr10	50392154	50392354	+	0.16514500000000001	0.007530077045588421	mutated MAGGIE motif
chr10:50742353_T_C	chr10	50742253	50742453	+	0.08190799999999998	0.0167482124595731	mutated MAGGIE motif
chr10:50742453_A_G	chr10	50742353	50742553	+	0.06126799999999999	0.041758880144876	mutated MAGGIE motif
chr10:50742892_A_G	chr10	50742792	50742992	+	-0.08553500000000003	0.0167482124595731	mutated MAGGIE motif
chr10:5074975_G_A	chr10	5074875	5075075	+	0.17647100000000004	0.00696490423654549	mutated MAGGIE motif
chr10:5075014_C_T	chr10	5074914	5075114	+	-0.27408000000000005	1.97873647999367e-05	mutated MAGGIE motif
chr10:5075121_C_G	chr10	5075021	5075221	+	-0.292817	1.97873647999367e-05	mutated MAGGIE motif
chr10:5075724_T_A	chr10	5075624	5075824	+	-0.308821	4.4084231891857596e-06	mutated MAGGIE motif
chr10:5075827_G_T	chr10	5075727	5075927	+	0.17640200000000006	0.00696490423654549	mutated MAGGIE motif
chr10:5076063_G_A	chr10	5075963	5076163	+	-0.308821	4.4084231891857596e-06	mutated MAGGIE motif
chr10:5076450_T_C	chr10	5076350	5076550	+	0.17625200000000008	0.00696490423654549	mutated MAGGIE motif
chr10:5076585_G_A	chr10	5076485	5076685	+	0.17638800000000002	0.00696490423654549	mutated MAGGIE motif
chr10:5136148_A_G	chr10	5136048	5136248	+	0.082565	0.0308983093099041	mutated MAGGIE motif
chr10:5136651_C_G	chr10	5136551	5136751	+	0.08811400000000003	0.0282023106462226	mutated MAGGIE motif
chr10:5137601_G_A	chr10	5137501	5137701	+	-0.08545900000000001	0.041941217217361	mutated MAGGIE motif
chr10:5138607_G_A	chr10	5138507	5138707	+	-0.07773000000000002	0.041941217217361	mutated MAGGIE motif
chr10:5147909_G_A	chr10	5147809	5148009	+	-0.246311	6.12484556005506e-06	mutated MAGGIE motif
chr10:5148387_T_C	chr10	5148287	5148487	+	0.28149099999999994	3.1826680823959705e-08	mutated MAGGIE motif
chr10:5148453_C_T	chr10	5148353	5148553	+	0.293774	3.1826680823959705e-08	mutated MAGGIE motif
chr10:5148669_G_A	chr10	5148569	5148769	+	0.26354500000000003	3.09377049631418e-07	mutated MAGGIE motif
chr10:5148766_A_C	chr10	5148666	5148866	+	0.281536	3.1826680823959705e-08	mutated MAGGIE motif
chr10:5149105_TA_T	chr10	5149005	5149205	+	0.281536	3.1826680823959705e-08	mutated MAGGIE motif
chr10:5149106_A_AAAT	chr10	5149006	5149206	+	-0.281536	3.1826680823959705e-08	mutated MAGGIE motif
chr10:5149303_T_C	chr10	5149203	5149403	+	-0.225035	0.000415597437298333	mutated MAGGIE motif
chr10:5149330_A_G	chr10	5149230	5149430	+	0.281455	3.1826680823959705e-08	mutated MAGGIE motif
chr10:5149413_T_C	chr10	5149313	5149513	+	-0.225092	0.000415597437298333	mutated MAGGIE motif
chr10:5149427_TTG_CTG	chr10	5149327	5149527	+	-0.225019	0.000415597437298333	mutated MAGGIE motif
chr10:5149703_G_A	chr10	5149603	5149803	+	-0.247448	5.92941306813874e-06	mutated MAGGIE motif
chr10:5150019_T_TGTAA	chr10	5149919	5150119	+	-0.226365	0.000415597437298333	mutated MAGGIE motif
chr10:52363203_T_A	chr10	52363103	52363303	+	-0.20465300000000006	0.000417229943643921	mutated MAGGIE motif
chr10:52363705_C_T	chr10	52363605	52363805	+	-0.193889	0.000417229943643921	mutated MAGGIE motif
chr10:52364273_C_T	chr10	52364173	52364373	+	-0.184238	0.00239051043330457	mutated MAGGIE motif
chr10:52364496_C_T	chr10	52364396	52364596	+	-0.204748	0.000417229943643921	mutated MAGGIE motif
chr10:52364614_GAAATAT_G	chr10	52364514	52364714	+	-0.204639	0.000417229943643921	mutated MAGGIE motif
chr10:52364756_G_A	chr10	52364656	52364856	+	-0.193882	0.000417229943643921	mutated MAGGIE motif
chr10:52365541_C_G	chr10	52365441	52365641	+	-0.107902	0.0422128083765938	mutated MAGGIE motif
chr10:52365860_A_C	chr10	52365760	52365960	+	-0.14476300000000006	0.0065493630215542895	mutated MAGGIE motif
chr10:53232108_G_A	chr10	53232008	53232208	+	-0.18650799999999998	0.0268584860648996	mutated MAGGIE motif
chr10:53678103_T_A	chr10	53678003	53678203	+	-0.214516	0.000118990286526751	mutated MAGGIE motif
chr10:53678104_A_T	chr10	53678004	53678204	+	-0.214516	0.000118990286526751	mutated MAGGIE motif
chr10:53678344_G_A	chr10	53678244	53678444	+	-0.180056	0.00120388991284126	mutated MAGGIE motif
chr10:53678819_C_T	chr10	53678719	53678919	+	0.18036300000000005	0.0030101547406395602	mutated MAGGIE motif
chr10:53679200_C_G	chr10	53679100	53679300	+	-0.334994	1.13327713413795e-07	mutated MAGGIE motif
chr10:53679978_A_G	chr10	53679878	53680078	+	0.18040600000000007	0.0030101547406395602	mutated MAGGIE motif
chr10:53680099_G_A	chr10	53679999	53680199	+	0.14575000000000005	0.00372865592207396	mutated MAGGIE motif
chr10:53680107_C_T	chr10	53680007	53680207	+	0.13968199999999995	0.00507703565525614	mutated MAGGIE motif
chr10:53789667_A_C	chr10	53789567	53789767	+	-0.122427	0.0180496575791476	mutated MAGGIE motif
chr10:53790461_C_T	chr10	53790361	53790561	+	0.15499399999999994	0.0124093472909138	mutated MAGGIE motif
chr10:53790625_C_A	chr10	53790525	53790725	+	0.15500999999999998	0.0124093472909138	mutated MAGGIE motif
chr10:53791217_T_C	chr10	53791117	53791317	+	0.13848300000000002	0.0180496575791476	mutated MAGGIE motif
chr10:54072901_C_T	chr10	54072801	54073001	+	-0.04966300000000001	0.00399648374414885	mutated MAGGIE motif
chr10:54076271_A_G	chr10	54076171	54076371	+	0.04275299999999993	0.00581214172605086	mutated MAGGIE motif
chr10:54077570_AT_A	chr10	54077470	54077670	+	-0.060796000000000024	0.00382250766812675	mutated MAGGIE motif
chr10:54079054_G_A	chr10	54078954	54079154	+	-0.060852000000000024	0.00382250766812675	mutated MAGGIE motif
chr10:54079716_T_C	chr10	54079616	54079816	+	0.04297499999999999	0.00581214172605086	mutated MAGGIE motif
chr10:54087105_G_A	chr10	54087005	54087205	+	-0.06079200000000001	0.00382250766812675	mutated MAGGIE motif
chr10:54087203_A_C	chr10	54087103	54087303	+	-0.057305	0.00515890430962604	mutated MAGGIE motif
chr10:54089870_T_A	chr10	54089770	54089970	+	-0.060796000000000024	0.00382250766812675	mutated MAGGIE motif
chr10:54093852_C_T	chr10	54093752	54093952	+	-0.06078199999999995	0.00382250766812675	mutated MAGGIE motif
chr10:54095703_A_G	chr10	54095603	54095803	+	-0.060821000000000014	0.00382250766812675	mutated MAGGIE motif
chr10:54095773_A_C	chr10	54095673	54095873	+	0.042713	0.00581214172605086	mutated MAGGIE motif
chr10:54096200_G_T	chr10	54096100	54096300	+	0.04303500000000005	0.00581214172605086	mutated MAGGIE motif
chr10:54096834_C_A	chr10	54096734	54096934	+	-0.06124600000000002	0.00382250766812675	mutated MAGGIE motif
chr10:56903361_A_G	chr10	56903261	56903461	+	0.250711	2.16573471358909e-12	mutated MAGGIE motif
chr10:56903794_T_C	chr10	56903694	56903894	+	-0.15984199999999998	0.0190144449343459	mutated MAGGIE motif
chr10:56903944_G_C	chr10	56903844	56904044	+	-0.274686	3.54527525148357e-16	mutated MAGGIE motif
chr10:56904078_G_A	chr10	56903978	56904178	+	-0.159684	0.0190144449343459	mutated MAGGIE motif
chr10:56904560_G_A	chr10	56904460	56904660	+	-0.16073500000000002	0.0190144449343459	mutated MAGGIE motif
chr10:56904647_C_T	chr10	56904547	56904747	+	-0.13786199999999998	0.0287927624114654	mutated MAGGIE motif
chr10:56904871_T_G	chr10	56904771	56904971	+	-0.13792700000000002	0.0287927624114654	mutated MAGGIE motif
chr10:56904923_T_C	chr10	56904823	56905023	+	-0.137938	0.0287927624114654	mutated MAGGIE motif
chr10:56904954_C_T	chr10	56904854	56905054	+	-0.13791599999999998	0.0287927624114654	mutated MAGGIE motif
chr10:56905151_A_G	chr10	56905051	56905251	+	-0.239324	6.35452456775229e-09	mutated MAGGIE motif
chr10:56905187_T_G	chr10	56905087	56905287	+	-0.13802899999999999	0.0287927624114654	mutated MAGGIE motif
chr10:56905571_C_T	chr10	56905471	56905671	+	-0.138048	0.0287927624114654	mutated MAGGIE motif
chr10:56905634_C_G	chr10	56905534	56905734	+	-0.27358299999999997	3.3612810874083595e-16	mutated MAGGIE motif
chr10:56905675_A_T	chr10	56905575	56905775	+	0.24728200000000003	1.896245220702e-12	mutated MAGGIE motif
chr10:56905760_C_T	chr10	56905660	56905860	+	0.2553840000000001	1.721325370351e-12	mutated MAGGIE motif
chr10:56905947_C_T	chr10	56905847	56906047	+	-0.27365700000000004	3.3612810874083595e-16	mutated MAGGIE motif
chr10:56905983_G_A	chr10	56905883	56906083	+	-0.273781	3.3612810874083595e-16	mutated MAGGIE motif
chr10:56906385_T_C	chr10	56906285	56906485	+	-0.273609	3.3612810874083595e-16	mutated MAGGIE motif
chr10:56906444_C_A	chr10	56906344	56906544	+	0.2476729999999999	1.896245220702e-12	mutated MAGGIE motif
chr10:56906527_G_A	chr10	56906427	56906627	+	-0.27355300000000005	3.3612810874083595e-16	mutated MAGGIE motif
chr10:59731498_T_G	chr10	59731398	59731598	+	-0.14155	0.030161930298673	mutated MAGGIE motif
chr10:59732781_G_A	chr10	59732681	59732881	+	-0.141756	0.030161930298673	mutated MAGGIE motif
chr10:59733318_A_G	chr10	59733218	59733418	+	-0.14157800000000004	0.030161930298673	mutated MAGGIE motif
chr10:59733812_A_G	chr10	59733712	59733912	+	-0.14172600000000002	0.030161930298673	mutated MAGGIE motif
chr10:59734068_A_G	chr10	59733968	59734168	+	-0.141584	0.030161930298673	mutated MAGGIE motif
chr10:59734197_T_C	chr10	59734097	59734297	+	-0.14155	0.030161930298673	mutated MAGGIE motif
chr10:59734426_C_G	chr10	59734326	59734526	+	-0.14155	0.030161930298673	mutated MAGGIE motif
chr10:60014325_T_C	chr10	60014225	60014425	+	0.15814799999999996	0.0151676963914222	mutated MAGGIE motif
chr10:60014595_A_G	chr10	60014495	60014695	+	0.15819700000000006	0.0151676963914222	mutated MAGGIE motif
chr10:60014646_G_A	chr10	60014546	60014746	+	0.15816799999999998	0.0151676963914222	mutated MAGGIE motif
chr10:60272248_C_T	chr10	60272148	60272348	+	-0.13972399999999996	0.00343773144923838	mutated MAGGIE motif
chr10:60276068_A_G	chr10	60275968	60276168	+	-0.13909899999999994	0.00343773144923838	mutated MAGGIE motif
chr10:60276291_C_T	chr10	60276191	60276391	+	-0.138654	0.00343773144923838	mutated MAGGIE motif
chr10:60276829_C_T	chr10	60276729	60276929	+	-0.13873600000000005	0.00343773144923838	mutated MAGGIE motif
chr10:60277249_G_A	chr10	60277149	60277349	+	-0.138737	0.00343773144923838	mutated MAGGIE motif
chr10:60277489_C_T	chr10	60277389	60277589	+	-0.13893099999999994	0.00343773144923838	mutated MAGGIE motif
chr10:60277549_A_C	chr10	60277449	60277649	+	-0.139096	0.00343773144923838	mutated MAGGIE motif
chr10:60278255_G_A	chr10	60278155	60278355	+	-0.139191	0.00343773144923838	mutated MAGGIE motif
chr10:60278573_C_T	chr10	60278473	60278673	+	-0.13976700000000006	0.00343773144923838	mutated MAGGIE motif
chr10:60314183_A_C	chr10	60314083	60314283	+	0.197221	0.00620817450550144	mutated MAGGIE motif
chr10:60314275_G_A	chr10	60314175	60314375	+	0.19462500000000005	0.00620817450550144	mutated MAGGIE motif
chr10:60314625_AT_A	chr10	60314525	60314725	+	0.19708100000000006	0.00620817450550144	mutated MAGGIE motif
chr10:60314815_A_T	chr10	60314715	60314915	+	0.197183	0.00620817450550144	mutated MAGGIE motif
chr10:60316211_A_G	chr10	60316111	60316311	+	-0.194474	0.00620817450550144	mutated MAGGIE motif
chr10:61322295_A_G	chr10	61322195	61322395	+	0.19236999999999996	0.0226762389810921	mutated MAGGIE motif
chr10:6177794_C_T	chr10	6177694	6177894	+	0.12456199999999995	0.0210131140120119	mutated MAGGIE motif
chr10:6178236_G_A	chr10	6178136	6178336	+	0.12522200000000006	0.0210131140120119	mutated MAGGIE motif
chr10:6178305_C_T	chr10	6178205	6178405	+	0.12459900000000003	0.0210131140120119	mutated MAGGIE motif
chr10:6178344_T_C	chr10	6178244	6178444	+	0.12466999999999995	0.0210131140120119	mutated MAGGIE motif
chr10:6178388_C_T	chr10	6178288	6178488	+	0.12458900000000005	0.0210131140120119	mutated MAGGIE motif
chr10:62041129_T_C	chr10	62041029	62041229	+	0.09225099999999996	0.0325087410864295	mutated MAGGIE motif
chr10:62041296_T_A	chr10	62041196	62041396	+	0.09128999999999997	0.0325087410864295	mutated MAGGIE motif
chr10:62041591_T_C	chr10	62041491	62041691	+	0.09125399999999996	0.0325087410864295	mutated MAGGIE motif
chr10:62042734_A_G	chr10	62042634	62042834	+	-0.092132	0.0325087410864295	mutated MAGGIE motif
chr10:62045932_C_T	chr10	62045832	62046032	+	-0.09246500000000002	0.0325087410864295	mutated MAGGIE motif
chr10:62065288_A_G	chr10	62065188	62065388	+	0.116769	0.0458082356909268	mutated MAGGIE motif
chr10:62065872_G_A	chr10	62065772	62065972	+	0.112329	0.0458082356909268	mutated MAGGIE motif
chr10:63220463_A_G	chr10	63220363	63220563	+	-0.160065	0.0349707635195643	mutated MAGGIE motif
chr10:63220824_A_G	chr10	63220724	63220924	+	0.20294700000000002	2.1129397698513e-05	mutated MAGGIE motif
chr10:63222564_A_C	chr10	63222464	63222664	+	-0.15692499999999998	0.0349707635195643	mutated MAGGIE motif
chr10:63223455_A_G	chr10	63223355	63223555	+	0.18133599999999994	0.000167304828270186	mutated MAGGIE motif
chr10:67099462_A_C	chr10	67099362	67099562	+	-0.15294100000000002	0.00476711738850576	mutated MAGGIE motif
chr10:67100591_A_T	chr10	67100491	67100691	+	0.10685399999999999	0.00476711738850576	mutated MAGGIE motif
chr10:67101278_A_C	chr10	67101178	67101378	+	0.11328800000000006	0.00476711738850576	mutated MAGGIE motif
chr10:6713541_C_T	chr10	6713441	6713641	+	-0.222615	0.00429152806603877	mutated MAGGIE motif
chr10:6713760_T_C	chr10	6713660	6713860	+	-0.233699	0.0032147388419481396	mutated MAGGIE motif
chr10:6713969_T_C	chr10	6713869	6714069	+	-0.191272	0.0102731401130641	mutated MAGGIE motif
chr10:6714424_T_C	chr10	6714324	6714524	+	-0.182866	0.0196393184028718	mutated MAGGIE motif
chr10:6714588_T_C	chr10	6714488	6714688	+	-0.199429	0.0069390964610216285	mutated MAGGIE motif
chr10:6716631_A_G	chr10	6716531	6716731	+	-0.199799	0.00429152806603877	mutated MAGGIE motif
chr10:6716636_T_A	chr10	6716536	6716736	+	-0.199799	0.00429152806603877	mutated MAGGIE motif
chr10:6716637_C_A	chr10	6716537	6716737	+	-0.199799	0.00429152806603877	mutated MAGGIE motif
chr10:6717396_T_C	chr10	6717296	6717496	+	-0.16101100000000002	0.0249119200418575	mutated MAGGIE motif
chr10:6717515_T_C	chr10	6717415	6717615	+	-0.23656900000000006	0.0032147388419481396	mutated MAGGIE motif
chr10:6717865_C_T	chr10	6717765	6717965	+	-0.218299	0.00429152806603877	mutated MAGGIE motif
chr10:70481389_G_A	chr10	70481289	70481489	+	-0.08574899999999996	0.0232970433019297	mutated MAGGIE motif
chr10:71574966_T_C	chr10	71574866	71575066	+	0.12816099999999994	0.00317797170970249	mutated MAGGIE motif
chr10:71575551_G_A	chr10	71575451	71575651	+	0.11877099999999995	0.00022942009729121895	mutated MAGGIE motif
chr10:71576478_A_G	chr10	71576378	71576578	+	0.15339099999999994	0.00303262970200541	mutated MAGGIE motif
chr10:71577319_G_A	chr10	71577219	71577419	+	0.12447200000000005	0.0005287815190242	mutated MAGGIE motif
chr10:71577764_C_T	chr10	71577664	71577864	+	-0.15605799999999995	0.00303262970200541	mutated MAGGIE motif
chr10:71577902_C_T	chr10	71577802	71578002	+	0.09697600000000006	0.00303262970200541	mutated MAGGIE motif
chr10:71578300_T_C	chr10	71578200	71578400	+	0.17309700000000006	0.000149184579464679	mutated MAGGIE motif
chr10:71579347_C_A	chr10	71579247	71579447	+	0.1268100000000001	0.000149184579464679	mutated MAGGIE motif
chr10:71579681_G_A	chr10	71579581	71579781	+	0.12084300000000005	0.000254883538484076	mutated MAGGIE motif
chr10:71580120_T_C	chr10	71580020	71580220	+	-0.148882	0.00303262970200541	mutated MAGGIE motif
chr10:71580893_G_A	chr10	71580793	71580993	+	0.12500200000000006	0.000149184579464679	mutated MAGGIE motif
chr10:72872069_T_TTTTCTC	chr10	72871969	72872169	+	-0.177518	0.00787202717586146	mutated MAGGIE motif
chr10:72872252_G_A	chr10	72872152	72872352	+	0.148463	0.008543640110674109	mutated MAGGIE motif
chr10:72872609_C_G	chr10	72872509	72872709	+	-0.177695	0.00787202717586146	mutated MAGGIE motif
chr10:72872653_T_A	chr10	72872553	72872753	+	0.14837299999999998	0.008543640110674109	mutated MAGGIE motif
chr10:72872879_A_T	chr10	72872779	72872979	+	-0.17760499999999999	0.00787202717586146	mutated MAGGIE motif
chr10:73032926_G_A	chr10	73032826	73033026	+	0.12408799999999998	0.0143378229791813	mutated MAGGIE motif
chr10:73033105_T_A	chr10	73033005	73033205	+	-0.15154700000000002	0.0169546715914678	mutated MAGGIE motif
chr10:73716007_C_T	chr10	73715907	73716107	+	0.12708399999999995	0.0248532580156019	mutated MAGGIE motif
chr10:73716279_T_G	chr10	73716179	73716379	+	0.12708699999999995	0.0248532580156019	mutated MAGGIE motif
chr10:73716873_T_A	chr10	73716773	73716973	+	0.10278199999999993	0.0344095239998297	mutated MAGGIE motif
chr10:73744999_T_C	chr10	73744899	73745099	+	-0.147689	0.0207156363859845	mutated MAGGIE motif
chr10:73745476_C_T	chr10	73745376	73745576	+	-0.186785	0.00344970264832339	mutated MAGGIE motif
chr10:74077393_C_T	chr10	74077293	74077493	+	0.10308799999999996	0.0224027082908545	mutated MAGGIE motif
chr10:74078408_T_G	chr10	74078308	74078508	+	-0.10349100000000001	0.0224027082908545	mutated MAGGIE motif
chr10:74081183_G_T	chr10	74081083	74081283	+	-0.129185	0.0224027082908545	mutated MAGGIE motif
chr10:74082212_A_G	chr10	74082112	74082312	+	-0.106943	0.0224027082908545	mutated MAGGIE motif
chr10:74870507_A_C	chr10	74870407	74870607	+	-0.15593600000000002	0.0361888433147076	mutated MAGGIE motif
chr10:74870853_T_G	chr10	74870753	74870953	+	-0.15526900000000002	0.0361888433147076	mutated MAGGIE motif
chr10:74870854_A_C	chr10	74870754	74870954	+	-0.15526900000000002	0.0361888433147076	mutated MAGGIE motif
chr10:75489721_C_T	chr10	75489621	75489821	+	0.10611000000000004	0.0186248283029418	mutated MAGGIE motif
chr10:80827015_C_T	chr10	80826915	80827115	+	0.12322600000000004	0.0357225482582401	mutated MAGGIE motif
chr10:80828245_A_G	chr10	80828145	80828345	+	0.13538400000000006	0.0168331932430278	mutated MAGGIE motif
chr10:80829654_T_G	chr10	80829554	80829754	+	0.12237600000000005	0.0357225482582401	mutated MAGGIE motif
chr10:80829667_T_G	chr10	80829567	80829767	+	0.12316700000000005	0.0357225482582401	mutated MAGGIE motif
chr10:80830551_T_C	chr10	80830451	80830651	+	0.14777399999999996	0.0069650279268055285	mutated MAGGIE motif
chr10:80831184_C_T	chr10	80831084	80831284	+	0.123197	0.0357225482582401	mutated MAGGIE motif
chr10:80831898_A_G	chr10	80831798	80831998	+	0.12328500000000008	0.0357225482582401	mutated MAGGIE motif
chr10:80832067_A_C	chr10	80831967	80832167	+	0.15322400000000005	0.0069650279268055285	mutated MAGGIE motif
chr10:80886061_C_T	chr10	80885961	80886161	+	0.21213000000000004	4.71960325195474e-05	mutated MAGGIE motif
chr10:80886599_G_C	chr10	80886499	80886699	+	0.21225000000000005	4.71960325195474e-05	mutated MAGGIE motif
chr10:80886726_A_G	chr10	80886626	80886826	+	0.18751800000000007	0.000362504773183731	mutated MAGGIE motif
chr10:80886835_T_C	chr10	80886735	80886935	+	0.21211499999999994	4.71960325195474e-05	mutated MAGGIE motif
chr10:80887212_C_T	chr10	80887112	80887312	+	0.21220699999999992	4.71960325195474e-05	mutated MAGGIE motif
chr10:80887337_G_A	chr10	80887237	80887437	+	0.21231999999999995	4.71960325195474e-05	mutated MAGGIE motif
chr10:80887721_T_G	chr10	80887621	80887821	+	0.18730500000000005	0.000362504773183731	mutated MAGGIE motif
chr10:80888588_A_AAAAAG	chr10	80888488	80888688	+	0.18722399999999995	0.000362504773183731	mutated MAGGIE motif
chr10:80888858_G_A	chr10	80888758	80888958	+	0.18718500000000005	0.000362504773183731	mutated MAGGIE motif
chr10:80889806_A_G	chr10	80889706	80889906	+	0.212112	4.71960325195474e-05	mutated MAGGIE motif
chr10:81926702_G_A	chr10	81926602	81926802	+	-0.08574399999999999	0.0468859608089431	mutated MAGGIE motif
chr10:90039355_A_AACAC	chr10	90039255	90039455	+	0.194842	0.0148898503085053	mutated MAGGIE motif
chr10:90041294_G_A	chr10	90041194	90041394	+	0.18736700000000006	0.0127481105246161	mutated MAGGIE motif
chr10:91175016_T_A	chr10	91174916	91175116	+	-0.070025	0.0488651938081749	mutated MAGGIE motif
chr10:91175412_A_G	chr10	91175312	91175512	+	-0.07008599999999998	0.0488651938081749	mutated MAGGIE motif
chr10:91348786_G_C	chr10	91348686	91348886	+	0.26572299999999993	0.00188384763987072	mutated MAGGIE motif
chr10:91959021_G_A	chr10	91958921	91959121	+	0.286929	3.71836971422057e-06	mutated MAGGIE motif
chr10:91959144_T_C	chr10	91959044	91959244	+	0.290427	3.71836971422057e-06	mutated MAGGIE motif
chr10:91960142_G_A	chr10	91960042	91960242	+	0.230267	0.000697091984439475	mutated MAGGIE motif
chr10:93363288_A_G	chr10	93363188	93363388	+	0.08601899999999996	0.00126189701867184	mutated MAGGIE motif
chr10:93363578_C_T	chr10	93363478	93363678	+	0.110846	0.0008870868479614929	mutated MAGGIE motif
chr10:93363681_G_A	chr10	93363581	93363781	+	0.11068299999999998	0.0008870868479614929	mutated MAGGIE motif
chr10:93364173_T_C	chr10	93364073	93364273	+	0.11514199999999995	0.0008870868479614929	mutated MAGGIE motif
chr10:93364797_T_G	chr10	93364697	93364897	+	0.10319	0.0111760990801386	mutated MAGGIE motif
chr10:93365142_T_C	chr10	93365042	93365242	+	0.11076300000000006	0.0008870868479614929	mutated MAGGIE motif
chr10:93365404_C_T	chr10	93365304	93365504	+	0.11085	0.0008870868479614929	mutated MAGGIE motif
chr10:93365444_G_C	chr10	93365344	93365544	+	0.11076200000000004	0.0008870868479614929	mutated MAGGIE motif
chr10:93366068_A_G	chr10	93365968	93366168	+	0.11084099999999997	0.0008870868479614929	mutated MAGGIE motif
chr10:94572035_A_G	chr10	94571935	94572135	+	0.150084	0.0360134899687251	mutated MAGGIE motif
chr10:95205227_C_A	chr10	95205127	95205327	+	-0.14175500000000002	0.0301271336794041	mutated MAGGIE motif
chr10:95205411_G_T	chr10	95205311	95205511	+	-0.099202	0.0482952856707416	mutated MAGGIE motif
chr10:95205446_C_T	chr10	95205346	95205546	+	-0.14229000000000006	0.0301271336794041	mutated MAGGIE motif
chr10:95205726_C_T	chr10	95205626	95205826	+	-0.14213299999999998	0.0301271336794041	mutated MAGGIE motif
chr10:95205947_G_A	chr10	95205847	95206047	+	-0.11708200000000002	0.0231464322163351	mutated MAGGIE motif
chr10:95205950_G_T	chr10	95205850	95206050	+	0.21933699999999998	2.06805383213455e-06	mutated MAGGIE motif
chr10:95206873_C_G	chr10	95206773	95206973	+	-0.11165799999999998	0.0274473082541981	mutated MAGGIE motif
chr10:95207000_C_T	chr10	95206900	95207100	+	-0.173489	0.000203470193078834	mutated MAGGIE motif
chr10:99320537_G_T	chr10	99320437	99320637	+	0.170597	0.0307954369511797	mutated MAGGIE motif
chr10:99636665_C_CAA	chr10	99636565	99636765	+	-0.17890900000000004	0.0289952560400321	mutated MAGGIE motif
chr10:99637104_C_T	chr10	99637004	99637204	+	0.15966599999999995	0.0289952560400321	mutated MAGGIE motif
chr10:99638183_C_T	chr10	99638083	99638283	+	-0.15301900000000002	0.0289952560400321	mutated MAGGIE motif
chr10:99638198_T_C	chr10	99638098	99638298	+	-0.14711199999999994	0.0318941073019995	mutated MAGGIE motif
chr10:99640255_G_A	chr10	99640155	99640355	+	0.108001	0.0120789237047417	mutated MAGGIE motif
chr10:99640463_C_T	chr10	99640363	99640563	+	0.12327200000000005	0.0120789237047417	mutated MAGGIE motif
chr10:99640572_T_G	chr10	99640472	99640672	+	0.115549	0.0120789237047417	mutated MAGGIE motif
chr10:99640811_C_T	chr10	99640711	99640911	+	0.107954	0.0120789237047417	mutated MAGGIE motif
chr10:99641418_ACT_A	chr10	99641318	99641518	+	0.10748800000000004	0.0120789237047417	mutated MAGGIE motif
chr10:99641771_T_G	chr10	99641671	99641871	+	0.11029699999999998	0.0120789237047417	mutated MAGGIE motif
chr10:99642393_T_G	chr10	99642293	99642493	+	0.10713300000000003	0.0120789237047417	mutated MAGGIE motif
chr10:99643129_C_T	chr10	99643029	99643229	+	0.10376500000000001	0.0120789237047417	mutated MAGGIE motif
chr11:102212880_A_G	chr11	102212780	102212980	+	0.11429699999999997	0.0112139233071349	mutated MAGGIE motif
chr11:102213131_C_T	chr11	102213031	102213231	+	0.110765	0.0112139233071349	mutated MAGGIE motif
chr11:102214058_A_G	chr11	102213958	102214158	+	0.11085500000000004	0.0112139233071349	mutated MAGGIE motif
chr11:102601772_G_C	chr11	102601672	102601872	+	-0.11628499999999994	0.008527156254197041	mutated MAGGIE motif
chr11:102601773_G_A	chr11	102601673	102601873	+	-0.11640700000000005	0.008527156254197041	mutated MAGGIE motif
chr11:102663708_T_G	chr11	102663608	102663808	+	-0.13582899999999998	0.0119961532195084	mutated MAGGIE motif
chr11:102669312_A_T	chr11	102669212	102669412	+	-0.11984299999999998	0.00932541366222533	mutated MAGGIE motif
chr11:102669409_T_C	chr11	102669309	102669509	+	-0.204731	2.84462868687161e-06	mutated MAGGIE motif
chr11:102669645_A_C	chr11	102669545	102669745	+	0.17357	2.1625952551998105e-05	mutated MAGGIE motif
chr11:102669729_C_T	chr11	102669629	102669829	+	-0.21262899999999998	3.76219150710243e-07	mutated MAGGIE motif
chr11:102670495_TC_T	chr11	102670395	102670595	+	-0.234791	1.9898786478541104e-09	mutated MAGGIE motif
chr11:102672449_T_G	chr11	102672349	102672549	+	0.13142200000000004	0.0169847871051254	mutated MAGGIE motif
chr11:102672553_C_T	chr11	102672453	102672653	+	0.14816800000000008	0.00763526652645462	mutated MAGGIE motif
chr11:102673248_A_T	chr11	102673148	102673348	+	-0.225517	1.15923268891996e-08	mutated MAGGIE motif
chr11:102673414_C_G	chr11	102673314	102673514	+	0.14866199999999996	0.00763526652645462	mutated MAGGIE motif
chr11:103456407_G_C	chr11	103456307	103456507	+	0.26041800000000004	3.7965105774277294e-15	mutated MAGGIE motif
chr11:103456909_G_A	chr11	103456809	103457009	+	0.26386200000000004	2.34049442076438e-15	mutated MAGGIE motif
chr11:103456923_T_A	chr11	103456823	103457023	+	0.26387700000000003	2.34049442076438e-15	mutated MAGGIE motif
chr11:103457114_T_C	chr11	103457014	103457214	+	0.26382799999999995	2.34049442076438e-15	mutated MAGGIE motif
chr11:103457818_G_C	chr11	103457718	103457918	+	0.263757	2.34049442076438e-15	mutated MAGGIE motif
chr11:103458794_A_T	chr11	103458694	103458894	+	-0.211469	1.31450462384293e-08	mutated MAGGIE motif
chr11:103459106_A_G	chr11	103459006	103459206	+	-0.117477	0.0244372424708402	mutated MAGGIE motif
chr11:103459362_C_T	chr11	103459262	103459462	+	0.26382399999999995	2.34049442076438e-15	mutated MAGGIE motif
chr11:103460014_A_G	chr11	103459914	103460114	+	0.25745299999999993	3.7965105774277294e-15	mutated MAGGIE motif
chr11:103460484_T_G	chr11	103460384	103460584	+	0.254397	1.36280829116402e-14	mutated MAGGIE motif
chr11:103460715_C_G	chr11	103460615	103460815	+	0.259533	2.42499887912409e-15	mutated MAGGIE motif
chr11:103461459_G_T	chr11	103461359	103461559	+	-0.218927	1.12801922849067e-08	mutated MAGGIE motif
chr11:103461942_T_C	chr11	103461842	103462042	+	0.259536	2.42499887912409e-15	mutated MAGGIE motif
chr11:103462223_G_A	chr11	103462123	103462323	+	0.25959099999999996	2.42499887912409e-15	mutated MAGGIE motif
chr11:103462488_T_C	chr11	103462388	103462588	+	0.25954099999999997	2.42499887912409e-15	mutated MAGGIE motif
chr11:103462744_T_C	chr11	103462644	103462844	+	0.259628	2.42499887912409e-15	mutated MAGGIE motif
chr11:103489944_G_T	chr11	103489844	103490044	+	-0.03629399999999994	0.0424699738907789	mutated MAGGIE motif
chr11:103490126_A_AAAAAGAAAAG	chr11	103490026	103490226	+	-0.04279799999999995	0.0424699738907789	mutated MAGGIE motif
chr11:103490341_C_T	chr11	103490241	103490441	+	0.06708900000000008	0.0153451633189757	mutated MAGGIE motif
chr11:103490943_G_T	chr11	103490843	103491043	+	-0.04361899999999996	0.0167140881498587	mutated MAGGIE motif
chr11:103494140_A_C	chr11	103494040	103494240	+	0.03476899999999994	0.0330739901710075	mutated MAGGIE motif
chr11:103498125_C_T	chr11	103498025	103498225	+	0.055889000000000084	0.000128576966058302	mutated MAGGIE motif
chr11:103498434_A_G	chr11	103498334	103498534	+	0.06384699999999999	0.000146650706207726	mutated MAGGIE motif
chr11:103498473_G_C	chr11	103498373	103498573	+	0.063639	1.47498275697146e-05	mutated MAGGIE motif
chr11:103499104_A_T	chr11	103499004	103499204	+	0.060270999999999963	1.49215937476788e-05	mutated MAGGIE motif
chr11:103499584_A_G	chr11	103499484	103499684	+	0.045744000000000014	0.000413052797145415	mutated MAGGIE motif
chr11:103500160_C_A	chr11	103500060	103500260	+	0.04775099999999999	0.000337702221378845	mutated MAGGIE motif
chr11:103501856_C_T	chr11	103501756	103501956	+	0.047722000000000035	0.000337702221378845	mutated MAGGIE motif
chr11:103502520_C_T	chr11	103502420	103502620	+	-0.04487299999999994	0.000615556782872079	mutated MAGGIE motif
chr11:103502706_G_A	chr11	103502606	103502806	+	-0.04715699999999995	0.000416297108507852	mutated MAGGIE motif
chr11:103503946_A_G	chr11	103503846	103504046	+	0.062274999999999976	1.47498275697146e-05	mutated MAGGIE motif
chr11:103504898_TA_T	chr11	103504798	103504998	+	-0.047984000000000034	0.000413052797145415	mutated MAGGIE motif
chr11:103504918_T_G	chr11	103504818	103505018	+	0.04857100000000003	0.000337702221378845	mutated MAGGIE motif
chr11:103505127_A_T	chr11	103505027	103505227	+	0.048343000000000025	0.000191282528262296	mutated MAGGIE motif
chr11:103505169_C_T	chr11	103505069	103505269	+	-0.04873299999999997	0.000413052797145415	mutated MAGGIE motif
chr11:103505731_G_A	chr11	103505631	103505831	+	-0.04608699999999999	0.0005053123374712928	mutated MAGGIE motif
chr11:103506242_G_A	chr11	103506142	103506342	+	-0.04776400000000003	0.000416297108507852	mutated MAGGIE motif
chr11:103506359_C_T	chr11	103506259	103506459	+	-0.047222000000000035	0.000445634835898662	mutated MAGGIE motif
chr11:103506972_C_T	chr11	103506872	103507072	+	0.049817	0.000182656396750237	mutated MAGGIE motif
chr11:103507093_T_C	chr11	103506993	103507193	+	0.047153	0.000191282528262296	mutated MAGGIE motif
chr11:103507283_C_T	chr11	103507183	103507383	+	0.047767	0.000191282528262296	mutated MAGGIE motif
chr11:103507752_G_A	chr11	103507652	103507852	+	-0.035212999999999994	0.0424699738907789	mutated MAGGIE motif
chr11:103509163_G_A	chr11	103509063	103509263	+	0.043829000000000014	0.0110515960419932	mutated MAGGIE motif
chr11:103509801_A_C	chr11	103509701	103509901	+	0.04303599999999996	0.0110515960419932	mutated MAGGIE motif
chr11:103510756_G_T	chr11	103510656	103510856	+	-0.040599	0.0114020213769252	mutated MAGGIE motif
chr11:103510897_G_A	chr11	103510797	103510997	+	0.04944199999999999	0.000337702221378845	mutated MAGGIE motif
chr11:103511220_T_C	chr11	103511120	103511320	+	0.049123999999999945	0.000128576966058302	mutated MAGGIE motif
chr11:103511353_T_A	chr11	103511253	103511453	+	0.050066999999999966	0.000128576966058302	mutated MAGGIE motif
chr11:103511356_A_G	chr11	103511256	103511456	+	0.05002700000000005	0.000128576966058302	mutated MAGGIE motif
chr11:103511605_A_T	chr11	103511505	103511705	+	0.043763	0.0110515960419932	mutated MAGGIE motif
chr11:103512209_A_G	chr11	103512109	103512309	+	-0.04716199999999998	0.00508057983906935	mutated MAGGIE motif
chr11:103512389_T_C	chr11	103512289	103512489	+	0.05066300000000002	0.000128576966058302	mutated MAGGIE motif
chr11:103513338_T_C	chr11	103513238	103513438	+	0.04915600000000009	0.000128576966058302	mutated MAGGIE motif
chr11:103514866_T_G	chr11	103514766	103514966	+	-0.04712200000000005	0.00508057983906935	mutated MAGGIE motif
chr11:103515151_C_T	chr11	103515051	103515251	+	-0.04501700000000003	0.015971758016438	mutated MAGGIE motif
chr11:103515486_C_T	chr11	103515386	103515586	+	-0.047118999999999966	0.00508057983906935	mutated MAGGIE motif
chr11:103515798_A_C	chr11	103515698	103515898	+	0.04300500000000007	0.0110515960419932	mutated MAGGIE motif
chr11:103516262_A_G	chr11	103516162	103516362	+	0.049964999999999926	0.000128576966058302	mutated MAGGIE motif
chr11:103516526_A_G	chr11	103516426	103516626	+	0.061635	2.70882533788789e-05	mutated MAGGIE motif
chr11:103528885_A_G	chr11	103528785	103528985	+	-0.17117100000000002	0.00555631185021047	mutated MAGGIE motif
chr11:103529537_G_A	chr11	103529437	103529637	+	-0.17116900000000002	0.00555631185021047	mutated MAGGIE motif
chr11:103529740_C_T	chr11	103529640	103529840	+	-0.16994899999999996	0.00555631185021047	mutated MAGGIE motif
chr11:103530242_A_AG	chr11	103530142	103530342	+	-0.17118299999999995	0.00555631185021047	mutated MAGGIE motif
chr11:103668610_A_C	chr11	103668510	103668710	+	-0.103171	0.0071614345094273705	mutated MAGGIE motif
chr11:103668962_A_T	chr11	103668862	103669062	+	-0.15457200000000001	3.4349349206927293e-06	mutated MAGGIE motif
chr11:103669291_T_TTATTGAA	chr11	103669191	103669391	+	-0.154588	3.4349349206927293e-06	mutated MAGGIE motif
chr11:103669806_G_A	chr11	103669706	103669906	+	-0.103174	0.0071614345094273705	mutated MAGGIE motif
chr11:103670449_T_C	chr11	103670349	103670549	+	-0.14143699999999998	8.0410728106104e-06	mutated MAGGIE motif
chr11:103673247_T_C	chr11	103673147	103673347	+	0.146845	0.0005667960842078678	mutated MAGGIE motif
chr11:103673294_T_A	chr11	103673194	103673394	+	-0.14685299999999998	4.8780658348753e-06	mutated MAGGIE motif
chr11:103675345_A_G	chr11	103675245	103675445	+	0.144752	6.30756237477297e-06	mutated MAGGIE motif
chr11:103675940_C_T	chr11	103675840	103676040	+	0.113452	0.0345735537784442	mutated MAGGIE motif
chr11:103676263_A_T	chr11	103676163	103676363	+	0.13031600000000002	0.022812827943405	mutated MAGGIE motif
chr11:103676698_A_G	chr11	103676598	103676798	+	0.10148800000000002	0.008884821758581109	mutated MAGGIE motif
chr11:103677183_A_G	chr11	103677083	103677283	+	0.14681499999999992	0.0005667960842078678	mutated MAGGIE motif
chr11:103677453_G_A	chr11	103677353	103677553	+	-0.13833199999999998	8.0410728106104e-06	mutated MAGGIE motif
chr11:103677513_T_C	chr11	103677413	103677613	+	-0.138303	8.0410728106104e-06	mutated MAGGIE motif
chr11:104404920_A_G	chr11	104404820	104405020	+	0.14768100000000006	0.0371545860441898	mutated MAGGIE motif
chr11:104405081_C_A	chr11	104404981	104405181	+	0.152042	0.0371545860441898	mutated MAGGIE motif
chr11:104914969_G_C	chr11	104914869	104915069	+	0.12689799999999996	0.007244729601008	mutated MAGGIE motif
chr11:104915441_C_T	chr11	104915341	104915541	+	-0.274134	1.22197589474615e-06	mutated MAGGIE motif
chr11:104915444_C_A	chr11	104915344	104915544	+	-0.274134	1.22197589474615e-06	mutated MAGGIE motif
chr11:104917645_T_C	chr11	104917545	104917745	+	0.12678299999999998	0.007244729601008	mutated MAGGIE motif
chr11:104918132_T_C	chr11	104918032	104918232	+	-0.284071	7.26386112698588e-07	mutated MAGGIE motif
chr11:104918417_T_G	chr11	104918317	104918517	+	-0.13116300000000006	0.007244729601008	mutated MAGGIE motif
chr11:104918695_C_A	chr11	104918595	104918795	+	-0.15050399999999994	0.000439221740312173	mutated MAGGIE motif
chr11:107706832_C_T	chr11	107706732	107706932	+	0.08487900000000004	0.00235148135036773	mutated MAGGIE motif
chr11:107706959_CTTTT_C	chr11	107706859	107707059	+	0.08489099999999994	0.00235148135036773	mutated MAGGIE motif
chr11:107707070_G_T	chr11	107706970	107707170	+	0.08688099999999999	0.00235148135036773	mutated MAGGIE motif
chr11:107707464_A_C	chr11	107707364	107707564	+	0.08901700000000001	0.0022700485053680198	mutated MAGGIE motif
chr11:107707465_T_C	chr11	107707365	107707565	+	0.08901700000000001	0.0022700485053680198	mutated MAGGIE motif
chr11:107707472_T_C	chr11	107707372	107707572	+	0.08902600000000005	0.0022700485053680198	mutated MAGGIE motif
chr11:107707509_T_G	chr11	107707409	107707609	+	0.08894799999999993	0.0022700485053680198	mutated MAGGIE motif
chr11:107709341_T_G	chr11	107709241	107709441	+	0.084314	0.00235148135036773	mutated MAGGIE motif
chr11:107709850_C_T	chr11	107709750	107709950	+	0.08409500000000003	0.00235148135036773	mutated MAGGIE motif
chr11:107710335_T_C	chr11	107710235	107710435	+	0.08909699999999998	0.0022700485053680198	mutated MAGGIE motif
chr11:107711836_C_A	chr11	107711736	107711936	+	0.10726199999999997	0.0022700485053680198	mutated MAGGIE motif
chr11:107712020_A_G	chr11	107711920	107712120	+	-0.06726800000000005	0.0227767039288624	mutated MAGGIE motif
chr11:107712430_G_A	chr11	107712330	107712530	+	-0.06231499999999995	0.0337950598887357	mutated MAGGIE motif
chr11:107713761_C_T	chr11	107713661	107713861	+	0.101402	0.0022700485053680198	mutated MAGGIE motif
chr11:107715256_C_CAGA	chr11	107715156	107715356	+	-0.06290200000000007	0.03126985414313	mutated MAGGIE motif
chr11:108739881_G_T	chr11	108739781	108739981	+	0.17151000000000005	3.24193715284193e-06	mutated MAGGIE motif
chr11:108739909_A_G	chr11	108739809	108740009	+	0.3180970000000001	2.824006645694689e-20	mutated MAGGIE motif
chr11:108740282_C_T	chr11	108740182	108740382	+	0.31819400000000003	2.824006645694689e-20	mutated MAGGIE motif
chr11:108740947_A_G	chr11	108740847	108741047	+	0.31828100000000004	2.824006645694689e-20	mutated MAGGIE motif
chr11:108741318_A_C	chr11	108741218	108741418	+	0.31819600000000003	2.824006645694689e-20	mutated MAGGIE motif
chr11:108741957_G_A	chr11	108741857	108742057	+	0.17826200000000006	0.000864798142051759	mutated MAGGIE motif
chr11:108742450_T_G	chr11	108742350	108742550	+	0.28747	1.54508089291049e-14	mutated MAGGIE motif
chr11:108742547_C_T	chr11	108742447	108742647	+	-0.251899	2.51809516130677e-10	mutated MAGGIE motif
chr11:108744081_A_G	chr11	108743981	108744181	+	0.17527000000000004	7.410441517255029e-07	mutated MAGGIE motif
chr11:108745652_T_G	chr11	108745552	108745752	+	0.318103	2.824006645694689e-20	mutated MAGGIE motif
chr11:110182694_A_C	chr11	110182594	110182794	+	-0.191894	1.6617103274725306e-05	mutated MAGGIE motif
chr11:110184032_A_G	chr11	110183932	110184132	+	-0.188393	2.10431671458625e-05	mutated MAGGIE motif
chr11:110184166_G_A	chr11	110184066	110184266	+	-0.188314	2.10431671458625e-05	mutated MAGGIE motif
chr11:1144046_C_T	chr11	1143946	1144146	+	0.14259900000000006	0.0367538728367406	mutated MAGGIE motif
chr11:1145844_C_T	chr11	1145744	1145944	+	0.13452700000000006	0.0132275569645561	mutated MAGGIE motif
chr11:1146353_C_A	chr11	1146253	1146453	+	0.13459500000000002	0.0132275569645561	mutated MAGGIE motif
chr11:1146678_A_G	chr11	1146578	1146778	+	0.13271	0.0132275569645561	mutated MAGGIE motif
chr11:1147618_A_G	chr11	1147518	1147718	+	0.13270800000000005	0.0132275569645561	mutated MAGGIE motif
chr11:1148527_T_C	chr11	1148427	1148627	+	-0.10841999999999996	0.0431375497334857	mutated MAGGIE motif
chr11:119208561_G_C	chr11	119208461	119208661	+	0.12457399999999995	0.0389796572925312	mutated MAGGIE motif
chr11:119211246_C_A	chr11	119211146	119211346	+	-0.255309	0.00393581077362631	mutated MAGGIE motif
chr11:12009140_T_C	chr11	12009040	12009240	+	0.22107900000000005	1.48449104905142e-05	mutated MAGGIE motif
chr11:12009819_A_G	chr11	12009719	12009919	+	0.136791	1.48449104905142e-05	mutated MAGGIE motif
chr11:12011270_T_C	chr11	12011170	12011370	+	-0.10566099999999999	0.00613998167959016	mutated MAGGIE motif
chr11:12028119_T_C	chr11	12028019	12028219	+	-0.16458299999999998	0.0200729053051583	mutated MAGGIE motif
chr11:12038252_C_T	chr11	12038152	12038352	+	-0.09391900000000004	0.0179365772167227	mutated MAGGIE motif
chr11:12038396_A_C	chr11	12038296	12038496	+	-0.09387099999999997	0.0179365772167227	mutated MAGGIE motif
chr11:12038680_C_T	chr11	12038580	12038780	+	-0.09388000000000002	0.0179365772167227	mutated MAGGIE motif
chr11:12038874_G_A	chr11	12038774	12038974	+	0.11795500000000005	0.00330086573301836	mutated MAGGIE motif
chr11:12039278_G_T	chr11	12039178	12039378	+	-0.09369699999999996	0.0179365772167227	mutated MAGGIE motif
chr11:12157799_A_C	chr11	12157699	12157899	+	-0.08826999999999996	0.023174414503484	mutated MAGGIE motif
chr11:12157814_G_A	chr11	12157714	12157914	+	-0.08825699999999997	0.023174414503484	mutated MAGGIE motif
chr11:12157859_A_G	chr11	12157759	12157959	+	-0.093389	0.023174414503484	mutated MAGGIE motif
chr11:121807842_T_TCCCCC	chr11	121807742	121807942	+	0.185349	0.00138100978742455	mutated MAGGIE motif
chr11:121807981_A_G	chr11	121807881	121808081	+	0.185349	0.00138100978742455	mutated MAGGIE motif
chr11:121808647_A_T	chr11	121808547	121808747	+	0.14074700000000007	0.0244217729963815	mutated MAGGIE motif
chr11:12195442_A_T	chr11	12195342	12195542	+	0.032671000000000006	0.0404412868799965	mutated MAGGIE motif
chr11:12196272_C_G	chr11	12196172	12196372	+	0.04745299999999997	0.000285480591421135	mutated MAGGIE motif
chr11:12196413_C_G	chr11	12196313	12196513	+	-0.04652299999999998	0.000285480591421135	mutated MAGGIE motif
chr11:12197358_G_A	chr11	12197258	12197458	+	-0.03547499999999998	0.00469474698059254	mutated MAGGIE motif
chr11:12197758_C_T	chr11	12197658	12197858	+	-0.047265999999999975	0.000285480591421135	mutated MAGGIE motif
chr11:12198841_T_C	chr11	12198741	12198941	+	-0.045352000000000066	0.000285480591421135	mutated MAGGIE motif
chr11:12199456_G_A	chr11	12199356	12199556	+	-0.040359000000000034	0.0012887026996358196	mutated MAGGIE motif
chr11:12202517_C_G	chr11	12202417	12202617	+	-0.03611499999999995	0.00148118250726917	mutated MAGGIE motif
chr11:12203461_C_T	chr11	12203361	12203561	+	-0.04170200000000002	0.0005760675950716138	mutated MAGGIE motif
chr11:12204584_A_C	chr11	12204484	12204684	+	-0.04439799999999994	0.000794026301993125	mutated MAGGIE motif
chr11:12205656_C_A	chr11	12205556	12205756	+	0.04017399999999993	0.000597922406851953	mutated MAGGIE motif
chr11:12205793_T_C	chr11	12205693	12205893	+	0.040053000000000005	0.000597922406851953	mutated MAGGIE motif
chr11:12206082_C_G	chr11	12205982	12206182	+	0.04006399999999999	0.000597922406851953	mutated MAGGIE motif
chr11:12206378_A_G	chr11	12206278	12206478	+	0.040053000000000005	0.000597922406851953	mutated MAGGIE motif
chr11:12207092_T_C	chr11	12206992	12207192	+	0.04003599999999996	0.000597922406851953	mutated MAGGIE motif
chr11:12207149_A_G	chr11	12207049	12207249	+	0.044910999999999916	0.000285480591421135	mutated MAGGIE motif
chr11:12207833_C_T	chr11	12207733	12207933	+	-0.03880600000000006	0.00611655481607555	mutated MAGGIE motif
chr11:12208110_T_C	chr11	12208010	12208210	+	0.03716799999999998	0.00653117468947056	mutated MAGGIE motif
chr11:12208178_T_C	chr11	12208078	12208278	+	-0.04163699999999998	0.0005760675950716138	mutated MAGGIE motif
chr11:12208233_T_C	chr11	12208133	12208333	+	0.03715900000000005	0.00653117468947056	mutated MAGGIE motif
chr11:12208393_A_G	chr11	12208293	12208493	+	0.03716799999999998	0.00653117468947056	mutated MAGGIE motif
chr11:12209094_G_A	chr11	12208994	12209194	+	-0.04419300000000004	0.000794026301993125	mutated MAGGIE motif
chr11:12209191_G_A	chr11	12209091	12209291	+	0.03719899999999998	0.00695744288319039	mutated MAGGIE motif
chr11:12209666_G_A	chr11	12209566	12209766	+	0.03719799999999995	0.00653117468947056	mutated MAGGIE motif
chr11:12209759_A_G	chr11	12209659	12209859	+	0.054172000000000005	0.0006831253462169269	mutated MAGGIE motif
chr11:12211550_T_A	chr11	12211450	12211650	+	-0.043898999999999966	0.000794026301993125	mutated MAGGIE motif
chr11:12212968_A_G	chr11	12212868	12213068	+	0.042717000000000005	0.000794026301993125	mutated MAGGIE motif
chr11:12220580_C_T	chr11	12220480	12220680	+	0.06435900000000007	0.0018096085890362	mutated MAGGIE motif
chr11:12220653_G_T	chr11	12220553	12220753	+	-0.04784700000000003	0.0029008428165382	mutated MAGGIE motif
chr11:12220898_G_A	chr11	12220798	12220998	+	0.040630000000000055	0.0029008428165382	mutated MAGGIE motif
chr11:12221737_G_A	chr11	12221637	12221837	+	0.04061400000000004	0.0029008428165382	mutated MAGGIE motif
chr11:12221740_A_C	chr11	12221640	12221840	+	0.040614999999999964	0.0029008428165382	mutated MAGGIE motif
chr11:12221783_C_G	chr11	12221683	12221883	+	0.04064400000000001	0.0029008428165382	mutated MAGGIE motif
chr11:12221802_G_C	chr11	12221702	12221902	+	0.07738400000000001	0.0029034409947574303	mutated MAGGIE motif
chr11:12221979_T_C	chr11	12221879	12222079	+	-0.03715799999999997	0.00450650291891254	mutated MAGGIE motif
chr11:12222423_A_G	chr11	12222323	12222523	+	0.03633900000000001	0.00450650291891254	mutated MAGGIE motif
chr11:12223035_A_G	chr11	12222935	12223135	+	0.06262100000000004	0.000207025311893474	mutated MAGGIE motif
chr11:12223403_C_A	chr11	12223303	12223503	+	-0.037159	0.00450650291891254	mutated MAGGIE motif
chr11:12223409_C_T	chr11	12223309	12223509	+	0.040630000000000055	0.0029008428165382	mutated MAGGIE motif
chr11:12224211_TA_T	chr11	12224111	12224311	+	0.06433599999999995	1.57202806023365e-06	mutated MAGGIE motif
chr11:12224404_A_G	chr11	12224304	12224504	+	-0.037128	0.00450650291891254	mutated MAGGIE motif
chr11:12224607_G_T	chr11	12224507	12224707	+	-0.03681400000000001	0.00526462957658112	mutated MAGGIE motif
chr11:12224840_A_G	chr11	12224740	12224940	+	-0.027075000000000016	0.03155351185893	mutated MAGGIE motif
chr11:12224995_C_T	chr11	12224895	12225095	+	0.07736299999999996	0.0029034409947574303	mutated MAGGIE motif
chr11:12224998_C_T	chr11	12224898	12225098	+	0.064303	0.0018096085890362	mutated MAGGIE motif
chr11:12225506_C_A	chr11	12225406	12225606	+	-0.03241499999999997	0.0119897723080136	mutated MAGGIE motif
chr11:12225946_T_G	chr11	12225846	12226046	+	0.04933500000000002	0.0018096085890362	mutated MAGGIE motif
chr11:12226796_G_A	chr11	12226696	12226896	+	-0.03241400000000005	0.0119897723080136	mutated MAGGIE motif
chr11:12227307_A_T	chr11	12227207	12227407	+	0.06439300000000002	0.0018096085890362	mutated MAGGIE motif
chr11:12227844_T_G	chr11	12227744	12227944	+	0.06436200000000003	1.57202806023365e-06	mutated MAGGIE motif
chr11:12228000_A_G	chr11	12227900	12228100	+	0.041764000000000016	0.003632300919091721	mutated MAGGIE motif
chr11:12228854_T_C	chr11	12228754	12228954	+	0.05252500000000005	0.000207025311893474	mutated MAGGIE motif
chr11:12229116_G_A	chr11	12229016	12229216	+	0.045246000000000015	0.00128913273974626	mutated MAGGIE motif
chr11:12230552_G_T	chr11	12230452	12230652	+	0.066326	0.0038892283847302795	mutated MAGGIE motif
chr11:12230672_T_C	chr11	12230572	12230772	+	0.06671099999999996	0.0038892283847302795	mutated MAGGIE motif
chr11:12231277_A_G	chr11	12231177	12231377	+	0.06628199999999995	0.0038892283847302795	mutated MAGGIE motif
chr11:12231732_A_G	chr11	12231632	12231832	+	0.11962399999999995	6.20744187048253e-10	mutated MAGGIE motif
chr11:12232116_C_T	chr11	12232016	12232216	+	-0.07592399999999999	0.000124637717433007	mutated MAGGIE motif
chr11:12232732_T_C	chr11	12232632	12232832	+	0.11963800000000002	6.20744187048253e-10	mutated MAGGIE motif
chr11:12233405_A_G	chr11	12233305	12233505	+	-0.07252600000000002	0.00012706846171364	mutated MAGGIE motif
chr11:12233728_G_A	chr11	12233628	12233828	+	-0.06366400000000005	0.0124037306768939	mutated MAGGIE motif
chr11:12234439_A_T	chr11	12234339	12234539	+	0.05945200000000006	0.00197801678499603	mutated MAGGIE motif
chr11:12234496_A_G	chr11	12234396	12234596	+	-0.05557200000000001	0.00126265004369755	mutated MAGGIE motif
chr11:12234625_CTT_C	chr11	12234525	12234725	+	0.13291699999999995	1.52038256435601e-10	mutated MAGGIE motif
chr11:12234704_G_A	chr11	12234604	12234804	+	-0.05648900000000001	0.000909546857911526	mutated MAGGIE motif
chr11:12235224_G_A	chr11	12235124	12235324	+	0.18456700000000004	4.32122846168235e-09	mutated MAGGIE motif
chr11:12235407_G_T	chr11	12235307	12235507	+	0.04756499999999997	0.0129988957600426	mutated MAGGIE motif
chr11:12235726_C_T	chr11	12235626	12235826	+	0.13199399999999994	4.7029674171450895e-09	mutated MAGGIE motif
chr11:12237309_G_T	chr11	12237209	12237409	+	0.15262700000000007	8.81018326132141e-08	mutated MAGGIE motif
chr11:12238427_C_A	chr11	12238327	12238527	+	0.14971099999999993	2.6767371674471e-05	mutated MAGGIE motif
chr11:12240019_G_A	chr11	12239919	12240119	+	0.057948	0.0242034007091889	mutated MAGGIE motif
chr11:12240944_A_G	chr11	12240844	12241044	+	0.090445	1.5541743621197502e-05	mutated MAGGIE motif
chr11:12290812_G_A	chr11	12290712	12290912	+	0.24617100000000006	0.00030610230724309	mutated MAGGIE motif
chr11:12292654_A_G	chr11	12292554	12292754	+	0.21570100000000006	0.00058093762406513	mutated MAGGIE motif
chr11:123008115_G_A	chr11	123008015	123008215	+	0.14665699999999993	0.0348448415586282	mutated MAGGIE motif
chr11:12302199_G_A	chr11	12302099	12302299	+	-0.09113100000000003	0.000527233198453547	mutated MAGGIE motif
chr11:12302398_C_G	chr11	12302298	12302498	+	-0.091001	0.000527233198453547	mutated MAGGIE motif
chr11:12302431_A_G	chr11	12302331	12302531	+	-0.09086700000000003	0.000527233198453547	mutated MAGGIE motif
chr11:12302606_A_G	chr11	12302506	12302706	+	-0.091406	0.000527233198453547	mutated MAGGIE motif
chr11:12302796_C_G	chr11	12302696	12302896	+	-0.09086799999999999	0.000527233198453547	mutated MAGGIE motif
chr11:12303354_G_A	chr11	12303254	12303454	+	-0.06244499999999997	0.00408544877114242	mutated MAGGIE motif
chr11:12303407_T_C	chr11	12303307	12303507	+	-0.06258899999999999	0.00408544877114242	mutated MAGGIE motif
chr11:12303489_T_G	chr11	12303389	12303589	+	-0.06829200000000002	0.0018451536807728398	mutated MAGGIE motif
chr11:12303521_C_T	chr11	12303421	12303621	+	-0.08081899999999997	0.0018451536807728398	mutated MAGGIE motif
chr11:12303660_G_A	chr11	12303560	12303760	+	-0.08090299999999995	0.0018451536807728398	mutated MAGGIE motif
chr11:12303938_T_C	chr11	12303838	12304038	+	-0.080978	0.0018451536807728398	mutated MAGGIE motif
chr11:12306437_G_A	chr11	12306337	12306537	+	0.05218299999999998	0.0152141833029173	mutated MAGGIE motif
chr11:123065683_C_T	chr11	123065583	123065783	+	0.10563999999999996	0.00323443889749279	mutated MAGGIE motif
chr11:123065730_C_A	chr11	123065630	123065830	+	-0.11482399999999998	0.00323443889749279	mutated MAGGIE motif
chr11:123066335_C_T	chr11	123066235	123066435	+	0.119653	0.0167550044493607	mutated MAGGIE motif
chr11:123066496_A_G	chr11	123066396	123066596	+	0.10078599999999993	0.0411536640426702	mutated MAGGIE motif
chr11:12307084_G_C	chr11	12306984	12307184	+	-0.055612	0.0277347213760692	mutated MAGGIE motif
chr11:12307472_CT_C	chr11	12307372	12307572	+	-0.08187299999999997	0.0018451536807728398	mutated MAGGIE motif
chr11:12309002_T_C	chr11	12308902	12309102	+	-0.05439099999999997	0.039835639601968	mutated MAGGIE motif
chr11:123302696_G_T	chr11	123302596	123302796	+	-0.16609100000000002	0.0184022456642101	mutated MAGGIE motif
chr11:123302788_C_G	chr11	123302688	123302888	+	-0.166072	0.0184022456642101	mutated MAGGIE motif
chr11:123302951_A_G	chr11	123302851	123303051	+	-0.165989	0.0184022456642101	mutated MAGGIE motif
chr11:123323426_C_G	chr11	123323326	123323526	+	-0.245908	0.000783002061181401	mutated MAGGIE motif
chr11:123324024_G_A	chr11	123323924	123324124	+	-0.24601399999999998	0.000783002061181401	mutated MAGGIE motif
chr11:123324221_C_T	chr11	123324121	123324321	+	-0.245908	0.000783002061181401	mutated MAGGIE motif
chr11:123324588_T_C	chr11	123324488	123324688	+	-0.24651700000000001	0.000783002061181401	mutated MAGGIE motif
chr11:123325012_A_C	chr11	123324912	123325112	+	0.3023600000000001	4.41313171337666e-07	mutated MAGGIE motif
chr11:123325653_G_A	chr11	123325553	123325753	+	-0.256021	0.00071660593629678	mutated MAGGIE motif
chr11:123692923_T_A	chr11	123692823	123693023	+	0.27859599999999995	0.000432751566464712	mutated MAGGIE motif
chr11:124705936_T_A	chr11	124705836	124706036	+	0.240015	6.09184393983666e-06	mutated MAGGIE motif
chr11:124706880_G_A	chr11	124706780	124706980	+	0.27467	3.7216627308230297e-07	mutated MAGGIE motif
chr11:124750028_A_T	chr11	124749928	124750128	+	0.10604999999999998	0.0103409042413379	mutated MAGGIE motif
chr11:124750137_A_G	chr11	124750037	124750237	+	-0.18584900000000001	0.00139710139405465	mutated MAGGIE motif
chr11:124751551_T_C	chr11	124751451	124751651	+	-0.151032	0.00186073091264816	mutated MAGGIE motif
chr11:124751881_C_T	chr11	124751781	124751981	+	-0.15055799999999994	0.00186073091264816	mutated MAGGIE motif
chr11:124752167_A_G	chr11	124752067	124752267	+	-0.147611	0.00186073091264816	mutated MAGGIE motif
chr11:124752816_G_T	chr11	124752716	124752916	+	-0.14763699999999996	0.00186073091264816	mutated MAGGIE motif
chr11:128524566_T_C	chr11	128524466	128524666	+	0.16363800000000006	0.0436916120020172	mutated MAGGIE motif
chr11:128527666_G_A	chr11	128527566	128527766	+	0.358441	3.82282518584453e-11	mutated MAGGIE motif
chr11:128527714_A_G	chr11	128527614	128527814	+	0.358452	3.82282518584453e-11	mutated MAGGIE motif
chr11:128528462_G_T	chr11	128528362	128528562	+	-0.210331	0.0135139554593501	mutated MAGGIE motif
chr11:128528614_A_T	chr11	128528514	128528714	+	0.22053000000000003	0.0007020702345839558	mutated MAGGIE motif
chr11:128528654_C_G	chr11	128528554	128528754	+	0.3584700000000001	3.82282518584453e-11	mutated MAGGIE motif
chr11:128528718_G_A	chr11	128528618	128528818	+	0.35393800000000003	1.008007924387e-10	mutated MAGGIE motif
chr11:128528813_T_C	chr11	128528713	128528913	+	-0.21062899999999998	0.0135139554593501	mutated MAGGIE motif
chr11:128529232_T_C	chr11	128529132	128529332	+	0.28656000000000004	2.6656226452377998e-05	mutated MAGGIE motif
chr11:128529493_T_C	chr11	128529393	128529593	+	0.292562	1.61578957441895e-05	mutated MAGGIE motif
chr11:128529802_T_C	chr11	128529702	128529902	+	0.35844599999999993	3.82282518584453e-11	mutated MAGGIE motif
chr11:128529952_A_G	chr11	128529852	128530052	+	0.3583430000000001	3.82282518584453e-11	mutated MAGGIE motif
chr11:129694326_G_A	chr11	129694226	129694426	+	0.10771099999999999	3.6226666739555386e-05	mutated MAGGIE motif
chr11:129694993_G_A	chr11	129694893	129695093	+	-0.057832	0.0413546934425717	mutated MAGGIE motif
chr11:129695615_T_C	chr11	129695515	129695715	+	0.06225500000000006	0.0190448729416481	mutated MAGGIE motif
chr11:129695884_G_T	chr11	129695784	129695984	+	0.10772099999999996	3.6226666739555386e-05	mutated MAGGIE motif
chr11:129696058_C_T	chr11	129695958	129696158	+	0.10776600000000004	3.6226666739555386e-05	mutated MAGGIE motif
chr11:129696300_T_C	chr11	129696200	129696400	+	0.1035020000000001	3.76277019492461e-05	mutated MAGGIE motif
chr11:129696689_A_G	chr11	129696589	129696789	+	0.10348599999999997	3.76277019492461e-05	mutated MAGGIE motif
chr11:129696804_G_A	chr11	129696704	129696904	+	0.10348599999999997	3.76277019492461e-05	mutated MAGGIE motif
chr11:129697006_T_A	chr11	129696906	129697106	+	-0.10786599999999996	0.00713958544984867	mutated MAGGIE motif
chr11:129697098_G_A	chr11	129696998	129697198	+	0.10343999999999998	3.76277019492461e-05	mutated MAGGIE motif
chr11:129697157_A_C	chr11	129697057	129697257	+	0.10370200000000007	3.76277019492461e-05	mutated MAGGIE motif
chr11:129697386_C_G	chr11	129697286	129697486	+	0.10351199999999994	3.76277019492461e-05	mutated MAGGIE motif
chr11:129697431_G_GT	chr11	129697331	129697531	+	0.10348599999999997	3.76277019492461e-05	mutated MAGGIE motif
chr11:129697432_C_T	chr11	129697332	129697532	+	0.10348599999999997	3.76277019492461e-05	mutated MAGGIE motif
[truncated: 19,635 more rows]
