# Supplementary material for: Systematic analysis of naturally occurring insertions and deletions that alter transcription factor spacing identifies tolerant and sensitive transcription factor pairs
Source: eLife. 2022 Jan 20;11:e70878. doi: 10.7554/eLife.70878 (PMC8809895; doi:10.7554/eLife.70878)
Supplement: Figure 4—source data 3. [file elife-70878-fig4-data3.csv]

VariantID	Chrom	Start	End	Strand	Effect size beta	Qvalue	group
chr17:27922275_A_G	chr17	27922175	27922375	+	-0.32069899999999996	0.000115201150193497	mutated ERG and p65 motif
chr4:3307638_C_G	chr4	3307538	3307738	+	-0.15212399999999998	0.00132125040853258	mutated ERG and p65 motif
chr8:40246554_A_G	chr8	40246454	40246654	+	0.27659500000000004	0.0031797788628290693	mutated ERG and p65 motif
chr10:90039357_A_AAGGAAATGAATCTC	chr10	90039257	90039457	+	0.27262800000000004	0.00086805097135898	mutated p65 motif
chr14:34523131_C_G	chr14	34523031	34523231	+	-0.166248	0.0325562644172324	mutated p65 motif
chr1:177753776_C_T	chr1	177753676	177753876	+	0.19879399999999992	0.0081890961218735	mutated p65 motif
chr1:42368035_A_G	chr1	42367935	42368135	+	0.10481200000000003	0.036426864427364	mutated p65 motif
chr20:2199055_G_GACACACACTTCTAAA	chr20	2198955	2199155	+	0.20986000000000005	0.0372536719570955	mutated p65 motif
chr22:23619461_C_T	chr22	23619361	23619561	+	0.17753399999999994	0.0286413281156716	mutated p65 motif
chr2:237855744_T_A	chr2	237855644	237855844	+	-0.102342	0.0448046283969824	mutated p65 motif
chr2:65308573_A_AAGC	chr2	65308473	65308673	+	0.125861	0.0378477172363446	mutated p65 motif
chr3:150222435_T_A	chr3	150222335	150222535	+	-0.193461	0.0204328227540145	mutated p65 motif
chr4:74959996_A_G	chr4	74959896	74960096	+	-0.15385700000000002	0.0054135903272619895	mutated p65 motif
chr5:105507543_G_A	chr5	105507443	105507643	+	0.17725200000000008	0.0187750739046286	mutated p65 motif
chr6:42210951_C_G	chr6	42210851	42211051	+	0.288813	0.00316621199236159	mutated p65 motif
chr9:2655702_T_C	chr9	2655602	2655802	+	0.15207399999999993	0.049489508570506	mutated p65 motif
chr10:29845316_A_G	chr10	29845216	29845416	+	0.17931799999999998	0.0405122110237145	mutated ERG motif
chr10:4746670_C_A	chr10	4746570	4746770	+	-0.171398	0.007630732911809679	mutated ERG motif
chr11:110268643_A_C	chr11	110268543	110268743	+	-0.12974600000000006	0.0497530622861169	mutated ERG motif
chr11:6115661_A_G	chr11	6115561	6115761	+	-0.197574	0.0021643567429779197	mutated ERG motif
chr12:106361242_T_C	chr12	106361142	106361342	+	0.163412	0.043413057004239	mutated ERG motif
chr12:120678381_A_G	chr12	120678281	120678481	+	0.20606099999999994	0.00143776042735116	mutated ERG motif
chr12:123178817_G_A	chr12	123178717	123178917	+	0.24346399999999999	0.00542734115905793	mutated ERG motif
chr12:19211642_T_C	chr12	19211542	19211742	+	0.19962	0.0109446600405418	mutated ERG motif
chr12:20527920_C_T	chr12	20527820	20528020	+	-0.165599	0.0376397667601758	mutated ERG motif
chr12:27315291_T_C	chr12	27315191	27315391	+	0.16731500000000002	0.0268925576498692	mutated ERG motif
chr14:20938251_A_C	chr14	20938151	20938351	+	-0.15929899999999994	0.043537522439066	mutated ERG motif
chr14:73132190_T_G	chr14	73132090	73132290	+	0.15499799999999994	0.0181452094156119	mutated ERG motif
chr15:58762377_G_C	chr15	58762277	58762477	+	0.15095800000000004	0.0456425724497519	mutated ERG motif
chr15:75346760_T_C	chr15	75346660	75346860	+	0.17365799999999998	0.0345825808705738	mutated ERG motif
chr18:47190835_A_G	chr18	47190735	47190935	+	-0.168053	0.0443023683712888	mutated ERG motif
chr18:59732274_G_A	chr18	59732174	59732374	+	-0.16780500000000004	0.0241193172618058	mutated ERG motif
chr19:35800662_G_T	chr19	35800562	35800762	+	-0.20766100000000004	0.0426952916841435	mutated ERG motif
chr19:46792652_A_G	chr19	46792552	46792752	+	0.137737	0.036545711796117014	mutated ERG motif
chr19:46854055_C_T	chr19	46853955	46854155	+	-0.240744	0.000491953862708313	mutated ERG motif
chr1:199274467_T_C	chr1	199274367	199274567	+	0.16933599999999993	0.0454034298585714	mutated ERG motif
chr1:22251260_C_T	chr1	22251160	22251360	+	0.09282200000000007	0.0438397296716296	mutated ERG motif
chr1:60243182_T_G	chr1	60243082	60243282	+	0.14972600000000005	0.0155256955412495	mutated ERG motif
chr1:66956685_G_A	chr1	66956585	66956785	+	0.21650000000000005	0.004300833430161971	mutated ERG motif
chr1:85785655_T_C	chr1	85785555	85785755	+	0.17157299999999998	0.0317683936398181	mutated ERG motif
chr1:86916824_G_A	chr1	86916724	86916924	+	-0.196121	0.0155986927396867	mutated ERG motif
chr1:92166931_C_T	chr1	92166831	92167031	+	-0.198373	0.00921893268188224	mutated ERG motif
chr20:37377139_C_T	chr20	37377039	37377239	+	0.240686	0.0010949374546921301	mutated ERG motif
chr22:23619440_C_G	chr22	23619340	23619540	+	0.17818999999999996	0.0286413281156716	mutated ERG motif
chr22:38077718_A_G	chr22	38077618	38077818	+	0.22579200000000002	0.00106560261526806	mutated ERG motif
chr2:153683596_A_C	chr2	153683496	153683696	+	0.24414899999999995	0.000523343234844058	mutated ERG motif
chr2:220311039_C_A	chr2	220310939	220311139	+	-0.15135099999999999	0.0448204061838351	mutated ERG motif
chr2:228440935_T_TC	chr2	228440835	228441035	+	-0.20134	0.0363729021524967	mutated ERG motif
chr2:238166147_G_A	chr2	238166047	238166247	+	-0.17772300000000002	0.0166376773696475	mutated ERG motif
chr2:54805587_C_T	chr2	54805487	54805687	+	-0.196104	0.0117772657263492	mutated ERG motif
chr3:14517115_T_C	chr3	14517015	14517215	+	0.27332900000000004	0.0024976893428665	mutated ERG motif
chr3:151859365_A_G	chr3	151859265	151859465	+	0.16254999999999994	0.0231462364639714	mutated ERG motif
chr3:23141408_A_G	chr3	23141308	23141508	+	0.119861	0.0455398705635283	mutated ERG motif
chr3:30197461_C_T	chr3	30197361	30197561	+	-0.230673	0.00149779412926969	mutated ERG motif
chr4:4258887_C_T	chr4	4258787	4258987	+	-0.26529	0.00043978598120535096	mutated ERG motif
chr4:90819786_C_G	chr4	90819686	90819886	+	-0.173155	0.0237428665442404	mutated ERG motif
chr5:143075183_C_T	chr5	143075083	143075283	+	0.186236	0.0344073201928099	mutated ERG motif
chr5:21847531_T_C	chr5	21847431	21847631	+	0.191593	0.0398967074770476	mutated ERG motif
chr5:62558371_G_A	chr5	62558271	62558471	+	-0.16257	0.0403142589704368	mutated ERG motif
chr6:152782933_G_A	chr6	152782833	152783033	+	-0.16939099999999996	0.00640083444073277	mutated ERG motif
chr6:43111445_C_T	chr6	43111345	43111545	+	-0.15984499999999996	0.0147116835057462	mutated ERG motif
chr6:54156793_G_GCTTC	chr6	54156693	54156893	+	-0.179135	0.0274378152378505	mutated ERG motif
chr6:6313540_G_T	chr6	6313440	6313640	+	0.150768	0.0492610346311121	mutated ERG motif
chr6:85759202_A_T	chr6	85759102	85759302	+	-0.217277	0.0056406670278046295	mutated ERG motif
chr7:22143478_G_A	chr7	22143378	22143578	+	-0.25011300000000003	0.000392448120034584	mutated ERG motif
chr7:23610440_A_G	chr7	23610340	23610540	+	0.207537	0.0043958883848052	mutated ERG motif
chr8:107447286_A_C	chr8	107447186	107447386	+	-0.111139	0.0402366115962424	mutated ERG motif
chr8:117049546_T_C	chr8	117049446	117049646	+	-0.156098	0.0175478219232943	mutated ERG motif
chr8:13230164_C_T	chr8	13230064	13230264	+	-0.15048699999999998	0.0363351628005282	mutated ERG motif
chr8:17466313_T_C	chr8	17466213	17466413	+	0.203836	0.0104349341384595	mutated ERG motif
chr8:17468580_G_C	chr8	17468480	17468680	+	0.186712	0.0260101482888999	mutated ERG motif
chr8:31143872_T_G	chr8	31143772	31143972	+	0.21298700000000004	0.00886908910413836	mutated ERG motif
chr8:61900319_G_C	chr8	61900219	61900419	+	0.21094899999999994	0.0447229747346	mutated ERG motif
chr8:73349526_T_G	chr8	73349426	73349626	+	0.17216200000000004	0.0379453447993581	mutated ERG motif
chr9:124331465_G_A	chr9	124331365	124331565	+	-0.190365	0.00355930449287667	mutated ERG motif
chr9:127029736_G_A	chr9	127029636	127029836	+	0.212229	0.00011424977327518101	mutated ERG motif
chr9:132253981_C_G	chr9	132253881	132254081	+	0.18246800000000007	0.0359725804971498	mutated ERG motif
chr9:18122252_C_T	chr9	18122152	18122352	+	0.207252	0.0018800937106232304	mutated ERG motif
chr10:103586356_G_A	chr10	103586256	103586456	+	-0.188572	0.0335786911309919	mutated MAGGIE motif
chr10:103734040_A_G	chr10	103733940	103734140	+	0.18003900000000006	0.0280356066731772	mutated MAGGIE motif
chr10:112357472_A_G	chr10	112357372	112357572	+	-0.189218	0.0123302947775743	mutated MAGGIE motif
chr10:15239498_A_G	chr10	15239398	15239598	+	-0.14702700000000002	0.0469432272566663	mutated MAGGIE motif
chr10:16933460_G_T	chr10	16933360	16933560	+	0.20075600000000005	0.0247064648287428	mutated MAGGIE motif
chr10:29871949_G_A	chr10	29871849	29872049	+	0.217703	0.0031405742375129	mutated MAGGIE motif
chr10:4746513_C_A	chr10	4746413	4746613	+	0.14700100000000005	0.007557429021057591	mutated MAGGIE motif
chr10:53790461_C_T	chr10	53790361	53790561	+	0.13878	0.0450926089117234	mutated MAGGIE motif
chr10:63220824_A_G	chr10	63220724	63220924	+	0.17183400000000004	0.0138147014086289	mutated MAGGIE motif
chr10:71579681_G_A	chr10	71579581	71579781	+	0.14353400000000005	0.0201284866496755	mutated MAGGIE motif
chr10:71589573_C_G	chr10	71589473	71589673	+	0.14856099999999994	0.0176566121464372	mutated MAGGIE motif
chr10:74934314_T_C	chr10	74934214	74934414	+	-0.16321599999999994	0.0298237889794358	mutated MAGGIE motif
chr10:90039355_A_AACAC	chr10	90039255	90039455	+	0.27262800000000004	0.00086805097135898	mutated MAGGIE motif
chr10:91959021_G_A	chr10	91958921	91959121	+	0.16066099999999994	0.031575040021656	mutated MAGGIE motif
chr11:10757334_A_G	chr11	10757234	10757434	+	0.19413	0.0339912842581418	mutated MAGGIE motif
chr11:107729615_G_T	chr11	107729515	107729715	+	-0.13554899999999998	0.0302755287387945	mutated MAGGIE motif
chr11:108741318_A_C	chr11	108741218	108741418	+	0.1899	0.0236492112228737	mutated MAGGIE motif
chr11:12009415_T_C	chr11	12009315	12009515	+	0.18687700000000007	0.0179311391005698	mutated MAGGIE motif
chr11:131898713_T_C	chr11	131898613	131898813	+	0.188936	0.00841007165182247	mutated MAGGIE motif
chr11:131898718_T_A	chr11	131898618	131898818	+	0.188947	0.00841007165182247	mutated MAGGIE motif
chr11:44590729_G_A	chr11	44590629	44590829	+	-0.12380200000000002	0.011806344767852	mutated MAGGIE motif
chr11:6115474_A_G	chr11	6115374	6115574	+	-0.197482	0.0021643567429779197	mutated MAGGIE motif
chr11:6115513_C_A	chr11	6115413	6115613	+	-0.197301	0.0021643567429779197	mutated MAGGIE motif
chr11:6115519_T_G	chr11	6115419	6115619	+	-0.19742600000000005	0.0021643567429779197	mutated MAGGIE motif
chr11:69974423_T_C	chr11	69974323	69974523	+	0.18929	0.011080200516073	mutated MAGGIE motif
chr11:69974480_A_G	chr11	69974380	69974580	+	0.189371	0.011080200516073	mutated MAGGIE motif
chr11:69974621_G_A	chr11	69974521	69974721	+	0.18935900000000008	0.011080200516073	mutated MAGGIE motif
chr11:71163420_A_G	chr11	71163320	71163520	+	0.13465300000000002	0.0460807611141961	mutated MAGGIE motif
chr11:71163476_T_C	chr11	71163376	71163576	+	-0.13216300000000006	0.0460807611141961	mutated MAGGIE motif
chr11:91358927_G_A	chr11	91358827	91359027	+	0.31496099999999994	0.000147751769817051	mutated MAGGIE motif
chr12:111831993_A_G	chr12	111831893	111832093	+	0.206499	0.00711036132996203	mutated MAGGIE motif
chr12:120729474_A_C	chr12	120729374	120729574	+	0.13949999999999996	0.0271062479719776	mutated MAGGIE motif
chr12:120729498_A_C	chr12	120729398	120729598	+	0.13911000000000007	0.0271062479719776	mutated MAGGIE motif
chr12:120729527_C_G	chr12	120729427	120729627	+	-0.11324800000000003	0.0271062479719776	mutated MAGGIE motif
chr12:120729530_C_A	chr12	120729430	120729630	+	0.139212	0.0271062479719776	mutated MAGGIE motif
chr12:120729714_T_C	chr12	120729614	120729814	+	-0.113309	0.0271062479719776	mutated MAGGIE motif
chr12:120729716_C_T	chr12	120729616	120729816	+	-0.113309	0.0271062479719776	mutated MAGGIE motif
chr12:122356293_G_C	chr12	122356193	122356393	+	-0.13198899999999994	0.00990977718131542	mutated MAGGIE motif
chr12:125582198_G_T	chr12	125582098	125582298	+	-0.218405	0.0396260868900209	mutated MAGGIE motif
chr12:20527912_T_C	chr12	20527812	20528012	+	0.20865900000000004	0.004649538360918521	mutated MAGGIE motif
chr12:46877389_A_T	chr12	46877289	46877489	+	0.160655	0.0218104793704159	mutated MAGGIE motif
chr12:46877429_A_G	chr12	46877329	46877529	+	0.16216200000000006	0.0218104793704159	mutated MAGGIE motif
chr12:51855727_A_G	chr12	51855627	51855827	+	0.20152499999999995	0.0248712625158303	mutated MAGGIE motif
chr12:51855774_T_TA	chr12	51855674	51855874	+	0.195217	0.0248712625158303	mutated MAGGIE motif
chr12:51855779_T_A	chr12	51855679	51855879	+	0.20871199999999998	0.0248712625158303	mutated MAGGIE motif
chr12:66673568_C_T	chr12	66673468	66673668	+	-0.15800399999999998	0.048989467202373	mutated MAGGIE motif
chr12:7276847_A_T	chr12	7276747	7276947	+	-0.204422	0.00610588204315595	mutated MAGGIE motif
chr12:77481323_C_G	chr12	77481223	77481423	+	0.219349	0.00496934149557501	mutated MAGGIE motif
chr12:77481412_C_T	chr12	77481312	77481512	+	0.201944	0.00699131778337394	mutated MAGGIE motif
chr12:77481430_T_G	chr12	77481330	77481530	+	0.219394	0.00496934149557501	mutated MAGGIE motif
chr12:77738350_T_G	chr12	77738250	77738450	+	0.19047400000000006	0.0417954940556341	mutated MAGGIE motif
chr12:79696550_C_T	chr12	79696450	79696650	+	0.20755900000000005	0.000487651126616458	mutated MAGGIE motif
chr12:93474847_G_C	chr12	93474747	93474947	+	-0.15973500000000002	0.0454982936757571	mutated MAGGIE motif
chr12:96867639_A_C	chr12	96867539	96867739	+	-0.206233	0.0144190298765946	mutated MAGGIE motif
chr13:107303906_T_G	chr13	107303806	107304006	+	0.20785299999999995	0.0436963626038646	mutated MAGGIE motif
chr13:31197683_C_T	chr13	31197583	31197783	+	-0.17070599999999994	0.00779270335218638	mutated MAGGIE motif
chr13:34302817_C_T	chr13	34302717	34302917	+	-0.16384899999999994	0.023579881161721	mutated MAGGIE motif
chr13:59930803_T_C	chr13	59930703	59930903	+	-0.16504100000000002	0.0169756319700594	mutated MAGGIE motif
chr13:72540157_G_A	chr13	72540057	72540257	+	-0.18345100000000006	0.0314828793895825	mutated MAGGIE motif
chr13:79238114_G_A	chr13	79238014	79238214	+	0.286354	7.669745931144141e-05	mutated MAGGIE motif
chr13:81152713_G_A	chr13	81152613	81152813	+	-0.15684899999999996	0.0428427611132467	mutated MAGGIE motif
chr13:81152743_T_G	chr13	81152643	81152843	+	-0.156646	0.0428427611132467	mutated MAGGIE motif
chr13:81152781_C_G	chr13	81152681	81152881	+	-0.15662800000000004	0.0428427611132467	mutated MAGGIE motif
chr14:103474291_T_G	chr14	103474191	103474391	+	0.19350100000000006	0.0208762250215189	mutated MAGGIE motif
chr14:105452221_T_TGCGGGGCCCGGGCCCGGGCCCAGGACAC	chr14	105452121	105452321	+	-0.15302300000000002	0.0357030007881005	mutated MAGGIE motif
chr14:59296247_C_T	chr14	59296147	59296347	+	-0.17702199999999996	0.0239064813418228	mutated MAGGIE motif
chr14:65546722_A_C	chr14	65546622	65546822	+	0.188094	0.0191632313988058	mutated MAGGIE motif
chr14:73131539_T_C	chr14	73131439	73131639	+	-0.16793600000000006	0.0272162463163453	mutated MAGGIE motif
chr14:74004595_C_T	chr14	74004495	74004695	+	-0.19205300000000006	0.0213725914679177	mutated MAGGIE motif
chr14:96765883_C_T	chr14	96765783	96765983	+	0.17363499999999998	0.0152228982408739	mutated MAGGIE motif
chr14:96765918_T_C	chr14	96765818	96766018	+	0.234745	0.00171372349456177	mutated MAGGIE motif
chr15:34199679_A_G	chr15	34199579	34199779	+	0.16329499999999994	0.0491250745669985	mutated MAGGIE motif
chr15:36127236_T_C	chr15	36127136	36127336	+	-0.21599899999999997	0.00433205285824386	mutated MAGGIE motif
chr15:46195665_C_G	chr15	46195565	46195765	+	0.14375899999999994	0.0198093640095113	mutated MAGGIE motif
chr15:46195714_C_G	chr15	46195614	46195814	+	0.17193500000000006	0.00533044986999201	mutated MAGGIE motif
chr15:46195845_T_C	chr15	46195745	46195945	+	0.172099	0.00533044986999201	mutated MAGGIE motif
chr15:59473180_T_G	chr15	59473080	59473280	+	-0.16499599999999998	0.0377126904164608	mutated MAGGIE motif
chr15:67036441_G_A	chr15	67036341	67036541	+	-0.16944399999999998	0.0222853039849222	mutated MAGGIE motif
chr15:70077063_A_C	chr15	70076963	70077163	+	0.18928	0.0260479455997036	mutated MAGGIE motif
chr15:72050139_C_T	chr15	72050039	72050239	+	0.19726400000000002	0.0198758604331565	mutated MAGGIE motif
chr15:72050163_C_G	chr15	72050063	72050263	+	-0.146748	0.042085903631394	mutated MAGGIE motif
chr15:92490217_C_T	chr15	92490117	92490317	+	-0.15146800000000002	0.0159983713500335	mutated MAGGIE motif
chr15:92490290_G_C	chr15	92490190	92490390	+	-0.153781	0.0159983713500335	mutated MAGGIE motif
chr15:95388467_A_C	chr15	95388367	95388567	+	-0.08124999999999999	0.0410206940269644	mutated MAGGIE motif
chr16:24712999_G_T	chr16	24712899	24713099	+	-0.16249999999999998	0.0101358654614536	mutated MAGGIE motif
chr16:24713104_A_G	chr16	24713004	24713204	+	-0.16252300000000006	0.0101358654614536	mutated MAGGIE motif
chr16:3313726_G_C	chr16	3313626	3313826	+	0.1655979999999999	0.0279566653664819	mutated MAGGIE motif
chr16:77421194_A_T	chr16	77421094	77421294	+	0.265285	0.0126768606445752	mutated MAGGIE motif
chr16:77619843_T_C	chr16	77619743	77619943	+	-0.13067	0.0435136105546132	mutated MAGGIE motif
chr17:15404812_T_C	chr17	15404712	15404912	+	-0.16372899999999999	0.0171636516501116	mutated MAGGIE motif
chr17:33650189_G_T	chr17	33650089	33650289	+	0.193059	0.049351809835828	mutated MAGGIE motif
chr17:64014951_G_A	chr17	64014851	64015051	+	-0.210536	0.0035485977733246297	mutated MAGGIE motif
chr17:7035911_C_T	chr17	7035811	7036011	+	-0.20357	0.0018908679288190894	mutated MAGGIE motif
chr17:70903286_T_C	chr17	70903186	70903386	+	-0.12906900000000002	0.0209916828903252	mutated MAGGIE motif
chr18:10927139_C_T	chr18	10927039	10927239	+	0.202291	0.000959400324892681	mutated MAGGIE motif
chr18:20138106_G_A	chr18	20138006	20138206	+	-0.12923900000000002	0.0391780368149658	mutated MAGGIE motif
chr18:33293807_C_T	chr18	33293707	33293907	+	-0.14726899999999998	0.0213938912964807	mutated MAGGIE motif
chr18:57181744_C_T	chr18	57181644	57181844	+	0.279516	3.11712212979253e-05	mutated MAGGIE motif
chr18:57181845_C_T	chr18	57181745	57181945	+	0.267574	3.11712212979253e-05	mutated MAGGIE motif
chr18:59732432_A_G	chr18	59732332	59732532	+	-0.14085699999999998	0.0241193172618058	mutated MAGGIE motif
chr19:19285989_A_T	chr19	19285889	19286089	+	-0.178286	0.0365568463003978	mutated MAGGIE motif
chr19:21512277_G_T	chr19	21512177	21512377	+	-0.15709299999999998	0.0264101147750237	mutated MAGGIE motif
chr19:32917455_T_A	chr19	32917355	32917555	+	-0.14987799999999998	0.0386439225564911	mutated MAGGIE motif
chr19:3332277_G_T	chr19	3332177	3332377	+	-0.171665	0.0267764711055992	mutated MAGGIE motif
chr19:3332278_C_T	chr19	3332178	3332378	+	-0.171665	0.0267764711055992	mutated MAGGIE motif
chr19:41833548_C_G	chr19	41833448	41833648	+	-0.17385500000000004	0.0163456483708927	mutated MAGGIE motif
chr19:46792666_C_T	chr19	46792566	46792766	+	0.137737	0.036545711796117014	mutated MAGGIE motif
chr19:46792673_A_C	chr19	46792573	46792773	+	0.137737	0.036545711796117014	mutated MAGGIE motif
chr19:7188979_A_G	chr19	7188879	7189079	+	-0.160582	0.0174669175890284	mutated MAGGIE motif
chr19:7189184_GAA_G	chr19	7189084	7189284	+	-0.184342	0.00522806783158033	mutated MAGGIE motif
chr1:153461298_T_C	chr1	153461198	153461398	+	-0.279447	0.00175243923118913	mutated MAGGIE motif
chr1:153590254_C_A	chr1	153590154	153590354	+	-0.190527	0.0331325479072902	mutated MAGGIE motif
chr1:15504403_T_G	chr1	15504303	15504503	+	0.1081439999999999	0.036316870875817	mutated MAGGIE motif
chr1:177752013_C_T	chr1	177751913	177752113	+	0.17847100000000005	0.0449828629496878	mutated MAGGIE motif
chr1:187660659_A_G	chr1	187660559	187660759	+	-0.179823	0.0195606729664751	mutated MAGGIE motif
chr1:199824875_A_G	chr1	199824775	199824975	+	-0.175767	0.0307285780814521	mutated MAGGIE motif
chr1:205240659_T_A	chr1	205240559	205240759	+	0.174933	0.0205653791730647	mutated MAGGIE motif
chr1:215456074_T_C	chr1	215455974	215456174	+	-0.18037800000000004	0.0418309595434277	mutated MAGGIE motif
chr1:227002878_C_T	chr1	227002778	227002978	+	0.11698099999999999	0.0403500566786119	mutated MAGGIE motif
chr1:241042131_T_C	chr1	241042031	241042231	+	0.20498300000000005	0.0144134675339317	mutated MAGGIE motif
chr1:246041416_C_T	chr1	246041316	246041516	+	-0.291698	2.2891349403468e-05	mutated MAGGIE motif
chr1:246041505_T_C	chr1	246041405	246041605	+	-0.291704	2.2891349403468e-05	mutated MAGGIE motif
chr1:45138199_A_G	chr1	45138099	45138299	+	0.149111	0.0118272819592741	mutated MAGGIE motif
chr1:59798758_A_G	chr1	59798658	59798858	+	0.23698200000000005	0.000185193374050867	mutated MAGGIE motif
chr1:60567437_A_G	chr1	60567337	60567537	+	-0.18378	0.0376603634448262	mutated MAGGIE motif
chr1:86916767_G_A	chr1	86916667	86916867	+	-0.192452	0.0155986927396867	mutated MAGGIE motif
chr1:90187184_G_A	chr1	90187084	90187284	+	-0.162929	0.0343885992598639	mutated MAGGIE motif
chr20:13228071_C_T	chr20	13227971	13228171	+	-0.205092	0.007344996951926	mutated MAGGIE motif
chr20:15684024_T_C	chr20	15683924	15684124	+	-0.235233	0.00512183280224444	mutated MAGGIE motif
chr20:49262156_T_C	chr20	49262056	49262256	+	-0.17013399999999998	0.0247712513753314	mutated MAGGIE motif
chr20:49262256_G_C	chr20	49262156	49262356	+	-0.17010399999999998	0.0247712513753314	mutated MAGGIE motif
chr20:55081489_T_TG	chr20	55081389	55081589	+	-0.17903800000000006	0.0153208863782158	mutated MAGGIE motif
chr20:5785074_C_A	chr20	5784974	5785174	+	0.129185	0.0419888999805863	mutated MAGGIE motif
chr20:5844122_A_G	chr20	5844022	5844222	+	0.12272700000000004	0.035377042025315004	mutated MAGGIE motif
chr20:60860944_C_T	chr20	60860844	60861044	+	-0.32559699999999997	4.333203661023851e-06	mutated MAGGIE motif
chr20:8626903_C_T	chr20	8626803	8627003	+	-0.16292	0.0375997220511913	mutated MAGGIE motif
chr21:18744069_A_G	chr21	18743969	18744169	+	-0.203461	0.00543175103017508	mutated MAGGIE motif
chr21:18744081_A_C	chr21	18743981	18744181	+	-0.204097	0.00543175103017508	mutated MAGGIE motif
chr21:27274089_T_G	chr21	27273989	27274189	+	-0.24585500000000005	0.00494854309471811	mutated MAGGIE motif
chr21:40225865_A_T	chr21	40225765	40225965	+	0.14621000000000006	0.0201730499327842	mutated MAGGIE motif
chr21:44867411_A_C	chr21	44867311	44867511	+	-0.170049	0.0199216102899291	mutated MAGGIE motif
chr21:44867547_C_T	chr21	44867447	44867647	+	-0.17018	0.0199216102899291	mutated MAGGIE motif
chr22:17469049_C_A	chr22	17468949	17469149	+	0.22287600000000007	0.0118452389902879	mutated MAGGIE motif
chr22:18393792_GA_G	chr22	18393692	18393892	+	-0.13622299999999998	0.0305198662191774	mutated MAGGIE motif
chr22:21006192_A_C	chr22	21006092	21006292	+	0.2498229999999999	0.000300988438713071	mutated MAGGIE motif
chr22:22484247_A_AC	chr22	22484147	22484347	+	-0.16638000000000006	0.0310288417880956	mutated MAGGIE motif
chr22:51094926_C_T	chr22	51094826	51095026	+	0.10365000000000002	0.0296394590044367	mutated MAGGIE motif
chr2:126979270_GCC_G	chr2	126979170	126979370	+	0.30225100000000005	0.00472078563600975	mutated MAGGIE motif
chr2:132262031_G_T	chr2	132261931	132262131	+	0.22253199999999995	0.0254836406160628	mutated MAGGIE motif
chr2:145704787_G_C	chr2	145704687	145704887	+	0.17476000000000005	0.0209903212515353	mutated MAGGIE motif
chr2:146156916_C_A	chr2	146156816	146157016	+	0.15293599999999996	0.0494567857984772	mutated MAGGIE motif
chr2:15310464_G_A	chr2	15310364	15310564	+	-0.11145500000000004	0.043659809879144	mutated MAGGIE motif
chr2:15310579_G_A	chr2	15310479	15310679	+	0.16097899999999998	0.0016173890606632	mutated MAGGIE motif
chr2:15310606_G_A	chr2	15310506	15310706	+	0.163895	0.0016173890606632	mutated MAGGIE motif
chr2:173267081_A_G	chr2	173266981	173267181	+	-0.16083699999999998	0.0316427527454231	mutated MAGGIE motif
chr2:178192926_C_T	chr2	178192826	178193026	+	-0.225901	0.0073313568486548	mutated MAGGIE motif
chr2:189185659_A_G	chr2	189185559	189185759	+	0.22366300000000008	0.00021040201102813999	mutated MAGGIE motif
chr2:189185665_G_C	chr2	189185565	189185765	+	0.223827	0.00021040201102813999	mutated MAGGIE motif
chr2:189185726_A_G	chr2	189185626	189185826	+	0.275305	3.519458220835029e-07	mutated MAGGIE motif
chr2:189185747_T_G	chr2	189185647	189185847	+	-0.184067	0.00204781266061961	mutated MAGGIE motif
chr2:189185755_G_A	chr2	189185655	189185855	+	-0.17730799999999994	0.00298693867037759	mutated MAGGIE motif
chr2:237855750_C_T	chr2	237855650	237855850	+	0.12855099999999994	0.0155030568070844	mutated MAGGIE motif
chr2:28817459_CTG_C	chr2	28817359	28817559	+	-0.14629200000000006	0.0235248838688758	mutated MAGGIE motif
chr2:33500848_A_G	chr2	33500748	33500948	+	-0.152055	0.0484000349331077	mutated MAGGIE motif
chr2:3383362_A_G	chr2	3383262	3383462	+	-0.137891	0.0353007119994408	mutated MAGGIE motif
chr2:42291028_A_G	chr2	42290928	42291128	+	0.202186	0.004991617783562339	mutated MAGGIE motif
chr2:42291037_T_C	chr2	42290937	42291137	+	0.202205	0.004991617783562339	mutated MAGGIE motif
chr2:43412531_T_C	chr2	43412431	43412631	+	-0.209436	0.00636441417586465	mutated MAGGIE motif
chr2:46424360_A_C	chr2	46424260	46424460	+	0.11479099999999998	0.0418365183094333	mutated MAGGIE motif
chr2:46424401_C_A	chr2	46424301	46424501	+	-0.11946799999999995	0.0418365183094333	mutated MAGGIE motif
chr2:64219311_T_C	chr2	64219211	64219411	+	-0.306549	0.000636798062848844	mutated MAGGIE motif
chr2:9830621_G_A	chr2	9830521	9830721	+	0.243109	0.0259394177468947	mutated MAGGIE motif
chr2:99036530_C_T	chr2	99036430	99036630	+	-0.261853	0.000120314086923251	mutated MAGGIE motif
chr2:99036683_A_G	chr2	99036583	99036783	+	-0.261975	0.000120314086923251	mutated MAGGIE motif
chr3:111643561_C_T	chr3	111643461	111643661	+	0.146501	0.0262318330775255	mutated MAGGIE motif
chr3:143021856_G_C	chr3	143021756	143021956	+	0.12095900000000005	0.0355420089663362	mutated MAGGIE motif
chr3:148995440_A_G	chr3	148995340	148995540	+	-0.140949	0.0335712684304687	mutated MAGGIE motif
chr3:148995585_G_C	chr3	148995485	148995685	+	-0.14192500000000002	0.0335712684304687	mutated MAGGIE motif
chr3:160856269_A_G	chr3	160856169	160856369	+	0.18457600000000007	0.00821507906113991	mutated MAGGIE motif
chr3:160856314_A_G	chr3	160856214	160856414	+	0.14690900000000007	0.0227305867177793	mutated MAGGIE motif
chr3:170918437_G_A	chr3	170918337	170918537	+	-0.164119	0.016682845672491998	mutated MAGGIE motif
chr3:170918519_T_A	chr3	170918419	170918619	+	-0.16416599999999998	0.016682845672491998	mutated MAGGIE motif
chr3:193807501_C_T	chr3	193807401	193807601	+	-0.15710599999999994	0.0406140121590226	mutated MAGGIE motif
chr3:194882937_G_A	chr3	194882837	194883037	+	-0.146571	0.0075580746714862404	mutated MAGGIE motif
chr3:23141325_A_T	chr3	23141225	23141425	+	0.11905900000000005	0.0455398705635283	mutated MAGGIE motif
chr3:27601615_G_A	chr3	27601515	27601715	+	-0.16186199999999998	0.00104147285030355	mutated MAGGIE motif
chr3:30126613_G_A	chr3	30126513	30126713	+	0.19083800000000006	0.0434926123790713	mutated MAGGIE motif
chr3:35363689_C_T	chr3	35363589	35363789	+	0.2337130000000001	0.00526877906933319	mutated MAGGIE motif
chr3:37572655_A_G	chr3	37572555	37572755	+	-0.16842199999999996	0.0179663088271423	mutated MAGGIE motif
chr3:37572690_G_A	chr3	37572590	37572790	+	-0.16835500000000006	0.0179663088271423	mutated MAGGIE motif
chr3:45466958_C_T	chr3	45466858	45467058	+	-0.179062	0.0454045647742882	mutated MAGGIE motif
chr3:61964487_A_G	chr3	61964387	61964587	+	0.17790499999999998	0.017197678439763	mutated MAGGIE motif
chr3:64177029_T_C	chr3	64176929	64177129	+	0.21940000000000004	0.00565125195392435	mutated MAGGIE motif
chr3:7918593_C_T	chr3	7918493	7918693	+	-0.15380700000000005	0.0189005841203061	mutated MAGGIE motif
chr3:7918785_G_A	chr3	7918685	7918885	+	-0.15411799999999998	0.0189005841203061	mutated MAGGIE motif
chr3:898136_A_C	chr3	898036	898236	+	0.20831999999999995	0.0113370246807864	mutated MAGGIE motif
chr3:898183_A_G	chr3	898083	898283	+	0.20828500000000005	0.0113370246807864	mutated MAGGIE motif
chr4:108614327_G_A	chr4	108614227	108614427	+	0.181168	0.00289030570222164	mutated MAGGIE motif
chr4:108614392_G_A	chr4	108614292	108614492	+	0.181049	0.00289030570222164	mutated MAGGIE motif
chr4:109802429_G_T	chr4	109802329	109802529	+	-0.159066	0.0036904909978703	mutated MAGGIE motif
chr4:109802534_A_G	chr4	109802434	109802634	+	-0.15902100000000002	0.0036904909978703	mutated MAGGIE motif
chr4:114900957_T_C	chr4	114900857	114901057	+	0.168165	0.000696455357250297	mutated MAGGIE motif
chr4:129522518_G_A	chr4	129522418	129522618	+	0.15990100000000007	0.0343944794087957	mutated MAGGIE motif
chr4:130436679_GAACCC_G	chr4	130436579	130436779	+	-0.122299	0.037041653774111	mutated MAGGIE motif
chr4:130436688_ATGTG_A	chr4	130436588	130436788	+	-0.122299	0.037041653774111	mutated MAGGIE motif
chr4:130436694_CAT_C	chr4	130436594	130436794	+	-0.122299	0.037041653774111	mutated MAGGIE motif
chr4:140632858_T_C	chr4	140632758	140632958	+	0.1746810000000001	0.0406816243071412	mutated MAGGIE motif
chr4:145478049_C_G	chr4	145477949	145478149	+	0.15018699999999996	0.0341726804111033	mutated MAGGIE motif
chr4:155929132_A_T	chr4	155929032	155929232	+	0.28715500000000005	5.33743198075656e-05	mutated MAGGIE motif
chr4:16419073_C_G	chr4	16418973	16419173	+	0.16104700000000005	0.0105998012215197	mutated MAGGIE motif
chr4:16727009_C_T	chr4	16726909	16727109	+	-0.148912	0.0169934592373515	mutated MAGGIE motif
chr4:169425259_C_G	chr4	169425159	169425359	+	-0.12254299999999994	0.0432517914542645	mutated MAGGIE motif
chr4:169425339_A_G	chr4	169425239	169425439	+	-0.16171999999999995	0.0143593440358209	mutated MAGGIE motif
chr4:185655487_G_T	chr4	185655387	185655587	+	0.09103500000000007	0.0470881434067895	mutated MAGGIE motif
chr4:38084483_T_G	chr4	38084383	38084583	+	0.194083	0.0482740365813861	mutated MAGGIE motif
chr4:38084484_T_A	chr4	38084384	38084584	+	0.194083	0.0482740365813861	mutated MAGGIE motif
chr4:4258900_C_T	chr4	4258800	4259000	+	0.287346	4.897934727652029e-05	mutated MAGGIE motif
chr4:48130185_T_C	chr4	48130085	48130285	+	0.12252299999999995	0.0282198012808797	mutated MAGGIE motif
chr4:5755542_C_A	chr4	5755442	5755642	+	-0.10756300000000002	0.0353310887335595	mutated MAGGIE motif
chr4:62999427_G_A	chr4	62999327	62999527	+	0.238166	0.0147192062361986	mutated MAGGIE motif
chr4:75258052_T_C	chr4	75257952	75258152	+	-0.230772	0.00322667688554097	mutated MAGGIE motif
chr4:76980163_G_T	chr4	76980063	76980263	+	0.20302	0.0067832974507856	mutated MAGGIE motif
chr4:86763901_T_C	chr4	86763801	86764001	+	0.140961	0.0349578842880161	mutated MAGGIE motif
chr5:107304805_C_T	chr5	107304705	107304905	+	0.19662100000000005	0.0363601969355995	mutated MAGGIE motif
chr5:124942918_A_G	chr5	124942818	124943018	+	-0.15766999999999998	0.0472354117778701	mutated MAGGIE motif
chr5:139147683_T_A	chr5	139147583	139147783	+	-0.15275700000000006	0.0238619791832883	mutated MAGGIE motif
chr5:178069682_A_T	chr5	178069582	178069782	+	0.15198999999999996	0.0384789088755758	mutated MAGGIE motif
chr5:178069708_G_A	chr5	178069608	178069808	+	-0.159269	0.0384789088755758	mutated MAGGIE motif
chr5:31384055_G_A	chr5	31383955	31384155	+	0.20766400000000007	0.0070509851757281595	mutated MAGGIE motif
chr5:33817083_C_T	chr5	33816983	33817183	+	-0.22515	0.000588032589249052	mutated MAGGIE motif
chr5:33817174_G_A	chr5	33817074	33817274	+	-0.225165	0.000588032589249052	mutated MAGGIE motif
chr5:43063266_A_G	chr5	43063166	43063366	+	0.17556400000000005	0.0418186161242533	mutated MAGGIE motif
chr5:62558448_T_C	chr5	62558348	62558548	+	-0.162491	0.0403142589704368	mutated MAGGIE motif
chr6:113983426_C_G	chr6	113983326	113983526	+	-0.16862899999999995	0.0359503688670799	mutated MAGGIE motif
chr6:148772998_G_A	chr6	148772898	148773098	+	-0.279458	3.40171717783242e-05	mutated MAGGIE motif
chr6:155235567_G_A	chr6	155235467	155235667	+	0.15255699999999994	0.0453379269202321	mutated MAGGIE motif
chr6:18497778_G_A	chr6	18497678	18497878	+	0.180937	0.0147357141196287	mutated MAGGIE motif
chr6:203909_A_G	chr6	203809	204009	+	-0.19250599999999998	0.0152511100956921	mutated MAGGIE motif
chr6:28104634_G_T	chr6	28104534	28104734	+	-0.12894	0.0324948710060303	mutated MAGGIE motif
chr6:3292317_A_C	chr6	3292217	3292417	+	0.24041099999999996	0.0029636717388439398	mutated MAGGIE motif
chr6:56096190_T_C	chr6	56096090	56096290	+	0.17413399999999998	0.0140929692394378	mutated MAGGIE motif
chr6:6313497_C_T	chr6	6313397	6313597	+	0.15000400000000005	0.0492610346311121	mutated MAGGIE motif
chr6:95258095_A_G	chr6	95257995	95258195	+	-0.201413	0.00305402948768232	mutated MAGGIE motif
chr7:152361799_C_T	chr7	152361699	152361899	+	-0.13734100000000002	0.021977687632918	mutated MAGGIE motif
chr7:157149921_C_T	chr7	157149821	157150021	+	-0.199935	0.014103479084077	mutated MAGGIE motif
chr7:157149929_C_T	chr7	157149829	157150029	+	-0.199935	0.014103479084077	mutated MAGGIE motif
chr7:157149933_C_T	chr7	157149833	157150033	+	-0.199935	0.014103479084077	mutated MAGGIE motif
chr7:157149937_C_T	chr7	157149837	157150037	+	-0.199935	0.014103479084077	mutated MAGGIE motif
chr7:157149941_C_T	chr7	157149841	157150041	+	-0.199935	0.014103479084077	mutated MAGGIE motif
chr7:157149945_C_T	chr7	157149845	157150045	+	-0.199935	0.014103479084077	mutated MAGGIE motif
chr7:157149949_C_T	chr7	157149849	157150049	+	-0.199935	0.014103479084077	mutated MAGGIE motif
chr7:157149953_C_T	chr7	157149853	157150053	+	-0.199935	0.014103479084077	mutated MAGGIE motif
chr7:25760403_A_T	chr7	25760303	25760503	+	0.23301999999999998	0.00661124113982826	mutated MAGGIE motif
chr8:102171455_G_A	chr8	102171355	102171555	+	0.13203999999999996	0.0179725800194339	mutated MAGGIE motif
chr8:107447405_G_A	chr8	107447305	107447505	+	-0.11099899999999996	0.0402366115962424	mutated MAGGIE motif
chr8:11619986_C_T	chr8	11619886	11620086	+	-0.127905	0.0458879710539931	mutated MAGGIE motif
chr8:11720227_G_C	chr8	11720127	11720327	+	-0.24288400000000002	0.00041364203350948396	mutated MAGGIE motif
chr8:120547682_T_C	chr8	120547582	120547782	+	-0.167041	0.0226636897204349	mutated MAGGIE motif
chr8:120868138_T_TC	chr8	120868038	120868238	+	0.121456	0.0485064875334139	mutated MAGGIE motif
chr8:125878998_A_G	chr8	125878898	125879098	+	-0.235713	0.00102608662657143	mutated MAGGIE motif
chr8:13230199_T_C	chr8	13230099	13230299	+	-0.14700100000000005	0.0363351628005282	mutated MAGGIE motif
chr8:145007534_C_T	chr8	145007434	145007634	+	-0.158993	0.0298208818999714	mutated MAGGIE motif
chr8:145008443_A_T	chr8	145008343	145008543	+	0.19328399999999998	0.0018357631950439602	mutated MAGGIE motif
chr8:17465824_C_T	chr8	17465724	17465924	+	0.30782	6.285255219916281e-06	mutated MAGGIE motif
chr8:17465862_A_G	chr8	17465762	17465962	+	0.171508	0.000873062257166303	mutated MAGGIE motif
chr8:17465943_T_A	chr8	17465843	17466043	+	0.17153600000000002	0.000873062257166303	mutated MAGGIE motif
chr8:17465956_C_T	chr8	17465856	17466056	+	0.17152900000000004	0.000873062257166303	mutated MAGGIE motif
chr8:17466384_G_A	chr8	17466284	17466484	+	0.19320500000000007	0.0104349341384595	mutated MAGGIE motif
chr8:17468605_A_G	chr8	17468505	17468705	+	0.186574	0.0260101482888999	mutated MAGGIE motif
chr8:29435714_C_A	chr8	29435614	29435814	+	0.12148199999999998	0.0438164006846475	mutated MAGGIE motif
chr8:31143798_A_G	chr8	31143698	31143898	+	0.212774	0.00886908910413836	mutated MAGGIE motif
chr8:31143893_T_C	chr8	31143793	31143993	+	0.21276199999999998	0.00886908910413836	mutated MAGGIE motif
chr8:41009368_G_A	chr8	41009268	41009468	+	-0.152962	0.0472537217873651	mutated MAGGIE motif
chr8:62672876_A_C	chr8	62672776	62672976	+	0.13158400000000006	0.0325807607632365	mutated MAGGIE motif
chr8:6338664_T_G	chr8	6338564	6338764	+	-0.16902899999999998	0.0436990492671377	mutated MAGGIE motif
chr8:64499604_C_T	chr8	64499504	64499704	+	0.193245	0.0143508824899938	mutated MAGGIE motif
chr8:73349652_A_G	chr8	73349552	73349752	+	0.17215900000000006	0.0379453447993581	mutated MAGGIE motif
chr8:8646633_G_A	chr8	8646533	8646733	+	0.213329	0.0115275087833255	mutated MAGGIE motif
chr8:95875676_A_G	chr8	95875576	95875776	+	0.214641	0.0009827339469284991	mutated MAGGIE motif
chr8:9688507_G_T	chr8	9688407	9688607	+	-0.16120600000000002	0.0281853878640746	mutated MAGGIE motif
chr8:9688519_G_A	chr8	9688419	9688619	+	-0.161709	0.0281853878640746	mutated MAGGIE motif
chr9:127029630_A_G	chr9	127029530	127029730	+	0.212515	0.00011424977327518101	mutated MAGGIE motif
chr9:129236624_A_G	chr9	129236524	129236724	+	0.290091	0.0010035704890829099	mutated MAGGIE motif
chr9:132305715_G_T	chr9	132305615	132305815	+	-0.196896	0.013139763865674	mutated MAGGIE motif
chr9:13804605_C_G	chr9	13804505	13804705	+	0.27426700000000004	0.000308134239804914	mutated MAGGIE motif
chr9:13804667_A_G	chr9	13804567	13804767	+	-0.23201700000000006	0.0017716837169026	mutated MAGGIE motif
chr9:17635689_A_G	chr9	17635589	17635789	+	-0.14846199999999998	0.0489479290437414	mutated MAGGIE motif
chr9:18122260_A_G	chr9	18122160	18122360	+	-0.207309	0.0018800937106232304	mutated MAGGIE motif
chr9:2655520_G_A	chr9	2655420	2655620	+	0.138818	0.049489508570506	mutated MAGGIE motif
chr9:3332888_T_C	chr9	3332788	3332988	+	-0.170995	0.0354687355681924	mutated MAGGIE motif
chr9:3333121_C_A	chr9	3333021	3333221	+	-0.17067899999999994	0.0354687355681924	mutated MAGGIE motif
chr9:35908183_C_T	chr9	35908083	35908283	+	-0.15303599999999998	0.0323018208833126	mutated MAGGIE motif
chr9:35908314_G_A	chr9	35908214	35908414	+	-0.15286	0.0323018208833126	mutated MAGGIE motif
chr9:90132041_G_GAA	chr9	90131941	90132141	+	0.16076599999999994	0.0324066668368832	mutated MAGGIE motif
chr9:90132129_A_G	chr9	90132029	90132229	+	0.16075599999999998	0.0324066668368832	mutated MAGGIE motif
chr9:90132149_A_G	chr9	90132049	90132249	+	0.160829	0.0324066668368832	mutated MAGGIE motif
chr9:92171670_A_T	chr9	92171570	92171770	+	-0.197364	0.0148489984118639	mutated MAGGIE motif
chr9:99056004_A_C	chr9	99055904	99056104	+	0.249003	0.000324455887521293	mutated MAGGIE motif
chr12:19211589_A_AT	chr12	19211489	19211689	+	-0.188158	0.0153336258007734	altered spacing
chr16:88514350_C_CA	chr16	88514250	88514450	+	0.133478	0.0357455500132601	altered spacing
chr1:64786234_T_TC	chr1	64786134	64786334	+	0.15373000000000006	0.048845770509560994	altered spacing
chr20:2199055_G_GCCACACACTTCTAAA	chr20	2198955	2199155	+	-0.194938	0.0372536719570955	altered spacing
chr4:130436699_C_CT	chr4	130436599	130436799	+	-0.122299	0.037041653774111	altered spacing
chr4:146764376_G_GA	chr4	146764276	146764476	+	0.118328	0.0313448565191692	altered spacing
chr7:157149909_C_CT	chr7	157149809	157150009	+	-0.199935	0.014103479084077	altered spacing
chr16:21088023_A_C	chr16	21087923	21088123	+	0.17143799999999998	0.0289280921409427	other
chr15:46195794_T_C	chr15	46195694	46195894	+	0.17221600000000006	0.00533044986999201	other
chr4:185021580_C_T	chr4	185021480	185021680	+	-0.16858099999999998	0.0323323257805325	other
chr14:103474135_A_AAGC	chr14	103474035	103474235	+	0.19358599999999992	0.0208762250215189	other
chr2:128848659_A_G	chr2	128848559	128848759	+	0.12321400000000005	0.0296074954492723	other
chr18:47212159_G_A	chr18	47212059	47212259	+	0.10061399999999998	0.0434579868429219	other
chr16:21088031_C_T	chr16	21087931	21088131	+	0.1973600000000001	0.0276644815645681	other
chr10:29273575_G_A	chr10	29273475	29273675	+	0.13139499999999993	0.02925014031738	other
chr8:117049503_C_A	chr8	117049403	117049603	+	-0.156007	0.0175478219232943	other
chr6:203878_C_T	chr6	203778	203978	+	-0.192696	0.0152511100956921	other
chr4:114900928_T_A	chr4	114900828	114901028	+	0.18721	0.000356040099800313	other
chr2:223719724_A_T	chr2	223719624	223719824	+	0.24381200000000006	0.0018554884281792895	other
chr8:125879019_A_G	chr8	125878919	125879119	+	0.217036	0.00139057167001707	other
chr6:164752315_A_G	chr6	164752215	164752415	+	0.14024499999999995	0.0455620475437672	other
chr20:47546089_CATA_C	chr20	47545989	47546189	+	-0.12604499999999996	0.0489833164163365	other
chr2:54614350_T_A	chr2	54614250	54614450	+	0.15414300000000006	0.0290154808453276	other
chr2:64219268_C_G	chr2	64219168	64219368	+	-0.16697499999999998	0.0445417853506782	other
chr12:108154937_C_G	chr12	108154837	108155037	+	-0.181695	0.00512920609541455	other
chr2:167992286_T_C	chr2	167992186	167992386	+	0.14334599999999995	0.031189915165028	other
chr4:39070630_T_C	chr4	39070530	39070730	+	-0.173085	0.028471819129566	other
chr14:73132029_C_T	chr14	73131929	73132129	+	0.15123199999999992	0.0181452094156119	other
chr4:3307373_A_G	chr4	3307273	3307473	+	-0.15210999999999994	0.00132125040853258	other
chr1:246041721_A_G	chr1	246041621	246041821	+	0.19912	0.0248745249554324	other
chr15:46195780_A_G	chr15	46195680	46195880	+	0.172138	0.00533044986999201	other
chr8:13230172_T_C	chr8	13230072	13230272	+	-0.14676300000000006	0.0363351628005282	other
chr22:17469026_G_A	chr22	17468926	17469126	+	0.213259	0.0118452389902879	other
chr2:21267782_T_C	chr2	21267682	21267882	+	0.15765699999999996	0.0244457570902621	other
chr8:31143783_G_T	chr8	31143683	31143883	+	0.21278599999999992	0.00886908910413836	other
chr3:171394825_C_T	chr3	171394725	171394925	+	-0.246392	0.000666897779199013	other
chr2:192530151_A_T	chr2	192530051	192530251	+	0.14704300000000006	0.009070714302100793	other
chr16:57334553_T_G	chr16	57334453	57334653	+	0.128224	0.0469769687035474	other
chr14:89823216_C_T	chr14	89823116	89823316	+	0.24403	0.0027767648709007	other
chr13:106803614_C_T	chr13	106803514	106803714	+	0.19769799999999996	0.0186580232749181	other
chr1:154373231_T_C	chr1	154373131	154373331	+	0.13775800000000005	0.0318717032464967	other
chr15:46195706_C_T	chr15	46195606	46195806	+	0.172041	0.00533044986999201	other
chr8:62672894_C_T	chr8	62672794	62672994	+	0.15216200000000002	0.0325807607632365	other
chr2:128848651_C_G	chr2	128848551	128848751	+	-0.12321300000000003	0.0296074954492723	other
chr6:137082948_A_G	chr6	137082848	137083048	+	-0.154275	0.0277119472019096	other
chr4:130436700_C_T	chr4	130436600	130436800	+	-0.122299	0.037041653774111	other
chr9:90132079_C_G	chr9	90131979	90132179	+	0.160478	0.0324066668368832	other
chr2:231304526_T_C	chr2	231304426	231304626	+	0.12141400000000002	0.0419640318230163	other
chr2:145704777_T_G	chr2	145704677	145704877	+	-0.159549	0.0209903212515353	other
chr7:157150024_C_T	chr7	157149924	157150124	+	-0.233417	0.0103387877458299	other
chr7:90321835_C_T	chr7	90321735	90321935	+	0.15564299999999998	0.0434444624550109	other
chr16:22203948_C_T	chr16	22203848	22204048	+	0.08652599999999999	0.0472922550722115	other
chr11:7079261_A_G	chr11	7079161	7079361	+	-0.15674899999999994	0.0131872300779057	other
chr19:35485637_C_G	chr19	35485537	35485737	+	0.17017799999999994	0.0220808971468289	other
chr8:124934558_T_C	chr8	124934458	124934658	+	-0.15352100000000002	0.0192578592831953	other
chr3:148995541_C_T	chr3	148995441	148995641	+	-0.14227499999999998	0.0335712684304687	other
chr12:108155128_C_G	chr12	108155028	108155228	+	-0.181839	0.00512920609541455	other
chr13:44389479_T_G	chr13	44389379	44389579	+	-0.21456	0.00280917466689991	other
chr17:4737042_T_C	chr17	4736942	4737142	+	0.163424	0.0442534350657581	other
chr1:223895559_G_A	chr1	223895459	223895659	+	-0.16185900000000006	0.0307638420711295	other
chr4:114900924_G_C	chr4	114900824	114901024	+	-0.187802	0.000356040099800313	other
chr12:122356370_G_C	chr12	122356270	122356470	+	-0.15364	0.00212774143115806	other
chr15:72050181_A_G	chr15	72050081	72050281	+	0.179419	0.0288160185866313	other
chr20:5785039_T_TA	chr20	5784939	5785139	+	0.129683	0.0419888999805863	other
chr2:128848652_C_G	chr2	128848552	128848752	+	0.12219399999999993	0.0296074954492723	other
chr2:177508622_G_C	chr2	177508522	177508722	+	0.168817	0.0496617690592981	other
chr6:4459365_T_TGA	chr6	4459265	4459465	+	0.16080799999999995	0.0197435153533218	other
chr2:126979222_G_A	chr2	126979122	126979322	+	0.25816100000000003	0.00965814369729338	other
chr4:90816023_A_G	chr4	90815923	90816123	+	-0.094018	0.0478572390110327	other
chr12:109125340_C_A	chr12	109125240	109125440	+	0.11797200000000008	0.0438163494421431	other
chr4:185021627_C_A	chr4	185021527	185021727	+	-0.16830500000000004	0.0323323257805325	other
chr16:57334360_T_C	chr16	57334260	57334460	+	0.165616	0.0144160743537398	other
chr1:235057739_G_C	chr1	235057639	235057839	+	0.169597	0.0302797573864113	other
chr12:120729718_G_A	chr12	120729618	120729818	+	-0.11324299999999997	0.0271062479719776	other
chr11:76405872_T_C	chr11	76405772	76405972	+	0.1459060000000001	0.0386759508008306	other
chr15:100652078_T_G	chr15	100651978	100652178	+	0.220229	0.0119620952851012	other
chr5:170922309_AGAGG_A	chr5	170922209	170922409	+	-0.124867	0.0480458666298781	other
chr2:54805607_T_C	chr2	54805507	54805707	+	-0.196089	0.0117772657263492	other
chr1:64786404_G_T	chr1	64786304	64786504	+	0.16676899999999995	0.048845770509560994	other
chr18:47211860_G_C	chr18	47211760	47211960	+	0.10801499999999996	0.0434579868429219	other
chr5:149380159_G_C	chr5	149380059	149380259	+	-0.13773000000000002	0.0481446246650353	other
chr9:92171601_A_C	chr9	92171501	92171701	+	-0.16338200000000005	0.0368783813046619	other
chr19:35485565_GGA_G	chr19	35485465	35485665	+	0.18748	0.0220808971468289	other
chr9:17635712_G_A	chr9	17635612	17635812	+	-0.155935	0.0351481744615869	other
chr5:33817078_T_A	chr5	33816978	33817178	+	-0.22515900000000003	0.000588032589249052	other
chr6:54156765_T_C	chr6	54156665	54156865	+	-0.17899299999999996	0.0274378152378505	other
chr13:31482859_C_T	chr13	31482759	31482959	+	0.14025500000000002	0.0188652961497949	other
chr20:6693076_T_C	chr20	6692976	6693176	+	0.16548600000000002	0.0196304774687968	other
chr11:110268541_C_G	chr11	110268441	110268641	+	-0.13133899999999998	0.0497530622861169	other
chr10:53678982_A_T	chr10	53678882	53679082	+	-0.24648600000000004	0.000507550668353637	other
chr2:99036802_A_C	chr2	99036702	99036902	+	-0.261961	0.000120314086923251	other
chr12:19211728_C_A	chr12	19211628	19211828	+	0.19924600000000006	0.0109446600405418	other
chr1:153461432_C_T	chr1	153461332	153461532	+	-0.27936399999999995	0.00175243923118913	other
chr18:20138208_G_T	chr18	20138108	20138308	+	0.149509	0.0277624071447257	other
chr1:153461375_A_G	chr1	153461275	153461475	+	-0.279546	0.00175243923118913	other
chr9:35908306_C_T	chr9	35908206	35908406	+	-0.15286	0.0323018208833126	other
chr8:19584333_G_C	chr8	19584233	19584433	+	0.13848000000000005	0.0405147928291016	other
chr8:141100784_T_C	chr8	141100684	141100884	+	0.11880400000000002	0.0493798945422951	other
chr20:60860916_G_A	chr20	60860816	60861016	+	-0.325565	4.333203661023851e-06	other
chr22:22484249_A_G	chr22	22484149	22484349	+	-0.16641	0.0310288417880956	other
chr3:131067947_C_T	chr3	131067847	131068047	+	0.15361899999999995	0.0394398390717162	other
chr8:17465760_C_A	chr8	17465660	17465860	+	0.3078380000000001	6.285255219916281e-06	other
chr2:3383538_C_A	chr2	3383438	3383638	+	-0.13433599999999998	0.0353007119994408	other
chr6:54156744_G_C	chr6	54156644	54156844	+	-0.17880999999999994	0.0274378152378505	other
chr13:31197565_A_G	chr13	31197465	31197665	+	-0.17066099999999998	0.00779270335218638	other
chr2:192530152_C_A	chr2	192530052	192530252	+	0.14703299999999994	0.009070714302100793	other
chr5:143075310_C_T	chr5	143075210	143075410	+	0.15171599999999996	0.0493807387142523	other
chr10:112357518_A_T	chr10	112357418	112357618	+	0.16933199999999993	0.0123302947775743	other
chr11:107729561_T_C	chr11	107729461	107729661	+	0.15659	0.0255435026209419	other
chr5:173038580_C_A	chr5	173038480	173038680	+	-0.180685	0.0370351633224692	other
chr7:157149913_C_T	chr7	157149813	157150013	+	-0.199935	0.014103479084077	other
chr8:120868328_C_G	chr8	120868228	120868428	+	0.120896	0.0485064875334139	other
chr3:45466897_A_G	chr3	45466797	45466997	+	-0.14044500000000001	0.049319488703028	other
chr4:13629437_G_T	chr4	13629337	13629537	+	-0.111771	0.0445416951686615	other
chr16:77620059_C_T	chr16	77619959	77620159	+	-0.13069999999999998	0.0435136105546132	other
chr16:90088904_C_G	chr16	90088804	90089004	+	-0.10097099999999998	0.0303315679733504	other
chr16:57334521_A_G	chr16	57334421	57334621	+	0.13606700000000005	0.0401701374538922	other
chr2:54614368_T_C	chr2	54614268	54614468	+	0.15308500000000005	0.0290154808453276	other
chr5:76110217_G_A	chr5	76110117	76110317	+	0.15419399999999994	0.0376165115216765	other
chr13:40705425_C_A	chr13	40705325	40705525	+	0.186353	0.0038122823393266897	other
chr8:17468708_C_T	chr8	17468608	17468808	+	0.18651000000000006	0.0260101482888999	other
chr1:201611324_T_C	chr1	201611224	201611424	+	0.17806499999999992	0.0128598108806449	other
chr1:201611332_T_C	chr1	201611232	201611432	+	0.17851499999999998	0.0128598108806449	other
chr16:3313611_A_C	chr16	3313511	3313711	+	0.14941600000000002	0.0279566653664819	other
chr3:61964568_G_T	chr3	61964468	61964668	+	0.17167000000000002	0.017197678439763	other
chr11:111944901_C_T	chr11	111944801	111945001	+	-0.14631	0.007680871742641999	other
chr16:57334331_A_C	chr16	57334231	57334431	+	0.16511999999999993	0.0144160743537398	other
chr4:90819569_T_C	chr4	90819469	90819669	+	-0.14795899999999998	0.0396225045545345	other
chr9:3332974_G_A	chr9	3332874	3333074	+	-0.17067899999999994	0.0354687355681924	other
chr2:42291069_T_C	chr2	42290969	42291169	+	0.20208400000000004	0.004991617783562339	other
chr17:6160792_A_G	chr17	6160692	6160892	+	0.19356500000000001	0.00895699349275173	other
chr10:61321621_G_A	chr10	61321521	61321721	+	0.15883100000000006	0.028957175803331	other
chr8:62672875_A_G	chr8	62672775	62672975	+	0.13159300000000007	0.0325807607632365	other
chr12:68931060_T_C	chr12	68930960	68931160	+	0.18845	0.00946389397717151	other
chr3:27601516_C_G	chr3	27601416	27601616	+	0.10313100000000007	0.0108074626671633	other
chr1:112056416_C_T	chr1	112056316	112056516	+	-0.157049	0.0189085515935493	other
chr6:23316593_T_C	chr6	23316493	23316693	+	-0.18401900000000002	0.0213978000858377	other
chr22:41578065_A_G	chr22	41577965	41578165	+	0.24239000000000002	0.000142293851376145	other
chr4:76980179_T_C	chr4	76980079	76980279	+	0.20286600000000002	0.0067832974507856	other
chr3:27601508_C_A	chr3	27601408	27601608	+	0.10313000000000004	0.0108074626671633	other
chr4:75258020_C_T	chr4	75257920	75258120	+	-0.23136700000000002	0.00322667688554097	other
chr19:3332330_C_T	chr19	3332230	3332430	+	-0.185587	0.0267764711055992	other
chr12:109125339_G_A	chr12	109125239	109125439	+	0.117969	0.0438163494421431	other
chr19:7189375_T_C	chr19	7189275	7189475	+	-0.183906	0.00522806783158033	other
chr10:74934442_C_T	chr10	74934342	74934542	+	-0.16350599999999998	0.0298237889794358	other
chr14:96765854_A_G	chr14	96765754	96765954	+	0.23483199999999996	0.00171372349456177	other
chr19:3332288_C_T	chr19	3332188	3332388	+	-0.16156099999999998	0.0267764711055992	other
chr12:108155108_G_A	chr12	108155008	108155208	+	-0.181862	0.00512920609541455	other
chr1:8938057_T_C	chr1	8937957	8938157	+	0.15516300000000005	0.034605895133364	other
chr10:49678456_G_C	chr10	49678356	49678556	+	-0.148169	0.0283940614439339	other
chr20:5784997_CTA_C	chr20	5784897	5785097	+	0.15250200000000005	0.0419888999805863	other
chr15:40600198_G_C	chr15	40600098	40600298	+	-0.177107	0.0208965739938475	other
chr3:61964391_G_A	chr3	61964291	61964491	+	0.172203	0.017197678439763	other
chr12:77738374_C_T	chr12	77738274	77738474	+	0.18980699999999995	0.0417954940556341	other
chr17:64015044_C_T	chr17	64014944	64015144	+	-0.21060300000000004	0.0035485977733246297	other
chr1:92035303_G_A	chr1	92035203	92035403	+	0.10258699999999997	0.0466685771021358	other
chr11:111317349_A_AACACAC	chr11	111317249	111317449	+	-0.11354200000000005	0.0454840064765055	other
chr12:96867586_A_G	chr12	96867486	96867686	+	-0.206275	0.0144190298765946	other
chr19:46792871_C_T	chr19	46792771	46792971	+	0.13793999999999995	0.036545711796117014	other
chr2:241852738_G_A	chr2	241852638	241852838	+	0.17533299999999996	0.0207627697666368	other
chr2:54805443_G_T	chr2	54805343	54805543	+	-0.195929	0.0117772657263492	other
chr19:21512191_C_G	chr19	21512091	21512291	+	-0.157219	0.0264101147750237	other
chr19:49651790_G_A	chr19	49651690	49651890	+	-0.13346599999999995	0.0395353938609974	other
chr5:173038546_A_C	chr5	173038446	173038646	+	-0.178305	0.0370351633224692	other
chr4:114900921_G_A	chr4	114900821	114901021	+	-0.187824	0.000356040099800313	other
chr20:5785194_C_T	chr20	5785094	5785294	+	0.12959300000000007	0.0419888999805863	other
chr3:148995528_G_T	chr3	148995428	148995628	+	-0.140577	0.0335712684304687	other
chr8:145008342_C_A	chr8	145008242	145008442	+	0.15108699999999994	0.0091276508702144	other
chr5:176889530_C_A	chr5	176889430	176889630	+	-0.127498	0.0383964134781488	other
chr5:173038536_A_G	chr5	173038436	173038636	+	-0.178311	0.0370351633224692	other
chr10:14002044_C_A	chr10	14001944	14002144	+	-0.15508699999999995	0.0477178513576629	other
chr8:29435834_A_G	chr8	29435734	29435934	+	0.11832299999999996	0.0438164006846475	other
chr9:99055991_G_A	chr9	99055891	99056091	+	-0.17915899999999998	0.0131036192298838	other
chr5:141931449_G_A	chr5	141931349	141931549	+	0.13278599999999996	0.0443110833180896	other
chr6:15998368_G_A	chr6	15998268	15998468	+	0.2601399999999999	0.000178315621048464	other
chr6:89200843_C_T	chr6	89200743	89200943	+	0.21603800000000006	0.00906631117114137	other
chr19:3332290_T_C	chr19	3332190	3332390	+	-0.16156099999999998	0.0267764711055992	other
chr20:15684087_T_C	chr20	15683987	15684187	+	-0.22218000000000004	0.00876418581225626	other
chr1:201611318_C_T	chr1	201611218	201611418	+	0.18791499999999994	0.0128598108806449	other
chr20:55081256_G_A	chr20	55081156	55081356	+	-0.17902600000000002	0.0153208863782158	other
chr2:42291087_G_C	chr2	42290987	42291187	+	0.22720100000000001	0.004991617783562339	other
