# Supplementary material for: Systematic analysis of naturally occurring insertions and deletions that alter transcription factor spacing identifies tolerant and sensitive transcription factor pairs
Source: eLife. 2022 Jan 20;11:e70878. doi: 10.7554/eLife.70878 (PMC8809895; doi:10.7554/eLife.70878)
Supplement: Figure 4—source data 4. [file elife-70878-fig4-data4.csv]

VariantID	Chrom	Start	End	Strand	Effect size beta	Qvalue	group
chr10:115314120_T_C	chr10	115314020	115314220	+	-0.06772799999999995	0.0488102726730339	mutated ERG and p65 motif
chr10:31101541_G_T	chr10	31101441	31101641	+	0.045929000000000005	3.06359848086524e-05	mutated ERG and p65 motif
chr11:123066082_T_A	chr11	123065982	123066182	+	0.07661499999999999	0.0143438419686688	mutated ERG and p65 motif
chr12:42538119_G_A	chr12	42538019	42538219	+	-0.12105100000000002	0.0398538321428565	mutated ERG and p65 motif
chr12:76256881_T_C	chr12	76256781	76256981	+	0.10478900000000002	0.0086597744748208	mutated ERG and p65 motif
chr13:108027956_G_A	chr13	108027856	108028056	+	-0.05811499999999997	0.0487363730552851	mutated ERG and p65 motif
chr13:43952370_C_T	chr13	43952270	43952470	+	-0.116979	0.0121869990113451	mutated ERG and p65 motif
chr13:44875052_G_A	chr13	44874952	44875152	+	-0.227215	2.6581614453748802e-05	mutated ERG and p65 motif
chr15:39005781_G_A	chr15	39005681	39005881	+	0.260725	7.83830244598995e-11	mutated ERG and p65 motif
chr15:39292501_A_G	chr15	39292401	39292601	+	-0.04574499999999998	0.0399719022696109	mutated ERG and p65 motif
chr15:39292502_A_C	chr15	39292402	39292602	+	-0.045742000000000005	0.0399719022696109	mutated ERG and p65 motif
chr15:67026566_T_G	chr15	67026466	67026666	+	0.08021099999999992	0.0068733845917412	mutated ERG and p65 motif
chr15:71081050_T_C	chr15	71080950	71081150	+	0.25675800000000004	2.99881255417157e-06	mutated ERG and p65 motif
chr15:71678963_T_G	chr15	71678863	71679063	+	0.12885600000000008	0.0453346780104133	mutated ERG and p65 motif
chr15:72009193_T_C	chr15	72009093	72009293	+	0.20528	0.0015706270996074304	mutated ERG and p65 motif
chr16:16099878_G_A	chr16	16099778	16099978	+	-0.13573800000000005	4.7986019615012985e-16	mutated ERG and p65 motif
chr16:3152233_C_T	chr16	3152133	3152333	+	-0.09172800000000003	0.0123037109320072	mutated ERG and p65 motif
chr16:9937980_T_C	chr16	9937880	9938080	+	-0.17862100000000006	4.2779063661516e-05	mutated ERG and p65 motif
chr19:8373919_ACACAG_A	chr19	8373819	8374019	+	0.16158000000000006	0.0032326463619327607	mutated ERG and p65 motif
chr1:154589682_C_G	chr1	154589582	154589782	+	-0.139347	0.00674388996629182	mutated ERG and p65 motif
chr1:196149591_C_T	chr1	196149491	196149691	+	-0.18569	0.00129649439628649	mutated ERG and p65 motif
chr1:200007432_A_G	chr1	200007332	200007532	+	0.16425100000000006	0.000414516468310915	mutated ERG and p65 motif
chr1:210001713_C_A	chr1	210001613	210001813	+	0.08173699999999995	1.4947826020410098e-05	mutated ERG and p65 motif
chr1:3721004_T_C	chr1	3720904	3721104	+	-0.20761100000000002	0.00022735396123004902	mutated ERG and p65 motif
chr1:85779393_G_A	chr1	85779293	85779493	+	-0.030097000000000037	0.0167698304913392	mutated ERG and p65 motif
chr21:20145459_T_C	chr21	20145359	20145559	+	0.31087800000000004	5.62722716240017e-07	mutated ERG and p65 motif
chr21:40467643_T_C	chr21	40467543	40467743	+	0.20156400000000008	0.0011476441329474304	mutated ERG and p65 motif
chr22:39566468_T_C	chr22	39566368	39566568	+	0.14922999999999995	0.0055278938938133106	mutated ERG and p65 motif
chr2:127867107_T_C	chr2	127867007	127867207	+	0.25402600000000003	0.00232294617565935	mutated ERG and p65 motif
chr2:1712139_G_A	chr2	1712039	1712239	+	0.14614700000000005	0.0208301674654614	mutated ERG and p65 motif
chr2:202560998_C_T	chr2	202560898	202561098	+	-0.057589999999999975	0.022218959902043	mutated ERG and p65 motif
chr3:125709050_G_T	chr3	125708950	125709150	+	-0.17685599999999999	0.0226582234139897	mutated ERG and p65 motif
chr3:147031426_ATAATGGAAACTAC_A	chr3	147031326	147031526	+	0.21428400000000006	0.000766918364786422	mutated ERG and p65 motif
chr3:95987563_A_T	chr3	95987463	95987663	+	-0.15104299999999998	0.0216382718947573	mutated ERG and p65 motif
chr4:147878581_C_G	chr4	147878481	147878681	+	-0.221189	0.00391474720039255	mutated ERG and p65 motif
chr4:3307638_C_G	chr4	3307538	3307738	+	-0.130044	0.0231121854293433	mutated ERG and p65 motif
chr6:105879268_T_C	chr6	105879168	105879368	+	0.105005	0.0314710434742227	mutated ERG and p65 motif
chr6:3806456_A_G	chr6	3806356	3806556	+	0.06636999999999993	0.0169556684221189	mutated ERG and p65 motif
chr7:110214134_T_C	chr7	110214034	110214234	+	0.21659399999999995	0.0326119489111128	mutated ERG and p65 motif
chr8:13228783_C_T	chr8	13228683	13228883	+	-0.09170300000000003	9.22281719300797e-09	mutated ERG and p65 motif
chr8:32425591_C_T	chr8	32425491	32425691	+	-0.154291	0.0028614364312153	mutated ERG and p65 motif
chr8:39799765_C_T	chr8	39799665	39799865	+	0.12091700000000005	0.0152826151797337	mutated ERG and p65 motif
chr8:40246554_A_G	chr8	40246454	40246654	+	0.203673	0.0214657250859563	mutated ERG and p65 motif
chr9:112832200_C_T	chr9	112832100	112832300	+	-0.09899000000000002	0.00348217832338452	mutated ERG and p65 motif
chr9:18979051_A_G	chr9	18978951	18979151	+	0.15706300000000006	0.0020837556106294	mutated ERG and p65 motif
chr9:73049257_A_G	chr9	73049157	73049357	+	0.09948100000000004	0.00383968116391936	mutated ERG and p65 motif
chr10:101743304_G_T	chr10	101743204	101743404	+	0.07521099999999993	0.0340158758364736	mutated p65 motif
chr10:104391627_A_G	chr10	104391527	104391727	+	0.15686299999999995	2.0452355661698803e-07	mutated p65 motif
chr10:104393506_A_G	chr10	104393406	104393606	+	0.135243	1.43271330065587e-05	mutated p65 motif
chr10:105274625_TCTCTGGACAGCCCC_T	chr10	105274525	105274725	+	-0.13356300000000002	0.0494005729933154	mutated p65 motif
chr10:105814459_A_C	chr10	105814359	105814559	+	0.09470600000000008	4.2603078846121396e-05	mutated p65 motif
chr10:120958293_G_A	chr10	120958193	120958393	+	-0.207096	3.142254319436081e-09	mutated p65 motif
chr10:122186352_C_A	chr10	122186252	122186452	+	0.1494270000000001	0.0299272442135301	mutated p65 motif
chr10:126850489_A_G	chr10	126850389	126850589	+	0.08758999999999995	0.0235823468556122	mutated p65 motif
chr10:17250230_C_G	chr10	17250130	17250330	+	0.09801099999999996	0.0194983268642031	mutated p65 motif
chr10:17250261_C_G	chr10	17250161	17250361	+	-0.14641400000000002	0.00154425910524487	mutated p65 motif
chr10:24783393_C_A	chr10	24783293	24783493	+	0.14465299999999992	0.0396023295021868	mutated p65 motif
chr10:27672220_A_C	chr10	27672120	27672320	+	-0.194781	0.000229330750494811	mutated p65 motif
chr10:27672902_TA_T	chr10	27672802	27673002	+	-0.194745	0.000229330750494811	mutated p65 motif
chr10:29844275_G_A	chr10	29844175	29844375	+	0.14675300000000002	0.00219141296133743	mutated p65 motif
chr10:29846215_CG_C	chr10	29846115	29846315	+	0.14731300000000006	0.00219141296133743	mutated p65 motif
chr10:3091635_G_A	chr10	3091535	3091735	+	0.15062799999999998	0.000481479128763599	mutated p65 motif
chr10:31107858_C_T	chr10	31107758	31107958	+	-0.05415699999999996	3.06359848086524e-05	mutated p65 motif
chr10:35019863_T_C	chr10	35019763	35019963	+	0.15633299999999994	0.00010049734582096801	mutated p65 motif
chr10:35020982_G_A	chr10	35020882	35021082	+	0.17176199999999994	2.60603125052334e-05	mutated p65 motif
chr10:35021701_C_T	chr10	35021601	35021801	+	-0.094555	0.0263105313380709	mutated p65 motif
chr10:3919071_G_A	chr10	3918971	3919171	+	0.131675	0.00252072818275685	mutated p65 motif
chr10:3965517_G_A	chr10	3965417	3965617	+	-0.07368199999999997	0.00205422535476775	mutated p65 motif
chr10:3966574_G_T	chr10	3966474	3966674	+	-0.09682399999999997	0.000289916640832205	mutated p65 motif
chr10:3968292_A_G	chr10	3968192	3968392	+	-0.09689299999999999	0.000289916640832205	mutated p65 motif
chr10:4847772_A_G	chr10	4847672	4847872	+	0.03007899999999997	0.0493034738496023	mutated p65 motif
chr10:4909030_G_A	chr10	4908930	4909130	+	0.0696	0.0376712003912891	mutated p65 motif
chr10:4910989_G_A	chr10	4910889	4911089	+	0.07136100000000001	0.0376712003912891	mutated p65 motif
chr10:52364839_C_T	chr10	52364739	52364939	+	-0.13834800000000005	0.00535932608825384	mutated p65 motif
chr10:59784226_G_A	chr10	59784126	59784326	+	0.09038999999999996	0.0024639047539965	mutated p65 motif
chr10:59784235_C_T	chr10	59784135	59784335	+	-0.11708900000000001	0.0024639047539965	mutated p65 motif
chr10:60276906_C_T	chr10	60276806	60277006	+	-0.09926	0.0378725844960145	mutated p65 motif
chr10:61296617_C_G	chr10	61296517	61296717	+	0.16636099999999998	0.00886859179336685	mutated p65 motif
chr10:63590436_C_T	chr10	63590336	63590536	+	0.180551	0.000406208836934808	mutated p65 motif
chr10:71575904_G_A	chr10	71575804	71576004	+	0.11004399999999992	6.05847400347802e-05	mutated p65 motif
chr10:75653205_G_T	chr10	75653105	75653305	+	0.11991900000000001	0.00274971097765012	mutated p65 motif
chr10:75657423_T_G	chr10	75657323	75657523	+	0.07769300000000001	0.015114049101828004	mutated p65 motif
chr10:75911984_T_C	chr10	75911884	75912084	+	0.10008300000000003	0.0390832545657303	mutated p65 motif
chr10:77864564_C_G	chr10	77864464	77864664	+	0.14101400000000008	0.035267843666007985	mutated p65 motif
chr10:90039357_A_AAGGAAATGAATCTC	chr10	90039257	90039457	+	0.239553	0.0036514388114457295	mutated p65 motif
chr10:91349049_G_T	chr10	91348949	91349149	+	0.23762199999999997	0.0067610312487103395	mutated p65 motif
chr10:93363445_G_A	chr10	93363345	93363545	+	-0.09792800000000003	0.00111214625817718	mutated p65 motif
chr10:93364279_C_A	chr10	93364179	93364379	+	0.14668900000000007	2.10239908031711e-07	mutated p65 motif
chr10:95173966_A_G	chr10	95173866	95174066	+	0.07931899999999993	0.0115319903288223	mutated p65 motif
chr10:95238178_C_T	chr10	95238078	95238278	+	-0.02585299999999996	0.0015790267799118199	mutated p65 motif
chr11:103463224_C_T	chr11	103463124	103463324	+	0.2287640000000001	1.4396947458431e-11	mutated p65 motif
chr11:103508911_A_G	chr11	103508811	103509011	+	0.069859	2.6350269696506895e-08	mutated p65 motif
chr11:103530438_C_T	chr11	103530338	103530538	+	-0.13781400000000002	0.010813881599424	mutated p65 motif
chr11:103673277_A_C	chr11	103673177	103673377	+	-0.222644	2.43103468655589e-05	mutated p65 motif
chr11:108742650_T_C	chr11	108742550	108742750	+	0.32921	7.775232894839348e-23	mutated p65 motif
chr11:110020882_G_T	chr11	110020782	110020982	+	-0.050200000000000015	0.0348659482565336	mutated p65 motif
chr11:12190617_A_G	chr11	12190517	12190717	+	-0.03223599999999999	0.00617033913016519	mutated p65 motif
chr11:12246879_A_T	chr11	12246779	12246979	+	0.09865500000000003	4.4823987577567203e-07	mutated p65 motif
chr11:12261847_G_C	chr11	12261747	12261947	+	-0.11643200000000005	0.000386614645604506	mutated p65 motif
chr11:12306459_A_C	chr11	12306359	12306559	+	0.052370000000000035	0.0152988218240876	mutated p65 motif
chr11:130765723_C_G	chr11	130765623	130765823	+	-0.11844600000000001	0.0420960960145582	mutated p65 motif
chr11:19977729_A_G	chr11	19977629	19977829	+	-0.15159499999999998	4.60489597294707e-06	mutated p65 motif
chr11:23495582_A_G	chr11	23495482	23495682	+	-0.12133100000000002	0.00119313374696718	mutated p65 motif
chr11:23592851_A_T	chr11	23592751	23592951	+	-0.300716	7.567276317001912e-16	mutated p65 motif
chr11:29503442_T_G	chr11	29503342	29503542	+	-0.144208	0.000263622754920947	mutated p65 motif
chr11:42336946_T_C	chr11	42336846	42337046	+	-0.13505599999999998	0.000443634192784316	mutated p65 motif
chr11:5389102_T_A	chr11	5389002	5389202	+	-0.189397	0.0049348774953142	mutated p65 motif
chr11:7621867_G_T	chr11	7621767	7621967	+	-0.091806	0.00910507885129448	mutated p65 motif
chr11:7624109_G_C	chr11	7624009	7624209	+	0.09654200000000003	0.00227613813748727	mutated p65 motif
chr11:7625531_G_C	chr11	7625431	7625631	+	0.08902399999999999	0.00502746817041465	mutated p65 motif
chr11:835065_C_T	chr11	834965	835165	+	-0.14075	1.7013452217308996e-06	mutated p65 motif
chr11:838542_C_T	chr11	838442	838642	+	-0.207256	2.72854711855562e-12	mutated p65 motif
chr11:840604_C_G	chr11	840504	840704	+	-0.226957	2.2899346112440296e-12	mutated p65 motif
chr11:843097_G_C	chr11	842997	843197	+	-0.09459800000000003	0.0006111088376702152	mutated p65 motif
chr11:86230474_C_G	chr11	86230374	86230574	+	0.08101400000000003	0.00893961949035162	mutated p65 motif
chr11:86231119_T_C	chr11	86231019	86231219	+	0.07751300000000005	0.0142579350823512	mutated p65 motif
chr11:97836453_C_T	chr11	97836353	97836553	+	0.10950000000000004	0.0124054301174296	mutated p65 motif
chr12:104680368_T_C	chr12	104680268	104680468	+	0.07001000000000003	0.0400425185186641	mutated p65 motif
chr12:104683024_A_G	chr12	104682924	104683124	+	0.08072400000000003	0.033728011385468	mutated p65 motif
chr12:106532072_C_A	chr12	106531972	106532172	+	0.15768700000000002	0.000480107524592663	mutated p65 motif
chr12:117576655_C_A	chr12	117576555	117576755	+	-0.189966	0.00125484111337379	mutated p65 motif
chr12:125006162_A_G	chr12	125006062	125006262	+	0.09545500000000008	0.0490329513703645	mutated p65 motif
chr12:129280712_G_A	chr12	129280612	129280812	+	-0.16655899999999998	4.38498955784423e-06	mutated p65 motif
chr12:12956710_C_T	chr12	12956610	12956810	+	0.117645	0.0008060792215321	mutated p65 motif
chr12:12962083_G_A	chr12	12961983	12962183	+	-0.116025	0.0008060792215321	mutated p65 motif
chr12:13026054_G_A	chr12	13025954	13026154	+	0.16005900000000006	0.0493770143535707	mutated p65 motif
chr12:13046018_T_A	chr12	13045918	13046118	+	0.09091099999999996	0.015501223069457	mutated p65 motif
chr12:15105560_A_T	chr12	15105460	15105660	+	0.056585	0.00208333461786722	mutated p65 motif
chr12:24762161_G_C	chr12	24762061	24762261	+	0.10507299999999996	0.0336265018033043	mutated p65 motif
chr12:24762452_G_A	chr12	24762352	24762552	+	0.10473599999999994	0.0336265018033043	mutated p65 motif
chr12:26428063_A_G	chr12	26427963	26428163	+	0.14486199999999996	0.0177610699583344	mutated p65 motif
chr12:26799481_G_A	chr12	26799381	26799581	+	-0.12731900000000002	0.00912662719276972	mutated p65 motif
chr12:31884714_A_AT	chr12	31884614	31884814	+	0.059494999999999965	0.0450139091831349	mutated p65 motif
chr12:31884717_C_T	chr12	31884617	31884817	+	-0.05828699999999998	0.0450139091831349	mutated p65 motif
chr12:3325469_T_A	chr12	3325369	3325569	+	-0.12415900000000002	0.00645006215254556	mutated p65 motif
chr12:3325815_G_T	chr12	3325715	3325915	+	-0.128058	0.00645006215254556	mutated p65 motif
chr12:461598_C_A	chr12	461498	461698	+	-0.202284	0.00354076923821173	mutated p65 motif
chr12:46382256_C_A	chr12	46382156	46382356	+	0.172782	0.00011464361204431999	mutated p65 motif
chr12:48195873_C_T	chr12	48195773	48195973	+	0.16602899999999998	6.70928421486058e-08	mutated p65 motif
chr12:52583604_G_T	chr12	52583504	52583704	+	-0.06451999999999998	0.00261700132966847	mutated p65 motif
chr12:53615513_C_G	chr12	53615413	53615613	+	0.11133500000000007	0.0497906196552769	mutated p65 motif
chr12:65017086_G_A	chr12	65016986	65017186	+	0.09449399999999997	0.00193005113762698	mutated p65 motif
chr12:70637343_G_T	chr12	70637243	70637443	+	0.145957	0.0415692379725675	mutated p65 motif
chr12:70993550_T_C	chr12	70993450	70993650	+	0.135347	7.94426444826042e-10	mutated p65 motif
chr12:86091425_A_T	chr12	86091325	86091525	+	-0.23933600000000002	0.00232045099820645	mutated p65 motif
chr12:90693265_G_C	chr12	90693165	90693365	+	-0.174896	0.0135448759086656	mutated p65 motif
chr12:94983835_T_TCTGGTGTGGCTTC	chr12	94983735	94983935	+	-0.15516300000000002	1.8551080056188005e-09	mutated p65 motif
chr12:94984929_C_G	chr12	94984829	94985029	+	-0.16835	3.13769860042839e-10	mutated p65 motif
chr12:96868799_G_A	chr12	96868699	96868899	+	-0.260888	6.53552937946908e-17	mutated p65 motif
chr12:98793961_G_A	chr12	98793861	98794061	+	-0.06850400000000001	0.0205635055026994	mutated p65 motif
chr13:110892022_G_A	chr13	110891922	110892122	+	0.21328699999999998	7.5407841157689e-05	mutated p65 motif
chr13:110892103_A_G	chr13	110892003	110892203	+	0.213329	7.5407841157689e-05	mutated p65 motif
chr13:25078555_G_A	chr13	25078455	25078655	+	0.19516999999999995	0.00021948150690939298	mutated p65 motif
chr13:34856572_C_T	chr13	34856472	34856672	+	-0.09031099999999996	0.00299450537665737	mutated p65 motif
chr13:64547109_A_G	chr13	64547009	64547209	+	0.051693999999999914	0.0296870892417731	mutated p65 motif
chr13:64813701_C_G	chr13	64813601	64813801	+	-0.10009	0.0120699568527571	mutated p65 motif
chr13:79184859_A_G	chr13	79184759	79184959	+	-0.119247	0.00465999749142309	mutated p65 motif
chr13:99739742_T_G	chr13	99739642	99739842	+	0.161551	0.00047439983379275	mutated p65 motif
chr14:104162376_C_T	chr14	104162276	104162476	+	-0.143341	0.0468425355004977	mutated p65 motif
chr14:22137771_C_T	chr14	22137671	22137871	+	0.301144	2.98726083899109e-05	mutated p65 motif
chr14:22988972_G_C	chr14	22988872	22989072	+	0.15101300000000006	0.0160037711445886	mutated p65 motif
chr14:34082824_C_A	chr14	34082724	34082924	+	-0.177008	0.00301824491829699	mutated p65 motif
chr14:34237791_G_A	chr14	34237691	34237891	+	0.13768500000000006	0.0366397321791864	mutated p65 motif
chr14:52493068_G_A	chr14	52492968	52493168	+	0.06307799999999998	0.0427808960036384	mutated p65 motif
chr14:56257851_G_A	chr14	56257751	56257951	+	-0.08787	0.0198133618409714	mutated p65 motif
chr14:58199937_C_T	chr14	58199837	58200037	+	-0.07776700000000003	0.00110579702094474	mutated p65 motif
chr14:65710399_G_A	chr14	65710299	65710499	+	-0.09304800000000002	6.97852287634713e-09	mutated p65 motif
chr14:65713437_A_G	chr14	65713337	65713537	+	0.06430800000000003	2.33963244317335e-06	mutated p65 motif
chr14:74208910_A_G	chr14	74208810	74209010	+	0.05905899999999997	0.0485142540385603	mutated p65 motif
chr14:74530030_T_C	chr14	74529930	74530130	+	0.11380500000000005	0.0356997216466959	mutated p65 motif
chr14:90603371_AATT_A	chr14	90603271	90603471	+	0.18800299999999992	4.12108608065328e-12	mutated p65 motif
chr14:95503828_C_T	chr14	95503728	95503928	+	0.22757199999999997	7.65117616640167e-05	mutated p65 motif
chr14:95715157_G_T	chr14	95715057	95715257	+	-0.236056	4.4344089640394e-08	mutated p65 motif
chr14:95728542_A_T	chr14	95728442	95728642	+	-0.220835	1.07922361880246e-05	mutated p65 motif
chr15:100007152_G_T	chr15	100007052	100007252	+	0.18935200000000008	3.75321046508795e-05	mutated p65 motif
chr15:100007155_T_C	chr15	100007055	100007255	+	0.14701600000000006	0.003754186688037271	mutated p65 motif
chr15:22924706_C_T	chr15	22924606	22924806	+	0.12072099999999995	0.0422177620528311	mutated p65 motif
chr15:25104146_C_G	chr15	25104046	25104246	+	-0.20761	0.0106530618310144	mutated p65 motif
chr15:25104943_G_C	chr15	25104843	25105043	+	-0.31270200000000004	0.00591511941729844	mutated p65 motif
chr15:31750344_A_G	chr15	31750244	31750444	+	0.17801	0.0198053542294049	mutated p65 motif
chr15:42225008_C_T	chr15	42224908	42225108	+	0.055842000000000065	0.0005734247909140152	mutated p65 motif
chr15:46130142_C_G	chr15	46130042	46130242	+	-0.154339	0.0218166516380923	mutated p65 motif
chr15:57672835_A_T	chr15	57672735	57672935	+	-0.10641699999999997	4.03719255036998e-14	mutated p65 motif
chr15:57688660_A_G	chr15	57688560	57688760	+	0.041933	0.00439470359409363	mutated p65 motif
chr15:57794557_G_A	chr15	57794457	57794657	+	0.03588199999999997	0.0365614787410177	mutated p65 motif
chr15:57904337_A_C	chr15	57904237	57904437	+	-0.14357399999999998	0.00276946831038102	mutated p65 motif
chr15:62762595_G_A	chr15	62762495	62762695	+	0.24050400000000005	0.00287975356509505	mutated p65 motif
chr15:67010990_T_A	chr15	67010890	67011090	+	-0.06757600000000002	0.00260172420135656	mutated p65 motif
chr15:67241209_C_T	chr15	67241109	67241309	+	0.15057299999999996	0.0011937040094767801	mutated p65 motif
chr15:71080066_T_C	chr15	71079966	71080166	+	0.25675800000000004	2.99881255417157e-06	mutated p65 motif
chr15:71081590_C_T	chr15	71081490	71081690	+	0.256713	2.99881255417157e-06	mutated p65 motif
chr15:95127947_T_C	chr15	95127847	95128047	+	-0.113219	0.0021918099372059607	mutated p65 motif
chr15:95843799_A_C	chr15	95843699	95843899	+	-0.09018500000000003	0.0012864867949939401	mutated p65 motif
chr16:16077498_G_C	chr16	16077398	16077598	+	0.038210000000000084	0.0253119606346448	mutated p65 motif
chr16:16077602_G_C	chr16	16077502	16077702	+	0.07757799999999992	0.000286061337115944	mutated p65 motif
chr16:16124369_A_G	chr16	16124269	16124469	+	-0.108732	6.206548777841221e-05	mutated p65 motif
chr16:29302751_A_T	chr16	29302651	29302851	+	0.114375	0.0211485634662846	mutated p65 motif
chr16:29302798_T_G	chr16	29302698	29302898	+	0.13733400000000007	0.00511456877275936	mutated p65 motif
chr16:50739582_C_G	chr16	50739482	50739682	+	0.17535799999999999	0.0040211909511961895	mutated p65 motif
chr16:77340831_G_C	chr16	77340731	77340931	+	-0.09579899999999997	0.00037631878129195295	mutated p65 motif
chr16:77344049_T_C	chr16	77343949	77344149	+	0.06851400000000007	0.000656811899316318	mutated p65 motif
chr16:77345598_T_G	chr16	77345498	77345698	+	-0.10275100000000004	0.000292752919904704	mutated p65 motif
chr16:77345602_C_T	chr16	77345502	77345702	+	-0.102497	0.00019955629456425101	mutated p65 motif
chr16:81716160_G_A	chr16	81716060	81716260	+	0.07938800000000001	3.871047900238661e-05	mutated p65 motif
chr16:83988314_G_A	chr16	83988214	83988414	+	0.10418800000000006	0.0108542340939277	mutated p65 motif
chr16:84540668_G_A	chr16	84540568	84540768	+	-0.194824	0.000754847157010986	mutated p65 motif
chr16:89161365_G_A	chr16	89161265	89161465	+	0.11863100000000006	0.0133233719160058	mutated p65 motif
chr16:9141857_C_A	chr16	9141757	9141957	+	0.11229200000000006	0.0481446596182901	mutated p65 motif
chr16:9142859_CCT_C	chr16	9142759	9142959	+	0.13583500000000004	0.0481446596182901	mutated p65 motif
chr17:16813804_G_C	chr17	16813704	16813904	+	0.154594	0.0271543282446831	mutated p65 motif
chr17:17183255_C_A	chr17	17183155	17183355	+	0.09400600000000003	0.0352421809716459	mutated p65 motif
chr17:2296681_A_G	chr17	2296581	2296781	+	0.09494199999999996	0.0240606833543063	mutated p65 motif
chr17:32739642_T_C	chr17	32739542	32739742	+	-0.218146	9.41540407723455e-14	mutated p65 motif
chr17:39256137_C_A	chr17	39256037	39256237	+	0.14374399999999998	0.0487724656690816	mutated p65 motif
chr17:43510650_A_G	chr17	43510550	43510750	+	0.104692	0.0479523956353284	mutated p65 motif
chr17:44026548_T_C	chr17	44026448	44026648	+	-0.231112	5.654197166201861e-05	mutated p65 motif
chr17:45332890_G_C	chr17	45332790	45332990	+	0.122321	0.00888895541127923	mutated p65 motif
chr17:5729774_C_G	chr17	5729674	5729874	+	0.13268400000000002	7.51111359635909e-07	mutated p65 motif
chr17:6137632_G_A	chr17	6137532	6137732	+	-0.226352	0.0019035986305713894	mutated p65 motif
chr17:6159834_G_A	chr17	6159734	6159934	+	0.08609899999999993	0.00274783478885835	mutated p65 motif
chr17:64270436_G_A	chr17	64270336	64270536	+	0.11092999999999996	0.00220702256250936	mutated p65 motif
chr17:71228937_C_T	chr17	71228837	71229037	+	0.12034200000000005	0.00207401466793575	mutated p65 motif
chr17:74557072_G_GAA	chr17	74556972	74557172	+	-0.106047	0.0381050718536325	mutated p65 motif
chr17:76219141_C_T	chr17	76219041	76219241	+	-0.074154	0.0402202827891824	mutated p65 motif
chr17:77908321_G_A	chr17	77908221	77908421	+	0.132197	0.0177499591254378	mutated p65 motif
chr17:78763580_G_A	chr17	78763480	78763680	+	-0.14693699999999998	0.0422178271544113	mutated p65 motif
chr17:79455936_TTCACCCCTGTGCGGTAACG_T	chr17	79455836	79456036	+	-0.141565	0.00211285731224479	mutated p65 motif
chr17:79479469_A_C	chr17	79479369	79479569	+	0.10368599999999993	0.00173661294419388	mutated p65 motif
chr18:2515924_C_T	chr18	2515824	2516024	+	0.09959300000000004	0.000249564404338481	mutated p65 motif
chr18:5456774_A_G	chr18	5456674	5456874	+	-0.14101599999999995	6.12650869052664e-05	mutated p65 motif
chr18:55338192_T_G	chr18	55338092	55338292	+	-0.111419	0.000596105757373551	mutated p65 motif
chr18:55347756_C_T	chr18	55347656	55347856	+	-0.11089699999999997	0.000596105757373551	mutated p65 motif
chr18:57181281_C_T	chr18	57181181	57181381	+	0.258204	1.02571941240802e-20	mutated p65 motif
chr18:57550546_T_C	chr18	57550446	57550646	+	0.051429999999999976	0.0209832433874569	mutated p65 motif
chr18:813554_G_A	chr18	813454	813654	+	0.07391400000000004	0.0376290231348373	mutated p65 motif
chr18:8450115_A_C	chr18	8450015	8450215	+	0.15773900000000007	0.0264011044865871	mutated p65 motif
chr19:1018673_A_G	chr19	1018573	1018773	+	0.14816300000000004	0.00698495696294369	mutated p65 motif
chr19:15236943_A_G	chr19	15236843	15237043	+	0.08775100000000002	0.039068910645112	mutated p65 motif
chr19:16183418_C_A	chr19	16183318	16183518	+	0.12514399999999992	1.48469598914212e-06	mutated p65 motif
chr19:28915760_G_A	chr19	28915660	28915860	+	0.32635000000000003	6.7229006226845594e-12	mutated p65 motif
chr19:28915761_G_C	chr19	28915661	28915861	+	0.3263520000000001	6.7229006226845594e-12	mutated p65 motif
chr19:28916579_T_G	chr19	28916479	28916679	+	0.3264299999999999	6.7229006226845594e-12	mutated p65 motif
chr19:36659546_C_A	chr19	36659446	36659646	+	-0.12545	0.0227349559145677	mutated p65 motif
chr19:43708752_G_A	chr19	43708652	43708852	+	-0.26222100000000004	0.000815253747281621	mutated p65 motif
chr19:46790996_C_T	chr19	46790896	46791096	+	0.123077	0.00912887631576072	mutated p65 motif
chr19:52074761_A_G	chr19	52074661	52074861	+	-0.056765999999999976	0.00441445163881521	mutated p65 motif
chr19:54708077_T_C	chr19	54707977	54708177	+	0.06463599999999993	0.005723741842790679	mutated p65 motif
chr19:54961174_A_G	chr19	54961074	54961274	+	-0.08833400000000002	0.0366998537686574	mutated p65 motif
chr19:783742_C_G	chr19	783642	783842	+	0.12023700000000005	0.0376765454041269	mutated p65 motif
chr19:8374866_T_A	chr19	8374766	8374966	+	0.14600500000000005	0.00702207474321581	mutated p65 motif
chr1:153584986_A_C	chr1	153584886	153585086	+	0.10391400000000006	0.00606232913335326	mutated p65 motif
chr1:159463205_TTCCCTAAAATG_T	chr1	159463105	159463305	+	-0.13425199999999998	0.0377754862647066	mutated p65 motif
chr1:162848254_G_A	chr1	162848154	162848354	+	0.133421	0.00899020876986653	mutated p65 motif
chr1:168147392_C_T	chr1	168147292	168147492	+	-0.112883	0.047456577946018	mutated p65 motif
chr1:172863647_T_C	chr1	172863547	172863747	+	0.04996899999999993	0.0015881729486133	mutated p65 motif
chr1:175161599_G_T	chr1	175161499	175161699	+	0.049235999999999946	0.0405255617884428	mutated p65 motif
chr1:183155715_CT_C	chr1	183155615	183155815	+	0.16257299999999994	0.0124893321272804	mutated p65 motif
chr1:183810559_C_G	chr1	183810459	183810659	+	-0.07571000000000007	0.0217203168534355	mutated p65 motif
chr1:184228871_T_C	chr1	184228771	184228971	+	-0.22165100000000004	4.335484135676871e-14	mutated p65 motif
chr1:184923061_C_G	chr1	184922961	184923161	+	-0.130222	0.0217849138687315	mutated p65 motif
chr1:201745169_A_G	chr1	201745069	201745269	+	0.12389799999999995	0.0070685948181342904	mutated p65 motif
chr1:205237137_T_C	chr1	205237037	205237237	+	0.16779100000000002	0.00949385532053388	mutated p65 motif
chr1:210001048_A_C	chr1	210000948	210001148	+	0.081735	1.4947826020410098e-05	mutated p65 motif
chr1:214289118_G_A	chr1	214289018	214289218	+	0.131865	0.0112052649333829	mutated p65 motif
chr1:21652177_C_T	chr1	21652077	21652277	+	0.088646	0.0064386857307773	mutated p65 motif
chr1:22258599_G_C	chr1	22258499	22258699	+	-0.09240700000000003	1.06801546407166e-05	mutated p65 motif
chr1:223914453_C_T	chr1	223914353	223914553	+	-0.094625	7.80562487867222e-07	mutated p65 motif
chr1:244488432_G_C	chr1	244488332	244488532	+	0.12295299999999998	5.79962745488286e-06	mutated p65 motif
chr1:39492764_G_A	chr1	39492664	39492864	+	-0.10882600000000003	0.00475210992811245	mutated p65 motif
chr1:39492765_A_T	chr1	39492665	39492865	+	-0.108825	0.00475210992811245	mutated p65 motif
chr1:59277926_C_T	chr1	59277826	59278026	+	0.05458300000000005	0.0179041298984955	mutated p65 motif
chr1:66954924_C_A	chr1	66954824	66955024	+	-0.179161	0.000232570284960035	mutated p65 motif
chr1:66957459_T_A	chr1	66957359	66957559	+	0.10144600000000004	0.0169296894073156	mutated p65 motif
chr1:68089993_G_A	chr1	68089893	68090093	+	-0.09216399999999997	0.0470973374404829	mutated p65 motif
chr1:68155010_T_G	chr1	68154910	68155110	+	0.08944700000000005	0.0052623099482624214	mutated p65 motif
chr1:80305206_C_A	chr1	80305106	80305306	+	0.08758599999999994	0.0278739333849527	mutated p65 motif
chr20:1148576_G_A	chr20	1148476	1148676	+	0.18083000000000005	0.0350414134182224	mutated p65 motif
chr20:12907179_C_A	chr20	12907079	12907279	+	0.11482199999999998	0.0270728691490875	mutated p65 motif
chr20:1397780_G_A	chr20	1397680	1397880	+	-0.12075899999999999	6.15718439199275e-06	mutated p65 motif
chr20:1417397_C_T	chr20	1417297	1417497	+	-0.15405000000000002	0.011708077906444	mutated p65 motif
chr20:15142828_A_G	chr20	15142728	15142928	+	0.170972	0.00360370408864553	mutated p65 motif
chr20:17947317_A_G	chr20	17947217	17947417	+	0.08230899999999998	0.0106911201794188	mutated p65 motif
chr20:17948894_G_A	chr20	17948794	17948994	+	0.06632700000000002	0.02713050583843	mutated p65 motif
chr20:2199055_G_GACACACACTTCTAAA	chr20	2198955	2199155	+	0.283855	2.01166669300577e-06	mutated p65 motif
chr20:32448736_C_A	chr20	32448636	32448836	+	0.10043500000000004	0.0297735923047542	mutated p65 motif
chr20:4062886_T_C	chr20	4062786	4062986	+	-0.11815599999999997	0.0128013100943397	mutated p65 motif
chr20:48199956_G_A	chr20	48199856	48200056	+	0.17256000000000005	3.92694633215793e-09	mutated p65 motif
chr20:48206586_G_A	chr20	48206486	48206686	+	0.16669899999999993	3.3780920279554e-08	mutated p65 motif
chr20:48429706_A_C	chr20	48429606	48429806	+	-0.05336499999999994	0.008869283252539209	mutated p65 motif
chr20:56325452_A_G	chr20	56325352	56325552	+	-0.20757600000000004	4.3256215071385296e-05	mutated p65 motif
chr20:6657554_T_C	chr20	6657454	6657654	+	0.05015999999999998	0.0248107893797745	mutated p65 motif
chr20:6690400_T_TG	chr20	6690300	6690500	+	0.100534	0.00216520737255976	mutated p65 motif
chr20:6693128_C_T	chr20	6693028	6693228	+	0.11589899999999995	0.000546328570707486	mutated p65 motif
chr20:7476840_C_G	chr20	7476740	7476940	+	-0.12099499999999995	0.0163887114258963	mutated p65 motif
chr21:20144540_G_C	chr21	20144440	20144640	+	0.2974020000000001	6.58906044829257e-07	mutated p65 motif
chr21:25417796_G_T	chr21	25417696	25417896	+	-0.14713299999999999	0.0128800583382934	mutated p65 motif
chr21:34775434_A_C	chr21	34775334	34775534	+	0.13195	0.0102066471757094	mutated p65 motif
chr21:38012090_A_G	chr21	38011990	38012190	+	0.08226899999999993	0.0415745064199858	mutated p65 motif
chr21:38349851_A_G	chr21	38349751	38349951	+	0.123857	0.0329768066728214	mutated p65 motif
chr21:39722638_C_T	chr21	39722538	39722738	+	0.13817900000000005	0.00809996732028836	mutated p65 motif
chr21:40343087_T_C	chr21	40342987	40343187	+	0.12466699999999994	0.0410563366785812	mutated p65 motif
chr22:23619461_C_T	chr22	23619361	23619561	+	0.22171300000000005	3.35755491137967e-06	mutated p65 motif
chr22:23622972_T_C	chr22	23622872	23623072	+	0.19656800000000008	2.06003037188205e-05	mutated p65 motif
chr22:27901554_G_C	chr22	27901454	27901654	+	0.09402299999999997	7.380766231779671e-06	mutated p65 motif
chr22:27905428_T_C	chr22	27905328	27905528	+	0.07781800000000005	0.0021966456372009197	mutated p65 motif
chr22:37581485_C_A	chr22	37581385	37581585	+	-0.08803	0.0038602226443106603	mutated p65 motif
chr22:37586961_T_A	chr22	37586861	37587061	+	-0.07079300000000005	0.0127831906209454	mutated p65 motif
chr22:38572057_C_T	chr22	38571957	38572157	+	-0.11164200000000002	2.33626024518776e-05	mutated p65 motif
chr22:39566728_G_A	chr22	39566628	39566828	+	0.139567	0.0055278938938133106	mutated p65 motif
chr22:39568585_G_T	chr22	39568485	39568685	+	0.12817500000000004	0.0055278938938133106	mutated p65 motif
chr22:43077573_A_C	chr22	43077473	43077673	+	-0.176307	0.00013295109267953998	mutated p65 motif
chr2:105654716_C_T	chr2	105654616	105654816	+	0.14811200000000002	0.00103454232990967	mutated p65 motif
chr2:137647381_C_T	chr2	137647281	137647481	+	0.148231	0.007679643796536991	mutated p65 motif
chr2:160896471_G_T	chr2	160896371	160896571	+	0.11270100000000005	0.00113478512437678	mutated p65 motif
chr2:165419347_T_C	chr2	165419247	165419447	+	-0.09001899999999996	0.00653832183509644	mutated p65 motif
chr2:165426386_C_G	chr2	165426286	165426486	+	0.055019999999999965	0.0267493399740109	mutated p65 motif
chr2:192250342_A_T	chr2	192250242	192250442	+	0.158736	0.0188332228344123	mutated p65 motif
chr2:218122743_T_C	chr2	218122643	218122843	+	-0.12505700000000006	0.0278477780235202	mutated p65 motif
chr2:224588944_A_C	chr2	224588844	224589044	+	-0.097304	0.0270690065390691	mutated p65 motif
chr2:224685361_T_C	chr2	224685261	224685461	+	-0.272135	1.6054828857445998e-11	mutated p65 motif
chr2:228731484_GGGTTTTTCC_G	chr2	228731384	228731584	+	-0.07714099999999996	0.000132557775799252	mutated p65 motif
chr2:228740927_G_A	chr2	228740827	228741027	+	-0.07158199999999998	0.000283310976501444	mutated p65 motif
chr2:235885392_G_GAAAAACATAAGAC	chr2	235885292	235885492	+	0.12158900000000004	0.00258762840531966	mutated p65 motif
chr2:237855744_T_A	chr2	237855644	237855844	+	-0.09555200000000004	0.0174157201503588	mutated p65 motif
chr2:43315592_C_T	chr2	43315492	43315692	+	0.08865900000000004	0.0321243481974405	mutated p65 motif
chr2:45510331_G_A	chr2	45510231	45510431	+	-0.14151399999999995	0.000116495341358553	mutated p65 motif
chr2:45511063_G_A	chr2	45510963	45511163	+	-0.14153899999999994	0.000116495341358553	mutated p65 motif
chr2:45517342_C_T	chr2	45517242	45517442	+	-0.11109999999999998	0.0248320944134038	mutated p65 motif
chr2:46174037_G_T	chr2	46173937	46174137	+	-0.092069	0.0498402212994314	mutated p65 motif
chr2:56217727_G_A	chr2	56217627	56217827	+	0.08985299999999996	0.0315919679763572	mutated p65 motif
chr2:65216648_G_C	chr2	65216548	65216748	+	-0.13859200000000002	0.00114796834462294	mutated p65 motif
chr2:65306905_C_T	chr2	65306805	65307005	+	0.08750900000000006	0.0141386503541211	mutated p65 motif
chr2:65308573_A_AAGC	chr2	65308473	65308673	+	0.199761	6.321465900615181e-06	mutated p65 motif
chr2:73060581_C_T	chr2	73060481	73060681	+	-0.258971	2.4770808143369798e-05	mutated p65 motif
chr2:74347308_A_C	chr2	74347208	74347408	+	0.13118799999999994	0.00954922041199235	mutated p65 motif
chr2:75823162_G_A	chr2	75823062	75823262	+	-0.299214	8.88428782339951e-06	mutated p65 motif
chr2:9391965_T_C	chr2	9391865	9392065	+	0.06797200000000002	0.0371351860068868	mutated p65 motif
chr2:9427347_A_G	chr2	9427247	9427447	+	-0.10127199999999996	0.0175086072656271	mutated p65 motif
chr2:9794655_G_A	chr2	9794555	9794755	+	0.21470500000000006	0.0014250228252633901	mutated p65 motif
chr2:9797994_C_T	chr2	9797894	9798094	+	0.18451900000000002	0.0078461766486485	mutated p65 motif
chr3:101230934_C_G	chr3	101230834	101231034	+	-0.13149	0.00466121708041822	mutated p65 motif
chr3:104078453_G_T	chr3	104078353	104078553	+	-0.163261	0.0359418547117194	mutated p65 motif
chr3:107676074_A_G	chr3	107675974	107676174	+	0.20896400000000004	1.24202873044641e-06	mutated p65 motif
chr3:11226364_G_A	chr3	11226264	11226464	+	-0.13488499999999998	0.00503773367335176	mutated p65 motif
chr3:121714391_C_T	chr3	121714291	121714491	+	-0.123195	0.0355418383580247	mutated p65 motif
chr3:131059694_A_G	chr3	131059594	131059794	+	-0.13605799999999998	0.0318793245709621	mutated p65 motif
chr3:150129743_A_C	chr3	150129643	150129843	+	0.14154699999999998	0.0051827338989509295	mutated p65 motif
chr3:152033755_T_C	chr3	152033655	152033855	+	0.12392499999999995	0.000591812776496963	mutated p65 motif
chr3:156263522_G_GACATT	chr3	156263422	156263622	+	0.13534099999999993	0.0028540489095277197	mutated p65 motif
chr3:171395025_G_A	chr3	171394925	171395125	+	-0.2604	0.000528117931991464	mutated p65 motif
chr3:171521613_A_G	chr3	171521513	171521713	+	-0.08096499999999995	4.862656328513821e-05	mutated p65 motif
chr3:171526153_C_T	chr3	171526053	171526253	+	0.04589100000000002	0.0012388691397573	mutated p65 motif
chr3:180487189_C_T	chr3	180487089	180487289	+	-0.15825500000000006	0.0185505278391937	mutated p65 motif
chr3:194877800_T_C	chr3	194877700	194877900	+	0.05926300000000007	0.0264239569238437	mutated p65 motif
chr3:25493366_A_T	chr3	25493266	25493466	+	0.16978700000000002	2.9510210269817705e-05	mutated p65 motif
chr3:27031614_T_G	chr3	27031514	27031714	+	0.15015900000000004	0.0219034679745946	mutated p65 motif
chr3:29552615_T_C	chr3	29552515	29552715	+	0.132977	0.00305409218076012	mutated p65 motif
chr3:29555976_C_A	chr3	29555876	29556076	+	0.17049499999999995	0.000829214729029593	mutated p65 motif
chr3:29568705_G_A	chr3	29568605	29568805	+	0.12072999999999999	0.0110018762053758	mutated p65 motif
chr3:37977746_C_T	chr3	37977646	37977846	+	0.17113900000000004	0.0088172793626873	mutated p65 motif
chr3:64981703_G_T	chr3	64981603	64981803	+	0.09958900000000004	0.0288742050972767	mutated p65 motif
chr3:7917014_C_A	chr3	7916914	7917114	+	-0.10331399999999996	0.0106669474948634	mutated p65 motif
chr3:98497659_C_A	chr3	98497559	98497759	+	-0.19422399999999995	1.24612285259266e-10	mutated p65 motif
chr4:10090930_C_A	chr4	10090830	10091030	+	0.07856800000000007	0.0003109187233505629	mutated p65 motif
chr4:10103890_T_C	chr4	10103790	10103990	+	0.052456000000000065	0.0133877960073429	mutated p65 motif
chr4:10125990_A_G	chr4	10125890	10126090	+	0.13601800000000008	7.02960214155148e-05	mutated p65 motif
chr4:101505834_C_A	chr4	101505734	101505934	+	-0.337604	2.67675977186743e-17	mutated p65 motif
chr4:102098573_G_A	chr4	102098473	102098673	+	0.10872899999999996	0.0178404891591807	mutated p65 motif
chr4:107946213_C_G	chr4	107946113	107946313	+	0.05126700000000006	0.019344630396763	mutated p65 motif
chr4:108615679_TG_T	chr4	108615579	108615779	+	0.13429499999999994	0.00848850260363587	mutated p65 motif
chr4:113193540_A_T	chr4	113193440	113193640	+	-0.16143400000000002	0.00155651592074296	mutated p65 motif
chr4:142749219_T_C	chr4	142749119	142749319	+	0.11693999999999992	0.0450542765515275	mutated p65 motif
chr4:16419601_C_A	chr4	16419501	16419701	+	-0.150013	4.0552260317978e-05	mutated p65 motif
chr4:167954844_G_A	chr4	167954744	167954944	+	-0.106786	0.0362160160287103	mutated p65 motif
chr4:169306322_T_A	chr4	169306222	169306422	+	0.12977799999999995	7.3893334378961505e-06	mutated p65 motif
chr4:177804404_G_T	chr4	177804304	177804504	+	0.315446	2.2731931925052105e-17	mutated p65 motif
chr4:186797287_G_A	chr4	186797187	186797387	+	0.17055499999999998	0.00475867296857154	mutated p65 motif
chr4:2418445_C_G	chr4	2418345	2418545	+	0.08513100000000008	0.0110609190187454	mutated p65 motif
chr4:30762002_C_A	chr4	30761902	30762102	+	0.12541999999999998	2.23494654538861e-06	mutated p65 motif
chr4:37551527_G_A	chr4	37551427	37551627	+	0.17054499999999995	0.00857101008675045	mutated p65 motif
chr4:38080460_C_T	chr4	38080360	38080560	+	0.13558699999999999	0.0189959550568628	mutated p65 motif
chr4:41330982_T_C	chr4	41330882	41331082	+	-0.12766	0.0262908412795502	mutated p65 motif
chr4:4249974_C_A	chr4	4249874	4250074	+	0.09980299999999998	0.008555254169552171	mutated p65 motif
chr4:48072366_T_A	chr4	48072266	48072466	+	0.3460479999999999	6.785981243222691e-16	mutated p65 motif
chr4:48073501_G_T	chr4	48073401	48073601	+	-0.353854	3.78182795156322e-24	mutated p65 motif
chr4:5020342_G_A	chr4	5020242	5020442	+	0.13497099999999995	0.000352238733810748	mutated p65 motif
chr4:56043208_T_C	chr4	56043108	56043308	+	-0.19166700000000006	3.08601396553411e-07	mutated p65 motif
chr4:5747078_A_G	chr4	5746978	5747178	+	-0.046300000000000015	0.0114948759651768	mutated p65 motif
chr4:5749262_C_T	chr4	5749162	5749362	+	0.197317	8.406614218524849e-34	mutated p65 motif
chr4:57940018_G_C	chr4	57939918	57940118	+	0.049966999999999984	0.00127284980598545	mutated p65 motif
chr4:74959996_A_G	chr4	74959896	74960096	+	-0.123365	0.000751047359009874	mutated p65 motif
chr4:86761733_G_T	chr4	86761633	86761833	+	0.14275400000000005	0.0129457325426382	mutated p65 motif
chr4:97597593_G_A	chr4	97597493	97597693	+	-0.195548	0.00430524076872889	mutated p65 motif
chr5:106032729_G_A	chr5	106032629	106032829	+	0.2215010000000001	0.00012303858001354296	mutated p65 motif
chr5:106466498_T_C	chr5	106466398	106466598	+	-0.109885	0.00457882234877082	mutated p65 motif
chr5:126437419_T_C	chr5	126437319	126437519	+	-0.15576100000000004	0.0231690538150281	mutated p65 motif
chr5:137936905_T_G	chr5	137936805	137937005	+	0.17925600000000008	0.0262251315215778	mutated p65 motif
chr5:141215402_A_G	chr5	141215302	141215502	+	0.14530699999999994	4.68246600766036e-05	mutated p65 motif
chr5:141217607_C_T	chr5	141217507	141217707	+	0.14538799999999996	4.68246600766036e-05	mutated p65 motif
chr5:145235760_G_A	chr5	145235660	145235860	+	0.15696299999999996	0.0183165247612307	mutated p65 motif
chr5:148824841_G_A	chr5	148824741	148824941	+	-0.14902300000000002	0.000691662196466181	mutated p65 motif
chr5:169403776_T_G	chr5	169403676	169403876	+	-0.05087700000000006	0.0188070803365455	mutated p65 motif
chr5:169481492_T_C	chr5	169481392	169481592	+	-0.13700300000000004	0.0321541225447894	mutated p65 motif
chr5:172338616_G_A	chr5	172338516	172338716	+	0.094186	0.0391735376761745	mutated p65 motif
chr5:178450693_T_C	chr5	178450593	178450793	+	0.11858500000000005	0.00732379398677305	mutated p65 motif
chr5:180288239_G_A	chr5	180288139	180288339	+	0.1278729999999999	0.0119705066872679	mutated p65 motif
chr5:270798_T_C	chr5	270698	270898	+	0.113981	0.0101626894319059	mutated p65 motif
chr5:39428399_C_T	chr5	39428299	39428499	+	0.07018100000000005	0.000101427553000159	mutated p65 motif
chr5:39429049_C_T	chr5	39428949	39429149	+	0.06931200000000004	0.000112732569698168	mutated p65 motif
chr5:39547171_G_GT	chr5	39547071	39547271	+	0.07534399999999998	0.0169674180033705	mutated p65 motif
chr5:41263588_C_G	chr5	41263488	41263688	+	0.145602	0.030494587153408	mutated p65 motif
chr5:52657068_A_G	chr5	52656968	52657168	+	0.233553	7.989903771388161e-10	mutated p65 motif
chr5:52663928_A_G	chr5	52663828	52664028	+	0.240625	7.989903771388161e-10	mutated p65 motif
chr5:52663996_C_A	chr5	52663896	52664096	+	0.17052	1.36274258026604e-06	mutated p65 motif
chr5:56681325_T_C	chr5	56681225	56681425	+	-0.05015299999999995	0.0239171723985659	mutated p65 motif
chr5:67307918_G_A	chr5	67307818	67308018	+	0.278154	7.99926813945523e-08	mutated p65 motif
chr5:72451804_G_A	chr5	72451704	72451904	+	-0.212671	0.000497538119423525	mutated p65 motif
chr5:75940377_A_G	chr5	75940277	75940477	+	0.08643100000000004	0.0011540380724307801	mutated p65 motif
chr5:8783425_C_T	chr5	8783325	8783525	+	-0.184349	0.025497054607673	mutated p65 motif
chr5:94412560_A_T	chr5	94412460	94412660	+	-0.148208	0.0389643906361723	mutated p65 motif
chr6:100744264_T_C	chr6	100744164	100744364	+	0.04365600000000003	0.0366324991749668	mutated p65 motif
chr6:100748896_T_C	chr6	100748796	100748996	+	-0.08763300000000003	0.00209720113074646	mutated p65 motif
chr6:100750194_G_A	chr6	100750094	100750294	+	-0.08963000000000004	0.00209720113074646	mutated p65 motif
chr6:104514169_C_T	chr6	104514069	104514269	+	0.11638900000000008	0.0386172787568995	mutated p65 motif
chr6:11750519_G_A	chr6	11750419	11750619	+	-0.233037	3.0331427642121003e-05	mutated p65 motif
chr6:131423233_C_T	chr6	131423133	131423333	+	0.246366	1.51059901299816e-12	mutated p65 motif
chr6:144125804_A_T	chr6	144125704	144125904	+	0.08728000000000002	0.0131994449175423	mutated p65 motif
chr6:152635846_G_A	chr6	152635746	152635946	+	0.09345200000000008	0.0181610363467093	mutated p65 motif
chr6:153323142_C_T	chr6	153323042	153323242	+	0.120429	0.00028649246741932596	mutated p65 motif
chr6:154830717_G_A	chr6	154830617	154830817	+	0.15514399999999995	0.039054532843872	mutated p65 motif
chr6:158421274_T_C	chr6	158421174	158421374	+	-0.114417	0.00233886885585213	mutated p65 motif
chr6:17394768_G_A	chr6	17394668	17394868	+	-0.256725	3.00646762342337e-05	mutated p65 motif
chr6:18498606_A_T	chr6	18498506	18498706	+	0.11486400000000008	0.00941332963427614	mutated p65 motif
chr6:2991350_C_T	chr6	2991250	2991450	+	-0.06191000000000003	0.0300397699749665	mutated p65 motif
chr6:3038311_A_G	chr6	3038211	3038411	+	0.20750300000000002	0.0129509181160981	mutated p65 motif
chr6:30768955_A_G	chr6	30768855	30769055	+	0.20803200000000002	3.18683806918683e-10	mutated p65 motif
chr6:30770778_C_G	chr6	30770678	30770878	+	0.17501699999999998	4.93161312564876e-07	mutated p65 motif
chr6:30773386_A_C	chr6	30773286	30773486	+	0.11928400000000006	0.0418211998532012	mutated p65 motif
chr6:31363794_A_G	chr6	31363694	31363894	+	-0.238534	4.71118338628492e-05	mutated p65 motif
chr6:31363798_C_G	chr6	31363698	31363898	+	-0.238534	4.71118338628492e-05	mutated p65 motif
chr6:31363847_C_T	chr6	31363747	31363947	+	-0.252539	2.21522380841094e-05	mutated p65 motif
chr6:31367989_C_A	chr6	31367889	31368089	+	0.06062400000000001	0.0361182749053337	mutated p65 motif
chr6:32222706_A_G	chr6	32222606	32222806	+	-0.057529	0.00185478126939276	mutated p65 motif
chr6:33739716_CGCCCGCCCTGGGGCT_C	chr6	33739616	33739816	+	-0.053333999999999986	0.0419286762592466	mutated p65 motif
chr6:33739731_T_C	chr6	33739631	33739831	+	-0.053726	0.0419286762592466	mutated p65 motif
chr6:34273958_T_C	chr6	34273858	34274058	+	-0.16228299999999998	0.0149296469282206	mutated p65 motif
chr6:3811962_T_C	chr6	3811862	3812062	+	0.06781499999999996	0.0218142069930307	mutated p65 motif
chr6:38768483_G_T	chr6	38768383	38768583	+	-0.15052500000000002	0.00011888134969014399	mutated p65 motif
chr6:3916713_C_T	chr6	3916613	3916813	+	0.08162000000000003	0.0129299259121157	mutated p65 motif
chr6:3917007_G_C	chr6	3916907	3917107	+	0.08155500000000004	0.0129299259121157	mutated p65 motif
chr6:3917121_C_T	chr6	3917021	3917221	+	0.08155500000000004	0.0129299259121157	mutated p65 motif
chr6:44691878_T_C	chr6	44691778	44691978	+	0.16476800000000005	3.730549823493e-05	mutated p65 motif
chr6:4600610_A_G	chr6	4600510	4600710	+	0.15395000000000006	0.00516523714706204	mutated p65 motif
chr6:46915779_G_T	chr6	46915679	46915879	+	-0.14300799999999994	0.0199743623251056	mutated p65 motif
chr6:52217699_A_G	chr6	52217599	52217799	+	-0.14441400000000001	0.00136792629667362	mutated p65 motif
chr6:54158799_C_T	chr6	54158699	54158899	+	-0.090366	0.0173961705225238	mutated p65 motif
chr6:56200590_A_G	chr6	56200490	56200690	+	-0.13442500000000002	0.000705429027564569	mutated p65 motif
chr6:5680006_A_G	chr6	5679906	5680106	+	0.14754299999999998	0.0256717553256645	mutated p65 motif
chr6:74500009_G_T	chr6	74499909	74500109	+	-0.07440399999999997	0.0338478755783536	mutated p65 motif
chr6:7907884_G_C	chr6	7907784	7907984	+	-0.13546799999999998	0.0156868748623297	mutated p65 motif
chr6:85750834_C_T	chr6	85750734	85750934	+	-0.17950900000000006	0.010379856227626	mutated p65 motif
chr7:108042910_A_G	chr7	108042810	108043010	+	-0.22896500000000006	1.6585010411853306e-05	mutated p65 motif
chr7:111385672_G_A	chr7	111385572	111385772	+	0.14444	0.0328542400276143	mutated p65 motif
chr7:115941428_G_C	chr7	115941328	115941528	+	0.15060399999999996	0.000717978257296401	mutated p65 motif
chr7:137665321_T_C	chr7	137665221	137665421	+	-0.200992	6.400940511403489e-06	mutated p65 motif
chr7:151284362_A_G	chr7	151284262	151284462	+	0.2762140000000001	7.142207963068571e-11	mutated p65 motif
chr7:155005098_G_A	chr7	155004998	155005198	+	0.18834300000000004	0.00113969932300932	mutated p65 motif
chr7:17029952_C_A	chr7	17029852	17030052	+	0.12690800000000002	0.0436225500697968	mutated p65 motif
chr7:20555726_T_C	chr7	20555626	20555826	+	0.10131400000000003	0.0269325097289547	mutated p65 motif
chr7:22736446_T_G	chr7	22736346	22736546	+	-0.147748	0.000188293656871426	mutated p65 motif
chr7:22896231_G_C	chr7	22896131	22896331	+	0.09949600000000004	0.0467777329062847	mutated p65 motif
chr7:27159405_C_T	chr7	27159305	27159505	+	0.06739200000000001	0.00075041089463113	mutated p65 motif
chr7:34788176_G_C	chr7	34788076	34788276	+	-0.189924	0.00166199923558492	mutated p65 motif
chr7:46919290_A_T	chr7	46919190	46919390	+	-0.11083000000000004	0.007051655390885741	mutated p65 motif
chr7:47731716_G_A	chr7	47731616	47731816	+	0.33042399999999994	2.9582815973245608e-06	mutated p65 motif
chr7:48123695_C_T	chr7	48123595	48123795	+	-0.07756800000000003	0.0429963084997191	mutated p65 motif
chr7:76003085_T_G	chr7	76002985	76003185	+	-0.204612	0.00011558406140925501	mutated p65 motif
chr7:77086414_C_T	chr7	77086314	77086514	+	0.126788	0.0223913839057209	mutated p65 motif
chr7:77086497_G_A	chr7	77086397	77086597	+	0.158095	0.00628074976109514	mutated p65 motif
chr7:92641079_C_G	chr7	92640979	92641179	+	0.12594499999999995	0.0158156089369527	mutated p65 motif
chr8:103801557_C_T	chr8	103801457	103801657	+	-0.219565	0.00013450891691388402	mutated p65 motif
chr8:10643233_G_T	chr8	10643133	10643333	+	0.12946999999999995	0.00649019137880516	mutated p65 motif
chr8:118720556_G_T	chr8	118720456	118720656	+	0.09973500000000002	0.0412233923577487	mutated p65 motif
chr8:119457472_A_G	chr8	119457372	119457572	+	0.06938	0.00106194254120689	mutated p65 motif
chr8:13221386_C_G	chr8	13221286	13221486	+	-0.06250800000000001	0.000755291732514459	mutated p65 motif
chr8:13224375_G_C	chr8	13224275	13224475	+	0.11803200000000005	1.0841824998260301e-12	mutated p65 motif
chr8:13513592_C_T	chr8	13513492	13513692	+	0.13221899999999998	5.7891601159280394e-05	mutated p65 motif
chr8:13517411_G_C	chr8	13517311	13517511	+	0.06324099999999999	0.0251639983478945	mutated p65 motif
chr8:141964183_C_T	chr8	141964083	141964283	+	0.10945100000000008	3.10073510102681e-05	mutated p65 motif
chr8:17208196_T_G	chr8	17208096	17208296	+	0.147671	0.00934290537644384	mutated p65 motif
chr8:17455135_T_C	chr8	17455035	17455235	+	-0.114832	0.00694283913809445	mutated p65 motif
chr8:17468194_A_G	chr8	17468094	17468294	+	0.201812	1.0293533313747599e-23	mutated p65 motif
chr8:1861883_A_G	chr8	1861783	1861983	+	-0.213027	0.0450390128161302	mutated p65 motif
chr8:19327507_G_A	chr8	19327407	19327607	+	-0.241612	8.43793606946861e-06	mutated p65 motif
chr8:19389899_G_A	chr8	19389799	19389999	+	0.16461499999999996	0.00190359559608595	mutated p65 motif
chr8:19611237_G_A	chr8	19611137	19611337	+	-0.13538899999999998	0.0015526981894914199	mutated p65 motif
chr8:20286132_A_G	chr8	20286032	20286232	+	-0.41289899999999996	1.80984894432158e-14	mutated p65 motif
chr8:20286501_T_G	chr8	20286401	20286601	+	-0.357454	3.996847621117661e-11	mutated p65 motif
chr8:20286552_G_T	chr8	20286452	20286652	+	-0.357705	3.996847621117661e-11	mutated p65 motif
chr8:23019702_G_C	chr8	23019602	23019802	+	0.16319899999999998	2.41164382625546e-05	mutated p65 motif
chr8:23177083_A_C	chr8	23176983	23177183	+	-0.14609699999999998	1.6273085224197e-05	mutated p65 motif
chr8:26316404_T_C	chr8	26316304	26316504	+	0.08925699999999992	0.0423804723095055	mutated p65 motif
chr8:27530634_C_T	chr8	27530534	27530734	+	0.194763	0.00284428661799068	mutated p65 motif
chr8:27542849_A_C	chr8	27542749	27542949	+	0.12053699999999999	0.00681236591925204	mutated p65 motif
chr8:32190403_A_G	chr8	32190303	32190503	+	0.03612799999999994	0.0386256522335258	mutated p65 motif
chr8:32420734_A_G	chr8	32420634	32420834	+	0.13253700000000002	0.0209034872708478	mutated p65 motif
chr8:32420989_G_T	chr8	32420889	32421089	+	0.13246999999999998	0.0209034872708478	mutated p65 motif
chr8:32424421_A_G	chr8	32424321	32424521	+	0.07993400000000006	0.0429480944278039	mutated p65 motif
chr8:34523030_G_C	chr8	34522930	34523130	+	0.16786599999999996	0.0159907413968551	mutated p65 motif
chr8:34524021_C_T	chr8	34523921	34524121	+	0.188415	0.0159907413968551	mutated p65 motif
chr8:39797471_G_C	chr8	39797371	39797571	+	0.14742200000000005	0.0243942695925329	mutated p65 motif
chr8:42547333_T_C	chr8	42547233	42547433	+	0.10099799999999992	0.0487092983756643	mutated p65 motif
chr8:5874500_A_G	chr8	5874400	5874600	+	0.08197299999999996	0.008639518149184929	mutated p65 motif
chr8:61149444_C_T	chr8	61149344	61149544	+	-0.12820399999999998	0.00504942721336309	mutated p65 motif
chr8:61150373_C_T	chr8	61150273	61150473	+	0.11346499999999993	0.00629841246015536	mutated p65 motif
chr8:6344516_C_T	chr8	6344416	6344616	+	-0.041105	0.00805319496063482	mutated p65 motif
chr8:68892654_C_A	chr8	68892554	68892754	+	0.07380699999999996	0.0317105442928118	mutated p65 motif
chr8:74283383_C_<	chr8	74283283	74283483	+	-0.28208099999999997	1.8709118050423494e-09	mutated p65 motif
chr8:8188231_G_A	chr8	8188131	8188331	+	0.13482399999999994	2.5336968243805303e-06	mutated p65 motif
chr8:8189586_T_G	chr8	8189486	8189686	+	0.1096689999999999	5.02117357972659e-06	mutated p65 motif
chr8:8481554_T_G	chr8	8481454	8481654	+	-0.10054400000000002	0.00238856051852853	mutated p65 motif
chr8:8485705_C_T	chr8	8485605	8485805	+	0.096522	0.00162373109220744	mutated p65 motif
chr8:8794454_G_A	chr8	8794354	8794554	+	0.18658999999999992	0.00014184800601081698	mutated p65 motif
chr8:95876868_G_A	chr8	95876768	95876968	+	-0.16378899999999996	4.28359309669574e-05	mutated p65 motif
chr8:95877285_C_T	chr8	95877185	95877385	+	-0.163675	4.28359309669574e-05	mutated p65 motif
chr8:95959808_A_G	chr8	95959708	95959908	+	0.11731099999999994	0.0024536419591217303	mutated p65 motif
chr9:117313489_A_C	chr9	117313389	117313589	+	0.139096	0.0360630837463705	mutated p65 motif
chr9:131900920_C_T	chr9	131900820	131901020	+	-0.123884	0.00541802561584733	mutated p65 motif
chr9:132249694_C_T	chr9	132249594	132249794	+	0.13760699999999992	1.68776815613144e-05	mutated p65 motif
chr9:13803515_A_C	chr9	13803415	13803615	+	0.20194	5.855802883641601e-05	mutated p65 motif
chr9:139049823_G_A	chr9	139049723	139049923	+	0.08235500000000008	0.00842887441758942	mutated p65 motif
chr9:18184645_C_A	chr9	18184545	18184745	+	0.239938	0.00034088495232285096	mutated p65 motif
chr9:18393763_T_G	chr9	18393663	18393863	+	0.194704	8.88159468922024e-05	mutated p65 motif
chr9:21595717_T_C	chr9	21595617	21595817	+	0.11048000000000002	0.000517592830715112	mutated p65 motif
chr9:35952224_T_C	chr9	35952124	35952324	+	0.11962700000000005	0.00760291738374895	mutated p65 motif
chr9:4496265_A_T	chr9	4496165	4496365	+	-0.110197	0.0316375420795077	mutated p65 motif
chr9:698752_A_G	chr9	698652	698852	+	0.08146999999999993	0.0267039790488048	mutated p65 motif
chr9:71714693_C_T	chr9	71714593	71714793	+	0.11691900000000001	0.00174100093358044	mutated p65 motif
chr9:72871430_G_C	chr9	72871330	72871530	+	0.16791899999999993	0.0024755489287527892	mutated p65 motif
chr9:78936564_G_A	chr9	78936464	78936664	+	0.1730520000000001	0.00835299832849693	mutated p65 motif
chr9:79318998_A_G	chr9	79318898	79319098	+	0.07377800000000001	0.0468978111641894	mutated p65 motif
chr9:85836913_G_C	chr9	85836813	85837013	+	0.066998	3.1624233864523905e-05	mutated p65 motif
chr10:104386934_T_C	chr10	104386834	104387034	+	0.16676899999999995	1.2862537113991197e-07	mutated ERG motif
chr10:104953547_T_C	chr10	104953447	104953647	+	0.21923100000000006	6.34495863759122e-07	mutated ERG motif
chr10:120513020_A_G	chr10	120512920	120513120	+	0.10203799999999996	0.0457504330468957	mutated ERG motif
chr10:127644546_C_A	chr10	127644446	127644646	+	-0.14923499999999998	0.0442319081606797	mutated ERG motif
chr10:134000422_C_T	chr10	134000322	134000522	+	-0.164686	0.0257663840619804	mutated ERG motif
chr10:14030921_C_T	chr10	14030821	14031021	+	0.083816	1.05664346156949e-06	mutated ERG motif
chr10:14031188_A_G	chr10	14031088	14031288	+	0.08437499999999998	1.05664346156949e-06	mutated ERG motif
chr10:17048022_C_T	chr10	17047922	17048122	+	0.10273500000000002	0.00778172849195254	mutated ERG motif
chr10:17250978_C_T	chr10	17250878	17251078	+	-0.146606	0.00154425910524487	mutated ERG motif
chr10:17629465_G_A	chr10	17629365	17629565	+	0.13750299999999993	0.0158917172478102	mutated ERG motif
chr10:29845316_A_G	chr10	29845216	29845416	+	0.27740600000000004	3.50590893558868e-08	mutated ERG motif
chr10:29870482_C_T	chr10	29870382	29870582	+	0.158339	0.00373782065081452	mutated ERG motif
chr10:29874015_C_T	chr10	29873915	29874115	+	0.29277800000000004	3.5126177436895602e-09	mutated ERG motif
chr10:31110308_T_C	chr10	31110208	31110408	+	-0.075901	5.37666299754709e-05	mutated ERG motif
chr10:3849302_C_A	chr10	3849202	3849402	+	0.06662000000000001	0.00227607474164073	mutated ERG motif
chr10:3849608_C_A	chr10	3849508	3849708	+	0.05762200000000006	0.005272501359582821	mutated ERG motif
chr10:3965100_C_T	chr10	3965000	3965200	+	-0.09688800000000004	0.000289916640832205	mutated ERG motif
chr10:3966697_A_T	chr10	3966597	3966797	+	-0.09687099999999997	0.000289916640832205	mutated ERG motif
chr10:3966766_A_T	chr10	3966666	3966866	+	-0.09682800000000004	0.000289916640832205	mutated ERG motif
chr10:4847924_C_T	chr10	4847824	4848024	+	0.03000200000000008	0.0493034738496023	mutated ERG motif
chr10:4901247_T_C	chr10	4901147	4901347	+	0.184006	0.012764555950548	mutated ERG motif
chr10:4909869_G_A	chr10	4909769	4909969	+	0.07693400000000006	0.0376712003912891	mutated ERG motif
chr10:50392711_G_A	chr10	50392611	50392811	+	0.22171800000000008	9.6495708969676e-05	mutated ERG motif
chr10:50760434_A_G	chr10	50760334	50760534	+	0.22393699999999994	9.31888662773418e-10	mutated ERG motif
chr10:56904461_G_A	chr10	56904361	56904561	+	-0.275175	1.26772108335286e-10	mutated ERG motif
chr10:56906707_G_A	chr10	56906607	56906807	+	0.316159	5.62050267440543e-19	mutated ERG motif
chr10:59732432_T_C	chr10	59732332	59732532	+	-0.261316	1.7703097412491002e-09	mutated ERG motif
chr10:59733269_A_C	chr10	59733169	59733369	+	-0.24517100000000006	1.7703097412491002e-09	mutated ERG motif
chr10:59785054_CCT_C	chr10	59784954	59785154	+	0.09026	0.0024639047539965	mutated ERG motif
chr10:60276369_T_C	chr10	60276269	60276469	+	-0.099356	0.0378725844960145	mutated ERG motif
chr10:60278140_C_T	chr10	60278040	60278240	+	-0.09928400000000004	0.0378725844960145	mutated ERG motif
chr10:70848771_C_T	chr10	70848671	70848871	+	0.09096400000000003	0.008367922619494029	mutated ERG motif
chr10:71580862_C_G	chr10	71580762	71580962	+	0.144505	2.04177175558158e-08	mutated ERG motif
chr10:71581783_A_G	chr10	71581683	71581883	+	-0.13461499999999998	6.61561988627814e-05	mutated ERG motif
chr10:79607092_G_A	chr10	79606992	79607192	+	0.14963100000000007	0.0231998452006015	mutated ERG motif
chr10:85092613_G_C	chr10	85092513	85092713	+	-0.226998	0.0263656000554156	mutated ERG motif
chr10:91174919_C_T	chr10	91174819	91175019	+	-0.098885	0.0169846286678175	mutated ERG motif
chr10:98981092_G_A	chr10	98980992	98981192	+	-0.20421300000000006	0.009620707503985	mutated ERG motif
chr11:103507975_C_T	chr11	103507875	103508075	+	-0.047597	0.00217921120710642	mutated ERG motif
chr11:103512513_C_T	chr11	103512413	103512613	+	0.04837100000000005	0.00217921120710642	mutated ERG motif
chr11:104005510_G_A	chr11	104005410	104005610	+	-0.199881	0.0165503020179233	mutated ERG motif
chr11:104005673_G_C	chr11	104005573	104005773	+	-0.200075	0.0165503020179233	mutated ERG motif
chr11:108739776_G_A	chr11	108739676	108739876	+	0.329241	7.775232894839348e-23	mutated ERG motif
chr11:109786191_T_G	chr11	109786091	109786291	+	0.11249600000000004	0.0227980758322721	mutated ERG motif
chr11:109787226_T_C	chr11	109787126	109787326	+	0.12688500000000005	0.0171553091643756	mutated ERG motif
chr11:110181512_A_G	chr11	110181412	110181612	+	0.13916700000000004	6.762559433867679e-05	mutated ERG motif
chr11:113503067_C_T	chr11	113502967	113503167	+	0.13187099999999996	0.0181581709815854	mutated ERG motif
chr11:12038130_C_T	chr11	12038030	12038230	+	-0.12809699999999996	0.000137557805665323	mutated ERG motif
chr11:12038535_T_A	chr11	12038435	12038635	+	-0.12807199999999996	0.000137557805665323	mutated ERG motif
chr11:12204581_T_C	chr11	12204481	12204681	+	0.03720800000000002	0.000676452765782005	mutated ERG motif
chr11:12227005_T_G	chr11	12226905	12227105	+	0.04078900000000008	0.0124957530908519	mutated ERG motif
chr11:12229489_G_A	chr11	12229389	12229589	+	0.05913999999999998	0.0417040904365139	mutated ERG motif
chr11:12246233_G_C	chr11	12246133	12246333	+	-0.11990500000000005	2.71114348087533e-08	mutated ERG motif
chr11:12302837_C_G	chr11	12302737	12302937	+	-0.08896199999999999	0.00029877199126511	mutated ERG motif
chr11:125495044_G_A	chr11	125494944	125495144	+	0.07010699999999992	0.0308488233268851	mutated ERG motif
chr11:128528593_G_A	chr11	128528493	128528693	+	0.293435	1.27761738920064e-05	mutated ERG motif
chr11:23493556_G_T	chr11	23493456	23493656	+	-0.17993899999999996	3.7589062602826e-06	mutated ERG motif
chr11:27313945_C_T	chr11	27313845	27314045	+	-0.14684999999999998	0.0433786263597474	mutated ERG motif
chr11:3078885_T_G	chr11	3078785	3078985	+	0.145629	0.0289757341985865	mutated ERG motif
chr11:32125855_A_G	chr11	32125755	32125955	+	0.11777499999999995	0.00293750792128473	mutated ERG motif
chr11:36434318_C_A	chr11	36434218	36434418	+	0.12473800000000003	0.0433784151177507	mutated ERG motif
chr11:42338212_T_TG	chr11	42338112	42338312	+	-0.135021	0.000443634192784316	mutated ERG motif
chr11:68623978_C_T	chr11	68623878	68624078	+	0.13510299999999995	0.037480811201259005	mutated ERG motif
chr11:75265957_C_T	chr11	75265857	75266057	+	-0.18643000000000004	0.00185911625073207	mutated ERG motif
chr11:7627352_C_A	chr11	7627252	7627452	+	0.08289199999999998	0.0103873160907405	mutated ERG motif
chr11:76327806_A_G	chr11	76327706	76327906	+	-0.12134899999999997	0.011151607628852	mutated ERG motif
chr11:76327960_A_G	chr11	76327860	76328060	+	-0.11025799999999997	0.011151607628852	mutated ERG motif
chr11:82564357_A_G	chr11	82564257	82564457	+	-0.10589699999999996	8.41255393089037e-05	mutated ERG motif
chr11:831122_C_T	chr11	831022	831222	+	-0.184521	7.07312017217531e-11	mutated ERG motif
chr11:834098_C_T	chr11	833998	834198	+	-0.18876	5.95142562928587e-11	mutated ERG motif
chr11:86978002_G_A	chr11	86977902	86978102	+	0.19082700000000008	1.2094391509102901e-05	mutated ERG motif
chr11:9720183_T_C	chr11	9720083	9720283	+	-0.083237	0.00854043120890888	mutated ERG motif
chr11:97837287_T_C	chr11	97837187	97837387	+	0.09979799999999994	0.0238389453098748	mutated ERG motif
chr12:109896297_T_A	chr12	109896197	109896397	+	0.174176	9.83582289094943e-07	mutated ERG motif
chr12:120051269_A_G	chr12	120051169	120051369	+	-0.287794	3.215624348111169e-07	mutated ERG motif
chr12:123163848_G_T	chr12	123163748	123163948	+	0.15608999999999995	0.0046093999672744	mutated ERG motif
chr12:12487680_C_T	chr12	12487580	12487780	+	0.17857200000000004	0.00046170995027672003	mutated ERG motif
chr12:12592791_G_A	chr12	12592691	12592891	+	-0.154167	7.84976548660385e-05	mutated ERG motif
chr12:129279264_G_A	chr12	129279164	129279364	+	0.16172899999999998	6.3607476858929294e-06	mutated ERG motif
chr12:129282180_T_C	chr12	129282080	129282280	+	-0.280724	7.24140040560083e-18	mutated ERG motif
chr12:129283149_T_C	chr12	129283049	129283249	+	-0.284629	1.00277748583401e-17	mutated ERG motif
chr12:129287449_G_A	chr12	129287349	129287549	+	0.22762799999999994	1.8577787318586106e-08	mutated ERG motif
chr12:14520241_T_C	chr12	14520141	14520341	+	0.183577	1.6790063741923595e-05	mutated ERG motif
chr12:14573499_C_G	chr12	14573399	14573599	+	0.09461700000000006	0.0487561283105679	mutated ERG motif
chr12:19211642_T_C	chr12	19211542	19211742	+	0.100966	0.00151001601576923	mutated ERG motif
chr12:20533594_T_C	chr12	20533494	20533694	+	0.07322399999999996	0.0255921312810066	mutated ERG motif
chr12:22437985_A_C	chr12	22437885	22438085	+	-0.10376700000000001	0.00155805106343229	mutated ERG motif
chr12:25194025_G_A	chr12	25193925	25194125	+	-0.21223400000000006	0.0052592806414475	mutated ERG motif
chr12:25941730_T_C	chr12	25941630	25941830	+	0.15380499999999994	0.0025999590321666697	mutated ERG motif
chr12:25947810_A_T	chr12	25947710	25947910	+	0.15396500000000002	0.0025999590321666697	mutated ERG motif
chr12:26801236_T_C	chr12	26801136	26801336	+	0.180944	0.000102280610120653	mutated ERG motif
chr12:31176335_G_A	chr12	31176235	31176435	+	0.18023	1.47449767469693e-10	mutated ERG motif
chr12:31903545_A_G	chr12	31903445	31903645	+	0.053478999999999936	0.0292994166056362	mutated ERG motif
chr12:32050188_A_G	chr12	32050088	32050288	+	0.10549200000000004	0.0142265848327925	mutated ERG motif
chr12:3206391_T_C	chr12	3206291	3206491	+	-0.07101899999999994	0.0424901238332955	mutated ERG motif
chr12:43359671_C_T	chr12	43359571	43359771	+	0.08857700000000003	0.0497534892669833	mutated ERG motif
chr12:52295439_C_T	chr12	52295339	52295539	+	0.08476300000000002	0.0275588507874645	mutated ERG motif
chr12:6292773_T_C	chr12	6292673	6292873	+	0.07599599999999995	3.7535914742645798e-06	mutated ERG motif
chr12:64062496_T_C	chr12	64062396	64062596	+	-0.181733	0.00398821697000338	mutated ERG motif
chr12:6928905_A_G	chr12	6928805	6929005	+	0.11032299999999996	0.0311930744446592	mutated ERG motif
chr12:70995497_C_T	chr12	70995397	70995597	+	0.13658400000000004	7.88454244933784e-10	mutated ERG motif
chr12:76238406_A_G	chr12	76238306	76238506	+	0.102198	0.0236665765111466	mutated ERG motif
chr12:94198612_A_G	chr12	94198512	94198712	+	0.14813500000000002	0.0153024720523928	mutated ERG motif
chr12:94984482_A_G	chr12	94984382	94984582	+	-0.288564	9.563075609596e-10	mutated ERG motif
chr12:96878642_T_G	chr12	96878542	96878742	+	0.11424499999999993	0.0425764704221716	mutated ERG motif
chr13:101013404_A_G	chr13	101013304	101013504	+	0.17957500000000004	0.012419716354616	mutated ERG motif
chr13:105797528_C_G	chr13	105797428	105797628	+	0.213803	0.00834960360944251	mutated ERG motif
chr13:107302868_C_T	chr13	107302768	107302968	+	0.15415	0.0111982174425748	mutated ERG motif
chr13:108012563_A_C	chr13	108012463	108012663	+	-0.198248	0.0023831201068393397	mutated ERG motif
chr13:108022451_C_A	chr13	108022351	108022551	+	-0.06011000000000005	0.0160925813270569	mutated ERG motif
chr13:108022591_G_A	chr13	108022491	108022691	+	-0.06030699999999994	0.0448209902122805	mutated ERG motif
chr13:24710471_C_T	chr13	24710371	24710571	+	0.17891999999999994	0.00353003189663269	mutated ERG motif
chr13:24710643_T_A	chr13	24710543	24710743	+	0.17906699999999998	0.00353003189663269	mutated ERG motif
chr13:36850446_G_T	chr13	36850346	36850546	+	-0.210021	0.000648502212188721	mutated ERG motif
chr13:39145560_A_G	chr13	39145460	39145660	+	0.39643	4.038479916860141e-14	mutated ERG motif
chr13:43598575_T_G	chr13	43598475	43598675	+	-0.113605	0.0025949838479599	mutated ERG motif
chr13:48618170_C_T	chr13	48618070	48618270	+	-0.09240199999999997	0.0327531992129888	mutated ERG motif
chr13:64574475_C_A	chr13	64574375	64574575	+	-0.17469400000000002	0.0359611369694483	mutated ERG motif
chr13:64806902_A_G	chr13	64806802	64807002	+	0.17837499999999995	2.22593661932824e-09	mutated ERG motif
chr13:66467302_G_A	chr13	66467202	66467402	+	-0.08476999999999996	0.007866286604866041	mutated ERG motif
chr13:67235611_G_A	chr13	67235511	67235711	+	0.13805	0.00919301242084041	mutated ERG motif
chr13:79181332_C_G	chr13	79181232	79181432	+	-0.175081	0.000131929517738499	mutated ERG motif
chr13:79185040_C_CT	chr13	79184940	79185140	+	-0.11925200000000002	0.00465999749142309	mutated ERG motif
chr13:95911557_C_A	chr13	95911457	95911657	+	0.20287500000000006	3.24457650054415e-06	mutated ERG motif
chr13:95939819_T_C	chr13	95939719	95939919	+	0.248424	4.64934935964127e-06	mutated ERG motif
chr13:96134036_A_G	chr13	96133936	96134136	+	-0.180835	2.21627882400516e-13	mutated ERG motif
chr13:96135127_G_A	chr13	96135027	96135227	+	-0.18087	2.21627882400516e-13	mutated ERG motif
chr13:96137405_GA_G	chr13	96137305	96137505	+	-0.180895	2.21627882400516e-13	mutated ERG motif
chr13:96140399_C_T	chr13	96140299	96140499	+	-0.182859	2.21627882400516e-13	mutated ERG motif
chr14:23018665_C_G	chr14	23018565	23018765	+	0.08031999999999995	0.00111150804849955	mutated ERG motif
chr14:23018822_G_A	chr14	23018722	23018922	+	0.06939200000000001	0.00111150804849955	mutated ERG motif
chr14:23169712_C_G	chr14	23169612	23169812	+	0.07589599999999996	0.0408677210157671	mutated ERG motif
chr14:23607246_C_A	chr14	23607146	23607346	+	0.10931700000000001	0.0414530883189806	mutated ERG motif
chr14:25859333_G_A	chr14	25859233	25859433	+	-0.18010299999999999	0.0477556857150709	mutated ERG motif
chr14:34124784_G_A	chr14	34124684	34124884	+	-0.20134100000000002	6.09913242068571e-08	mutated ERG motif
chr14:34125374_A_G	chr14	34125274	34125474	+	-0.13806300000000002	0.000218836925436522	mutated ERG motif
chr14:37134491_T_A	chr14	37134391	37134591	+	0.237123	0.00230003027861656	mutated ERG motif
chr14:42074524_A_G	chr14	42074424	42074624	+	0.21077900000000005	0.0039111579477105396	mutated ERG motif
chr14:58190383_C_G	chr14	58190283	58190483	+	0.093372	0.000144298089303037	mutated ERG motif
chr14:63677883_A_G	chr14	63677783	63677983	+	-0.04011199999999998	0.0147421483335689	mutated ERG motif
chr14:63681322_C_T	chr14	63681222	63681422	+	-0.037076	0.0226659924516205	mutated ERG motif
chr14:65710580_T_G	chr14	65710480	65710680	+	-0.08870900000000004	8.64077033546045e-09	mutated ERG motif
chr14:65711148_T_C	chr14	65711048	65711248	+	-0.06809899999999998	1.66223900974336e-06	mutated ERG motif
chr14:65717871_C_T	chr14	65717771	65717971	+	-0.091381	7.53660375716374e-08	mutated ERG motif
chr14:90602701_G_A	chr14	90602601	90602801	+	0.18796499999999994	4.12108608065328e-12	mutated ERG motif
chr14:91708823_C_T	chr14	91708723	91708923	+	0.12821300000000002	0.0227824794495695	mutated ERG motif
chr14:91789674_G_C	chr14	91789574	91789774	+	0.073936	0.0307124697759187	mutated ERG motif
chr14:95724950_G_A	chr14	95724850	95725050	+	-0.220835	1.07922361880246e-05	mutated ERG motif
chr14:95725004_A_AG	chr14	95724904	95725104	+	-0.128934	0.0233854508810317	mutated ERG motif
chr14:99858739_G_T	chr14	99858639	99858839	+	0.14007999999999998	0.0176915511047997	mutated ERG motif
chr15:101254053_G_A	chr15	101253953	101254153	+	0.14678199999999994	0.007438881230513321	mutated ERG motif
chr15:22923757_GCATTGTGCCCGCCTTCCGGCCCGCCTGGTCCCCGCTTTAGGCTTAGGCA_G	chr15	22923657	22923857	+	-0.145499	0.0422177620528311	mutated ERG motif
chr15:22923771_T_C	chr15	22923671	22923871	+	-0.145499	0.0422177620528311	mutated ERG motif
chr15:25103660_A_G	chr15	25103560	25103760	+	-0.281453	2.32002410166355e-07	mutated ERG motif
chr15:33536932_T_C	chr15	33536832	33537032	+	0.27158800000000005	3.902328703718189e-05	mutated ERG motif
chr15:39006798_T_C	chr15	39006698	39006898	+	-0.27129400000000004	7.31761227518353e-07	mutated ERG motif
chr15:39569380_G_T	chr15	39569280	39569480	+	0.09295699999999996	9.054798853787428e-05	mutated ERG motif
chr15:42225260_G_T	chr15	42225160	42225360	+	0.05562800000000001	0.0005734247909140152	mutated ERG motif
chr15:42226255_C_T	chr15	42226155	42226355	+	0.06135500000000005	1.04452509912494e-05	mutated ERG motif
chr15:42252488_C_T	chr15	42252388	42252588	+	0.04078300000000002	0.0296370900961763	mutated ERG motif
chr15:45924015_T_C	chr15	45923915	45924115	+	0.218567	0.000552593771747444	mutated ERG motif
chr15:52774831_C_T	chr15	52774731	52774931	+	-0.027978999999999976	0.0496599607656534	mutated ERG motif
chr15:52790770_C_T	chr15	52790670	52790870	+	-0.02790100000000001	0.0496599607656534	mutated ERG motif
chr15:57677490_T_C	chr15	57677390	57677590	+	-0.21095500000000003	5.991903419887978e-37	mutated ERG motif
chr15:57681797_G_T	chr15	57681697	57681897	+	-0.04254399999999997	0.0165408491398761	mutated ERG motif
chr15:57768858_T_C	chr15	57768758	57768958	+	0.13391799999999998	0.027636405543243	mutated ERG motif
chr15:57827644_G_A	chr15	57827544	57827744	+	0.14213199999999993	0.013969662744294	mutated ERG motif
chr15:57903749_C_T	chr15	57903649	57903849	+	0.174593	0.00523383114467777	mutated ERG motif
chr15:66947334_C_G	chr15	66947234	66947434	+	-0.06471300000000002	0.0198251068553536	mutated ERG motif
chr15:67010242_T_G	chr15	67010142	67010342	+	-0.06761099999999998	0.00260172420135656	mutated ERG motif
chr15:67012962_T_C	chr15	67012862	67013062	+	-0.06762399999999996	0.00260172420135656	mutated ERG motif
chr15:71679469_C_T	chr15	71679369	71679569	+	-0.16529499999999994	0.0337603573389984	mutated ERG motif
chr15:89455768_C_G	chr15	89455668	89455868	+	0.147524	0.00687044157019415	mutated ERG motif
chr15:90387346_G_A	chr15	90387246	90387446	+	0.08607700000000007	0.0422027162295842	mutated ERG motif
chr15:90717755_C_G	chr15	90717655	90717855	+	0.220877	0.00103054700671734	mutated ERG motif
chr15:90717800_C_G	chr15	90717700	90717900	+	0.22685	0.00103054700671734	mutated ERG motif
chr15:95126014_A_C	chr15	95125914	95126114	+	-0.09537199999999996	0.0408383499546034	mutated ERG motif
chr15:95842877_A_C	chr15	95842777	95842977	+	-0.07093900000000003	0.0012864867949939401	mutated ERG motif
chr15:95844476_A_G	chr15	95844376	95844576	+	-0.08063599999999999	0.0012864867949939401	mutated ERG motif
chr15:96013023_G_A	chr15	96012923	96013123	+	-0.14290199999999995	0.00650599436959933	mutated ERG motif
chr16:16077537_G_A	chr16	16077437	16077637	+	0.038250000000000006	0.0253119606346448	mutated ERG motif
chr16:16085216_G_A	chr16	16085116	16085316	+	0.08064199999999999	0.0009304193781319767	mutated ERG motif
chr16:16098475_G_A	chr16	16098375	16098575	+	-0.13449	4.00439066518299e-16	mutated ERG motif
chr16:16123522_T_A	chr16	16123422	16123622	+	-0.10876500000000001	6.206548777841221e-05	mutated ERG motif
chr16:25269014_G_C	chr16	25268914	25269114	+	-0.118844	0.0330152348406597	mutated ERG motif
chr16:29275842_G_C	chr16	29275742	29275942	+	-0.05337700000000006	0.0321474423224179	mutated ERG motif
chr16:56649831_G_T	chr16	56649731	56649931	+	0.10501400000000004	0.0242293274502183	mutated ERG motif
chr16:66552325_C_T	chr16	66552225	66552425	+	0.16665399999999994	0.0139626689251882	mutated ERG motif
chr16:76378918_A_T	chr16	76378818	76379018	+	0.23230699999999996	0.000660648936184676	mutated ERG motif
chr16:77098579_G_T	chr16	77098479	77098679	+	0.173269	0.00184814679802415	mutated ERG motif
chr16:77112422_T_G	chr16	77112322	77112522	+	0.12516800000000006	0.0311952190677011	mutated ERG motif
chr16:77329464_T_C	chr16	77329364	77329564	+	0.082372	9.46465226184012e-05	mutated ERG motif
chr16:81728192_G_A	chr16	81728092	81728292	+	0.08554399999999995	2.05657687306141e-05	mutated ERG motif
chr16:81730809_G_A	chr16	81730709	81730909	+	0.09490500000000003	8.63298885605689e-06	mutated ERG motif
chr16:83986885_C_G	chr16	83986785	83986985	+	0.10392400000000003	0.0108542340939277	mutated ERG motif
chr16:84209864_G_C	chr16	84209764	84209964	+	-0.12118099999999997	0.0033756051686874198	mutated ERG motif
chr16:84541324_A_G	chr16	84541224	84541424	+	-0.194824	0.000754847157010986	mutated ERG motif
chr16:85436870_A_C	chr16	85436770	85436970	+	-0.148287	0.0300683337329182	mutated ERG motif
chr16:85437219_A_C	chr16	85437119	85437319	+	-0.148293	0.0300683337329182	mutated ERG motif
chr16:85801998_C_G	chr16	85801898	85802098	+	-0.12004399999999997	0.004568156825630779	mutated ERG motif
chr16:87996755_A_G	chr16	87996655	87996855	+	-0.08841199999999999	0.0319887892575435	mutated ERG motif
chr17:15818291_T_C	chr17	15818191	15818391	+	0.211376	0.00664245102611245	mutated ERG motif
chr17:16813508_G_T	chr17	16813408	16813608	+	0.12902199999999994	0.0331811632613113	mutated ERG motif
chr17:18124743_G_A	chr17	18124643	18124843	+	-0.15747499999999998	0.0263587790208438	mutated ERG motif
chr17:260631_C_T	chr17	260531	260731	+	0.21768400000000002	0.0008485236276251152	mutated ERG motif
chr17:39256201_T_C	chr17	39256101	39256301	+	0.14542100000000002	0.047650804825375	mutated ERG motif
chr17:39805118_G_A	chr17	39805018	39805218	+	0.12927600000000006	0.0497699216203092	mutated ERG motif
chr17:44272552_C_T	chr17	44272452	44272652	+	0.251352	2.48368819951475e-10	mutated ERG motif
chr17:44357655_G_C	chr17	44357555	44357755	+	0.17374199999999995	0.0195000769880767	mutated ERG motif
chr17:49518126_A_AT	chr17	49518026	49518226	+	0.2319220000000001	0.0003404138479009641	mutated ERG motif
chr17:55970401_G_A	chr17	55970301	55970501	+	-0.10297399999999997	0.046276887777227986	mutated ERG motif
chr17:5728909_T_G	chr17	5728809	5729009	+	-0.06032399999999999	0.00170084863103779	mutated ERG motif
chr17:5730117_T_C	chr17	5730017	5730217	+	0.09925399999999997	6.460424865216759e-07	mutated ERG motif
chr17:6092546_C_A	chr17	6092446	6092646	+	0.194372	3.69602589924352e-05	mutated ERG motif
chr17:62404441_T_C	chr17	62404341	62404541	+	0.07008400000000004	5.59981988116372e-06	mutated ERG motif
chr17:62409586_C_G	chr17	62409486	62409686	+	0.07275600000000004	5.59981988116372e-06	mutated ERG motif
chr17:64271478_G_A	chr17	64271378	64271578	+	0.11090100000000004	0.00220702256250936	mutated ERG motif
chr17:64271989_A_C	chr17	64271889	64272089	+	-0.08269099999999996	0.0167564456645056	mutated ERG motif
chr17:6690829_G_A	chr17	6690729	6690929	+	-0.175081	0.0143305816496641	mutated ERG motif
chr17:6691542_A_G	chr17	6691442	6691642	+	-0.14165999999999998	0.0189702639608086	mutated ERG motif
chr17:66951094_T_C	chr17	66950994	66951194	+	0.14713900000000002	0.00958220706868635	mutated ERG motif
chr17:66951984_A_G	chr17	66951884	66952084	+	0.1533770000000001	0.0246473530337504	mutated ERG motif
chr17:70980366_G_T	chr17	70980266	70980466	+	-0.094453	0.0178065408927296	mutated ERG motif
chr17:73775585_G_A	chr17	73775485	73775685	+	0.191213	8.58122691195018e-05	mutated ERG motif
chr17:75388200_C_T	chr17	75388100	75388300	+	0.06356000000000006	0.00175153029819438	mutated ERG motif
chr17:7760397_G_A	chr17	7760297	7760497	+	0.12519399999999992	0.0189118941082479	mutated ERG motif
chr17:78865127_C_T	chr17	78865027	78865227	+	0.165257	0.000986666998045361	mutated ERG motif
chr17:79455402_CCCCGGGGCCTCCGGGATGTTCCGGGGCCGAGTTGTGCCTGTTGCCGTTTCCGGCG_C	chr17	79455302	79455502	+	-0.128863	0.0038251181389336	mutated ERG motif
chr18:24371738_A_C	chr18	24371638	24371838	+	-0.231415	0.000231603211130456	mutated ERG motif
chr18:51762443_A_G	chr18	51762343	51762543	+	-0.194904	4.5555231011956e-05	mutated ERG motif
chr18:51915281_A_C	chr18	51915181	51915381	+	-0.296318	3.33103221231542e-16	mutated ERG motif
chr18:527110_A_G	chr18	527010	527210	+	0.06471300000000002	0.0499749779649091	mutated ERG motif
chr18:55336081_A_G	chr18	55335981	55336181	+	-0.05055500000000002	0.009539023583438359	mutated ERG motif
chr18:55338423_C_T	chr18	55338323	55338523	+	0.050880000000000036	0.0042877540636324	mutated ERG motif
chr18:57550550_C_T	chr18	57550450	57550650	+	0.051431	0.0209832433874569	mutated ERG motif
chr18:61779745_A_C	chr18	61779645	61779845	+	0.21168999999999996	0.0195365409676512	mutated ERG motif
chr18:65583619_G_T	chr18	65583519	65583719	+	-0.14947500000000002	0.00524222043081243	mutated ERG motif
chr18:804014_T_C	chr18	803914	804114	+	0.072237	0.0376290231348373	mutated ERG motif
chr18:8798374_G_A	chr18	8798274	8798474	+	-0.11036399999999996	0.0031431014624291	mutated ERG motif
chr18:8799294_G_A	chr18	8799194	8799394	+	-0.15407900000000002	0.000148404779265881	mutated ERG motif
chr19:1015909_A_G	chr19	1015809	1016009	+	0.13203900000000002	0.0123868255458328	mutated ERG motif
chr19:11380524_T_C	chr19	11380424	11380624	+	-0.047092000000000016	0.0074054302503881704	mutated ERG motif
chr19:15235932_G_A	chr19	15235832	15236032	+	0.08752599999999999	0.039068910645112	mutated ERG motif
chr19:16184809_G_C	chr19	16184709	16184909	+	0.1337649999999999	4.4787009667259295e-07	mutated ERG motif
chr19:16190701_G_C	chr19	16190601	16190801	+	0.12025699999999995	1.48469598914212e-06	mutated ERG motif
chr19:28914464_T_A	chr19	28914364	28914564	+	-0.28439699999999996	8.53055111686584e-09	mutated ERG motif
chr19:28915606_T_C	chr19	28915506	28915706	+	0.326363	6.7229006226845594e-12	mutated ERG motif
chr19:35800662_G_T	chr19	35800562	35800762	+	-0.308392	0.000774921875510586	mutated ERG motif
chr19:39143289_G_A	chr19	39143189	39143389	+	0.05609799999999998	0.0243581255757027	mutated ERG motif
chr19:43710337_A_T	chr19	43710237	43710437	+	-0.249885	0.000815253747281621	mutated ERG motif
chr19:44258702_G_T	chr19	44258602	44258802	+	0.06020100000000006	0.00927870930680026	mutated ERG motif
chr19:45195082_C_A	chr19	45194982	45195182	+	-0.17895999999999998	0.00955450995142263	mutated ERG motif
chr19:45220440_G_A	chr19	45220340	45220540	+	-0.08772600000000003	0.0324748708130905	mutated ERG motif
chr19:4565227_G_A	chr19	4565127	4565327	+	-0.071905	0.0297294708543045	mutated ERG motif
chr19:4572449_T_C	chr19	4572349	4572549	+	0.10219200000000006	0.0190543992490568	mutated ERG motif
chr19:46792652_A_G	chr19	46792552	46792752	+	0.17129099999999994	0.00387881555259921	mutated ERG motif
chr19:46793549_A_G	chr19	46793449	46793649	+	0.15638699999999994	0.00387881555259921	mutated ERG motif
chr19:48713615_G_A	chr19	48713515	48713715	+	-0.14308099999999999	2.45070871227558e-06	mutated ERG motif
chr19:52078355_C_A	chr19	52078255	52078455	+	0.05773400000000006	0.00441445163881521	mutated ERG motif
chr19:54960702_C_A	chr19	54960602	54960802	+	-0.08821000000000001	0.0366998537686574	mutated ERG motif
chr19:54960981_T_C	chr19	54960881	54961081	+	-0.09429099999999996	0.0240249022426766	mutated ERG motif
chr1:12046089_G_A	chr1	12045989	12046189	+	-0.180256	0.0306179499787812	mutated ERG motif
chr1:15502539_A_G	chr1	15502439	15502639	+	0.08439399999999997	0.0283793698478845	mutated ERG motif
chr1:158980534_C_T	chr1	158980434	158980634	+	0.08526800000000001	0.00222594258274899	mutated ERG motif
chr1:16593804_G_C	chr1	16593704	16593904	+	0.08186199999999999	0.0478796110656921	mutated ERG motif
chr1:17308158_C_T	chr1	17308058	17308258	+	-0.260184	4.02646940158683e-06	mutated ERG motif
chr1:183810984_G_A	chr1	183810884	183811084	+	-0.07560900000000004	0.0217203168534355	mutated ERG motif
chr1:184231056_A_G	chr1	184230956	184231156	+	0.17146000000000006	1.0045075136719304e-09	mutated ERG motif
chr1:198188749_G_A	chr1	198188649	198188849	+	0.13165000000000004	0.000151939245551144	mutated ERG motif
chr1:208396537_A_AACTTTAGAT	chr1	208396437	208396637	+	0.08775900000000003	0.00707955499879045	mutated ERG motif
chr1:210003388_A_C	chr1	210003288	210003488	+	0.080924	0.00014793715637324	mutated ERG motif
chr1:211685489_C_T	chr1	211685389	211685589	+	-0.229642	0.007789935744548109	mutated ERG motif
chr1:211812068_C_T	chr1	211811968	211812168	+	0.1743	0.00044070760529676506	mutated ERG motif
chr1:22232477_C_T	chr1	22232377	22232577	+	0.09658999999999997	9.301009890611748e-07	mutated ERG motif
chr1:22239774_T_C	chr1	22239674	22239874	+	-0.090267	1.35642154260641e-05	mutated ERG motif
chr1:22249589_A_G	chr1	22249489	22249689	+	0.09591899999999998	3.7530881210639e-06	mutated ERG motif
chr1:22251260_C_T	chr1	22251160	22251360	+	0.11070500000000004	6.44253578479293e-08	mutated ERG motif
chr1:223930996_C_T	chr1	223930896	223931096	+	0.15906399999999998	3.54575403592848e-18	mutated ERG motif
chr1:2246287_G_C	chr1	2246187	2246387	+	-0.11143400000000003	0.0361087503297878	mutated ERG motif
chr1:234451146_A_G	chr1	234451046	234451246	+	0.179921	0.0295654089189227	mutated ERG motif
chr1:244487967_C_G	chr1	244487867	244488067	+	0.12415900000000002	8.137328511113871e-05	mutated ERG motif
chr1:244508697_A_G	chr1	244508597	244508797	+	-0.04598000000000002	0.0210969347177308	mutated ERG motif
chr1:246039192_C_T	chr1	246039092	246039292	+	-0.22576	2.92611350597093e-07	mutated ERG motif
chr1:31230099_G_A	chr1	31229999	31230199	+	0.2064050000000001	9.47629093312888e-09	mutated ERG motif
chr1:39492462_C_T	chr1	39492362	39492562	+	-0.185504	4.934748806751049e-06	mutated ERG motif
chr1:55742210_A_G	chr1	55742110	55742310	+	0.276077	2.54495644256461e-07	mutated ERG motif
chr1:55922799_G_A	chr1	55922699	55922899	+	-0.12494299999999996	0.0121673775055474	mutated ERG motif
chr1:59306031_A_G	chr1	59305931	59306131	+	0.22206400000000004	9.9031328881626e-05	mutated ERG motif
chr1:60060076_C_T	chr1	60059976	60060176	+	0.197758	0.00020255255040639	mutated ERG motif
chr1:66955878_C_T	chr1	66955778	66955978	+	0.18120400000000006	3.54447539811854e-05	mutated ERG motif
chr1:66956685_G_A	chr1	66956585	66956785	+	0.22841799999999998	7.33375457754237e-10	mutated ERG motif
chr1:66957705_G_A	chr1	66957605	66957805	+	0.213151	1.44286695441588e-06	mutated ERG motif
chr1:68144337_T_C	chr1	68144237	68144437	+	-0.13475700000000002	0.0109607304458655	mutated ERG motif
chr1:68148353_T_C	chr1	68148253	68148453	+	0.084816	0.0123222404941463	mutated ERG motif
chr1:80295334_T_C	chr1	80295234	80295434	+	0.153999	0.0265167783238836	mutated ERG motif
chr1:86860894_T_C	chr1	86860794	86860994	+	0.10963100000000003	0.0264761642527894	mutated ERG motif
chr1:91996398_AT_A	chr1	91996298	91996498	+	0.133455	0.00452577561483729	mutated ERG motif
chr1:92166931_C_T	chr1	92166831	92167031	+	-0.20280499999999999	0.0071463029778598905	mutated ERG motif
chr1:94486355_A_G	chr1	94486255	94486455	+	0.15817000000000006	0.007632580833009609	mutated ERG motif
chr20:19958000_G_A	chr20	19957900	19958100	+	-0.096173	0.0112812617129718	mutated ERG motif
chr20:19958303_T_C	chr20	19958203	19958403	+	0.11672899999999994	0.0005984239039106008	mutated ERG motif
chr20:3597171_A_G	chr20	3597071	3597271	+	-0.208445	0.0386887847544647	mutated ERG motif
chr20:39275470_G_A	chr20	39275370	39275570	+	0.12326899999999995	0.0161580495538221	mutated ERG motif
chr20:39773239_G_A	chr20	39773139	39773339	+	-0.11063099999999998	0.0280977855678655	mutated ERG motif
chr20:4100615_A_G	chr20	4100515	4100715	+	-0.237632	0.00044020685114706603	mutated ERG motif
chr20:48196962_G_A	chr20	48196862	48197062	+	0.166956	3.08133742371144e-08	mutated ERG motif
chr20:48205494_A_G	chr20	48205394	48205594	+	0.174887	3.74651728062085e-08	mutated ERG motif
chr20:48211250_C_G	chr20	48211150	48211350	+	0.16360699999999995	6.414659146942809e-08	mutated ERG motif
chr20:48429866_G_C	chr20	48429766	48429966	+	-0.05336199999999997	0.008869283252539209	mutated ERG motif
chr20:52205944_A_G	chr20	52205844	52206044	+	-0.13984200000000002	0.0262494306439973	mutated ERG motif
chr20:52556562_G_A	chr20	52556462	52556662	+	-0.15669299999999994	0.00238815813068886	mutated ERG motif
chr20:7638973_ACAAT_A	chr20	7638873	7639073	+	0.199754	0.0454830971185736	mutated ERG motif
chr21:25419023_G_T	chr21	25418923	25419123	+	0.24515299999999995	3.66387954490302e-06	mutated ERG motif
chr21:30113901_G_T	chr21	30113801	30114001	+	0.22318600000000002	7.14039565918541e-09	mutated ERG motif
chr21:30118294_C_T	chr21	30118194	30118394	+	0.170408	2.82161165001187e-05	mutated ERG motif
chr21:35936674_A_G	chr21	35936574	35936774	+	0.19543999999999995	0.0284898140988968	mutated ERG motif
chr21:35936693_C_A	chr21	35936593	35936793	+	0.19562	0.0284898140988968	mutated ERG motif
chr21:40222039_G_A	chr21	40221939	40222139	+	0.320649	4.2638042387669293e-10	mutated ERG motif
chr21:40224953_G_A	chr21	40224853	40225053	+	0.3206549999999999	4.2638042387669293e-10	mutated ERG motif
chr21:40342888_C_T	chr21	40342788	40342988	+	0.11648299999999999	0.0410563366785812	mutated ERG motif
chr21:40371571_C_A	chr21	40371471	40371671	+	0.08262499999999995	0.0138793461348086	mutated ERG motif
chr21:40376636_C_T	chr21	40376536	40376736	+	0.08358100000000003	0.0452769748539817	mutated ERG motif
chr21:40533164_T_C	chr21	40533064	40533264	+	0.244112	0.000336657136476607	mutated ERG motif
chr22:22590920_A_T	chr22	22590820	22591020	+	-0.163487	0.00240351715757978	mutated ERG motif
chr22:23619440_C_G	chr22	23619340	23619540	+	0.22172799999999995	3.35755491137967e-06	mutated ERG motif
chr22:27903116_G_T	chr22	27903016	27903216	+	-0.10012	3.72272288016263e-06	mutated ERG motif
chr22:36590853_C_T	chr22	36590753	36590953	+	0.15153800000000006	0.00228708743744772	mutated ERG motif
chr22:38570927_C_G	chr22	38570827	38571027	+	-0.11186	2.33626024518776e-05	mutated ERG motif
chr22:38573629_T_C	chr22	38573529	38573729	+	-0.111578	2.33626024518776e-05	mutated ERG motif
chr22:46897424_A_G	chr22	46897324	46897524	+	-0.259153	0.000111150479967574	mutated ERG motif
chr2:102626469_A_G	chr2	102626369	102626569	+	-0.183542	0.00930589931538974	mutated ERG motif
chr2:108251396_C_A	chr2	108251296	108251496	+	0.19916199999999995	0.00571718111396063	mutated ERG motif
chr2:113836944_G_T	chr2	113836844	113837044	+	-0.165311	0.00486893992305456	mutated ERG motif
chr2:124936970_T_C	chr2	124936870	124937070	+	0.17089700000000008	5.16285191918198e-05	mutated ERG motif
chr2:137647878_T_C	chr2	137647778	137647978	+	-0.233672	8.11026998873834e-06	mutated ERG motif
chr2:137649982_T_A	chr2	137649882	137650082	+	0.203611	4.26674148939471e-05	mutated ERG motif
chr2:159994048_G_A	chr2	159993948	159994148	+	0.11417299999999996	0.0111707170310125	mutated ERG motif
chr2:160891009_T_C	chr2	160890909	160891109	+	0.219374	5.673265703178779e-13	mutated ERG motif
chr2:160912652_T_C	chr2	160912552	160912752	+	0.24573199999999995	2.76042192699284e-09	mutated ERG motif
chr2:165419009_T_C	chr2	165418909	165419109	+	0.056852000000000014	0.0158289031664493	mutated ERG motif
chr2:166914465_C_T	chr2	166914365	166914565	+	-0.187776	0.00048745955299323083	mutated ERG motif
chr2:173104712_G_T	chr2	173104612	173104812	+	-0.196932	1.70711802041861e-10	mutated ERG motif
chr2:173107281_G_A	chr2	173107181	173107381	+	-0.18570699999999998	1.70711802041861e-10	mutated ERG motif
chr2:178499240_C_G	chr2	178499140	178499340	+	0.264972	0.000175267706196022	mutated ERG motif
chr2:181939078_T_G	chr2	181938978	181939178	+	-0.12496999999999996	0.000601069611173485	mutated ERG motif
chr2:188185516_T_G	chr2	188185416	188185616	+	-0.181593	0.00236853051314692	mutated ERG motif
chr2:192250250_G_T	chr2	192250150	192250350	+	0.15842299999999998	0.0188332228344123	mutated ERG motif
chr2:205536304_C_T	chr2	205536204	205536404	+	-0.102089	0.0145971886143775	mutated ERG motif
chr2:207023620_A_G	chr2	207023520	207023720	+	-0.102495	0.0242356454468659	mutated ERG motif
chr2:20795945_C_G	chr2	20795845	20796045	+	0.12574799999999994	0.00935335710632247	mutated ERG motif
chr2:207985464_C_A	chr2	207985364	207985564	+	-0.111614	0.00227845171795076	mutated ERG motif
chr2:20815964_G_C	chr2	20815864	20816064	+	0.053702000000000034	0.0265223253833044	mutated ERG motif
chr2:20816952_G_A	chr2	20816852	20817052	+	0.05353399999999997	0.0265223253833044	mutated ERG motif
chr2:209130292_A_G	chr2	209130192	209130392	+	0.09399399999999992	0.0193034053023595	mutated ERG motif
chr2:220311039_C_A	chr2	220310939	220311139	+	-0.18200900000000006	0.017768032572775	mutated ERG motif
chr2:228440935_T_TC	chr2	228440835	228441035	+	-0.222262	0.00417301344726745	mutated ERG motif
chr2:233186327_C_G	chr2	233186227	233186427	+	0.15063100000000007	0.00869491702267973	mutated ERG motif
chr2:235600705_A_G	chr2	235600605	235600805	+	0.11103200000000002	0.0373726303742748	mutated ERG motif
chr2:235890728_C_T	chr2	235890628	235890828	+	0.17291899999999993	6.715039350473e-06	mutated ERG motif
chr2:237848399_T_G	chr2	237848299	237848499	+	-0.09431499999999997	0.0230318687078195	mutated ERG motif
chr2:238166147_G_A	chr2	238166047	238166247	+	-0.20820700000000006	0.00894202798698548	mutated ERG motif
chr2:238509907_T_C	chr2	238509807	238510007	+	0.197515	0.0023597645208049104	mutated ERG motif
chr2:36629287_A_G	chr2	36629187	36629387	+	0.05504399999999998	0.004970490525455389	mutated ERG motif
chr2:36783215_C_T	chr2	36783115	36783315	+	0.04460699999999995	0.0209481560524086	mutated ERG motif
chr2:37409384_G_A	chr2	37409284	37409484	+	0.314153	4.9630292962452105e-14	mutated ERG motif
chr2:37870508_C_G	chr2	37870408	37870608	+	0.046991000000000005	0.0334915240734499	mutated ERG motif
chr2:37870937_C_G	chr2	37870837	37871037	+	0.04599799999999998	0.0347970238563865	mutated ERG motif
chr2:37911438_G_A	chr2	37911338	37911538	+	0.17620200000000008	0.0426467892997227	mutated ERG motif
chr2:38306415_C_G	chr2	38306315	38306515	+	0.22044200000000005	4.4527317518582e-05	mutated ERG motif
chr2:43143203_C_A	chr2	43143103	43143303	+	0.030139999999999945	0.0029830532345339893	mutated ERG motif
chr2:43150215_G_C	chr2	43150115	43150315	+	-0.028712000000000012	0.00613112007420389	mutated ERG motif
chr2:43315487_T_C	chr2	43315387	43315587	+	0.08866400000000008	0.0321243481974405	mutated ERG motif
chr2:45503098_G_C	chr2	45502998	45503198	+	0.12767099999999998	0.00015822442565973402	mutated ERG motif
chr2:46192017_T_G	chr2	46191917	46192117	+	0.06367	0.0432194704945703	mutated ERG motif
chr2:86441085_G_T	chr2	86440985	86441185	+	-0.241379	0.000401846206716773	mutated ERG motif
chr2:9393303_C_T	chr2	9393203	9393403	+	0.06429600000000002	0.0371351860068868	mutated ERG motif
chr3:104628866_A_C	chr3	104628766	104628966	+	-0.260072	3.1079447382976697e-13	mutated ERG motif
chr3:107678877_G_A	chr3	107678777	107678977	+	0.211125	1.24202873044641e-06	mutated ERG motif
chr3:107688718_T_C	chr3	107688618	107688818	+	-0.14225900000000002	0.017254639971302	mutated ERG motif
chr3:110247192_T_C	chr3	110247092	110247292	+	0.19201899999999994	8.77523402688103e-05	mutated ERG motif
chr3:111625687_C_G	chr3	111625587	111625787	+	-0.12753200000000006	0.0243005049347585	mutated ERG motif
chr3:112022141_A_G	chr3	112022041	112022241	+	-0.199817	0.0007486022303556482	mutated ERG motif
chr3:122794677_G_GGAATCTGT	chr3	122794577	122794777	+	0.11234000000000001	0.0429303586905613	mutated ERG motif
chr3:122797040_A_G	chr3	122796940	122797140	+	0.11207200000000006	0.0429303586905613	mutated ERG motif
chr3:124606753_T_A	chr3	124606653	124606853	+	-0.11407399999999995	0.00203869402034646	mutated ERG motif
chr3:127795972_G_A	chr3	127795872	127796072	+	0.12053199999999994	0.00283628262438006	mutated ERG motif
chr3:133020705_C_A	chr3	133020605	133020805	+	-0.146963	0.00615365828723592	mutated ERG motif
chr3:145871534_A_G	chr3	145871434	145871634	+	0.09412900000000002	0.0004233513576953	mutated ERG motif
chr3:147032213_G_GA	chr3	147032113	147032313	+	0.2537229999999999	0.000776116718554683	mutated ERG motif
chr3:147054867_T_C	chr3	147054767	147054967	+	0.205888	6.06962643584222e-08	mutated ERG motif
chr3:149225582_C_A	chr3	149225482	149225682	+	-0.08858299999999998	0.00424136232667202	mutated ERG motif
chr3:151484414_G_C	chr3	151484314	151484514	+	0.11503900000000002	0.00789317843178505	mutated ERG motif
chr3:157008596_G_A	chr3	157008496	157008696	+	0.12358900000000005	0.000170966113313475	mutated ERG motif
chr3:157088042_G_C	chr3	157087942	157088142	+	0.08078599999999991	0.0156955324121648	mutated ERG motif
chr3:157184238_G_A	chr3	157184138	157184338	+	0.06461700000000004	0.049906798241155986	mutated ERG motif
chr3:158442328_G_A	chr3	158442228	158442428	+	0.11997500000000005	0.0241707222478585	mutated ERG motif
chr3:16192482_T_C	chr3	16192382	16192582	+	0.09180699999999996	0.041924210539118	mutated ERG motif
chr3:168822959_T_A	chr3	168822859	168823059	+	0.06829399999999998	2.07139009404288e-05	mutated ERG motif
chr3:168831430_G_C	chr3	168831330	168831530	+	-0.072604	2.07139009404288e-05	mutated ERG motif
chr3:182452931_T_C	chr3	182452831	182453031	+	0.10789799999999994	0.0130974189135427	mutated ERG motif
chr3:182453645_C_T	chr3	182453545	182453745	+	-0.30933499999999997	7.44087706554026e-08	mutated ERG motif
chr3:183167515_C_G	chr3	183167415	183167615	+	-0.143376	0.0008318541145926361	mutated ERG motif
chr3:191887870_G_A	chr3	191887770	191887970	+	-0.207547	0.0219470596491417	mutated ERG motif
chr3:193178508_C_T	chr3	193178408	193178608	+	0.17144700000000002	0.000317972435461918	mutated ERG motif
chr3:194308889_A_G	chr3	194308789	194308989	+	0.205226	0.00195661880409954	mutated ERG motif
chr3:194865992_G_GCCTTT	chr3	194865892	194866092	+	0.08870100000000003	0.000616731706206046	mutated ERG motif
chr3:194866377_T_A	chr3	194866277	194866477	+	0.09967099999999997	0.00022382024732159	mutated ERG motif
chr3:194870655_C_T	chr3	194870555	194870755	+	-0.055929000000000006	0.00894025178423594	mutated ERG motif
chr3:194871405_G_A	chr3	194871305	194871505	+	0.12943800000000005	1.19645017925326e-05	mutated ERG motif
chr3:194875140_A_G	chr3	194875040	194875240	+	0.13024799999999992	1.11808908235289e-05	mutated ERG motif
chr3:197121368_T_C	chr3	197121268	197121468	+	0.14590699999999998	0.0310287865242395	mutated ERG motif
chr3:197212490_C_T	chr3	197212390	197212590	+	0.06681300000000001	0.0131555328564986	mutated ERG motif
chr3:197214763_A_G	chr3	197214663	197214863	+	0.08639700000000006	0.00336021830936843	mutated ERG motif
chr3:197215230_T_C	chr3	197215130	197215330	+	0.08755600000000008	5.14674484497025e-05	mutated ERG motif
chr3:197218949_A_G	chr3	197218849	197219049	+	-0.07606000000000003	0.0291621912363478	mutated ERG motif
chr3:21961514_G_A	chr3	21961414	21961614	+	-0.183192	0.0145658215873525	mutated ERG motif
chr3:23141408_A_G	chr3	23141308	23141508	+	0.11300600000000005	0.0129056793239627	mutated ERG motif
chr3:25499525_G_A	chr3	25499425	25499625	+	0.191595	0.00102710060113346	mutated ERG motif
chr3:37187398_C_T	chr3	37187298	37187498	+	-0.18709000000000006	0.0254044099255974	mutated ERG motif
chr3:42002761_A_G	chr3	42002661	42002861	+	0.08591599999999999	0.0445739664964898	mutated ERG motif
chr3:42224343_G_T	chr3	42224243	42224443	+	-0.253895	4.2846681538911705e-07	mutated ERG motif
chr3:57945603_A_G	chr3	57945503	57945703	+	-0.154184	0.00887299187222957	mutated ERG motif
chr3:67661553_T_C	chr3	67661453	67661653	+	-0.121788	0.000818288781374678	mutated ERG motif
chr3:72397284_C_A	chr3	72397184	72397384	+	-0.194044	0.0124827189434652	mutated ERG motif
chr3:73046544_T_C	chr3	73046444	73046644	+	0.152142	0.0158984352920781	mutated ERG motif
chr3:7914949_C_T	chr3	7914849	7915049	+	0.10418800000000006	0.00162502030066864	mutated ERG motif
chr3:87399504_A_G	chr3	87399404	87399604	+	0.26508999999999994	2.9160555667405e-06	mutated ERG motif
chr3:96073585_C_T	chr3	96073485	96073685	+	-0.14643599999999998	0.0401349053574933	mutated ERG motif
chr3:98494660_C_G	chr3	98494560	98494760	+	0.149042	1.0011665611689e-15	mutated ERG motif
chr3:98500088_T_C	chr3	98499988	98500188	+	0.14829899999999996	3.12787164793542e-16	mutated ERG motif
chr3:99294920_C_T	chr3	99294820	99295020	+	0.164169	0.000563765519585066	mutated ERG motif
chr3:99296868_G_A	chr3	99296768	99296968	+	-0.105404	0.0111501121185583	mutated ERG motif
chr3:99724792_G_A	chr3	99724692	99724892	+	0.12705100000000005	9.7530716538172e-05	mutated ERG motif
chr4:10124330_G_C	chr4	10124230	10124430	+	0.12856099999999993	8.23836532772641e-05	mutated ERG motif
chr4:102109064_C_T	chr4	102108964	102109164	+	-0.12075000000000002	0.0158111170546452	mutated ERG motif
chr4:107944395_G_A	chr4	107944295	107944495	+	0.05128100000000002	0.019344630396763	mutated ERG motif
chr4:113194675_G_A	chr4	113194575	113194775	+	-0.264981	1.32811447848399e-08	mutated ERG motif
chr4:120017677_C_T	chr4	120017577	120017777	+	-0.19650300000000004	0.0158084021935714	mutated ERG motif
chr4:141023127_CAGA_C	chr4	141023027	141023227	+	-0.07413999999999997	0.04493276798709	mutated ERG motif
chr4:149752356_T_C	chr4	149752256	149752456	+	0.04982200000000003	0.0321433656368278	mutated ERG motif
chr4:15699005_A_G	chr4	15698905	15699105	+	-0.09586599999999999	0.00400945716448518	mutated ERG motif
chr4:160101299_G_A	chr4	160101199	160101399	+	-0.171178	0.00995145181066334	mutated ERG motif
chr4:169307428_T_C	chr4	169307328	169307528	+	0.16414399999999996	6.333340668122501e-09	mutated ERG motif
chr4:169687725_T_G	chr4	169687625	169687825	+	-0.14340799999999998	0.0127187752268334	mutated ERG motif
chr4:177804916_C_T	chr4	177804816	177805016	+	0.316742	2.7873521563527998e-18	mutated ERG motif
chr4:177806122_T_C	chr4	177806022	177806222	+	0.31681000000000004	2.7873521563527998e-18	mutated ERG motif
chr4:177842650_G_A	chr4	177842550	177842750	+	0.12127500000000002	0.0289075073607575	mutated ERG motif
chr4:184355996_T_G	chr4	184355896	184356096	+	0.14460299999999993	0.0371861584081427	mutated ERG motif
chr4:184359388_G_A	chr4	184359288	184359488	+	0.10652899999999997	0.0266660026909171	mutated ERG motif
chr4:184360645_G_A	chr4	184360545	184360745	+	0.2289220000000001	6.40534725123696e-06	mutated ERG motif
chr4:18541134_G_A	chr4	18541034	18541234	+	0.08838299999999999	0.0455526941180432	mutated ERG motif
chr4:186177083_C_T	chr4	186176983	186177183	+	0.31693400000000005	3.33884898186796e-08	mutated ERG motif
chr4:2415401_T_C	chr4	2415301	2415501	+	-0.091877	0.0110609190187454	mutated ERG motif
chr4:24641861_A_G	chr4	24641761	24641961	+	-0.185251	2.9126197730254603e-05	mutated ERG motif
chr4:25003442_GA_G	chr4	25003342	25003542	+	0.12421700000000002	0.0178518309916973	mutated ERG motif
chr4:26050686_G_GA	chr4	26050586	26050786	+	0.2021310000000001	0.00018749199284623402	mutated ERG motif
chr4:30431092_T_C	chr4	30430992	30431192	+	0.158211	0.000575393528851408	mutated ERG motif
chr4:30431573_C_T	chr4	30431473	30431673	+	-0.14213899999999996	0.00212458651630888	mutated ERG motif
chr4:32264258_A_AG	chr4	32264158	32264358	+	0.210201	0.00663955097901099	mutated ERG motif
chr4:39070416_CAG_C	chr4	39070316	39070516	+	-0.249706	0.00109382540121095	mutated ERG motif
chr4:41199563_C_G	chr4	41199463	41199663	+	-0.04218299999999997	0.00270105168156484	mutated ERG motif
chr4:41201819_G_A	chr4	41201719	41201919	+	-0.04219600000000001	0.00270105168156484	mutated ERG motif
chr4:41760431_G_T	chr4	41760331	41760531	+	0.172744	0.008029390477213641	mutated ERG motif
chr4:41760958_T_C	chr4	41760858	41761058	+	0.17271400000000006	0.008029390477213641	mutated ERG motif
chr4:4258887_C_T	chr4	4258787	4258987	+	-0.29594299999999996	8.724403351169729e-07	mutated ERG motif
chr4:4259085_T_G	chr4	4258985	4259185	+	0.32104999999999995	1.94662522005002e-09	mutated ERG motif
chr4:5022616_G_A	chr4	5022516	5022716	+	0.18363699999999994	4.62528770533417e-05	mutated ERG motif
chr4:55803741_T_C	chr4	55803641	55803841	+	0.145899	0.009633215489210459	mutated ERG motif
chr4:56043221_G_A	chr4	56043121	56043321	+	-0.191785	3.08601396553411e-07	mutated ERG motif
chr4:5746620_T_C	chr4	5746520	5746720	+	-0.04124300000000003	0.0241391067050436	mutated ERG motif
chr4:5751066_C_CG	chr4	5750966	5751166	+	-0.17199799999999998	2.66951026943382e-16	mutated ERG motif
chr4:57520070_C_T	chr4	57519970	57520170	+	-0.13376	0.0193507040643562	mutated ERG motif
chr4:57522650_GCCGGCCT_G	chr4	57522550	57522750	+	-0.242944	6.19641813761092e-06	mutated ERG motif
chr4:57944831_C_T	chr4	57944731	57944931	+	0.05684299999999998	0.00342829757663755	mutated ERG motif
chr4:57950752_C_T	chr4	57950652	57950852	+	0.052397000000000034	0.00342829757663755	mutated ERG motif
chr4:57951527_C_T	chr4	57951427	57951627	+	-0.06491000000000002	3.91579220302375e-05	mutated ERG motif
chr4:7845067_G_A	chr4	7844967	7845167	+	-0.09329899999999997	0.043484403601121	mutated ERG motif
chr4:79438932_A_C	chr4	79438832	79439032	+	-0.113664	0.0189111021841	mutated ERG motif
chr4:79439806_T_C	chr4	79439706	79439906	+	-0.11364600000000002	0.0189111021841	mutated ERG motif
chr4:79440248_C_A	chr4	79440148	79440348	+	-0.113581	0.0189111021841	mutated ERG motif
chr4:83901562_G_A	chr4	83901462	83901662	+	-0.15653499999999998	0.0212187485899297	mutated ERG motif
chr4:84437684_G_A	chr4	84437584	84437784	+	-0.151519	0.0251231324344585	mutated ERG motif
chr4:87860514_T_G	chr4	87860414	87860614	+	-0.14372199999999996	0.0398342469572248	mutated ERG motif
chr4:90408690_C_A	chr4	90408590	90408790	+	-0.18077600000000005	3.9440117716025e-06	mutated ERG motif
chr4:96681549_T_C	chr4	96681449	96681649	+	-0.13845200000000002	0.0281190886608729	mutated ERG motif
chr4:97596949_A_G	chr4	97596849	97597049	+	-0.202929	0.0018684831769702106	mutated ERG motif
chr4:99443585_G_A	chr4	99443485	99443685	+	0.12002200000000007	0.00484459260259864	mutated ERG motif
chr5:106837754_G_A	chr5	106837654	106837854	+	0.11731300000000001	0.0020921103499894397	mutated ERG motif
chr5:108753139_C_G	chr5	108753039	108753239	+	-0.243758	8.44781936669547e-05	mutated ERG motif
chr5:110187054_G_A	chr5	110186954	110187154	+	-0.11701100000000005	0.0412072512914308	mutated ERG motif
chr5:114700699_G_A	chr5	114700599	114700799	+	0.11188399999999997	0.00421912088367093	mutated ERG motif
chr5:114702118_C_CT	chr5	114702018	114702218	+	0.22868199999999994	2.59425068452485e-06	mutated ERG motif
chr5:132300201_C_T	chr5	132300101	132300301	+	0.12724899999999995	0.0272666025674965	mutated ERG motif
chr5:133089667_A_G	chr5	133089567	133089767	+	0.279223	3.79806554859075e-07	mutated ERG motif
chr5:135329749_C_T	chr5	135329649	135329849	+	-0.17209600000000005	0.00156234969729494	mutated ERG motif
chr5:138355963_G_T	chr5	138355863	138356063	+	0.17623299999999995	0.0416593984723698	mutated ERG motif
chr5:141216764_T_G	chr5	141216664	141216864	+	0.14529199999999998	4.68246600766036e-05	mutated ERG motif
chr5:142553783_G_A	chr5	142553683	142553883	+	0.14078500000000005	0.0466927397817447	mutated ERG motif
chr5:143075183_C_T	chr5	143075083	143075283	+	0.1897439999999999	0.012641359600641002	mutated ERG motif
chr5:151051760_A_G	chr5	151051660	151051860	+	-0.08354399999999995	0.0428597058486074	mutated ERG motif
chr5:1559341_T_C	chr5	1559241	1559441	+	0.3594209999999999	3.25271735435866e-11	mutated ERG motif
chr5:169403819_G_A	chr5	169403719	169403919	+	-0.05088999999999999	0.0188070803365455	mutated ERG motif
chr5:171788536_C_T	chr5	171788436	171788636	+	0.22623000000000004	0.00067086601937337	mutated ERG motif
chr5:172337327_T_G	chr5	172337227	172337427	+	0.09284199999999998	0.0391735376761745	mutated ERG motif
chr5:180229013_A_C	chr5	180228913	180229113	+	0.104703	0.00274584121383847	mutated ERG motif
chr5:180231255_C_G	chr5	180231155	180231355	+	0.10047799999999996	0.00279857231602912	mutated ERG motif
chr5:180288466_T_C	chr5	180288366	180288566	+	0.12658199999999994	0.0119705066872679	mutated ERG motif
chr5:33270962_T_C	chr5	33270862	33271062	+	0.09970600000000007	0.0467909253605273	mutated ERG motif
chr5:33808956_A_G	chr5	33808856	33809056	+	0.32572399999999996	3.11074403416466e-11	mutated ERG motif
chr5:33810584_C_T	chr5	33810484	33810684	+	-0.27721300000000004	5.6686026229309e-07	mutated ERG motif
chr5:33810669_G_A	chr5	33810569	33810769	+	0.314879	4.24112015584921e-11	mutated ERG motif
chr5:39547222_A_G	chr5	39547122	39547322	+	0.07530100000000006	0.0169674180033705	mutated ERG motif
chr5:52687415_T_C	chr5	52687315	52687515	+	0.19120500000000007	0.0233489379914668	mutated ERG motif
chr5:5288761_G_A	chr5	5288661	5288861	+	-0.211171	0.0100505444235096	mutated ERG motif
chr5:56679092_C_T	chr5	56678992	56679192	+	-0.04902799999999996	0.0239171723985659	mutated ERG motif
chr5:56681929_C_T	chr5	56681829	56682029	+	-0.050097	0.0239171723985659	mutated ERG motif
chr5:57129112_G_C	chr5	57129012	57129212	+	0.12625399999999998	0.0291183428184322	mutated ERG motif
chr5:57384721_T_C	chr5	57384621	57384821	+	-0.23166	0.00051506365753175	mutated ERG motif
chr5:64089910_T_C	chr5	64089810	64090010	+	0.239236	1.65421808953931e-10	mutated ERG motif
chr5:72451309_G_A	chr5	72451209	72451409	+	-0.258023	0.00013204302469256598	mutated ERG motif
chr5:75947817_CCTTT_C	chr5	75947717	75947917	+	-0.117504	0.0203425510481788	mutated ERG motif
chr5:9046892_T_C	chr5	9046792	9046992	+	-0.16950500000000002	0.0353725301473903	mutated ERG motif
chr5:9269246_G_A	chr5	9269146	9269346	+	0.18722299999999992	0.000618909503304431	mutated ERG motif
chr5:94081947_C_A	chr5	94081847	94082047	+	-0.188996	0.00540089291015549	mutated ERG motif
chr6:100737353_A_C	chr6	100737253	100737453	+	0.215302	0.000163546980523985	mutated ERG motif
chr6:106487938_C_T	chr6	106487838	106488038	+	0.28344499999999995	0.00111812908248625	mutated ERG motif
chr6:106980855_C_T	chr6	106980755	106980955	+	0.12314999999999998	1.41108861960048e-05	mutated ERG motif
chr6:11752628_C_G	chr6	11752528	11752728	+	-0.31406199999999995	3.884324439114879e-15	mutated ERG motif
chr6:11754744_G_T	chr6	11754644	11754844	+	-0.404497	4.95097383990349e-31	mutated ERG motif
chr6:127455821_C_A	chr6	127455721	127455921	+	-0.167723	3.45955747654645e-10	mutated ERG motif
chr6:131423566_T_A	chr6	131423466	131423666	+	0.2464350000000001	1.51059901299816e-12	mutated ERG motif
chr6:13396507_G_A	chr6	13396407	13396607	+	-0.092159	0.00653500470958665	mutated ERG motif
chr6:135062478_C_T	chr6	135062378	135062578	+	0.09228800000000004	3.3307143886644e-07	mutated ERG motif
chr6:148191419_C_A	chr6	148191319	148191519	+	0.12566299999999994	0.0392218968142083	mutated ERG motif
chr6:148768476_T_C	chr6	148768376	148768576	+	-0.061164999999999976	0.0209786179876078	mutated ERG motif
chr6:151280388_T_C	chr6	151280288	151280488	+	0.134285	0.00055113143160158	mutated ERG motif
chr6:151382470_C_T	chr6	151382370	151382570	+	0.31354699999999996	8.560553947879902e-16	mutated ERG motif
chr6:151413717_G_T	chr6	151413617	151413817	+	-0.20258400000000004	0.0151334787058688	mutated ERG motif
chr6:151414325_A_G	chr6	151414225	151414425	+	0.26852	6.867152674705378e-05	mutated ERG motif
chr6:153406657_G_A	chr6	153406557	153406757	+	0.11062700000000003	0.045858116260195	mutated ERG motif
chr6:154831795_CA_C	chr6	154831695	154831895	+	0.15507799999999994	0.039054532843872	mutated ERG motif
chr6:157804225_T_C	chr6	157804125	157804325	+	0.16717200000000002	0.0111305778844939	mutated ERG motif
chr6:18499005_C_G	chr6	18498905	18499105	+	0.12066499999999993	0.00941332963427614	mutated ERG motif
chr6:20623605_T_C	chr6	20623505	20623705	+	0.20131999999999994	2.2212802960614403e-12	mutated ERG motif
chr6:23350714_T_C	chr6	23350614	23350814	+	0.14724600000000002	0.00765099608259766	mutated ERG motif
chr6:25313943_A_C	chr6	25313843	25314043	+	0.17494600000000005	5.198534732138078e-07	mutated ERG motif
chr6:25391382_G_T	chr6	25391282	25391482	+	0.09161700000000006	0.0381361519474563	mutated ERG motif
chr6:25405074_C_T	chr6	25404974	25405174	+	-0.15399000000000002	0.00786920754712323	mutated ERG motif
chr6:26305407_C_G	chr6	26305307	26305507	+	-0.162234	0.00644306361894025	mutated ERG motif
chr6:2711003_G_A	chr6	2710903	2711103	+	-0.222456	0.00260907609740801	mutated ERG motif
chr6:2783985_T_G	chr6	2783885	2784085	+	0.13715200000000005	0.009156669409677059	mutated ERG motif
chr6:2851539_C_T	chr6	2851439	2851639	+	0.05023599999999995	0.0498575243922888	mutated ERG motif
chr6:2859686_A_G	chr6	2859586	2859786	+	-0.06618500000000005	0.00525000810048616	mutated ERG motif
chr6:30772725_A_G	chr6	30772625	30772825	+	0.11825600000000006	0.0418211998532012	mutated ERG motif
chr6:30784259_C_T	chr6	30784159	30784359	+	0.10390500000000004	0.00160738736278696	mutated ERG motif
chr6:30786038_G_A	chr6	30785938	30786138	+	0.09881800000000007	0.0168855333848086	mutated ERG motif
chr6:30787494_A_T	chr6	30787394	30787594	+	0.12551599999999996	0.00011946222816896899	mutated ERG motif
chr6:30787593_G_A	chr6	30787493	30787693	+	0.12710600000000005	0.00011946222816896899	mutated ERG motif
chr6:30884806_A_C	chr6	30884706	30884906	+	0.116494	0.0034723014741018608	mutated ERG motif
chr6:31364569_T_C	chr6	31364469	31364669	+	-0.250514	2.21522380841094e-05	mutated ERG motif
chr6:31364790_C_T	chr6	31364690	31364890	+	-0.243029	7.658660077583491e-05	mutated ERG motif
chr6:31366842_A_T	chr6	31366742	31366942	+	0.06706199999999995	0.0261466462044606	mutated ERG motif
chr6:31461372_A_T	chr6	31461272	31461472	+	-0.080955	0.034693783058480004	mutated ERG motif
chr6:31465915_G_C	chr6	31465815	31466015	+	-0.12562199999999996	0.0139392935381355	mutated ERG motif
chr6:33740382_G_A	chr6	33740282	33740482	+	-0.077521	0.00665008504899805	mutated ERG motif
chr6:37491070_T_C	chr6	37490970	37491170	+	0.08696899999999996	0.011073163466685	mutated ERG motif
chr6:3810310_C_T	chr6	3810210	3810410	+	0.06776199999999999	0.0218142069930307	mutated ERG motif
chr6:38781461_T_C	chr6	38781361	38781561	+	-0.260922	1.2771888978030901e-07	mutated ERG motif
chr6:38782034_T_C	chr6	38781934	38782134	+	0.2373430000000001	9.42227733066548e-07	mutated ERG motif
chr6:3912275_C_T	chr6	3912175	3912375	+	0.09003000000000005	0.0129299259121157	mutated ERG motif
chr6:44692995_G_C	chr6	44692895	44693095	+	0.16859000000000002	3.730549823493e-05	mutated ERG motif
chr6:54156793_G_GCTTC	chr6	54156693	54156893	+	-0.164968	0.00047792162651399695	mutated ERG motif
chr6:55393657_T_C	chr6	55393557	55393757	+	0.259386	0.0009357382333768028	mutated ERG motif
chr6:6313540_G_T	chr6	6313440	6313640	+	0.182904	0.00243049014352296	mutated ERG motif
chr6:80467462_G_A	chr6	80467362	80467562	+	0.13606200000000002	6.12426824518942e-06	mutated ERG motif
chr6:85307132_A_C	chr6	85307032	85307232	+	0.15732800000000002	0.0319225312585248	mutated ERG motif
chr6:85334237_G_A	chr6	85334137	85334337	+	0.09445200000000008	0.0175447078075537	mutated ERG motif
chr6:85686828_T_C	chr6	85686728	85686928	+	-0.06638699999999997	0.0016224716669488	mutated ERG motif
chr6:85759202_A_T	chr6	85759102	85759302	+	-0.302877	5.813622150565272e-07	mutated ERG motif
chr6:86092487_G_A	chr6	86092387	86092587	+	0.28225900000000004	8.593844979976221e-07	mutated ERG motif
chr6:86094056_G_A	chr6	86093956	86094156	+	0.281462	8.593844979976221e-07	mutated ERG motif
chr6:93958852_T_A	chr6	93958752	93958952	+	0.148648	0.00850743407328906	mutated ERG motif
chr7:10083316_G_A	chr7	10083216	10083416	+	-0.204141	0.00374717731129745	mutated ERG motif
chr7:115939291_G_A	chr7	115939191	115939391	+	0.150551	0.000717978257296401	mutated ERG motif
chr7:122679764_A_G	chr7	122679664	122679864	+	0.16888400000000006	0.000174104209525149	mutated ERG motif
chr7:132186896_G_A	chr7	132186796	132186996	+	-0.228006	3.74176660738981e-08	mutated ERG motif
chr7:133992315_C_A	chr7	133992215	133992415	+	-0.184041	0.0170551500400935	mutated ERG motif
chr7:14018901_C_A	chr7	14018801	14019001	+	-0.12568600000000002	0.00520037366822804	mutated ERG motif
chr7:143732990_C_T	chr7	143732890	143733090	+	0.12719399999999992	0.0393357634580012	mutated ERG motif
chr7:149194200_G_A	chr7	149194100	149194300	+	-0.15552699999999994	0.0183634486206293	mutated ERG motif
chr7:151284709_G_T	chr7	151284609	151284809	+	0.27624399999999993	7.142207963068571e-11	mutated ERG motif
chr7:155005209_A_G	chr7	155005109	155005309	+	0.18847899999999995	0.00113969932300932	mutated ERG motif
chr7:22704243_C_A	chr7	22704143	22704343	+	-0.032131999999999994	0.0406231375001057	mutated ERG motif
chr7:22714099_T_A	chr7	22713999	22714199	+	0.04425900000000005	0.0149882723498783	mutated ERG motif
chr7:22740513_C_G	chr7	22740413	22740613	+	-0.21515100000000004	9.1191716982428e-05	mutated ERG motif
chr7:30508784_T_C	chr7	30508684	30508884	+	-0.048072999999999984	0.0162152526721032	mutated ERG motif
chr7:40338371_C_T	chr7	40338271	40338471	+	-0.03812500000000002	0.023022934381488	mutated ERG motif
chr7:56121304_G_A	chr7	56121204	56121404	+	0.13147600000000004	0.0055826158785172286	mutated ERG motif
chr7:577651_C_T	chr7	577551	577751	+	-0.184676	1.98822082148585e-05	mutated ERG motif
chr7:581418_C_T	chr7	581318	581518	+	-0.249129	1.28093570938952e-08	mutated ERG motif
chr7:5814201_C_T	chr7	5814101	5814301	+	-0.144413	7.11849539293548e-06	mutated ERG motif
chr7:5819911_G_T	chr7	5819811	5820011	+	0.10743599999999998	0.0138367701850234	mutated ERG motif
chr7:5821362_C_T	chr7	5821262	5821462	+	0.107483	0.0138367701850234	mutated ERG motif
chr7:73098456_G_A	chr7	73098356	73098556	+	0.133525	0.0460097107195773	mutated ERG motif
chr7:7899987_C_T	chr7	7899887	7900087	+	-0.07297500000000001	0.0239597764790825	mutated ERG motif
chr7:80798697_A_G	chr7	80798597	80798797	+	0.15216200000000002	0.0122922562562196	mutated ERG motif
chr7:83653462_A_T	chr7	83653362	83653562	+	0.15793900000000005	0.012301077837742	mutated ERG motif
chr7:93566908_C_T	chr7	93566808	93567008	+	0.08325199999999999	0.0361167386568123	mutated ERG motif
chr7:93579517_G_A	chr7	93579417	93579617	+	-0.195793	0.0279596544813113	mutated ERG motif
chr7:93672750_A_C	chr7	93672650	93672850	+	0.16806400000000002	2.6438272198243105e-05	mutated ERG motif
chr7:99594726_T_C	chr7	99594626	99594826	+	0.115568	0.0192091627930034	mutated ERG motif
chr8:10585814_A_T	chr8	10585714	10585914	+	-0.10430700000000004	0.0180447366572694	mutated ERG motif
chr8:10676542_G_T	chr8	10676442	10676642	+	-0.188276	0.0191241947651467	mutated ERG motif
chr8:118718610_T_C	chr8	118718510	118718710	+	0.09934600000000003	0.0412233923577487	mutated ERG motif
chr8:119214984_C_T	chr8	119214884	119215084	+	-0.09530500000000004	0.0221365408478511	mutated ERG motif
chr8:119451204_G_A	chr8	119451104	119451304	+	0.07779199999999997	0.000709439364658073	mutated ERG motif
chr8:119453042_A_C	chr8	119452942	119453142	+	-0.06527799999999995	0.0112713991845311	mutated ERG motif
chr8:120168446_C_A	chr8	120168346	120168546	+	0.260571	2.83015893073063e-07	mutated ERG motif
chr8:12909044_A_G	chr8	12908944	12909144	+	-0.105416	0.0173507353514477	mutated ERG motif
chr8:130735662_C_T	chr8	130735562	130735762	+	-0.13889400000000002	0.0114236376151311	mutated ERG motif
chr8:131119072_C_T	chr8	131118972	131119172	+	-0.26924099999999995	3.4580751554426196e-07	mutated ERG motif
chr8:13152010_G_T	chr8	13151910	13152110	+	-0.180952	0.0019109246163312	mutated ERG motif
chr8:131780793_A_T	chr8	131780693	131780893	+	-0.211622	0.00988705995681931	mutated ERG motif
chr8:131781146_A_C	chr8	131781046	131781246	+	-0.211552	0.00988705995681931	mutated ERG motif
chr8:13219667_G_T	chr8	13219567	13219767	+	-0.14383800000000002	1.46207933181939e-23	mutated ERG motif
chr8:13225960_A_C	chr8	13225860	13226060	+	0.117498	6.54769161501013e-09	mutated ERG motif
chr8:13229684_T_C	chr8	13229584	13229784	+	-0.043298999999999976	0.0110363064647023	mutated ERG motif
chr8:13230164_C_T	chr8	13230064	13230264	+	-0.151343	1.72198914642873e-23	mutated ERG motif
chr8:13513399_C_T	chr8	13513299	13513499	+	0.13193900000000006	5.7891601159280394e-05	mutated ERG motif
chr8:141960578_T_C	chr8	141960478	141960678	+	0.10962799999999996	3.10073510102681e-05	mutated ERG motif
chr8:142139028_G_T	chr8	142138928	142139128	+	-0.08475600000000005	0.0407085816264749	mutated ERG motif
chr8:17466313_T_C	chr8	17466213	17466413	+	0.210757	2.70411068170001e-23	mutated ERG motif
chr8:17468580_G_C	chr8	17468480	17468680	+	0.20582100000000006	7.09523623149582e-30	mutated ERG motif
chr8:19327151_C_G	chr8	19327051	19327251	+	0.105101	0.00414591099821771	mutated ERG motif
chr8:19532764_A_T	chr8	19532664	19532864	+	0.10548500000000004	0.00472813153211488	mutated ERG motif
chr8:19613134_G_T	chr8	19613034	19613234	+	-0.14546399999999998	9.96345627672662e-05	mutated ERG motif
chr8:19614013_G_A	chr8	19613913	19614113	+	-0.17928499999999994	2.00840136283344e-06	mutated ERG motif
chr8:20285702_T_C	chr8	20285602	20285802	+	-0.377986	1.5275874189073e-12	mutated ERG motif
chr8:226305_C_G	chr8	226205	226405	+	-0.11085199999999999	0.00245433249887758	mutated ERG motif
chr8:226839_G_A	chr8	226739	226939	+	-0.09320100000000003	0.00574487250359719	mutated ERG motif
chr8:23179344_G_A	chr8	23179244	23179444	+	-0.12992800000000004	6.36744004362648e-05	mutated ERG motif
chr8:26317336_A_G	chr8	26317236	26317436	+	0.08888499999999999	0.0423804723095055	mutated ERG motif
chr8:31143872_T_G	chr8	31143772	31143972	+	0.236537	0.00132049087364928	mutated ERG motif
chr8:32185294_A_C	chr8	32185194	32185394	+	0.036115000000000015	0.0386256522335258	mutated ERG motif
chr8:32421271_A_G	chr8	32421171	32421371	+	0.13255799999999995	0.0209034872708478	mutated ERG motif
chr8:34523224_A_G	chr8	34523124	34523324	+	0.16776800000000006	0.0159907413968551	mutated ERG motif
chr8:40626365_G_T	chr8	40626265	40626465	+	-0.187612	0.00123781782673608	mutated ERG motif
chr8:41053548_C_T	chr8	41053448	41053648	+	-0.2487	0.000551196313157651	mutated ERG motif
chr8:51554074_C_A	chr8	51553974	51554174	+	-0.22453	0.000195436411386121	mutated ERG motif
chr8:51556107_G_C	chr8	51556007	51556207	+	-0.224697	0.000195436411386121	mutated ERG motif
chr8:58798575_T_A	chr8	58798475	58798675	+	-0.14975100000000002	0.0197347678619437	mutated ERG motif
chr8:61150883_C_G	chr8	61150783	61150983	+	0.14440399999999998	0.0035537866747456202	mutated ERG motif
chr8:638392_A_G	chr8	638292	638492	+	0.1373310000000001	0.0381438216247457	mutated ERG motif
chr8:6386286_A_G	chr8	6386186	6386386	+	0.185991	0.00010574792856816	mutated ERG motif
chr8:6387042_T_C	chr8	6386942	6387142	+	0.10384899999999997	0.0162709753523821	mutated ERG motif
chr8:68898470_C_T	chr8	68898370	68898570	+	0.108336	0.00332844580653277	mutated ERG motif
chr8:68905278_C_T	chr8	68905178	68905378	+	0.09217600000000004	0.0224610761684683	mutated ERG motif
chr8:73349526_T_G	chr8	73349426	73349626	+	0.206967	0.00270986240279346	mutated ERG motif
chr8:8148270_C_G	chr8	8148170	8148370	+	0.164053	6.805057039816421e-05	mutated ERG motif
chr8:8188576_A_G	chr8	8188476	8188676	+	0.11957299999999993	5.43116477919965e-06	mutated ERG motif
chr8:8869664_G_A	chr8	8869564	8869764	+	0.16480499999999998	0.00047024854557358895	mutated ERG motif
chr8:89337704_C_T	chr8	89337604	89337804	+	0.123884	0.000858535651187624	mutated ERG motif
chr8:94948841_G_T	chr8	94948741	94948941	+	-0.112587	0.0416330376261642	mutated ERG motif
chr9:101103591_G_A	chr9	101103491	101103691	+	-0.08673100000000006	0.0137020746449227	mutated ERG motif
chr9:101103664_A_C	chr9	101103564	101103764	+	-0.08682099999999998	0.0137020746449227	mutated ERG motif
chr9:101104363_A_G	chr9	101104263	101104463	+	0.05892600000000004	0.039949728538923986	mutated ERG motif
chr9:104434664_A_G	chr9	104434564	104434764	+	0.253375	9.265744809401579e-07	mutated ERG motif
chr9:104435480_A_G	chr9	104435380	104435580	+	0.169605	0.00131172695693416	mutated ERG motif
chr9:114367123_G_A	chr9	114367023	114367223	+	0.14686100000000002	0.0394212716476788	mutated ERG motif
chr9:117663550_C_T	chr9	117663450	117663650	+	-0.07556999999999997	0.00355926636058643	mutated ERG motif
chr9:117665187_G_A	chr9	117665087	117665287	+	-0.075575	0.00355926636058643	mutated ERG motif
chr9:117969073_G_A	chr9	117968973	117969173	+	0.27444899999999994	0.00133824566549033	mutated ERG motif
chr9:121299909_A_G	chr9	121299809	121300009	+	0.08824800000000001	0.0231043320865985	mutated ERG motif
chr9:124331465_G_A	chr9	124331365	124331565	+	-0.139971	3.87209638752965e-06	mutated ERG motif
chr9:130308457_T_A	chr9	130308357	130308557	+	0.09214999999999997	0.0191461331875527	mutated ERG motif
chr9:130855261_C_T	chr9	130855161	130855361	+	0.16132999999999995	0.000528533635486564	mutated ERG motif
chr9:132248130_A_G	chr9	132248030	132248230	+	0.14277700000000004	1.27863135902106e-05	mutated ERG motif
chr9:132253981_C_G	chr9	132253881	132254081	+	0.15972299999999995	6.02484932298922e-06	mutated ERG motif
chr9:136811747_A_G	chr9	136811647	136811847	+	0.05923999999999996	0.0387146511521195	mutated ERG motif
chr9:136812251_A_C	chr9	136812151	136812351	+	-0.06017400000000001	0.0307695324078597	mutated ERG motif
chr9:13804111_T_C	chr9	13804011	13804211	+	0.20187	5.855802883641601e-05	mutated ERG motif
chr9:139535855_T_C	chr9	139535755	139535955	+	0.3443290000000001	8.73277731638267e-06	mutated ERG motif
chr9:32883218_G_C	chr9	32883118	32883318	+	0.25561	4.12574446687359e-09	mutated ERG motif
chr9:35949346_A_G	chr9	35949246	35949446	+	0.10802	0.00760291738374895	mutated ERG motif
chr9:5493981_C_T	chr9	5493881	5494081	+	0.121761	0.00143646835550871	mutated ERG motif
chr9:5500300_A_G	chr9	5500200	5500400	+	0.121027	0.0062924463688376715	mutated ERG motif
chr9:6099531_T_C	chr9	6099431	6099631	+	0.10907700000000008	0.00187979831683619	mutated ERG motif
chr9:686753_G_A	chr9	686653	686853	+	0.06687100000000001	0.0267039790488048	mutated ERG motif
chr9:699065_C_G	chr9	698965	699165	+	-0.08713500000000003	0.00328684671161635	mutated ERG motif
chr9:71743529_T_C	chr9	71743429	71743629	+	-0.107224	0.0141224663726374	mutated ERG motif
chr9:90184112_A_C	chr9	90184012	90184212	+	0.063527	4.73824535248378e-08	mutated ERG motif
chr9:90184388_A_G	chr9	90184288	90184488	+	0.03976499999999994	0.00485153027888016	mutated ERG motif
chr9:90184648_T_A	chr9	90184548	90184748	+	0.06694100000000003	9.56684574297096e-09	mutated ERG motif
chr9:90188191_C_T	chr9	90188091	90188291	+	0.06602700000000006	1.56713419046278e-08	mutated ERG motif
chr9:90188192_C_G	chr9	90188092	90188292	+	-0.05712399999999995	3.9434676275905e-07	mutated ERG motif
chr10:101287314_C_T	chr10	101287214	101287414	+	0.19749799999999995	0.0009454777049000539	mutated MAGGIE motif
chr10:101287580_C_T	chr10	101287480	101287680	+	-0.185857	0.0009454777049000539	mutated MAGGIE motif
chr10:101287944_A_C	chr10	101287844	101288044	+	-0.17056700000000002	0.00127031455478623	mutated MAGGIE motif
chr10:101288020_A_T	chr10	101287920	101288120	+	0.179493	0.0009635344652219741	mutated MAGGIE motif
chr10:101288099_C_G	chr10	101287999	101288199	+	-0.170557	0.00127031455478623	mutated MAGGIE motif
chr10:101288238_G_T	chr10	101288138	101288338	+	-0.17057100000000006	0.00127031455478623	mutated MAGGIE motif
chr10:101289123_T_C	chr10	101289023	101289223	+	0.179493	0.0009635344652219741	mutated MAGGIE motif
chr10:101289998_A_G	chr10	101289898	101290098	+	-0.16434099999999996	0.0018007139888468102	mutated MAGGIE motif
chr10:101293856_C_T	chr10	101293756	101293956	+	0.21854	0.00139371741454685	mutated MAGGIE motif
chr10:101295863_A_G	chr10	101295763	101295963	+	-0.16953200000000002	0.00127031455478623	mutated MAGGIE motif
chr10:101726068_G_A	chr10	101725968	101726168	+	0.08115299999999992	0.0154052086418583	mutated MAGGIE motif
chr10:101729953_C_T	chr10	101729853	101730053	+	0.08568199999999992	0.0133395090588352	mutated MAGGIE motif
chr10:101730641_A_C	chr10	101730541	101730741	+	0.07531899999999991	0.0340158758364736	mutated MAGGIE motif
chr10:101731631_A_G	chr10	101731531	101731731	+	0.087418	0.0133395090588352	mutated MAGGIE motif
chr10:101733490_A_G	chr10	101733390	101733590	+	0.08747499999999997	0.0133395090588352	mutated MAGGIE motif
chr10:101736918_A_G	chr10	101736818	101737018	+	0.087507	0.0133395090588352	mutated MAGGIE motif
chr10:101739349_G_A	chr10	101739249	101739449	+	0.07874999999999999	0.016957782468106003	mutated MAGGIE motif
chr10:101742702_A_G	chr10	101742602	101742802	+	0.08762199999999998	0.0133395090588352	mutated MAGGIE motif
chr10:101744669_C_T	chr10	101744569	101744769	+	0.08743900000000003	0.0133395090588352	mutated MAGGIE motif
chr10:101746339_A_G	chr10	101746239	101746439	+	0.08741499999999991	0.0133395090588352	mutated MAGGIE motif
chr10:101768397_A_G	chr10	101768297	101768497	+	0.100773	0.0101165681107019	mutated MAGGIE motif
chr10:101803065_C_T	chr10	101802965	101803165	+	0.15091199999999996	0.00239687720799591	mutated MAGGIE motif
chr10:101804114_C_T	chr10	101804014	101804214	+	0.14719499999999994	0.00239687720799591	mutated MAGGIE motif
chr10:101805442_C_T	chr10	101805342	101805542	+	0.13180100000000006	0.005589621973302711	mutated MAGGIE motif
chr10:101806252_A_G	chr10	101806152	101806352	+	0.13179399999999994	0.005589621973302711	mutated MAGGIE motif
chr10:102901263_G_T	chr10	102901163	102901363	+	0.153543	0.035794771698268994	mutated MAGGIE motif
chr10:104384337_A_G	chr10	104384237	104384437	+	0.113147	0.000664503533580472	mutated MAGGIE motif
chr10:104386309_T_A	chr10	104386209	104386409	+	-0.11781999999999998	0.000261598668403179	mutated MAGGIE motif
chr10:104391285_C_T	chr10	104391185	104391385	+	0.166678	1.2862537113991197e-07	mutated MAGGIE motif
chr10:104393489_A_G	chr10	104393389	104393589	+	0.15526600000000002	2.74453499277327e-07	mutated MAGGIE motif
chr10:104953007_C_G	chr10	104952907	104953107	+	0.17131600000000002	0.0010949215045209	mutated MAGGIE motif
chr10:104953021_C_A	chr10	104952921	104953121	+	0.14830200000000004	0.00890216647196322	mutated MAGGIE motif
chr10:104954795_G_A	chr10	104954695	104954895	+	0.207105	2.9303414724285997e-06	mutated MAGGIE motif
chr10:105726338_T_C	chr10	105726238	105726438	+	-0.103232	0.0365294870368254	mutated MAGGIE motif
chr10:105726812_A_G	chr10	105726712	105726912	+	-0.09833400000000003	0.0365294870368254	mutated MAGGIE motif
chr10:105727874_A_G	chr10	105727774	105727974	+	-0.12072899999999998	0.0365294870368254	mutated MAGGIE motif
chr10:105728280_G_A	chr10	105728180	105728380	+	-0.099514	0.0365294870368254	mutated MAGGIE motif
chr10:105729054_C_G	chr10	105728954	105729154	+	-0.092142	0.0365294870368254	mutated MAGGIE motif
chr10:105780706_C_A	chr10	105780606	105780806	+	-0.16533000000000006	0.00840697064356546	mutated MAGGIE motif
chr10:105780726_T_A	chr10	105780626	105780826	+	-0.16675100000000004	0.00840697064356546	mutated MAGGIE motif
chr10:105781166_T_C	chr10	105781066	105781266	+	-0.16413699999999998	0.00840697064356546	mutated MAGGIE motif
chr10:105811218_T_A	chr10	105811118	105811318	+	-0.103223	0.00142785789825407	mutated MAGGIE motif
chr10:105814139_C_T	chr10	105814039	105814239	+	0.098128	3.21560909169294e-05	mutated MAGGIE motif
chr10:105814826_C_A	chr10	105814726	105814926	+	0.09471800000000008	4.2603078846121396e-05	mutated MAGGIE motif
chr10:105817214_C_<	chr10	105817114	105817314	+	-0.06097600000000002	0.000596769666421684	mutated MAGGIE motif
chr10:10840535_G_A	chr10	10840435	10840635	+	-0.234772	8.733935412758729e-05	mutated MAGGIE motif
chr10:114074521_C_G	chr10	114074421	114074621	+	-0.13262199999999996	0.0187627613818732	mutated MAGGIE motif
chr10:114074579_G_C	chr10	114074479	114074679	+	-0.13297899999999999	0.0187627613818732	mutated MAGGIE motif
chr10:114074585_A_G	chr10	114074485	114074685	+	-0.13297399999999998	0.0187627613818732	mutated MAGGIE motif
chr10:114075199_A_G	chr10	114075099	114075299	+	-0.132973	0.0187627613818732	mutated MAGGIE motif
chr10:115316812_T_C	chr10	115316712	115316912	+	-0.06763400000000003	0.0488102726730339	mutated MAGGIE motif
chr10:115784493_A_G	chr10	115784393	115784593	+	0.16771400000000006	0.0015665451162146901	mutated MAGGIE motif
chr10:115784692_C_T	chr10	115784592	115784792	+	0.16758799999999996	0.0015665451162146901	mutated MAGGIE motif
chr10:115787415_G_A	chr10	115787315	115787515	+	0.16758300000000004	0.0015665451162146901	mutated MAGGIE motif
chr10:115787889_C_T	chr10	115787789	115787989	+	0.16768300000000005	0.0015665451162146901	mutated MAGGIE motif
chr10:116383343_G_T	chr10	116383243	116383443	+	0.09835799999999996	0.00480629353316314	mutated MAGGIE motif
chr10:116384062_C_A	chr10	116383962	116384162	+	-0.19016900000000006	0.0006935372313735089	mutated MAGGIE motif
chr10:116384223_C_A	chr10	116384123	116384323	+	-0.190329	0.0006935372313735089	mutated MAGGIE motif
chr10:120512839_C_T	chr10	120512739	120512939	+	0.10183699999999997	0.0457504330468957	mutated MAGGIE motif
chr10:120515182_T_C	chr10	120515082	120515282	+	0.08817799999999998	0.0485566982064136	mutated MAGGIE motif
chr10:120515435_C_T	chr10	120515335	120515535	+	0.10456699999999997	0.0457504330468957	mutated MAGGIE motif
chr10:120956728_G_C	chr10	120956628	120956828	+	-0.20834899999999995	2.5832469232527e-09	mutated MAGGIE motif
chr10:120957680_C_A	chr10	120957580	120957780	+	0.22047399999999995	1.17935379232826e-11	mutated MAGGIE motif
chr10:120957885_T_C	chr10	120957785	120957985	+	-0.227696	1.25151686908345e-12	mutated MAGGIE motif
chr10:122182111_G_A	chr10	122182011	122182211	+	0.16450699999999996	0.00214777073157814	mutated MAGGIE motif
chr10:122182698_G_A	chr10	122182598	122182798	+	-0.11945	0.0341218951629862	mutated MAGGIE motif
chr10:122183020_C_G	chr10	122182920	122183120	+	0.13936499999999996	0.0421110232198681	mutated MAGGIE motif
chr10:122184443_A_T	chr10	122184343	122184543	+	0.13948900000000009	0.0421110232198681	mutated MAGGIE motif
chr10:122184489_T_G	chr10	122184389	122184589	+	0.13003999999999993	0.0238300556692295	mutated MAGGIE motif
chr10:122186330_G_A	chr10	122186230	122186430	+	0.13948700000000006	0.0421110232198681	mutated MAGGIE motif
chr10:122188874_A_G	chr10	122188774	122188974	+	0.13948300000000002	0.0421110232198681	mutated MAGGIE motif
chr10:122189070_G_A	chr10	122188970	122189170	+	0.1782229999999999	0.000904934763160284	mutated MAGGIE motif
chr10:122216790_A_T	chr10	122216690	122216890	+	0.08846299999999996	0.0404191108069453	mutated MAGGIE motif
chr10:122216862_C_T	chr10	122216762	122216962	+	-0.11278100000000002	0.0138011398595354	mutated MAGGIE motif
chr10:122217471_G_A	chr10	122217371	122217571	+	-0.08757999999999999	0.0465307262028861	mutated MAGGIE motif
chr10:12307827_C_T	chr10	12307727	12307927	+	-0.148963	0.0468608995355871	mutated MAGGIE motif
chr10:12307894_C_T	chr10	12307794	12307994	+	0.15022999999999995	0.0468608995355871	mutated MAGGIE motif
chr10:123732431_A_G	chr10	123732331	123732531	+	0.09559399999999996	0.0409161676764375	mutated MAGGIE motif
chr10:123733051_C_A	chr10	123732951	123733151	+	0.095603	0.0409161676764375	mutated MAGGIE motif
chr10:123733962_C_T	chr10	123733862	123734062	+	0.097982	0.0409161676764375	mutated MAGGIE motif
chr10:123734989_C_G	chr10	123734889	123735089	+	-0.08504799999999996	0.0409161676764375	mutated MAGGIE motif
chr10:124221276_G_T	chr10	124221176	124221376	+	0.140343	0.0217238877263209	mutated MAGGIE motif
chr10:124222105_G_C	chr10	124222005	124222205	+	-0.162314	0.0217238877263209	mutated MAGGIE motif
chr10:126357352_T_C	chr10	126357252	126357452	+	0.090267	0.0482031732941785	mutated MAGGIE motif
chr10:126357981_T_C	chr10	126357881	126358081	+	0.10491099999999998	0.0466763655501722	mutated MAGGIE motif
chr10:126358073_G_T	chr10	126357973	126358173	+	-0.10307100000000002	0.0466763655501722	mutated MAGGIE motif
chr10:126746446_C_T	chr10	126746346	126746546	+	-0.106535	0.0485408585611269	mutated MAGGIE motif
chr10:126747046_C_T	chr10	126746946	126747146	+	-0.105643	0.0485408585611269	mutated MAGGIE motif
chr10:126747542_C_A	chr10	126747442	126747642	+	-0.13349299999999995	0.00503562612021048	mutated MAGGIE motif
chr10:126747658_C_T	chr10	126747558	126747758	+	-0.106734	0.0485408585611269	mutated MAGGIE motif
chr10:126750534_G_T	chr10	126750434	126750634	+	-0.13753200000000004	0.0038629662721190203	mutated MAGGIE motif
chr10:126840272_C_T	chr10	126840172	126840372	+	0.11647600000000002	0.0100665052785031	mutated MAGGIE motif
chr10:126840928_A_G	chr10	126840828	126841028	+	0.11637700000000005	0.0100665052785031	mutated MAGGIE motif
chr10:126842554_G_A	chr10	126842454	126842654	+	0.102754	0.0153063631698196	mutated MAGGIE motif
chr10:126843367_G_A	chr10	126843267	126843467	+	0.116078	0.0100665052785031	mutated MAGGIE motif
chr10:126844523_T_A	chr10	126844423	126844623	+	0.08802500000000002	0.0153063631698196	mutated MAGGIE motif
chr10:126844621_C_T	chr10	126844521	126844721	+	0.10273599999999994	0.0153063631698196	mutated MAGGIE motif
chr10:126850367_C_T	chr10	126850267	126850467	+	-0.10234299999999996	0.0427269980248515	mutated MAGGIE motif
chr10:126850793_C_G	chr10	126850693	126850893	+	0.08660400000000001	0.0235823468556122	mutated MAGGIE motif
chr10:126851174_T_C	chr10	126851074	126851274	+	0.08691000000000004	0.0235823468556122	mutated MAGGIE motif
chr10:127644960_G_A	chr10	127644860	127645060	+	-0.14902300000000002	0.0442319081606797	mutated MAGGIE motif
chr10:127770127_G_C	chr10	127770027	127770227	+	-0.12072500000000005	0.0158507331789611	mutated MAGGIE motif
chr10:130836867_G_<	chr10	130836767	130836967	+	-0.160902	0.00227390679734752	mutated MAGGIE motif
chr10:130839084_A_G	chr10	130838984	130839184	+	0.13576699999999994	0.0420772160964653	mutated MAGGIE motif
chr10:134000962_G_A	chr10	134000862	134001062	+	-0.16102100000000005	0.0257663840619804	mutated MAGGIE motif
chr10:134406401_A_G	chr10	134406301	134406501	+	-0.169724	0.0418218300054154	mutated MAGGIE motif
chr10:134406650_T_C	chr10	134406550	134406750	+	-0.16033699999999998	0.0418218300054154	mutated MAGGIE motif
chr10:134406839_G_A	chr10	134406739	134406939	+	-0.16094999999999998	0.0418218300054154	mutated MAGGIE motif
chr10:134406992_T_C	chr10	134406892	134407092	+	-0.16969800000000002	0.0418218300054154	mutated MAGGIE motif
chr10:134407237_A_T	chr10	134407137	134407337	+	-0.16063499999999994	0.0418218300054154	mutated MAGGIE motif
chr10:134407255_A_AT	chr10	134407155	134407355	+	-0.16063499999999994	0.0418218300054154	mutated MAGGIE motif
chr10:14001248_C_A	chr10	14001148	14001348	+	-0.08586300000000002	0.0372239048925607	mutated MAGGIE motif
chr10:14001343_G_A	chr10	14001243	14001443	+	0.07983399999999996	0.0175934476142728	mutated MAGGIE motif
chr10:14001454_A_G	chr10	14001354	14001554	+	0.08147799999999994	0.0175934476142728	mutated MAGGIE motif
chr10:14001507_G_T	chr10	14001407	14001607	+	0.08208100000000007	0.0175934476142728	mutated MAGGIE motif
chr10:14001508_TGA_T	chr10	14001408	14001608	+	0.07979899999999995	0.0188682133485739	mutated MAGGIE motif
chr10:14002221_T_C	chr10	14002121	14002321	+	0.08689999999999998	0.0175934476142728	mutated MAGGIE motif
chr10:14003363_C_T	chr10	14003263	14003463	+	0.08263100000000001	0.0175934476142728	mutated MAGGIE motif
chr10:14024991_G_A	chr10	14024891	14025091	+	-0.04758299999999999	0.00345000302446343	mutated MAGGIE motif
chr10:14025859_C_T	chr10	14025759	14025959	+	0.06281300000000001	5.64472017540129e-05	mutated MAGGIE motif
chr10:14026046_A_G	chr10	14025946	14026146	+	0.06370299999999995	9.481675223112801e-05	mutated MAGGIE motif
chr10:14026870_G_C	chr10	14026770	14026970	+	0.084368	1.05664346156949e-06	mutated MAGGIE motif
chr10:14028195_A_C	chr10	14028095	14028295	+	0.08435500000000007	1.05664346156949e-06	mutated MAGGIE motif
chr10:14028489_A_G	chr10	14028389	14028589	+	0.08362599999999998	1.05664346156949e-06	mutated MAGGIE motif
chr10:14029682_G_A	chr10	14029582	14029782	+	0.08362400000000003	1.05664346156949e-06	mutated MAGGIE motif
chr10:14029701_G_A	chr10	14029601	14029801	+	0.08363900000000002	1.05664346156949e-06	mutated MAGGIE motif
chr10:14029742_T_C	chr10	14029642	14029842	+	0.08363299999999996	1.05664346156949e-06	mutated MAGGIE motif
chr10:14030067_G_A	chr10	14029967	14030167	+	0.083673	1.05664346156949e-06	mutated MAGGIE motif
chr10:14030161_C_T	chr10	14030061	14030261	+	0.08442099999999997	1.05664346156949e-06	mutated MAGGIE motif
chr10:14030276_G_A	chr10	14030176	14030376	+	-0.04344499999999996	0.0046408844706046105	mutated MAGGIE motif
chr10:14030319_T_G	chr10	14030219	14030419	+	0.08456200000000003	1.05664346156949e-06	mutated MAGGIE motif
chr10:14031051_T_C	chr10	14030951	14031151	+	0.083642	1.05664346156949e-06	mutated MAGGIE motif
chr10:14031419_C_A	chr10	14031319	14031519	+	0.08362599999999998	1.05664346156949e-06	mutated MAGGIE motif
chr10:14031420_A_G	chr10	14031320	14031520	+	0.08362599999999998	1.05664346156949e-06	mutated MAGGIE motif
chr10:14031709_G_T	chr10	14031609	14031809	+	0.08363699999999996	1.05664346156949e-06	mutated MAGGIE motif
chr10:14032099_T_G	chr10	14031999	14032199	+	0.07886599999999999	6.67256425778411e-06	mutated MAGGIE motif
chr10:14032115_T_C	chr10	14032015	14032215	+	0.07884999999999998	6.67256425778411e-06	mutated MAGGIE motif
chr10:14032199_C_T	chr10	14032099	14032299	+	0.07882800000000001	6.67256425778411e-06	mutated MAGGIE motif
chr10:14032326_G_C	chr10	14032226	14032426	+	0.07264599999999999	1.22775131313137e-05	mutated MAGGIE motif
chr10:14032358_G_A	chr10	14032258	14032458	+	0.07293900000000009	1.19539192609547e-05	mutated MAGGIE motif
chr10:14033667_G_A	chr10	14033567	14033767	+	0.07352799999999993	6.67256425778411e-06	mutated MAGGIE motif
chr10:14033729_G_A	chr10	14033629	14033829	+	0.07382500000000003	6.67256425778411e-06	mutated MAGGIE motif
chr10:14033992_G_C	chr10	14033892	14034092	+	0.07319500000000001	6.67256425778411e-06	mutated MAGGIE motif
chr10:14034402_A_G	chr10	14034302	14034502	+	0.07310099999999997	6.67256425778411e-06	mutated MAGGIE motif
chr10:14034508_A_G	chr10	14034408	14034608	+	0.07378000000000008	6.67256425778411e-06	mutated MAGGIE motif
chr10:14034519_G_A	chr10	14034419	14034619	+	0.07438800000000001	6.67256425778411e-06	mutated MAGGIE motif
chr10:14034552_C_T	chr10	14034452	14034652	+	0.07330400000000004	6.67256425778411e-06	mutated MAGGIE motif
chr10:14034678_G_T	chr10	14034578	14034778	+	-0.046096000000000026	0.00345000302446343	mutated MAGGIE motif
chr10:14034817_G_A	chr10	14034717	14034917	+	0.07318599999999997	6.67256425778411e-06	mutated MAGGIE motif
chr10:14034881_T_A	chr10	14034781	14034981	+	0.06910499999999997	1.10391972690599e-05	mutated MAGGIE motif
chr10:14035042_C_G	chr10	14034942	14035142	+	0.07345600000000008	6.67256425778411e-06	mutated MAGGIE motif
chr10:14035177_A_T	chr10	14035077	14035277	+	0.07310399999999995	6.67256425778411e-06	mutated MAGGIE motif
chr10:14035373_C_A	chr10	14035273	14035473	+	-0.044955000000000016	0.00446322314463775	mutated MAGGIE motif
chr10:14035543_G_C	chr10	14035443	14035643	+	0.073183	6.67256425778411e-06	mutated MAGGIE motif
chr10:14035837_T_G	chr10	14035737	14035937	+	0.073187	6.67256425778411e-06	mutated MAGGIE motif
chr10:14618113_T_G	chr10	14618013	14618213	+	0.04456199999999999	0.039495546669386	mutated MAGGIE motif
chr10:15239043_A_C	chr10	15238943	15239143	+	-0.04497299999999993	0.0270877329933935	mutated MAGGIE motif
chr10:15239498_A_G	chr10	15239398	15239598	+	-0.04564600000000002	0.010949526651169002	mutated MAGGIE motif
chr10:15245139_G_A	chr10	15245039	15245239	+	0.04058700000000004	0.0333379003263138	mutated MAGGIE motif
chr10:15247026_A_C	chr10	15246926	15247126	+	-0.065326	0.0244272595109052	mutated MAGGIE motif
chr10:16933460_G_T	chr10	16933360	16933560	+	0.19952399999999992	0.0029510174643774608	mutated MAGGIE motif
chr10:16933884_A_G	chr10	16933784	16933984	+	0.15147	0.0336964556298888	mutated MAGGIE motif
chr10:16933889_C_G	chr10	16933789	16933989	+	0.19945	0.0029510174643774608	mutated MAGGIE motif
chr10:17048280_G_A	chr10	17048180	17048380	+	0.08995399999999998	0.0138221214328513	mutated MAGGIE motif
chr10:17049331_G_A	chr10	17049231	17049431	+	0.08960299999999999	0.0138221214328513	mutated MAGGIE motif
chr10:17049739_G_A	chr10	17049639	17049839	+	0.08981499999999998	0.0138221214328513	mutated MAGGIE motif
chr10:17050107_G_A	chr10	17050007	17050207	+	0.09031899999999993	0.0138221214328513	mutated MAGGIE motif
chr10:17050313_T_C	chr10	17050213	17050413	+	0.11091400000000007	0.00604831537451305	mutated MAGGIE motif
chr10:17158638_A_C	chr10	17158538	17158738	+	-0.091238	0.0486342601561387	mutated MAGGIE motif
chr10:17158728_C_T	chr10	17158628	17158828	+	-0.09149000000000003	0.0486342601561387	mutated MAGGIE motif
chr10:17248144_A_T	chr10	17248044	17248244	+	0.10235000000000004	0.0152520115014286	mutated MAGGIE motif
chr10:17248667_G_C	chr10	17248567	17248767	+	-0.14642899999999998	0.00154425910524487	mutated MAGGIE motif
chr10:17249487_C_A	chr10	17249387	17249587	+	-0.14639999999999995	0.00154425910524487	mutated MAGGIE motif
chr10:17249545_C_T	chr10	17249445	17249645	+	-0.14651599999999998	0.00154425910524487	mutated MAGGIE motif
chr10:17250200_GATCATGA_G	chr10	17250100	17250300	+	-0.14640599999999998	0.00154425910524487	mutated MAGGIE motif
chr10:17252158_T_C	chr10	17252058	17252258	+	-0.146326	0.00154425910524487	mutated MAGGIE motif
chr10:17252296_G_A	chr10	17252196	17252396	+	-0.14641400000000002	0.00154425910524487	mutated MAGGIE motif
chr10:17628161_T_C	chr10	17628061	17628261	+	0.11914599999999995	0.0270543409198818	mutated MAGGIE motif
chr10:17628514_C_A	chr10	17628414	17628614	+	0.11904499999999996	0.0270543409198818	mutated MAGGIE motif
chr10:17628852_G_T	chr10	17628752	17628952	+	0.13631499999999994	0.0158917172478102	mutated MAGGIE motif
chr10:17628905_C_T	chr10	17628805	17629005	+	0.13639899999999994	0.0158917172478102	mutated MAGGIE motif
chr10:17629088_G_T	chr10	17628988	17629188	+	0.13631499999999994	0.0158917172478102	mutated MAGGIE motif
chr10:17629467_T_C	chr10	17629367	17629567	+	0.13727100000000006	0.0158917172478102	mutated MAGGIE motif
chr10:17629765_C_G	chr10	17629665	17629865	+	0.13633799999999996	0.0158917172478102	mutated MAGGIE motif
chr10:23897160_G_C	chr10	23897060	23897260	+	-0.192156	0.021929271830012004	mutated MAGGIE motif
chr10:23897221_T_G	chr10	23897121	23897321	+	-0.192156	0.021929271830012004	mutated MAGGIE motif
chr10:23897234_A_T	chr10	23897134	23897334	+	-0.192156	0.021929271830012004	mutated MAGGIE motif
chr10:23897514_T_G	chr10	23897414	23897614	+	-0.192334	0.021929271830012004	mutated MAGGIE motif
chr10:23897960_G_T	chr10	23897860	23898060	+	-0.192156	0.021929271830012004	mutated MAGGIE motif
chr10:24496662_C_T	chr10	24496562	24496762	+	-0.143816	0.0018049154425302106	mutated MAGGIE motif
chr10:24497678_T_C	chr10	24497578	24497778	+	-0.162356	0.000700629926977125	mutated MAGGIE motif
chr10:24498403_G_A	chr10	24498303	24498503	+	0.16434300000000002	0.000793920061985934	mutated MAGGIE motif
chr10:24498570_C_G	chr10	24498470	24498670	+	-0.16244799999999998	0.000700629926977125	mutated MAGGIE motif
chr10:24499738_G_A	chr10	24499638	24499838	+	0.120745	0.009011962817544959	mutated MAGGIE motif
chr10:24499740_G_A	chr10	24499640	24499840	+	0.12068199999999996	0.009011962817544959	mutated MAGGIE motif
chr10:24499940_A_G	chr10	24499840	24500040	+	0.13657299999999994	0.00287347238050624	mutated MAGGIE motif
chr10:24670854_A_G	chr10	24670754	24670954	+	-0.15587800000000002	0.000178904618495171	mutated MAGGIE motif
chr10:24670973_T_C	chr10	24670873	24671073	+	-0.12781199999999998	0.00165991152418908	mutated MAGGIE motif
chr10:24671111_G_C	chr10	24671011	24671211	+	-0.12737600000000004	0.00165991152418908	mutated MAGGIE motif
chr10:24671410_A_G	chr10	24671310	24671510	+	-0.155841	0.000178904618495171	mutated MAGGIE motif
chr10:24671540_G_A	chr10	24671440	24671640	+	-0.15577600000000005	0.000178904618495171	mutated MAGGIE motif
chr10:24671578_G_A	chr10	24671478	24671678	+	-0.15584399999999998	0.000178904618495171	mutated MAGGIE motif
chr10:24671740_G_T	chr10	24671640	24671840	+	-0.15581500000000004	0.000178904618495171	mutated MAGGIE motif
chr10:24671771_TTC_T	chr10	24671671	24671871	+	-0.14497000000000002	0.000319142877744233	mutated MAGGIE motif
chr10:24671871_C_G	chr10	24671771	24671971	+	-0.15363100000000002	0.000178904618495171	mutated MAGGIE motif
chr10:24673229_A_G	chr10	24673129	24673329	+	-0.155856	0.000178904618495171	mutated MAGGIE motif
chr10:24673435_C_G	chr10	24673335	24673535	+	-0.15568200000000004	0.000178904618495171	mutated MAGGIE motif
chr10:24673497_T_C	chr10	24673397	24673597	+	-0.155906	0.000178904618495171	mutated MAGGIE motif
chr10:24673667_A_G	chr10	24673567	24673767	+	-0.15585500000000002	0.000178904618495171	mutated MAGGIE motif
chr10:24673906_C_T	chr10	24673806	24674006	+	-0.155841	0.000178904618495171	mutated MAGGIE motif
chr10:24674265_G_A	chr10	24674165	24674365	+	-0.15579699999999996	0.000178904618495171	mutated MAGGIE motif
chr10:24782246_T_C	chr10	24782146	24782346	+	0.143833	0.0396023295021868	mutated MAGGIE motif
chr10:24783384_T_C	chr10	24783284	24783484	+	0.14466700000000002	0.0396023295021868	mutated MAGGIE motif
chr10:27672403_T_C	chr10	27672303	27672503	+	-0.176678	0.000681889295633746	mutated MAGGIE motif
chr10:27672782_A_G	chr10	27672682	27672882	+	-0.195353	0.000229330750494811	mutated MAGGIE motif
chr10:27673128_C_T	chr10	27673028	27673228	+	0.182651	0.000681889295633746	mutated MAGGIE motif
chr10:27673654_T_C	chr10	27673554	27673754	+	-0.194545	0.000229330750494811	mutated MAGGIE motif
chr10:27673973_G_A	chr10	27673873	27674073	+	-0.19472799999999998	0.000229330750494811	mutated MAGGIE motif
chr10:29420206_T_C	chr10	29420106	29420306	+	-0.08318500000000001	0.0034616549308939893	mutated MAGGIE motif
chr10:29420405_C_T	chr10	29420305	29420505	+	0.08741599999999994	0.00044603806346623	mutated MAGGIE motif
chr10:29420552_T_C	chr10	29420452	29420652	+	0.08740500000000008	0.00044603806346623	mutated MAGGIE motif
chr10:29420875_T_A	chr10	29420775	29420975	+	-0.07714300000000003	0.0061844791499447395	mutated MAGGIE motif
chr10:29421804_C_A	chr10	29421704	29421904	+	-0.11991999999999994	1.28029843847301e-05	mutated MAGGIE motif
chr10:29421805_C_T	chr10	29421705	29421905	+	-0.11991799999999996	1.28029843847301e-05	mutated MAGGIE motif
chr10:29421807_C_G	chr10	29421707	29421907	+	-0.11991199999999995	1.28029843847301e-05	mutated MAGGIE motif
chr10:29421871_C_G	chr10	29421771	29421971	+	-0.12937200000000001	1.84508392904268e-06	mutated MAGGIE motif
chr10:29421872_T_A	chr10	29421772	29421972	+	-0.129367	1.84508392904268e-06	mutated MAGGIE motif
chr10:29422212_T_C	chr10	29422112	29422312	+	0.09213300000000002	0.00044603806346623	mutated MAGGIE motif
chr10:29422477_T_C	chr10	29422377	29422577	+	0.06225600000000009	0.013372301552434998	mutated MAGGIE motif
chr10:29422579_G_A	chr10	29422479	29422679	+	0.057554	0.0182395069117392	mutated MAGGIE motif
chr10:29422583_G_A	chr10	29422483	29422683	+	-0.11419800000000002	2.5496165355869298e-05	mutated MAGGIE motif
chr10:29604708_G_A	chr10	29604608	29604808	+	0.10993999999999993	0.0253678030578256	mutated MAGGIE motif
chr10:29605338_G_A	chr10	29605238	29605438	+	0.09186700000000003	0.0253678030578256	mutated MAGGIE motif
chr10:29605484_T_C	chr10	29605384	29605584	+	0.0918	0.0253678030578256	mutated MAGGIE motif
chr10:29842599_C_T	chr10	29842499	29842699	+	0.14722400000000002	0.00219141296133743	mutated MAGGIE motif
chr10:29842681_C_A	chr10	29842581	29842781	+	0.109769	0.0283642730056702	mutated MAGGIE motif
chr10:29842787_G_A	chr10	29842687	29842887	+	0.10753199999999996	0.0283642730056702	mutated MAGGIE motif
chr10:29843161_C_G	chr10	29843061	29843261	+	0.14472100000000002	0.00219141296133743	mutated MAGGIE motif
chr10:29843458_T_C	chr10	29843358	29843558	+	0.14655699999999994	0.00219141296133743	mutated MAGGIE motif
chr10:29843582_C_T	chr10	29843482	29843682	+	0.14738600000000002	0.00219141296133743	mutated MAGGIE motif
chr10:29843833_C_T	chr10	29843733	29843933	+	0.14696200000000004	0.00219141296133743	mutated MAGGIE motif
chr10:29844274_T_C	chr10	29844174	29844374	+	0.21191800000000005	6.800321059868311e-05	mutated MAGGIE motif
chr10:29844588_C_A	chr10	29844488	29844688	+	0.146281	0.00219141296133743	mutated MAGGIE motif
chr10:29844589_G_A	chr10	29844489	29844689	+	0.14635600000000004	0.00219141296133743	mutated MAGGIE motif
chr10:29844736_C_T	chr10	29844636	29844836	+	0.10379300000000002	0.033396178087952005	mutated MAGGIE motif
chr10:29845892_T_C	chr10	29845792	29845992	+	0.15502399999999994	0.00219141296133743	mutated MAGGIE motif
chr10:29846061_G_A	chr10	29845961	29846161	+	0.14646499999999996	0.00219141296133743	mutated MAGGIE motif
chr10:29846198_G_A	chr10	29846098	29846298	+	0.14835900000000002	0.00219141296133743	mutated MAGGIE motif
chr10:29846388_A_T	chr10	29846288	29846488	+	0.217371	5.29817383190101e-05	mutated MAGGIE motif
chr10:29870036_T_C	chr10	29869936	29870136	+	0.13331700000000002	0.0119842357792598	mutated MAGGIE motif
chr10:29870375_A_G	chr10	29870275	29870475	+	0.31606799999999996	7.966802183064309e-12	mutated MAGGIE motif
chr10:29870686_A_G	chr10	29870586	29870786	+	0.307338	3.22662750665932e-11	mutated MAGGIE motif
chr10:29870757_G_T	chr10	29870657	29870857	+	0.17850600000000005	0.0119842357792598	mutated MAGGIE motif
chr10:29871564_G_C	chr10	29871464	29871664	+	0.216175	2.08728997331056e-05	mutated MAGGIE motif
chr10:29871949_G_A	chr10	29871849	29872049	+	0.3365879999999999	2.2707726673255606e-13	mutated MAGGIE motif
chr10:29872878_T_C	chr10	29872778	29872978	+	0.33958499999999997	2.2707726673255606e-13	mutated MAGGIE motif
chr10:29873067_A_G	chr10	29872967	29873167	+	0.16964899999999994	0.00303925667153996	mutated MAGGIE motif
chr10:29874104_T_C	chr10	29874004	29874204	+	0.292816	3.5126177436895602e-09	mutated MAGGIE motif
chr10:29874249_A_G	chr10	29874149	29874349	+	0.15436800000000006	0.00373782065081452	mutated MAGGIE motif
chr10:29874342_T_C	chr10	29874242	29874442	+	0.28816600000000003	6.072777984738821e-09	mutated MAGGIE motif
chr10:29874560_C_A	chr10	29874460	29874660	+	0.15801099999999998	0.00373782065081452	mutated MAGGIE motif
chr10:29874633_G_A	chr10	29874533	29874733	+	0.12989300000000004	0.0119842357792598	mutated MAGGIE motif
chr10:3086486_A_C	chr10	3086386	3086586	+	0.157933	0.000865039038779488	mutated MAGGIE motif
chr10:3089201_CCACCACAGAG_C	chr10	3089101	3089301	+	0.13151199999999996	0.00897886416355365	mutated MAGGIE motif
chr10:3089213_TG_T	chr10	3089113	3089313	+	0.13151199999999996	0.00897886416355365	mutated MAGGIE motif
chr10:3089231_G_A	chr10	3089131	3089331	+	0.131382	0.00897886416355365	mutated MAGGIE motif
chr10:3089263_G_A	chr10	3089163	3089363	+	0.13131400000000004	0.00897886416355365	mutated MAGGIE motif
chr10:3089339_T_C	chr10	3089239	3089439	+	0.10596199999999999	0.0116726695837983	mutated MAGGIE motif
chr10:3089363_A_G	chr10	3089263	3089463	+	0.09394399999999993	0.0190724250236993	mutated MAGGIE motif
chr10:3089414_G_A	chr10	3089314	3089514	+	0.10522399999999997	0.0116726695837983	mutated MAGGIE motif
chr10:3089524_T_G	chr10	3089424	3089624	+	0.11781300000000006	0.0190724250236993	mutated MAGGIE motif
chr10:3091062_G_C	chr10	3090962	3091162	+	0.13101500000000002	0.0116726695837983	mutated MAGGIE motif
chr10:3091446_C_T	chr10	3091346	3091546	+	0.10522900000000003	0.0186421398692995	mutated MAGGIE motif
chr10:3091465_T_C	chr10	3091365	3091565	+	0.11506000000000005	0.0190724250236993	mutated MAGGIE motif
chr10:3091504_A_G	chr10	3091404	3091604	+	0.11555899999999995	0.00897886416355365	mutated MAGGIE motif
chr10:3095281_C_A	chr10	3095181	3095381	+	0.17223599999999994	0.0249175500977148	mutated MAGGIE motif
chr10:31100130_G_C	chr10	31100030	31100230	+	0.04437800000000003	3.06359848086524e-05	mutated MAGGIE motif
chr10:31100264_C_T	chr10	31100164	31100364	+	0.046381000000000006	3.06359848086524e-05	mutated MAGGIE motif
chr10:31100512_TAC_T	chr10	31100412	31100612	+	0.18940200000000007	1.8927256021721298e-06	mutated MAGGIE motif
chr10:31101311_A_G	chr10	31101211	31101411	+	0.045929000000000005	3.06359848086524e-05	mutated MAGGIE motif
chr10:31101953_G_A	chr10	31101853	31102053	+	-0.050537	3.46327026951824e-05	mutated MAGGIE motif
chr10:31102194_C_T	chr10	31102094	31102294	+	-0.05044199999999999	3.46327026951824e-05	mutated MAGGIE motif
chr10:31102668_T_A	chr10	31102568	31102768	+	-0.05790200000000008	0.00023751250111363705	mutated MAGGIE motif
chr10:31104120_A_G	chr10	31104020	31104220	+	-0.048910000000000016	3.5645034812483505e-05	mutated MAGGIE motif
chr10:31104540_T_C	chr10	31104440	31104640	+	-0.049047000000000014	3.5645034812483505e-05	mutated MAGGIE motif
chr10:31105451_T_C	chr10	31105351	31105551	+	-0.050601000000000014	3.46327026951824e-05	mutated MAGGIE motif
chr10:31106038_G_A	chr10	31105938	31106138	+	-0.051004	3.5645034812483505e-05	mutated MAGGIE motif
chr10:31106093_TG_T	chr10	31105993	31106193	+	-0.051985999999999984	3.5645034812483505e-05	mutated MAGGIE motif
chr10:31106889_C_T	chr10	31106789	31106989	+	-0.053226	3.46327026951824e-05	mutated MAGGIE motif
chr10:31107478_G_A	chr10	31107378	31107578	+	-0.05461099999999997	3.46327026951824e-05	mutated MAGGIE motif
chr10:31107598_G_A	chr10	31107498	31107698	+	-0.05981300000000001	0.000116908602047319	mutated MAGGIE motif
chr10:31107705_A_C	chr10	31107605	31107805	+	-0.05399899999999997	3.06359848086524e-05	mutated MAGGIE motif
chr10:31108051_T_C	chr10	31107951	31108151	+	-0.02507799999999999	0.04022902848877	mutated MAGGIE motif
chr10:31108158_C_T	chr10	31108058	31108258	+	-0.05416700000000002	3.06359848086524e-05	mutated MAGGIE motif
chr10:31108191_G_A	chr10	31108091	31108291	+	-0.054232999999999976	3.06359848086524e-05	mutated MAGGIE motif
chr10:31108595_A_G	chr10	31108495	31108695	+	-0.029652000000000067	0.0164283501526125	mutated MAGGIE motif
chr10:31108764_A_G	chr10	31108664	31108864	+	-0.159891	8.6996468800641e-06	mutated MAGGIE motif
chr10:31109456_G_A	chr10	31109356	31109556	+	-0.060859	3.06359848086524e-05	mutated MAGGIE motif
chr10:31109836_A_T	chr10	31109736	31109936	+	0.033513000000000015	0.0471393082454627	mutated MAGGIE motif
chr10:31110135_T_C	chr10	31110035	31110235	+	-0.059566999999999974	0.000285613639392314	mutated MAGGIE motif
chr10:31111110_G_A	chr10	31111010	31111210	+	-0.054618999999999966	3.06359848086524e-05	mutated MAGGIE motif
chr10:31112495_A_G	chr10	31112395	31112595	+	0.026972	0.0471393082454627	mutated MAGGIE motif
chr10:31113242_C_T	chr10	31113142	31113342	+	-0.06969500000000001	1.95888038226904e-05	mutated MAGGIE motif
chr10:3147096_C_G	chr10	3146996	3147196	+	0.140799	0.047929473340988	mutated MAGGIE motif
chr10:3147099_G_A	chr10	3146999	3147199	+	0.14083900000000005	0.047929473340988	mutated MAGGIE motif
chr10:3147192_G_A	chr10	3147092	3147292	+	0.14407099999999995	0.047929473340988	mutated MAGGIE motif
chr10:3178214_G_T	chr10	3178114	3178314	+	-0.232302	3.95373136880696e-08	mutated MAGGIE motif
chr10:3178308_G_T	chr10	3178208	3178408	+	-0.232302	3.95373136880696e-08	mutated MAGGIE motif
chr10:3178383_G_T	chr10	3178283	3178483	+	-0.215144	1.54806194431474e-06	mutated MAGGIE motif
chr10:3178433_G_A	chr10	3178333	3178533	+	0.24632800000000002	1.18487597869963e-09	mutated MAGGIE motif
chr10:3178815_G_C	chr10	3178715	3178915	+	-0.186924	0.0008765464346651152	mutated MAGGIE motif
chr10:3178865_G_A	chr10	3178765	3178965	+	-0.197972	0.0025288074232859697	mutated MAGGIE motif
chr10:3178881_C_T	chr10	3178781	3178981	+	0.24633700000000006	1.18487597869963e-09	mutated MAGGIE motif
chr10:3178908_T_C	chr10	3178808	3179008	+	-0.24348899999999998	1.4493254114960195e-07	mutated MAGGIE motif
chr10:3178915_C_T	chr10	3178815	3179015	+	0.2463420000000001	1.18487597869963e-09	mutated MAGGIE motif
chr10:3178964_GAATT_G	chr10	3178864	3179064	+	-0.22528400000000004	2.15392456194607e-06	mutated MAGGIE motif
chr10:3178986_T_C	chr10	3178886	3179086	+	-0.23226100000000002	3.95373136880696e-08	mutated MAGGIE motif
chr10:3178987_G_A	chr10	3178887	3179087	+	-0.232256	3.95373136880696e-08	mutated MAGGIE motif
chr10:3179079_AAAGATTAGCAAAATATTTTTATAGGGATCACTG_A	chr10	3178979	3179179	+	-0.24348899999999998	1.4493254114960195e-07	mutated MAGGIE motif
chr10:3179189_A_G	chr10	3179089	3179289	+	-0.249338	6.62852341119997e-08	mutated MAGGIE motif
chr10:3179446_C_G	chr10	3179346	3179546	+	-0.23174	5.57051188168159e-08	mutated MAGGIE motif
chr10:3179703_C_T	chr10	3179603	3179803	+	-0.23927	2.02971813152029e-08	mutated MAGGIE motif
chr10:3179708_A_G	chr10	3179608	3179808	+	-0.239298	2.02971813152029e-08	mutated MAGGIE motif
chr10:31997371_A_G	chr10	31997271	31997471	+	0.11592200000000008	0.0149394019337988	mutated MAGGIE motif
chr10:31997400_G_T	chr10	31997300	31997500	+	0.1157729999999999	0.0149394019337988	mutated MAGGIE motif
chr10:31997937_C_T	chr10	31997837	31998037	+	0.11623199999999999	0.0149394019337988	mutated MAGGIE motif
chr10:31997983_G_C	chr10	31997883	31998083	+	0.12483699999999998	0.000971206047943051	mutated MAGGIE motif
chr10:31998017_A_G	chr10	31997917	31998117	+	0.09314999999999997	0.0149394019337988	mutated MAGGIE motif
chr10:32345504_C_A	chr10	32345404	32345604	+	0.14702399999999993	0.04990112723813599	mutated MAGGIE motif
chr10:32345736_C_G	chr10	32345636	32345836	+	0.144536	0.0216976086170646	mutated MAGGIE motif
chr10:32635971_G_C	chr10	32635871	32636071	+	-0.07874099999999999	0.0404513339530619	mutated MAGGIE motif
chr10:33165422_G_A	chr10	33165322	33165522	+	0.30070299999999994	0.00143444767726686	mutated MAGGIE motif
chr10:33466519_T_C	chr10	33466419	33466619	+	0.127066	0.0019963402171074107	mutated MAGGIE motif
chr10:35019671_C_T	chr10	35019571	35019771	+	0.16157500000000002	7.63153629089766e-05	mutated MAGGIE motif
chr10:35020006_T_G	chr10	35019906	35020106	+	0.171941	2.60603125052334e-05	mutated MAGGIE motif
chr10:35021483_G_A	chr10	35021383	35021583	+	0.17189700000000008	2.60603125052334e-05	mutated MAGGIE motif
chr10:35022490_C_G	chr10	35022390	35022590	+	0.17181999999999994	2.60603125052334e-05	mutated MAGGIE motif
chr10:35512799_T_C	chr10	35512699	35512899	+	-0.14155100000000004	0.00292720774995295	mutated MAGGIE motif
chr10:35513323_G_A	chr10	35513223	35513423	+	-0.20723800000000006	2.19978996220768e-05	mutated MAGGIE motif
chr10:35514327_C_T	chr10	35514227	35514427	+	-0.206098	2.19978996220768e-05	mutated MAGGIE motif
chr10:36735265_G_A	chr10	36735165	36735365	+	0.132548	0.000657497471009732	mutated MAGGIE motif
chr10:36737480_G_A	chr10	36737380	36737580	+	-0.15009699999999998	0.0495952209713802	mutated MAGGIE motif
chr10:36739003_A_AC	chr10	36738903	36739103	+	0.23222600000000004	1.98830533633025e-09	mutated MAGGIE motif
chr10:36740036_C_G	chr10	36739936	36740136	+	0.22696400000000005	2.56801737790653e-09	mutated MAGGIE motif
chr10:36740316_C_A	chr10	36740216	36740416	+	-0.15381199999999998	0.0158116330078843	mutated MAGGIE motif
chr10:36741255_A_G	chr10	36741155	36741355	+	-0.226926	2.56801737790653e-09	mutated MAGGIE motif
chr10:36742014_C_G	chr10	36741914	36742114	+	-0.232056	1.98830533633025e-09	mutated MAGGIE motif
chr10:36744116_C_T	chr10	36744016	36744216	+	-0.16354100000000002	0.000101055855338526	mutated MAGGIE motif
chr10:36777576_A_G	chr10	36777476	36777676	+	-0.06429799999999998	0.0289958026824742	mutated MAGGIE motif
chr10:36778150_A_G	chr10	36778050	36778250	+	0.050483999999999966	0.0414344258715179	mutated MAGGIE motif
chr10:36780587_A_G	chr10	36780487	36780687	+	-0.06216300000000001	0.0289958026824742	mutated MAGGIE motif
chr10:36780764_C_A	chr10	36780664	36780864	+	0.05155900000000002	0.0414344258715179	mutated MAGGIE motif
chr10:38383147_A_T	chr10	38383047	38383247	+	0.202481	0.0163079814207412	mutated MAGGIE motif
chr10:3848340_A_G	chr10	3848240	3848440	+	0.03633699999999995	0.040660766686686	mutated MAGGIE motif
chr10:3849241_C_A	chr10	3849141	3849341	+	0.066446	0.00227607474164073	mutated MAGGIE motif
chr10:3850303_G_T	chr10	3850203	3850403	+	0.060410999999999986	0.00337624094710421	mutated MAGGIE motif
chr10:3850780_C_T	chr10	3850680	3850880	+	0.06271099999999996	0.00235144582348685	mutated MAGGIE motif
chr10:3919001_C_T	chr10	3918901	3919101	+	0.13161199999999995	0.00252072818275685	mutated MAGGIE motif
chr10:3919081_G_A	chr10	3918981	3919181	+	0.13167700000000004	0.00252072818275685	mutated MAGGIE motif
chr10:3919765_T_C	chr10	3919665	3919865	+	0.13182899999999995	0.00252072818275685	mutated MAGGIE motif
chr10:3965284_G_A	chr10	3965184	3965384	+	-0.09689299999999999	0.000289916640832205	mutated MAGGIE motif
chr10:3965302_C_T	chr10	3965202	3965402	+	-0.096854	0.000289916640832205	mutated MAGGIE motif
chr10:3965342_C_G	chr10	3965242	3965442	+	-0.096889	0.000289916640832205	mutated MAGGIE motif
chr10:3965527_T_C	chr10	3965427	3965627	+	-0.09688400000000004	0.000289916640832205	mutated MAGGIE motif
chr10:3965700_T_A	chr10	3965600	3965800	+	-0.09687800000000002	0.000289916640832205	mutated MAGGIE motif
chr10:3965722_T_C	chr10	3965622	3965822	+	-0.09685900000000004	0.000289916640832205	mutated MAGGIE motif
chr10:3965873_A_ATTTATTTC	chr10	3965773	3965973	+	-0.09689299999999999	0.000289916640832205	mutated MAGGIE motif
chr10:3966099_C_A	chr10	3965999	3966199	+	-0.09688800000000004	0.000289916640832205	mutated MAGGIE motif
chr10:3966204_A_C	chr10	3966104	3966304	+	-0.096904	0.000289916640832205	mutated MAGGIE motif
chr10:3966519_G_C	chr10	3966419	3966619	+	-0.096852	0.000289916640832205	mutated MAGGIE motif
chr10:3966869_A_G	chr10	3966769	3966969	+	-0.09698600000000003	0.000289916640832205	mutated MAGGIE motif
chr10:3967206_C_A	chr10	3967106	3967306	+	-0.096887	0.000289916640832205	mutated MAGGIE motif
chr10:3968152_C_G	chr10	3968052	3968252	+	-0.09689799999999997	0.000289916640832205	mutated MAGGIE motif
chr10:3968210_C_T	chr10	3968110	3968310	+	0.07918400000000002	0.0032115542864417693	mutated MAGGIE motif
chr10:3968427_G_A	chr10	3968327	3968527	+	-0.09692499999999997	0.000289916640832205	mutated MAGGIE motif
chr10:3968438_A_G	chr10	3968338	3968538	+	0.07916800000000003	0.0032115542864417693	mutated MAGGIE motif
chr10:3968443_G_C	chr10	3968343	3968543	+	-0.096879	0.000289916640832205	mutated MAGGIE motif
chr10:3968654_C_T	chr10	3968554	3968754	+	-0.09687600000000003	0.000289916640832205	mutated MAGGIE motif
chr10:3968713_A_C	chr10	3968613	3968813	+	-0.096758	0.000289916640832205	mutated MAGGIE motif
chr10:3968877_T_C	chr10	3968777	3968977	+	0.07912600000000003	0.0032115542864417693	mutated MAGGIE motif
chr10:3969047_G_A	chr10	3968947	3969147	+	-0.09699800000000004	0.000289916640832205	mutated MAGGIE motif
chr10:3969235_C_T	chr10	3969135	3969335	+	-0.096787	0.000289916640832205	mutated MAGGIE motif
chr10:3969587_A_G	chr10	3969487	3969687	+	-0.09690900000000002	0.000289916640832205	mutated MAGGIE motif
chr10:3969648_C_T	chr10	3969548	3969748	+	-0.09689599999999997	0.000289916640832205	mutated MAGGIE motif
chr10:3969708_T_C	chr10	3969608	3969808	+	-0.09672399999999998	0.000289916640832205	mutated MAGGIE motif
chr10:3969947_T_C	chr10	3969847	3970047	+	-0.09689299999999999	0.000289916640832205	mutated MAGGIE motif
chr10:3969963_C_T	chr10	3969863	3970063	+	-0.09689000000000003	0.000289916640832205	mutated MAGGIE motif
chr10:3970062_C_T	chr10	3969962	3970162	+	-0.096902	0.000289916640832205	mutated MAGGIE motif
chr10:3970778_C_T	chr10	3970678	3970878	+	-0.201024	8.104628904056591e-10	mutated MAGGIE motif
chr10:3971037_G_C	chr10	3970937	3971137	+	0.247829	3.0382641492703e-11	mutated MAGGIE motif
chr10:3971046_C_T	chr10	3970946	3971146	+	-0.198072	1.45402755890635e-09	mutated MAGGIE motif
chr10:3971047_A_C	chr10	3970947	3971147	+	0.247827	3.0382641492703e-11	mutated MAGGIE motif
chr10:3971222_C_T	chr10	3971122	3971322	+	0.24782600000000002	3.0382641492703e-11	mutated MAGGIE motif
chr10:3971367_T_C	chr10	3971267	3971467	+	0.2478090000000001	3.0382641492703e-11	mutated MAGGIE motif
chr10:3971439_G_A	chr10	3971339	3971539	+	0.2478090000000001	3.0382641492703e-11	mutated MAGGIE motif
chr10:3971588_C_T	chr10	3971488	3971688	+	0.247848	3.0382641492703e-11	mutated MAGGIE motif
chr10:3971739_G_T	chr10	3971639	3971839	+	0.247838	3.0382641492703e-11	mutated MAGGIE motif
chr10:3971879_C_T	chr10	3971779	3971979	+	0.247837	3.0382641492703e-11	mutated MAGGIE motif
chr10:3971991_G_A	chr10	3971891	3972091	+	0.247842	3.0382641492703e-11	mutated MAGGIE motif
chr10:3972077_T_C	chr10	3971977	3972177	+	0.2478020000000001	3.0382641492703e-11	mutated MAGGIE motif
chr10:3972090_G_A	chr10	3971990	3972190	+	0.247821	3.0382641492703e-11	mutated MAGGIE motif
chr10:3972277_T_C	chr10	3972177	3972377	+	0.24787099999999995	3.0382641492703e-11	mutated MAGGIE motif
chr10:3972524_C_T	chr10	3972424	3972624	+	0.22265100000000004	6.263368062981781e-08	mutated MAGGIE motif
chr10:3972661_C_T	chr10	3972561	3972761	+	0.223309	6.41219766461758e-08	mutated MAGGIE motif
chr10:3972665_C_G	chr10	3972565	3972765	+	0.223309	6.41219766461758e-08	mutated MAGGIE motif
chr10:3972707_T_C	chr10	3972607	3972807	+	0.223892	6.41219766461758e-08	mutated MAGGIE motif
chr10:3972952_A_G	chr10	3972852	3973052	+	0.22323600000000002	6.09934267641997e-08	mutated MAGGIE motif
chr10:43896207_C_T	chr10	43896107	43896307	+	0.05603400000000003	0.0303409508188175	mutated MAGGIE motif
chr10:43896339_G_GTCGAGACCATCCTA	chr10	43896239	43896439	+	0.06587299999999996	0.0208900668373972	mutated MAGGIE motif
chr10:43897470_T_C	chr10	43897370	43897570	+	0.06579799999999991	0.0208900668373972	mutated MAGGIE motif
chr10:43899578_C_T	chr10	43899478	43899678	+	0.05600099999999997	0.0303409508188175	mutated MAGGIE motif
chr10:43899748_A_C	chr10	43899648	43899848	+	0.06540500000000005	0.0208900668373972	mutated MAGGIE motif
chr10:43901864_G_A	chr10	43901764	43901964	+	0.056068000000000014	0.0303409508188175	mutated MAGGIE motif
chr10:43901973_T_A	chr10	43901873	43902073	+	-0.06586400000000002	0.0208900668373972	mutated MAGGIE motif
chr10:43903919_T_A	chr10	43903819	43904019	+	-0.055406999999999984	0.0303409508188175	mutated MAGGIE motif
chr10:45064423_C_A	chr10	45064323	45064523	+	-0.07557900000000001	0.0469587110353223	mutated MAGGIE motif
chr10:45065440_C_T	chr10	45065340	45065540	+	-0.07510699999999998	0.0469587110353223	mutated MAGGIE motif
chr10:45248254_C_T	chr10	45248154	45248354	+	0.151219	0.00123907191756191	mutated MAGGIE motif
chr10:45248484_T_C	chr10	45248384	45248584	+	-0.168074	4.85029129495819e-05	mutated MAGGIE motif
chr10:45248711_T_A	chr10	45248611	45248811	+	-0.15115300000000004	0.00123907191756191	mutated MAGGIE motif
chr10:45248816_A_G	chr10	45248716	45248916	+	-0.155866	0.000170610567789506	mutated MAGGIE motif
chr10:4846641_C_CT	chr10	4846541	4846741	+	-0.03729499999999997	0.0253211428132788	mutated MAGGIE motif
chr10:4847017_A_G	chr10	4846917	4847117	+	-0.037272999999999945	0.0253211428132788	mutated MAGGIE motif
chr10:4847241_C_T	chr10	4847141	4847341	+	-0.038685999999999936	0.0253211428132788	mutated MAGGIE motif
chr10:4847511_T_C	chr10	4847411	4847611	+	-0.030930000000000013	0.0253211428132788	mutated MAGGIE motif
chr10:4847645_T_C	chr10	4847545	4847745	+	-0.038736999999999966	0.0253211428132788	mutated MAGGIE motif
chr10:4850173_C_T	chr10	4850073	4850273	+	0.02854699999999999	0.0253211428132788	mutated MAGGIE motif
chr10:4851243_C_T	chr10	4851143	4851343	+	-0.042057999999999984	0.0253211428132788	mutated MAGGIE motif
chr10:4852869_T_C	chr10	4852769	4852969	+	0.036676000000000035	0.0253211428132788	mutated MAGGIE motif
chr10:4853709_C_A	chr10	4853609	4853809	+	-0.042134000000000005	0.0253211428132788	mutated MAGGIE motif
chr10:4854229_G_A	chr10	4854129	4854329	+	0.03892700000000005	0.0253211428132788	mutated MAGGIE motif
chr10:4854393_C_T	chr10	4854293	4854493	+	-0.04212200000000005	0.0253211428132788	mutated MAGGIE motif
chr10:4855051_T_C	chr10	4854951	4855151	+	-0.042065999999999985	0.0253211428132788	mutated MAGGIE motif
chr10:4856831_C_A	chr10	4856731	4856931	+	-0.042177999999999986	0.0253211428132788	mutated MAGGIE motif
chr10:4857513_C_T	chr10	4857413	4857613	+	-0.03944599999999998	0.0283804602242166	mutated MAGGIE motif
chr10:4899590_A_AC	chr10	4899490	4899690	+	0.183862	0.012764555950548	mutated MAGGIE motif
chr10:4899686_A_C	chr10	4899586	4899786	+	0.183925	0.012764555950548	mutated MAGGIE motif
chr10:4900138_A_G	chr10	4900038	4900238	+	0.183801	0.012764555950548	mutated MAGGIE motif
chr10:4900320_T_C	chr10	4900220	4900420	+	0.18385	0.012764555950548	mutated MAGGIE motif
chr10:4901156_C_T	chr10	4901056	4901256	+	0.183862	0.012764555950548	mutated MAGGIE motif
chr10:4901798_G_T	chr10	4901698	4901898	+	0.18398500000000007	0.012764555950548	mutated MAGGIE motif
chr10:4901835_G_A	chr10	4901735	4901935	+	0.18372200000000005	0.012764555950548	mutated MAGGIE motif
chr10:4901931_G_A	chr10	4901831	4902031	+	0.183909	0.012764555950548	mutated MAGGIE motif
chr10:4907984_T_C	chr10	4907884	4908084	+	0.073291	0.0376712003912891	mutated MAGGIE motif
chr10:4908624_C_T	chr10	4908524	4908724	+	0.07244300000000004	0.0376712003912891	mutated MAGGIE motif
chr10:4908655_T_G	chr10	4908555	4908755	+	-0.14506399999999994	3.4125481613701e-07	mutated MAGGIE motif
chr10:4908745_C_T	chr10	4908645	4908845	+	0.07354700000000003	0.0376712003912891	mutated MAGGIE motif
chr10:4908818_G_A	chr10	4908718	4908918	+	0.07210099999999997	0.0376712003912891	mutated MAGGIE motif
chr10:4908929_A_T	chr10	4908829	4909029	+	0.07118100000000005	0.0376712003912891	mutated MAGGIE motif
chr10:4909074_A_T	chr10	4908974	4909174	+	0.07447399999999993	0.0376712003912891	mutated MAGGIE motif
chr10:4909113_A_G	chr10	4909013	4909213	+	0.06923599999999996	0.0376712003912891	mutated MAGGIE motif
chr10:4909149_G_A	chr10	4909049	4909249	+	0.07047000000000002	0.0376712003912891	mutated MAGGIE motif
chr10:4909353_A_G	chr10	4909253	4909453	+	0.07103199999999997	0.0376712003912891	mutated MAGGIE motif
chr10:4909401_T_C	chr10	4909301	4909501	+	0.07269999999999999	0.0376712003912891	mutated MAGGIE motif
chr10:4909547_C_T	chr10	4909447	4909647	+	0.06745400000000001	0.0376712003912891	mutated MAGGIE motif
chr10:4909968_T_C	chr10	4909868	4910068	+	-0.18574300000000002	2.59364681777007e-17	mutated MAGGIE motif
chr10:4910028_C_A	chr10	4909928	4910128	+	0.07030200000000009	0.0376712003912891	mutated MAGGIE motif
chr10:4910219_G_A	chr10	4910119	4910319	+	0.07767100000000005	0.0376712003912891	mutated MAGGIE motif
chr10:4910493_C_A	chr10	4910393	4910593	+	0.06848299999999996	0.0379685775770254	mutated MAGGIE motif
chr10:4910690_G_A	chr10	4910590	4910790	+	0.07225100000000008	0.0376712003912891	mutated MAGGIE motif
chr10:4911599_C_T	chr10	4911499	4911699	+	0.07345100000000004	0.0376712003912891	mutated MAGGIE motif
chr10:4911616_G_A	chr10	4911516	4911716	+	0.07274999999999998	0.0376712003912891	mutated MAGGIE motif
chr10:50155130_C_T	chr10	50155030	50155230	+	-0.06383199999999994	0.0331775683081349	mutated MAGGIE motif
chr10:50155369_T_C	chr10	50155269	50155469	+	0.064446	0.0331775683081349	mutated MAGGIE motif
chr10:50391910_A_G	chr10	50391810	50392010	+	0.222156	9.6495708969676e-05	mutated MAGGIE motif
chr10:50392254_C_T	chr10	50392154	50392354	+	0.221905	9.6495708969676e-05	mutated MAGGIE motif
chr10:50392395_A_T	chr10	50392295	50392495	+	-0.15402500000000002	0.012333349740682	mutated MAGGIE motif
chr10:5060875_G_A	chr10	5060775	5060975	+	-0.13243	0.0139808336686853	mutated MAGGIE motif
chr10:5061541_G_A	chr10	5061441	5061641	+	-0.208742	2.88917923862862e-05	mutated MAGGIE motif
chr10:5062212_G_A	chr10	5062112	5062312	+	-0.20804	2.88917923862862e-05	mutated MAGGIE motif
chr10:5063382_C_A	chr10	5063282	5063482	+	-0.197246	5.07956992419841e-05	mutated MAGGIE motif
chr10:5063398_T_G	chr10	5063298	5063498	+	-0.11360599999999997	0.0192219040698218	mutated MAGGIE motif
chr10:5063817_T_C	chr10	5063717	5063917	+	0.13807599999999998	0.00674651996487529	mutated MAGGIE motif
chr10:5063944_C_T	chr10	5063844	5064044	+	0.173215	0.00011897952947495501	mutated MAGGIE motif
chr10:5064340_T_G	chr10	5064240	5064440	+	0.208438	2.3720950049471696e-05	mutated MAGGIE motif
chr10:5064516_T_C	chr10	5064416	5064616	+	-0.120238	0.00936404390075319	mutated MAGGIE motif
chr10:5064517_A_G	chr10	5064417	5064617	+	-0.12023699999999997	0.00936404390075319	mutated MAGGIE motif
chr10:5064811_C_A	chr10	5064711	5064911	+	-0.12018800000000003	0.00936404390075319	mutated MAGGIE motif
chr10:5065008_T_A	chr10	5064908	5065108	+	-0.124724	0.00936404390075319	mutated MAGGIE motif
chr10:5065166_C_T	chr10	5065066	5065266	+	-0.210829	2.88917923862862e-05	mutated MAGGIE motif
chr10:5065248_C_T	chr10	5065148	5065348	+	0.15883699999999998	0.00081953493814262	mutated MAGGIE motif
chr10:5074026_A_C	chr10	5073926	5074126	+	0.16507499999999994	0.00803202738648265	mutated MAGGIE motif
chr10:5074026_A_G	chr10	5073926	5074126	+	-0.206337	0.000714238666255896	mutated MAGGIE motif
chr10:50742353_T_C	chr10	50742253	50742453	+	0.08089799999999991	0.0154999240599176	mutated MAGGIE motif
chr10:50742892_A_G	chr10	50742792	50742992	+	-0.09022399999999996	0.0154999240599176	mutated MAGGIE motif
chr10:5074777_G_A	chr10	5074677	5074877	+	0.16509200000000002	0.00803202738648265	mutated MAGGIE motif
chr10:5074888_A_G	chr10	5074788	5074988	+	-0.263183	2.02760580158874e-06	mutated MAGGIE motif
chr10:5074975_G_A	chr10	5074875	5075075	+	0.16520500000000005	0.00803202738648265	mutated MAGGIE motif
chr10:5075014_C_T	chr10	5074914	5075114	+	-0.263183	2.02760580158874e-06	mutated MAGGIE motif
chr10:5075015_A_G	chr10	5074915	5075115	+	-0.154196	0.00930183950984896	mutated MAGGIE motif
chr10:5075057_A_G	chr10	5074957	5075157	+	-0.154196	0.00930183950984896	mutated MAGGIE motif
chr10:5075061_T_C	chr10	5074961	5075161	+	-0.154196	0.00930183950984896	mutated MAGGIE motif
chr10:5075121_C_G	chr10	5075021	5075221	+	-0.309723	2.2552957718084101e-07	mutated MAGGIE motif
chr10:5075493_G_A	chr10	5075393	5075593	+	-0.15330900000000006	0.00930183950984896	mutated MAGGIE motif
chr10:5075724_T_A	chr10	5075624	5075824	+	-0.307114	7.81442672860632e-08	mutated MAGGIE motif
chr10:5075827_G_T	chr10	5075727	5075927	+	0.165088	0.00803202738648265	mutated MAGGIE motif
chr10:5076063_G_A	chr10	5075963	5076163	+	-0.307214	7.81442672860632e-08	mutated MAGGIE motif
chr10:5076450_T_C	chr10	5076350	5076550	+	0.16520500000000005	0.00803202738648265	mutated MAGGIE motif
chr10:5076585_G_A	chr10	5076485	5076685	+	0.16501100000000002	0.00803202738648265	mutated MAGGIE motif
chr10:5147579_A_G	chr10	5147479	5147679	+	-0.311889	3.27488721828805e-11	mutated MAGGIE motif
chr10:5147909_G_A	chr10	5147809	5148009	+	-0.312255	2.2639608262488395e-13	mutated MAGGIE motif
chr10:5148387_T_C	chr10	5148287	5148487	+	0.383966	8.31397052125077e-26	mutated MAGGIE motif
chr10:5148453_C_T	chr10	5148353	5148553	+	0.3857290000000001	3.19697128733496e-25	mutated MAGGIE motif
chr10:5148669_G_A	chr10	5148569	5148769	+	0.3706510000000001	2.3177281925440305e-23	mutated MAGGIE motif
chr10:5148766_A_C	chr10	5148666	5148866	+	0.3837290000000001	8.31397052125077e-26	mutated MAGGIE motif
chr10:5148923_A_G	chr10	5148823	5149023	+	0.24892000000000006	0.000128620756939879	mutated MAGGIE motif
chr10:5149105_TA_T	chr10	5149005	5149205	+	0.38374	8.31397052125077e-26	mutated MAGGIE motif
chr10:5149106_A_AAAT	chr10	5149006	5149206	+	-0.38374	8.31397052125077e-26	mutated MAGGIE motif
chr10:5149303_T_C	chr10	5149203	5149403	+	-0.307503	4.80158606845048e-11	mutated MAGGIE motif
chr10:5149330_A_G	chr10	5149230	5149430	+	0.383783	8.31397052125077e-26	mutated MAGGIE motif
chr10:5149413_T_C	chr10	5149313	5149513	+	-0.307824	4.80158606845048e-11	mutated MAGGIE motif
chr10:5149427_TTG_CTG	chr10	5149327	5149527	+	-0.306713	4.93133957114754e-11	mutated MAGGIE motif
chr10:5149703_G_A	chr10	5149603	5149803	+	-0.31309000000000003	2.2303413229018305e-13	mutated MAGGIE motif
chr10:5150019_T_TGTAA	chr10	5149919	5150119	+	-0.311607	3.27488721828805e-11	mutated MAGGIE motif
chr10:5150398_G_A	chr10	5150298	5150498	+	-0.311634	3.27488721828805e-11	mutated MAGGIE motif
chr10:52363203_T_A	chr10	52363103	52363303	+	-0.263527	8.30405496245427e-08	mutated MAGGIE motif
chr10:52363339_T_G	chr10	52363239	52363439	+	-0.138252	0.00535932608825384	mutated MAGGIE motif
chr10:52363705_C_T	chr10	52363605	52363805	+	-0.233375	8.863315036818009e-07	mutated MAGGIE motif
chr10:52364273_C_T	chr10	52364173	52364373	+	-0.11909899999999995	0.0159783978220105	mutated MAGGIE motif
chr10:52364496_C_T	chr10	52364396	52364596	+	-0.26364099999999996	8.30405496245427e-08	mutated MAGGIE motif
chr10:52364614_GAAATAT_G	chr10	52364514	52364714	+	-0.263586	8.30405496245427e-08	mutated MAGGIE motif
chr10:52364756_G_A	chr10	52364656	52364856	+	-0.23298	8.863315036818009e-07	mutated MAGGIE motif
chr10:52365541_C_G	chr10	52365441	52365641	+	-0.160972	0.00111031635567676	mutated MAGGIE motif
chr10:52365860_A_C	chr10	52365760	52365960	+	-0.192168	3.3334568003834996e-05	mutated MAGGIE motif
chr10:52365992_T_G	chr10	52365892	52366092	+	-0.11809400000000005	0.0210864494155495	mutated MAGGIE motif
chr10:52749163_A_G	chr10	52749063	52749263	+	0.06661600000000001	0.00910420226221967	mutated MAGGIE motif
chr10:52751951_T_C	chr10	52751851	52752051	+	0.06519700000000006	0.0118156805083558	mutated MAGGIE motif
chr10:52751960_A_G	chr10	52751860	52752060	+	0.07292700000000008	0.0056076081813964	mutated MAGGIE motif
chr10:52752471_C_T	chr10	52752371	52752571	+	0.08662999999999997	0.0016345451224421901	mutated MAGGIE motif
chr10:52752731_C_T	chr10	52752631	52752831	+	0.08663100000000001	0.0016345451224421901	mutated MAGGIE motif
chr10:52753763_T_C	chr10	52753663	52753863	+	0.08634600000000002	0.0016345451224421901	mutated MAGGIE motif
chr10:52753916_G_T	chr10	52753816	52754016	+	0.08663100000000001	0.0016345451224421901	mutated MAGGIE motif
chr10:52755689_A_G	chr10	52755589	52755789	+	0.08654499999999997	0.0016345451224421901	mutated MAGGIE motif
chr10:52756339_G_A	chr10	52756239	52756439	+	0.07927200000000001	0.0021251621341177107	mutated MAGGIE motif
chr10:52756901_G_A	chr10	52756801	52757001	+	0.07931199999999994	0.0021251621341177107	mutated MAGGIE motif
chr10:52757269_A_G	chr10	52757169	52757369	+	0.07930000000000004	0.0021251621341177107	mutated MAGGIE motif
chr10:52758221_G_C	chr10	52758121	52758321	+	0.07930899999999996	0.0021251621341177107	mutated MAGGIE motif
chr10:52758504_T_C	chr10	52758404	52758604	+	0.08766300000000005	0.0016345451224421901	mutated MAGGIE motif
chr10:52758948_A_G	chr10	52758848	52759048	+	0.07930500000000007	0.0021251621341177107	mutated MAGGIE motif
chr10:52759323_A_G	chr10	52759223	52759423	+	0.07927799999999996	0.0021251621341177107	mutated MAGGIE motif
chr10:52759553_T_G	chr10	52759453	52759653	+	0.07930000000000004	0.0021251621341177107	mutated MAGGIE motif
chr10:52759723_A_G	chr10	52759623	52759823	+	0.07930700000000003	0.0021251621341177107	mutated MAGGIE motif
chr10:52761805_CAA_C	chr10	52761705	52761905	+	0.07645800000000003	0.00273532216885187	mutated MAGGIE motif
chr10:52761966_A_G	chr10	52761866	52762066	+	0.07652700000000001	0.00273532216885187	mutated MAGGIE motif
chr10:53444658_T_C	chr10	53444558	53444758	+	0.12962600000000002	0.0356783410984321	mutated MAGGIE motif
chr10:53445153_C_T	chr10	53445053	53445253	+	0.125541	0.0356783410984321	mutated MAGGIE motif
chr10:53677313_G_A	chr10	53677213	53677413	+	0.220214	4.66756825432606e-13	mutated MAGGIE motif
chr10:53677635_A_G	chr10	53677535	53677735	+	-0.275227	4.78412346979336e-17	mutated MAGGIE motif
chr10:53677838_A_G	chr10	53677738	53677938	+	0.235579	9.48694408926962e-10	mutated MAGGIE motif
chr10:53678103_T_A	chr10	53678003	53678203	+	-0.287288	3.44059458589178e-14	mutated MAGGIE motif
chr10:53678104_A_T	chr10	53678004	53678204	+	-0.287277	3.44059458589178e-14	mutated MAGGIE motif
chr10:53678344_G_A	chr10	53678244	53678444	+	-0.259415	2.0077025185955105e-14	mutated MAGGIE motif
chr10:53678819_C_T	chr10	53678719	53678919	+	0.23546899999999996	9.48694408926962e-10	mutated MAGGIE motif
chr10:53679200_C_G	chr10	53679100	53679300	+	-0.398146	1.72988005452503e-26	mutated MAGGIE motif
chr10:53679978_A_G	chr10	53679878	53680078	+	0.235571	9.48694408926962e-10	mutated MAGGIE motif
chr10:53680099_G_A	chr10	53679999	53680199	+	0.19086800000000004	8.0890008359867e-10	mutated MAGGIE motif
chr10:53680107_C_T	chr10	53680007	53680207	+	0.194828	2.8604773298506604e-10	mutated MAGGIE motif
chr10:53789667_A_C	chr10	53789567	53789767	+	-0.207056	8.9855720129956e-07	mutated MAGGIE motif
chr10:53790461_C_T	chr10	53790361	53790561	+	0.24041700000000002	3.30614997244419e-08	mutated MAGGIE motif
chr10:53790625_C_A	chr10	53790525	53790725	+	0.24015699999999995	3.30614997244419e-08	mutated MAGGIE motif
chr10:53791217_T_C	chr10	53791117	53791317	+	0.19813000000000006	1.51301221769459e-06	mutated MAGGIE motif
chr10:56792879_A_G	chr10	56792779	56792979	+	-0.21055300000000005	0.00368271000175846	mutated MAGGIE motif
chr10:56794155_C_T	chr10	56794055	56794255	+	0.284994	7.583013261498059e-05	mutated MAGGIE motif
chr10:56903361_A_G	chr10	56903261	56903461	+	0.319558	5.62050267440543e-19	mutated MAGGIE motif
chr10:56903944_G_C	chr10	56903844	56904044	+	-0.31263	2.82155250518384e-19	mutated MAGGIE motif
chr10:56905151_A_G	chr10	56905051	56905251	+	-0.274092	1.43401151303069e-10	mutated MAGGIE motif
chr10:56905634_C_G	chr10	56905534	56905734	+	-0.318577	1.43620472603174e-19	mutated MAGGIE motif
chr10:56905675_A_T	chr10	56905575	56905775	+	0.31619600000000003	5.62050267440543e-19	mutated MAGGIE motif
chr10:56905760_C_T	chr10	56905660	56905860	+	0.315924	5.62050267440543e-19	mutated MAGGIE motif
chr10:56905947_C_T	chr10	56905847	56906047	+	-0.31859499999999996	1.43620472603174e-19	mutated MAGGIE motif
chr10:56905983_G_A	chr10	56905883	56906083	+	-0.318502	1.43620472603174e-19	mutated MAGGIE motif
chr10:56906385_T_C	chr10	56906285	56906485	+	-0.31859400000000004	1.43620472603174e-19	mutated MAGGIE motif
chr10:56906444_C_A	chr10	56906344	56906544	+	0.31601099999999993	5.62050267440543e-19	mutated MAGGIE motif
chr10:56906527_G_A	chr10	56906427	56906627	+	-0.318591	1.43620472603174e-19	mutated MAGGIE motif
chr10:56906893_G_A	chr10	56906793	56906993	+	0.2898890000000001	7.01684375430419e-12	mutated MAGGIE motif
chr10:56907110_T_C	chr10	56907010	56907210	+	0.19332799999999994	0.000629649057042069	mutated MAGGIE motif
chr10:59730712_G_A	chr10	59730612	59730812	+	-0.198786	7.931835547443391e-07	mutated MAGGIE motif
chr10:59731111_A_T	chr10	59731011	59731211	+	-0.248101	1.7703097412491002e-09	mutated MAGGIE motif
chr10:59731498_T_G	chr10	59731398	59731598	+	-0.25161500000000003	1.7703097412491002e-09	mutated MAGGIE motif
chr10:59731599_C_T	chr10	59731499	59731699	+	-0.13805700000000004	0.006333402971618289	mutated MAGGIE motif
chr10:59732781_G_A	chr10	59732681	59732881	+	-0.245333	1.7703097412491002e-09	mutated MAGGIE motif
chr10:59733318_A_G	chr10	59733218	59733418	+	-0.24816999999999997	1.7703097412491002e-09	mutated MAGGIE motif
chr10:59733812_A_G	chr10	59733712	59733912	+	-0.245367	1.7703097412491002e-09	mutated MAGGIE motif
chr10:59734068_A_G	chr10	59733968	59734168	+	-0.245241	1.7703097412491002e-09	mutated MAGGIE motif
chr10:59734197_T_C	chr10	59734097	59734297	+	-0.251685	1.7703097412491002e-09	mutated MAGGIE motif
chr10:59734426_C_G	chr10	59734326	59734526	+	-0.248076	1.7703097412491002e-09	mutated MAGGIE motif
chr10:59735163_A_C	chr10	59735063	59735263	+	-0.248124	1.7703097412491002e-09	mutated MAGGIE motif
chr10:59782369_C_T	chr10	59782269	59782469	+	0.09026299999999997	0.0024639047539965	mutated MAGGIE motif
chr10:59782682_C_T	chr10	59782582	59782782	+	0.09020099999999998	0.0024639047539965	mutated MAGGIE motif
chr10:59782764_A_T	chr10	59782664	59782864	+	0.09034300000000006	0.0024639047539965	mutated MAGGIE motif
chr10:59783588_G_A	chr10	59783488	59783688	+	0.09027700000000004	0.0024639047539965	mutated MAGGIE motif
chr10:59784008_G_A	chr10	59783908	59784108	+	0.090175	0.0024639047539965	mutated MAGGIE motif
chr10:59784396_T_A	chr10	59784296	59784496	+	0.090101	0.0024639047539965	mutated MAGGIE motif
chr10:59784487_C_A	chr10	59784387	59784587	+	0.090152	0.0024639047539965	mutated MAGGIE motif
chr10:59784819_T_C	chr10	59784719	59784919	+	0.09025699999999992	0.0024639047539965	mutated MAGGIE motif
chr10:59784862_A_C	chr10	59784762	59784962	+	0.09023900000000007	0.0024639047539965	mutated MAGGIE motif
chr10:59784899_G_A	chr10	59784799	59784999	+	0.09018500000000007	0.0024639047539965	mutated MAGGIE motif
chr10:59784998_TAAC_T	chr10	59784898	59785098	+	0.09026	0.0024639047539965	mutated MAGGIE motif
chr10:59785318_T_C	chr10	59785218	59785418	+	0.09026	0.0024639047539965	mutated MAGGIE motif
chr10:60272248_C_T	chr10	60272148	60272348	+	-0.099317	0.0378725844960145	mutated MAGGIE motif
chr10:60276068_A_G	chr10	60275968	60276168	+	-0.09881599999999996	0.0378725844960145	mutated MAGGIE motif
chr10:60276291_C_T	chr10	60276191	60276391	+	-0.099107	0.0378725844960145	mutated MAGGIE motif
chr10:60276829_C_T	chr10	60276729	60276929	+	-0.09933200000000003	0.0378725844960145	mutated MAGGIE motif
chr10:60277249_G_A	chr10	60277149	60277349	+	-0.09926900000000001	0.0378725844960145	mutated MAGGIE motif
chr10:60277489_C_T	chr10	60277389	60277589	+	-0.09931999999999996	0.0378725844960145	mutated MAGGIE motif
chr10:60277549_A_C	chr10	60277449	60277649	+	-0.09928899999999996	0.0378725844960145	mutated MAGGIE motif
chr10:60278255_G_A	chr10	60278155	60278355	+	-0.09935	0.0378725844960145	mutated MAGGIE motif
chr10:60278573_C_T	chr10	60278473	60278673	+	-0.099312	0.0378725844960145	mutated MAGGIE motif
chr10:60313174_G_A	chr10	60313074	60313274	+	0.14912499999999995	0.0265930153835446	mutated MAGGIE motif
chr10:60314183_A_C	chr10	60314083	60314283	+	0.14922000000000002	0.0265930153835446	mutated MAGGIE motif
chr10:60314275_G_A	chr10	60314175	60314375	+	0.171226	0.0265930153835446	mutated MAGGIE motif
chr10:60314625_AT_A	chr10	60314525	60314725	+	0.14921099999999998	0.0265930153835446	mutated MAGGIE motif
chr10:60314815_A_T	chr10	60314715	60314915	+	0.14910800000000002	0.0265930153835446	mutated MAGGIE motif
chr10:61322295_A_G	chr10	61322195	61322395	+	0.17841800000000008	0.0307787829480173	mutated MAGGIE motif
chr10:61438930_CACTTGGGTAGTGTGAGAA_C	chr10	61438830	61439030	+	0.153123	0.00707471629187414	mutated MAGGIE motif
chr10:61439422_C_A	chr10	61439322	61439522	+	0.15321800000000008	0.00707471629187414	mutated MAGGIE motif
chr10:62040531_A_G	chr10	62040431	62040631	+	0.10759399999999997	0.000763636029018341	mutated MAGGIE motif
chr10:62041129_T_C	chr10	62041029	62041229	+	0.14171699999999998	3.21416125130206e-05	mutated MAGGIE motif
chr10:62041296_T_A	chr10	62041196	62041396	+	0.141266	3.21416125130206e-05	mutated MAGGIE motif
chr10:62041348_C_T	chr10	62041248	62041448	+	0.13179100000000002	0.000224251257731994	mutated MAGGIE motif
chr10:62041591_T_C	chr10	62041491	62041691	+	0.140949	3.21416125130206e-05	mutated MAGGIE motif
chr10:62042174_C_A	chr10	62042074	62042274	+	0.13115200000000005	0.00022656087421739	mutated MAGGIE motif
chr10:62042627_G_A	chr10	62042527	62042727	+	0.094514	0.0114173268127777	mutated MAGGIE motif
chr10:62042734_A_G	chr10	62042634	62042834	+	-0.164393	2.04207735653527e-06	mutated MAGGIE motif
chr10:62044194_C_G	chr10	62044094	62044294	+	0.12802100000000005	0.000234613473080465	mutated MAGGIE motif
chr10:62044939_T_G	chr10	62044839	62045039	+	0.128324	0.000234613473080465	mutated MAGGIE motif
chr10:62045776_A_C	chr10	62045676	62045876	+	0.12811300000000006	0.000234613473080465	mutated MAGGIE motif
chr10:62045932_C_T	chr10	62045832	62046032	+	-0.162937	2.04207735653527e-06	mutated MAGGIE motif
chr10:63220463_A_G	chr10	63220363	63220563	+	-0.16173200000000004	0.0469226684842699	mutated MAGGIE motif
chr10:63220824_A_G	chr10	63220724	63220924	+	0.223471	3.528244577940421e-05	mutated MAGGIE motif
chr10:63222564_A_C	chr10	63222464	63222664	+	-0.16830500000000004	0.0469226684842699	mutated MAGGIE motif
chr10:63223455_A_G	chr10	63223355	63223555	+	0.21105699999999994	6.90258627873249e-05	mutated MAGGIE motif
chr10:63589822_T_G	chr10	63589722	63589922	+	-0.196805	0.0154467805166798	mutated MAGGIE motif
chr10:63590379_G_A	chr10	63590279	63590479	+	-0.188274	0.007156729492223659	mutated MAGGIE motif
chr10:63590712_G_A	chr10	63590612	63590812	+	-0.188283	0.007156729492223659	mutated MAGGIE motif
chr10:63590933_C_T	chr10	63590833	63591033	+	-0.188235	0.007156729492223659	mutated MAGGIE motif
chr10:66632075_G_A	chr10	66631975	66632175	+	0.152501	0.0316198608504296	mutated MAGGIE motif
chr10:67101278_A_C	chr10	67101178	67101378	+	0.09946499999999993	0.0192356096449848	mutated MAGGIE motif
chr10:6713760_T_C	chr10	6713660	6713860	+	-0.190946	0.0056117320967801	mutated MAGGIE motif
chr10:6713969_T_C	chr10	6713869	6714069	+	-0.16758099999999998	0.0145948976114523	mutated MAGGIE motif
chr10:6714424_T_C	chr10	6714324	6714524	+	-0.16208399999999998	0.0307937162690546	mutated MAGGIE motif
chr10:6716631_A_G	chr10	6716531	6716731	+	-0.182859	0.0056117320967801	mutated MAGGIE motif
chr10:6716636_T_A	chr10	6716536	6716736	+	-0.182859	0.0056117320967801	mutated MAGGIE motif
chr10:6716637_C_A	chr10	6716537	6716737	+	-0.18286	0.0056117320967801	mutated MAGGIE motif
chr10:6717396_T_C	chr10	6717296	6717496	+	-0.188362	0.0056117320967801	mutated MAGGIE motif
chr10:6717515_T_C	chr10	6717415	6717615	+	-0.212245	0.0056117320967801	mutated MAGGIE motif
chr10:70845734_C_CA	chr10	70845634	70845834	+	0.09661699999999997	0.0060526025655855105	mutated MAGGIE motif
chr10:70845816_A_G	chr10	70845716	70845916	+	-0.08608400000000001	0.00394382753381812	mutated MAGGIE motif
chr10:70846378_C_T	chr10	70846278	70846478	+	0.08651799999999997	0.0164297699433133	mutated MAGGIE motif
chr10:70846441_G_A	chr10	70846341	70846541	+	-0.08628500000000006	0.00394382753381812	mutated MAGGIE motif
chr10:70847318_A_G	chr10	70847218	70847418	+	0.10288399999999998	0.00394382753381812	mutated MAGGIE motif
chr10:70849892_G_A	chr10	70849792	70849992	+	0.103364	0.00394382753381812	mutated MAGGIE motif
chr10:70849959_G_A	chr10	70849859	70850059	+	-0.09280700000000004	0.00394382753381812	mutated MAGGIE motif
chr10:70850195_C_G	chr10	70850095	70850295	+	-0.09159199999999999	0.00394382753381812	mutated MAGGIE motif
chr10:70850280_C_T	chr10	70850180	70850380	+	0.10300900000000003	0.00394382753381812	mutated MAGGIE motif
chr10:70850676_A_G	chr10	70850576	70850776	+	0.102985	0.00394382753381812	mutated MAGGIE motif
chr10:70851873_T_C	chr10	70851773	70851973	+	0.10121599999999996	0.0060526025655855105	mutated MAGGIE motif
chr10:70852417_G_A	chr10	70852317	70852517	+	0.10053599999999996	0.0060526025655855105	mutated MAGGIE motif
chr10:71486707_T_C	chr10	71486607	71486807	+	-0.127075	0.0136590945883635	mutated MAGGIE motif
chr10:71487175_A_C	chr10	71487075	71487275	+	-0.127123	0.0136590945883635	mutated MAGGIE motif
chr10:71489538_T_C	chr10	71489438	71489638	+	-0.13225900000000002	0.0136590945883635	mutated MAGGIE motif
chr10:71490059_C_T	chr10	71489959	71490159	+	0.13216300000000006	0.0136590945883635	mutated MAGGIE motif
chr10:71490860_C_T	chr10	71490760	71490960	+	-0.131824	0.0136590945883635	mutated MAGGIE motif
chr10:71574966_T_C	chr10	71574866	71575066	+	0.09607900000000004	0.0105422633799508	mutated MAGGIE motif
chr10:71575551_G_A	chr10	71575451	71575651	+	0.128594	1.71696686744857e-06	mutated MAGGIE motif
chr10:71576478_A_G	chr10	71576378	71576578	+	0.10433400000000004	0.0087272541274688	mutated MAGGIE motif
chr10:71576808_A_G	chr10	71576708	71576908	+	-0.112087	0.0087272541274688	mutated MAGGIE motif
chr10:71577096_C_T	chr10	71576996	71577196	+	-0.107696	0.0035489872457894703	mutated MAGGIE motif
chr10:71577319_G_A	chr10	71577219	71577419	+	0.13364200000000004	1.98883210814389e-06	mutated MAGGIE motif
chr10:71577764_C_T	chr10	71577664	71577864	+	-0.106794	0.00893781262213422	mutated MAGGIE motif
chr10:71577902_C_T	chr10	71577802	71578002	+	0.130525	1.37973731452932e-06	mutated MAGGIE motif
chr10:71578300_T_C	chr10	71578200	71578400	+	0.11271399999999998	0.00139593551149024	mutated MAGGIE motif
chr10:71579347_C_A	chr10	71579247	71579447	+	0.14066800000000002	5.25419133293116e-08	mutated MAGGIE motif
chr10:71579681_G_A	chr10	71579581	71579781	+	0.148984	2.66214302708817e-08	mutated MAGGIE motif
chr10:71579977_A_G	chr10	71579877	71580077	+	-0.11151700000000003	0.000883122868127122	mutated MAGGIE motif
chr10:71580120_T_C	chr10	71580020	71580220	+	-0.10691499999999997	0.0077756858842137795	mutated MAGGIE motif
chr10:71580893_G_A	chr10	71580793	71580993	+	0.14454699999999998	2.04177175558158e-08	mutated MAGGIE motif
chr10:71582371_G_A	chr10	71582271	71582471	+	0.1359100000000001	5.984580409717171e-07	mutated MAGGIE motif
chr10:71582455_G_A	chr10	71582355	71582555	+	0.11018300000000003	0.0008625862817348111	mutated MAGGIE motif
chr10:71582636_T_A	chr10	71582536	71582736	+	-0.095792	0.0152157634836366	mutated MAGGIE motif
chr10:71582996_C_T	chr10	71582896	71583096	+	-0.10460499999999999	0.0126426394250497	mutated MAGGIE motif
chr10:71583223_G_A	chr10	71583123	71583323	+	0.13239100000000004	5.90978183364902e-07	mutated MAGGIE motif
chr10:71583391_A_G	chr10	71583291	71583491	+	0.1068	0.0007547971747390982	mutated MAGGIE motif
chr10:72872069_T_TTTTCTC	chr10	72871969	72872169	+	-0.13300800000000002	0.0300157618397252	mutated MAGGIE motif
chr10:72872252_G_A	chr10	72872152	72872352	+	0.13649	0.029245476778234	mutated MAGGIE motif
chr10:72872609_C_G	chr10	72872509	72872709	+	-0.13333299999999998	0.0300157618397252	mutated MAGGIE motif
chr10:72872653_T_A	chr10	72872553	72872753	+	0.13636600000000001	0.029245476778234	mutated MAGGIE motif
chr10:72872879_A_T	chr10	72872779	72872979	+	-0.13306599999999996	0.0300157618397252	mutated MAGGIE motif
chr10:73001924_C_A	chr10	73001824	73002024	+	-0.121021	0.0111391358161302	mutated MAGGIE motif
chr10:73451573_C_T	chr10	73451473	73451673	+	0.12771	0.0279237994999717	mutated MAGGIE motif
chr10:73452460_T_C	chr10	73452360	73452560	+	0.11410399999999997	0.0446383941988782	mutated MAGGIE motif
chr10:73452461_G_T	chr10	73452361	73452561	+	0.114097	0.0446383941988782	mutated MAGGIE motif
chr10:74870507_A_C	chr10	74870407	74870607	+	-0.15931900000000002	0.0351790051096141	mutated MAGGIE motif
chr10:74870853_T_G	chr10	74870753	74870953	+	-0.15868100000000002	0.0351790051096141	mutated MAGGIE motif
chr10:74870854_A_C	chr10	74870754	74870954	+	-0.15868100000000002	0.0351790051096141	mutated MAGGIE motif
chr10:75576405_G_C	chr10	75576305	75576505	+	0.08526	0.0419100543849252	mutated MAGGIE motif
chr10:75576483_T_C	chr10	75576383	75576583	+	0.08525699999999993	0.0419100543849252	mutated MAGGIE motif
chr10:75577843_G_A	chr10	75577743	75577943	+	0.077287	0.0419100543849252	mutated MAGGIE motif
chr10:75578720_G_T	chr10	75578620	75578820	+	0.08503800000000006	0.0419100543849252	mutated MAGGIE motif
chr10:75578948_T_C	chr10	75578848	75579048	+	0.08512200000000003	0.0419100543849252	mutated MAGGIE motif
chr10:75653372_G_T	chr10	75653272	75653472	+	0.07691000000000002	0.0317842616133373	mutated MAGGIE motif
chr10:75653904_A_T	chr10	75653804	75654004	+	0.08665500000000004	0.0133786304455861	mutated MAGGIE motif
chr10:75654931_G_A	chr10	75654831	75655031	+	0.078592	0.015114049101828004	mutated MAGGIE motif
chr10:75655628_G_C	chr10	75655528	75655728	+	0.08720799999999995	0.0133786304455861	mutated MAGGIE motif
chr10:75661149_C_T	chr10	75661049	75661249	+	0.06453299999999995	0.033539884839066	mutated MAGGIE motif
chr10:75661162_G_C	chr10	75661062	75661262	+	0.06295600000000001	0.0335651317098991	mutated MAGGIE motif
chr10:75669013_T_C	chr10	75668913	75669113	+	0.11857799999999995	0.0287698857872197	mutated MAGGIE motif
chr10:75669190_G_T	chr10	75669090	75669290	+	0.10523000000000003	0.0364331839718496	mutated MAGGIE motif
chr10:75671162_G_T	chr10	75671062	75671262	+	0.12191200000000002	0.0287698857872197	mutated MAGGIE motif
chr10:75672377_G_GT	chr10	75672277	75672477	+	0.11322500000000002	0.0287698857872197	mutated MAGGIE motif
chr10:75909634_G_A	chr10	75909534	75909734	+	0.09977400000000004	0.0390832545657303	mutated MAGGIE motif
chr10:75911276_C_A	chr10	75911176	75911376	+	0.09772100000000006	0.0390832545657303	mutated MAGGIE motif
chr10:75911342_C_G	chr10	75911242	75911442	+	0.09848599999999996	0.0390832545657303	mutated MAGGIE motif
chr10:75983673_C_G	chr10	75983573	75983773	+	0.099445	0.0255233657757108	mutated MAGGIE motif
chr10:75983842_T_C	chr10	75983742	75983942	+	0.12842900000000002	0.0232857439527588	mutated MAGGIE motif
chr10:75984006_C_G	chr10	75983906	75984106	+	0.128753	0.0232857439527588	mutated MAGGIE motif
chr10:75984756_G_A	chr10	75984656	75984856	+	0.12833100000000008	0.0232857439527588	mutated MAGGIE motif
chr10:75984863_A_G	chr10	75984763	75984963	+	0.09823900000000008	0.0255233657757108	mutated MAGGIE motif
chr10:75987748_G_A	chr10	75987648	75987848	+	0.12855399999999995	0.0232857439527588	mutated MAGGIE motif
chr10:75990328_A_G	chr10	75990228	75990428	+	0.09846999999999996	0.0255233657757108	mutated MAGGIE motif
chr10:75990598_T_C	chr10	75990498	75990698	+	0.09848100000000004	0.0255233657757108	mutated MAGGIE motif
chr10:75991721_C_T	chr10	75991621	75991821	+	0.098402	0.0255233657757108	mutated MAGGIE motif
chr10:77863055_G_A	chr10	77862955	77863155	+	0.13573800000000005	0.035267843666007985	mutated MAGGIE motif
chr10:77864252_CCTCCCTGCAGCTCTGGGTCTCCCTGCAGCTCTAGGT_C	chr10	77864152	77864352	+	0.13580699999999998	0.035267843666007985	mutated MAGGIE motif
chr10:77864524_G_A	chr10	77864424	77864624	+	0.13611800000000007	0.035267843666007985	mutated MAGGIE motif
chr10:77864927_G_A	chr10	77864827	77865027	+	0.14071599999999995	0.035267843666007985	mutated MAGGIE motif
chr10:79604579_C_T	chr10	79604479	79604679	+	0.15016400000000008	0.0231998452006015	mutated MAGGIE motif
chr10:79605096_A_C	chr10	79604996	79605196	+	0.15829899999999994	0.0231998452006015	mutated MAGGIE motif
chr10:80827015_C_T	chr10	80826915	80827115	+	0.15115	0.0013122385678285599	mutated MAGGIE motif
chr10:80828245_A_G	chr10	80828145	80828345	+	0.17338699999999996	0.00012883507650788	mutated MAGGIE motif
chr10:80829654_T_G	chr10	80829554	80829754	+	0.15085899999999994	0.0013122385678285599	mutated MAGGIE motif
chr10:80829667_T_G	chr10	80829567	80829767	+	0.15136099999999994	0.0013122385678285599	mutated MAGGIE motif
chr10:80830551_T_C	chr10	80830451	80830651	+	0.16121000000000008	0.00012883507650788	mutated MAGGIE motif
chr10:80831184_C_T	chr10	80831084	80831284	+	0.15085800000000005	0.0013122385678285599	mutated MAGGIE motif
chr10:80831898_A_G	chr10	80831798	80831998	+	0.15121800000000007	0.0013122385678285599	mutated MAGGIE motif
chr10:80832067_A_C	chr10	80831967	80832167	+	0.16119899999999998	0.00012883507650788	mutated MAGGIE motif
chr10:80834562_A_G	chr10	80834462	80834662	+	0.08430300000000003	0.0298660813909112	mutated MAGGIE motif
chr10:80886061_C_T	chr10	80885961	80886161	+	0.264606	3.927773474682629e-09	mutated MAGGIE motif
chr10:80886412_A_G	chr10	80886312	80886512	+	-0.14869899999999994	0.0378641052098774	mutated MAGGIE motif
chr10:80886599_G_C	chr10	80886499	80886699	+	0.2647609999999999	3.927773474682629e-09	mutated MAGGIE motif
chr10:80886726_A_G	chr10	80886626	80886826	+	0.24420699999999995	8.88698545550839e-08	mutated MAGGIE motif
chr10:80886835_T_C	chr10	80886735	80886935	+	0.26458000000000004	3.927773474682629e-09	mutated MAGGIE motif
chr10:80887212_C_T	chr10	80887112	80887312	+	0.26456099999999994	3.927773474682629e-09	mutated MAGGIE motif
chr10:80887337_G_A	chr10	80887237	80887437	+	0.26479899999999995	3.927773474682629e-09	mutated MAGGIE motif
chr10:80887721_T_G	chr10	80887621	80887821	+	0.2441439999999999	8.88698545550839e-08	mutated MAGGIE motif
chr10:80888588_A_AAAAAG	chr10	80888488	80888688	+	0.244358	8.88698545550839e-08	mutated MAGGIE motif
chr10:80888858_G_A	chr10	80888758	80888958	+	0.24397	8.88698545550839e-08	mutated MAGGIE motif
chr10:80889806_A_G	chr10	80889706	80889906	+	0.2646930000000001	3.927773474682629e-09	mutated MAGGIE motif
chr10:80890671_T_A	chr10	80890571	80890771	+	0.26468200000000003	3.927773474682629e-09	mutated MAGGIE motif
chr10:80890674_T_C	chr10	80890574	80890774	+	0.264679	3.927773474682629e-09	mutated MAGGIE motif
chr10:85365766_A_G	chr10	85365666	85365866	+	0.09648599999999996	0.0401278934637429	mutated MAGGIE motif
chr10:85368250_G_A	chr10	85368150	85368350	+	0.20418100000000008	1.69973273331175e-05	mutated MAGGIE motif
chr10:90039355_A_AACAC	chr10	90039255	90039455	+	0.239553	0.0036514388114457295	mutated MAGGIE motif
chr10:90741955_T_C	chr10	90741855	90742055	+	0.129598	0.0062451794977765795	mutated MAGGIE motif
chr10:90742008_A_G	chr10	90741908	90742108	+	-0.12254499999999995	0.00935891466332127	mutated MAGGIE motif
chr10:90742049_C_T	chr10	90741949	90742149	+	0.12953599999999998	0.0062451794977765795	mutated MAGGIE motif
chr10:90743197_G_A	chr10	90743097	90743297	+	0.12949300000000008	0.0062451794977765795	mutated MAGGIE motif
chr10:90743434_A_T	chr10	90743334	90743534	+	-0.12273499999999997	0.00935891466332127	mutated MAGGIE motif
chr10:90744325_C_A	chr10	90744225	90744425	+	0.10982400000000003	0.0271399330257532	mutated MAGGIE motif
chr10:90753273_C_T	chr10	90753173	90753373	+	-0.11841900000000001	0.0182441165748846	mutated MAGGIE motif
chr10:91175016_T_A	chr10	91174916	91175116	+	-0.09891100000000004	0.0169846286678175	mutated MAGGIE motif
chr10:91175412_A_G	chr10	91175312	91175512	+	-0.09880500000000003	0.0169846286678175	mutated MAGGIE motif
[truncated: 23,622 more rows]
