# Supplementary material for: Systematic analysis of naturally occurring insertions and deletions that alter transcription factor spacing identifies tolerant and sensitive transcription factor pairs
Source: eLife. 2022 Jan 20;11:e70878. doi: 10.7554/eLife.70878 (PMC8809895; doi:10.7554/eLife.70878)
Supplement: Supplementary file 1. [file elife-70878-supp1.xlsx]

## Sheet: Motifs
Transcription factor	Family	Data source	Motif source	Core motif logo
FOSL1	AP-1	https://www.encodeproject.org/experiments/ENCSR239ZLZ/	JASPAR
JUN	AP-1	https://www.encodeproject.org/experiments/ENCSR000EFS/	JASPAR
JUNB	AP-1	https://www.encodeproject.org/experiments/ENCSR795IYP/	JASPAR
JUND	AP-1	https://www.encodeproject.org/experiments/ENCSR000EGN/	JASPAR
NRF1	AP-1	https://www.encodeproject.org/experiments/ENCSR837EYC/	JASPAR
BACH1	AP-1	https://www.encodeproject.org/experiments/ENCSR000EGD/	JASPAR
NFE2	AP-1	https://www.encodeproject.org/experiments/ENCSR000FCC/	JASPAR
CREB1	AP-1	https://www.encodeproject.org/experiments/ENCSR000BSO/	JASPAR
CREM	AP-1	https://www.encodeproject.org/experiments/ENCSR077DKV/	JASPAR
ATF1	AP-1	https://www.encodeproject.org/experiments/ENCSR159OCC/	JASPAR
ATF3	AP-1	https://www.encodeproject.org/experiments/ENCSR028UIU/	JASPAR
MAFK	AP-1	https://www.encodeproject.org/experiments/ENCSR000EGX/	JASPAR
CEBPB	C/EBP	https://www.encodeproject.org/experiments/ENCSR000EHE/	JASPAR
CEBPG	C/EBP	https://www.encodeproject.org/experiments/ENCSR490LWA/	JASPAR
EGR1	zinc finger-C2H2	https://www.encodeproject.org/experiments/ENCSR024CNP/	JASPAR
KLF1	zinc finger-C2H2	https://www.encodeproject.org/experiments/ENCSR550HCT/	JASPAR
KLF13	zinc finger-C2H2	https://www.encodeproject.org/experiments/ENCSR608HVP/	JASPAR
KLF16	zinc finger-C2H2	https://www.encodeproject.org/experiments/ENCSR760UVO/	JASPAR
SP1	zinc finger-C2H2	https://www.encodeproject.org/experiments/ENCSR991ELG/	JASPAR
CTCF	zinc finger-C2H2	https://www.encodeproject.org/experiments/ENCSR000EGM/	JASPAR
IKZF1	zinc finger-C2H2	https://www.encodeproject.org/experiments/ENCSR948VFL/	JASPAR
RREB1	zinc finger-C2H2	https://www.encodeproject.org/experiments/ENCSR250WFW/	JASPAR
ZEB2	zinc finger-C2H2	https://www.encodeproject.org/experiments/ENCSR322CFO/	JASPAR
ELF1	ETS	https://www.encodeproject.org/experiments/ENCSR502OEK/	JASPAR
ELF4	ETS	https://www.encodeproject.org/experiments/ENCSR638QHV/	JASPAR
ELK1	ETS	https://www.encodeproject.org/experiments/ENCSR000EFU/	JASPAR
ETS1	ETS	https://www.encodeproject.org/experiments/ENCSR000BKQ/	JASPAR
ETV1	ETS	https://www.encodeproject.org/experiments/ENCSR277DMR/	JASPAR
ETV6	ETS	https://www.encodeproject.org/experiments/ENCSR000FCE/	JASPAR
SPI1	ETS	https://www.encodeproject.org/experiments/ENCSR000BGW/	JASPAR
GABPA	ETS	https://www.encodeproject.org/experiments/ENCSR290MUH/	JASPAR
GATA1	GATA	https://www.encodeproject.org/experiments/ENCSR000EFT/	JASPAR
GATA2	GATA	https://www.encodeproject.org/experiments/ENCSR257RKC/	JASPAR
IRF1	IRF	https://www.encodeproject.org/experiments/ENCSR854MCV/	JASPAR
IRF2	IRF	https://www.encodeproject.org/experiments/ENCSR376WCJ/	JASPAR
IRF9	IRF	https://www.encodeproject.org/experiments/ENCSR926KTP/	JASPAR
RUNX1	Runt	https://www.encodeproject.org/experiments/ENCSR588AKU/	JASPAR
TAL1	bHLH	https://www.encodeproject.org/experiments/ENCSR000EHB/	HOMER
TCF3	bHLH	https://www.encodeproject.org/experiments/ENCSR970OJY/	JASPAR
TCF12	bHLH	https://www.encodeproject.org/experiments/ENCSR744WOO/	JASPAR
USF2	bHLH	https://www.encodeproject.org/experiments/ENCSR578KEN/	JASPAR
MYC	bHLH	https://www.encodeproject.org/experiments/ENCSR000EGJ/	JASPAR
SREBF2	bHLH	https://www.encodeproject.org/experiments/ENCSR150QDE/	JASPAR
BHLHE40	bHLH	https://www.encodeproject.org/experiments/ENCSR000EGV/	JASPAR
NFATC3	Rel homology domain	https://www.encodeproject.org/experiments/ENCSR670FDA/	JASPAR
PKNOX1	homeobox	https://www.encodeproject.org/experiments/ENCSR115SMW/	HOMER
PBX2	homeobox	https://www.encodeproject.org/experiments/ENCSR633EIC/	JASPAR
MEIS2	homeobox	https://www.encodeproject.org/experiments/ENCSR851BNE/	JASPAR
SRF	SRF	https://www.encodeproject.org/experiments/ENCSR582IAO/	JASPAR
MEF2A	SRF	https://www.encodeproject.org/experiments/ENCSR000BNV/	JASPAR
CUX1	CUT	https://www.encodeproject.org/experiments/ENCSR000EFO/	JASPAR
NR2C1	zinc finger-C4	https://www.encodeproject.org/experiments/ENCSR742IDN/	JASPAR
NR2C2	zinc finger-C4	https://www.encodeproject.org/experiments/ENCSR750LYM/	JASPAR
NR2F1	zinc finger-C4	https://www.encodeproject.org/experiments/ENCSR970NKQ/	JASPAR
NR2F2	zinc finger-C4	https://www.encodeproject.org/experiments/ENCSR000BRS/	JASPAR
NR2F6	zinc finger-C4	https://www.encodeproject.org/experiments/ENCSR087TYG/	HOMER
STAT1	STAT	https://www.encodeproject.org/experiments/ENCSR000FAV/	JASPAR
STAT2	STAT	https://www.encodeproject.org/experiments/ENCSR000FAT/	JASPAR
STAT5A	STAT	https://www.encodeproject.org/experiments/ENCSR000BRR/	JASPAR
SOX6	HMG	https://www.encodeproject.org/experiments/ENCSR788RSW/	JASPAR
FOXA3	fork head	https://www.encodeproject.org/experiments/ENCSR231ZVN/	JASPAR
FOXJ2	fork head	https://www.encodeproject.org/experiments/ENCSR847LBF/	JASPAR
E2F1	E2F	https://www.encodeproject.org/experiments/ENCSR563LLO/	JASPAR
E2F3	E2F	https://www.encodeproject.org/experiments/ENCSR036QIR/	HOMER
E2F5	E2F	https://www.encodeproject.org/experiments/ENCSR709DRM/	JASPAR
E2F7	E2F	https://www.encodeproject.org/experiments/ENCSR171CAY/	HOMER
E2F8	E2F	https://www.encodeproject.org/experiments/ENCSR953DVM/	HOMER
TFDP1	E2F	https://www.encodeproject.org/experiments/ENCSR017GBO/	JASPAR
NFIC	NFI	https://www.encodeproject.org/experiments/ENCSR796ITY/	JASPAR
NFIX	NFI	https://www.encodeproject.org/experiments/ENCSR574VJG/	JASPAR
TEAD1	TEA	https://www.encodeproject.org/experiments/ENCSR591ASD/	JASPAR
TEAD2	TEA	https://www.encodeproject.org/experiments/ENCSR635GTR/	JASPAR
TEAD4	TEA	https://www.encodeproject.org/experiments/ENCSR000BRK/	JASPAR

## Sheet: ENCODE ChIP-seq peak statistics
	total ChIP-seq peaks	peaks w/ binding site	% peaks w/ binding site		Average % peaks w/ binding site
ATF1	15778	4287	0.271707		0.425569
ATF3	35930	9419	0.262149
BACH1	9085	5158	0.567749
BHLHE40	50147	18966	0.378208
CEBPB	65283	51468	0.788383
CEBPG	20538	12898	0.628007
CREB1	32418	8431	0.260072
CREM	66273	13825	0.208607
CTCF	61560	54199	0.880426
CUX1	26895	7253	0.269678
E2F1	7760	3705	0.477448
E2F3	21233	6522	0.307163
E2F5	55455	8448	0.15234
E2F7	13842	2805	0.202644
E2F8	27629	7801	0.282348
EGR1	27163	18333	0.674925
ELF1	12572	7138	0.56777
ELF4	16374	7207	0.440149
ELK1	7455	3530	0.473508
ETS1	30297	7889	0.260389
ETV1	23112	14841	0.642134
ETV6	21391	8814	0.412042
FOSL1	49793	28784	0.578073
FOXA3	17492	9049	0.517322
FOXJ2	31432	10606	0.337427
GABPA	31432	18760	0.596844
GATA1	24612	12723	0.516943
GATA2	57090	21785	0.38159
IKZF1	56093	28904	0.515287
IRF1	5198	3212	0.61793
IRF2	31622	11397	0.360414
IRF9	13316	2830	0.212526
JUN	36070	11186	0.310119
JUNB	20406	7081	0.347006
JUND	65679	27286	0.415445
KLF1	8977	4403	0.490476
KLF13	10971	4092	0.372983
KLF16	40741	13960	0.342652
MAFK	47074	30489	0.647682
MEF2A	20622	7114	0.344971
MEIS2	32355	14545	0.449544
MYC	42512	15961	0.375447
NFATC3	26131	9751	0.373158
NFE2	60617	24140	0.398238
NFIC	51394	37926	0.737946
NFIX	8879	5695	0.641401
NR2C1	16567	5835	0.352206
NR2C2	39114	13410	0.342844
NR2F1	23951	10626	0.443656
NR2F2	64601	22251	0.344437
NR2F6	22690	9261	0.408153
NRF1	26750	16951	0.633682
PBX2	14104	6104	0.432785
PKNOX1	24814	15003	0.604618
RREB1	19828	5274	0.265987
RUNX1	41839	13488	0.322379
SOX6	52564	15803	0.300643
SP1	10946	6411	0.585693
SPI1	38706	35161	0.908412
SREBF2	34944	3985	0.11404
SRF	48706	9500	0.195048
STAT1	7029	3767	0.535923
STAT2	14502	3736	0.25762
STAT5A	32762	9452	0.288505
TAL1	36838	22931	0.622482
TCF12	16414	5587	0.34038
TCF3	67270	21433	0.318612
TEAD1	28327	8361	0.29516
TEAD2	11241	4361	0.387955
TEAD4	76028	23019	0.30277
TFDP1	31442	8825	0.280676
USF2	45379	26613	0.586461
ZEB2	38168	11685	0.306147

## Sheet: gRNA targets & specific primers
Region ID	Region	Motif spacing (bp)	DNA sequence from PU.1 motif to C/EBP motif	gRNA forward sequence	locus-specific Nextera hybrid primer I7	locus-specific Nextera hybrid primer I5
#1	chr1:171619246-171619312	41	CTTGCAACACTTTGTTGGTTTCGTTTCTGCACTGCCAAGGGCGGACTCCTTTGACTTCTCCTTTCA	AAGTCAAAGGAGTCCGCCCT	5'-Biotin-GTCTCGTGGGCTCGGAGATGTGTATAAGAGACAGNNNNNNNNNNGTCTTGCTGAGGCGAGAG*C	TCGTCGGCAGCGTCAGATGTGTATAAGAGACAGTCTTGAAACAGCAATAAAGAGAATGTAAG*C
#2	chr7:79884023-79884088	40	GTTATGCAAGACTGGTTTTCATATTATTCCTTGGGGGAACTCCATTGCGTACACTTCCCTATCAA	TACGCAATGGAGTTCCCCCA	5'-Biotin-GTCTCGTGGGCTCGGAGATGTGTATAAGAGACAGNNNNNNNNNNACAACGTACATCACCCATAGTATA*C	TCGTCGGCAGCGTCAGATGTGTATAAGAGACAGGTGTGTACCCAGACACTGAATT*G
#3	chr15:59413413-59413493	55	ATTGCATAATTATAGGTTTGTCTGCCTTTAGGAAAACCATAAGCAGGCCAGCTTCATCCAGTTAGAGACTTCTCCAATTA	GGATGAAGCTGGCCTGCTTA	5'-Biotin-GTCTCGTGGGCTCGGAGATGTGTATAAGAGACAGNNNNNNNNNNAAGCAGGGAATAGTAAGAGTTATTG*C	TCGTCGGCAGCGTCAGATGTGTATAAGAGACAGCACCCCAAGACAAAGAATAACAGAAT*C
#4	chr7:100182587-100182666	54	CTTGCGCAACCCTTAGGAACTGGGAGATCACCCTTGGTTCTGAGGTTTGTGTCTCTGGTTCCTTCCTCTTCCTCCTCTT	AGGAACTGGGAGATCACCCT	5'-Biotin-GTCTCGTGGGCTCGGAGATGTGTATAAGAGACAGNNNNNNNNNNTCTAGGCTAGCTTGAGCCAGTTGTTGCAG*G	TCGTCGGCAGCGTCAGATGTGTATAAGAGACAGCTTGCAAGGTGCATCTGGAAGCAGC*C
#5	chr12:70107067-70107118	26	TCACTTCCCTATTTCAAATGTAGAAATTGGGCCTAGGAAGAATTAAGCAAC	CCTATTTCAAATGTAGAAAT	5'-Biotin-GTCTCGTGGGCTCGGAGATGTGTATAAGAGACAGNNNNNNNNNNCCCAGCATTTACTAGGAGTCCGGCC*T	TCGTCGGCAGCGTCAGATGTGTATAAGAGACAGCATCGTTGCATCCTGTGAGCATGTGTAG*G
#6	chr4:116788188-116788688	26	CTTATGGGGAAGTGAACGTTCCTGCTAATGGGGCACACAGTGTTTAGCAAC	GAAGTGAACGTTCCTGCTAA	5'-Biotin-GTCTCGTGGGCTCGGAGATGTGTATAAGAGACAGNNNNNNNNNNCGTCCAGGGAAGCTGACCAGG*C	TCGTCGGCAGCGTCAGATGTGTATAAGAGACAGCCATGAGCCCTCAAAAACCACAACTTCTC*G
Note: In locus-specific primers, the stretch of 10 "N"s denotes the unique molecular ID (MID), which allows for providing nucleotide complexity for the sequencer in read1 for sequencer to normalize the rest of run bp reads. The red regions correspond to Nextera-based adapter sequences for binding to flow cell and sites for sequencing primers. The blue sequence is locus-specific for amplification …

## Sheet: index primers & reads stats
Region ID	Antibody	Nextera index primer I7	Nextera index primer I5	Total reads	% reads being aligned concordantly 1 time	Total valid reads (InDel at cut sites)
#1	input	CAAGCAGAAGACGGCATACGAGATGTCTTAGACTGTCTCGTGGGCTCGGAGATGT*G	AATGATACGGCGACCACCGAGATCTACACTTCACTTCAGTCGTCGGCAGCGTCAGATGTGTA*T	18314047	96.1	16189879
#1	C/EBPβ	CAAGCAGAAGACGGCATACGAGATAAGTTCCCACGTCTCGTGGGCTCGGAGATGT*G	AATGATACGGCGACCACCGAGATCTACACCTGTAAGTGCTCGTCGGCAGCGTCAGATGTGTA*T	11436997	95.27	10574062
#2	input	CAAGCAGAAGACGGCATACGAGATAAGCCCGTAGGTCTCGTGGGCTCGGAGATGT*G	AATGATACGGCGACCACCGAGATCTACACAGGGACGCCTTCGTCGGCAGCGTCAGATGTGTA*T	8845419	93.37	7938508
#2	C/EBPβ	CAAGCAGAAGACGGCATACGAGATTTTCGTGAGGGTCTCGTGGGCTCGGAGATGT*G	AATGATACGGCGACCACCGAGATCTACACGCACAGGGCATCGTCGGCAGCGTCAGATGTGTA*T	5601006	85.94	4365885
#3	input	CAAGCAGAAGACGGCATACGAGATATGGGTAAGGGTCTCGTGGGCTCGGAGATGT*G	AATGATACGGCGACCACCGAGATCTACACGTTGCCGGGATCGTCGGCAGCGTCAGATGTGTA*T	12390630	98.52	11601863
#3	C/EBPβ	CAAGCAGAAGACGGCATACGAGATCCGAAGGAGAGTCTCGTGGGCTCGGAGATGT*G	AATGATACGGCGACCACCGAGATCTACACGCGACGGACATCGTCGGCAGCGTCAGATGTGTA*T	8717165	94.83	8038489
#4	input	CAAGCAGAAGACGGCATACGAGATCACAGACATCGTCTCGTGGGCTCGGAGATGT*G	AATGATACGGCGACCACCGAGATCTACACCGGTAGCACGTCGTCGGCAGCGTCAGATGTGTA*T	839911	91.47	703686
#4	C/EBPβ	CAAGCAGAAGACGGCATACGAGATCATCGGGTTCGTCTCGTGGGCTCGGAGATGT*G	AATGATACGGCGACCACCGAGATCTACACCCCGGATAGATCGTCGGCAGCGTCAGATGTGTA*T	15562838	97.34	14157396
#5	input	CAAGCAGAAGACGGCATACGAGATACGTCAAATTGTCTCGTGGGCTCGGAGATGT*G	AATGATACGGCGACCACCGAGATCTACACCCTCACTTCTTCGTCGGCAGCGTCAGATGTGTA*T	7737394	98.6	7304173
#5	C/EBPβ	CAAGCAGAAGACGGCATACGAGATAAGCGTTCTAGTCTCGTGGGCTCGGAGATGT*G	AATGATACGGCGACCACCGAGATCTACACCGTTTGCGACTCGTCGGCAGCGTCAGATGTGTA*T	7288150	98.73	7036157
#6	input	CAAGCAGAAGACGGCATACGAGATAAAGCTTACAGTCTCGTGGGCTCGGAGATGT*G	AATGATACGGCGACCACCGAGATCTACACGACTAGTCCGTCGTCGGCAGCGTCAGATGTGTA*T	10305938	91.32	9402129
#6	C/EBPβ	CAAGCAGAAGACGGCATACGAGATCGTAACTGATGTCTCGTGGGCTCGGAGATGT*G	AATGATACGGCGACCACCGAGATCTACACAGAGATTGTATCGTCGGCAGCGTCAGATGTGTA*T	10701541	91.93	10055336
#1	PU.1	CAAGCAGAAGACGGCATACGAGATGCTATGTCTTGTCTCGTGGGCTCGGAGATGT*G	AATGATACGGCGACCACCGAGATCTACACACGTCCACATTCGTCGGCAGCGTCAGATGTGTA*T	11767072	69.15	7724859
#5	PU.1	CAAGCAGAAGACGGCATACGAGATTAGTCTAACAGTCTCGTGGGCTCGGAGATGT*G	AATGATACGGCGACCACCGAGATCTACACGTCGTCATGATCGTCGGCAGCGTCAGATGTGTA*T	13169382	85.44	10975990
#6	PU.1	CAAGCAGAAGACGGCATACGAGATGTGGCCACTCGTCTCGTGGGCTCGGAGATGT*G	AATGATACGGCGACCACCGAGATCTACACACTGTGCATCTCGTCGGCAGCGTCAGATGTGTA*T	7343354	79.4	5692384
